# Supplementary material for: A Novel Classification Method for Flutter Signals Based on the CNN and STFT
Source: Hindawi journal article supplement (doi:10.1155/2019/9375437), 2019-04-09
Supplement: f1 [file 9375437.f1.zip]

Archive with 89 entries (89 files):
- 00_25_z15.0_10channel.txt
- 00_25_z15.0_11channel.txt
- 00_25_z15.0_12channel.txt
- 00_25_z15.0_13channel.txt
- 00_25_z15.0_14channel.txt
- 00_25_z15.0_15channel.txt
- 00_25_z15.0_16channel.txt
- 00_25_z15.0_17channel.txt
- 00_25_z15.0_18channel.txt
- 00_25_z15.0_19channel.txt
- 00_25_z15.0_20channel.txt
- 00_25_z15.0_21channel.txt
- 00_25_z15.0_22channel.txt
- 00_25_z15.0_23channel.txt
- 00_25_z15.0_24channel.txt
- 00_25_z15.0_25channel.txt
- 00_25_z15.0_26channel.txt
- 00_25_z15.0_27channel.txt
- 00_25_z15.0_28channel.txt
- 00_25_z15.0_29channel.txt
- 00_25_z15.0_30channel.txt
- 00_25_z15.0_31channel.txt
- 00_25_z15.0_32channel.txt
- 00_25_z15.0_33channel.txt
- 00_25_z15.0_34channel.txt
- 00_25_z15.0_35channel.txt
- 00_25_z15.0_36channel.txt
- 00_25_z15.0_37channel.txt
- 00_25_z15.0_38channel.txt
- 00_25_z15.0_39channel.txt
- 00_25_z15.0_40channel.txt
- 00_25_z15.0_4channel.txt
- 00_25_z15.0_7channel.txt
- 00_25_z15.0_8channel.txt
- 00_25_z15.0_9channel.txt
- 00_25_z18.0_10channel.txt
- 00_25_z18.0_11channel.txt
- 00_25_z18.0_12channel.txt
- 00_25_z18.0_13channel.txt
- 00_25_z18.0_14channel.txt
- 00_25_z18.0_15channel.txt
- 00_25_z18.0_16channel.txt
- 00_25_z18.0_17channel.txt
- 00_25_z18.0_18channel.txt
- 00_25_z18.0_19channel.txt
- 00_25_z18.0_1channel.txt
- 00_25_z18.0_20channel.txt
- 00_25_z18.0_21channel.txt
- 00_25_z18.0_22channel.txt
- 00_25_z18.0_23channel.txt
- 00_25_z18.0_24channel.txt
- 00_25_z18.0_25channel.txt
- 00_25_z18.0_26channel.txt
- 00_25_z18.0_27channel.txt
- 00_25_z18.0_28channel.txt
- 00_25_z18.0_29channel.txt
- 00_25_z18.0_2channel.txt
- 00_25_z18.0_30channel.txt
- 00_25_z18.0_31channel.txt
- 00_25_z18.0_32channel.txt
- 00_25_z18.0_33channel.txt
- 00_25_z18.0_34channel.txt
- 00_25_z18.0_35channel.txt
- 00_25_z18.0_36channel.txt
- 00_25_z18.0_37channel.txt
- 00_25_z18.0_38channel.txt
- 00_25_z18.0_39channel.txt
- 00_25_z18.0_3channel.txt
- 00_25_z18.0_40channel.txt
- 00_25_z18.0_4channel.txt
- 00_25_z18.0_5channel.txt
- 00_25_z18.0_6channel.txt
- 00_25_z18.0_7channel.txt
- 00_25_z18.0_8channel.txt
- 00_25_z18.0_9channel.txt
- 01_25_z20.0_20channel.txt
- 01_25_z20.0_31channel.txt
- 01_25_z20.0_32channel.txt
- 01_25_z20.0_38channel.txt
- 01_25_z20.0_39channel.txt
- 01_9_z29.5_20channel.txt
- 01_9_z29.5_31channel.txt
- 01_9_z29.5_32channel.txt
- 01_9_z29.5_38channel.txt
- 01_9_z29.5_39channel.txt
- 01_9_z29.5_3channel.txt
- 01_9_z29.5_4channel.txt
- 01_9_z29.5_5channel.txt
- data_description.txt
