# Supplementary material for: A Novel Classification Method for Flutter Signals Based on the CNN and STFT
Source: Hindawi journal article supplement (doi:10.1155/2019/9375437), 2019-04-09
Supplement: f1 [file 9375437.f1.zip › 00_25_z15.0_12channel.txt]

  -6.0000000e-03
  -8.8800000e-03
  -7.0200000e-03
  -5.8700000e-03
  -6.8800000e-03
  -6.0900000e-03
  -6.5500000e-03
  -4.5000000e-03
  -3.6500000e-03
  -7.6500000e-03
  -7.6800000e-03
  -5.4300000e-03
  -2.2500000e-03
  -4.3300000e-03
  -5.2400000e-03
  -3.9800000e-03
  -7.1000000e-03
  -9.6000000e-03
  -8.0600000e-03
  -5.7600000e-03
  -7.0200000e-03
  -8.1200000e-03
  -8.9900000e-03
  -1.0090000e-02
  -6.9100000e-03
  -7.9200000e-03
  -7.0700000e-03
  -7.6500000e-03
  -8.1200000e-03
  -1.0670000e-02
  -7.3800000e-03
  -7.0700000e-03
  -6.7200000e-03
  -6.5500000e-03
  -4.7700000e-03
  -3.1800000e-03
  -5.0200000e-03
  -4.1400000e-03
  -4.5000000e-03
  -6.3100000e-03
  -6.7700000e-03
  -9.1900000e-03
  -6.9100000e-03
  -6.2500000e-03
  -7.8700000e-03
  -8.0900000e-03
  -7.5400000e-03
  -7.5400000e-03
  -8.0300000e-03
  -7.7900000e-03
  -6.9900000e-03
  -6.9400000e-03
  -6.2500000e-03
  -3.8900000e-03
  -4.9600000e-03
  -3.8100000e-03
  -4.3600000e-03
  -4.3300000e-03
  -2.1700000e-03
  -2.9600000e-03
  -4.9900000e-03
  -6.0600000e-03
  -4.6600000e-03
  -5.0700000e-03
  -5.9500000e-03
  -6.0900000e-03
  -3.7300000e-03
  -4.1700000e-03
  -4.8500000e-03
  -4.6300000e-03
  -7.8400000e-03
  -6.9900000e-03
  -6.9600000e-03
  -9.1900000e-03
  -6.1700000e-03
  -5.8900000e-03
  -4.8000000e-03
  -6.5000000e-03
  -5.2600000e-03
  -2.9300000e-03
  -4.0900000e-03
  -6.7400000e-03
  -6.0900000e-03
  -5.3200000e-03
  -4.7400000e-03
  -3.7300000e-03
  -3.8400000e-03
  -3.6700000e-03
  -3.3700000e-03
  -7.7300000e-03
  -2.6000000e-03
  -3.7600000e-03
  -3.8400000e-03
  -6.3100000e-03
  -7.5700000e-03
  -5.6800000e-03
  -7.2900000e-03
  -7.2100000e-03
  -3.2100000e-03
  -4.8300000e-03
  -4.2800000e-03
  -6.8800000e-03
  -8.1200000e-03
  -7.3200000e-03
  -8.5500000e-03
  -7.6500000e-03
  -6.3900000e-03
  -5.1000000e-03
  -3.2600000e-03
  -5.3200000e-03
  -4.5200000e-03
  -3.9800000e-03
  -5.9800000e-03
  -2.6900000e-03
  -3.8400000e-03
  -6.0300000e-03
  -5.2100000e-03
  -6.2000000e-03
  -2.7400000e-03
  -3.7600000e-03
  -4.9400000e-03
  -2.5200000e-03
  -6.3100000e-03
  -6.4700000e-03
  -6.5300000e-03
  -5.7600000e-03
  -4.7200000e-03
  -8.3900000e-03
  -1.0340000e-02
  -6.2200000e-03
  -4.2800000e-03
  -4.6300000e-03
  -7.7300000e-03
  -8.2800000e-03
  -6.8300000e-03
  -9.2100000e-03
  -7.4300000e-03
  -4.3000000e-03
  -5.0200000e-03
  -5.7600000e-03
  -1.0010000e-02
  -6.6400000e-03
  -6.6000000e-04
  -4.6900000e-03
  -5.9500000e-03
  -6.0300000e-03
  -7.7000000e-03
  -6.8800000e-03
  -9.1000000e-03
  -5.6200000e-03
  -3.5100000e-03
  -7.7000000e-03
  -9.1300000e-03
  -8.6400000e-03
  -4.3000000e-03
  -4.9600000e-03
  -7.9200000e-03
  -6.6600000e-03
  -5.7900000e-03
  -8.8600000e-03
  -7.7300000e-03
  -3.0200000e-03
  -4.1000000e-04
  -5.3700000e-03
  -8.3400000e-03
  -4.5200000e-03
  -2.8000000e-03
  -4.6300000e-03
  -4.6600000e-03
  -4.6300000e-03
  -6.7700000e-03
  -7.5400000e-03
  -6.5300000e-03
  -6.6100000e-03
  -4.4400000e-03
  -6.9100000e-03
  -9.7100000e-03
  -9.2400000e-03
  -8.0300000e-03
  -7.2100000e-03
  -8.5500000e-03
  -8.2000000e-03
  -8.0900000e-03
  -7.7600000e-03
  -5.8400000e-03
  -5.3200000e-03
  -6.6100000e-03
  -6.0600000e-03
  -3.5400000e-03
  -5.2600000e-03
  -5.7600000e-03
  -2.4400000e-03
  -3.4800000e-03
  -6.3900000e-03
  -7.1300000e-03
  -2.4700000e-03
  -2.2200000e-03
  -7.5900000e-03
  -6.4400000e-03
  -6.2200000e-03
  -5.0400000e-03
  -6.4200000e-03
  -8.0600000e-03
  -5.4600000e-03
  -6.0000000e-03
  -7.5400000e-03
  -5.7000000e-03
  -4.9400000e-03
  -4.7700000e-03
  -7.2400000e-03
  -7.9800000e-03
  -4.2200000e-03
  -6.6400000e-03
  -5.4300000e-03
  -4.0600000e-03
  -2.9600000e-03
  -4.1700000e-03
  -2.9900000e-03
  -3.6000000e-04
  -1.7800000e-03
  -3.5100000e-03
  -5.2400000e-03
  -1.7800000e-03
  -2.8500000e-03
  -3.1500000e-03
  -2.8500000e-03
  -3.4500000e-03
  -3.2100000e-03
  -5.6200000e-03
  -6.3100000e-03
  -2.4700000e-03
  -5.1000000e-03
  -6.9600000e-03
  -6.0000000e-03
  -7.4000000e-03
  -6.2000000e-03
  -8.5300000e-03
  -5.3200000e-03
  -3.3500000e-03
  -4.4100000e-03
  -2.8800000e-03
  -5.0200000e-03
  -4.9400000e-03
  -5.4800000e-03
  -4.5500000e-03
  -5.2600000e-03
  -4.8000000e-03
  -4.3000000e-03
  -4.0300000e-03
  -2.3900000e-03
  -2.4100000e-03
  -2.9600000e-03
  -4.0000000e-03
  -6.7400000e-03
  -6.1400000e-03
  -6.3900000e-03
  -6.4200000e-03
  -5.0200000e-03
  -6.6600000e-03
  -4.6300000e-03
  -3.1300000e-03
  -5.0400000e-03
  -2.6600000e-03
  -5.1500000e-03
  -3.0700000e-03
  -3.3500000e-03
  -5.8400000e-03
  -5.2100000e-03
  -6.8800000e-03
  -3.8900000e-03
  -1.1800000e-03
  -1.1000000e-04
  -2.3300000e-03
  -5.1300000e-03
  -5.0200000e-03
  -2.9100000e-03
  -4.4100000e-03
  -3.1500000e-03
  -5.9800000e-03
  -8.7200000e-03
  -7.8400000e-03
  -7.6500000e-03
  -3.6700000e-03
  -2.4400000e-03
  -7.6200000e-03
  -4.6100000e-03
  -7.9800000e-03
  -6.3100000e-03
  -7.1300000e-03
  -7.5100000e-03
  -3.9200000e-03
  -4.5500000e-03
  -5.4000000e-03
  -3.0400000e-03
  -3.8900000e-03
  -4.0000000e-03
  -4.1900000e-03
  -5.7900000e-03
  -2.6300000e-03
  -6.0300000e-03
  -6.8500000e-03
  -6.8300000e-03
  -5.5400000e-03
  -1.1200000e-03
  -3.8400000e-03
  -4.6900000e-03
  -4.3000000e-03
  -7.2100000e-03
  -7.5100000e-03
  -4.8300000e-03
  -4.7700000e-03
  -5.5400000e-03
  -7.7900000e-03
  -8.7200000e-03
  -5.3500000e-03
  -4.7200000e-03
  -1.9500000e-03
  -2.7400000e-03
  -3.3700000e-03
  -3.8100000e-03
  -7.7300000e-03
  -7.0700000e-03
  -2.1400000e-03
  -1.9200000e-03
  -3.5100000e-03
  -2.2500000e-03
  -2.6000000e-03
  -3.5100000e-03
  -6.9400000e-03
  -4.2800000e-03
  -2.0800000e-03
  -4.6100000e-03
  -5.5400000e-03
  -6.6100000e-03
  -5.8100000e-03
  -4.3300000e-03
  -5.0400000e-03
  -4.0900000e-03
  -4.8500000e-03
  -6.1400000e-03
  -6.2000000e-03
  -5.1000000e-03
  -2.9300000e-03
  -6.9900000e-03
  -6.2000000e-03
  -4.7700000e-03
  -3.3500000e-03
  -4.4700000e-03
  -4.8000000e-03
  -3.2900000e-03
  -4.8300000e-03
  -7.1000000e-03
  -3.9200000e-03
  -4.4400000e-03
  -5.0400000e-03
  -4.9100000e-03
  -3.8700000e-03
  -1.2100000e-03
  -3.7800000e-03
  -4.3000000e-03
  -2.7100000e-03
  -3.6500000e-03
  -5.8900000e-03
  -7.0700000e-03
  -5.0400000e-03
  -4.3000000e-03
  -6.2800000e-03
  -5.0400000e-03
  -1.5600000e-03
  -4.1400000e-03
  -8.0300000e-03
  -6.8800000e-03
  -2.8800000e-03
  -4.2500000e-03
  -5.1300000e-03
  -5.8700000e-03
  -1.8400000e-03
  -2.9600000e-03
  -5.4800000e-03
  -4.1900000e-03
  -3.5100000e-03
  -3.9800000e-03
  -5.4300000e-03
  -6.4700000e-03
  -2.0000000e-03
  -5.5400000e-03
  -5.9500000e-03
  -4.9400000e-03
  -6.1100000e-03
  -3.1300000e-03
  -4.0300000e-03
  -4.4100000e-03
  -4.8800000e-03
  -8.9400000e-03
  -7.5400000e-03
  -6.0900000e-03
  -7.0200000e-03
  -6.4200000e-03
  -4.6600000e-03
  -5.0200000e-03
  -5.6800000e-03
  -6.0300000e-03
  -3.8700000e-03
  -6.3100000e-03
  -7.0500000e-03
  -4.8000000e-03
  -3.2400000e-03
  -5.5900000e-03
  -4.5500000e-03
  -2.6300000e-03
  -3.2100000e-03
  -4.9600000e-03
  -6.0000000e-03
  -5.6200000e-03
  -6.7200000e-03
  -5.7000000e-03
  -5.9200000e-03
  -3.6700000e-03
  -7.2400000e-03
  -7.2400000e-03
  -6.6900000e-03
  -3.7800000e-03
  -2.3600000e-03
  -5.9500000e-03
  -4.4400000e-03
  -4.3300000e-03
  -7.1800000e-03
  -4.7700000e-03
  -1.1200000e-03
  -1.2300000e-03
  -5.7300000e-03
  -7.1000000e-03
  -4.3600000e-03
  -4.2200000e-03
  -7.6500000e-03
  -4.0600000e-03
  -6.1100000e-03
  -5.5700000e-03
  -1.0390000e-02
  -7.7900000e-03
  -1.4800000e-03
  -4.7700000e-03
  -6.2500000e-03
  -7.3500000e-03
  -5.5700000e-03
  -8.0100000e-03
  -7.8700000e-03
  -3.4000000e-03
  -4.6100000e-03
  -6.7700000e-03
  -8.6400000e-03
  -6.6100000e-03
  -3.7000000e-03
  -4.0300000e-03
  -4.6900000e-03
  -5.2100000e-03
  -6.6100000e-03
  -7.1800000e-03
  -5.8700000e-03
  -3.8900000e-03
  -2.1700000e-03
  -3.2900000e-03
  -2.1100000e-03
  -4.9400000e-03
  -5.7600000e-03
  -5.3700000e-03
  -2.1700000e-03
  -4.1100000e-03
  -5.6200000e-03
  -6.7400000e-03
  -5.3500000e-03
  -5.5700000e-03
  -6.2200000e-03
  -4.9100000e-03
  -5.8400000e-03
  -5.8100000e-03
  -8.0300000e-03
  -4.9100000e-03
  -5.1500000e-03
  -6.7700000e-03
  -5.9500000e-03
  -3.9800000e-03
  -3.4300000e-03
  -4.7400000e-03
  -6.2800000e-03
  -5.2600000e-03
  -3.2600000e-03
  -6.0900000e-03
  -7.5100000e-03
  -5.0700000e-03
  -3.1800000e-03
  -3.2400000e-03
  -5.8900000e-03
  -3.7600000e-03
  -2.5500000e-03
  -4.9600000e-03
  -5.5700000e-03
  -5.1500000e-03
  -5.2400000e-03
  -6.4700000e-03
  -7.3500000e-03
  -6.0300000e-03
  -5.1000000e-03
  -5.1500000e-03
  -7.0700000e-03
  -7.8700000e-03
  -6.4700000e-03
  -3.9500000e-03
  -7.7600000e-03
  -7.3500000e-03
  -5.6800000e-03
  -5.1800000e-03
  -4.4400000e-03
  -4.5000000e-03
  -3.2900000e-03
  -4.5200000e-03
  -4.3300000e-03
  -5.2600000e-03
  -6.3100000e-03
  -4.1100000e-03
  -6.2800000e-03
  -7.4900000e-03
  -6.0600000e-03
  -3.0400000e-03
  -4.9400000e-03
  -6.1700000e-03
  -4.0900000e-03
  -3.6200000e-03
  -4.9900000e-03
  -5.1800000e-03
  -5.2600000e-03
  -1.4500000e-03
  -4.0900000e-03
  -3.8400000e-03
  -4.4400000e-03
  -2.7700000e-03
  -2.9300000e-03
  -5.6500000e-03
  -6.6900000e-03
  -5.4000000e-03
  -5.9500000e-03
  -6.8000000e-03
  -8.1200000e-03
  -4.8800000e-03
  -5.7600000e-03
  -6.4200000e-03
  -5.3700000e-03
  -3.8400000e-03
  -6.0900000e-03
  -5.8900000e-03
  -6.9600000e-03
  -5.3700000e-03
  -6.3300000e-03
  -4.9400000e-03
  -5.1000000e-03
  -6.0900000e-03
  -6.0900000e-03
  -5.8900000e-03
  -4.9400000e-03
  -5.3500000e-03
  -5.7900000e-03
  -6.6600000e-03
  -6.5800000e-03
  -5.0700000e-03
  -6.3300000e-03
  -1.4500000e-03
  -4.2800000e-03
  -5.4600000e-03
  -4.4700000e-03
  -3.8100000e-03
  -3.1000000e-03
  -4.2500000e-03
  -6.4200000e-03
  -5.0400000e-03
  -7.6800000e-03
  -6.7200000e-03
  -3.4500000e-03
  -6.6600000e-03
  -5.0700000e-03
  -8.0300000e-03
  -7.2700000e-03
  -2.5200000e-03
  -7.9200000e-03
  -7.7900000e-03
  -5.4600000e-03
  -3.4300000e-03
  -4.6100000e-03
  -6.2000000e-03
  -4.3300000e-03
  -3.6700000e-03
  -6.2500000e-03
  -3.9500000e-03
  -4.3300000e-03
  -3.6200000e-03
  -3.0400000e-03
  -5.0700000e-03
  -3.3500000e-03
  -2.8000000e-03
  -4.1100000e-03
  -1.9500000e-03
  -4.3900000e-03
  -3.0700000e-03
  -2.6900000e-03
  -4.1900000e-03
  -4.7200000e-03
  -7.7900000e-03
  -7.3200000e-03
  -6.0600000e-03
  -4.9100000e-03
  -7.4300000e-03
  -6.0900000e-03
  -5.2400000e-03
  -9.2900000e-03
  -9.2100000e-03
  -7.5700000e-03
  -5.4800000e-03
  -7.2900000e-03
  -4.7200000e-03
  -3.2100000e-03
  -5.1500000e-03
  -5.3700000e-03
  -2.6900000e-03
  -2.4700000e-03
  -2.2200000e-03
  -1.6700000e-03
  -2.2200000e-03
  -4.5500000e-03
  -6.9400000e-03
  -5.6800000e-03
  -4.6100000e-03
  -4.2500000e-03
  -6.8500000e-03
  -7.7000000e-03
  -5.3200000e-03
  -3.3200000e-03
  -6.0600000e-03
  -5.5400000e-03
  -2.9600000e-03
  -3.9800000e-03
  -7.5900000e-03
  -6.0600000e-03
  -2.8200000e-03
  -3.5100000e-03
  -4.6100000e-03
  -4.9600000e-03
  -1.5400000e-03
  -6.7700000e-03
  -8.0600000e-03
  -6.6900000e-03
  -4.7400000e-03
  -4.4700000e-03
  -8.0900000e-03
  -6.2200000e-03
  -4.1400000e-03
  -5.0200000e-03
  -5.3200000e-03
  -5.8900000e-03
  -2.9100000e-03
  -5.3200000e-03
  -7.7900000e-03
  -6.7200000e-03
  -6.1400000e-03
  -4.8800000e-03
  -5.6500000e-03
  -5.0200000e-03
  -7.0700000e-03
  -7.1800000e-03
  -4.3900000e-03
  -3.8400000e-03
  -2.9300000e-03
  -4.6900000e-03
  -5.6200000e-03
  -6.1400000e-03
  -4.9900000e-03
  -3.8900000e-03
  -4.0900000e-03
  -1.2600000e-03
  -2.6900000e-03
  -4.3000000e-03
  -2.8500000e-03
  -4.7200000e-03
  -5.8100000e-03
  -7.4300000e-03
  -6.7700000e-03
  -3.8900000e-03
  -5.9200000e-03
  -7.6200000e-03
  -6.7200000e-03
  -6.2500000e-03
  -2.7100000e-03
  -4.3900000e-03
  -3.6200000e-03
  -4.1400000e-03
  -7.5700000e-03
  -3.0200000e-03
  -4.1100000e-03
  -5.2100000e-03
  -3.6700000e-03
  -4.6300000e-03
  -1.7800000e-03
  -5.2600000e-03
  -4.6100000e-03
  -2.5200000e-03
  -5.5400000e-03
  -3.0400000e-03
  -3.9800000e-03
  -4.9900000e-03
  -1.4500000e-03
  -5.7600000e-03
  -3.3700000e-03
  -3.5600000e-03
  -3.9200000e-03
  -5.7300000e-03
  -7.6200000e-03
  -5.5900000e-03
  -4.4400000e-03
  -9.1300000e-03
  -6.6100000e-03
  -6.3900000e-03
  -6.9900000e-03
  -6.1100000e-03
  -5.7300000e-03
  -3.5900000e-03
  -3.2400000e-03
  -6.1700000e-03
  -3.0700000e-03
  -4.5800000e-03
  -5.5900000e-03
  -5.5900000e-03
  -4.2500000e-03
  -3.8000000e-04
  -1.6000000e-04
  -4.3300000e-03
  -5.3200000e-03
  -6.8000000e-03
  -4.9900000e-03
  -4.6100000e-03
  -5.4300000e-03
  -3.7800000e-03
  -4.9400000e-03
  -8.3400000e-03
  -4.5200000e-03
  -3.7600000e-03
  -1.1200000e-03
  -3.2600000e-03
  -6.3600000e-03
  -4.5000000e-03
  -4.7400000e-03
  -3.8400000e-03
  -2.4100000e-03
  -3.7300000e-03
  -3.0400000e-03
  -7.1000000e-03
  -8.0300000e-03
  -4.6300000e-03
  -1.8600000e-03
  -2.1900000e-03
  -5.9200000e-03
  -7.8400000e-03
  -6.3900000e-03
  -5.2400000e-03
  -4.7700000e-03
  -1.4300000e-03
  -1.7300000e-03
  -2.6900000e-03
  -5.6200000e-03
  -7.0200000e-03
  -3.8700000e-03
  -4.8800000e-03
  -6.6600000e-03
  -7.9800000e-03
  -6.9100000e-03
  -3.6200000e-03
  -3.8400000e-03
  -5.1300000e-03
  -4.0300000e-03
  -4.0000000e-03
  -5.7300000e-03
  -4.9900000e-03
  -3.1000000e-03
   5.0000000e-05
  -2.7700000e-03
  -4.6300000e-03
  -6.3100000e-03
  -3.9800000e-03
  -4.1400000e-03
  -5.7900000e-03
  -4.6600000e-03
  -4.1100000e-03
  -6.5000000e-03
  -8.3900000e-03
  -6.2800000e-03
  -4.5800000e-03
  -3.4500000e-03
  -5.8700000e-03
  -4.9400000e-03
  -5.0200000e-03
  -3.8700000e-03
  -3.6200000e-03
  -4.1900000e-03
  -2.8000000e-03
  -5.5400000e-03
  -5.7000000e-03
  -3.2100000e-03
  -2.7400000e-03
  -1.8400000e-03
  -5.3700000e-03
  -5.5400000e-03
  -3.2400000e-03
  -7.7300000e-03
  -5.8900000e-03
  -6.6900000e-03
  -1.4800000e-03
  -2.1700000e-03
  -6.1100000e-03
  -4.5500000e-03
  -4.4400000e-03
  -3.0400000e-03
  -5.1500000e-03
  -4.0300000e-03
  -5.2600000e-03
  -8.8600000e-03
  -1.0120000e-02
  -5.1500000e-03
  -4.6900000e-03
  -4.2200000e-03
  -8.9100000e-03
  -1.1350000e-02
  -7.1300000e-03
  -5.2100000e-03
  -1.5600000e-03
  -2.1700000e-03
  -2.9300000e-03
  -5.5900000e-03
  -4.7700000e-03
  -1.7800000e-03
   7.4000000e-04
  -5.0000000e-05
  -3.3200000e-03
  -4.9900000e-03
  -8.1400000e-03
  -5.7000000e-03
  -5.1800000e-03
  -4.5200000e-03
  -3.7800000e-03
  -4.9100000e-03
  -5.2900000e-03
  -4.6300000e-03
  -6.5500000e-03
  -1.1500000e-03
  -4.8300000e-03
  -7.2400000e-03
  -7.2400000e-03
  -7.8100000e-03
  -5.1000000e-03
  -3.8700000e-03
  -2.1400000e-03
  -3.8100000e-03
  -5.8100000e-03
  -6.9900000e-03
  -5.6800000e-03
  -3.3700000e-03
  -1.4000000e-03
  -3.9200000e-03
  -4.8500000e-03
  -3.1800000e-03
  -5.8700000e-03
  -3.0400000e-03
  -2.3600000e-03
  -3.5400000e-03
  -6.7200000e-03
  -6.0000000e-03
  -6.5000000e-03
  -6.1400000e-03
  -6.3600000e-03
  -4.1400000e-03
  -6.3900000e-03
  -7.7600000e-03
  -6.2000000e-03
  -8.0100000e-03
  -6.5000000e-03
  -4.3900000e-03
  -5.2400000e-03
  -4.1900000e-03
  -6.6100000e-03
  -7.4600000e-03
  -4.3300000e-03
  -1.4300000e-03
  -2.9600000e-03
  -3.1800000e-03
  -3.5900000e-03
  -3.7300000e-03
  -8.2300000e-03
  -7.0200000e-03
  -4.0000000e-03
  -4.3900000e-03
  -6.8300000e-03
  -5.3200000e-03
  -3.8400000e-03
  -2.4400000e-03
  -4.6100000e-03
  -4.8300000e-03
  -2.5000000e-03
  -6.2000000e-03
  -6.4700000e-03
  -1.4500000e-03
  -1.5400000e-03
  -1.2900000e-03
  -6.5300000e-03
  -6.9400000e-03
  -4.1100000e-03
  -7.6200000e-03
  -4.4400000e-03
  -4.3000000e-03
  -3.4300000e-03
  -5.3200000e-03
  -6.8500000e-03
  -4.9100000e-03
  -4.7400000e-03
  -5.1800000e-03
  -3.2400000e-03
  -4.1700000e-03
  -6.7700000e-03
  -5.0700000e-03
  -5.9500000e-03
  -5.6200000e-03
  -5.2900000e-03
  -6.4400000e-03
  -6.6400000e-03
  -6.1100000e-03
  -7.8100000e-03
  -3.1300000e-03
  -3.1800000e-03
  -7.3200000e-03
  -7.1300000e-03
  -7.0500000e-03
  -2.9600000e-03
  -5.3200000e-03
  -5.3200000e-03
  -1.6700000e-03
  -3.8100000e-03
  -4.8500000e-03
  -5.3500000e-03
  -4.8000000e-03
  -2.6900000e-03
  -7.2900000e-03
  -4.8500000e-03
  -2.5800000e-03
  -4.7700000e-03
  -5.6200000e-03
  -5.4000000e-03
  -4.6600000e-03
  -5.7900000e-03
  -8.8800000e-03
  -4.9600000e-03
  -4.5200000e-03
  -4.6100000e-03
  -4.4700000e-03
  -5.5700000e-03
  -6.1100000e-03
  -5.6500000e-03
  -5.7000000e-03
  -1.8100000e-03
  -4.1400000e-03
  -4.4700000e-03
  -5.5700000e-03
  -2.6600000e-03
  -1.1000000e-03
  -1.7000000e-03
  -4.8500000e-03
  -3.0200000e-03
  -4.0600000e-03
  -3.4000000e-03
  -2.2500000e-03
  -2.5800000e-03
  -3.6200000e-03
  -5.7300000e-03
  -7.9000000e-03
  -5.7900000e-03
  -6.6900000e-03
  -4.4700000e-03
  -5.5900000e-03
  -6.5000000e-03
  -5.4300000e-03
  -5.7900000e-03
  -5.9500000e-03
  -5.9500000e-03
  -5.8700000e-03
  -3.5600000e-03
  -4.6900000e-03
  -4.0900000e-03
  -3.2900000e-03
  -4.1400000e-03
  -4.1400000e-03
  -3.1300000e-03
  -5.7300000e-03
  -2.9600000e-03
  -4.5200000e-03
  -3.7600000e-03
  -1.2600000e-03
  -1.4500000e-03
  -2.8800000e-03
  -6.9400000e-03
  -6.6600000e-03
  -6.2000000e-03
  -5.8100000e-03
  -5.7900000e-03
  -1.8400000e-03
  -4.6900000e-03
  -5.7000000e-03
  -4.4400000e-03
  -6.4400000e-03
  -3.3700000e-03
  -3.9500000e-03
  -3.5100000e-03
  -4.2200000e-03
  -7.7600000e-03
  -6.3600000e-03
  -6.6400000e-03
  -5.4600000e-03
  -5.2600000e-03
  -5.9500000e-03
  -4.4700000e-03
  -9.6000000e-04
  -6.2500000e-03
  -4.9900000e-03
  -6.1100000e-03
  -4.7700000e-03
  -4.9100000e-03
  -7.4000000e-03
  -3.1800000e-03
  -5.7900000e-03
  -7.7300000e-03
  -4.0600000e-03
  -5.7300000e-03
  -3.2900000e-03
  -6.3100000e-03
  -6.5500000e-03
  -6.5800000e-03
  -6.4200000e-03
  -3.7000000e-03
  -6.0900000e-03
  -3.3200000e-03
  -5.2600000e-03
  -6.9400000e-03
  -5.2600000e-03
  -5.8100000e-03
  -4.0600000e-03
  -6.4400000e-03
  -4.6600000e-03
  -6.1400000e-03
  -7.1600000e-03
  -4.9900000e-03
  -3.4300000e-03
  -2.5200000e-03
  -4.3600000e-03
  -3.7600000e-03
  -4.5800000e-03
  -7.1800000e-03
  -6.7700000e-03
  -5.9800000e-03
  -5.6200000e-03
  -6.0000000e-03
  -6.0300000e-03
  -6.6400000e-03
  -6.1700000e-03
  -4.9600000e-03
  -4.9400000e-03
  -5.3700000e-03
  -3.1300000e-03
  -4.8800000e-03
  -5.2100000e-03
  -5.3700000e-03
  -5.2100000e-03
  -4.5800000e-03
  -6.1400000e-03
  -3.4300000e-03
  -4.4700000e-03
  -5.9500000e-03
  -3.9800000e-03
  -4.6900000e-03
  -6.5300000e-03
  -7.7300000e-03
  -5.5900000e-03
  -6.2000000e-03
  -7.5400000e-03
  -6.9100000e-03
  -5.8900000e-03
  -7.8400000e-03
  -6.6600000e-03
  -6.4400000e-03
  -5.0400000e-03
  -2.5500000e-03
  -4.3600000e-03
  -7.1800000e-03
  -4.0900000e-03
  -3.8100000e-03
  -3.3200000e-03
  -2.6600000e-03
  -3.7800000e-03
  -3.5900000e-03
  -8.3900000e-03
  -5.4300000e-03
  -2.0800000e-03
  -3.8400000e-03
  -3.4300000e-03
  -8.5800000e-03
  -6.3300000e-03
  -3.2900000e-03
  -2.1700000e-03
  -1.8400000e-03
  -5.4000000e-03
  -6.9400000e-03
  -4.0300000e-03
  -6.8300000e-03
  -4.4700000e-03
  -4.4100000e-03
  -7.6500000e-03
  -6.4400000e-03
  -7.5400000e-03
  -4.5200000e-03
  -2.6300000e-03
  -5.3500000e-03
  -3.6200000e-03
  -6.6100000e-03
  -3.3700000e-03
  -4.1700000e-03
  -4.6300000e-03
  -3.4000000e-03
  -4.9600000e-03
  -6.9600000e-03
  -6.1100000e-03
  -4.6100000e-03
  -5.4000000e-03
  -4.4100000e-03
  -5.5400000e-03
  -5.2400000e-03
  -6.6900000e-03
  -8.2300000e-03
  -5.1000000e-03
  -3.0700000e-03
  -3.5400000e-03
  -3.7800000e-03
  -5.3500000e-03
  -5.2600000e-03
  -4.6900000e-03
  -6.5800000e-03
  -3.1000000e-03
  -4.3600000e-03
  -5.5400000e-03
  -5.4800000e-03
  -6.8300000e-03
  -4.4700000e-03
  -1.3700000e-03
  -4.2500000e-03
  -3.2900000e-03
  -3.7000000e-03
  -6.7400000e-03
  -4.6900000e-03
  -7.1800000e-03
  -4.6900000e-03
  -2.8800000e-03
  -5.5100000e-03
  -2.1100000e-03
  -6.3100000e-03
  -4.1900000e-03
  -4.1900000e-03
  -6.7700000e-03
  -6.0000000e-03
  -6.2800000e-03
  -7.2900000e-03
  -4.3300000e-03
  -5.0200000e-03
  -4.2500000e-03
  -4.1700000e-03
  -7.5100000e-03
  -2.8500000e-03
  -1.7800000e-03
  -2.3900000e-03
  -1.8100000e-03
  -5.5100000e-03
  -5.9500000e-03
  -6.0000000e-03
  -5.4800000e-03
  -2.6900000e-03
  -1.9700000e-03
  -8.9400000e-03
  -7.7300000e-03
  -7.7000000e-03
  -5.4300000e-03
  -5.4000000e-03
  -8.4400000e-03
  -6.5500000e-03
  -8.3600000e-03
  -7.2900000e-03
  -5.8400000e-03
  -3.2600000e-03
  -1.0400000e-03
  -3.7800000e-03
  -9.4300000e-03
  -6.8000000e-03
  -5.3200000e-03
  -6.7200000e-03
  -3.7600000e-03
  -4.0000000e-03
  -4.0300000e-03
  -5.2900000e-03
  -6.2500000e-03
  -2.1100000e-03
  -2.8200000e-03
  -3.8400000e-03
  -5.7600000e-03
  -6.4200000e-03
  -5.1500000e-03
  -4.5000000e-03
  -4.5200000e-03
  -1.9500000e-03
  -2.5500000e-03
  -6.0900000e-03
  -5.3500000e-03
  -5.9500000e-03
  -5.3200000e-03
  -3.7600000e-03
  -5.6500000e-03
  -5.9800000e-03
  -8.0300000e-03
  -7.7300000e-03
  -1.9500000e-03
  -4.9600000e-03
  -1.4800000e-03
  -2.3900000e-03
  -2.8800000e-03
  -4.9400000e-03
  -1.0230000e-02
  -2.4700000e-03
  -3.5400000e-03
  -4.7700000e-03
  -8.3400000e-03
  -5.4600000e-03
  -4.8000000e-03
  -6.5300000e-03
  -6.2000000e-03
  -4.5500000e-03
  -6.4200000e-03
  -8.8300000e-03
  -7.2900000e-03
  -4.8000000e-03
  -2.9900000e-03
  -5.0400000e-03
  -2.0000000e-03
  -2.8500000e-03
  -4.4100000e-03
  -5.3700000e-03
  -3.1800000e-03
   3.0000000e-05
  -5.3500000e-03
  -6.6400000e-03
  -4.5800000e-03
  -3.5400000e-03
  -5.4800000e-03
  -4.6900000e-03
  -2.0600000e-03
  -3.8100000e-03
  -7.2900000e-03
  -3.8700000e-03
  -1.7500000e-03
  -3.6700000e-03
  -6.0000000e-03
  -7.8400000e-03
  -2.3300000e-03
  -6.8500000e-03
  -6.0300000e-03
  -2.4100000e-03
  -4.8500000e-03
  -5.0200000e-03
  -7.8700000e-03
  -5.2400000e-03
  -3.3200000e-03
  -7.7300000e-03
  -6.3300000e-03
  -4.3300000e-03
  -1.0400000e-03
  -6.1400000e-03
  -7.5400000e-03
  -1.9500000e-03
  -2.3300000e-03
  -4.5500000e-03
  -4.0000000e-03
  -5.1000000e-03
  -6.1700000e-03
  -6.7700000e-03
  -4.4100000e-03
  -4.8300000e-03
  -5.0700000e-03
  -5.8100000e-03
  -7.7300000e-03
  -6.1400000e-03
  -3.3500000e-03
  -4.0600000e-03
  -4.2500000e-03
  -6.9600000e-03
  -7.2400000e-03
  -7.2100000e-03
  -4.4100000e-03
  -3.3700000e-03
  -5.9800000e-03
  -4.1900000e-03
  -5.5100000e-03
  -8.1200000e-03
  -4.9600000e-03
  -3.9800000e-03
  -5.1300000e-03
  -7.5100000e-03
  -7.2400000e-03
  -2.7000000e-04
  -3.2600000e-03
  -4.3300000e-03
  -4.0000000e-03
  -4.8300000e-03
  -4.1900000e-03
  -5.4800000e-03
  -4.1400000e-03
  -1.9200000e-03
  -6.2500000e-03
  -7.3200000e-03
  -6.0300000e-03
  -1.9500000e-03
  -2.8500000e-03
  -5.8900000e-03
  -4.1700000e-03
  -3.5900000e-03
  -5.4000000e-03
  -4.6300000e-03
  -2.4100000e-03
  -2.2800000e-03
  -7.4900000e-03
  -6.7200000e-03
  -4.9600000e-03
  -3.6500000e-03
  -4.8300000e-03
  -2.9300000e-03
  -3.5400000e-03
  -7.4000000e-03
  -8.7500000e-03
  -7.6200000e-03
  -3.2100000e-03
  -3.2900000e-03
  -4.5500000e-03
  -5.0200000e-03
  -5.2100000e-03
  -6.9400000e-03
  -6.9900000e-03
  -1.7500000e-03
  -3.0200000e-03
  -6.1100000e-03
  -8.9700000e-03
  -4.1700000e-03
   3.0000000e-05
  -3.4500000e-03
  -2.5000000e-03
  -3.5100000e-03
  -3.7000000e-03
  -5.4000000e-03
  -3.2400000e-03
  -1.0400000e-03
  -2.7100000e-03
  -7.0500000e-03
  -6.8800000e-03
  -6.1400000e-03
  -3.9800000e-03
  -5.5700000e-03
  -7.7300000e-03
  -4.0900000e-03
  -6.5500000e-03
  -6.8000000e-03
  -7.5700000e-03
  -6.6100000e-03
  -6.0000000e-03
  -6.2200000e-03
  -4.5200000e-03
  -4.5200000e-03
  -4.4700000e-03
  -3.1800000e-03
  -2.8800000e-03
  -3.9200000e-03
  -3.2400000e-03
  -6.0900000e-03
  -4.8000000e-03
  -3.7000000e-03
  -5.0200000e-03
  -2.8200000e-03
  -4.7700000e-03
  -5.4000000e-03
  -8.6600000e-03
  -5.4300000e-03
  -3.6700000e-03
  -3.3200000e-03
  -5.7300000e-03
  -5.5400000e-03
  -5.3200000e-03
  -5.6200000e-03
  -5.4000000e-03
  -4.0900000e-03
  -4.2200000e-03
  -5.7000000e-03
  -7.6500000e-03
  -5.8900000e-03
  -5.5900000e-03
  -6.0300000e-03
  -5.8100000e-03
  -5.5700000e-03
  -6.5300000e-03
  -4.9600000e-03
  -7.2400000e-03
  -4.7700000e-03
  -3.8900000e-03
  -3.9500000e-03
  -3.2600000e-03
  -6.4200000e-03
  -5.7900000e-03
  -6.0000000e-03
  -4.6900000e-03
  -3.3700000e-03
  -6.8300000e-03
  -5.2100000e-03
  -2.4400000e-03
  -5.1500000e-03
  -5.8900000e-03
  -4.1400000e-03
  -2.9600000e-03
  -3.0400000e-03
  -7.0200000e-03
  -4.0600000e-03
  -3.3200000e-03
  -5.6500000e-03
  -6.6600000e-03
  -6.7200000e-03
  -4.7400000e-03
  -3.9200000e-03
  -4.9400000e-03
  -5.5100000e-03
  -4.1100000e-03
  -8.0600000e-03
  -6.3300000e-03
  -5.1000000e-03
  -3.8100000e-03
  -3.7000000e-03
  -7.3200000e-03
  -2.8800000e-03
  -4.6600000e-03
  -3.2100000e-03
  -3.4500000e-03
  -5.1300000e-03
  -6.8500000e-03
  -6.0300000e-03
  -6.3300000e-03
  -4.5500000e-03
  -4.6600000e-03
  -6.6900000e-03
  -6.6600000e-03
  -5.9800000e-03
  -4.2800000e-03
  -4.3600000e-03
  -7.5100000e-03
  -3.6700000e-03
  -2.8000000e-03
  -5.7000000e-03
  -4.5800000e-03
  -5.5100000e-03
  -3.0700000e-03
  -3.1800000e-03
  -4.9400000e-03
  -3.3700000e-03
  -4.0300000e-03
  -6.5300000e-03
  -5.7300000e-03
  -7.7900000e-03
  -5.1500000e-03
  -8.3100000e-03
  -6.9900000e-03
  -5.6800000e-03
  -3.2400000e-03
  -4.5000000e-03
  -5.7900000e-03
  -5.8900000e-03
  -5.6200000e-03
  -5.5700000e-03
  -6.0900000e-03
  -5.3700000e-03
  -5.1000000e-03
  -6.1700000e-03
  -3.4800000e-03
  -6.0300000e-03
  -7.2900000e-03
  -8.5800000e-03
  -4.5200000e-03
  -5.4000000e-03
  -5.8900000e-03
  -7.1600000e-03
  -5.4300000e-03
  -8.5000000e-03
  -5.5900000e-03
  -4.1100000e-03
  -2.9900000e-03
  -6.2200000e-03
  -7.9000000e-03
  -7.1600000e-03
  -6.0900000e-03
  -6.4700000e-03
  -5.3500000e-03
  -6.3900000e-03
  -3.5600000e-03
  -5.0400000e-03
  -4.9900000e-03
  -2.9100000e-03
  -2.6900000e-03
  -5.8900000e-03
  -5.7900000e-03
  -4.6300000e-03
  -4.6300000e-03
  -7.2400000e-03
  -4.3600000e-03
  -2.7400000e-03
  -3.4300000e-03
  -5.2100000e-03
  -4.3900000e-03
  -6.4200000e-03
  -6.4400000e-03
  -6.3900000e-03
  -4.5500000e-03
  -4.7400000e-03
  -4.7700000e-03
  -5.2900000e-03
  -3.6500000e-03
  -3.8100000e-03
  -3.7000000e-03
  -5.7900000e-03
  -6.4200000e-03
  -5.7900000e-03
  -8.0900000e-03
  -6.7200000e-03
  -4.7700000e-03
  -4.7400000e-03
  -7.4600000e-03
  -6.4700000e-03
  -5.4600000e-03
  -4.5200000e-03
  -7.1000000e-03
  -5.0200000e-03
  -3.4000000e-03
  -6.8300000e-03
  -7.4000000e-03
  -2.1100000e-03
  -2.5000000e-03
  -2.5200000e-03
  -4.5500000e-03
  -3.4500000e-03
  -3.9500000e-03
  -6.3600000e-03
  -5.3500000e-03
  -5.4300000e-03
  -5.8700000e-03
  -6.3300000e-03
  -8.8000000e-03
  -6.9400000e-03
  -3.1800000e-03
  -5.9800000e-03
  -5.6200000e-03
  -5.4000000e-03
  -6.2200000e-03
  -6.7400000e-03
  -8.4700000e-03
  -5.7900000e-03
  -6.3600000e-03
  -6.0900000e-03
  -4.4700000e-03
  -6.8000000e-03
  -4.2800000e-03
  -3.7600000e-03
  -4.5200000e-03
  -6.8300000e-03
  -6.7400000e-03
  -5.2600000e-03
  -3.9200000e-03
  -6.3100000e-03
  -3.0200000e-03
  -2.6600000e-03
  -5.9200000e-03
  -5.5900000e-03
  -4.6300000e-03
  -2.8500000e-03
  -4.8300000e-03
  -7.4300000e-03
  -5.4800000e-03
  -5.0700000e-03
  -6.2000000e-03
  -6.8500000e-03
  -6.3900000e-03
  -4.3900000e-03
  -6.7400000e-03
  -8.4700000e-03
  -3.9200000e-03
  -3.8700000e-03
  -7.1300000e-03
  -8.2000000e-03
  -6.3900000e-03
  -6.4400000e-03
  -7.8400000e-03
  -7.9200000e-03
  -3.1800000e-03
  -3.2100000e-03
  -7.7900000e-03
  -5.8900000e-03
  -4.7700000e-03
  -7.1300000e-03
  -5.6200000e-03
  -5.7900000e-03
  -5.4800000e-03
  -5.6500000e-03
  -6.4400000e-03
  -3.6700000e-03
  -1.4500000e-03
  -3.5900000e-03
  -4.9600000e-03
  -7.7000000e-03
  -2.8200000e-03
  -5.7300000e-03
  -4.5800000e-03
  -2.0800000e-03
  -5.7900000e-03
  -7.6200000e-03
  -1.0860000e-02
  -4.1900000e-03
  -2.9100000e-03
  -5.3200000e-03
  -4.4700000e-03
  -7.0200000e-03
  -4.3000000e-03
  -6.6400000e-03
  -5.2900000e-03
  -3.6200000e-03
  -5.6800000e-03
  -6.0600000e-03
  -4.5800000e-03
  -6.2500000e-03
  -3.6500000e-03
  -6.8500000e-03
  -4.2500000e-03
  -3.1500000e-03
  -6.6100000e-03
  -3.6700000e-03
  -5.1800000e-03
  -2.3900000e-03
  -3.0400000e-03
  -4.4100000e-03
  -1.8900000e-03
  -6.9600000e-03
  -6.8500000e-03
  -1.8900000e-03
  -6.0000000e-04
  -2.8500000e-03
  -6.8800000e-03
  -6.5800000e-03
  -2.0800000e-03
  -7.1300000e-03
  -4.3600000e-03
  -3.2600000e-03
  -1.4800000e-03
  -4.7700000e-03
  -6.3300000e-03
  -5.0200000e-03
  -5.0200000e-03
  -7.2100000e-03
  -5.6500000e-03
  -3.4500000e-03
  -3.3500000e-03
  -7.7000000e-03
  -5.3200000e-03
  -2.1700000e-03
  -2.8800000e-03
  -5.5100000e-03
  -5.6500000e-03
  -2.0000000e-03
  -4.0600000e-03
  -6.3600000e-03
  -5.1800000e-03
  -3.3200000e-03
  -4.3300000e-03
  -6.9100000e-03
  -3.8900000e-03
  -2.3600000e-03
  -4.9900000e-03
  -5.5900000e-03
  -3.1300000e-03
  -3.3200000e-03
  -4.5800000e-03
  -6.1400000e-03
  -3.9200000e-03
  -2.9600000e-03
  -4.5200000e-03
  -2.9100000e-03
  -3.5400000e-03
  -3.1500000e-03
  -5.7900000e-03
  -7.0700000e-03
  -4.2200000e-03
  -4.8000000e-03
  -4.9100000e-03
  -5.8100000e-03
  -4.1100000e-03
  -3.9500000e-03
  -3.5100000e-03
  -6.9100000e-03
  -6.8500000e-03
  -6.7400000e-03
  -6.5800000e-03
  -4.8500000e-03
  -6.6900000e-03
  -5.2600000e-03
  -4.6300000e-03
  -5.7600000e-03
  -3.9800000e-03
  -2.9100000e-03
  -1.4000000e-03
  -5.3200000e-03
  -7.2100000e-03
  -4.1400000e-03
  -2.1100000e-03
  -3.5400000e-03
  -3.8400000e-03
  -2.6300000e-03
  -1.4500000e-03
  -2.4100000e-03
  -7.1800000e-03
  -2.2500000e-03
  -3.0400000e-03
  -5.0700000e-03
  -7.6500000e-03
  -7.4000000e-03
  -3.5600000e-03
  -4.7700000e-03
  -6.1100000e-03
  -1.4300000e-03
  -4.9000000e-04
  -3.8100000e-03
  -6.5000000e-03
  -6.8500000e-03
  -2.0800000e-03
  -6.3100000e-03
  -6.5800000e-03
  -5.3500000e-03
  -6.2200000e-03
  -4.0000000e-03
  -3.7600000e-03
  -3.1800000e-03
  -2.3300000e-03
  -5.5400000e-03
  -7.0500000e-03
  -4.2200000e-03
  -4.2200000e-03
  -5.6800000e-03
  -5.5100000e-03
  -3.6500000e-03
  -9.3000000e-04
  -5.0200000e-03
  -3.9200000e-03
  -3.7800000e-03
  -5.6200000e-03
  -7.7000000e-03
  -8.8800000e-03
  -6.9900000e-03
  -4.3900000e-03
  -4.9900000e-03
  -3.4800000e-03
  -3.0700000e-03
  -4.9400000e-03
  -7.2700000e-03
  -3.9200000e-03
  -2.3300000e-03
  -3.2400000e-03
  -4.6900000e-03
  -7.1800000e-03
  -6.2500000e-03
  -7.9500000e-03
  -4.2800000e-03
  -1.4500000e-03
  -3.4500000e-03
  -4.9900000e-03
  -8.3900000e-03
  -8.8600000e-03
  -7.3500000e-03
  -6.8300000e-03
  -3.0700000e-03
  -3.7800000e-03
  -3.9800000e-03
  -3.7000000e-03
  -3.9500000e-03
  -2.5000000e-04
  -2.7100000e-03
  -3.2600000e-03
  -3.6500000e-03
  -7.2400000e-03
  -7.2900000e-03
  -7.3800000e-03
  -3.2600000e-03
  -4.2800000e-03
  -6.0300000e-03
  -4.4100000e-03
  -4.5200000e-03
  -5.9500000e-03
  -7.8400000e-03
  -5.7900000e-03
  -3.7300000e-03
  -5.1300000e-03
  -5.4000000e-03
  -1.8100000e-03
  -2.8500000e-03
  -5.8100000e-03
  -7.8400000e-03
  -4.0000000e-03
  -1.7300000e-03
  -5.0200000e-03
  -7.3800000e-03
  -7.2700000e-03
  -8.5800000e-03
  -8.7700000e-03
  -6.9900000e-03
  -3.2600000e-03
  -3.5900000e-03
  -4.3300000e-03
  -4.5200000e-03
  -4.3000000e-03
  -7.1800000e-03
  -6.7200000e-03
  -5.8100000e-03
  -3.4800000e-03
  -3.2900000e-03
  -5.2100000e-03
  -4.2800000e-03
  -2.6600000e-03
  -6.1400000e-03
  -6.1100000e-03
  -3.0400000e-03
  -4.0000000e-03
  -9.6200000e-03
  -6.1100000e-03
  -5.1800000e-03
  -3.3500000e-03
  -3.6200000e-03
  -4.1900000e-03
  -2.0000000e-03
  -6.6600000e-03
  -5.7300000e-03
  -4.7200000e-03
  -2.6600000e-03
  -4.7000000e-04
  -7.7000000e-03
  -7.4600000e-03
  -6.5500000e-03
  -4.7700000e-03
  -4.0600000e-03
  -2.5000000e-03
  -2.8200000e-03
  -4.0300000e-03
  -7.2400000e-03
  -5.2900000e-03
  -5.6800000e-03
  -5.3500000e-03
  -3.7800000e-03
  -6.0600000e-03
  -4.1900000e-03
  -5.1500000e-03
  -4.7400000e-03
  -3.3500000e-03
  -6.7200000e-03
  -5.5400000e-03
  -6.1700000e-03
  -7.4600000e-03
  -4.3600000e-03
  -4.6300000e-03
  -2.1700000e-03
  -2.5800000e-03
  -6.5000000e-03
  -3.6700000e-03
  -3.1500000e-03
  -1.4300000e-03
  -3.6700000e-03
  -5.7300000e-03
  -4.5200000e-03
  -7.1000000e-03
  -5.4300000e-03
  -5.3500000e-03
  -3.5400000e-03
  -4.5800000e-03
  -6.0600000e-03
  -7.4300000e-03
  -3.6200000e-03
  -3.4800000e-03
  -3.7300000e-03
  -5.0400000e-03
  -5.6800000e-03
  -4.9400000e-03
  -4.9100000e-03
  -3.5400000e-03
  -9.3000000e-04
  -1.4800000e-03
  -4.6100000e-03
  -6.5300000e-03
  -5.5700000e-03
  -3.7000000e-03
  -2.9300000e-03
  -4.7400000e-03
  -2.6000000e-03
  -4.2200000e-03
  -3.4500000e-03
  -5.8900000e-03
  -6.0900000e-03
  -2.9100000e-03
  -2.4100000e-03
  -4.2200000e-03
  -5.0700000e-03
  -5.1000000e-03
  -3.5900000e-03
  -3.7800000e-03
  -5.1000000e-03
  -5.0200000e-03
  -5.7600000e-03
  -6.4700000e-03
  -5.1800000e-03
  -5.8400000e-03
  -3.1300000e-03
  -4.6900000e-03
  -5.6200000e-03
  -5.3700000e-03
  -7.1000000e-03
  -2.7100000e-03
  -3.4500000e-03
  -4.7200000e-03
  -5.2900000e-03
  -3.1800000e-03
  -3.3500000e-03
  -5.0700000e-03
  -6.2500000e-03
  -2.5500000e-03
  -3.8400000e-03
  -3.0400000e-03
  -4.4700000e-03
  -4.3300000e-03
  -2.6900000e-03
  -5.5700000e-03
  -7.5100000e-03
  -3.8100000e-03
  -3.2100000e-03
  -4.4400000e-03
  -6.4200000e-03
  -5.6500000e-03
  -5.3500000e-03
  -5.6500000e-03
  -6.4400000e-03
  -4.0300000e-03
  -4.7700000e-03
  -3.0200000e-03
  -6.1700000e-03
  -4.1400000e-03
  -1.7300000e-03
  -2.2200000e-03
  -4.0300000e-03
  -3.4800000e-03
  -4.7400000e-03
  -4.1400000e-03
  -4.7700000e-03
  -6.2200000e-03
  -4.3900000e-03
  -4.3900000e-03
  -4.2800000e-03
  -7.1000000e-03
  -8.6600000e-03
  -5.7900000e-03
  -6.5300000e-03
  -6.0300000e-03
  -6.3300000e-03
  -6.0600000e-03
  -6.2500000e-03
  -5.7000000e-03
  -5.8700000e-03
  -3.9800000e-03
  -3.9200000e-03
  -6.2800000e-03
  -6.2800000e-03
  -3.3700000e-03
  -5.5000000e-04
  -4.4700000e-03
  -4.7200000e-03
  -6.7200000e-03
  -6.3300000e-03
  -4.2200000e-03
  -3.4300000e-03
  -3.7600000e-03
  -4.7200000e-03
  -6.6400000e-03
  -7.7600000e-03
  -5.3700000e-03
  -3.4500000e-03
  -2.1900000e-03
  -4.3300000e-03
  -4.4700000e-03
  -5.2600000e-03
  -6.7700000e-03
  -5.4600000e-03
  -6.2200000e-03
  -5.3200000e-03
  -4.3900000e-03
  -5.3700000e-03
  -6.1100000e-03
  -5.5700000e-03
  -4.1100000e-03
  -3.7800000e-03
  -5.4800000e-03
  -5.8900000e-03
  -5.8400000e-03
  -5.6200000e-03
  -3.9800000e-03
  -4.1700000e-03
  -2.5200000e-03
  -1.2900000e-03
  -3.4500000e-03
  -5.7900000e-03
  -5.7600000e-03
  -6.4700000e-03
  -3.4300000e-03
  -5.1300000e-03
  -3.5600000e-03
  -3.5600000e-03
  -6.3100000e-03
  -5.7900000e-03
  -6.4700000e-03
  -4.0300000e-03
  -3.2100000e-03
  -4.0300000e-03
  -5.4800000e-03
  -6.7200000e-03
  -5.1500000e-03
  -4.5000000e-03
  -5.1000000e-03
  -5.5400000e-03
  -2.9600000e-03
  -4.9100000e-03
  -5.6500000e-03
  -6.9100000e-03
  -5.6200000e-03
  -4.1700000e-03
  -6.5500000e-03
  -8.4200000e-03
  -5.7600000e-03
  -3.4500000e-03
  -2.3300000e-03
  -3.2100000e-03
  -4.2800000e-03
  -3.2600000e-03
  -4.6600000e-03
  -3.5400000e-03
  -3.8700000e-03
  -3.8700000e-03
  -2.9900000e-03
  -4.5000000e-03
  -2.0800000e-03
  -2.7100000e-03
  -2.4400000e-03
  -4.5500000e-03
  -7.8100000e-03
  -6.4200000e-03
  -6.1700000e-03
  -3.5100000e-03
  -3.5100000e-03
  -6.6900000e-03
  -5.0700000e-03
  -6.1100000e-03
  -5.7300000e-03
  -3.6200000e-03
  -5.7300000e-03
  -5.4600000e-03
  -8.1400000e-03
  -9.9000000e-03
  -4.7400000e-03
  -4.4100000e-03
  -2.0800000e-03
  -5.8900000e-03
  -5.8400000e-03
  -4.6300000e-03
  -5.6500000e-03
  -2.3000000e-03
  -1.5100000e-03
  -5.5700000e-03
  -4.8500000e-03
  -6.7200000e-03
  -3.0700000e-03
  -3.0400000e-03
  -5.2000000e-04
  -1.5900000e-03
  -5.3200000e-03
  -4.4100000e-03
  -6.0900000e-03
  -6.2800000e-03
  -5.6800000e-03
  -6.8300000e-03
  -4.7700000e-03
  -5.4600000e-03
  -4.7400000e-03
  -7.5400000e-03
  -6.4400000e-03
  -3.3500000e-03
  -5.9500000e-03
  -7.8700000e-03
  -8.0900000e-03
  -6.4400000e-03
  -5.4300000e-03
  -4.8300000e-03
  -3.1300000e-03
  -1.6200000e-03
  -3.7300000e-03
  -4.1900000e-03
  -4.9400000e-03
  -2.6000000e-03
  -8.2000000e-04
  -3.4300000e-03
  -4.1700000e-03
  -6.3600000e-03
  -4.6300000e-03
  -3.7600000e-03
  -3.8900000e-03
  -3.2100000e-03
  -6.8300000e-03
  -7.0200000e-03
  -7.9500000e-03
  -9.1000000e-03
  -6.1700000e-03
  -7.2400000e-03
  -6.9600000e-03
  -8.6900000e-03
  -8.6600000e-03
  -5.3200000e-03
  -4.0600000e-03
  -4.3600000e-03
  -4.6100000e-03
  -7.4300000e-03
  -4.4700000e-03
  -7.7900000e-03
  -5.2100000e-03
  -1.3400000e-03
  -4.9900000e-03
  -6.7700000e-03
  -8.2000000e-03
  -4.1700000e-03
  -1.5600000e-03
  -4.8300000e-03
  -5.3200000e-03
  -7.5100000e-03
  -6.5300000e-03
  -5.8700000e-03
  -4.3300000e-03
  -4.5500000e-03
  -4.3300000e-03
  -7.8100000e-03
  -8.5000000e-03
  -6.2200000e-03
  -4.5800000e-03
  -4.7400000e-03
  -6.0900000e-03
  -5.7000000e-03
  -7.5100000e-03
  -6.0300000e-03
  -6.0900000e-03
  -3.9200000e-03
  -5.0700000e-03
  -5.6200000e-03
  -5.7300000e-03
  -5.8100000e-03
  -5.0200000e-03
  -4.1700000e-03
  -4.1900000e-03
  -7.4600000e-03
  -7.6800000e-03
  -1.0340000e-02
  -6.6600000e-03
  -6.0900000e-03
  -4.1100000e-03
  -2.5800000e-03
  -6.5000000e-03
  -5.3500000e-03
  -7.8400000e-03
  -4.0000000e-03
  -3.1800000e-03
  -4.1100000e-03
  -5.6800000e-03
  -6.3600000e-03
  -5.1300000e-03
  -4.4700000e-03
  -5.7900000e-03
  -4.4100000e-03
  -3.2400000e-03
  -4.5500000e-03
  -6.8300000e-03
  -5.7300000e-03
  -4.6100000e-03
  -6.0300000e-03
  -7.6800000e-03
  -5.8100000e-03
  -7.0500000e-03
  -5.1800000e-03
  -5.1000000e-03
  -4.1100000e-03
  -2.9300000e-03
  -6.2000000e-03
  -6.1400000e-03
  -6.7200000e-03
  -4.9100000e-03
  -5.0400000e-03
  -4.3000000e-03
  -5.4000000e-03
  -5.7000000e-03
  -5.7000000e-03
  -4.2500000e-03
  -5.2100000e-03
  -5.5400000e-03
  -6.5800000e-03
  -3.7000000e-03
  -1.5900000e-03
  -2.0600000e-03
  -4.3900000e-03
  -4.7400000e-03
  -2.6300000e-03
  -2.7700000e-03
  -3.3200000e-03
  -2.8500000e-03
  -4.5200000e-03
  -7.5900000e-03
  -7.8100000e-03
  -6.7400000e-03
  -6.2200000e-03
  -6.2500000e-03
  -6.6600000e-03
  -6.1400000e-03
  -8.2500000e-03
  -4.7400000e-03
  -6.2800000e-03
  -5.3200000e-03
  -5.2600000e-03
  -4.9100000e-03
  -3.8100000e-03
  -4.9900000e-03
  -4.5500000e-03
  -2.2200000e-03
  -2.1100000e-03
  -1.8900000e-03
  -6.2800000e-03
  -7.1300000e-03
  -4.4700000e-03
  -5.4600000e-03
  -2.5200000e-03
  -4.0600000e-03
  -3.0200000e-03
  -6.9600000e-03
  -8.2300000e-03
  -6.5500000e-03
  -5.2100000e-03
  -5.8700000e-03
  -4.2200000e-03
  -6.7400000e-03
  -4.1700000e-03
  -4.3300000e-03
  -3.8700000e-03
  -2.5500000e-03
  -4.3900000e-03
  -1.2100000e-03
  -4.5000000e-03
  -5.5100000e-03
  -5.5400000e-03
  -5.4000000e-03
  -4.8500000e-03
  -6.4200000e-03
  -6.0300000e-03
  -4.5800000e-03
  -2.4100000e-03
  -3.8400000e-03
  -5.9800000e-03
  -6.2800000e-03
  -6.6600000e-03
  -7.0700000e-03
  -7.6200000e-03
  -5.8700000e-03
  -5.5100000e-03
  -4.2200000e-03
  -5.4300000e-03
  -3.6700000e-03
  -3.0400000e-03
  -3.8400000e-03
  -6.8500000e-03
  -7.4000000e-03
  -4.8000000e-03
  -4.1100000e-03
  -4.0300000e-03
  -3.7000000e-03
  -3.2400000e-03
  -2.3600000e-03
  -3.9800000e-03
  -5.0200000e-03
  -4.1100000e-03
  -3.6200000e-03
  -5.8900000e-03
  -7.4300000e-03
  -7.3500000e-03
  -4.8300000e-03
  -5.5400000e-03
  -6.8300000e-03
  -7.0700000e-03
  -4.9900000e-03
  -6.7700000e-03
  -7.7300000e-03
  -5.8400000e-03
  -3.4800000e-03
  -7.5400000e-03
  -8.0100000e-03
  -6.3100000e-03
  -2.2200000e-03
  -8.5000000e-04
  -2.0600000e-03
  -4.1700000e-03
  -4.2200000e-03
  -6.2200000e-03
  -6.2500000e-03
  -5.7000000e-03
  -3.3500000e-03
  -2.5800000e-03
  -4.6900000e-03
  -5.5100000e-03
  -2.4100000e-03
  -3.5900000e-03
  -4.1900000e-03
  -5.0200000e-03
  -5.7600000e-03
  -7.5700000e-03
  -8.7700000e-03
  -7.1600000e-03
  -6.6900000e-03
  -6.7400000e-03
  -7.9500000e-03
  -8.4700000e-03
  -7.2700000e-03
  -5.6800000e-03
  -4.8300000e-03
  -8.8000000e-03
  -5.8100000e-03
  -5.9200000e-03
  -3.3200000e-03
  -3.7300000e-03
  -2.6300000e-03
  -1.0100000e-03
  -1.7800000e-03
  -4.1100000e-03
  -3.2600000e-03
  -3.4000000e-03
  -4.3900000e-03
  -5.6200000e-03
  -5.8900000e-03
  -4.5000000e-03
  -4.1700000e-03
  -4.5200000e-03
  -3.6200000e-03
  -7.2700000e-03
  -7.1000000e-03
  -8.3900000e-03
  -8.2800000e-03
  -6.2500000e-03
  -7.7600000e-03
  -8.0600000e-03
  -4.8500000e-03
  -5.1800000e-03
  -4.0900000e-03
  -5.6200000e-03
  -4.6100000e-03
  -5.5100000e-03
  -7.5700000e-03
  -4.3000000e-03
  -3.1500000e-03
  -5.1000000e-03
  -3.6700000e-03
  -2.9300000e-03
  -1.3400000e-03
  -3.6700000e-03
  -4.5200000e-03
  -1.1500000e-03
  -3.7300000e-03
  -4.6900000e-03
  -6.9900000e-03
  -5.5100000e-03
  -5.7000000e-03
  -6.2500000e-03
  -5.8100000e-03
  -3.6500000e-03
  -3.4500000e-03
  -7.8100000e-03
  -4.8000000e-03
  -4.7200000e-03
  -4.5200000e-03
  -7.3200000e-03
  -8.4200000e-03
  -5.5100000e-03
  -3.0200000e-03
  -5.8700000e-03
  -2.4100000e-03
  -4.6900000e-03
  -7.1800000e-03
  -8.6600000e-03
  -7.9500000e-03
  -3.1300000e-03
  -5.1800000e-03
  -4.9600000e-03
  -4.6300000e-03
  -6.6100000e-03
  -4.9400000e-03
  -4.0300000e-03
  -3.7800000e-03
  -3.2400000e-03
  -3.7300000e-03
  -5.3700000e-03
  -6.3600000e-03
  -5.7000000e-03
  -2.7400000e-03
  -2.7100000e-03
  -2.1900000e-03
  -2.6000000e-03
  -5.1800000e-03
  -6.7200000e-03
  -6.5000000e-03
  -4.9100000e-03
  -3.2100000e-03
  -2.9300000e-03
  -8.0100000e-03
  -8.4400000e-03
  -6.3600000e-03
  -5.4000000e-03
  -5.7900000e-03
  -4.7200000e-03
  -5.5100000e-03
  -7.3800000e-03
  -1.0140000e-02
  -7.8100000e-03
  -4.6300000e-03
  -2.6000000e-03
  -5.7900000e-03
  -7.4900000e-03
  -7.8100000e-03
  -7.5400000e-03
  -5.8700000e-03
  -3.4300000e-03
  -2.1400000e-03
  -5.3700000e-03
  -6.8500000e-03
  -6.9400000e-03
  -4.9400000e-03
  -1.3700000e-03
  -1.5600000e-03
  -2.4700000e-03
  -7.6200000e-03
  -6.8300000e-03
  -6.3900000e-03
  -3.9800000e-03
  -2.3600000e-03
  -2.8500000e-03
  -5.9500000e-03
  -7.5900000e-03
  -9.7100000e-03
  -6.3100000e-03
  -4.2500000e-03
  -3.7600000e-03
  -7.4000000e-03
  -1.1490000e-02
  -9.4900000e-03
  -6.4200000e-03
  -4.3000000e-03
  -2.2000000e-04
  -4.4100000e-03
  -6.8300000e-03
  -9.1300000e-03
  -6.7200000e-03
  -2.0300000e-03
  -3.7800000e-03
  -4.3600000e-03
  -5.0700000e-03
  -5.8400000e-03
  -5.6500000e-03
  -3.7300000e-03
  -1.8900000e-03
  -2.8200000e-03
  -5.1800000e-03
  -6.1400000e-03
  -6.9900000e-03
  -5.6500000e-03
  -4.7700000e-03
  -2.1100000e-03
  -1.6700000e-03
  -5.7300000e-03
  -8.7500000e-03
  -7.1000000e-03
  -4.2200000e-03
  -5.9200000e-03
  -6.3900000e-03
  -7.0700000e-03
  -7.0700000e-03
  -6.6600000e-03
  -4.9900000e-03
  -7.4000000e-04
  -2.5200000e-03
  -4.1900000e-03
  -6.3900000e-03
  -4.9600000e-03
  -3.9800000e-03
  -7.1600000e-03
  -6.0000000e-03
  -5.9500000e-03
  -5.0700000e-03
  -8.4200000e-03
  -7.8400000e-03
  -3.7800000e-03
  -6.1100000e-03
  -7.6800000e-03
  -7.2900000e-03
  -6.2800000e-03
  -5.0400000e-03
  -5.8900000e-03
  -2.6900000e-03
   1.9000000e-04
  -2.3900000e-03
  -1.5400000e-03
  -2.9900000e-03
  -1.1200000e-03
   3.0000000e-05
  -2.5500000e-03
  -5.4000000e-03
  -4.2200000e-03
  -4.5500000e-03
  -4.6600000e-03
  -4.6900000e-03
  -4.3000000e-03
  -5.0700000e-03
  -5.7600000e-03
  -5.0700000e-03
  -8.5000000e-03
  -9.5100000e-03
  -4.9900000e-03
  -6.0300000e-03
  -6.4400000e-03
  -4.6300000e-03
  -4.4700000e-03
  -5.4600000e-03
  -7.4000000e-03
  -5.8400000e-03
  -4.9900000e-03
  -5.7600000e-03
  -6.9400000e-03
  -5.7300000e-03
  -3.2600000e-03
  -3.0400000e-03
  -4.0900000e-03
  -5.2100000e-03
  -1.3400000e-03
  -6.6000000e-04
  -2.1400000e-03
  -2.8800000e-03
  -2.0300000e-03
  -3.3500000e-03
  -3.3500000e-03
  -5.2900000e-03
  -3.5400000e-03
  -2.9100000e-03
  -4.8500000e-03
  -5.9500000e-03
  -6.1100000e-03
  -6.4200000e-03
  -6.5300000e-03
  -9.5100000e-03
  -5.9200000e-03
  -4.5000000e-03
  -6.8500000e-03
  -6.1700000e-03
  -5.0400000e-03
  -3.0400000e-03
  -2.5800000e-03
  -7.5400000e-03
  -4.0900000e-03
  -4.7200000e-03
  -6.1100000e-03
  -3.9200000e-03
  -3.1300000e-03
  -4.9000000e-04
  -1.8100000e-03
  -6.5300000e-03
  -3.5900000e-03
  -2.2200000e-03
  -3.3200000e-03
  -3.4500000e-03
  -3.4000000e-03
  -1.2300000e-03
  -5.2600000e-03
  -7.7000000e-03
  -1.9000000e-04
  -3.3200000e-03
  -6.2000000e-03
  -6.3100000e-03
  -6.0900000e-03
  -5.3500000e-03
  -9.4300000e-03
  -5.8700000e-03
  -4.1100000e-03
  -6.1700000e-03
  -5.8400000e-03
  -6.0900000e-03
  -5.1300000e-03
  -3.4800000e-03
  -3.9200000e-03
  -5.4000000e-03
  -3.4000000e-03
  -4.6100000e-03
  -5.1000000e-03
  -5.0400000e-03
  -4.3000000e-03
  -2.9100000e-03
  -4.7700000e-03
  -4.4700000e-03
  -4.3600000e-03
  -7.3200000e-03
  -7.3200000e-03
  -5.4600000e-03
  -5.4600000e-03
  -2.4700000e-03
  -2.8000000e-03
  -4.8000000e-03
  -5.2100000e-03
  -4.2200000e-03
  -5.8000000e-04
  -4.8300000e-03
  -2.4400000e-03
  -3.2100000e-03
  -5.4600000e-03
  -4.7200000e-03
  -1.9500000e-03
  -1.9200000e-03
  -4.8300000e-03
  -6.4400000e-03
  -5.9500000e-03
  -6.2000000e-03
  -5.3200000e-03
  -5.5900000e-03
  -6.3100000e-03
  -5.7600000e-03
  -6.3600000e-03
  -6.2000000e-03
  -4.0900000e-03
  -3.5100000e-03
  -4.1900000e-03
  -5.7600000e-03
  -4.3900000e-03
  -6.8000000e-03
  -7.5400000e-03
  -4.2200000e-03
  -1.7800000e-03
  -2.4400000e-03
  -6.3900000e-03
  -4.3900000e-03
  -6.5500000e-03
  -7.0500000e-03
  -3.2900000e-03
  -2.5800000e-03
  -3.6200000e-03
  -5.1000000e-03
  -5.8400000e-03
  -4.4100000e-03
  -3.9500000e-03
  -2.8800000e-03
  -3.9500000e-03
  -5.4300000e-03
  -4.9400000e-03
  -6.1700000e-03
  -5.8100000e-03
  -2.5200000e-03
  -3.7600000e-03
  -4.9400000e-03
  -5.1000000e-03
  -2.8800000e-03
  -1.4300000e-03
  -3.6500000e-03
  -1.9200000e-03
  -5.5900000e-03
  -6.7700000e-03
  -5.5900000e-03
  -5.0200000e-03
  -3.1800000e-03
  -2.5800000e-03
  -3.5900000e-03
  -5.5400000e-03
  -8.1200000e-03
  -5.1800000e-03
  -4.9400000e-03
  -4.8300000e-03
  -4.4400000e-03
  -5.6200000e-03
  -5.8700000e-03
  -5.9200000e-03
  -5.1800000e-03
  -4.3300000e-03
  -2.1700000e-03
  -4.1900000e-03
  -5.4600000e-03
  -6.5800000e-03
  -6.3100000e-03
  -3.1500000e-03
  -2.3000000e-03
  -2.7400000e-03
  -4.4100000e-03
  -3.4500000e-03
  -3.4500000e-03
  -4.0300000e-03
  -4.6100000e-03
  -2.2500000e-03
  -3.9500000e-03
  -5.8900000e-03
  -6.3300000e-03
  -4.4100000e-03
  -4.3300000e-03
  -5.7900000e-03
  -4.5800000e-03
  -2.5000000e-03
  -2.2200000e-03
  -8.7700000e-03
  -9.1000000e-03
  -7.5900000e-03
  -4.9400000e-03
  -5.0700000e-03
  -8.0600000e-03
  -5.2400000e-03
  -5.0700000e-03
  -5.9800000e-03
  -6.4400000e-03
  -3.8900000e-03
  -4.3900000e-03
  -5.8400000e-03
  -3.7000000e-03
  -1.9700000e-03
  -2.3300000e-03
  -3.5100000e-03
  -3.0700000e-03
  -3.9200000e-03
  -3.5400000e-03
  -2.5000000e-03
  -4.3900000e-03
  -5.5100000e-03
  -4.5500000e-03
  -6.5500000e-03
  -7.5700000e-03
  -5.8100000e-03
  -5.9200000e-03
  -6.1400000e-03
  -4.9600000e-03
  -4.2500000e-03
  -7.1000000e-03
  -8.4400000e-03
  -5.0400000e-03
  -6.2500000e-03
  -8.2800000e-03
  -3.7000000e-03
  -3.5100000e-03
  -6.3300000e-03
  -6.3900000e-03
  -6.2200000e-03
  -6.8000000e-03
  -5.9800000e-03
  -6.3900000e-03
  -5.5100000e-03
  -6.0000000e-03
  -7.1600000e-03
  -5.2600000e-03
  -4.0000000e-03
  -2.4700000e-03
  -2.6000000e-03
  -7.9000000e-03
  -5.6800000e-03
  -3.5600000e-03
  -5.9500000e-03
  -5.4800000e-03
  -5.2100000e-03
  -3.8400000e-03
  -3.8400000e-03
  -7.1600000e-03
  -2.5200000e-03
  -6.9100000e-03
  -6.7200000e-03
  -3.8700000e-03
  -6.7700000e-03
  -5.0700000e-03
  -7.5700000e-03
  -6.8800000e-03
  -4.1100000e-03
  -5.8100000e-03
  -3.9500000e-03
  -6.2200000e-03
  -6.3900000e-03
  -6.7700000e-03
  -5.8100000e-03
  -4.8300000e-03
  -6.1400000e-03
  -8.8000000e-03
  -6.7700000e-03
  -4.8300000e-03
  -4.4100000e-03
  -5.4800000e-03
  -5.5100000e-03
  -6.6100000e-03
  -7.8100000e-03
  -9.7600000e-03
  -7.5900000e-03
  -4.6600000e-03
  -5.3700000e-03
  -5.0400000e-03
  -2.9900000e-03
  -4.0300000e-03
  -6.5300000e-03
  -5.4000000e-03
  -2.6300000e-03
  -1.5400000e-03
  -5.9500000e-03
  -5.3500000e-03
  -3.8400000e-03
  -5.0400000e-03
  -4.9100000e-03
  -4.8500000e-03
  -3.4800000e-03
  -3.0200000e-03
  -7.3200000e-03
  -6.5500000e-03
  -5.2100000e-03
  -6.6100000e-03
  -8.4200000e-03
  -7.8400000e-03
  -4.6600000e-03
  -5.6800000e-03
  -5.4000000e-03
  -6.5000000e-03
  -2.2200000e-03
  -5.8100000e-03
  -5.0700000e-03
  -5.5700000e-03
  -4.1700000e-03
  -2.9900000e-03
  -4.5500000e-03
  -2.6900000e-03
  -2.7700000e-03
  -3.5900000e-03
  -6.2500000e-03
  -5.9200000e-03
  -1.3400000e-03
  -2.5800000e-03
  -5.1000000e-03
  -5.5100000e-03
  -4.9100000e-03
  -5.7900000e-03
  -3.4000000e-03
  -4.2500000e-03
  -5.0700000e-03
  -6.8500000e-03
  -7.0500000e-03
  -7.3200000e-03
  -7.1600000e-03
  -3.9800000e-03
  -7.5900000e-03
  -7.9200000e-03
  -6.7200000e-03
  -5.0200000e-03
  -6.0900000e-03
  -5.3200000e-03
  -2.8500000e-03
  -6.0600000e-03
  -7.4000000e-03
  -6.3600000e-03
  -6.6100000e-03
  -4.7200000e-03
  -4.3600000e-03
  -6.4400000e-03
  -4.2800000e-03
  -4.0900000e-03
  -2.1900000e-03
  -3.6500000e-03
  -6.3900000e-03
  -4.7200000e-03
  -5.9200000e-03
  -3.0400000e-03
  -4.5000000e-03
  -4.4100000e-03
  -5.7900000e-03
  -5.1300000e-03
  -4.5800000e-03
  -5.6200000e-03
  -3.6500000e-03
  -4.7200000e-03
  -6.0000000e-03
  -7.7000000e-03
  -5.3200000e-03
  -4.0900000e-03
  -5.8900000e-03
  -3.4000000e-03
  -3.2900000e-03
  -4.0000000e-03
  -5.8400000e-03
  -7.9000000e-03
  -8.0100000e-03
  -6.9400000e-03
  -5.4300000e-03
  -5.9500000e-03
  -8.0600000e-03
  -6.6600000e-03
  -7.8400000e-03
  -6.7700000e-03
  -5.9800000e-03
  -5.9200000e-03
  -6.0000000e-03
  -7.7600000e-03
  -7.6500000e-03
  -7.8700000e-03
  -7.6500000e-03
  -3.4300000e-03
  -3.7300000e-03
  -3.7000000e-03
  -2.9600000e-03
  -4.9400000e-03
  -5.1300000e-03
  -5.2600000e-03
  -5.2900000e-03
  -3.5900000e-03
  -6.7700000e-03
  -6.2000000e-03
  -4.7700000e-03
  -4.9900000e-03
  -3.2900000e-03
  -4.7700000e-03
  -7.1300000e-03
  -6.2500000e-03
  -8.2800000e-03
  -5.8400000e-03
  -4.7200000e-03
  -8.6600000e-03
  -5.9200000e-03
  -6.1700000e-03
  -5.3200000e-03
  -4.4400000e-03
  -7.4000000e-03
  -5.7900000e-03
  -5.9500000e-03
  -4.6900000e-03
  -4.2800000e-03
  -6.5800000e-03
  -5.3700000e-03
  -5.4000000e-03
  -6.7400000e-03
  -2.1700000e-03
  -2.2800000e-03
  -4.5000000e-03
  -5.7600000e-03
  -6.3100000e-03
  -5.7000000e-03
  -5.6500000e-03
  -5.9200000e-03
  -4.0300000e-03
  -4.2200000e-03
  -4.2800000e-03
  -4.8500000e-03
  -6.5000000e-03
  -6.3600000e-03
  -5.1300000e-03
  -5.5900000e-03
  -4.8300000e-03
  -6.2800000e-03
  -7.1600000e-03
  -6.4400000e-03
  -5.8900000e-03
  -7.0700000e-03
  -3.8100000e-03
  -6.8500000e-03
  -5.2100000e-03
  -7.0500000e-03
  -6.7700000e-03
  -3.5400000e-03
  -3.1300000e-03
  -4.9600000e-03
  -3.2900000e-03
  -3.6500000e-03
  -3.3200000e-03
  -4.8000000e-03
  -4.4400000e-03
  -4.0300000e-03
  -5.7000000e-03
  -5.4000000e-03
  -5.1800000e-03
  -6.9100000e-03
  -4.8300000e-03
  -6.8800000e-03
  -4.6600000e-03
  -5.4800000e-03
  -5.7300000e-03
  -4.8000000e-03
  -4.5200000e-03
  -5.4600000e-03
  -4.3000000e-03
  -4.3000000e-03
  -3.8900000e-03
  -3.3200000e-03
  -3.4000000e-03
  -8.0000000e-04
  -4.4400000e-03
  -5.8700000e-03
  -6.6400000e-03
  -3.7600000e-03
  -5.7000000e-03
  -7.5400000e-03
  -6.0300000e-03
  -4.3000000e-03
  -5.8400000e-03
  -8.7200000e-03
  -5.5400000e-03
  -4.7200000e-03
  -6.5800000e-03
  -6.8500000e-03
  -6.5300000e-03
  -5.0200000e-03
  -6.8500000e-03
  -7.1000000e-03
  -4.3300000e-03
  -4.6300000e-03
  -5.7000000e-03
  -4.9400000e-03
  -8.2800000e-03
  -4.8000000e-03
  -7.2400000e-03
  -5.9800000e-03
  -3.2400000e-03
  -4.2800000e-03
  -4.2800000e-03
  -6.4200000e-03
  -4.5200000e-03
  -2.3900000e-03
  -3.2400000e-03
  -2.8800000e-03
  -5.2600000e-03
  -6.3100000e-03
  -4.8800000e-03
  -5.4000000e-03
  -6.6100000e-03
  -3.8700000e-03
  -4.5500000e-03
  -5.5400000e-03
  -6.0300000e-03
  -6.1100000e-03
  -4.3300000e-03
  -5.0200000e-03
  -5.0700000e-03
  -5.5400000e-03
  -5.6500000e-03
  -4.6600000e-03
  -4.9900000e-03
  -7.0200000e-03
  -4.1900000e-03
  -6.1400000e-03
  -7.5400000e-03
  -4.9600000e-03
  -5.8400000e-03
  -6.2200000e-03
  -7.0200000e-03
  -7.1000000e-03
  -6.1100000e-03
  -4.7400000e-03
  -4.9600000e-03
  -5.5100000e-03
  -6.4400000e-03
  -4.8800000e-03
  -4.3300000e-03
  -6.1100000e-03
  -3.6700000e-03
  -5.9200000e-03
  -5.6200000e-03
  -7.2700000e-03
  -7.9500000e-03
  -7.4300000e-03
  -6.2200000e-03
  -5.5900000e-03
  -5.7000000e-03
  -5.6800000e-03
  -5.6800000e-03
  -6.9900000e-03
  -5.9500000e-03
  -3.6700000e-03
  -3.2900000e-03
  -5.8100000e-03
  -7.1000000e-03
  -5.4300000e-03
  -5.0400000e-03
  -5.5900000e-03
  -5.3500000e-03
  -5.8700000e-03
  -5.5100000e-03
  -5.9800000e-03
  -4.8800000e-03
  -5.3200000e-03
  -4.9400000e-03
  -5.7900000e-03
  -8.0900000e-03
  -5.0200000e-03
  -3.5400000e-03
  -3.4500000e-03
  -3.5400000e-03
  -2.6300000e-03
  -4.1900000e-03
  -3.3500000e-03
  -5.4300000e-03
  -4.1100000e-03
  -5.0400000e-03
  -2.9600000e-03
  -2.6600000e-03
  -5.5400000e-03
  -5.0700000e-03
  -4.1900000e-03
  -6.4400000e-03
  -6.6600000e-03
  -6.3300000e-03
  -5.8700000e-03
  -7.6500000e-03
  -1.0060000e-02
  -5.1000000e-03
  -4.2200000e-03
  -5.9200000e-03
  -6.3100000e-03
  -8.0900000e-03
  -5.4600000e-03
  -3.4500000e-03
  -3.9200000e-03
  -2.8800000e-03
  -6.7400000e-03
  -6.8800000e-03
  -7.4600000e-03
  -4.4100000e-03
  -4.9000000e-04
  -3.2100000e-03
  -6.2800000e-03
  -6.1100000e-03
  -5.4000000e-03
  -5.8900000e-03
  -5.2600000e-03
  -4.4400000e-03
  -5.1000000e-03
  -6.9400000e-03
  -5.9800000e-03
  -1.5600000e-03
  -4.3900000e-03
  -4.0000000e-03
  -3.8700000e-03
  -4.8300000e-03
  -6.2500000e-03
  -3.8900000e-03
  -2.5000000e-03
  -1.0100000e-03
  -5.1800000e-03
  -5.1000000e-03
  -4.0300000e-03
  -4.7400000e-03
  -4.6600000e-03
  -5.1800000e-03
  -4.6100000e-03
  -7.6500000e-03
  -8.0100000e-03
  -6.2000000e-03
  -5.2600000e-03
  -4.4400000e-03
  -9.6000000e-03
  -7.6800000e-03
  -6.1100000e-03
  -6.4700000e-03
  -4.5000000e-03
  -5.3500000e-03
  -4.3000000e-03
  -7.8700000e-03
  -9.6500000e-03
  -4.2200000e-03
  -4.8000000e-03
  -3.8900000e-03
  -4.6900000e-03
  -5.5700000e-03
  -3.8100000e-03
  -4.5800000e-03
  -4.8800000e-03
  -2.4700000e-03
  -3.8700000e-03
  -2.9300000e-03
  -5.0400000e-03
  -4.3600000e-03
  -3.9500000e-03
  -4.6300000e-03
  -5.8100000e-03
  -5.7000000e-03
  -7.5400000e-03
  -4.9900000e-03
  -6.2200000e-03
  -6.1100000e-03
  -5.5900000e-03
  -4.6100000e-03
  -6.5500000e-03
  -7.6800000e-03
  -7.4000000e-03
  -5.4000000e-03
  -6.0000000e-03
  -3.7800000e-03
  -3.3200000e-03
  -4.6100000e-03
  -7.7900000e-03
  -7.9000000e-03
  -6.5500000e-03
  -4.1100000e-03
  -4.0600000e-03
  -3.1500000e-03
  -1.4800000e-03
  -2.0300000e-03
  -4.7700000e-03
  -2.4700000e-03
  -1.7000000e-03
  -3.1800000e-03
  -3.8100000e-03
  -3.9800000e-03
  -1.7000000e-03
  -4.4100000e-03
  -7.1800000e-03
  -6.1400000e-03
  -4.9400000e-03
  -5.7000000e-03
  -6.2200000e-03
  -6.3100000e-03
  -4.5800000e-03
  -1.0450000e-02
  -1.0040000e-02
  -8.5000000e-03
  -7.2400000e-03
  -4.5000000e-03
  -6.7700000e-03
  -1.5400000e-03
  -4.4400000e-03
  -5.4300000e-03
  -5.1500000e-03
  -5.2600000e-03
  -2.4100000e-03
  -5.7600000e-03
  -6.6400000e-03
  -4.8500000e-03
  -4.9900000e-03
  -3.4500000e-03
  -2.4700000e-03
  -1.9200000e-03
  -3.3200000e-03
  -7.5400000e-03
  -4.6900000e-03
  -4.2800000e-03
  -4.4100000e-03
  -2.2200000e-03
  -3.0200000e-03
  -5.0000000e-05
  -2.4400000e-03
  -3.7300000e-03
  -2.9600000e-03
  -5.4600000e-03
  -5.4600000e-03
  -6.5300000e-03
  -5.6200000e-03
  -5.9200000e-03
  -8.0100000e-03
  -8.8600000e-03
  -5.4000000e-03
  -2.8500000e-03
  -3.1800000e-03
  -5.7600000e-03
  -8.0600000e-03
  -7.3200000e-03
  -7.4000000e-03
  -6.2800000e-03
  -5.7600000e-03
  -3.5900000e-03
  -4.3000000e-03
  -5.0400000e-03
  -5.3500000e-03
  -5.1800000e-03
  -2.8500000e-03
  -5.1300000e-03
  -6.1400000e-03
  -7.2900000e-03
  -6.6600000e-03
  -4.4700000e-03
  -3.5400000e-03
  -2.2500000e-03
  -2.9100000e-03
  -4.4400000e-03
  -4.8000000e-03
  -5.4300000e-03
  -7.9800000e-03
  -6.8500000e-03
  -7.4900000e-03
  -5.7900000e-03
  -4.9100000e-03
  -5.7000000e-03
  -3.4000000e-03
  -4.7400000e-03
  -6.5000000e-03
  -6.0000000e-03
  -5.2600000e-03
  -4.8000000e-03
  -6.5800000e-03
  -8.1200000e-03
  -3.4300000e-03
  -2.5800000e-03
  -5.3200000e-03
  -5.8100000e-03
  -6.2000000e-03
  -1.5600000e-03
  -5.1500000e-03
  -6.0600000e-03
  -4.4400000e-03
  -6.1700000e-03
  -9.2100000e-03
  -7.4300000e-03
  -3.5900000e-03
   3.0000000e-05
  -4.6300000e-03
  -5.0200000e-03
  -4.5800000e-03
  -5.6500000e-03
  -6.2800000e-03
  -8.7500000e-03
  -3.2100000e-03
  -5.0700000e-03
  -6.5800000e-03
  -6.3300000e-03
  -5.2400000e-03
  -3.8700000e-03
  -7.6200000e-03
  -8.5300000e-03
  -7.7900000e-03
  -6.1100000e-03
  -9.3500000e-03
  -5.0400000e-03
  -3.0200000e-03
  -3.4500000e-03
  -7.7600000e-03
  -7.7600000e-03
  -5.7900000e-03
  -6.5300000e-03
  -4.6600000e-03
  -5.8900000e-03
  -7.0700000e-03
  -8.9700000e-03
  -8.0600000e-03
  -6.0000000e-03
  -4.7200000e-03
  -4.2500000e-03
  -5.8900000e-03
  -4.3900000e-03
  -4.9600000e-03
  -6.3600000e-03
  -5.5100000e-03
  -6.3100000e-03
  -5.9800000e-03
  -2.6600000e-03
  -3.3500000e-03
  -2.0000000e-03
  -5.2400000e-03
  -1.5900000e-03
  -3.4000000e-03
  -4.2500000e-03
  -4.4100000e-03
  -7.2900000e-03
  -4.4100000e-03
  -5.1300000e-03
  -3.7600000e-03
  -2.5200000e-03
  -5.7000000e-03
  -6.3100000e-03
  -9.8400000e-03
  -5.8700000e-03
  -4.3300000e-03
  -6.8000000e-03
  -8.0900000e-03
  -6.5800000e-03
  -6.3100000e-03
  -6.5500000e-03
  -5.1000000e-03
  -4.5000000e-03
  -5.3200000e-03
  -5.7300000e-03
  -6.7400000e-03
  -6.9100000e-03
  -7.2900000e-03
  -7.2900000e-03
  -4.8800000e-03
  -2.7400000e-03
  -4.2500000e-03
  -4.5800000e-03
  -5.2100000e-03
  -6.0300000e-03
  -6.5500000e-03
  -6.8300000e-03
  -3.8900000e-03
  -5.6800000e-03
  -5.5100000e-03
  -5.4800000e-03
  -5.6200000e-03
  -1.6700000e-03
  -3.5900000e-03
  -5.6200000e-03
  -3.9800000e-03
  -4.7400000e-03
  -5.3700000e-03
  -9.4000000e-03
  -8.3100000e-03
  -3.8400000e-03
  -4.9900000e-03
  -4.4400000e-03
  -7.4300000e-03
  -7.5100000e-03
  -4.8000000e-03
  -6.0000000e-03
  -5.4600000e-03
  -4.3900000e-03
  -2.4400000e-03
  -6.6400000e-03
  -7.5400000e-03
  -3.6700000e-03
  -2.1900000e-03
  -2.3000000e-03
  -5.0700000e-03
  -5.4300000e-03
  -5.0700000e-03
  -8.1400000e-03
  -6.8500000e-03
  -5.4300000e-03
  -2.8000000e-03
  -4.4700000e-03
  -7.8400000e-03
  -6.1700000e-03
  -4.9400000e-03
  -5.3700000e-03
  -6.2800000e-03
  -8.9100000e-03
  -7.3800000e-03
  -8.7500000e-03
  -7.5100000e-03
  -3.6200000e-03
  -4.6900000e-03
  -3.5900000e-03
  -6.0000000e-03
  -7.9000000e-03
  -6.8000000e-03
  -4.8500000e-03
  -3.3200000e-03
  -5.6800000e-03
  -5.7300000e-03
  -7.4600000e-03
  -5.7300000e-03
  -5.5700000e-03
  -5.0200000e-03
  -2.6300000e-03
  -5.0700000e-03
  -6.7400000e-03
  -8.3400000e-03
  -7.1800000e-03
  -4.0900000e-03
  -6.7200000e-03
  -6.4200000e-03
  -4.3900000e-03
  -5.9200000e-03
  -2.7700000e-03
  -5.6200000e-03
  -6.2200000e-03
  -5.2400000e-03
  -7.5100000e-03
  -5.2900000e-03
  -4.1100000e-03
  -4.1100000e-03
  -3.6200000e-03
  -7.2100000e-03
  -6.7200000e-03
  -6.4400000e-03
  -5.1300000e-03
  -5.2900000e-03
  -5.5900000e-03
  -6.1400000e-03
  -6.1100000e-03
  -6.2200000e-03
  -6.5800000e-03
  -3.6500000e-03
  -2.5000000e-03
  -2.5200000e-03
  -4.0600000e-03
  -5.2100000e-03
  -4.2200000e-03
  -8.9400000e-03
  -7.9200000e-03
  -6.7700000e-03
  -6.5800000e-03
  -5.5900000e-03
  -9.3200000e-03
  -7.4900000e-03
  -3.3500000e-03
  -6.4700000e-03
  -7.0500000e-03
  -7.9000000e-03
  -6.0600000e-03
  -6.4400000e-03
  -6.4400000e-03
  -2.8200000e-03
  -1.7500000e-03
  -5.1300000e-03
  -6.0600000e-03
  -5.1500000e-03
  -3.6700000e-03
  -2.5800000e-03
  -4.7200000e-03
  -4.6100000e-03
  -5.5100000e-03
  -4.4400000e-03
  -4.3300000e-03
  -4.4400000e-03
  -3.5600000e-03
  -5.3200000e-03
  -5.5400000e-03
  -5.1500000e-03
  -3.6700000e-03
  -6.6900000e-03
  -4.9600000e-03
  -4.4700000e-03
  -7.1300000e-03
  -6.3300000e-03
  -5.6800000e-03
  -3.7800000e-03
  -5.6500000e-03
  -5.3500000e-03
  -5.5700000e-03
  -1.0060000e-02
  -8.6400000e-03
  -5.8400000e-03
  -6.5300000e-03
  -4.3300000e-03
  -5.6800000e-03
  -6.2500000e-03
  -5.5100000e-03
  -6.9100000e-03
  -4.8500000e-03
  -6.1100000e-03
  -4.2500000e-03
  -4.5000000e-03
  -5.7600000e-03
  -4.6100000e-03
  -4.3000000e-03
  -5.4300000e-03
  -6.1400000e-03
  -2.8000000e-03
  -5.6500000e-03
  -7.4900000e-03
  -6.1100000e-03
  -4.5000000e-03
  -5.6800000e-03
  -7.1600000e-03
  -5.7000000e-03
  -6.2500000e-03
  -8.5300000e-03
  -6.6100000e-03
  -7.1600000e-03
  -7.0500000e-03
  -7.1000000e-03
  -6.1700000e-03
  -5.9800000e-03
  -4.8300000e-03
  -5.7300000e-03
  -3.8100000e-03
  -5.1300000e-03
  -4.4700000e-03
  -3.6200000e-03
  -5.5100000e-03
  -5.7300000e-03
  -6.0300000e-03
  -8.4400000e-03
  -6.3600000e-03
  -5.6800000e-03
  -4.9900000e-03
  -6.1700000e-03
  -8.4200000e-03
  -7.7300000e-03
  -8.4200000e-03
  -8.4400000e-03
  -4.7400000e-03
  -8.0300000e-03
  -8.0600000e-03
  -4.6600000e-03
  -5.1300000e-03
  -2.9300000e-03
  -3.4300000e-03
  -5.4000000e-03
  -6.0600000e-03
  -8.3900000e-03
  -5.8900000e-03
  -4.6300000e-03
  -5.8700000e-03
  -5.2600000e-03
  -7.5400000e-03
  -6.2500000e-03
  -6.1100000e-03
  -7.1800000e-03
  -5.2900000e-03
  -7.1600000e-03
  -8.8300000e-03
  -8.3100000e-03
  -8.1700000e-03
  -6.0300000e-03
  -6.0300000e-03
  -5.7000000e-03
  -5.7600000e-03
  -7.3200000e-03
  -8.1700000e-03
  -5.1500000e-03
  -6.4700000e-03
  -4.7700000e-03
  -7.3800000e-03
  -8.6100000e-03
  -7.3800000e-03
  -4.4700000e-03
  -2.8200000e-03
  -2.2500000e-03
  -4.2200000e-03
  -5.1300000e-03
  -6.9600000e-03
  -3.4300000e-03
  -4.5200000e-03
  -4.5800000e-03
  -6.3600000e-03
  -5.7000000e-03
  -5.1500000e-03
  -5.6800000e-03
  -3.5100000e-03
  -3.5900000e-03
  -5.7000000e-03
  -7.9500000e-03
  -9.1000000e-03
  -7.9800000e-03
  -5.2100000e-03
  -5.5100000e-03
  -5.3200000e-03
  -6.1100000e-03
  -6.9900000e-03
  -7.8100000e-03
  -8.4400000e-03
  -5.3700000e-03
  -4.4700000e-03
  -7.2400000e-03
  -5.7300000e-03
  -5.8100000e-03
  -5.6200000e-03
  -6.7400000e-03
  -4.9400000e-03
  -3.2100000e-03
  -4.6900000e-03
  -7.0200000e-03
  -6.0600000e-03
  -5.8100000e-03
  -3.7300000e-03
  -4.1400000e-03
  -3.8700000e-03
  -4.7400000e-03
  -6.2000000e-03
  -6.6100000e-03
  -3.4000000e-03
  -3.6500000e-03
  -4.9400000e-03
  -7.4000000e-03
  -5.6800000e-03
  -5.7600000e-03
  -5.1000000e-03
  -3.8700000e-03
  -3.6700000e-03
  -4.8500000e-03
  -5.0200000e-03
  -3.6700000e-03
  -3.3700000e-03
  -5.3200000e-03
  -4.4700000e-03
  -5.6200000e-03
  -5.1300000e-03
  -4.4400000e-03
  -4.6100000e-03
  -6.1100000e-03
  -7.2400000e-03
  -6.2500000e-03
  -6.8300000e-03
  -7.0200000e-03
  -6.3900000e-03
  -5.6200000e-03
  -4.7400000e-03
  -2.8500000e-03
  -2.0000000e-03
  -4.4700000e-03
  -2.9300000e-03
  -4.3600000e-03
  -4.1700000e-03
  -1.1500000e-03
  -2.4700000e-03
  -4.5000000e-03
  -6.2500000e-03
  -5.0200000e-03
  -2.0600000e-03
  -4.1400000e-03
  -3.5400000e-03
  -2.4400000e-03
  -6.6100000e-03
  -5.0200000e-03
  -5.4600000e-03
  -3.7800000e-03
  -5.2400000e-03
  -6.4700000e-03
  -4.9400000e-03
  -5.1800000e-03
  -4.1900000e-03
  -3.9500000e-03
  -4.3900000e-03
  -5.0400000e-03
  -4.5800000e-03
  -7.9800000e-03
  -2.5800000e-03
  -3.3700000e-03
  -6.0000000e-03
  -5.3500000e-03
  -5.4800000e-03
  -1.1000000e-03
  -5.4300000e-03
  -5.8900000e-03
  -4.2200000e-03
  -5.0700000e-03
  -3.4500000e-03
  -4.8500000e-03
  -4.1000000e-04
  -9.0000000e-04
  -4.1400000e-03
  -5.2900000e-03
  -3.9200000e-03
  -3.0400000e-03
  -1.5100000e-03
  -6.0900000e-03
  -5.2400000e-03
  -6.3100000e-03
  -6.3600000e-03
  -4.3600000e-03
  -5.8700000e-03
  -3.9500000e-03
  -5.6800000e-03
  -8.2500000e-03
  -4.9900000e-03
  -5.4000000e-03
  -4.9900000e-03
  -3.3700000e-03
  -3.9500000e-03
  -3.3200000e-03
  -4.5000000e-03
  -4.5000000e-03
  -3.6700000e-03
  -3.3700000e-03
  -2.8500000e-03
  -4.3600000e-03
  -6.0300000e-03
  -4.6300000e-03
  -3.2400000e-03
  -4.4400000e-03
  -3.5900000e-03
  -3.7000000e-03
  -4.5200000e-03
  -4.1700000e-03
  -3.7000000e-03
  -4.1900000e-03
  -6.2200000e-03
  -6.8300000e-03
  -7.1000000e-03
  -3.1800000e-03
  -2.8500000e-03
  -4.2200000e-03
  -5.0700000e-03
  -4.0900000e-03
  -4.2800000e-03
  -5.5900000e-03
  -5.1500000e-03
  -4.8500000e-03
  -5.7600000e-03
  -4.3600000e-03
  -1.4500000e-03
  -3.8400000e-03
  -4.7400000e-03
  -7.3800000e-03
  -4.6600000e-03
  -3.5900000e-03
  -3.4000000e-03
  -4.4400000e-03
  -7.6500000e-03
  -6.2000000e-03
  -7.6200000e-03
  -8.2000000e-03
  -2.8000000e-03
  -3.0400000e-03
  -2.3600000e-03
  -5.6800000e-03
  -6.6100000e-03
  -5.0700000e-03
  -5.5900000e-03
  -1.7000000e-03
  -3.8400000e-03
  -4.9100000e-03
  -1.8400000e-03
  -5.5700000e-03
  -4.5500000e-03
  -1.9200000e-03
  -3.6700000e-03
  -3.8900000e-03
  -9.2900000e-03
  -7.0500000e-03
  -5.3200000e-03
  -4.7200000e-03
  -3.1000000e-03
  -7.2100000e-03
  -3.7300000e-03
  -3.8100000e-03
  -7.4600000e-03
  -3.2100000e-03
  -1.2300000e-03
  -3.5400000e-03
  -4.8300000e-03
  -7.8400000e-03
  -2.6900000e-03
  -3.3200000e-03
  -4.2200000e-03
  -2.5000000e-03
  -4.0000000e-03
  -4.2500000e-03
  -6.9400000e-03
  -4.8500000e-03
  -2.0600000e-03
  -3.8700000e-03
  -4.6900000e-03
  -6.9400000e-03
  -4.8300000e-03
  -4.6900000e-03
  -4.8800000e-03
  -2.9100000e-03
  -1.4000000e-03
  -3.2400000e-03
  -6.9900000e-03
  -7.5400000e-03
  -3.1500000e-03
  -3.6500000e-03
  -3.6500000e-03
  -3.1000000e-03
  -2.7400000e-03
  -4.7400000e-03
  -5.5900000e-03
  -3.8700000e-03
  -3.5600000e-03
  -1.5100000e-03
  -3.8900000e-03
  -4.9400000e-03
  -4.0300000e-03
  -2.7400000e-03
  -4.9900000e-03
  -7.2900000e-03
  -5.0400000e-03
  -3.4500000e-03
  -4.8800000e-03
  -4.4100000e-03
  -4.4400000e-03
  -4.8500000e-03
  -3.8400000e-03
  -6.4700000e-03
  -2.9900000e-03
  -2.9900000e-03
  -4.8000000e-03
  -5.5100000e-03
  -5.3200000e-03
  -2.6000000e-03
  -3.7000000e-03
  -7.1600000e-03
  -4.7200000e-03
  -3.6200000e-03
  -4.4700000e-03
  -4.3000000e-03
  -4.7200000e-03
  -2.6300000e-03
  -4.4400000e-03
  -7.2900000e-03
  -1.7300000e-03
  -1.2600000e-03
  -2.1100000e-03
  -5.7300000e-03
  -4.4400000e-03
  -2.2200000e-03
  -4.2500000e-03
  -8.4400000e-03
  -3.5100000e-03
  -5.4600000e-03
  -5.1800000e-03
  -5.8100000e-03
  -7.4000000e-03
  -3.8900000e-03
  -4.3300000e-03
  -5.2600000e-03
  -4.5200000e-03
  -6.6600000e-03
  -6.7200000e-03
  -6.9100000e-03
  -5.8900000e-03
  -9.9000000e-04
  -3.7800000e-03
  -3.3200000e-03
  -4.4400000e-03
  -5.9500000e-03
  -3.4300000e-03
  -2.3300000e-03
  -3.9800000e-03
  -8.6400000e-03
  -7.9500000e-03
  -3.8900000e-03
  -4.6600000e-03
  -5.5100000e-03
  -4.7700000e-03
  -3.9500000e-03
  -6.2500000e-03
  -6.7400000e-03
  -4.9400000e-03
  -3.3500000e-03
  -6.5000000e-03
  -7.2400000e-03
  -3.7000000e-03
  -2.8200000e-03
  -2.7400000e-03
  -7.4000000e-03
  -4.1400000e-03
  -2.2800000e-03
  -4.6100000e-03
  -7.2700000e-03
  -7.4300000e-03
  -5.9500000e-03
  -6.4200000e-03
  -7.6800000e-03
  -2.2200000e-03
  -2.4400000e-03
  -3.6200000e-03
  -3.2900000e-03
  -5.2100000e-03
  -4.7200000e-03
  -8.0300000e-03
  -3.4800000e-03
  -3.5400000e-03
  -5.6200000e-03
  -4.5200000e-03
  -7.3200000e-03
  -2.7700000e-03
  -3.3700000e-03
  -1.6500000e-03
  -1.1200000e-03
  -5.5100000e-03
  -4.6600000e-03
  -6.3300000e-03
  -4.2500000e-03
  -2.7100000e-03
  -5.2900000e-03
  -2.3900000e-03
  -2.9300000e-03
  -3.4500000e-03
  -3.4000000e-03
  -5.2100000e-03
  -2.8000000e-03
  -4.9600000e-03
  -6.9400000e-03
  -2.9300000e-03
  -5.2600000e-03
  -3.3700000e-03
  -3.8100000e-03
  -4.6300000e-03
  -5.6500000e-03
  -4.2800000e-03
  -2.9300000e-03
  -3.1800000e-03
  -7.8700000e-03
  -4.9600000e-03
  -3.7000000e-03
  -3.6500000e-03
  -2.0300000e-03
  -2.6900000e-03
  -4.9000000e-04
  -3.4800000e-03
  -5.1800000e-03
  -4.7400000e-03
  -4.4100000e-03
  -1.4300000e-03
  -6.0600000e-03
  -5.6500000e-03
  -5.0700000e-03
  -1.9500000e-03
  -4.4700000e-03
  -2.4700000e-03
  -1.7300000e-03
  -2.4700000e-03
  -2.9900000e-03
  -5.7000000e-03
  -5.4000000e-03
  -5.2600000e-03
  -5.4300000e-03
  -3.2900000e-03
  -3.8400000e-03
  -3.9800000e-03
  -5.8700000e-03
  -7.1300000e-03
  -5.0700000e-03
  -5.9800000e-03
  -5.6500000e-03
  -4.4700000e-03
  -5.4300000e-03
  -3.2100000e-03
  -3.1800000e-03
  -3.7300000e-03
  -3.7800000e-03
  -4.1400000e-03
  -3.6500000e-03
  -2.3300000e-03
  -3.7000000e-03
  -4.6900000e-03
  -6.6400000e-03
  -6.3300000e-03
  -4.2800000e-03
  -2.6600000e-03
  -3.3500000e-03
  -3.1500000e-03
  -5.5900000e-03
  -5.2100000e-03
  -5.7600000e-03
  -4.2800000e-03
  -1.2300000e-03
  -3.7800000e-03
  -3.7300000e-03
  -2.3300000e-03
  -3.5600000e-03
  -2.9900000e-03
  -4.3300000e-03
  -2.3900000e-03
  -2.3600000e-03
  -5.6200000e-03
  -4.4700000e-03
  -6.3300000e-03
  -5.3500000e-03
  -1.4000000e-03
  -2.3000000e-03
  -1.6700000e-03
  -2.5200000e-03
  -3.8400000e-03
  -4.0900000e-03
  -4.7200000e-03
  -1.2900000e-03
  -5.7300000e-03
  -5.8700000e-03
  -3.6500000e-03
  -3.1800000e-03
  -2.4400000e-03
  -3.4800000e-03
  -5.6200000e-03
  -4.2500000e-03
  -3.5400000e-03
  -3.4800000e-03
  -4.0900000e-03
  -3.4300000e-03
  -5.8700000e-03
  -3.5100000e-03
  -5.0700000e-03
  -3.5100000e-03
  -3.2100000e-03
  -5.2100000e-03
  -2.5800000e-03
  -5.1800000e-03
  -2.9100000e-03
  -7.6500000e-03
  -6.6400000e-03
  -3.2600000e-03
  -3.3500000e-03
  -4.3000000e-03
  -4.5000000e-03
  -6.0300000e-03
  -4.1700000e-03
  -4.9900000e-03
  -5.5100000e-03
  -3.6500000e-03
  -4.8800000e-03
  -5.2900000e-03
  -4.5500000e-03
  -3.2100000e-03
  -2.9100000e-03
  -5.1500000e-03
  -3.8400000e-03
  -3.0400000e-03
  -4.8000000e-03
  -7.0200000e-03
  -3.3700000e-03
  -2.9900000e-03
  -2.7400000e-03
  -6.2000000e-03
  -6.8300000e-03
  -5.4000000e-03
  -5.4300000e-03
  -4.5800000e-03
  -9.0000000e-04
  -1.7000000e-03
  -5.2900000e-03
  -7.1600000e-03
  -5.8100000e-03
  -4.1100000e-03
  -6.3600000e-03
  -2.3000000e-03
  -3.1800000e-03
  -5.5400000e-03
  -6.4200000e-03
  -8.8300000e-03
  -3.2900000e-03
  -5.4300000e-03
  -2.0600000e-03
  -3.4800000e-03
  -6.4200000e-03
  -5.4300000e-03
  -4.5800000e-03
  -3.9500000e-03
  -3.7300000e-03
  -4.9900000e-03
  -4.5500000e-03
  -6.2000000e-03
  -6.0900000e-03
  -3.9200000e-03
  -3.4300000e-03
  -3.5600000e-03
  -7.4300000e-03
  -9.3500000e-03
  -3.0200000e-03
  -4.6600000e-03
  -5.9500000e-03
  -7.9800000e-03
  -3.2600000e-03
  -3.9500000e-03
  -7.2900000e-03
  -6.6400000e-03
  -2.5500000e-03
  -4.2500000e-03
  -4.6300000e-03
  -5.4300000e-03
  -3.0400000e-03
  -3.9200000e-03
  -7.1300000e-03
  -4.3000000e-03
  -4.3600000e-03
  -6.2000000e-03
  -6.0000000e-03
  -6.0300000e-03
  -2.8800000e-03
  -4.4100000e-03
  -6.5000000e-03
  -6.3900000e-03
  -6.7700000e-03
  -4.6100000e-03
  -4.1900000e-03
  -4.2500000e-03
  -1.8400000e-03
  -6.8800000e-03
  -6.3300000e-03
  -4.6600000e-03
  -4.1700000e-03
  -4.8000000e-03
  -5.7900000e-03
  -4.7400000e-03
  -6.1400000e-03
  -5.6500000e-03
  -4.9400000e-03
  -3.8700000e-03
  -4.0900000e-03
  -4.2200000e-03
  -4.0900000e-03
  -3.9500000e-03
  -5.5100000e-03
  -4.6900000e-03
  -6.7700000e-03
  -3.3700000e-03
  -4.7400000e-03
  -8.0600000e-03
  -6.9100000e-03
  -5.5900000e-03
  -2.0800000e-03
  -5.0200000e-03
  -4.9100000e-03
  -5.3200000e-03
  -6.7700000e-03
  -4.1700000e-03
  -3.8400000e-03
  -2.1700000e-03
  -2.8500000e-03
  -3.8100000e-03
  -5.6200000e-03
  -4.7700000e-03
  -2.8500000e-03
  -3.7300000e-03
  -6.5500000e-03
  -5.2600000e-03
  -6.1700000e-03
  -3.9800000e-03
  -5.1300000e-03
  -4.8800000e-03
  -3.4000000e-03
  -2.9100000e-03
  -4.4700000e-03
  -6.5300000e-03
  -6.3600000e-03
  -5.6800000e-03
  -4.7400000e-03
  -3.7800000e-03
  -4.2200000e-03
  -3.8900000e-03
  -8.5800000e-03
  -5.3700000e-03
  -2.6900000e-03
  -2.8200000e-03
  -6.0300000e-03
  -6.3600000e-03
  -5.8700000e-03
  -4.4400000e-03
  -5.7600000e-03
  -3.2900000e-03
  -2.7400000e-03
  -4.7700000e-03
  -5.4300000e-03
  -4.8800000e-03
  -3.4500000e-03
  -2.7700000e-03
  -6.7200000e-03
  -7.5100000e-03
  -6.8300000e-03
  -5.8100000e-03
  -5.7000000e-03
  -5.5700000e-03
  -3.3500000e-03
  -5.4000000e-03
  -6.5300000e-03
  -5.6200000e-03
  -5.7600000e-03
  -6.1400000e-03
  -4.3900000e-03
  -6.3100000e-03
  -4.4700000e-03
  -2.0800000e-03
  -7.2100000e-03
  -5.5100000e-03
  -6.2200000e-03
  -5.4800000e-03
  -5.2600000e-03
  -6.3300000e-03
  -5.4000000e-03
  -4.1900000e-03
  -7.2400000e-03
  -3.0400000e-03
  -5.8100000e-03
  -2.9600000e-03
  -2.9100000e-03
  -6.9100000e-03
  -2.9100000e-03
  -5.6500000e-03
  -6.8800000e-03
  -6.2500000e-03
  -7.9000000e-03
  -3.8700000e-03
  -7.7300000e-03
  -8.7500000e-03
  -6.8300000e-03
  -4.5500000e-03
  -4.6100000e-03
  -6.2000000e-03
  -6.1100000e-03
  -4.2200000e-03
  -4.2500000e-03
  -6.0300000e-03
  -3.6200000e-03
  -2.9100000e-03
  -2.3600000e-03
  -5.0700000e-03
  -5.7000000e-03
  -2.3600000e-03
  -3.9500000e-03
  -6.8300000e-03
  -6.4400000e-03
  -6.9600000e-03
  -4.9900000e-03
  -3.0200000e-03
  -4.2200000e-03
  -5.3700000e-03
  -7.4300000e-03
  -4.3000000e-03
  -2.6900000e-03
  -2.7700000e-03
  -3.4800000e-03
  -3.8700000e-03
  -5.1800000e-03
  -5.2400000e-03
  -4.1700000e-03
  -5.6200000e-03
  -3.1500000e-03
  -6.1400000e-03
  -6.9400000e-03
  -6.7400000e-03
  -5.5900000e-03
  -4.4700000e-03
  -5.4000000e-03
  -3.1800000e-03
  -1.0100000e-03
  -3.5400000e-03
  -6.3100000e-03
  -2.6000000e-03
  -2.7700000e-03
  -2.2000000e-04
  -1.8100000e-03
  -3.9800000e-03
  -5.7300000e-03
  -7.8700000e-03
  -5.7000000e-03
  -4.9100000e-03
  -6.4700000e-03
  -4.0600000e-03
  -6.1100000e-03
  -7.9500000e-03
  -3.7300000e-03
  -6.3300000e-03
  -3.5600000e-03
  -3.9200000e-03
  -5.6500000e-03
  -1.5600000e-03
  -3.7800000e-03
  -2.7100000e-03
  -5.4800000e-03
  -7.7000000e-03
  -3.9500000e-03
  -5.1500000e-03
  -5.1000000e-03
  -2.8800000e-03
  -4.2500000e-03
  -7.2400000e-03
  -7.6500000e-03
  -5.7600000e-03
  -1.2100000e-03
  -6.2000000e-03
  -3.6500000e-03
  -1.7500000e-03
  -4.6900000e-03
  -4.2800000e-03
  -6.9100000e-03
  -3.1300000e-03
  -2.2200000e-03
  -6.6100000e-03
  -7.2900000e-03
  -6.2000000e-03
  -4.2800000e-03
  -7.5700000e-03
  -8.1700000e-03
  -2.7700000e-03
  -3.0700000e-03
  -7.6500000e-03
  -6.8800000e-03
  -4.4400000e-03
  -3.5400000e-03
  -4.7700000e-03
  -4.8500000e-03
  -4.5000000e-03
  -5.3200000e-03
  -4.7400000e-03
  -6.1400000e-03
  -2.4100000e-03
  -4.6900000e-03
  -7.9800000e-03
  -7.9200000e-03
  -7.3800000e-03
  -5.3700000e-03
  -5.1500000e-03
  -6.3600000e-03
  -3.9200000e-03
  -7.7600000e-03
  -4.0600000e-03
  -4.8000000e-03
  -3.8700000e-03
  -4.6100000e-03
