# Supplementary material for: A Novel Classification Method for Flutter Signals Based on the CNN and STFT
Source: Hindawi journal article supplement (doi:10.1155/2019/9375437), 2019-04-09
Supplement: f1 [file 9375437.f1.zip › 00_25_z15.0_14channel.txt]

   6.0000000e-04
  -3.2100000e-03
  -9.4600000e-03
  -1.0090000e-02
   1.4300000e-03
   5.2400000e-03
   3.0000000e-05
   4.7200000e-03
   2.8200000e-03
   7.7000000e-04
  -5.8700000e-03
  -1.1130000e-02
  -8.1700000e-03
  -1.2010000e-02
  -1.7550000e-02
  -1.6590000e-02
  -5.5100000e-03
   1.2900000e-03
  -9.6200000e-03
  -1.4390000e-02
  -8.3900000e-03
  -9.4000000e-03
  -1.3760000e-02
  -1.3430000e-02
  -9.9500000e-03
  -4.2200000e-03
  -4.9400000e-03
  -1.4480000e-02
  -8.3900000e-03
  -1.3080000e-02
  -1.3190000e-02
  -1.4530000e-02
  -4.3600000e-03
  -1.5100000e-03
  -9.3200000e-03
  -5.2900000e-03
  -3.4300000e-03
  -4.8500000e-03
  -1.5380000e-02
  -1.8920000e-02
  -1.3190000e-02
  -1.3520000e-02
  -2.0540000e-02
  -1.9000000e-02
  -1.8100000e-03
   5.3500000e-03
  -1.9360000e-02
  -3.4300000e-02
  -2.6760000e-02
  -1.5270000e-02
  -1.2060000e-02
  -1.6560000e-02
  -1.3930000e-02
  -1.5350000e-02
  -1.3330000e-02
  -1.3870000e-02
  -3.2900000e-02
  -3.9650000e-02
  -3.8110000e-02
  -2.9940000e-02
  -2.2350000e-02
  -9.0500000e-03
  -3.6300000e-02
  -2.6050000e-02
  -1.6120000e-02
  -1.9930000e-02
  -1.8890000e-02
  -2.2890000e-02
  -1.9770000e-02
  -1.5270000e-02
  -1.7580000e-02
  -1.0990000e-02
  -7.3500000e-03
  -1.0230000e-02
  -1.1430000e-02
  -1.1240000e-02
  -1.1630000e-02
  -3.9200000e-03
   2.2500000e-03
  -2.1700000e-03
   4.5800000e-03
   5.0700000e-03
  -4.9400000e-03
   4.6900000e-03
   4.4700000e-03
   1.1270000e-02
   2.1100000e-03
  -6.2500000e-03
   5.1300000e-03
   4.4100000e-03
   1.5900000e-03
  -4.2800000e-03
   1.8400000e-03
   5.9500000e-03
  -8.2000000e-04
   1.5100000e-03
   7.7000000e-04
  -3.0200000e-03
  -4.8800000e-03
  -2.3000000e-03
   6.4200000e-03
   4.0000000e-03
   2.1400000e-03
  -5.3500000e-03
   5.0000000e-05
   3.8100000e-03
  -1.4800000e-03
  -8.3900000e-03
  -7.6200000e-03
  -2.0000000e-03
  -4.1400000e-03
  -1.6000000e-04
   3.1800000e-03
   1.8400000e-03
  -4.1900000e-03
  -3.9800000e-03
   1.0060000e-02
   6.1700000e-03
  -2.6000000e-03
  -5.6200000e-03
   4.5000000e-03
   1.0340000e-02
   3.5400000e-03
   1.9000000e-04
   1.1730000e-02
   4.6600000e-03
  -2.7400000e-03
  -1.0280000e-02
  -2.7700000e-03
   2.6600000e-03
  -2.9600000e-03
  -2.2800000e-03
   1.8900000e-03
  -1.4300000e-03
  -8.0000000e-04
  -1.4000000e-04
   6.9600000e-03
   1.1100000e-02
  -8.9100000e-03
  -1.0400000e-03
   6.2200000e-03
   6.2800000e-03
   3.0400000e-03
  -1.7030000e-02
  -1.6070000e-02
  -1.5050000e-02
  -8.8000000e-04
   5.2900000e-03
   3.3500000e-03
   2.6000000e-03
  -8.5000000e-04
   6.8000000e-03
   1.3790000e-02
   1.4750000e-02
  -1.2100000e-03
   1.1800000e-03
   6.9100000e-03
   3.6200000e-03
  -5.4300000e-03
  -1.4000000e-03
   1.0200000e-02
   2.6000000e-03
  -4.6900000e-03
   1.1000000e-04
   6.2200000e-03
   3.3500000e-03
   7.1000000e-04
  -1.4000000e-03
  -2.2000000e-04
  -1.1500000e-03
   5.2000000e-04
  -1.9200000e-03
  -2.3600000e-03
   8.0000000e-05
  -7.1000000e-04
  -7.3800000e-03
   3.0000000e-04
   5.2400000e-03
  -7.8400000e-03
  -3.1800000e-03
   3.9500000e-03
   3.0700000e-03
  -6.2000000e-03
  -3.2100000e-03
   7.9800000e-03
   7.0500000e-03
   4.0000000e-03
   6.3000000e-04
   8.5000000e-03
   3.6200000e-03
   6.2500000e-03
   6.3000000e-04
   3.6200000e-03
   1.0280000e-02
   1.0400000e-03
  -2.6000000e-03
   5.4000000e-03
   5.3500000e-03
  -6.9900000e-03
  -2.5140000e-02
  -2.0450000e-02
  -1.7000000e-02
  -2.8080000e-02
  -1.5820000e-02
  -2.1400000e-03
  -3.8000000e-04
  -5.3700000e-03
  -9.2100000e-03
  -3.5400000e-03
  -2.5500000e-03
   2.5200000e-03
   5.5400000e-03
   2.8500000e-03
   2.1900000e-03
  -9.3800000e-03
  -1.1200000e-03
   5.1800000e-03
   4.5500000e-03
  -4.3900000e-03
  -4.2800000e-03
   9.7300000e-03
   8.6100000e-03
  -2.6000000e-03
  -1.0170000e-02
  -6.8300000e-03
  -3.3000000e-04
  -7.5700000e-03
  -6.8300000e-03
   2.0600000e-03
  -2.5200000e-03
  -5.8400000e-03
  -6.1700000e-03
   6.7400000e-03
   3.0400000e-03
  -3.8100000e-03
  -2.4100000e-03
  -6.0000000e-04
   1.9200000e-03
  -9.0000000e-04
  -3.7800000e-03
  -1.5100000e-03
  -4.3000000e-03
   1.9200000e-03
   5.1500000e-03
   9.7900000e-03
   4.5800000e-03
  -6.6000000e-04
  -3.7000000e-03
  -1.1200000e-03
   5.1500000e-03
  -1.6500000e-03
   2.5000000e-03
   8.6100000e-03
   1.3400000e-03
  -3.0200000e-03
  -4.7700000e-03
   1.5600000e-03
   7.3800000e-03
  -3.2100000e-03
  -5.3700000e-03
   2.5200000e-03
  -3.5400000e-03
  -1.9200000e-03
   1.8900000e-03
   1.3110000e-02
   7.0200000e-03
  -8.8000000e-03
  -1.1240000e-02
  -1.7800000e-03
  -3.4800000e-03
   1.1000000e-04
  -6.5000000e-03
  -2.6300000e-03
   1.6700000e-03
  -5.4600000e-03
  -6.6900000e-03
  -3.6200000e-03
  -1.5600000e-03
  -9.6000000e-04
   2.0300000e-03
   3.4800000e-03
  -5.6800000e-03
  -1.0990000e-02
  -5.6500000e-03
   3.8700000e-03
   2.9300000e-03
  -4.3000000e-03
  -3.6700000e-03
   2.6000000e-03
  -2.3600000e-03
  -3.4000000e-03
  -2.2500000e-03
  -2.0000000e-03
   1.4800000e-03
  -4.3300000e-03
   6.9000000e-04
   8.2300000e-03
   3.7800000e-03
  -2.3300000e-03
  -9.8700000e-03
  -1.9000000e-04
   2.3600000e-03
  -2.7700000e-03
  -7.7000000e-04
   2.0800000e-03
   1.5400000e-03
  -3.2400000e-03
   1.0100000e-03
   9.1300000e-03
   1.3400000e-03
  -7.5400000e-03
  -1.4000000e-03
   3.3200000e-03
   3.2400000e-03
  -5.7000000e-03
  -6.2800000e-03
  -3.3000000e-04
  -3.9500000e-03
  -1.3200000e-03
  -5.8900000e-03
   2.9900000e-03
  -9.9000000e-04
  -6.8800000e-03
   3.3500000e-03
   1.0140000e-02
   2.8000000e-03
  -7.9500000e-03
   3.8900000e-03
   1.1710000e-02
   6.1700000e-03
  -6.3300000e-03
  -3.7300000e-03
  -2.2500000e-03
  -6.1400000e-03
  -4.4000000e-04
  -2.5500000e-03
  -3.0000000e-04
   1.8230000e-02
   1.6700000e-02
   1.8420000e-02
   9.1300000e-03
  -4.5200000e-03
  -1.7000000e-03
  -4.2500000e-03
   4.7000000e-04
  -2.6900000e-03
  -7.9200000e-03
   1.8600000e-03
  -1.1000000e-04
  -2.9600000e-03
  -3.7000000e-03
   1.3400000e-03
   2.9100000e-03
  -4.7700000e-03
  -6.3600000e-03
  -2.4100000e-03
   6.8000000e-03
   4.5200000e-03
   1.6200000e-03
  -6.6600000e-03
  -2.9100000e-03
   8.0000000e-04
  -4.5200000e-03
   1.5400000e-03
   1.7000000e-03
  -4.5800000e-03
  -8.0300000e-03
  -7.2900000e-03
  -2.3630000e-02
  -2.4900000e-02
  -2.8600000e-02
  -1.0940000e-02
  -7.9500000e-03
  -1.8370000e-02
  -8.9100000e-03
  -2.6000000e-03
   8.5000000e-04
   2.0000000e-03
  -9.5700000e-03
  -4.5800000e-03
  -4.4100000e-03
  -6.3600000e-03
  -8.5500000e-03
  -6.0600000e-03
   6.1400000e-03
  -1.1800000e-03
  -3.5900000e-03
  -4.4700000e-03
  -3.0000000e-05
  -8.2000000e-04
  -6.8800000e-03
   9.6000000e-04
  -1.6500000e-03
  -5.1300000e-03
  -1.4640000e-02
  -8.8800000e-03
   3.9200000e-03
   1.9700000e-03
  -2.1700000e-03
  -3.6500000e-03
   3.4500000e-03
  -2.0800000e-03
  -8.9900000e-03
  -1.4500000e-03
   5.1000000e-03
  -5.0400000e-03
  -4.6300000e-03
   4.8800000e-03
   3.0200000e-03
  -2.1400000e-03
  -7.0500000e-03
  -1.0310000e-02
  -3.0000000e-05
  -6.0300000e-03
  -4.0300000e-03
   2.7400000e-03
  -1.6700000e-03
  -3.3000000e-04
  -5.0200000e-03
  -6.0300000e-03
   4.8000000e-03
  -7.1000000e-04
  -4.5200000e-03
  -3.1500000e-03
   3.7000000e-03
   3.4300000e-03
  -2.0800000e-03
   2.2000000e-04
   2.0300000e-03
   3.6500000e-03
  -1.0700000e-03
  -5.3200000e-03
  -1.8400000e-03
  -4.2800000e-03
  -2.3900000e-03
   2.4700000e-03
  -1.4500000e-03
  -3.3200000e-03
  -5.1300000e-03
  -1.8100000e-03
   3.9800000e-03
  -1.7300000e-03
  -4.1700000e-03
  -3.8400000e-03
   6.3900000e-03
   4.4100000e-03
  -4.2200000e-03
  -7.1000000e-04
   5.2100000e-03
   5.0700000e-03
  -1.9500000e-03
  -2.3300000e-03
   1.9000000e-04
  -6.7200000e-03
  -1.0280000e-02
  -6.0300000e-03
  -7.2400000e-03
  -7.6500000e-03
  -6.3300000e-03
  -4.0900000e-03
   9.3000000e-04
  -6.3300000e-03
  -6.6400000e-03
  -2.7100000e-03
   1.3400000e-03
  -1.1800000e-03
  -1.2060000e-02
  -5.8400000e-03
  -1.6700000e-03
  -5.2400000e-03
  -2.3000000e-03
  -3.2400000e-03
  -1.7000000e-03
  -6.2200000e-03
  -1.1160000e-02
   2.0600000e-03
   7.1000000e-04
  -8.2000000e-04
  -6.8500000e-03
  -1.0890000e-02
  -1.1800000e-03
  -7.1000000e-03
  -1.0040000e-02
  -6.3300000e-03
  -5.0000000e-05
  -3.2600000e-03
  -1.0830000e-02
  -1.2610000e-02
  -1.6500000e-03
   1.9200000e-03
  -1.4010000e-02
  -3.8100000e-03
  -8.0000000e-05
  -8.8000000e-04
   1.0700000e-03
   2.7100000e-03
   6.8000000e-03
  -2.5800000e-03
  -6.0000000e-03
   3.3700000e-03
   2.0600000e-03
  -5.5000000e-04
  -4.7400000e-03
  -5.5700000e-03
   2.7400000e-03
   2.8800000e-03
  -1.1520000e-02
  -1.0580000e-02
  -2.5000000e-04
  -2.5800000e-03
  -6.0300000e-03
  -3.0000000e-05
   4.4100000e-03
   2.2200000e-03
  -2.3000000e-03
  -1.1800000e-03
   2.7400000e-03
   4.9900000e-03
   2.5000000e-03
   1.5400000e-03
   2.0000000e-03
   5.3700000e-03
  -1.0100000e-03
  -6.3000000e-04
   1.1300000e-02
   4.3600000e-03
  -1.9000000e-04
  -4.4000000e-04
   4.8800000e-03
   3.9200000e-03
  -4.9400000e-03
  -2.3900000e-03
   3.0400000e-03
   3.3500000e-03
   1.9000000e-04
   3.3500000e-03
   9.9000000e-04
  -8.1700000e-03
  -6.6100000e-03
   9.0000000e-04
   3.9500000e-03
   6.5500000e-03
  -6.3900000e-03
  -6.7700000e-03
   5.0000000e-05
   1.1800000e-03
  -2.3900000e-03
  -3.6200000e-03
   7.2400000e-03
   3.8100000e-03
  -1.4000000e-04
   7.2700000e-03
   2.7400000e-03
  -2.5000000e-04
  -3.0700000e-03
   6.3600000e-03
   1.3870000e-02
   1.4000000e-03
   1.4000000e-03
   1.4500000e-03
   5.7600000e-03
   3.7800000e-03
  -3.7800000e-03
   2.4700000e-03
   6.2000000e-03
   7.7000000e-04
   2.9600000e-03
   3.9800000e-03
   5.3200000e-03
  -1.8900000e-03
  -3.4500000e-03
   8.2000000e-04
  -1.8900000e-03
  -3.0400000e-03
   8.0000000e-04
   3.0000000e-05
   7.4300000e-03
   4.0600000e-03
   1.2100000e-03
   5.9500000e-03
   3.1000000e-03
  -1.5100000e-03
  -8.0300000e-03
  -3.7800000e-03
   2.9100000e-03
   4.5800000e-03
   1.8900000e-03
  -6.9000000e-04
  -8.8000000e-04
  -6.7400000e-03
  -3.3200000e-03
   8.9400000e-03
   1.0530000e-02
   8.0600000e-03
   1.1800000e-03
   2.9100000e-03
   6.0000000e-03
  -3.7300000e-03
  -1.1210000e-02
  -3.7600000e-03
   6.5000000e-03
  -1.0830000e-02
  -1.9000000e-02
  -2.0480000e-02
  -1.1730000e-02
   1.0400000e-03
  -2.6000000e-03
  -9.3000000e-04
  -2.8800000e-03
  -8.0000000e-05
  -5.8700000e-03
  -2.1900000e-03
   2.9900000e-03
  -2.2500000e-03
  -6.2000000e-03
   4.2200000e-03
   1.0990000e-02
   4.0900000e-03
  -1.3700000e-03
   2.4400000e-03
   1.6000000e-04
  -7.3500000e-03
  -4.3000000e-03
   7.7000000e-03
   8.3900000e-03
   4.9000000e-04
  -5.9500000e-03
  -9.6000000e-04
   5.7900000e-03
   4.4000000e-04
  -4.0000000e-03
  -3.9800000e-03
   3.7300000e-03
   3.4500000e-03
   5.5000000e-04
   7.1000000e-04
   5.7000000e-03
   8.2000000e-04
  -6.5000000e-03
  -5.5000000e-04
  -6.0300000e-03
  -1.1760000e-02
  -1.7220000e-02
  -1.6510000e-02
  -9.4600000e-03
   3.3000000e-04
  -6.8000000e-03
  -1.3700000e-03
   7.0500000e-03
   1.8600000e-03
  -3.4000000e-03
  -3.2900000e-03
   2.2800000e-03
  -1.4800000e-03
   4.2500000e-03
   6.7400000e-03
   7.7000000e-04
  -3.0000000e-04
  -5.0400000e-03
   2.9900000e-03
   3.8700000e-03
  -1.5400000e-03
   4.4000000e-04
   4.0300000e-03
   7.5900000e-03
  -4.7000000e-04
  -5.5900000e-03
   1.0400000e-03
   3.6200000e-03
   1.7660000e-02
   9.7600000e-03
  -2.7700000e-03
   2.4400000e-03
  -4.2800000e-03
   9.9000000e-04
   1.1200000e-03
   7.1600000e-03
   6.2500000e-03
   7.2100000e-03
   8.1700000e-03
   5.4600000e-03
   1.4800000e-03
   1.3700000e-03
   2.8500000e-03
   1.0690000e-02
  -6.3000000e-04
  -4.6900000e-03
   1.4000000e-04
  -4.2500000e-03
   4.2800000e-03
  -2.0600000e-03
   2.0600000e-03
   6.2000000e-03
   4.7000000e-04
   1.0700000e-03
  -1.8400000e-03
  -2.7000000e-04
  -5.5900000e-03
  -6.9900000e-03
   5.6200000e-03
   6.7200000e-03
  -3.2100000e-03
  -1.2500000e-02
  -6.6600000e-03
   2.1900000e-03
   3.0000000e-05
  -7.6500000e-03
  -3.9200000e-03
  -5.5900000e-03
  -2.4100000e-03
  -8.0600000e-03
   9.9000000e-04
   7.8400000e-03
   1.1000000e-04
  -6.7200000e-03
  -1.3650000e-02
  -9.4300000e-03
  -8.0600000e-03
  -3.8700000e-03
  -1.4300000e-03
  -3.7300000e-03
  -1.3350000e-02
  -1.7140000e-02
  -4.1100000e-03
   4.8000000e-03
  -1.8100000e-03
  -8.4700000e-03
  -5.7600000e-03
   7.7000000e-04
  -2.1700000e-03
  -7.0700000e-03
  -9.1000000e-03
  -6.8800000e-03
  -6.8800000e-03
  -2.9300000e-03
   2.8000000e-03
   7.6200000e-03
  -1.3700000e-03
  -9.7100000e-03
  -6.5800000e-03
  -2.0600000e-03
   4.9000000e-04
  -1.3980000e-02
  -1.1950000e-02
  -5.2600000e-03
  -9.1900000e-03
  -7.3500000e-03
  -8.0100000e-03
  -3.5100000e-03
  -3.4500000e-03
  -2.2800000e-03
   3.2400000e-03
  -3.3000000e-04
  -5.4300000e-03
  -1.0310000e-02
   4.9000000e-04
   7.9200000e-03
  -1.1000000e-04
  -7.7000000e-03
  -2.6600000e-03
  -2.3000000e-03
   1.7000000e-03
   2.2800000e-03
   2.8200000e-03
   1.8400000e-03
   1.0100000e-03
  -3.2100000e-03
   4.0300000e-03
   4.4100000e-03
  -2.5800000e-03
  -4.4400000e-03
  -3.4500000e-03
   5.8000000e-04
  -4.3000000e-03
  -6.4700000e-03
  -1.1200000e-03
   2.3900000e-03
  -1.5900000e-03
  -3.2600000e-03
  -2.2200000e-03
   5.6500000e-03
  -1.2230000e-02
  -2.6290000e-02
  -2.5750000e-02
  -2.4790000e-02
  -2.6540000e-02
  -7.2400000e-03
   1.0640000e-02
   4.4700000e-03
  -3.1800000e-03
  -4.9600000e-03
   8.4400000e-03
   8.8600000e-03
   3.8700000e-03
  -3.8900000e-03
   1.2100000e-03
  -4.1000000e-04
  -1.0670000e-02
  -3.2900000e-03
   2.0000000e-03
   4.7700000e-03
  -4.8300000e-03
  -4.1100000e-03
   6.2800000e-03
   8.9100000e-03
   3.0000000e-04
  -7.7900000e-03
  -3.7300000e-03
   6.9000000e-04
  -5.7600000e-03
   6.9000000e-04
   2.1900000e-03
   2.5000000e-04
  -5.1000000e-03
  -2.9900000e-03
   4.8800000e-03
   3.0400000e-03
   3.4500000e-03
  -2.6600000e-03
  -7.3500000e-03
  -1.9200000e-03
  -6.2500000e-03
  -4.8500000e-03
  -1.0700000e-03
  -7.1000000e-04
  -4.5500000e-03
  -1.0580000e-02
  -6.3900000e-03
  -3.6500000e-03
  -6.0300000e-03
  -1.5900000e-03
   7.1600000e-03
   7.7000000e-04
  -1.4720000e-02
  -9.7300000e-03
  -7.4000000e-04
   3.8400000e-03
   1.5600000e-03
  -4.8000000e-03
  -3.2100000e-03
  -3.2600000e-03
  -8.2300000e-03
  -5.7600000e-03
   2.5500000e-03
   3.1300000e-03
  -1.9200000e-03
  -3.2600000e-03
  -8.8000000e-04
  -7.0500000e-03
  -7.5900000e-03
  -9.2100000e-03
  -1.2600000e-03
   1.6500000e-03
  -2.3900000e-03
  -5.6800000e-03
  -6.5000000e-03
  -2.4400000e-03
  -3.2400000e-03
  -7.7900000e-03
   3.1300000e-03
   2.3300000e-03
  -3.6700000e-03
  -4.0900000e-03
  -4.1100000e-03
  -2.3900000e-03
  -6.2500000e-03
  -2.9100000e-03
   9.2100000e-03
   8.0100000e-03
  -1.5100000e-03
  -4.9600000e-03
  -7.7300000e-03
  -3.7000000e-03
  -1.5900000e-03
  -6.4200000e-03
  -3.6000000e-04
  -6.0000000e-04
   5.2000000e-04
  -5.8100000e-03
  -9.0000000e-04
   9.0000000e-04
  -5.0400000e-03
  -9.6000000e-04
  -3.6000000e-04
  -1.2300000e-03
  -5.5400000e-03
  -8.2500000e-03
  -1.3200000e-03
   5.4600000e-03
  -7.7000000e-04
  -1.0530000e-02
  -8.0900000e-03
   5.1800000e-03
   4.7700000e-03
   3.0000000e-05
   4.8000000e-03
  -2.7000000e-04
  -2.3000000e-03
  -2.5800000e-03
   4.0300000e-03
   8.9100000e-03
  -3.7600000e-03
  -6.9000000e-04
   4.6900000e-03
   7.2700000e-03
   1.8400000e-03
  -2.1100000e-03
   4.8300000e-03
  -5.8000000e-04
  -8.0100000e-03
  -7.5700000e-03
   2.9600000e-03
   1.5100000e-03
  -8.2000000e-03
  -8.4700000e-03
  -1.8900000e-03
   5.9800000e-03
   2.2500000e-03
   2.0000000e-03
   4.3000000e-03
   4.3000000e-03
   3.4000000e-03
   2.8000000e-03
   2.5000000e-03
   8.9700000e-03
   8.3600000e-03
   3.2100000e-03
  -1.9000000e-04
   2.5500000e-03
   1.8900000e-03
  -2.1100000e-03
   3.2900000e-03
   9.1900000e-03
   5.7900000e-03
  -6.0900000e-03
  -2.7400000e-03
   1.8400000e-03
   8.8000000e-04
  -1.3400000e-03
   2.2000000e-04
  -7.6500000e-03
  -9.1300000e-03
  -3.2100000e-03
   6.3300000e-03
  -6.1100000e-03
  -2.0970000e-02
  -2.2700000e-02
   7.8100000e-03
   1.3020000e-02
   3.7300000e-03
  -3.5100000e-03
  -2.4100000e-03
   2.6600000e-03
   3.0000000e-05
  -2.7400000e-03
   5.0400000e-03
  -4.0600000e-03
  -1.5630000e-02
  -1.7470000e-02
   9.0000000e-04
   5.0700000e-03
   1.1800000e-03
   9.1000000e-03
  -3.6200000e-03
  -1.7110000e-02
  -1.2690000e-02
   2.5200000e-03
   7.5100000e-03
   1.1540000e-02
   7.8100000e-03
   3.9200000e-03
   4.6300000e-03
   3.1800000e-03
   5.3200000e-03
   2.3900000e-03
   4.0600000e-03
   6.1400000e-03
   1.6200000e-03
   2.8200000e-03
   2.6900000e-03
   4.4700000e-03
  -3.1500000e-03
  -1.2300000e-03
   1.9700000e-03
  -2.3000000e-03
  -6.2200000e-03
  -8.9700000e-03
   1.2900000e-03
   4.7200000e-03
  -2.3000000e-03
  -4.4100000e-03
  -5.0000000e-05
   6.7400000e-03
   5.5400000e-03
   6.5000000e-03
   1.0940000e-02
  -4.7000000e-04
  -3.7000000e-03
   5.8000000e-04
   9.2900000e-03
   6.2200000e-03
  -1.4000000e-04
   1.0040000e-02
   1.0890000e-02
   7.2700000e-03
   6.4400000e-03
  -3.4800000e-03
   3.1800000e-03
   4.0300000e-03
   4.4400000e-03
   1.1000000e-04
  -6.3000000e-04
   6.2500000e-03
  -9.0000000e-04
  -3.5900000e-03
   6.2500000e-03
   9.1300000e-03
   1.0400000e-03
  -2.6300000e-03
   2.0300000e-03
   4.4400000e-03
   8.2000000e-04
   1.9000000e-04
   6.0900000e-03
   2.1700000e-03
  -3.3000000e-04
  -1.5600000e-03
   7.0200000e-03
   1.3710000e-02
   2.2500000e-03
   2.4400000e-03
   1.1570000e-02
   1.2910000e-02
   2.5000000e-03
  -1.0400000e-03
  -1.1800000e-03
  -2.4700000e-03
  -1.4000000e-03
   3.5100000e-03
   8.5000000e-04
   5.3500000e-03
  -6.7700000e-03
  -5.2100000e-03
   2.4400000e-03
   6.3000000e-04
  -2.9900000e-03
  -6.8300000e-03
  -1.2300000e-03
   3.4500000e-03
  -3.3500000e-03
  -4.4400000e-03
   2.2500000e-03
   1.6500000e-03
  -7.9000000e-03
  -4.7400000e-03
   7.7000000e-04
  -1.1200000e-03
  -4.5200000e-03
  -3.4000000e-03
   4.1100000e-03
   4.9900000e-03
   1.7300000e-03
  -7.7300000e-03
  -1.6700000e-03
   5.3200000e-03
   2.4100000e-03
   4.8000000e-03
   6.9600000e-03
   9.0800000e-03
   3.5400000e-03
   2.7700000e-03
   4.9900000e-03
   7.1000000e-04
  -8.8300000e-03
  -6.4700000e-03
   4.9000000e-04
   3.0400000e-03
  -2.5000000e-04
   4.5200000e-03
   8.2500000e-03
   6.1100000e-03
   5.9800000e-03
   5.7000000e-03
   4.1900000e-03
   7.6500000e-03
   5.5000000e-04
  -2.1900000e-03
   3.4000000e-03
   3.3200000e-03
  -3.5600000e-03
  -2.2200000e-03
   2.0300000e-03
   3.7600000e-03
  -5.0200000e-03
  -3.7000000e-03
   7.8100000e-03
   2.1100000e-03
  -2.5800000e-03
  -1.4500000e-03
  -3.3700000e-03
   2.2000000e-04
  -2.2500000e-03
   1.9200000e-03
   8.5800000e-03
  -3.8900000e-03
  -1.0090000e-02
  -4.4100000e-03
   7.4600000e-03
   7.0200000e-03
  -4.5500000e-03
  -5.9800000e-03
  -1.1200000e-03
  -1.5900000e-03
  -9.2100000e-03
  -4.5800000e-03
   6.3000000e-04
  -4.3300000e-03
  -3.2100000e-03
  -4.2800000e-03
  -1.2300000e-03
   1.8900000e-03
  -4.3900000e-03
   1.9000000e-04
   4.9100000e-03
   5.0000000e-05
  -8.5000000e-04
  -3.1800000e-03
   7.1300000e-03
   1.0400000e-03
  -4.9900000e-03
   1.8100000e-03
   5.9800000e-03
   6.2200000e-03
   1.4000000e-03
   6.3000000e-04
   8.0600000e-03
   4.7200000e-03
  -4.1700000e-03
  -1.8900000e-03
  -4.7000000e-04
  -4.9000000e-04
  -1.0100000e-03
   1.7000000e-03
   2.8500000e-03
   1.9000000e-04
  -5.7600000e-03
  -1.7800000e-03
   1.2100000e-03
   3.5600000e-03
  -3.1500000e-03
  -5.3500000e-03
   2.4400000e-03
  -3.3000000e-04
  -2.5000000e-04
  -3.2900000e-03
   2.6900000e-03
   5.4000000e-03
  -2.5800000e-03
   3.8100000e-03
   7.8400000e-03
  -1.9000000e-04
  -4.8800000e-03
  -4.7400000e-03
   4.1700000e-03
   6.3600000e-03
   2.3600000e-03
   2.5000000e-03
   5.7300000e-03
   7.0500000e-03
  -1.9200000e-03
   3.0000000e-04
   1.2900000e-03
   2.2000000e-04
  -8.6100000e-03
  -6.8000000e-03
   3.2900000e-03
  -1.9000000e-04
  -2.0300000e-03
   6.0000000e-04
   4.8000000e-03
   8.8000000e-04
  -1.2640000e-02
  -5.7600000e-03
   2.7400000e-03
  -3.0000000e-04
  -2.1900000e-03
  -4.4000000e-04
   6.2800000e-03
   4.0600000e-03
  -8.5000000e-04
  -2.2800000e-03
   2.0800000e-03
   2.2000000e-04
  -2.5200000e-03
  -3.5900000e-03
   4.9000000e-04
  -1.6000000e-04
  -9.4000000e-03
  -9.3000000e-04
   2.7400000e-03
  -2.6300000e-03
  -9.8700000e-03
  -4.1400000e-03
   4.1000000e-04
  -4.9600000e-03
  -7.9000000e-03
  -1.0230000e-02
   1.2100000e-03
  -6.6000000e-04
   1.4300000e-03
   4.7400000e-03
   3.2600000e-03
   2.7700000e-03
  -1.3110000e-02
  -5.6500000e-03
   1.3160000e-02
   6.0600000e-03
   2.7400000e-03
  -2.5800000e-03
   4.9400000e-03
   6.9900000e-03
  -1.1000000e-04
   7.9800000e-03
   1.0100000e-03
  -6.0000000e-04
  -4.9100000e-03
  -1.2100000e-03
  -2.4100000e-03
  -6.7200000e-03
  -1.7300000e-03
  -8.0600000e-03
  -3.1500000e-03
   3.2400000e-03
  -3.4000000e-03
  -3.8700000e-03
  -1.5900000e-03
   4.8000000e-03
  -4.6900000e-03
  -1.2170000e-02
   3.3000000e-04
   4.7700000e-03
  -3.6200000e-03
   1.6200000e-03
   6.5500000e-03
   7.1600000e-03
  -1.4300000e-03
   9.3000000e-04
   1.3200000e-03
  -5.4800000e-03
  -5.0400000e-03
  -4.8800000e-03
   3.2600000e-03
   6.3900000e-03
  -1.1000000e-03
  -6.6000000e-04
   7.7600000e-03
   2.4100000e-03
  -8.3100000e-03
  -1.2170000e-02
   3.2400000e-03
   5.8100000e-03
   8.2000000e-04
   5.1800000e-03
   1.6700000e-03
   6.9900000e-03
   4.4100000e-03
   6.0000000e-03
   8.6400000e-03
  -6.1100000e-03
  -4.5200000e-03
   4.4000000e-04
   1.0090000e-02
   1.4120000e-02
   1.1000000e-04
   2.6000000e-03
   8.7500000e-03
  -3.3000000e-04
   2.2000000e-04
  -3.3000000e-04
   9.0800000e-03
   9.9000000e-04
  -7.2700000e-03
   8.9400000e-03
   1.4860000e-02
   1.0890000e-02
  -3.6000000e-04
   2.0000000e-03
   7.6200000e-03
   1.2260000e-02
   1.0720000e-02
   6.6400000e-03
   9.9800000e-03
   8.3900000e-03
  -2.9100000e-03
   9.2400000e-03
   1.0640000e-02
   8.2300000e-03
  -1.8100000e-03
  -4.1700000e-03
   6.0600000e-03
   6.0000000e-04
  -7.7000000e-04
   7.9500000e-03
   3.2900000e-03
  -3.8000000e-04
  -2.1700000e-03
  -3.1800000e-03
  -1.3200000e-03
   1.0400000e-03
  -4.1700000e-03
  -2.3600000e-03
   8.5500000e-03
   8.9900000e-03
   7.1000000e-04
   1.1500000e-03
   6.0900000e-03
   5.2900000e-03
   2.0800000e-03
   8.5000000e-04
   8.6900000e-03
  -1.7800000e-03
  -5.8100000e-03
  -4.3300000e-03
  -3.2900000e-03
   1.6000000e-04
  -9.7300000e-03
  -8.5500000e-03
  -3.0000000e-05
  -7.8700000e-03
  -6.2200000e-03
  -2.6000000e-03
   8.8000000e-04
  -2.6000000e-03
  -1.0940000e-02
  -7.9000000e-03
  -6.5800000e-03
  -7.9500000e-03
  -1.2670000e-02
  -5.3700000e-03
   1.6200000e-03
  -1.3400000e-03
  -5.2600000e-03
  -4.1900000e-03
  -1.2900000e-03
  -5.2000000e-04
  -9.0000000e-04
  -3.4800000e-03
  -5.0400000e-03
  -1.0280000e-02
  -6.7200000e-03
  -8.3400000e-03
   9.0000000e-04
   4.7000000e-04
  -7.8700000e-03
  -1.9000000e-04
   2.0600000e-03
  -4.5500000e-03
  -5.3700000e-03
  -7.0500000e-03
  -2.1900000e-03
  -2.7100000e-03
  -5.7000000e-03
   9.0000000e-04
   5.5000000e-04
  -2.8200000e-03
  -9.8700000e-03
  -6.9900000e-03
   1.1800000e-03
  -1.5100000e-03
  -7.9200000e-03
  -4.6600000e-03
   8.0000000e-05
  -3.1800000e-03
  -9.0200000e-03
  -9.8700000e-03
  -6.7700000e-03
  -3.6200000e-03
  -1.2900000e-03
   6.9400000e-03
   6.1400000e-03
   3.0400000e-03
   2.0600000e-03
   1.3400000e-03
   3.3700000e-03
   2.5000000e-03
  -5.1800000e-03
  -4.9100000e-03
   2.8200000e-03
   6.5300000e-03
   3.5400000e-03
   1.4640000e-02
   9.3800000e-03
   4.3000000e-03
  -3.2100000e-03
   4.3000000e-03
   1.3300000e-02
   7.9000000e-03
   2.2200000e-03
  -3.5600000e-03
   2.5800000e-03
   1.0830000e-02
   6.8000000e-03
   6.6600000e-03
   5.1800000e-03
  -4.0900000e-03
  -8.4200000e-03
  -7.9800000e-03
   8.0600000e-03
   6.0900000e-03
   6.9600000e-03
   5.9200000e-03
   3.6700000e-03
  -1.2100000e-03
  -8.0900000e-03
  -3.1300000e-03
   3.0700000e-03
   0.0000000e+00
  -1.6500000e-03
   3.6700000e-03
   1.1160000e-02
   1.0890000e-02
  -1.2100000e-03
  -1.5660000e-02
  -1.8420000e-02
  -8.2000000e-03
  -5.4600000e-03
  -3.4500000e-03
   6.1100000e-03
   1.6200000e-03
   8.0000000e-05
   1.1950000e-02
   8.1400000e-03
   5.8000000e-04
  -4.6300000e-03
  -1.7300000e-03
   6.1400000e-03
   3.8400000e-03
  -4.8000000e-03
  -6.7200000e-03
   4.1000000e-04
   1.8900000e-03
  -5.0000000e-05
   1.8100000e-03
   8.8000000e-03
   1.4000000e-03
  -6.7200000e-03
  -1.8600000e-03
   2.7400000e-03
   3.7600000e-03
   3.5600000e-03
   6.2800000e-03
   2.5500000e-03
   5.5900000e-03
  -1.1500000e-03
  -2.9100000e-03
  -3.5600000e-03
  -4.0300000e-03
  -2.4400000e-03
   7.5900000e-03
   9.1000000e-03
   2.2200000e-03
  -6.9400000e-03
   6.0000000e-04
   7.9800000e-03
  -6.0000000e-03
  -1.4090000e-02
  -8.6100000e-03
   5.2000000e-04
  -2.7100000e-03
  -5.4300000e-03
   8.8300000e-03
   1.1520000e-02
   8.3400000e-03
  -1.6510000e-02
  -2.4480000e-02
  -2.3740000e-02
  -2.8460000e-02
  -7.1600000e-03
  -5.3200000e-03
   1.3700000e-03
  -1.3400000e-03
  -5.0400000e-03
   1.4300000e-03
   5.2100000e-03
   1.4500000e-03
  -5.4800000e-03
  -7.4000000e-04
   7.6800000e-03
  -2.5800000e-03
  -1.0170000e-02
  -5.5000000e-04
   2.5200000e-03
  -2.2800000e-03
  -8.9400000e-03
   1.6000000e-04
   4.5800000e-03
  -9.6000000e-04
   1.6500000e-03
  -7.7000000e-04
   5.4300000e-03
   8.0000000e-05
  -3.8100000e-03
  -1.7000000e-03
  -3.8000000e-04
  -5.7000000e-03
  -1.0360000e-02
   1.0100000e-03
   1.5100000e-03
  -1.3200000e-03
  -3.2900000e-03
   3.8000000e-04
   1.1200000e-03
  -3.7600000e-03
  -1.0690000e-02
  -6.2200000e-03
  -2.0300000e-03
   3.9500000e-03
   4.8800000e-03
   1.8600000e-03
   2.2500000e-03
  -5.2100000e-03
  -4.8300000e-03
   1.2600000e-03
   3.2600000e-03
  -3.6700000e-03
  -8.6400000e-03
   3.2400000e-03
   8.2000000e-03
  -1.4300000e-03
  -4.5000000e-03
  -4.7400000e-03
  -3.3000000e-04
  -5.2400000e-03
  -1.1190000e-02
  -7.1300000e-03
  -1.7500000e-03
  -2.7400000e-03
  -4.8800000e-03
  -8.1400000e-03
   1.2300000e-03
  -2.4700000e-03
  -5.6800000e-03
  -5.7000000e-03
  -4.8300000e-03
  -2.9100000e-03
  -6.4700000e-03
  -4.2800000e-03
   2.6000000e-03
  -2.2800000e-03
  -6.3100000e-03
  -5.5000000e-04
   0.0000000e+00
  -5.9200000e-03
  -7.4300000e-03
   2.2000000e-04
   1.1000000e-03
  -4.8500000e-03
  -8.0000000e-05
   3.1300000e-03
  -5.5000000e-04
  -1.5900000e-03
  -9.7300000e-03
  -1.0470000e-02
  -1.5600000e-03
  -5.7300000e-03
  -7.4600000e-03
  -3.5100000e-03
   1.3700000e-03
  -3.1000000e-03
  -2.4810000e-02
  -2.4730000e-02
  -1.6120000e-02
  -2.4370000e-02
  -1.2750000e-02
   1.9500000e-03
  -1.0100000e-03
  -8.0000000e-05
  -3.7800000e-03
  -1.6000000e-04
  -4.7000000e-04
  -3.1500000e-03
  -1.9600000e-02
  -2.0230000e-02
  -1.0560000e-02
  -2.6210000e-02
  -3.0410000e-02
  -2.6810000e-02
  -1.0560000e-02
  -1.2690000e-02
  -2.4810000e-02
  -1.5680000e-02
  -1.5710000e-02
  -1.0610000e-02
  -2.2200000e-03
  -1.1800000e-03
   5.7900000e-03
   5.8700000e-03
   1.8900000e-03
   3.9200000e-03
   2.5800000e-03
  -1.9500000e-03
  -3.1300000e-03
   1.9700000e-03
   7.5700000e-03
  -4.9000000e-04
  -3.1000000e-03
   4.5200000e-03
   1.4640000e-02
   9.4300000e-03
  -1.1000000e-04
   5.5400000e-03
   6.9100000e-03
   7.7000000e-04
  -2.7000000e-04
   1.1190000e-02
   1.1540000e-02
   4.2500000e-03
  -1.1500000e-03
   1.7500000e-03
   3.5400000e-03
   4.3600000e-03
  -6.5300000e-03
  -2.5500000e-03
   8.4400000e-03
   2.8200000e-03
   5.0000000e-05
  -3.9500000e-03
   9.0500000e-03
   3.6500000e-03
  -4.2800000e-03
   8.0000000e-04
  -8.0000000e-05
  -4.4000000e-04
   4.1100000e-03
   1.1020000e-02
   1.4640000e-02
   3.3000000e-04
  -2.2200000e-03
   1.1900000e-02
   7.6800000e-03
   3.1800000e-03
  -5.3200000e-03
  -2.6600000e-03
   4.7700000e-03
   2.8000000e-03
   5.2100000e-03
   1.6200000e-03
   2.7400000e-03
   2.1100000e-03
  -4.4100000e-03
  -1.6010000e-02
  -2.1470000e-02
  -1.9910000e-02
   2.6600000e-03
   8.1700000e-03
   6.3900000e-03
   5.6200000e-03
   7.7600000e-03
   1.1820000e-02
   7.5400000e-03
   7.8100000e-03
   5.7600000e-03
   4.4400000e-03
   5.6500000e-03
   3.2900000e-03
   7.2400000e-03
   4.5200000e-03
   5.8900000e-03
   2.9600000e-03
  -1.8900000e-03
   6.6400000e-03
   5.6200000e-03
  -8.2000000e-04
   1.7300000e-03
  -5.6800000e-03
  -1.6450000e-02
  -2.0890000e-02
  -2.3220000e-02
  -1.7880000e-02
  -1.6420000e-02
  -7.4000000e-04
   3.3000000e-04
   4.6100000e-03
   9.9300000e-03
   9.8700000e-03
   1.2090000e-02
   1.1600000e-02
   1.1050000e-02
   1.1050000e-02
   7.9000000e-03
   9.7900000e-03
   1.5770000e-02
   1.1160000e-02
   4.0000000e-03
   6.5000000e-03
   1.0420000e-02
   1.8900000e-03
  -2.5000000e-04
   9.3200000e-03
   8.9400000e-03
   3.7800000e-03
  -2.7000000e-04
   3.6700000e-03
   7.2700000e-03
   6.8000000e-03
   1.7500000e-03
  -9.6000000e-04
   3.3000000e-04
  -8.0000000e-04
   1.0700000e-03
   6.0900000e-03
   7.5100000e-03
   7.3500000e-03
   2.7700000e-03
   7.2700000e-03
   9.6000000e-03
   5.4300000e-03
   4.1400000e-03
   1.1500000e-03
   2.5000000e-04
   3.4000000e-03
   3.2900000e-03
   2.7700000e-03
   1.8100000e-03
  -1.6200000e-03
   2.9300000e-03
  -1.2600000e-03
   3.3000000e-04
  -5.6800000e-03
  -4.8300000e-03
   3.3200000e-03
   4.6300000e-03
   6.2500000e-03
   1.8600000e-03
   7.9000000e-03
   1.4800000e-03
  -1.1020000e-02
  -6.2500000e-03
  -4.7000000e-04
   9.0000000e-04
   1.6500000e-03
   4.1700000e-03
  -7.2700000e-03
  -1.8920000e-02
  -3.9200000e-03
  -3.2900000e-03
  -3.7300000e-03
   5.6200000e-03
   2.2200000e-03
   1.0700000e-03
   1.6700000e-03
   8.5000000e-04
  -1.6500000e-03
   2.3000000e-03
   4.1400000e-03
  -3.0000000e-04
  -6.8500000e-03
  -5.4600000e-03
  -1.3400000e-03
   1.7500000e-03
  -3.0000000e-04
  -1.3700000e-03
  -2.3900000e-03
  -1.3200000e-03
  -3.6700000e-03
  -3.1300000e-03
  -3.3700000e-03
   1.3400000e-03
   2.3300000e-03
  -1.4800000e-03
   5.2900000e-03
   1.3200000e-03
  -1.5600000e-03
  -4.1400000e-03
   4.1000000e-04
   4.3300000e-03
  -2.9300000e-03
  -2.2500000e-03
  -4.2800000e-03
  -7.0500000e-03
  -4.3000000e-03
  -4.2200000e-03
   2.6900000e-03
   1.0100000e-03
  -3.2400000e-03
  -2.2200000e-03
  -1.8900000e-03
   7.7000000e-04
   2.3600000e-03
  -1.9000000e-04
   1.6400000e-02
   6.0300000e-03
  -1.4800000e-03
  -8.7700000e-03
  -1.6200000e-03
   1.0040000e-02
  -2.5000000e-04
   1.5600000e-03
   3.0700000e-03
   3.7600000e-03
   5.2100000e-03
  -6.4400000e-03
  -1.9740000e-02
  -2.1630000e-02
  -2.3960000e-02
  -1.8290000e-02
  -1.5270000e-02
  -1.3410000e-02
  -3.7000000e-03
   3.3000000e-04
   9.9000000e-03
   7.9000000e-03
  -3.0400000e-03
  -3.5600000e-03
   9.3800000e-03
  -6.9400000e-03
  -2.0040000e-02
  -1.1240000e-02
  -1.1430000e-02
  -1.5440000e-02
  -2.4480000e-02
  -3.5400000e-03
   9.5100000e-03
   1.3820000e-02
   7.4000000e-03
   2.2800000e-03
   2.2500000e-03
   1.5900000e-03
   8.0100000e-03
  -1.7500000e-03
  -1.2900000e-03
  -9.0000000e-04
  -1.1430000e-02
  -2.9340000e-02
  -2.7030000e-02
  -1.3820000e-02
  -9.6800000e-03
  -8.6600000e-03
  -4.0900000e-03
  -4.9400000e-03
  -3.7800000e-03
  -5.1500000e-03
  -2.3000000e-03
  -4.1100000e-03
  -5.0000000e-05
   7.1000000e-03
   1.3700000e-03
  -1.7500000e-03
  -9.0500000e-03
  -9.8400000e-03
   8.8600000e-03
  -1.6000000e-04
  -5.4600000e-03
  -3.2900000e-03
  -5.7600000e-03
  -3.4000000e-03
  -1.9520000e-02
  -3.2110000e-02
  -2.7010000e-02
  -2.8730000e-02
  -3.2190000e-02
  -2.3880000e-02
  -2.0040000e-02
  -2.0670000e-02
  -1.5270000e-02
  -1.4390000e-02
  -7.7000000e-03
  -1.3080000e-02
  -1.1820000e-02
  -1.9250000e-02
  -9.7100000e-03
  -6.8000000e-03
   3.6500000e-03
   1.1320000e-02
   1.5350000e-02
   1.3160000e-02
   4.4100000e-03
  -5.0400000e-03
   7.0500000e-03
   1.1570000e-02
   8.5800000e-03
   2.7100000e-03
  -8.5000000e-04
   4.7200000e-03
   3.0200000e-03
   7.5700000e-03
   8.1400000e-03
   1.7000000e-03
  -5.8900000e-03
  -4.0600000e-03
   2.5000000e-04
   5.5900000e-03
   5.1300000e-03
  -3.0000000e-05
   3.9800000e-03
   6.4200000e-03
  -1.7300000e-03
  -7.7000000e-04
   6.9900000e-03
   2.1100000e-03
  -2.8800000e-03
  -3.8100000e-03
   6.6600000e-03
   5.8700000e-03
  -7.2700000e-03
  -1.6000000e-04
   7.5400000e-03
   9.7600000e-03
   2.4100000e-03
  -2.0800000e-03
  -7.1000000e-04
   3.6500000e-03
  -5.9800000e-03
  -1.8730000e-02
  -1.0890000e-02
  -1.0310000e-02
  -4.8300000e-03
   8.8000000e-04
   7.3200000e-03
  -7.4000000e-04
  -3.7800000e-03
  -3.8000000e-04
   1.7500000e-03
   6.6000000e-04
  -4.2200000e-03
  -1.9500000e-03
  -1.6500000e-03
   1.2300000e-03
   2.5200000e-03
   4.4700000e-03
   1.3490000e-02
   8.5500000e-03
  -5.1500000e-03
   1.7800000e-03
   1.1130000e-02
   1.1210000e-02
   2.6000000e-03
   2.1700000e-03
   4.3000000e-03
  -1.1000000e-04
   2.2200000e-03
   1.2610000e-02
   1.5350000e-02
   1.6150000e-02
   6.4200000e-03
   3.6500000e-03
   4.0900000e-03
   2.9600000e-03
  -2.2800000e-03
  -3.5400000e-03
   8.8000000e-03
   1.0720000e-02
   3.4000000e-03
   9.6200000e-03
   1.2670000e-02
   9.1900000e-03
   6.0900000e-03
   3.2600000e-03
   4.9100000e-03
   4.1900000e-03
  -4.8500000e-03
  -6.5000000e-03
   5.8400000e-03
   6.5000000e-03
   1.9500000e-03
  -4.0600000e-03
  -2.7700000e-03
   3.1000000e-03
  -1.7500000e-03
   2.9900000e-03
   4.9600000e-03
   4.0300000e-03
  -4.0000000e-03
  -4.0900000e-03
   4.3900000e-03
  -2.1700000e-03
  -8.3400000e-03
  -6.9600000e-03
  -8.0000000e-05
   4.4100000e-03
   2.4100000e-03
   8.5000000e-04
   5.1800000e-03
   1.0560000e-02
   2.7400000e-03
   3.2600000e-03
  -8.0000000e-05
   2.5500000e-03
   1.4000000e-03
   5.2000000e-04
   1.2040000e-02
   7.7000000e-03
   7.0200000e-03
   6.1700000e-03
   8.7200000e-03
   2.0300000e-03
  -4.5200000e-03
  -2.7000000e-04
   2.7100000e-03
  -3.1800000e-03
  -6.9100000e-03
  -4.3900000e-03
  -7.2100000e-03
  -1.3700000e-03
  -7.5100000e-03
  -8.2800000e-03
  -3.1500000e-03
  -6.2000000e-03
  -1.0310000e-02
  -6.8800000e-03
  -1.8100000e-03
  -7.7900000e-03
  -1.0420000e-02
  -6.3900000e-03
  -9.3000000e-04
  -8.6100000e-03
  -3.0050000e-02
  -3.0430000e-02
  -2.0070000e-02
  -1.9270000e-02
  -1.5770000e-02
   5.7600000e-03
   1.1350000e-02
   7.7300000e-03
   2.5200000e-03
   8.0000000e-05
   1.4390000e-02
   1.1240000e-02
   2.6000000e-03
   3.7300000e-03
   1.1350000e-02
   1.1630000e-02
   4.2500000e-03
   4.5800000e-03
   1.2800000e-02
   4.1100000e-03
  -3.1000000e-03
  -5.6500000e-03
  -3.2400000e-03
  -6.8800000e-03
  -1.2090000e-02
  -6.9400000e-03
   3.6200000e-03
   5.2600000e-03
  -6.3000000e-04
  -5.1300000e-03
  -1.3700000e-03
   6.0000000e-04
   1.3700000e-03
   5.2600000e-03
   3.7600000e-03
   2.1900000e-03
   8.0000000e-05
   5.5700000e-03
   7.7900000e-03
   5.5400000e-03
  -4.2200000e-03
  -4.8500000e-03
   7.0200000e-03
   7.4900000e-03
   1.5900000e-03
   3.3000000e-04
   3.5400000e-03
   3.6700000e-03
   8.0000000e-04
   1.1930000e-02
   5.2900000e-03
  -2.7700000e-03
  -6.3100000e-03
  -8.4700000e-03
   3.9800000e-03
   8.5000000e-04
  -2.5000000e-03
  -4.4000000e-04
   1.1500000e-03
   6.6100000e-03
  -1.3200000e-03
   4.2500000e-03
   1.1730000e-02
   7.9200000e-03
   9.7100000e-03
   6.2000000e-03
   3.9800000e-03
   2.8000000e-03
  -6.2800000e-03
   2.7100000e-03
   5.8900000e-03
   7.7000000e-04
  -3.2600000e-03
  -2.3600000e-03
   1.8900000e-03
   3.8900000e-03
  -2.4700000e-03
  -2.9600000e-03
  -2.2800000e-03
   2.3600000e-03
  -4.4100000e-03
  -4.8800000e-03
   6.1100000e-03
  -3.0000000e-04
   1.2830000e-02
   8.5000000e-03
   6.0000000e-04
   4.2500000e-03
  -5.8700000e-03
  -2.2500000e-03
  -4.5200000e-03
  -7.6500000e-03
  -7.1000000e-03
  -1.4000000e-03
   3.5400000e-03
  -1.1500000e-03
  -5.2900000e-03
  -6.3300000e-03
  -1.1490000e-02
  -7.0500000e-03
  -1.2100000e-03
  -4.1700000e-03
  -8.5000000e-04
  -2.3770000e-02
  -2.9280000e-02
  -1.9250000e-02
  -9.7300000e-03
  -1.6010000e-02
  -4.5000000e-03
   9.9000000e-04
   1.7800000e-03
   2.8800000e-03
  -1.5100000e-03
  -2.5000000e-04
   1.0340000e-02
  -6.9000000e-04
  -5.4000000e-03
  -4.9900000e-03
   2.4100000e-03
  -6.9000000e-04
  -1.3760000e-02
  -1.0580000e-02
  -5.1000000e-03
  -7.3200000e-03
  -1.0690000e-02
  -1.2480000e-02
  -2.4100000e-03
  -1.1840000e-02
  -2.7090000e-02
  -1.5410000e-02
  -1.0470000e-02
  -2.0370000e-02
  -2.4270000e-02
  -2.3200000e-02
   6.1700000e-03
   1.0970000e-02
  -1.8900000e-03
   2.9100000e-03
   4.9100000e-03
   9.4600000e-03
   4.9900000e-03
   5.7600000e-03
   8.5300000e-03
   7.7300000e-03
   6.0900000e-03
   7.6800000e-03
   1.2230000e-02
   5.7600000e-03
  -3.8900000e-03
  -1.5900000e-03
   1.0090000e-02
   3.4000000e-03
  -4.4100000e-03
  -1.2100000e-03
   9.3000000e-04
   8.9100000e-03
   5.5700000e-03
   1.5400000e-03
   5.1300000e-03
  -1.6500000e-03
  -2.1900000e-03
   5.8000000e-04
   5.8900000e-03
   2.9300000e-03
  -6.8300000e-03
  -3.0000000e-04
   2.7100000e-03
   5.3500000e-03
   1.1200000e-03
   3.2100000e-03
   5.9800000e-03
   4.8300000e-03
   6.8500000e-03
   4.8300000e-03
   3.5400000e-03
  -5.2000000e-04
   3.3000000e-04
   2.4700000e-03
   8.7200000e-03
   2.2800000e-03
  -1.9200000e-03
   4.7000000e-04
   3.0200000e-03
  -2.3900000e-03
  -6.1100000e-03
  -1.1200000e-03
  -2.0000000e-03
  -6.0300000e-03
  -7.1800000e-03
  -5.1000000e-03
   6.1100000e-03
   3.3200000e-03
  -5.1300000e-03
  -4.4100000e-03
  -3.0400000e-03
   3.0000000e-04
  -5.2100000e-03
  -3.2600000e-03
  -4.3300000e-03
   3.0000000e-05
  -3.0000000e-04
   9.3000000e-04
  -1.1350000e-02
  -2.1360000e-02
  -3.2330000e-02
  -2.6130000e-02
  -9.0200000e-03
  -1.3430000e-02
  -1.8860000e-02
  -1.3130000e-02
  -9.9300000e-03
  -1.1190000e-02
  -4.5800000e-03
   3.1000000e-03
   4.5000000e-03
   1.9000000e-04
   1.7500000e-03
   6.7400000e-03
   5.3500000e-03
   2.1900000e-03
  -5.9800000e-03
  -5.2000000e-04
   2.0510000e-02
   1.5130000e-02
   1.0170000e-02
   1.1820000e-02
   1.0140000e-02
   1.1240000e-02
   1.7300000e-03
   5.5900000e-03
   1.0640000e-02
   1.9700000e-03
  -4.4000000e-04
   1.0610000e-02
   9.6800000e-03
   1.0800000e-02
   3.5600000e-03
   3.6700000e-03
   1.1800000e-03
  -4.9000000e-04
  -4.8500000e-03
  -1.1000000e-03
   9.2900000e-03
  -4.4100000e-03
  -9.2100000e-03
   5.2000000e-04
   1.9500000e-03
   4.3900000e-03
  -2.8000000e-03
   5.5000000e-04
   3.2600000e-03
  -4.8800000e-03
   1.4000000e-03
  -4.4000000e-04
   2.7000000e-04
   1.8600000e-03
  -5.2600000e-03
   1.7000000e-03
   3.5600000e-03
   5.3500000e-03
  -2.2800000e-03
  -2.7100000e-03
   8.3100000e-03
   5.2100000e-03
  -3.6200000e-03
  -4.4100000e-03
  -3.8700000e-03
  -3.7800000e-03
  -4.6600000e-03
  -1.8400000e-03
  -4.5800000e-03
  -3.4300000e-03
  -4.2500000e-03
   2.7000000e-04
   3.2900000e-03
  -5.7600000e-03
  -5.4300000e-03
   6.9400000e-03
   4.9900000e-03
   1.7800000e-03
  -5.8900000e-03
  -3.3200000e-03
  -4.4700000e-03
  -2.5170000e-02
  -2.5770000e-02
  -2.7530000e-02
  -2.0540000e-02
  -2.4870000e-02
  -9.3200000e-03
   6.2800000e-03
   2.7100000e-03
  -1.0170000e-02
  -1.4530000e-02
  -6.2800000e-03
  -1.2100000e-03
  -3.2600000e-03
  -7.8700000e-03
   8.8000000e-04
   7.4000000e-03
  -4.7000000e-04
  -5.0200000e-03
   7.1000000e-04
   4.7200000e-03
  -1.2690000e-02
  -2.4650000e-02
  -2.3310000e-02
  -1.9600000e-02
  -2.1410000e-02
  -1.9520000e-02
  -9.0500000e-03
  -8.5000000e-03
  -1.2690000e-02
  -2.9100000e-03
   5.5000000e-04
   6.6100000e-03
   6.9000000e-04
  -3.7800000e-03
   8.5000000e-03
   1.2560000e-02
   3.5600000e-03
  -3.4300000e-03
   3.2600000e-03
   7.9200000e-03
   4.9100000e-03
   9.9000000e-04
   7.8700000e-03
   1.0090000e-02
  -4.4700000e-03
   1.1500000e-03
   1.5900000e-03
   8.7700000e-03
   8.3100000e-03
  -2.5000000e-04
   1.5100000e-03
   3.7800000e-03
   4.6600000e-03
   4.3900000e-03
   5.0700000e-03
   1.2260000e-02
   9.0800000e-03
   4.1000000e-04
   5.5100000e-03
   8.1700000e-03
   4.4700000e-03
   1.4000000e-04
   6.2200000e-03
   1.0090000e-02
  -5.5400000e-03
  -9.5400000e-03
   3.4500000e-03
   1.2100000e-03
  -9.3000000e-04
  -8.0000000e-05
   3.9200000e-03
   1.0060000e-02
   1.3400000e-03
  -5.0200000e-03
  -4.5500000e-03
  -2.0600000e-03
  -3.7800000e-03
  -1.3700000e-03
   3.8700000e-03
   1.6500000e-03
  -6.5800000e-03
  -6.5800000e-03
  -3.0200000e-03
   7.4000000e-04
  -2.5500000e-03
   3.0200000e-03
   5.1800000e-03
   2.0300000e-03
   6.9000000e-04
  -9.3000000e-04
   6.5800000e-03
   8.2300000e-03
  -3.1800000e-03
  -5.4300000e-03
  -3.2900000e-03
   6.5300000e-03
   3.6500000e-03
  -2.0000000e-03
  -1.8600000e-03
   5.5000000e-04
  -7.4000000e-04
  -5.8100000e-03
   6.3000000e-04
   3.5600000e-03
  -1.2300000e-03
  -6.2000000e-03
  -8.4700000e-03
  -4.1400000e-03
  -1.4070000e-02
  -1.2560000e-02
  -5.3200000e-03
  -8.7500000e-03
  -9.4300000e-03
  -1.5050000e-02
  -8.7200000e-03
  -2.5200000e-03
  -9.4000000e-03
  -7.5400000e-03
  -9.8700000e-03
  -7.2100000e-03
  -6.2500000e-03
  -1.1630000e-02
   2.8200000e-03
   6.1700000e-03
   2.0300000e-03
  -2.0590000e-02
  -1.4420000e-02
  -4.9000000e-04
  -9.6000000e-04
   3.0400000e-03
   4.0000000e-03
  -2.7000000e-04
  -8.2500000e-03
  -1.0450000e-02
  -2.4400000e-03
  -1.7000000e-03
  -2.3940000e-02
  -2.3500000e-02
  -1.5440000e-02
   4.8500000e-03
  -1.8900000e-03
  -4.5800000e-03
  -1.4000000e-03
   7.4000000e-04
  -1.0010000e-02
  -1.2970000e-02
  -1.6200000e-03
   5.6800000e-03
   3.6500000e-03
  -5.7900000e-03
   3.3700000e-03
  -1.9000000e-04
  -8.6600000e-03
  -4.7000000e-04
   1.8400000e-03
   9.7300000e-03
   5.1000000e-03
  -4.2200000e-03
  -4.8000000e-03
  -4.5000000e-03
  -1.2100000e-03
  -4.8800000e-03
  -2.4400000e-03
  -2.8800000e-03
  -8.8600000e-03
  -1.0640000e-02
   3.0200000e-03
   7.0700000e-03
  -1.0140000e-02
  -8.2500000e-03
  -3.9500000e-03
  -4.9600000e-03
  -1.3760000e-02
  -1.3540000e-02
  -7.4000000e-03
  -4.5500000e-03
  -8.8000000e-04
  -1.1430000e-02
  -6.3300000e-03
  -2.9900000e-03
  -1.9710000e-02
  -2.2020000e-02
  -2.3610000e-02
  -1.9990000e-02
  -2.8460000e-02
  -3.3480000e-02
  -1.9380000e-02
  -1.4830000e-02
  -3.3000000e-04
   3.7600000e-03
   1.1500000e-03
   8.7700000e-03
  -2.1900000e-03
   1.2300000e-03
   4.5000000e-03
   1.1240000e-02
   7.5700000e-03
  -3.0400000e-03
   8.8000000e-04
  -5.0000000e-05
   3.5400000e-03
   2.2500000e-03
   3.9800000e-03
   1.5900000e-03
   2.1100000e-03
   6.7400000e-03
   1.2830000e-02
   3.5400000e-03
  -5.0700000e-03
  -9.9800000e-03
  -2.2430000e-02
  -1.8970000e-02
  -4.9400000e-03
  -4.3600000e-03
   2.0800000e-03
   1.1490000e-02
   8.7200000e-03
   4.2500000e-03
   1.8400000e-03
   5.0200000e-03
  -7.5700000e-03
  -5.1500000e-03
   5.2900000e-03
   1.1680000e-02
   5.4000000e-03
   1.4000000e-03
   1.0250000e-02
   1.0610000e-02
   5.9800000e-03
   3.6500000e-03
   8.5500000e-03
   8.3900000e-03
   6.7200000e-03
   3.7000000e-03
   7.3500000e-03
   5.2400000e-03
  -2.6300000e-03
  -8.8000000e-04
  -4.7000000e-04
   4.9600000e-03
  -8.8000000e-04
  -3.5900000e-03
  -1.5000000e-02
  -1.2010000e-02
  -1.7990000e-02
  -4.8300000e-03
   5.7900000e-03
   6.1700000e-03
   1.4800000e-03
  -6.7700000e-03
  -1.6200000e-03
   2.4100000e-03
   4.0300000e-03
   2.9300000e-03
  -1.9700000e-03
  -1.4450000e-02
  -1.7490000e-02
  -3.8000000e-04
   8.2300000e-03
  -5.0000000e-05
  -3.9200000e-03
  -1.4500000e-03
   8.9100000e-03
   1.0780000e-02
   2.1100000e-03
  -2.8200000e-03
  -3.1300000e-03
   5.5100000e-03
   2.1100000e-03
  -1.7800000e-03
   4.7400000e-03
   4.8300000e-03
  -4.9000000e-04
   1.7800000e-03
   3.5400000e-03
   2.8800000e-03
  -7.9800000e-03
  -3.7800000e-03
  -5.2000000e-04
  -5.3200000e-03
  -1.7800000e-03
  -4.6600000e-03
  -5.8000000e-04
  -1.7500000e-03
  -1.8400000e-03
  -1.9000000e-04
  -7.6200000e-03
  -8.2800000e-03
  -4.0000000e-03
  -6.0300000e-03
  -1.7800000e-03
   2.5500000e-03
  -4.4000000e-04
   4.5800000e-03
   8.3600000e-03
   4.0000000e-03
  -5.8000000e-04
  -1.4500000e-03
   6.4700000e-03
   3.9500000e-03
  -5.0400000e-03
   2.2800000e-03
  -3.6500000e-03
  -1.8040000e-02
  -1.4310000e-02
  -2.1060000e-02
  -6.6100000e-03
   6.2500000e-03
   4.5200000e-03
  -2.4100000e-03
  -3.9800000e-03
   8.1200000e-03
   5.1000000e-03
   1.7800000e-03
   5.2900000e-03
   4.4400000e-03
  -3.6000000e-04
   1.2900000e-03
   4.3600000e-03
   3.6700000e-03
   4.9600000e-03
   1.1190000e-02
   1.4230000e-02
   6.8500000e-03
   3.0700000e-03
   4.9100000e-03
   6.7400000e-03
   9.0200000e-03
   6.0000000e-03
  -1.1200000e-03
  -1.6000000e-04
   5.2400000e-03
   8.2300000e-03
   7.9500000e-03
   1.4970000e-02
   1.1900000e-02
  -6.9000000e-04
  -1.0100000e-03
   4.9100000e-03
   3.2900000e-03
   3.9500000e-03
   1.4000000e-03
   5.9500000e-03
   4.5500000e-03
   7.0500000e-03
   8.8000000e-04
  -4.5800000e-03
   3.0400000e-03
   1.0100000e-03
  -2.0000000e-03
   1.0700000e-03
   2.7700000e-03
   3.4500000e-03
   3.1000000e-03
   9.9500000e-03
   2.7700000e-03
  -8.1200000e-03
   3.0000000e-04
   6.4200000e-03
   6.6600000e-03
   2.0000000e-03
   1.1500000e-03
   9.2400000e-03
   3.3500000e-03
  -2.6000000e-03
  -8.2800000e-03
   2.2500000e-03
   9.2700000e-03
   2.3900000e-03
  -3.5900000e-03
  -3.3200000e-03
   1.4300000e-03
  -3.4500000e-03
  -3.5100000e-03
   4.5000000e-03
   3.9200000e-03
  -3.6700000e-03
  -2.6300000e-03
   3.6000000e-04
  -2.1400000e-03
  -2.9300000e-03
  -1.3700000e-03
   3.5100000e-03
   4.2800000e-03
  -5.0000000e-05
   2.8200000e-03
   7.1600000e-03
   1.0230000e-02
   5.8700000e-03
  -3.2900000e-03
   4.2800000e-03
   3.8000000e-04
  -6.0600000e-03
  -1.6000000e-04
   4.1100000e-03
   3.5600000e-03
  -5.6200000e-03
  -5.0400000e-03
   3.3000000e-04
   1.2900000e-03
  -2.1400000e-03
  -3.6200000e-03
   4.0600000e-03
   5.5400000e-03
  -4.0300000e-03
  -1.1130000e-02
  -9.9800000e-03
  -9.5400000e-03
  -1.1350000e-02
  -6.4200000e-03
  -3.4000000e-03
  -2.9100000e-03
  -6.9000000e-04
  -1.0700000e-03
  -2.5800000e-03
  -4.5200000e-03
  -1.4860000e-02
  -7.5700000e-03
   8.8600000e-03
  -1.8450000e-02
  -3.4900000e-02
  -3.6470000e-02
  -1.1760000e-02
   1.2910000e-02
   3.4500000e-03
  -2.3600000e-03
   1.9500000e-03
  -1.9200000e-03
  -3.0400000e-03
  -2.0300000e-03
   4.6100000e-03
   4.1900000e-03
  -4.5800000e-03
  -1.1000000e-03
   5.0000000e-05
  -4.0000000e-03
  -1.2260000e-02
  -1.3380000e-02
  -2.3300000e-03
  -7.7000000e-04
  -4.6300000e-03
  -8.8000000e-03
  -9.0000000e-04
   4.1000000e-04
  -4.8800000e-03
  -4.2200000e-03
  -3.1000000e-03
  -6.0600000e-03
  -6.9400000e-03
  -2.7400000e-03
   4.1000000e-04
  -3.9500000e-03
  -1.8400000e-03
  -1.0700000e-03
  -1.2600000e-03
  -1.5570000e-02
  -2.9720000e-02
  -3.0600000e-02
  -2.2590000e-02
  -1.4610000e-02
  -4.1000000e-04
   1.4800000e-03
   1.4310000e-02
   1.1570000e-02
   5.3200000e-03
   2.0600000e-03
   3.7600000e-03
  -6.0000000e-04
  -3.6000000e-04
   9.7900000e-03
   8.9900000e-03
   5.9500000e-03
  -1.1000000e-03
  -4.1700000e-03
   1.5100000e-03
  -7.2400000e-03
  -8.8300000e-03
   2.5000000e-04
   2.2200000e-03
   4.2200000e-03
  -4.5800000e-03
  -6.0600000e-03
   3.9500000e-03
  -4.7000000e-04
   4.9000000e-04
  -4.7200000e-03
   1.2100000e-03
  -3.9800000e-03
  -1.2690000e-02
   3.0000000e-04
  -1.6700000e-03
   1.8600000e-03
   0.0000000e+00
  -4.8500000e-03
   1.6500000e-03
  -4.1400000e-03
  -6.5000000e-03
  -3.4000000e-03
   2.5200000e-03
   5.0700000e-03
  -3.7600000e-03
  -5.7000000e-03
   6.8800000e-03
   1.1000000e-03
  -1.5600000e-03
  -2.7700000e-03
  -2.4700000e-03
  -1.1800000e-03
  -5.2100000e-03
   4.9100000e-03
   7.5900000e-03
   1.2600000e-03
  -6.8300000e-03
  -7.2700000e-03
   9.6000000e-04
  -1.2300000e-03
  -4.3300000e-03
   4.4000000e-04
   2.8000000e-03
   2.5000000e-04
  -1.4500000e-03
  -3.2400000e-03
   4.1400000e-03
   5.2000000e-04
  -6.9400000e-03
  -7.7600000e-03
  -8.2800000e-03
  -4.1700000e-03
  -7.1300000e-03
  -1.3200000e-03
   4.9400000e-03
   2.8200000e-03
  -8.3600000e-03
  -1.4530000e-02
  -3.4800000e-03
  -4.1700000e-03
  -1.3490000e-02
  -1.0640000e-02
  -5.2600000e-03
  -1.8900000e-03
  -3.0200000e-03
  -3.3000000e-04
  -1.6700000e-03
  -2.6900000e-03
  -1.9770000e-02
  -3.0300000e-02
  -2.0890000e-02
  -2.4400000e-02
  -1.6620000e-02
  -1.6780000e-02
   4.9100000e-03
   1.3700000e-03
  -7.1300000e-03
  -2.2800000e-03
   6.6400000e-03
   9.5100000e-03
  -1.2300000e-03
  -4.3300000e-03
   5.5100000e-03
   9.9000000e-03
   7.2100000e-03
   1.4000000e-03
  -1.9700000e-03
  -8.6100000e-03
  -6.7400000e-03
   3.7300000e-03
   7.7300000e-03
   3.4000000e-03
   1.0700000e-03
   8.5000000e-04
   2.0000000e-03
   6.3600000e-03
  -6.3000000e-04
  -4.1700000e-03
   1.7300000e-03
   4.4400000e-03
  -4.0000000e-03
  -7.5400000e-03
   5.4800000e-03
   3.4000000e-03
   1.7500000e-03
   3.3500000e-03
   4.2800000e-03
   9.0000000e-04
  -3.3200000e-03
  -3.0000000e-05
   7.7900000e-03
   3.7600000e-03
  -1.1200000e-03
   4.9000000e-04
   4.4400000e-03
   1.6200000e-03
  -1.1500000e-03
  -2.3300000e-03
  -3.6200000e-03
  -1.7330000e-02
  -2.4430000e-02
  -1.7360000e-02
  -1.3110000e-02
   5.4800000e-03
   4.0600000e-03
   2.1400000e-03
  -6.0000000e-04
  -5.8100000e-03
  -5.1300000e-03
  -1.0700000e-03
   6.0900000e-03
   3.7600000e-03
  -2.2200000e-03
   2.4700000e-03
   6.3300000e-03
   6.8800000e-03
  -3.5600000e-03
  -6.9600000e-03
   6.0600000e-03
   3.6700000e-03
  -2.6000000e-03
   2.6900000e-03
   5.2400000e-03
   5.5000000e-04
  -4.9900000e-03
  -2.9100000e-03
   2.8800000e-03
  -5.2000000e-04
  -4.0000000e-03
   3.4300000e-03
   5.5400000e-03
   5.4600000e-03
   3.2600000e-03
  -1.0700000e-03
  -2.8500000e-03
  -4.4700000e-03
  -3.2100000e-03
  -3.0000000e-04
   3.9500000e-03
  -3.0400000e-03
  -6.0600000e-03
   9.9000000e-04
   1.0500000e-02
  -1.3400000e-03
  -6.2000000e-03
  -3.2400000e-03
   1.4800000e-03
  -3.3000000e-04
  -6.6100000e-03
   3.4000000e-03
   8.4700000e-03
   2.8500000e-03
  -3.8100000e-03
  -3.7000000e-03
   1.0700000e-03
   1.4500000e-03
  -6.0000000e-04
  -2.1100000e-03
   6.0000000e-04
   2.1400000e-03
   3.8000000e-04
  -1.8400000e-03
   3.0200000e-03
  -1.7000000e-03
  -4.0000000e-03
  -2.2200000e-03
   8.2800000e-03
   4.0900000e-03
  -2.2200000e-03
  -4.4000000e-04
   2.1900000e-03
  -2.7700000e-03
  -4.6900000e-03
  -3.5900000e-03
  -6.2200000e-03
  -2.7700000e-03
  -8.5000000e-03
  -4.2200000e-03
  -1.0400000e-03
  -2.0600000e-03
  -4.7200000e-03
  -5.3500000e-03
  -2.4100000e-03
  -1.1460000e-02
  -1.2060000e-02
  -6.9400000e-03
   3.2100000e-03
   4.9000000e-04
  -5.7300000e-03
  -1.9500000e-03
   1.6200000e-03
  -1.9700000e-03
  -5.8000000e-04
   5.1000000e-03
   6.4200000e-03
   6.0000000e-03
   2.2000000e-04
  -2.1400000e-03
  -2.5500000e-03
  -2.4400000e-03
  -6.3300000e-03
  -4.9600000e-03
  -4.4100000e-03
  -9.6800000e-03
  -9.3500000e-03
  -8.9400000e-03
   2.6900000e-03
   8.0000000e-04
  -2.8500000e-03
   9.9000000e-04
   1.8900000e-03
  -2.3900000e-03
  -4.8500000e-03
  -4.0600000e-03
   4.2500000e-03
   7.9800000e-03
  -1.3400000e-03
   4.4400000e-03
   1.8600000e-03
  -1.1680000e-02
  -1.3130000e-02
  -6.2800000e-03
   3.7800000e-03
  -2.5500000e-03
  -1.7800000e-03
   3.1500000e-03
   7.6800000e-03
   5.7000000e-03
   2.5500000e-03
   1.3400000e-03
   4.6900000e-03
  -3.2100000e-03
  -2.4400000e-03
   5.2900000e-03
   5.3700000e-03
   6.3900000e-03
   1.0400000e-03
   3.4000000e-03
   2.2000000e-04
  -3.8400000e-03
  -7.8100000e-03
  -5.5100000e-03
  -4.7000000e-04
  -3.1000000e-03
  -2.8500000e-03
  -5.7600000e-03
   2.7400000e-03
  -5.2600000e-03
  -1.0500000e-02
  -3.0700000e-03
  -8.0000000e-05
   1.1200000e-03
  -4.9100000e-03
  -4.0600000e-03
   2.2200000e-03
   8.0000000e-05
  -3.6500000e-03
  -8.0000000e-04
   4.5500000e-03
   4.2800000e-03
   4.9000000e-04
   5.7900000e-03
   1.1160000e-02
   7.7000000e-04
   9.7600000e-03
   1.3960000e-02
   1.9520000e-02
   1.2530000e-02
   4.8300000e-03
   3.3000000e-04
  -1.4000000e-03
  -6.0000000e-04
   1.2900000e-03
   2.0300000e-03
   3.5400000e-03
  -1.4500000e-03
  -4.2800000e-03
   6.9000000e-04
   4.3600000e-03
   5.5100000e-03
  -3.7600000e-03
   2.8000000e-03
   7.8100000e-03
  -3.3000000e-04
  -5.5000000e-04
   4.7000000e-04
   1.7500000e-03
   6.5500000e-03
   4.7200000e-03
   2.0150000e-02
   1.2170000e-02
   3.1800000e-03
   2.3300000e-03
   2.1700000e-03
   4.1100000e-03
  -5.5700000e-03
  -9.1000000e-03
  -2.3000000e-03
   2.6000000e-03
   2.8000000e-03
  -3.8900000e-03
  -3.6500000e-03
  -4.6300000e-03
  -4.5200000e-03
  -4.0600000e-03
  -6.4400000e-03
  -6.0900000e-03
  -6.3600000e-03
  -5.8900000e-03
  -5.0000000e-05
  -3.1000000e-03
  -6.5500000e-03
  -1.2200000e-02
  -8.0300000e-03
   1.5100000e-03
  -3.9500000e-03
  -8.1200000e-03
  -3.0400000e-03
  -2.5200000e-03
  -2.9300000e-03
  -7.0200000e-03
   2.9600000e-03
   6.3600000e-03
  -7.2900000e-03
  -7.7600000e-03
  -9.0500000e-03
   1.7300000e-03
   2.8800000e-03
  -7.1600000e-03
  -6.6000000e-04
  -2.3600000e-03
  -8.5300000e-03
  -9.5100000e-03
   2.2800000e-03
  -2.1700000e-03
  -2.4840000e-02
  -2.9280000e-02
  -7.7000000e-03
   1.8100000e-03
  -1.0060000e-02
  -1.4970000e-02
  -4.0000000e-03
   5.3700000e-03
   5.1000000e-03
   2.7400000e-03
   2.3600000e-03
   5.5400000e-03
   4.7400000e-03
   3.8900000e-03
   4.6300000e-03
   7.4300000e-03
   5.2100000e-03
   9.0000000e-04
   4.5500000e-03
   6.0600000e-03
   1.4300000e-03
  -4.8800000e-03
   1.7500000e-03
   6.9900000e-03
  -1.9700000e-03
  -6.0600000e-03
   4.1700000e-03
   9.1600000e-03
   2.6900000e-03
  -3.3200000e-03
   1.3200000e-03
   2.3300000e-03
   2.7000000e-04
   6.8800000e-03
   4.0000000e-03
   5.2100000e-03
  -4.7000000e-04
  -2.9100000e-03
   5.4600000e-03
   2.8800000e-03
   2.5500000e-03
   1.4010000e-02
   1.0230000e-02
   1.0170000e-02
   4.1900000e-03
  -6.1100000e-03
  -4.6900000e-03
   7.7000000e-04
   8.1400000e-03
   3.6700000e-03
   2.4100000e-03
   1.7500000e-03
  -3.7600000e-03
   4.5000000e-03
   7.4900000e-03
   1.3330000e-02
   7.7300000e-03
   1.3200000e-03
   1.2230000e-02
   2.2800000e-03
  -8.4400000e-03
  -1.1840000e-02
  -4.1100000e-03
   6.1700000e-03
   1.3700000e-03
   5.4300000e-03
   5.3500000e-03
   6.9900000e-03
   3.2600000e-03
  -6.0300000e-03
  -2.3600000e-03
   5.1000000e-03
  -2.0600000e-03
  -6.4200000e-03
  -4.2500000e-03
  -3.1500000e-03
   5.8000000e-04
  -1.4000000e-03
   6.1100000e-03
  -4.9000000e-04
  -8.0900000e-03
  -8.5800000e-03
  -8.0300000e-03
  -6.6000000e-04
   2.4100000e-03
  -1.8600000e-03
  -1.5400000e-03
  -2.7400000e-03
   1.4000000e-03
   5.2000000e-04
  -1.0400000e-03
  -5.6500000e-03
  -7.4600000e-03
  -1.4780000e-02
  -6.4200000e-03
   1.0390000e-02
   2.5500000e-03
   7.5400000e-03
   1.0060000e-02
   9.8700000e-03
   2.7400000e-03
  -3.1500000e-03
  -9.3500000e-03
  -8.6600000e-03
  -2.4240000e-02
  -2.4870000e-02
  -2.1990000e-02
  -9.9800000e-03
   2.1400000e-03
  -4.9000000e-04
   4.1400000e-03
   6.8300000e-03
   1.0400000e-03
   2.2200000e-03
   0.0000000e+00
  -2.5000000e-04
  -1.4260000e-02
  -2.6240000e-02
  -1.7110000e-02
  -1.4370000e-02
  -1.6180000e-02
  -1.2750000e-02
  -1.4940000e-02
  -1.6420000e-02
  -1.0990000e-02
  -1.1870000e-02
  -3.6500000e-03
   9.8200000e-03
   8.4400000e-03
   4.4400000e-03
   3.8900000e-03
   9.0200000e-03
   4.2500000e-03
   4.8800000e-03
   8.7500000e-03
   3.9800000e-03
  -1.2600000e-03
   9.9000000e-04
   6.3600000e-03
   1.4150000e-02
   2.1700000e-03
  -3.6700000e-03
   1.0140000e-02
   5.7000000e-03
   4.5800000e-03
  -2.0800000e-03
  -1.1100000e-02
  -9.2400000e-03
  -1.5160000e-02
  -1.6830000e-02
  -2.4810000e-02
  -2.1330000e-02
  -1.5790000e-02
  -2.5750000e-02
  -2.1520000e-02
  -1.7630000e-02
  -4.4100000e-03
  -2.1700000e-03
   5.3200000e-03
   5.7000000e-03
   2.0000000e-03
   5.2100000e-03
   6.4700000e-03
   1.1930000e-02
   7.9200000e-03
   3.1500000e-03
   5.2600000e-03
   1.4610000e-02
   1.8400000e-03
  -5.0000000e-05
  -1.6000000e-04
   4.1700000e-03
   4.8500000e-03
   5.0000000e-05
   3.9800000e-03
   7.1600000e-03
   6.2200000e-03
  -3.0200000e-03
  -4.8300000e-03
   2.3000000e-03
  -2.4100000e-03
  -1.7140000e-02
  -3.7600000e-03
  -1.0090000e-02
  -8.4200000e-03
  -4.6600000e-03
  -6.7400000e-03
   4.4400000e-03
   8.8000000e-04
  -3.6200000e-03
  -5.2400000e-03
   5.2600000e-03
   4.9900000e-03
  -5.8000000e-04
   2.1400000e-03
   4.7400000e-03
   6.1100000e-03
  -1.3430000e-02
  -7.4900000e-03
   1.0360000e-02
   1.2600000e-03
  -3.4800000e-03
   6.5000000e-03
   6.8000000e-03
   6.3900000e-03
  -2.1700000e-03
   2.9600000e-03
   7.0500000e-03
  -1.2900000e-03
  -1.9000000e-04
  -9.6500000e-03
  -8.3100000e-03
  -4.3600000e-03
  -6.9900000e-03
  -1.2390000e-02
  -1.2260000e-02
  -2.0600000e-03
  -5.8900000e-03
  -1.3270000e-02
  -2.1990000e-02
  -1.7220000e-02
  -4.9400000e-03
   1.0450000e-02
   1.5330000e-02
   7.2100000e-03
  -3.4300000e-03
  -3.5400000e-03
   8.2000000e-04
  -6.3100000e-03
  -1.4500000e-03
   1.6500000e-03
   3.4800000e-03
   2.9900000e-03
  -1.8100000e-03
   5.7000000e-03
   1.7500000e-03
  -1.2690000e-02
  -1.1930000e-02
  -8.2500000e-03
   2.2200000e-03
  -2.1100000e-03
   1.4000000e-04
   1.6500000e-03
   5.7300000e-03
   4.0300000e-03
  -2.4070000e-02
  -9.6200000e-03
  -4.7700000e-03
  -7.9200000e-03
  -1.0700000e-03
  -8.4400000e-03
  -9.4300000e-03
  -2.3770000e-02
  -2.9420000e-02
  -1.9140000e-02
  -8.3100000e-03
  -3.6000000e-04
  -2.1400000e-03
   4.1700000e-03
   4.9900000e-03
  -1.7000000e-03
   5.5900000e-03
   1.0780000e-02
   8.2300000e-03
   4.6900000e-03
  -3.7800000e-03
   1.7300000e-03
   5.1800000e-03
  -9.6000000e-04
  -4.3000000e-03
  -4.0600000e-03
   4.8500000e-03
   1.5100000e-03
  -1.8900000e-03
   6.5500000e-03
   6.1700000e-03
  -1.0100000e-03
  -7.0700000e-03
  -1.2900000e-03
   2.3600000e-03
  -1.8210000e-02
  -1.3850000e-02
  -8.8300000e-03
  -1.0450000e-02
   4.4000000e-04
   2.4700000e-03
   4.4100000e-03
   2.0600000e-03
   7.4600000e-03
  -3.1500000e-03
  -7.5700000e-03
  -8.6100000e-03
  -2.2350000e-02
  -2.3550000e-02
  -1.6310000e-02
   3.4000000e-03
   5.7000000e-03
   1.6700000e-03
   3.6700000e-03
  -4.1000000e-04
  -5.2000000e-04
  -7.3500000e-03
  -1.1050000e-02
  -1.1270000e-02
   3.3000000e-04
  -5.2100000e-03
  -1.2060000e-02
  -1.2690000e-02
   2.4100000e-03
   1.8100000e-03
  -8.6100000e-03
  -2.3900000e-03
  -1.1680000e-02
  -8.3400000e-03
  -1.1790000e-02
  -1.4260000e-02
  -1.5880000e-02
  -2.8800000e-03
   1.0010000e-02
   1.0750000e-02
   5.9200000e-03
   5.8700000e-03
   7.7900000e-03
   4.7400000e-03
   1.7300000e-03
   5.0700000e-03
   1.3380000e-02
   9.8200000e-03
   2.9900000e-03
  -2.5500000e-03
   1.1350000e-02
   1.0280000e-02
  -1.0400000e-03
  -3.3500000e-03
   6.9100000e-03
   1.0400000e-03
  -2.0890000e-02
  -2.3250000e-02
   3.8000000e-04
   1.3710000e-02
   1.0040000e-02
   3.3200000e-03
   6.7200000e-03
   8.2300000e-03
  -5.0700000e-03
  -1.8400000e-03
   2.0600000e-03
   7.5700000e-03
   8.3100000e-03
   2.2200000e-03
   9.0500000e-03
   7.6800000e-03
  -1.0700000e-03
   6.0000000e-04
  -2.9900000e-03
   2.0600000e-03
  -2.1400000e-03
  -2.9600000e-03
   1.0040000e-02
   9.7100000e-03
   1.5900000e-03
   2.6300000e-03
   8.6900000e-03
   7.7000000e-03
   4.3600000e-03
   2.3300000e-03
   1.5600000e-03
   7.7300000e-03
   4.7700000e-03
   3.5100000e-03
   6.7200000e-03
   5.4300000e-03
   5.5000000e-04
  -7.0700000e-03
   4.0000000e-03
   1.6730000e-02
   2.2800000e-03
   2.6000000e-03
   1.9500000e-03
   3.0400000e-03
   4.0900000e-03
   5.7600000e-03
   5.7600000e-03
  -4.7000000e-04
  -4.1400000e-03
  -4.2200000e-03
   1.0310000e-02
   1.4370000e-02
   5.4000000e-03
   4.1900000e-03
   1.9500000e-03
   6.3900000e-03
  -4.2800000e-03
  -2.9600000e-03
   1.0450000e-02
   6.7700000e-03
  -8.8000000e-04
  -2.6000000e-03
   2.3300000e-03
  -5.0000000e-05
  -1.4300000e-03
  -4.4000000e-04
  -1.6500000e-03
  -1.5900000e-03
   1.1500000e-03
  -2.1100000e-03
  -8.2000000e-04
   3.6700000e-03
  -1.8400000e-03
   4.4000000e-04
   5.2900000e-03
   5.4300000e-03
  -5.1500000e-03
  -6.1700000e-03
   1.8100000e-03
   3.4300000e-03
  -2.5800000e-03
  -6.2000000e-03
   1.5900000e-03
   2.0600000e-03
  -8.8000000e-04
   5.4600000e-03
   1.4000000e-04
   1.2100000e-03
   5.0000000e-05
  -3.8700000e-03
   5.6500000e-03
   2.9100000e-03
  -2.6300000e-03
  -3.8400000e-03
   6.9400000e-03
   1.1570000e-02
   4.5200000e-03
   3.4300000e-03
   2.8200000e-03
  -2.5200000e-03
  -4.2500000e-03
   2.8500000e-03
   1.1430000e-02
   3.4000000e-03
  -1.5100000e-03
  -1.3200000e-03
  -1.6700000e-03
  -5.8000000e-04
   7.7300000e-03
  -4.7000000e-04
   6.5500000e-03
   5.8100000e-03
  -6.0300000e-03
  -4.2500000e-03
  -4.4000000e-04
   5.4000000e-03
  -4.9100000e-03
  -8.8000000e-03
   1.2150000e-02
   9.3500000e-03
   5.2000000e-04
  -2.6600000e-03
   1.8100000e-03
  -1.5100000e-03
  -5.4800000e-03
   1.1500000e-03
   9.6000000e-04
  -4.7700000e-03
  -1.0340000e-02
  -3.1300000e-03
   5.8400000e-03
   7.1300000e-03
  -1.6200000e-03
  -4.8300000e-03
   3.7800000e-03
   5.0700000e-03
   3.6200000e-03
  -8.8000000e-04
   1.9200000e-03
   7.1300000e-03
   2.2200000e-03
  -1.6000000e-04
   3.3000000e-04
  -6.9000000e-04
  -6.6600000e-03
  -6.5000000e-03
  -3.6500000e-03
  -9.7600000e-03
  -6.5800000e-03
  -4.8800000e-03
   1.4800000e-03
  -3.0000000e-04
  -8.0900000e-03
  -6.2200000e-03
   6.6000000e-04
   3.1300000e-03
   1.1000000e-04
  -9.0000000e-04
  -1.5400000e-03
   1.4500000e-03
   5.8000000e-04
  -9.9000000e-04
   2.4100000e-03
   5.8700000e-03
   1.1000000e-04
  -5.5400000e-03
   3.2600000e-03
   2.6000000e-03
  -4.8500000e-03
  -4.4700000e-03
   1.8900000e-03
   2.5000000e-04
  -5.3500000e-03
  -5.5700000e-03
  -2.8200000e-03
  -5.8000000e-04
   3.5900000e-03
   5.2600000e-03
   6.9000000e-04
   1.2900000e-03
  -3.2400000e-03
  -3.9800000e-03
   4.7200000e-03
  -8.0000000e-04
  -7.4000000e-04
   7.7000000e-04
   3.7300000e-03
   4.2800000e-03
   3.6000000e-04
   1.5400000e-03
   2.3900000e-03
   5.0000000e-05
  -4.0000000e-03
  -2.9600000e-03
   3.4000000e-03
   3.4300000e-03
  -5.0200000e-03
  -2.2200000e-03
  -1.6000000e-04
   3.7000000e-03
   1.5900000e-03
  -5.5700000e-03
  -3.1300000e-03
  -8.4400000e-03
  -5.8700000e-03
   3.8000000e-04
   7.6800000e-03
   5.3200000e-03
  -5.7000000e-03
  -4.4700000e-03
   2.7400000e-03
   1.9500000e-03
  -3.3200000e-03
  -3.6200000e-03
   2.7700000e-03
   6.3900000e-03
   1.9500000e-03
  -1.0100000e-03
  -2.5000000e-04
  -3.1500000e-03
  -4.0000000e-03
   4.6300000e-03
   5.0400000e-03
  -7.6200000e-03
  -1.5190000e-02
  -1.3400000e-03
   1.0450000e-02
   8.2500000e-03
  -2.5800000e-03
  -5.6500000e-03
  -4.2200000e-03
  -7.9800000e-03
  -4.3900000e-03
   0.0000000e+00
  -8.0000000e-05
   2.9100000e-03
  -3.4300000e-03
  -1.0530000e-02
  -5.8000000e-04
   6.1400000e-03
   2.6300000e-03
   1.8100000e-03
   5.8000000e-04
   1.8900000e-03
  -3.7800000e-03
  -6.7400000e-03
   2.5000000e-03
  -9.3000000e-04
  -3.0200000e-03
  -1.3400000e-03
  -4.3900000e-03
  -6.7700000e-03
  -6.9900000e-03
  -1.0450000e-02
   1.4000000e-04
   2.7100000e-03
  -8.2000000e-04
  -4.4100000e-03
  -5.7900000e-03
  -1.5900000e-03
  -5.4800000e-03
  -4.7000000e-04
   3.2400000e-03
  -6.6100000e-03
  -2.8000000e-03
  -4.9900000e-03
   5.1300000e-03
   7.5100000e-03
   1.8400000e-03
   8.5000000e-04
  -4.1100000e-03
  -3.8900000e-03
  -1.9500000e-03
  -1.4800000e-03
   2.0800000e-03
  -1.1800000e-03
  -3.4300000e-03
  -2.1700000e-03
  -2.8000000e-03
  -2.2500000e-03
  -6.3300000e-03
  -8.4400000e-03
   4.9000000e-04
   4.9000000e-04
  -1.1000000e-03
  -1.9000000e-04
   2.8800000e-03
   2.3900000e-03
  -7.7000000e-03
  -5.2900000e-03
   1.3700000e-03
  -3.6700000e-03
  -8.0000000e-04
  -6.9000000e-04
   3.0400000e-03
   2.7100000e-03
   1.3200000e-03
  -9.6000000e-04
  -3.0000000e-04
   8.0000000e-04
  -4.0000000e-03
  -8.9700000e-03
   3.3000000e-04
  -2.7000000e-04
  -1.2300000e-03
   3.7000000e-03
   6.2200000e-03
   4.7400000e-03
  -2.6000000e-03
  -3.2600000e-03
  -1.2100000e-03
  -3.8000000e-04
   1.7300000e-03
   2.7700000e-03
   3.4800000e-03
   2.4700000e-03
  -4.4700000e-03
  -2.0800000e-03
   5.2100000e-03
   9.3000000e-04
   1.1200000e-03
  -2.1100000e-03
   8.5000000e-04
  -2.9100000e-03
  -5.1800000e-03
   3.7600000e-03
  -2.0300000e-03
  -1.6700000e-03
  -6.9100000e-03
  -8.9700000e-03
   2.7000000e-04
  -6.2800000e-03
  -2.4070000e-02
  -3.2160000e-02
  -1.7900000e-02
  -2.0600000e-03
  -1.4450000e-02
  -1.1680000e-02
  -1.5400000e-03
  -2.0890000e-02
  -2.2100000e-02
  -2.5640000e-02
  -2.2950000e-02
  -5.2400000e-03
  -9.3500000e-03
   5.2900000e-03
   4.0300000e-03
  -1.1000000e-04
   2.0300000e-03
  -5.8000000e-04
   8.2000000e-03
   1.0100000e-03
  -1.8100000e-03
   3.2900000e-03
  -5.8700000e-03
  -1.6120000e-02
  -3.3400000e-02
  -3.6600000e-02
  -2.8490000e-02
  -2.5960000e-02
  -1.8010000e-02
  -2.1140000e-02
  -1.3790000e-02
  -8.3400000e-03
  -1.8920000e-02
   6.3600000e-03
   1.1570000e-02
   2.8800000e-03
   8.0000000e-05
   3.0700000e-03
   1.5630000e-02
   8.4700000e-03
   3.9200000e-03
   8.5300000e-03
   1.2640000e-02
   1.0360000e-02
   6.0600000e-03
   9.9000000e-03
   1.2750000e-02
   1.7300000e-03
  -3.4500000e-03
  -3.8900000e-03
   4.1000000e-04
  -4.1400000e-03
  -2.5910000e-02
  -6.9000000e-04
   1.6000000e-04
  -1.5600000e-03
  -1.7520000e-02
  -1.5220000e-02
   1.0580000e-02
   7.6200000e-03
  -4.9900000e-03
  -7.1800000e-03
   1.5110000e-02
   5.5100000e-03
   4.6600000e-03
   5.4800000e-03
   2.9900000e-03
   3.9200000e-03
  -9.4300000e-03
  -1.8560000e-02
  -2.1280000e-02
  -2.1410000e-02
  -2.3220000e-02
  -2.4100000e-03
   1.5680000e-02
   1.1270000e-02
  -1.1100000e-02
  -7.4300000e-03
   2.5500000e-03
   4.1000000e-04
  -6.1100000e-03
  -7.8100000e-03
  -5.2400000e-03
  -1.8890000e-02
  -3.3310000e-02
  -2.1630000e-02
  -1.1870000e-02
  -2.0430000e-02
  -1.0420000e-02
   7.5700000e-03
   1.2450000e-02
   1.5900000e-02
  -3.1000000e-03
  -1.2970000e-02
  -7.9500000e-03
   5.1300000e-03
   7.9800000e-03
   3.7800000e-03
   9.8400000e-03
  -5.6800000e-03
  -1.6150000e-02
  -1.5930000e-02
  -9.9800000e-03
  -7.4600000e-03
  -7.1800000e-03
   1.0140000e-02
   1.2260000e-02
   3.7800000e-03
  -2.1220000e-02
  -1.1540000e-02
  -1.1050000e-02
  -1.1020000e-02
  -1.6420000e-02
  -1.4150000e-02
  -2.9900000e-03
   6.5500000e-03
  -9.1300000e-03
  -1.0720000e-02
   3.8000000e-04
   2.1580000e-02
   8.9900000e-03
   7.0200000e-03
  -8.0300000e-03
  -1.3160000e-02
   2.9600000e-03
   3.4300000e-03
   9.2100000e-03
   9.6800000e-03
   9.5100000e-03
   7.5100000e-03
   1.4800000e-03
   3.5100000e-03
  -5.8700000e-03
  -1.9270000e-02
  -9.2400000e-03
  -8.3400000e-03
  -1.4940000e-02
  -1.2480000e-02
   3.3500000e-03
   9.6800000e-03
   5.6200000e-03
   1.1000000e-04
  -1.0610000e-02
  -9.6000000e-03
  -2.0260000e-02
  -1.7440000e-02
  -1.8180000e-02
  -2.9100000e-03
  -9.8200000e-03
   7.1300000e-03
   9.2900000e-03
  -9.0500000e-03
  -6.0600000e-03
  -1.1630000e-02
  -1.1430000e-02
  -2.0150000e-02
  -1.2640000e-02
   2.0000000e-03
   3.3700000e-03
   7.0700000e-03
   1.0040000e-02
  -1.5100000e-03
  -5.2600000e-03
  -8.8800000e-03
   1.2300000e-03
  -3.0000000e-05
   6.4200000e-03
  -8.0000000e-04
  -1.9410000e-02
  -4.4000000e-04
   1.2370000e-02
   1.1350000e-02
   1.2310000e-02
   9.6000000e-04
  -2.6300000e-03
   2.8000000e-03
   7.7000000e-04
  -8.6100000e-03
  -5.3700000e-03
  -3.0200000e-03
  -5.3200000e-03
  -1.1540000e-02
  -6.7700000e-03
  -9.0200000e-03
  -9.7600000e-03
   2.8000000e-03
  -1.3540000e-02
   4.1700000e-03
   2.8200000e-03
   6.8300000e-03
   4.1400000e-03
  -1.2010000e-02
   8.1400000e-03
   1.0060000e-02
   8.2300000e-03
   5.3200000e-03
  -4.5500000e-03
  -1.5660000e-02
  -1.0860000e-02
  -5.4000000e-03
  -6.9000000e-04
   5.8100000e-03
  -1.1980000e-02
  -1.5350000e-02
  -1.6700000e-02
  -3.2900000e-03
   1.8640000e-02
   9.7300000e-03
   9.4300000e-03
   1.3540000e-02
   7.3200000e-03
   4.7700000e-03
  -1.6700000e-03
  -1.1650000e-02
  -9.8400000e-03
  -3.8900000e-03
   6.5500000e-03
   1.2260000e-02
   2.0020000e-02
   1.3740000e-02
   1.1980000e-02
   1.3760000e-02
   1.4970000e-02
   1.4150000e-02
   1.3790000e-02
   1.5460000e-02
   1.4940000e-02
   9.6200000e-03
   4.9100000e-03
   8.3400000e-03
   8.7200000e-03
   6.3000000e-04
  -4.9900000e-03
  -8.6600000e-03
   1.6620000e-02
   1.3870000e-02
  -6.3000000e-04
   1.9700000e-03
   4.9100000e-03
  -4.8800000e-03
  -1.4940000e-02
  -2.5000000e-03
   6.0600000e-03
  -4.9600000e-03
   2.5200000e-03
   1.6040000e-02
   8.9100000e-03
  -6.8500000e-03
  -1.7660000e-02
  -1.5190000e-02
  -1.1320000e-02
   4.3300000e-03
  -1.2120000e-02
  -9.3500000e-03
  -6.5000000e-03
  -9.8700000e-03
  -1.5030000e-02
  -1.8840000e-02
  -6.7700000e-03
  -1.0310000e-02
  -7.3500000e-03
   1.2750000e-02
   1.0530000e-02
   7.7000000e-03
  -4.0600000e-03
   3.2100000e-03
   8.0900000e-03
   4.4400000e-03
   4.7700000e-03
   9.7600000e-03
   1.5410000e-02
   1.3110000e-02
  -2.2500000e-03
   9.6000000e-04
   9.3800000e-03
   8.8300000e-03
   7.0700000e-03
   3.6000000e-04
  -7.4000000e-03
  -1.8900000e-03
  -1.6530000e-02
  -1.0860000e-02
  -5.5900000e-03
  -1.9300000e-02
  -1.7820000e-02
  -1.0940000e-02
  -7.3200000e-03
  -1.1350000e-02
   5.1300000e-03
   8.8600000e-03
   8.3400000e-03
   1.0280000e-02
   1.7300000e-03
  -2.1100000e-03
  -4.7000000e-04
   8.5000000e-04
   1.4500000e-03
   1.2280000e-02
   1.1790000e-02
   5.4600000e-03
  -2.1100000e-03
  -1.0310000e-02
  -1.7410000e-02
  -9.2900000e-03
   6.0300000e-03
   7.7000000e-03
   1.0310000e-02
   6.7700000e-03
   6.6600000e-03
   6.0900000e-03
   6.4700000e-03
   5.6200000e-03
   6.2000000e-03
   8.3600000e-03
   1.2060000e-02
   9.9500000e-03
   8.4400000e-03
   5.3500000e-03
   4.2800000e-03
   0.0000000e+00
  -3.3500000e-03
   2.5500000e-03
   3.6000000e-04
   1.4800000e-03
  -1.9500000e-03
   5.1000000e-03
   1.6070000e-02
   6.0300000e-03
  -2.2800000e-03
   3.8000000e-04
   6.9600000e-03
   4.4700000e-03
  -9.6800000e-03
   2.6300000e-03
   7.5900000e-03
  -2.4700000e-03
   2.7100000e-03
   1.6700000e-03
   3.4800000e-03
  -7.9000000e-03
  -3.7300000e-03
   6.9400000e-03
   1.0100000e-03
  -1.8900000e-03
  -5.5900000e-03
  -4.4100000e-03
   1.7300000e-03
   1.4500000e-03
  -7.1000000e-04
   3.6000000e-04
   1.4000000e-03
   6.3000000e-04
  -2.9100000e-03
  -2.1400000e-03
  -1.5400000e-03
  -7.9500000e-03
  -6.5300000e-03
   4.4000000e-04
   1.0670000e-02
   4.7700000e-03
  -6.3600000e-03
   3.7600000e-03
  -8.2000000e-04
  -2.4760000e-02
  -1.9470000e-02
  -2.2200000e-03
  -1.6620000e-02
  -1.4810000e-02
  -1.2600000e-03
   2.4400000e-03
   4.4100000e-03
   3.8100000e-03
   5.5000000e-04
  -2.2000000e-04
   4.8500000e-03
  -7.6200000e-03
  -9.0000000e-04
  -1.4000000e-03
   2.5800000e-03
  -3.5600000e-03
  -2.6290000e-02
  -1.4830000e-02
  -1.3220000e-02
  -1.8070000e-02
  -1.4480000e-02
  -1.6290000e-02
  -3.6000000e-04
   3.9500000e-03
   1.5100000e-03
   9.1600000e-03
   5.3500000e-03
   5.0000000e-05
  -6.9400000e-03
  -7.1000000e-04
  -1.0280000e-02
  -2.6130000e-02
  -2.3500000e-02
  -1.9250000e-02
  -2.1630000e-02
  -2.6510000e-02
  -2.3910000e-02
  -5.4600000e-03
   1.7500000e-03
  -1.0400000e-03
  -6.2000000e-03
  -5.2100000e-03
  -2.0300000e-03
  -5.7000000e-03
  -2.5200000e-03
   5.0000000e-05
   3.3200000e-03
  -5.2600000e-03
  -7.6200000e-03
  -5.0000000e-05
  -2.0800000e-03
  -9.1600000e-03
  -1.0890000e-02
   6.0000000e-04
   6.5300000e-03
  -2.3600000e-03
  -7.4900000e-03
  -4.6900000e-03
  -3.3500000e-03
  -3.2400000e-03
  -6.8300000e-03
  -2.0000000e-03
  -8.8000000e-04
  -2.6000000e-03
  -4.9900000e-03
   1.4800000e-03
   4.7200000e-03
  -6.7400000e-03
  -6.4400000e-03
  -2.0800000e-03
   3.1800000e-03
   4.4000000e-04
  -4.7400000e-03
   9.0000000e-04
   3.1800000e-03
  -3.7800000e-03
  -2.9900000e-03
   4.3000000e-03
   5.1800000e-03
   2.2000000e-04
   2.8500000e-03
   1.0830000e-02
   1.3600000e-02
   4.6300000e-03
  -2.3600000e-03
   2.8800000e-03
  -2.1400000e-03
  -2.5280000e-02
  -2.9260000e-02
  -2.5550000e-02
  -2.1280000e-02
  -9.8200000e-03
   0.0000000e+00
   3.4300000e-03
   5.2900000e-03
   4.8800000e-03
  -3.0700000e-03
   6.6600000e-03
   1.3520000e-02
  -1.9690000e-02
  -2.4160000e-02
  -1.9030000e-02
  -1.5380000e-02
  -1.8860000e-02
  -2.7700000e-03
   1.6180000e-02
   2.0600000e-03
  -1.5900000e-03
  -3.5900000e-03
   2.6300000e-03
   8.3100000e-03
   3.8000000e-04
  -2.0020000e-02
  -2.4980000e-02
  -2.3420000e-02
  -1.3740000e-02
  -6.5500000e-03
  -3.8000000e-04
   1.6700000e-03
  -3.4300000e-03
  -7.8700000e-03
  -6.5300000e-03
   5.1800000e-03
  -1.3190000e-02
  -2.1330000e-02
  -1.6420000e-02
  -1.7470000e-02
  -2.6650000e-02
  -2.1330000e-02
  -4.0300000e-03
  -1.7500000e-03
   3.5100000e-03
   3.0400000e-03
   8.8000000e-03
   2.6300000e-03
  -2.3300000e-03
  -6.4400000e-03
   2.9100000e-03
   1.4230000e-02
   5.9200000e-03
   8.0000000e-05
   4.8000000e-03
   3.0000000e-04
  -7.1000000e-04
  -1.9000000e-04
   6.3900000e-03
   3.1300000e-03
  -3.6700000e-03
   9.6000000e-04
   1.8400000e-03
   8.6600000e-03
   2.6300000e-03
  -2.3000000e-03
   4.7200000e-03
   5.0700000e-03
   1.4500000e-03
  -5.7000000e-03
  -3.3500000e-03
   4.6900000e-03
   8.2500000e-03
   4.0000000e-03
   1.0990000e-02
   9.0800000e-03
   1.2600000e-03
  -5.8000000e-04
   3.2100000e-03
   5.8100000e-03
  -1.9200000e-03
  -1.6700000e-03
   5.0400000e-03
   4.6600000e-03
   1.2600000e-03
  -4.9000000e-04
   4.5200000e-03
   1.1570000e-02
   7.9200000e-03
   1.2170000e-02
   1.3680000e-02
   1.0830000e-02
   1.5820000e-02
   4.9400000e-03
   9.9000000e-03
   1.2200000e-02
   2.4700000e-03
   1.3380000e-02
   1.2200000e-02
   5.9800000e-03
   9.0500000e-03
   1.1760000e-02
   1.5380000e-02
   1.6040000e-02
   8.8600000e-03
   8.2000000e-03
   6.3300000e-03
   1.7600000e-02
   8.3600000e-03
  -5.4300000e-03
   3.6200000e-03
   1.0970000e-02
   1.4500000e-02
   1.2090000e-02
   6.1100000e-03
   4.4700000e-03
  -8.5500000e-03
  -3.6500000e-03
   3.0000000e-05
   5.5700000e-03
  -3.0400000e-03
  -8.4200000e-03
   2.8000000e-03
   4.8500000e-03
   3.5900000e-03
  -2.1400000e-03
  -7.7000000e-04
   2.1100000e-03
   1.1500000e-03
   1.5400000e-03
   1.4010000e-02
   1.1840000e-02
   9.1900000e-03
   7.3800000e-03
   1.1020000e-02
   5.2900000e-03
  -6.9400000e-03
  -9.2900000e-03
  -7.5900000e-03
  -8.8300000e-03
  -4.8800000e-03
  -3.6200000e-03
   6.8800000e-03
   9.5700000e-03
  -4.5500000e-03
  -7.1000000e-04
  -4.4700000e-03
  -1.8400000e-03
  -9.9000000e-04
  -4.6300000e-03
  -3.9800000e-03
