# Supplementary material for: A Novel Classification Method for Flutter Signals Based on the CNN and STFT
Source: Hindawi journal article supplement (doi:10.1155/2019/9375437), 2019-04-09
Supplement: f1 [file 9375437.f1.zip › 00_25_z15.0_19channel.txt]

  -1.0542000e-01
  -3.6250000e-02
   2.6180000e-02
  -7.3700000e-02
   1.4260000e-02
  -1.4390000e-02
   1.5790000e-02
  -7.5700000e-02
   5.3330000e-02
  -6.2050000e-02
   3.1910000e-02
   5.8040000e-02
  -3.9540000e-02
  -9.2070000e-02
   5.1980000e-02
  -6.5000000e-03
  -5.5660000e-02
   1.3874000e-01
  -5.8590000e-02
  -2.4870000e-02
   4.5020000e-02
  -2.7640000e-02
   6.3100000e-03
   6.2650000e-02
  -4.3210000e-02
  -8.6610000e-02
   3.4790000e-02
  -2.2870000e-02
  -4.0800000e-02
  -1.0375000e-01
   9.5400000e-03
   3.5420000e-02
  -2.3720000e-02
   9.3500000e-03
  -4.7680000e-02
   7.9900000e-02
   3.3700000e-03
  -1.4211000e-01
   9.6570000e-02
   1.1600000e-02
  -9.2730000e-02
   1.6340000e-02
   3.0110000e-02
  -1.3960000e-02
  -9.9090000e-02
  -4.3300000e-03
   7.3260000e-02
  -9.4350000e-02
  -4.8390000e-02
   6.5200000e-02
  -4.5820000e-02
   2.1080000e-02
  -2.0840000e-02
   1.0170000e-02
   2.0300000e-03
  -2.2260000e-02
  -2.3720000e-02
  -2.5420000e-02
   1.7820000e-02
  -1.4000000e-03
  -1.1050000e-02
  -3.8880000e-02
  -3.6050000e-02
   1.0100000e-03
  -2.9340000e-02
  -4.3700000e-02
  -7.3800000e-03
  -7.4820000e-02
   1.6730000e-02
   4.1540000e-02
  -1.7110000e-02
   1.2174000e-01
   3.3720000e-02
  -5.9850000e-02
   9.6000000e-04
   5.5250000e-02
   7.6800000e-03
  -9.0320000e-02
  -1.4000000e-03
   8.2670000e-02
  -1.2662000e-01
  -9.0120000e-02
   9.2480000e-02
  -4.6360000e-02
   2.3500000e-02
  -5.9170000e-02
  -2.0340000e-02
   1.4570000e-01
  -1.3002000e-01
  -5.1790000e-02
   4.0960000e-02
   2.4350000e-02
  -2.7990000e-02
   2.7610000e-02
   9.2020000e-02
  -5.9470000e-02
   1.5160000e-02
   9.2620000e-02
  -8.4860000e-02
  -1.4890000e-02
   1.0040000e-02
  -4.4700000e-03
  -3.2980000e-02
   4.8300000e-03
  -2.6210000e-02
  -6.6490000e-02
   7.3510000e-02
   4.6420000e-02
  -4.8830000e-02
  -2.2130000e-02
   4.7380000e-02
   5.9850000e-02
  -6.5010000e-02
   1.0100000e-03
   5.9200000e-03
   9.1220000e-02
  -1.2881000e-01
  -2.0510000e-02
   1.0378000e-01
  -5.6230000e-02
  -3.0900000e-02
  -3.7100000e-02
   7.0410000e-02
  -2.2650000e-02
  -2.4650000e-02
  -7.1000000e-04
   4.1260000e-02
  -4.1480000e-02
  -1.6200000e-03
   2.8570000e-02
   3.8330000e-02
  -5.2970000e-02
  -3.3560000e-02
   2.0180000e-02
   4.6830000e-02
   2.5420000e-02
  -1.0238000e-01
   1.2230000e-02
   1.2821000e-01
  -1.3715000e-01
  -1.0060000e-01
   7.8580000e-02
  -2.0020000e-02
   1.4230000e-02
  -5.7080000e-02
   1.0780000e-02
   1.0104000e-01
  -2.7450000e-02
  -9.2150000e-02
   9.0750000e-02
   1.6200000e-02
  -6.8220000e-02
  -1.6450000e-02
   3.5120000e-02
  -1.6370000e-02
  -5.1410000e-02
   5.0400000e-03
   1.4590000e-02
  -2.2760000e-02
  -4.6670000e-02
  -2.6570000e-02
   1.3569000e-01
  -8.5490000e-02
  -9.6200000e-03
   6.3910000e-02
   5.4320000e-02
   1.5900000e-02
  -2.3000000e-02
   5.1330000e-02
  -6.3340000e-02
  -7.0460000e-02
   2.6000000e-03
   3.5040000e-02
  -7.6580000e-02
  -7.7480000e-02
   8.2800000e-03
   8.1460000e-02
  -1.0390000e-02
  -3.4600000e-02
  -4.5730000e-02
   7.7150000e-02
  -3.4850000e-02
   3.1260000e-02
  -7.7000000e-03
  -3.8520000e-02
   4.5050000e-02
  -2.3830000e-02
   3.8820000e-02
  -5.5550000e-02
   5.3740000e-02
  -8.9490000e-02
   3.5400000e-03
   1.2105000e-01
  -2.9800000e-02
  -5.8650000e-02
  -7.1000000e-04
   6.2240000e-02
  -4.9190000e-02
  -3.6250000e-02
  -1.9500000e-03
   5.4180000e-02
  -6.5200000e-02
  -3.1170000e-02
   6.7640000e-02
  -5.6480000e-02
  -6.6000000e-02
   2.8210000e-02
  -1.6200000e-03
  -4.8010000e-02
   3.4190000e-02
  -3.6880000e-02
   6.9260000e-02
   5.4180000e-02
   5.2000000e-04
  -9.2700000e-03
  -7.8110000e-02
   9.2290000e-02
  -6.9040000e-02
  -6.5170000e-02
   1.2300000e-03
   2.2000000e-04
  -5.6800000e-03
  -4.1210000e-02
   4.9160000e-02
  -5.7410000e-02
  -1.9990000e-02
   3.2680000e-02
   8.0660000e-02
   1.3020000e-02
  -8.1080000e-02
   7.9870000e-02
  -9.1300000e-03
  -8.9930000e-02
  -2.2320000e-02
   8.8480000e-02
  -8.8860000e-02
   1.2300000e-03
   2.4240000e-02
   5.4000000e-03
   1.7800000e-03
   5.4230000e-02
  -2.0620000e-02
  -7.0630000e-02
   6.3500000e-02
  -1.5330000e-02
  -3.8700000e-03
   9.6200000e-03
   4.7300000e-02
  -9.7600000e-03
  -1.0054000e-01
   6.2980000e-02
   3.6930000e-02
  -6.2160000e-02
   1.3790000e-02
  -2.0840000e-02
  -8.8600000e-03
  -1.2600000e-03
   4.4200000e-02
  -1.0751000e-01
   1.2500000e-02
   3.2740000e-02
  -2.4290000e-02
   1.9060000e-02
   4.4610000e-02
   1.0360000e-02
  -9.0040000e-02
   2.8490000e-02
   2.2150000e-02
  -7.9460000e-02
  -3.5400000e-02
   4.2640000e-02
  -3.9920000e-02
  -3.7890000e-02
   1.1006000e-01
   3.9290000e-02
  -5.5960000e-02
   3.9450000e-02
   4.9760000e-02
   6.3060000e-02
  -4.9330000e-02
  -8.0200000e-02
   1.3520000e-02
   1.1730000e-02
  -1.0348000e-01
   1.3032000e-01
  -4.9100000e-03
  -6.8130000e-02
  -1.4480000e-02
  -2.0560000e-02
   4.7430000e-02
  -3.3200000e-02
  -3.4520000e-02
  -2.6430000e-02
  -5.8320000e-02
  -5.0200000e-03
   5.8870000e-02
  -1.5790000e-02
   3.3000000e-04
  -2.9390000e-02
   9.6210000e-02
  -1.5980000e-02
  -1.0485000e-01
   7.8910000e-02
  -8.7500000e-03
  -8.2860000e-02
  -1.0530000e-02
   5.9200000e-02
  -6.4620000e-02
   4.8800000e-02
  -2.3900000e-03
   3.2100000e-03
   7.5700000e-03
  -3.4490000e-02
   7.5400000e-02
   7.5900000e-03
  -7.7000000e-04
  -1.1760000e-02
  -2.0430000e-02
   4.1920000e-02
  -1.1790000e-02
  -9.4670000e-02
  -2.6270000e-02
   4.9540000e-02
  -3.9560000e-02
  -5.6480000e-02
   5.8320000e-02
  -3.5700000e-02
  -6.8350000e-02
   3.4440000e-02
   4.5240000e-02
  -2.4760000e-02
  -8.0000000e-05
   9.4700000e-02
  -1.8400000e-02
  -6.1530000e-02
   6.8870000e-02
   3.3750000e-02
  -9.2650000e-02
   1.8340000e-02
   5.9660000e-02
  -9.3690000e-02
   3.7860000e-02
  -4.1370000e-02
   3.7430000e-02
   4.5540000e-02
  -8.2420000e-02
  -5.0000000e-05
   8.4400000e-03
   2.1100000e-03
   1.2280000e-02
   1.7660000e-02
  -7.4960000e-02
   5.9960000e-02
  -3.6740000e-02
  -1.9520000e-02
  -2.8820000e-02
  -4.2170000e-02
   6.1170000e-02
  -3.7700000e-02
  -5.8840000e-02
   4.2850000e-02
   8.2300000e-03
  -7.3500000e-03
   1.1000000e-03
   5.1240000e-02
  -4.9900000e-03
  -8.1730000e-02
   9.1990000e-02
  -1.7850000e-02
  -3.8190000e-02
   1.7360000e-02
  -4.8200000e-02
  -2.5960000e-02
   6.5170000e-02
  -9.4670000e-02
   5.7300000e-03
   8.4690000e-02
  -1.2940000e-02
   1.5410000e-02
  -5.2340000e-02
   1.2090000e-02
  -4.2220000e-02
  -1.1773000e-01
   5.7000000e-02
   8.6830000e-02
  -8.1160000e-02
   3.6440000e-02
   1.0836000e-01
  -2.3330000e-02
  -1.3808000e-01
   1.4724000e-01
   9.9300000e-03
  -6.9700000e-02
   1.9990000e-02
   4.9080000e-02
   4.5160000e-02
  -1.1392000e-01
   4.4530000e-02
   6.2070000e-02
  -1.4450000e-02
  -2.5360000e-02
   3.3120000e-02
   8.2010000e-02
  -7.0740000e-02
   6.9600000e-03
   2.9310000e-02
  -1.5255000e-01
  -2.6130000e-02
  -1.5900000e-03
  -8.2800000e-03
  -5.8980000e-02
  -6.8710000e-02
   8.0530000e-02
  -3.8360000e-02
  -6.8660000e-02
  -3.5700000e-02
   8.8420000e-02
  -5.1300000e-02
  -2.6240000e-02
   8.0010000e-02
  -1.4150000e-02
   1.3520000e-02
   5.3520000e-02
   1.0200000e-02
   3.6800000e-02
  -1.4560000e-02
   1.1320000e-02
  -4.1400000e-02
   3.2300000e-02
  -5.8180000e-02
  -4.2060000e-02
   6.9560000e-02
  -9.2100000e-03
   4.4940000e-02
  -1.8700000e-02
  -5.4750000e-02
   4.2280000e-02
   8.9900000e-03
  -1.0836000e-01
   4.4060000e-02
   2.6240000e-02
  -1.0320000e-01
  -2.9260000e-02
  -1.6860000e-02
   3.1940000e-02
  -5.2970000e-02
  -1.9520000e-02
   5.4120000e-02
  -5.5190000e-02
  -5.1220000e-02
   7.0500000e-03
   8.2610000e-02
  -5.1550000e-02
   1.2230000e-02
   2.3740000e-02
  -2.5640000e-02
   5.7800000e-02
   9.0200000e-03
  -3.0570000e-02
   1.5130000e-02
  -4.8720000e-02
   7.8440000e-02
  -4.0110000e-02
  -5.7930000e-02
   2.3220000e-02
   5.1380000e-02
   3.7450000e-02
  -4.7710000e-02
   2.4460000e-02
   5.0070000e-02
  -6.6630000e-02
   4.4420000e-02
   4.2390000e-02
  -7.8470000e-02
  -4.6390000e-02
   8.2800000e-03
   2.4680000e-02
   9.2900000e-03
  -6.3450000e-02
  -4.2060000e-02
   4.2640000e-02
  -5.5490000e-02
   3.4080000e-02
   2.4070000e-02
  -3.1260000e-02
   4.8890000e-02
   4.0090000e-02
   9.1600000e-03
  -8.4150000e-02
  -2.2670000e-02
   5.4780000e-02
  -7.6360000e-02
   1.5600000e-02
   9.0750000e-02
  -2.2150000e-02
  -1.6310000e-02
   1.0471000e-01
   4.4640000e-02
  -7.8550000e-02
   4.5200000e-03
   3.1610000e-02
   4.9000000e-04
  -4.5490000e-02
  -2.0020000e-02
  -4.3620000e-02
  -2.3300000e-03
  -2.8980000e-02
  -2.7000000e-04
  -4.0830000e-02
   2.0810000e-02
  -6.8790000e-02
  -8.0100000e-03
   5.1000000e-02
  -3.4680000e-02
  -8.3130000e-02
   3.0430000e-02
  -5.6780000e-02
   1.2800000e-02
   2.0950000e-02
  -1.7880000e-02
  -2.1740000e-02
  -2.2260000e-02
   6.2570000e-02
  -6.4790000e-02
  -1.3790000e-02
   6.7700000e-02
   4.2880000e-02
   6.9000000e-04
  -2.7200000e-02
   3.5070000e-02
   4.8800000e-02
  -6.1660000e-02
   3.0700000e-03
   4.8060000e-02
  -3.8960000e-02
  -3.6270000e-02
  -4.1000000e-04
   2.3690000e-02
  -1.2807000e-01
   1.0780000e-02
   1.2910000e-02
  -7.5890000e-02
   1.0340000e-02
  -5.0700000e-02
   2.4570000e-02
  -9.4570000e-02
  -1.4940000e-02
   5.9170000e-02
  -3.3290000e-02
  -4.3460000e-02
   6.0650000e-02
   3.5950000e-02
  -1.9820000e-02
  -6.3280000e-02
   2.1030000e-02
   4.4800000e-02
   4.7870000e-02
  -1.6260000e-02
   2.9830000e-02
  -7.9000000e-03
   4.1130000e-02
  -2.8500000e-03
  -2.2950000e-02
   2.2100000e-02
  -5.2090000e-02
   3.3290000e-02
  -2.6810000e-02
  -1.0592000e-01
  -1.4670000e-02
   8.9990000e-02
  -1.0715000e-01
  -1.5160000e-02
   9.3440000e-02
  -2.5580000e-02
  -8.9380000e-02
   3.2490000e-02
   1.5400000e-03
   3.0700000e-03
  -5.2200000e-02
   1.6940000e-02
   1.2480000e-02
  -4.5190000e-02
  -1.8100000e-02
  -4.4550000e-02
   4.6860000e-02
  -2.4210000e-02
   5.4670000e-02
  -7.2100000e-03
  -6.9700000e-02
  -2.4510000e-02
   1.0087000e-01
  -4.3700000e-02
  -7.5900000e-03
  -1.9410000e-02
   6.5260000e-02
   8.2300000e-03
  -6.5830000e-02
  -8.6810000e-02
  -8.9400000e-03
   3.6800000e-02
   1.0450000e-02
  -5.0940000e-02
   5.7900000e-03
   6.0000000e-03
  -5.4480000e-02
  -2.0040000e-02
  -2.0600000e-03
  -6.7720000e-02
  -6.9480000e-02
   1.5971000e-01
  -1.8420000e-02
  -8.0250000e-02
   1.1130000e-02
   4.3650000e-02
   3.3290000e-02
  -4.9020000e-02
  -1.0200000e-02
   5.1380000e-02
  -6.7310000e-02
  -1.1296000e-01
   6.4050000e-02
   6.3420000e-02
  -1.2579000e-01
  -2.2950000e-02
   7.7320000e-02
   5.0070000e-02
  -8.6480000e-02
  -1.9550000e-02
   1.0430000e-01
   4.8750000e-02
  -1.1529000e-01
   1.0753000e-01
   4.1950000e-02
  -1.4874000e-01
  -1.4040000e-02
   5.8590000e-02
   3.5290000e-02
  -7.3540000e-02
   1.6940000e-02
   6.5890000e-02
  -8.5080000e-02
  -3.1230000e-02
   1.2643000e-01
  -5.2400000e-03
  -8.3710000e-02
   1.4861000e-01
   6.6400000e-03
  -1.5680000e-01
  -6.2200000e-03
   7.3150000e-02
   6.6100000e-03
  -4.4030000e-02
   1.3000000e-02
   1.3200000e-03
   6.9100000e-03
  -9.3030000e-02
   5.1820000e-02
  -5.4590000e-02
  -9.7900000e-03
   6.9400000e-02
   3.8000000e-04
  -5.1710000e-02
  -7.5210000e-02
   8.9680000e-02
  -8.7770000e-02
  -3.6690000e-02
   6.5780000e-02
   2.4760000e-02
  -2.9580000e-02
  -4.2990000e-02
   8.6830000e-02
  -1.0550000e-01
  -7.7600000e-03
  -1.0500000e-02
  -5.3270000e-02
   5.5880000e-02
  -5.4590000e-02
   4.3160000e-02
  -1.1380000e-02
  -7.6390000e-02
   1.3331000e-01
  -1.3057000e-01
  -4.6310000e-02
   5.7910000e-02
  -2.4100000e-02
  -3.5700000e-02
   8.3210000e-02
  -1.1990000e-01
   7.7840000e-02
  -7.6660000e-02
   5.9940000e-02
   1.8400000e-03
  -1.0211000e-01
   6.0130000e-02
  -4.0900000e-03
  -1.9030000e-02
  -7.9180000e-02
   6.8300000e-03
   2.5960000e-02
   3.4140000e-02
  -3.9100000e-02
   7.4060000e-02
   3.6380000e-02
  -6.8380000e-02
  -4.5540000e-02
   3.9130000e-02
   3.4740000e-02
  -4.4750000e-02
  -1.2120000e-02
  -5.3740000e-02
   1.1954000e-01
  -6.5690000e-02
  -5.2260000e-02
   1.0764000e-01
  -4.4580000e-02
  -2.9610000e-02
  -7.9950000e-02
   8.8450000e-02
   2.2510000e-02
  -3.2740000e-02
  -4.2960000e-02
   4.4280000e-02
   9.4300000e-03
  -9.0860000e-02
   3.1940000e-02
   2.6100000e-02
  -4.7650000e-02
  -5.3110000e-02
   1.8210000e-02
   9.8070000e-02
  -1.1414000e-01
  -6.0130000e-02
   7.8360000e-02
  -8.3630000e-02
  -7.8100000e-03
   7.0880000e-02
   1.7710000e-02
  -2.8050000e-02
   5.2200000e-02
   7.2410000e-02
  -8.2530000e-02
  -6.3300000e-03
   1.0419000e-01
  -1.5980000e-02
  -1.3991000e-01
   5.5700000e-03
   1.5380000e-02
  -7.3370000e-02
  -3.5480000e-02
   7.4550000e-02
  -1.0040000e-02
  -2.6070000e-02
  -1.6730000e-02
  -9.9300000e-03
  -7.3400000e-02
   8.6100000e-03
   2.1330000e-02
  -8.3980000e-02
   3.3670000e-02
   2.1000000e-02
   1.1520000e-02
  -4.9050000e-02
   3.2790000e-02
   8.5300000e-03
  -2.1770000e-02
  -1.8120000e-02
   2.3470000e-02
  -3.4490000e-02
   9.5700000e-03
   3.5310000e-02
  -2.2870000e-02
  -1.7030000e-02
   4.4120000e-02
  -8.0100000e-03
   1.1190000e-02
   2.9940000e-02
  -6.6600000e-03
   9.3500000e-03
  -1.1930000e-02
   3.9920000e-02
   4.8060000e-02
  -1.1650000e-01
  -2.7120000e-02
   8.7710000e-02
  -9.9450000e-02
  -1.6456000e-01
   8.4560000e-02
   5.8700000e-03
  -8.6670000e-02
   8.5000000e-03
   5.5100000e-03
  -1.7300000e-02
   1.2040000e-02
   5.9390000e-02
   8.8000000e-03
  -8.3020000e-02
   1.7410000e-02
  -8.8600000e-03
   9.3800000e-03
   2.1220000e-02
  -2.9040000e-02
   1.2094000e-01
  -5.8100000e-02
  -1.4800000e-03
   7.2360000e-02
  -4.4610000e-02
  -4.2830000e-02
  -9.6200000e-03
   7.1750000e-02
  -2.5010000e-02
  -6.7200000e-02
   3.8440000e-02
  -3.8850000e-02
  -3.4960000e-02
   3.5230000e-02
   1.8560000e-02
   3.0740000e-02
  -1.0690000e-02
   4.3290000e-02
   2.0510000e-02
  -6.5860000e-02
  -5.9550000e-02
   4.3490000e-02
  -3.5900000e-03
  -9.3110000e-02
   7.3800000e-03
   4.5600000e-02
  -1.6340000e-02
  -1.1211000e-01
   6.3770000e-02
   1.2922000e-01
  -1.3007000e-01
  -8.3790000e-02
   3.2980000e-02
   9.0500000e-03
  -9.6020000e-02
  -9.4600000e-03
   6.5750000e-02
  -3.6050000e-02
  -2.2100000e-02
   4.3870000e-02
  -5.1800000e-03
  -9.8350000e-02
   1.1430000e-02
   1.0893000e-01
   1.2830000e-02
  -3.8000000e-02
  -1.1458000e-01
   5.7930000e-02
  -1.5460000e-02
  -6.6270000e-02
  -5.4530000e-02
  -1.8100000e-03
  -3.0210000e-02
  -1.4500000e-03
  -2.2730000e-02
  -4.9220000e-02
   6.8500000e-03
   6.2460000e-02
  -9.3500000e-03
  -1.6560000e-02
   1.1447000e-01
   2.1190000e-02
  -7.6090000e-02
   3.1310000e-02
   9.3000000e-04
   3.5310000e-02
   2.1550000e-02
  -1.5440000e-02
   7.0500000e-03
  -1.1930000e-02
   4.2440000e-02
  -7.5730000e-02
   6.7200000e-02
   8.5800000e-03
  -7.8330000e-02
   7.2470000e-02
   3.4900000e-02
  -4.6720000e-02
  -4.6670000e-02
   1.2010000e-02
  -3.8220000e-02
  -4.7570000e-02
   7.5900000e-03
  -1.2884000e-01
   3.3000000e-04
   9.6130000e-02
  -1.0712000e-01
  -2.4320000e-02
   3.8470000e-02
   4.0190000e-02
  -5.3880000e-02
  -4.6830000e-02
   9.3470000e-02
   2.5060000e-02
  -6.4730000e-02
  -4.5100000e-02
   2.7090000e-02
   5.8810000e-02
  -1.5550000e-02
  -9.6200000e-03
   2.1410000e-02
  -7.8700000e-03
  -9.9250000e-02
   4.8890000e-02
   2.6540000e-02
  -2.4180000e-02
  -4.9220000e-02
  -8.5870000e-02
   5.3190000e-02
  -4.8390000e-02
  -1.2100000e-03
   6.3690000e-02
   4.5430000e-02
  -2.0303000e-01
   1.3627000e-01
   5.4640000e-02
  -1.1762000e-01
   1.6150000e-02
   1.3638000e-01
  -6.6520000e-02
  -1.1990000e-01
   1.3991000e-01
  -2.3000000e-02
  -6.9890000e-02
  -3.9040000e-02
   2.1170000e-02
  -1.1080000e-02
   1.2340000e-02
  -7.1860000e-02
   5.9030000e-02
   2.9670000e-02
  -1.0030000e-01
   9.0000000e-04
   4.7840000e-02
  -4.8060000e-02
  -8.0600000e-03
  -4.4530000e-02
   5.0390000e-02
  -3.2330000e-02
  -2.9280000e-02
  -3.5010000e-02
   5.9310000e-02
   6.2020000e-02
  -1.2760000e-01
   5.2510000e-02
   8.7080000e-02
  -6.9010000e-02
  -9.0000000e-04
   4.6310000e-02
  -1.8230000e-02
  -1.1598000e-01
   2.6900000e-03
   8.6750000e-02
  -5.5490000e-02
  -1.0279000e-01
   8.6150000e-02
   4.9630000e-02
  -8.1190000e-02
  -5.6120000e-02
   8.4480000e-02
  -2.8540000e-02
  -4.5510000e-02
   1.5400000e-03
   2.1800000e-02
   4.7200000e-03
  -9.1300000e-03
   8.0120000e-02
  -4.7930000e-02
  -4.0190000e-02
   8.0140000e-02
   6.0920000e-02
  -1.1192000e-01
  -4.1460000e-02
   9.2230000e-02
   2.1330000e-02
  -1.1200000e-01
  -3.6250000e-02
   1.0208000e-01
  -4.8580000e-02
  -1.3575000e-01
   5.7550000e-02
   9.2700000e-02
  -1.0603000e-01
  -4.4470000e-02
   1.0888000e-01
   6.1700000e-03
  -1.0899000e-01
   5.0670000e-02
  -3.4550000e-02
   1.7710000e-02
  -2.5000000e-04
  -8.1820000e-02
   9.3410000e-02
   3.6160000e-02
  -1.0243000e-01
   1.7440000e-02
   7.1120000e-02
  -5.8840000e-02
  -1.2120000e-02
  -1.2530000e-02
   2.4840000e-02
  -4.4230000e-02
   3.8770000e-02
   3.4410000e-02
  -1.1379000e-01
   1.1644000e-01
  -4.3130000e-02
  -8.0530000e-02
   4.0960000e-02
  -1.2860000e-02
   2.9690000e-02
   1.5660000e-02
  -7.5840000e-02
  -2.1300000e-02
   4.9460000e-02
   2.1660000e-02
   2.2040000e-02
  -7.1450000e-02
   9.2120000e-02
   4.3160000e-02
  -4.5160000e-02
  -3.1060000e-02
   8.8010000e-02
   6.3390000e-02
  -1.5955000e-01
   1.1410000e-02
   4.3590000e-02
  -3.5590000e-02
  -8.9100000e-03
  -5.2340000e-02
   1.7160000e-02
  -9.5400000e-03
  -7.3890000e-02
   4.9100000e-03
   4.9190000e-02
  -6.0050000e-02
  -7.0110000e-02
   5.9420000e-02
   1.1513000e-01
  -9.5000000e-02
  -7.4060000e-02
   3.4270000e-02
   1.4792000e-01
  -1.2149000e-01
  -2.6900000e-03
   9.8680000e-02
  -1.8860000e-02
  -8.0940000e-02
   2.0370000e-02
   3.1450000e-02
  -9.5880000e-02
  -9.2870000e-02
   1.0093000e-01
  -6.4600000e-02
  -1.6810000e-02
  -1.6290000e-02
  -2.9640000e-02
   1.1240000e-02
  -5.5550000e-02
   1.2780000e-02
   2.2700000e-02
   1.3270000e-02
  -9.5630000e-02
   9.2260000e-02
   8.2280000e-02
  -9.0180000e-02
  -1.6510000e-02
   7.7760000e-02
   9.0730000e-02
  -2.1663000e-01
   4.1700000e-03
   1.4452000e-01
  -1.2031000e-01
  -1.3092000e-01
   2.4287000e-01
  -1.9490000e-02
  -8.8090000e-02
   7.6580000e-02
   8.6230000e-02
  -4.8610000e-02
  -9.3110000e-02
   7.8090000e-02
  -1.5790000e-02
  -3.1150000e-02
  -8.7700000e-03
   2.0340000e-02
  -4.7520000e-02
  -9.3300000e-02
   2.3720000e-02
  -3.7210000e-02
   6.4350000e-02
  -1.0140000e-02
   2.0920000e-02
   2.9720000e-02
  -1.3416000e-01
   1.9030000e-02
   9.3800000e-03
  -6.9290000e-02
  -4.7950000e-02
   9.1300000e-03
   5.0260000e-02
  -1.2720000e-02
  -6.7670000e-02
   7.3320000e-02
   5.0340000e-02
  -7.1370000e-02
   4.8670000e-02
   5.9520000e-02
   1.8890000e-02
  -9.2180000e-02
   8.0420000e-02
   1.0995000e-01
  -7.4910000e-02
   1.2170000e-02
   4.5130000e-02
   2.3690000e-02
  -4.6310000e-02
  -1.5710000e-02
  -3.0000000e-05
  -3.6300000e-02
   4.5200000e-03
   4.8300000e-03
   5.4640000e-02
  -5.3600000e-02
  -6.9150000e-02
   4.3790000e-02
  -6.4840000e-02
   1.7710000e-02
  -2.6840000e-02
  -5.5190000e-02
  -2.4700000e-02
   9.2120000e-02
   5.4890000e-02
  -1.6086000e-01
   5.2890000e-02
   6.4540000e-02
  -3.3370000e-02
  -1.5066000e-01
   7.7840000e-02
   8.0090000e-02
  -6.7750000e-02
  -7.4000000e-04
   9.6270000e-02
  -6.4430000e-02
  -4.9630000e-02
  -2.2840000e-02
   4.9870000e-02
  -2.2370000e-02
   4.4000000e-04
   1.1210000e-02
  -5.5990000e-02
   3.2190000e-02
  -5.7470000e-02
   2.2670000e-02
  -1.8040000e-02
  -6.6410000e-02
  -1.1490000e-02
   8.3050000e-02
  -6.1830000e-02
  -2.1280000e-02
  -4.2800000e-03
  -1.2720000e-02
  -6.1090000e-02
   6.3720000e-02
   1.7680000e-02
  -9.9200000e-02
   4.6830000e-02
   7.4140000e-02
  -2.7200000e-02
  -5.6760000e-02
   5.7600000e-03
   5.5400000e-03
  -6.3560000e-02
  -1.1411000e-01
   9.6870000e-02
   6.3500000e-02
  -1.2867000e-01
   7.0880000e-02
   1.9580000e-02
   3.7840000e-02
  -4.6360000e-02
  -1.2900000e-03
   8.1350000e-02
   4.9630000e-02
  -6.1690000e-02
  -5.5300000e-02
   8.6420000e-02
  -1.2970000e-02
  -1.2963000e-01
  -2.8500000e-03
   7.9800000e-03
  -2.1910000e-02
  -7.4000000e-03
  -1.5410000e-02
  -3.4600000e-02
  -9.9300000e-03
   1.0340000e-02
  -2.5610000e-02
  -3.9320000e-02
   7.9460000e-02
  -1.4800000e-03
  -8.7700000e-03
   2.7060000e-02
  -9.0450000e-02
  -1.9000000e-02
   2.7450000e-02
  -3.0490000e-02
  -1.7220000e-02
   5.9030000e-02
  -1.6860000e-02
  -8.2500000e-03
  -1.0140000e-02
   1.2750000e-02
  -1.7470000e-02
  -5.6510000e-02
   5.1660000e-02
   6.8300000e-02
  -4.7900000e-02
   4.1350000e-02
  -6.0900000e-03
   2.6710000e-02
  -1.9380000e-02
   1.8560000e-02
  -5.4600000e-03
  -2.5120000e-02
  -7.9200000e-03
   8.7000000e-02
  -1.5850000e-02
  -1.4847000e-01
   7.5130000e-02
   6.8220000e-02
  -6.8220000e-02
   9.0000000e-04
   4.7160000e-02
   6.3300000e-03
  -6.9970000e-02
  -1.6200000e-03
   5.3140000e-02
  -6.5890000e-02
  -4.9600000e-02
   1.1198000e-01
  -1.3405000e-01
  -6.2570000e-02
   2.6900000e-03
  -1.7190000e-02
   7.7950000e-02
  -1.4340000e-02
  -5.1220000e-02
   5.1190000e-02
   3.0820000e-02
  -4.2140000e-02
   3.0740000e-02
   2.3940000e-02
  -3.5640000e-02
   3.0200000e-03
   4.7490000e-02
  -3.0850000e-02
  -8.1980000e-02
   1.8150000e-02
   4.6200000e-02
  -4.8610000e-02
  -8.7500000e-03
   3.4000000e-03
  -1.9030000e-02
   7.7290000e-02
  -2.8460000e-02
   3.7000000e-03
   2.2570000e-02
  -6.5580000e-02
   7.2190000e-02
  -6.0900000e-03
  -3.2790000e-02
   8.2830000e-02
  -2.4270000e-02
  -6.9500000e-02
   7.9200000e-03
   3.8960000e-02
  -2.3850000e-02
  -1.0630000e-01
   4.6500000e-02
   2.5000000e-04
  -9.3770000e-02
   5.5740000e-02
  -4.0610000e-02
   9.3910000e-02
  -1.3980000e-02
  -9.1440000e-02
   1.3054000e-01
   9.5000000e-02
  -6.9890000e-02
  -7.1700000e-02
   3.7180000e-02
   5.4560000e-02
  -8.0310000e-02
  -1.3790000e-02
   4.9710000e-02
  -4.9600000e-03
  -2.1820000e-02
  -6.0400000e-02
   1.1088000e-01
  -1.0090000e-01
  -4.0360000e-02
   9.9500000e-02
  -7.8740000e-02
  -4.9630000e-02
   8.0000000e-04
   7.2580000e-02
  -8.2250000e-02
  -7.9020000e-02
   5.0830000e-02
   1.1160000e-02
  -1.0737000e-01
   5.3680000e-02
   9.1220000e-02
   2.9900000e-03
  -1.4828000e-01
   7.2250000e-02
   6.2620000e-02
  -9.2590000e-02
  -1.4810000e-02
  -5.2600000e-03
   2.5330000e-02
  -8.3870000e-02
  -1.3570000e-02
   1.1971000e-01
   6.6400000e-03
  -8.4800000e-02
   2.3630000e-02
   1.9974000e-01
  -1.3191000e-01
  -9.6760000e-02
   8.4060000e-02
  -4.5320000e-02
  -1.6230000e-02
  -1.2300000e-03
   4.6580000e-02
  -4.3570000e-02
  -9.8200000e-03
  -1.9990000e-02
   3.4790000e-02
  -3.2710000e-02
  -8.5960000e-02
  -3.3090000e-02
   7.5430000e-02
  -1.0500000e-02
  -1.0378000e-01
   5.3220000e-02
   6.3360000e-02
  -8.2530000e-02
  -4.5500000e-03
   1.3000000e-02
  -6.6100000e-03
   2.9060000e-02
   3.8400000e-03
   3.3340000e-02
   4.1920000e-02
  -1.0780000e-02
  -6.3000000e-04
  -5.6620000e-02
   1.8970000e-02
   1.8260000e-02
  -7.2110000e-02
  -1.0400000e-03
  -3.5100000e-03
  -1.9000000e-02
   4.6360000e-02
  -5.7030000e-02
   1.3200000e-03
   2.5500000e-03
   5.0000000e-05
   5.7740000e-02
   1.7360000e-02
   8.9400000e-03
  -5.6340000e-02
   4.9220000e-02
  -2.4100000e-03
  -7.7000000e-04
   2.7830000e-02
  -8.4400000e-03
  -7.6000000e-02
   3.3480000e-02
  -2.8100000e-02
  -1.7030000e-02
  -3.7010000e-02
  -1.4940000e-02
   2.7310000e-02
  -8.4280000e-02
  -4.5200000e-03
   6.0300000e-03
   2.0800000e-03
  -9.7300000e-03
  -6.2800000e-03
   1.2530000e-02
  -3.7670000e-02
   1.5240000e-02
   1.0296000e-01
  -1.6180000e-02
   1.3400000e-03
  -3.2660000e-02
  -2.3910000e-02
  -2.7360000e-02
   5.5060000e-02
  -2.0840000e-02
   1.2690000e-02
   4.9350000e-02
  -1.6010000e-02
   1.1630000e-02
   2.9340000e-02
  -2.4480000e-02
  -6.4820000e-02
   1.2300000e-03
  -6.7310000e-02
   3.1310000e-02
  -2.1060000e-02
  -9.1170000e-02
   7.4360000e-02
   2.6620000e-02
  -1.8420000e-02
  -4.5730000e-02
   5.9990000e-02
  -6.3560000e-02
  -1.1900000e-02
  -1.7300000e-03
  -3.7430000e-02
   1.1000000e-03
  -5.7930000e-02
  -1.7250000e-02
   7.8700000e-03
   1.2940000e-02
  -3.2410000e-02
  -1.7850000e-02
   1.0896000e-01
  -3.2410000e-02
  -1.7030000e-02
   4.4340000e-02
  -1.9140000e-02
  -3.2870000e-02
  -6.0540000e-02
   3.2050000e-02
   1.2600000e-03
  -5.5930000e-02
   1.2368000e-01
   2.3740000e-02
  -9.5910000e-02
   5.5820000e-02
   4.2140000e-02
  -1.0860000e-02
  -7.7040000e-02
   5.4620000e-02
   3.1610000e-02
  -1.0487000e-01
   3.9560000e-02
   7.1450000e-02
  -5.4370000e-02
  -1.0611000e-01
   6.4820000e-02
   1.2185000e-01
  -5.9500000e-02
  -6.6900000e-02
   5.5270000e-02
   5.4530000e-02
  -1.5283000e-01
  -4.5820000e-02
   3.6220000e-02
  -8.1870000e-02
  -8.2230000e-02
  -6.7200000e-03
  -3.2020000e-02
   1.7630000e-02
  -3.2000000e-02
   3.9350000e-02
   6.3170000e-02
  -1.1160000e-02
   1.9520000e-02
   6.0900000e-02
  -4.1210000e-02
  -9.2400000e-02
   8.5460000e-02
   3.9290000e-02
  -1.1878000e-01
   3.5010000e-02
   6.3450000e-02
  -1.2340000e-02
  -6.3600000e-03
   5.5740000e-02
   1.0310000e-02
  -5.2700000e-02
  -1.9140000e-02
   2.2890000e-02
  -4.4000000e-04
  -6.8220000e-02
   1.1160000e-02
   9.4290000e-02
  -2.1900000e-03
  -9.7640000e-02
   9.7090000e-02
  -3.5600000e-03
  -4.3900000e-02
  -1.0120000e-02
   1.9710000e-02
  -5.3470000e-02
   3.6700000e-03
   3.5290000e-02
  -5.0780000e-02
   2.5120000e-02
  -1.1875000e-01
  -2.5550000e-02
   2.3250000e-02
  -3.0160000e-02
   5.4620000e-02
   2.4130000e-02
  -3.0960000e-02
   4.1730000e-02
  -1.4010000e-02
   1.7550000e-02
  -8.5190000e-02
   3.0740000e-02
   2.6130000e-02
  -1.0115000e-01
   8.1050000e-02
   1.0655000e-01
   3.5950000e-02
  -1.1727000e-01
   1.4510000e-01
   7.0220000e-02
  -1.0699000e-01
  -1.6830000e-02
   3.3010000e-02
  -8.3400000e-03
  -4.5730000e-02
   5.0260000e-02
  -2.8730000e-02
  -1.7600000e-02
   5.0810000e-02
  -1.2456000e-01
  -9.7300000e-03
  -1.1930000e-02
   1.3190000e-02
  -1.2481000e-01
   3.9020000e-02
   1.0945000e-01
  -1.2939000e-01
  -2.8870000e-02
   1.2481000e-01
   5.3410000e-02
  -1.1579000e-01
  -6.5720000e-02
   1.5637000e-01
  -8.4480000e-02
  -6.3660000e-02
   9.3390000e-02
  -2.9690000e-02
   7.4990000e-02
  -6.2800000e-03
  -7.1600000e-03
   3.9370000e-02
  -2.4950000e-02
   6.2800000e-03
   3.7480000e-02
  -1.1135000e-01
   2.3600000e-03
   5.6730000e-02
   1.9000000e-04
  -2.6920000e-02
  -2.9780000e-02
   1.4590000e-02
   3.7750000e-02
  -1.6180000e-02
  -2.8200000e-03
  -4.5000000e-03
  -6.8330000e-02
  -3.6990000e-02
   1.4200000e-02
  -7.2220000e-02
  -1.3630000e-02
   9.9500000e-03
  -1.6450000e-02
  -1.8070000e-02
  -1.3270000e-02
   4.2250000e-02
  -6.5000000e-03
   5.4860000e-02
  -1.1020000e-02
   8.6600000e-03
   2.8820000e-02
  -1.1200000e-03
   4.3810000e-02
  -3.8520000e-02
   3.8550000e-02
   7.2160000e-02
  -2.9100000e-03
  -4.6910000e-02
  -5.1660000e-02
   5.2530000e-02
   1.3240000e-02
  -7.8910000e-02
   3.3200000e-03
   1.9060000e-02
  -3.1150000e-02
  -8.2750000e-02
   1.2544000e-01
   3.4250000e-02
  -1.0874000e-01
  -6.7860000e-02
   8.7240000e-02
   1.7410000e-02
  -1.2346000e-01
   1.3057000e-01
  -7.2400000e-03
  -1.9969000e-01
   7.2520000e-02
  -6.3000000e-04
  -5.4620000e-02
   3.2930000e-02
   3.1390000e-02
  -6.5450000e-02
   1.0567000e-01
   4.5160000e-02
  -6.3860000e-02
  -7.6060000e-02
   7.3950000e-02
  -3.0210000e-02
  -4.6310000e-02
   1.8590000e-02
  -7.8910000e-02
   3.9070000e-02
  -1.4450000e-02
   3.6360000e-02
  -6.0600000e-03
  -8.1870000e-02
  -1.5550000e-02
   7.7900000e-03
  -1.1350000e-02
  -1.0120000e-02
  -8.2090000e-02
   3.6160000e-02
  -1.9850000e-02
  -4.3700000e-02
   4.5930000e-02
  -1.3160000e-02
  -3.4160000e-02
  -2.6210000e-02
   7.5400000e-03
   2.1800000e-02
  -4.9650000e-02
  -3.4550000e-02
   1.2830000e-02
  -6.7890000e-02
  -1.2830000e-02
   5.0590000e-02
   7.2600000e-02
  -4.2280000e-02
   2.7390000e-02
   1.5220000e-02
  -1.8890000e-02
  -3.6470000e-02
  -5.2830000e-02
   5.3360000e-02
   2.8820000e-02
  -1.2113000e-01
   4.4880000e-02
   3.0600000e-02
  -3.0760000e-02
  -1.6920000e-02
   6.0270000e-02
   5.3710000e-02
  -8.3650000e-02
   1.3330000e-02
   7.0850000e-02
  -7.2880000e-02
  -7.3970000e-02
  -2.1700000e-03
  -6.2050000e-02
  -2.2150000e-02
   3.5530000e-02
  -1.2908000e-01
   6.0700000e-02
   2.3550000e-02
  -5.9720000e-02
  -2.6650000e-02
  -8.8300000e-03
   8.3930000e-02
  -5.8980000e-02
  -1.7790000e-02
   3.1090000e-02
   3.8080000e-02
  -3.3070000e-02
   1.0530000e-02
   2.3900000e-03
   1.2670000e-02
   7.1730000e-02
  -8.9050000e-02
   9.3800000e-02
  -8.6780000e-02
   3.6630000e-02
   4.4060000e-02
  -6.5090000e-02
   2.8350000e-02
  -2.6050000e-02
   1.9930000e-02
  -3.8190000e-02
  -5.4780000e-02
   9.0180000e-02
  -3.3480000e-02
  -1.1461000e-01
   1.1351000e-01
   5.6480000e-02
  -1.2720000e-02
  -6.3010000e-02
   8.8800000e-03
   6.2020000e-02
  -1.2248000e-01
  -8.8300000e-03
   6.1800000e-02
   5.8290000e-02
  -1.3451000e-01
  -5.1490000e-02
   1.9922000e-01
  -9.3390000e-02
  -6.9450000e-02
   8.8620000e-02
  -9.7900000e-03
  -4.1900000e-03
   2.2980000e-02
  -1.0310000e-02
  -2.6000000e-03
  -8.6260000e-02
   4.0720000e-02
   6.1990000e-02
  -9.5420000e-02
   1.4150000e-02
   7.8530000e-02
   2.6600000e-02
  -9.0860000e-02
   7.8550000e-02
  -2.6840000e-02
  -1.1058000e-01
   6.5310000e-02
  -6.1700000e-03
  -8.6750000e-02
   5.7520000e-02
   6.2510000e-02
   8.7700000e-03
  -1.6230000e-02
  -2.0450000e-02
   1.1160000e-02
   2.7910000e-02
   5.3440000e-02
   1.9000000e-02
  -8.2690000e-02
   8.5500000e-03
   4.6940000e-02
  -7.4190000e-02
   1.4480000e-02
  -3.4880000e-02
   2.8570000e-02
  -4.0850000e-02
  -4.1840000e-02
   5.3220000e-02
  -4.5320000e-02
  -4.0720000e-02
   4.2830000e-02
   4.7570000e-02
  -6.2400000e-02
  -1.5130000e-02
   7.8690000e-02
   5.7770000e-02
   2.1930000e-02
  -1.2060000e-02
   8.8120000e-02
  -2.5960000e-02
  -5.1380000e-02
   4.5020000e-02
   9.6760000e-02
  -8.7680000e-02
   3.1000000e-03
   5.7580000e-02
  -3.3610000e-02
  -4.2580000e-02
  -2.7010000e-02
   6.7420000e-02
  -6.6000000e-02
  -1.1050000e-02
   4.3070000e-02
  -4.9850000e-02
  -4.3950000e-02
  -6.6020000e-02
   4.3950000e-02
   6.8500000e-03
  -7.6990000e-02
   3.3500000e-02
   5.6100000e-02
  -7.6720000e-02
  -2.7140000e-02
   7.3200000e-03
   3.3310000e-02
  -6.0180000e-02
   1.6450000e-02
   2.5000000e-03
   4.9870000e-02
  -6.1310000e-02
   3.8300000e-02
  -6.7750000e-02
  -3.5890000e-02
   1.0296000e-01
  -9.5500000e-02
   5.7250000e-02
  -3.6000000e-04
   5.9800000e-02
  -1.1071000e-01
   6.8300000e-03
   7.4220000e-02
  -5.0120000e-02
  -1.4890000e-02
   6.8300000e-02
   3.1230000e-02
  -1.8780000e-02
  -1.4970000e-02
   1.2090000e-02
   2.5960000e-02
  -1.3273000e-01
   6.5200000e-02
   2.5880000e-02
  -2.9310000e-02
  -5.3850000e-02
   5.7000000e-02
   4.8670000e-02
  -6.2870000e-02
   2.7800000e-02
   5.3710000e-02
   3.2550000e-02
  -6.4430000e-02
   9.2100000e-03
  -3.5640000e-02
  -9.0070000e-02
   5.3220000e-02
   1.0610000e-02
  -2.7450000e-02
  -5.0610000e-02
  -2.9010000e-02
   1.2143000e-01
  -6.9010000e-02
  -4.9540000e-02
   1.4655000e-01
  -1.1562000e-01
   8.3380000e-02
  -1.0470000e-02
  -2.3250000e-02
   4.8720000e-02
  -3.8660000e-02
   4.3620000e-02
  -6.9900000e-03
   1.6780000e-02
   1.0470000e-02
  -7.3700000e-02
  -7.0380000e-02
  -1.9110000e-02
  -5.2000000e-04
  -2.2020000e-02
   6.1860000e-02
  -4.8890000e-02
   2.8350000e-02
  -4.3070000e-02
   4.7400000e-03
   1.6920000e-02
   9.1600000e-03
   4.2580000e-02
   1.2530000e-02
   1.0208000e-01
  -3.9450000e-02
  -8.1700000e-03
   4.7820000e-02
   8.7680000e-02
  -6.9180000e-02
  -6.4900000e-02
   6.7640000e-02
  -1.3820000e-02
  -9.5470000e-02
   3.2660000e-02
   8.8000000e-04
  -3.8580000e-02
   6.0600000e-03
   5.4590000e-02
  -9.6020000e-02
  -1.0068000e-01
   2.2260000e-02
   1.3760000e-02
  -2.8000000e-03
  -1.0476000e-01
   5.3300000e-02
   5.7630000e-02
  -7.6500000e-02
  -4.3680000e-02
   6.6600000e-02
   4.3020000e-02
  -1.2876000e-01
   8.7710000e-02
   4.1070000e-02
  -3.8440000e-02
   2.7360000e-02
   6.0840000e-02
   2.5940000e-02
  -1.2340000e-02
   3.6000000e-04
  -5.0670000e-02
   5.4290000e-02
  -4.2090000e-02
   2.0370000e-02
  -4.2580000e-02
  -3.7070000e-02
   2.5880000e-02
  -2.4810000e-02
  -4.2770000e-02
  -9.6800000e-03
   4.7570000e-02
  -4.8450000e-02
  -1.5490000e-02
   1.0238000e-01
   3.6360000e-02
  -1.1252000e-01
   3.4160000e-02
   5.4970000e-02
  -8.0580000e-02
   2.5140000e-02
   4.3920000e-02
  -3.3940000e-02
  -1.1321000e-01
   7.9490000e-02
   7.6200000e-02
  -1.4008000e-01
   6.3970000e-02
   1.9000000e-02
  -5.5140000e-02
  -6.2100000e-02
   1.2489000e-01
  -3.9590000e-02
  -7.5180000e-02
   3.4460000e-02
  -1.6200000e-03
   8.0000000e-05
  -4.8690000e-02
   2.3770000e-02
  -7.0570000e-02
   2.0430000e-02
  -6.8500000e-03
  -1.2182000e-01
   7.1950000e-02
  -5.3490000e-02
  -1.1460000e-02
   1.7440000e-02
   8.1400000e-03
   4.1900000e-03
  -7.1000000e-04
  -1.4670000e-02
  -3.3290000e-02
   1.1998000e-01
  -1.1500000e-03
   2.2510000e-02
   3.4900000e-02
  -1.6970000e-02
   3.5510000e-02
  -3.5480000e-02
  -4.9540000e-02
   1.9820000e-02
   1.5600000e-02
  -5.1080000e-02
   3.1530000e-02
  -2.2670000e-02
  -3.2660000e-02
   6.5560000e-02
   3.1970000e-02
  -9.6540000e-02
   3.2350000e-02
  -4.5270000e-02
  -7.3780000e-02
   2.8570000e-02
  -1.1705000e-01
  -8.2000000e-04
   5.2400000e-02
  -4.4030000e-02
   6.6680000e-02
   2.6980000e-02
  -7.9020000e-02
  -1.2610000e-02
   2.7750000e-02
  -2.5910000e-02
  -1.7050000e-02
   5.3330000e-02
  -2.9120000e-02
  -4.2910000e-02
   2.6570000e-02
   6.9480000e-02
  -8.1130000e-02
  -5.2370000e-02
   8.6180000e-02
   1.1710000e-02
   3.1800000e-03
   1.4810000e-02
   2.1470000e-02
   2.6400000e-02
   1.4640000e-02
  -4.9900000e-03
  -5.6500000e-03
   9.4600000e-03
  -4.2800000e-02
  -9.0230000e-02
   5.3270000e-02
  -4.8800000e-02
  -6.9500000e-02
   1.6920000e-02
   3.2160000e-02
  -4.0770000e-02
  -8.3400000e-03
  -2.0870000e-02
   9.1250000e-02
   4.1620000e-02
   4.8500000e-03
  -3.3700000e-02
   3.0320000e-02
  -3.5780000e-02
   4.0170000e-02
  -6.6930000e-02
   2.2800000e-03
   9.1300000e-02
  -8.0030000e-02
  -1.7880000e-02
   8.4260000e-02
   3.1800000e-03
  -5.1410000e-02
  -5.7440000e-02
   1.7110000e-02
   4.1700000e-02
  -6.9560000e-02
   1.0910000e-02
   5.8510000e-02
   2.0340000e-02
  -5.8460000e-02
   4.8300000e-03
  -5.9770000e-02
  -6.5040000e-02
  -1.3790000e-02
   1.5600000e-02
   1.2720000e-02
  -1.4586000e-01
  -2.1720000e-02
   8.0060000e-02
  -3.8600000e-02
  -6.7150000e-02
   3.4000000e-03
   1.0021000e-01
  -6.6650000e-02
   4.8640000e-02
   7.8420000e-02
  -5.7580000e-02
   8.4940000e-02
   2.6430000e-02
  -1.0720000e-02
   2.6900000e-03
  -2.5910000e-02
   1.2940000e-02
  -1.2300000e-03
   1.3630000e-02
  -5.6870000e-02
   2.3900000e-03
   3.3040000e-02
  -1.3600000e-02
  -4.6860000e-02
   4.0300000e-03
   9.9000000e-03
  -1.4847000e-01
   4.3870000e-02
   5.5740000e-02
   1.1520000e-02
   6.9810000e-02
   3.8690000e-02
  -4.8800000e-03
  -4.1840000e-02
  -2.3000000e-02
  -2.0400000e-02
  -1.1460000e-02
  -4.8530000e-02
  -3.5900000e-03
   1.8100000e-02
  -3.0110000e-02
  -5.7330000e-02
   1.0038000e-01
  -1.2750000e-02
  -7.2080000e-02
   2.8980000e-02
   1.6510000e-02
  -1.2910000e-02
  -5.6210000e-02
   2.6920000e-02
   1.6180000e-02
  -3.2000000e-02
   7.4280000e-02
  -3.3590000e-02
   2.1700000e-03
   3.0160000e-02
  -1.2717000e-01
  -1.1800000e-03
   5.2810000e-02
  -2.1820000e-02
   2.8050000e-02
  -6.6300000e-02
   2.3900000e-03
   5.3250000e-02
   1.2780000e-02
  -1.3479000e-01
   1.4530000e-02
   6.7970000e-02
  -1.3020000e-02
  -3.0210000e-02
   8.5490000e-02
  -7.8110000e-02
  -1.9190000e-02
   1.2579000e-01
  -4.3650000e-02
  -6.1960000e-02
  -4.7680000e-02
   5.9990000e-02
   2.4840000e-02
  -6.4490000e-02
  -7.3620000e-02
   9.2890000e-02
  -2.2210000e-02
  -1.5705000e-01
   8.9190000e-02
   6.0240000e-02
  -2.0810000e-02
  -1.9140000e-02
   6.3690000e-02
   5.8040000e-02
  -2.7390000e-02
  -6.5580000e-02
   6.2840000e-02
   6.9900000e-03
  -7.7020000e-02
  -1.2040000e-02
   9.5030000e-02
   3.3040000e-02
  -9.8790000e-02
   1.0712000e-01
   6.1910000e-02
  -6.9260000e-02
  -1.4150000e-02
  -2.6510000e-02
  -3.7950000e-02
   1.2580000e-02
  -8.0030000e-02
   6.3940000e-02
  -5.5960000e-02
  -6.0070000e-02
   9.1140000e-02
   6.1880000e-02
  -8.2990000e-02
   9.2400000e-03
   6.7910000e-02
  -5.2670000e-02
   3.7300000e-03
  -3.3890000e-02
  -2.6050000e-02
  -1.2670000e-02
   2.4700000e-02
  -1.2300000e-03
  -4.9820000e-02
   8.9030000e-02
  -3.7600000e-03
  -1.0970000e-02
  -6.5500000e-03
   3.2110000e-02
  -1.6530000e-02
  -2.7390000e-02
   4.8060000e-02
   7.3510000e-02
  -7.6830000e-02
  -8.3130000e-02
   1.0715000e-01
  -1.6500000e-03
  -6.1170000e-02
  -3.3610000e-02
   1.7850000e-02
   1.8670000e-02
  -6.3750000e-02
  -6.4980000e-02
  -7.6800000e-03
   3.4660000e-02
   3.4190000e-02
  -4.2200000e-03
  -1.0060000e-02
  -2.2150000e-02
   1.4890000e-02
   1.0470000e-02
  -3.7430000e-02
   5.4810000e-02
   2.1930000e-02
  -6.3610000e-02
   5.2100000e-03
  -1.0890000e-02
  -5.3410000e-02
   2.2670000e-02
  -3.7290000e-02
  -2.2210000e-02
   4.4100000e-03
   2.7090000e-02
  -5.1520000e-02
   4.5510000e-02
   5.6100000e-02
  -8.7850000e-02
   4.2250000e-02
   1.8510000e-02
   3.5480000e-02
   2.7580000e-02
  -5.1550000e-02
   1.9690000e-02
  -1.9440000e-02
   2.7610000e-02
  -1.1247000e-01
   1.3130000e-02
   6.1400000e-03
  -2.0000000e-03
  -2.5200000e-03
  -4.2280000e-02
   7.4170000e-02
  -3.5010000e-02
  -3.9540000e-02
   4.6860000e-02
  -2.5580000e-02
   7.7600000e-03
   2.5330000e-02
  -7.4190000e-02
   3.2980000e-02
   7.0500000e-03
   5.5990000e-02
  -3.9980000e-02
  -3.6160000e-02
   7.2360000e-02
  -6.2130000e-02
   4.1680000e-02
   3.4680000e-02
  -6.3120000e-02
   8.5500000e-03
  -7.7600000e-03
   7.9290000e-02
  -8.7460000e-02
   1.6090000e-02
   3.1310000e-02
   3.6110000e-02
  -2.9940000e-02
  -3.9800000e-03
   6.9180000e-02
  -8.3430000e-02
  -2.4130000e-02
  -9.5700000e-03
  -1.0298000e-01
   3.5400000e-03
  -4.3300000e-03
  -5.3160000e-02
   1.0310000e-02
  -7.8800000e-02
   1.6640000e-02
   8.5130000e-02
  -1.0583000e-01
  -1.6560000e-02
   8.3490000e-02
  -2.8730000e-02
   1.1900000e-02
  -3.4900000e-02
   4.9410000e-02
  -1.3930000e-02
  -8.1200000e-03
  -3.8910000e-02
   2.5860000e-02
   4.4470000e-02
  -7.1920000e-02
   3.1370000e-02
   3.3860000e-02
   1.0200000e-02
  -5.8900000e-03
  -8.5680000e-02
   1.0301000e-01
  -1.4860000e-02
  -3.1260000e-02
   4.0740000e-02
  -5.3410000e-02
   8.0000000e-04
   7.0030000e-02
   2.3000000e-03
  -3.3370000e-02
   3.2350000e-02
  -1.5630000e-02
   6.6400000e-03
   2.2760000e-02
  -3.9480000e-02
   4.4700000e-03
  -3.7510000e-02
   9.1900000e-03
  -8.0000000e-04
  -3.7070000e-02
  -5.5400000e-03
  -6.1400000e-03
  -7.5510000e-02
   9.0700000e-02
   1.7050000e-02
   3.2600000e-03
   2.8800000e-03
  -4.1680000e-02
   8.7200000e-03
   3.5100000e-03
  -2.5640000e-02
  -5.8650000e-02
   1.6090000e-02
  -1.4970000e-02
   2.4460000e-02
   2.7170000e-02
  -1.8070000e-02
   2.4350000e-02
   6.0400000e-02
  -8.1130000e-02
   7.0030000e-02
   2.1990000e-02
  -4.7950000e-02
   1.8530000e-02
   1.6810000e-02
  -6.1200000e-02
   2.9910000e-02
   7.8880000e-02
  -6.6160000e-02
   2.0340000e-02
  -4.8120000e-02
  -1.9360000e-02
   3.6410000e-02
  -9.0400000e-02
   9.8020000e-02
  -6.9340000e-02
  -3.1010000e-02
   1.2182000e-01
  -1.0178000e-01
  -6.1580000e-02
   8.3100000e-02
   4.3540000e-02
  -1.1074000e-01
   3.3230000e-02
   8.8000000e-03
   7.2700000e-03
  -1.5350000e-02
  -2.9260000e-02
   8.6180000e-02
  -1.2040000e-02
  -1.4940000e-02
  -1.7330000e-02
   6.4820000e-02
  -2.3060000e-02
  -4.1540000e-02
   4.6670000e-02
  -1.4090000e-02
  -1.5669000e-01
   5.1520000e-02
   7.9210000e-02
  -1.1096000e-01
   2.9890000e-02
   4.9570000e-02
   1.6500000e-03
   5.7500000e-02
  -5.2510000e-02
  -6.4510000e-02
   4.2770000e-02
   5.1080000e-02
  -3.7480000e-02
   5.0700000e-03
   2.0890000e-02
  -4.7820000e-02
  -5.7500000e-02
   2.9300000e-03
  -1.4040000e-02
   2.3600000e-03
  -1.4622000e-01
   4.5000000e-03
   1.0619000e-01
  -1.5434000e-01
  -4.2250000e-02
   1.0784000e-01
  -2.8080000e-02
  -2.3280000e-02
   9.8100000e-02
   1.4839000e-01
  -7.8880000e-02
  -2.1770000e-02
   5.0500000e-02
   3.7340000e-02
  -7.2380000e-02
  -8.8290000e-02
  -9.2400000e-03
   4.2530000e-02
  -8.2010000e-02
  -1.8100000e-03
  -2.4430000e-02
  -3.6500000e-03
   4.5000000e-03
   3.3700000e-03
   5.9850000e-02
   2.1110000e-02
   3.4790000e-02
   1.0170000e-02
   6.9900000e-03
   1.7030000e-02
   3.5900000e-03
   3.2930000e-02
  -5.8320000e-02
   4.4060000e-02
  -1.6590000e-02
  -3.7920000e-02
  -3.9450000e-02
  -1.0548000e-01
  -4.0300000e-03
  -4.6310000e-02
  -8.9550000e-02
  -2.8900000e-02
   4.7870000e-02
  -5.8000000e-04
  -1.0685000e-01
   8.7630000e-02
   8.6890000e-02
  -6.1420000e-02
   2.4430000e-02
   1.1520000e-02
   8.6100000e-03
   2.7610000e-02
   1.1900000e-02
  -8.1700000e-03
   5.1380000e-02
   1.4720000e-02
  -4.6450000e-02
   6.4870000e-02
   6.2160000e-02
  -1.2363000e-01
   6.5090000e-02
   1.9470000e-02
  -5.3050000e-02
   6.8050000e-02
  -8.4370000e-02
   2.1910000e-02
  -4.8940000e-02
  -4.2140000e-02
   2.4840000e-02
  -6.2400000e-02
  -5.5990000e-02
   7.1890000e-02
  -8.4560000e-02
  -2.2130000e-02
   7.0930000e-02
  -2.3720000e-02
  -3.0680000e-02
  -7.7430000e-02
   4.9980000e-02
   7.3890000e-02
  -8.4280000e-02
  -4.0280000e-02
   1.1905000e-01
   2.1880000e-02
  -3.9210000e-02
  -2.0620000e-02
   6.0290000e-02
   4.3870000e-02
  -3.5340000e-02
   1.8340000e-02
   2.4700000e-03
   4.6670000e-02
  -6.1330000e-02
   5.2100000e-03
  -1.7080000e-02
  -5.4010000e-02
  -1.3630000e-02
  -2.0210000e-02
   5.1350000e-02
  -2.7530000e-02
  -2.7720000e-02
  -5.4890000e-02
   7.2930000e-02
  -7.6250000e-02
   1.9250000e-02
  -1.1233000e-01
   4.9930000e-02
   1.5710000e-02
  -1.2143000e-01
   2.4050000e-02
   7.5840000e-02
   1.9910000e-02
  -6.8520000e-02
   3.3200000e-02
   5.2600000e-03
   1.1000000e-04
  -3.9730000e-02
   1.2558000e-01
   7.4710000e-02
  -1.2045000e-01
   1.0019000e-01
   4.0170000e-02
   4.6100000e-03
   0.0000000e+00
  -1.4120000e-02
   6.8300000e-03
  -1.2555000e-01
   4.0960000e-02
  -4.2200000e-03
  -8.4120000e-02
   2.9010000e-02
  -1.4800000e-03
  -3.3290000e-02
  -3.7150000e-02
  -4.2800000e-02
   7.3150000e-02
   1.1000000e-03
  -8.4450000e-02
   1.3695000e-01
   2.1740000e-02
  -8.2390000e-02
  -2.4180000e-02
   5.9140000e-02
   6.7640000e-02
  -1.3767000e-01
  -6.3300000e-03
   1.7087000e-01
  -9.6730000e-02
  -1.1732000e-01
   1.5689000e-01
  -1.4260000e-02
  -1.2198000e-01
   1.1025000e-01
   7.9590000e-02
  -2.5690000e-02
  -9.7860000e-02
   5.1880000e-02
  -8.5080000e-02
  -4.2500000e-03
  -1.4120000e-02
  -6.8300000e-02
   3.3970000e-02
  -8.6180000e-02
   1.6120000e-02
   3.2410000e-02
  -4.5430000e-02
   1.2200000e-02
   3.5100000e-02
   5.0180000e-02
  -1.0238000e-01
  -3.9200000e-03
   1.1952000e-01
  -1.2292000e-01
  -1.0200000e-02
   7.3890000e-02
  -1.8120000e-02
  -4.7520000e-02
   1.4860000e-02
   9.1550000e-02
  -8.5710000e-02
  -4.3540000e-02
   5.5470000e-02
  -3.1310000e-02
  -4.4700000e-03
   3.3290000e-02
   7.8310000e-02
  -2.7800000e-02
  -3.4380000e-02
  -5.3200000e-03
  -2.4790000e-02
   1.8120000e-02
   3.1000000e-03
  -4.4750000e-02
   1.0309000e-01
  -1.0038000e-01
  -7.2700000e-03
   3.4160000e-02
  -5.8400000e-02
   4.7130000e-02
   2.1880000e-02
   2.4510000e-02
  -5.4700000e-02
   5.8760000e-02
   1.7190000e-02
  -3.9810000e-02
  -4.2850000e-02
  -1.1350000e-02
  -1.0750000e-02
   3.3230000e-02
   1.3080000e-02
  -1.2810000e-01
   5.7930000e-02
   6.7610000e-02
  -6.4410000e-02
   3.5730000e-02
  -1.2830000e-02
  -6.1720000e-02
   1.3600000e-02
  -2.4540000e-02
   2.0950000e-02
  -2.2840000e-02
   6.9400000e-03
  -3.7700000e-02
  -1.8560000e-02
   6.1990000e-02
  -2.4320000e-02
  -1.5160000e-02
   2.7880000e-02
   1.3682000e-01
  -6.2290000e-02
   3.6500000e-03
   4.5600000e-02
  -5.5110000e-02
  -9.4430000e-02
  -3.6140000e-02
   7.7460000e-02
  -7.2080000e-02
  -2.8490000e-02
   7.3370000e-02
  -5.9520000e-02
   2.0210000e-02
   5.6260000e-02
  -3.4570000e-02
  -4.1680000e-02
  -2.0430000e-02
   7.7210000e-02
  -6.5580000e-02
  -5.5520000e-02
   1.1296000e-01
  -7.7460000e-02
  -8.0060000e-02
   5.2120000e-02
   4.5800000e-03
  -1.0024000e-01
  -2.9150000e-02
   1.4260000e-02
   3.9810000e-02
  -3.4080000e-02
  -2.9900000e-03
   4.3000000e-03
   4.0470000e-02
  -5.8570000e-02
   2.9940000e-02
  -7.0500000e-03
   6.4650000e-02
  -1.8040000e-02
   7.4300000e-02
   2.4700000e-03
   8.6450000e-02
  -3.2600000e-02
  -2.5060000e-02
   1.6290000e-02
   3.5530000e-02
   3.7600000e-03
   8.3100000e-03
  -8.5190000e-02
   1.8840000e-02
   3.2100000e-03
  -3.9620000e-02
   6.1500000e-02
  -1.1270000e-02
  -5.3410000e-02
  -2.8710000e-02
   1.4441000e-01
  -9.6570000e-02
   4.5240000e-02
  -2.2320000e-02
   2.9360000e-02
  -1.2640000e-02
  -9.0290000e-02
   6.4350000e-02
  -8.5930000e-02
   3.7650000e-02
   2.1880000e-02
  -8.5520000e-02
   1.6450000e-02
  -3.1500000e-03
   5.3250000e-02
   4.1290000e-02
  -8.9110000e-02
   2.8790000e-02
  -2.2460000e-02
   3.1500000e-03
  -2.1820000e-02
   0.0000000e+00
  -6.5830000e-02
   6.0070000e-02
   3.4500000e-03
  -1.7300000e-02
  -5.6950000e-02
   2.7420000e-02
   2.2510000e-02
  -1.1634000e-01
   3.3920000e-02
   3.6330000e-02
  -9.4870000e-02
   1.8230000e-02
   1.9000000e-02
   3.6880000e-02
   3.8500000e-02
  -3.1480000e-02
   3.8820000e-02
   9.4600000e-03
  -4.8120000e-02
   7.7890000e-02
  -1.4830000e-02
  -1.1115000e-01
   4.6800000e-02
  -7.0270000e-02
  -1.9200000e-03
  -2.7340000e-02
  -2.1520000e-02
   5.9140000e-02
  -2.6300000e-03
  -1.5850000e-02
   3.8600000e-02
   3.1810000e-02
  -1.2171000e-01
   1.5036000e-01
   3.8800000e-02
  -5.0780000e-02
   2.4020000e-02
   8.0200000e-02
  -1.0112000e-01
  -1.0126000e-01
   1.6860000e-02
  -1.0140000e-02
  -5.6870000e-02
  -3.2380000e-02
   7.9650000e-02
  -1.0104000e-01
   1.2100000e-03
   3.4600000e-02
  -5.0810000e-02
   3.6990000e-02
  -8.6600000e-03
   2.9940000e-02
   4.2550000e-02
  -2.3390000e-02
   7.5100000e-03
   7.6110000e-02
  -2.9800000e-02
   8.8600000e-03
   1.8510000e-02
  -1.0293000e-01
   1.8560000e-02
  -8.3100000e-03
  -3.7810000e-02
  -4.2580000e-02
  -1.8230000e-02
   7.6550000e-02
   1.0120000e-02
   9.9000000e-04
   1.9710000e-02
  -8.3870000e-02
   1.1878000e-01
   5.1300000e-02
  -1.3731000e-01
   6.1530000e-02
   4.7540000e-02
  -7.1970000e-02
  -9.2700000e-03
  -2.0800000e-03
   2.9900000e-03
  -2.1720000e-02
   3.7230000e-02
  -5.0000000e-05
   3.8740000e-02
  -1.3870000e-02
   8.5500000e-03
   3.8060000e-02
  -5.7000000e-02
   6.0270000e-02
  -7.5950000e-02
   2.1700000e-03
  -3.6600000e-02
  -1.3600000e-02
   1.4500000e-03
  -6.3450000e-02
   4.4170000e-02
  -6.0000000e-04
   8.7500000e-03
  -6.9010000e-02
  -1.8810000e-02
  -2.7530000e-02
   5.7030000e-02
  -4.9270000e-02
  -1.0250000e-02
   5.8730000e-02
   3.1310000e-02
  -2.7310000e-02
  -2.8240000e-02
   1.2494000e-01
  -5.5220000e-02
   6.5500000e-03
   4.9930000e-02
   2.4700000e-03
  -4.4470000e-02
  -2.0780000e-02
  -9.1900000e-03
  -4.2800000e-03
  -9.2730000e-02
   2.1820000e-02
   9.1960000e-02
  -3.6690000e-02
   8.5500000e-03
   9.9000000e-03
   9.4400000e-02
  -4.0300000e-02
   6.3000000e-04
  -1.1800000e-03
  -5.7360000e-02
  -3.1390000e-02
  -5.9110000e-02
  -1.9220000e-02
  -5.6260000e-02
  -1.4010000e-02
   3.6900000e-02
  -3.9040000e-02
  -7.1950000e-02
  -1.2090000e-02
  -2.5690000e-02
  -3.1910000e-02
  -5.6020000e-02
  -5.0500000e-02
   3.0570000e-02
  -9.4430000e-02
  -7.4220000e-02
  -4.5650000e-02
  -3.1970000e-02
  -6.6870000e-02
  -4.9130000e-02
  -1.9440000e-02
  -2.8460000e-02
  -4.3790000e-02
  -8.0610000e-02
  -1.9660000e-02
  -7.6830000e-02
   4.9270000e-02
  -9.0780000e-02
  -8.3840000e-02
   8.7000000e-02
  -8.9660000e-02
  -7.4930000e-02
   4.9400000e-03
   3.8800000e-02
  -9.5220000e-02
  -8.4040000e-02
   6.2800000e-03
  -1.1630000e-02
  -4.9490000e-02
  -7.6500000e-02
  -4.3350000e-02
  -6.9310000e-02
  -5.5110000e-02
  -9.7940000e-02
   3.5970000e-02
   2.9940000e-02
  -8.9220000e-02
  -2.5250000e-02
   5.2260000e-02
   3.5310000e-02
  -1.2200000e-02
  -5.1790000e-02
  -5.2000000e-04
   1.5130000e-02
   1.1000000e-04
  -3.7510000e-02
  -6.2050000e-02
   3.0000000e-02
  -5.6540000e-02
  -2.6300000e-03
  -2.2180000e-02
  -4.1870000e-02
   7.5840000e-02
  -5.7470000e-02
  -9.6920000e-02
   1.2752000e-01
  -2.9780000e-02
  -3.8880000e-02
  -7.3860000e-02
   5.8540000e-02
  -5.0010000e-02
  -4.7540000e-02
   2.7120000e-02
   5.8000000e-04
  -4.4690000e-02
  -8.0280000e-02
  -3.0740000e-02
  -3.7860000e-02
   1.4010000e-02
  -9.8950000e-02
  -3.4500000e-03
   2.3300000e-03
  -1.1130000e-02
  -5.6200000e-03
  -7.5260000e-02
   1.0800000e-02
   1.9850000e-02
  -5.4890000e-02
   9.1550000e-02
  -5.1740000e-02
  -8.3400000e-03
   3.2550000e-02
   9.4810000e-02
  -5.8180000e-02
  -8.3680000e-02
   1.1296000e-01
  -2.3550000e-02
  -5.1500000e-03
  -4.9980000e-02
   2.7360000e-02
   3.3610000e-02
  -4.4910000e-02
  -1.0340000e-02
  -6.0900000e-03
  -6.3860000e-02
  -4.7270000e-02
   3.2380000e-02
  -5.8070000e-02
  -1.4260000e-02
   8.0830000e-02
  -4.7020000e-02
  -1.1460000e-02
   5.0810000e-02
   8.2500000e-03
  -1.3106000e-01
   3.6000000e-02
   2.4460000e-02
  -3.6000000e-04
  -9.1140000e-02
   1.1240000e-02
   3.3230000e-02
  -1.1768000e-01
   6.0510000e-02
   4.5650000e-02
  -1.1200000e-03
  -7.5700000e-02
  -6.6900000e-03
   8.4910000e-02
   2.5420000e-02
   1.1790000e-02
  -1.0250000e-02
   8.9300000e-02
  -4.5650000e-02
  -1.9380000e-02
   2.3250000e-02
   4.6500000e-02
  -2.7990000e-02
  -1.5600000e-02
   2.6180000e-02
   2.2590000e-02
   1.0470000e-02
  -7.7540000e-02
   8.7790000e-02
   7.6580000e-02
  -6.9310000e-02
   7.4470000e-02
   4.1950000e-02
   3.7450000e-02
  -8.1790000e-02
   1.0580000e-02
   5.4450000e-02
  -9.0700000e-02
   2.8760000e-02
   4.8310000e-02
  -4.3400000e-02
  -5.7410000e-02
   1.4310000e-02
   8.6750000e-02
  -6.3720000e-02
  -3.6710000e-02
   5.6870000e-02
   2.2480000e-02
  -1.4795000e-01
   1.1160000e-02
   1.4320000e-01
  -1.3218000e-01
   3.2050000e-02
   7.5320000e-02
  -9.8400000e-03
  -7.0740000e-02
  -1.1460000e-02
   9.6540000e-02
  -8.3490000e-02
  -5.1110000e-02
   4.5490000e-02
   4.6340000e-02
  -8.7600000e-02
  -5.4890000e-02
   9.0180000e-02
  -1.0926000e-01
   8.4780000e-02
  -1.2788000e-01
   2.5140000e-02
   6.8980000e-02
  -1.5818000e-01
   7.8110000e-02
   4.2220000e-02
  -3.1170000e-02
  -5.9170000e-02
   6.3200000e-02
   2.1610000e-02
  -8.2060000e-02
  -6.7120000e-02
   3.4440000e-02
   6.0370000e-02
  -6.5580000e-02
   5.1380000e-02
  -1.5410000e-02
   1.0140000e-02
   1.2720000e-02
  -4.8890000e-02
   3.3120000e-02
   6.9230000e-02
   4.5820000e-02
  -6.5800000e-02
   9.4130000e-02
  -3.4270000e-02
  -1.3843000e-01
   6.9590000e-02
   1.3821000e-01
   6.7560000e-02
  -1.1389000e-01
   3.4050000e-02
   7.8310000e-02
   2.5120000e-02
  -3.7540000e-02
  -2.4810000e-02
   8.1020000e-02
  -2.5830000e-02
  -5.3200000e-03
   8.6920000e-02
  -9.0000000e-04
  -8.0610000e-02
   2.5690000e-02
   2.3110000e-02
  -8.0230000e-02
  -1.9710000e-02
  -2.2980000e-02
   5.4640000e-02
  -7.6330000e-02
   1.5400000e-03
   5.7630000e-02
  -2.0780000e-02
  -2.5120000e-02
   3.7750000e-02
   2.8430000e-02
  -7.0660000e-02
  -2.0540000e-02
   4.3570000e-02
   1.6620000e-02
   2.7280000e-02
  -3.3830000e-02
   1.0756000e-01
  -6.2380000e-02
  -9.9580000e-02
   1.6042000e-01
   4.4280000e-02
  -5.4230000e-02
  -2.5720000e-02
   1.4789000e-01
  -7.3840000e-02
  -4.9570000e-02
   1.0383000e-01
   6.1880000e-02
  -3.2870000e-02
   1.6420000e-02
   1.0021000e-01
  -1.5900000e-02
  -1.3430000e-02
   6.8790000e-02
   5.0150000e-02
   2.5060000e-02
  -5.6210000e-02
   3.1860000e-02
   3.7370000e-02
  -8.9580000e-02
  -8.0000000e-05
   5.1190000e-02
   3.3530000e-02
  -7.5870000e-02
   9.2760000e-02
   4.1700000e-02
  -1.5460000e-02
   1.9270000e-02
   3.1230000e-02
   1.2415000e-01
  -6.8380000e-02
   8.7330000e-02
   9.1060000e-02
  -1.0537000e-01
  -2.7250000e-02
   8.0000000e-05
  -1.1800000e-03
   5.1600000e-02
  -4.9460000e-02
  -2.5470000e-02
   8.0090000e-02
  -3.2760000e-02
   6.1360000e-02
  -8.2000000e-03
  -9.6350000e-02
   1.1387000e-01
  -6.9900000e-03
  -1.4450000e-02
   1.2910000e-02
  -4.7710000e-02
   3.8900000e-03
  -5.9850000e-02
   2.3990000e-02
  -6.3120000e-02
  -1.0742000e-01
   2.9230000e-02
   5.3790000e-02
  -1.3160000e-02
  -5.4300000e-03
   3.6190000e-02
   6.0570000e-02
   1.0696000e-01
  -1.1350000e-02
   1.1222000e-01
   2.1170000e-02
  -2.3030000e-02
   1.5740000e-02
   9.5630000e-02
  -1.0140000e-02
  -6.6520000e-02
  -3.8700000e-03
   6.4410000e-02
  -2.9040000e-02
  -9.3030000e-02
   1.2796000e-01
   2.1190000e-02
  -2.0830000e-01
   9.0800000e-03
   5.5930000e-02
  -1.5680000e-02
  -2.4790000e-02
  -4.7190000e-02
   4.4720000e-02
  -4.2910000e-02
  -3.5620000e-02
   4.3490000e-02
  -4.6060000e-02
  -7.7020000e-02
  -8.1430000e-02
   1.2530000e-02
  -3.2710000e-02
  -2.6100000e-02
  -2.1770000e-02
   2.7970000e-02
  -1.0381000e-01
  -1.8530000e-02
   3.2960000e-02
  -1.0550000e-01
   2.3990000e-02
   2.3880000e-02
  -1.2670000e-02
  -3.8330000e-02
   1.2749000e-01
  -2.0340000e-02
  -9.3360000e-02
   6.9890000e-02
   2.0480000e-02
  -6.8490000e-02
  -7.7760000e-02
   8.3490000e-02
  -6.5310000e-02
  -1.0545000e-01
  -2.9560000e-02
   7.2030000e-02
  -3.5070000e-02
  -1.2950000e-01
   9.0340000e-02
   7.5870000e-02
  -1.7844000e-01
  -5.6040000e-02
   8.8620000e-02
  -3.0740000e-02
  -6.4270000e-02
   1.2010000e-02
   1.6251000e-01
  -1.2684000e-01
  -3.4990000e-02
   1.5220000e-02
  -5.9280000e-02
   6.2020000e-02
  -6.1500000e-02
   5.5190000e-02
   2.0340000e-02
  -8.2310000e-02
   2.2510000e-02
  -6.1220000e-02
  -1.0049000e-01
   5.8460000e-02
  -2.2480000e-02
  -3.4190000e-02
   3.4880000e-02
   4.5800000e-03
  -6.8500000e-03
  -5.0940000e-02
   7.2220000e-02
  -2.7830000e-02
  -3.0000000e-05
   4.7210000e-02
  -4.2220000e-02
  -9.1190000e-02
   7.6800000e-03
  -2.7560000e-02
  -4.3650000e-02
  -7.6800000e-03
   1.5440000e-02
   4.5430000e-02
  -1.1228000e-01
   5.6890000e-02
   6.9970000e-02
  -5.3740000e-02
  -8.1430000e-02
   4.5500000e-03
   9.2760000e-02
  -9.8050000e-02
  -5.2090000e-02
   9.3250000e-02
   2.8240000e-02
  -8.0880000e-02
   6.0050000e-02
   5.2370000e-02
  -2.0540000e-02
   2.9360000e-02
   1.1280000e-01
   2.9750000e-02
   2.2370000e-02
   3.1230000e-02
   6.1310000e-02
  -3.7650000e-02
  -3.2570000e-02
   1.4447000e-01
   5.7190000e-02
  -6.8870000e-02
   9.4890000e-02
   3.6550000e-02
   5.2120000e-02
  -2.8300000e-02
   8.6640000e-02
  -1.1650000e-02
  -5.3580000e-02
   1.6306000e-01
  -2.1060000e-02
  -4.5790000e-02
   4.8010000e-02
   8.1400000e-02
   9.5330000e-02
  -4.1870000e-02
   3.2820000e-02
   8.5220000e-02
  -7.6110000e-02
   6.6520000e-02
   6.4600000e-02
  -5.4860000e-02
  -4.6390000e-02
   8.2670000e-02
   2.2570000e-02
  -5.6920000e-02
   1.6810000e-02
   9.6210000e-02
  -2.5690000e-02
  -1.1570000e-02
   1.0800000e-02
   4.2640000e-02
   1.1601000e-01
  -1.1310000e-01
   3.7000000e-03
   1.4532000e-01
   1.6830000e-02
  -7.6830000e-02
   1.2812000e-01
   2.8160000e-02
   6.2200000e-03
   5.4400000e-02
  -9.6200000e-03
   1.1240000e-02
  -1.1650000e-02
   3.8300000e-02
  -5.6040000e-02
  -3.2460000e-02
   1.0945000e-01
   8.7680000e-02
  -5.8570000e-02
  -2.0730000e-02
   7.6410000e-02
  -9.5400000e-03
  -3.5920000e-02
   2.4050000e-02
  -1.9850000e-02
  -4.8940000e-02
  -2.1850000e-02
  -3.2270000e-02
  -5.2400000e-03
   6.0840000e-02
  -8.0990000e-02
   7.1750000e-02
   7.8440000e-02
   2.8300000e-02
  -1.4420000e-02
   3.1530000e-02
   6.6520000e-02
  -4.0850000e-02
  -2.9600000e-03
   1.9660000e-02
   1.8230000e-02
  -1.8450000e-02
  -3.2380000e-02
  -1.9700000e-03
  -3.6660000e-02
   5.2310000e-02
  -7.6800000e-03
  -3.3780000e-02
   1.6750000e-02
   6.3910000e-02
  -2.4130000e-02
  -9.1990000e-02
   1.1085000e-01
  -1.2610000e-02
  -8.9990000e-02
  -2.6020000e-02
   8.2360000e-02
   2.7720000e-02
  -1.2947000e-01
   6.3340000e-02
   6.2980000e-02
  -4.0360000e-02
  -5.6430000e-02
   1.1135000e-01
   3.3500000e-02
  -2.8350000e-02
   6.5910000e-02
  -8.7850000e-02
   5.7080000e-02
   1.1071000e-01
  -4.7790000e-02
  -3.4110000e-02
   6.6570000e-02
   4.6060000e-02
  -1.7740000e-02
  -3.4520000e-02
   3.3450000e-02
   4.2800000e-02
  -5.8620000e-02
  -6.7310000e-02
   1.4123000e-01
  -5.0450000e-02
  -2.1360000e-02
   2.8930000e-02
  -6.5300000e-03
  -5.6180000e-02
   2.2870000e-02
   1.4970000e-02
  -2.6130000e-02
  -2.8380000e-02
  -6.0920000e-02
  -2.1960000e-02
   3.4520000e-02
  -3.8140000e-02
  -4.3790000e-02
   9.3740000e-02
  -1.2867000e-01
  -2.6950000e-02
   1.1984000e-01
  -3.6660000e-02
  -6.9780000e-02
   7.3810000e-02
   1.4164000e-01
  -6.7390000e-02
   1.3400000e-03
   1.3344000e-01
  -9.1710000e-02
  -7.4080000e-02
  -2.2570000e-02
   2.0950000e-02
  -7.1370000e-02
  -8.9400000e-03
   8.5000000e-02
  -5.3600000e-02
  -8.2890000e-02
   2.5990000e-02
   5.7960000e-02
  -6.1140000e-02
  -8.5000000e-04
   6.3360000e-02
  -3.2550000e-02
   1.5380000e-02
  -1.1272000e-01
   1.0120000e-02
   6.0760000e-02
  -9.9610000e-02
   1.8400000e-02
   1.8780000e-02
   9.7600000e-03
  -5.3270000e-02
   4.9350000e-02
   1.5520000e-02
  -9.6000000e-03
  -5.1270000e-02
   1.0100000e-03
   5.5710000e-02
  -4.6170000e-02
  -6.8270000e-02
   3.2550000e-02
   5.4230000e-02
  -5.6810000e-02
  -3.1590000e-02
   2.6400000e-02
   5.0150000e-02
  -1.4820000e-01
   5.7250000e-02
   1.8230000e-02
  -3.5370000e-02
  -4.7730000e-02
   3.8690000e-02
   7.0440000e-02
  -8.3320000e-02
  -3.7290000e-02
   5.4510000e-02
  -6.5970000e-02
  -1.2552000e-01
   3.7510000e-02
   4.0770000e-02
  -1.3270000e-02
  -2.7770000e-02
   1.9102000e-01
   5.2370000e-02
  -1.4183000e-01
   4.1700000e-02
   1.5686000e-01
  -5.8040000e-02
  -1.1283000e-01
   5.2830000e-02
   3.3970000e-02
  -2.3660000e-02
  -2.4700000e-02
  -4.1290000e-02
  -5.6760000e-02
   3.3940000e-02
  -1.1200000e-03
  -3.2630000e-02
  -4.8580000e-02
  -5.7610000e-02
   5.2420000e-02
   2.4590000e-02
  -1.0180000e-01
   1.8620000e-02
   2.1440000e-02
   6.2500000e-03
  -4.9160000e-02
  -3.3590000e-02
   8.9140000e-02
  -5.7300000e-03
  -2.6380000e-02
   6.8820000e-02
  -3.4190000e-02
   1.5710000e-02
  -1.0002000e-01
  -3.1780000e-02
   5.1880000e-02
  -1.5600000e-02
  -7.6060000e-02
   3.9870000e-02
   5.9250000e-02
   2.2700000e-02
  -6.8550000e-02
  -4.0600000e-03
   1.0655000e-01
  -2.1410000e-02
  -5.1980000e-02
   6.2950000e-02
  -5.7470000e-02
  -3.8400000e-03
  -6.2760000e-02
  -6.5200000e-02
  -1.2480000e-02
  -9.3200000e-03
  -1.4890000e-02
  -3.7010000e-02
  -1.1178000e-01
   1.4200000e-02
   4.3430000e-02
  -1.0767000e-01
   3.6000000e-04
   2.0290000e-02
   1.0990000e-02
   3.9150000e-02
  -6.7040000e-02
   6.8050000e-02
   7.0550000e-02
  -7.0930000e-02
   9.1440000e-02
   4.0550000e-02
  -1.2310000e-02
   6.4840000e-02
   1.1790000e-02
  -2.1990000e-02
  -1.0800000e-02
   3.7210000e-02
  -7.8280000e-02
  -2.6380000e-02
  -1.2340000e-02
  -6.6600000e-03
   2.1470000e-02
  -1.5532000e-01
   1.2256000e-01
  -4.3270000e-02
  -6.9610000e-02
  -2.6920000e-02
   1.0940000e-02
   1.1631000e-01
  -1.1878000e-01
   9.7900000e-03
   8.0440000e-02
  -5.6670000e-02
  -4.5430000e-02
   2.6300000e-03
  -8.4690000e-02
  -1.6890000e-02
   2.4620000e-02
  -6.4900000e-02
   2.1100000e-03
   4.3810000e-02
  -8.2250000e-02
  -1.3870000e-02
   6.3250000e-02
  -1.0800000e-02
  -8.2250000e-02
  -5.1900000e-02
   5.0200000e-02
   8.3730000e-02
  -7.3120000e-02
   1.2860000e-02
   1.0400000e-01
  -4.3900000e-02
  -8.0230000e-02
   3.4850000e-02
   5.8780000e-02
  -7.5810000e-02
   3.5950000e-02
   1.7470000e-02
  -1.9000000e-02
  -3.5900000e-03
  -2.7800000e-02
   8.0000000e-05
   4.0850000e-02
  -5.6020000e-02
   3.8400000e-03
   1.0183000e-01
  -9.1800000e-02
  -2.8430000e-02
   1.9410000e-02
   2.0000000e-03
  -3.7210000e-02
  -6.7610000e-02
   4.6750000e-02
  -3.0900000e-02
  -1.3471000e-01
   3.3010000e-02
   6.1220000e-02
  -6.7150000e-02
   4.5950000e-02
  -3.3700000e-02
   2.0070000e-02
  -6.2950000e-02
  -5.0700000e-03
   7.7040000e-02
  -4.9410000e-02
   2.9780000e-02
   3.2790000e-02
  -1.9820000e-02
  -5.3930000e-02
   5.9110000e-02
   4.4880000e-02
  -4.9870000e-02
  -6.5830000e-02
   9.2700000e-02
   5.6650000e-02
  -2.4790000e-02
  -3.0960000e-02
  -1.2450000e-02
   3.6440000e-02
   1.3270000e-02
   3.3200000e-03
  -8.3320000e-02
  -3.5290000e-02
   5.0000000e-05
   3.2050000e-02
   1.7930000e-02
  -1.4515000e-01
   6.8050000e-02
   3.5230000e-02
  -1.2993000e-01
   2.0340000e-02
  -2.3990000e-02
   3.7120000e-02
   5.3770000e-02
  -4.1760000e-02
   1.4150000e-02
   4.0550000e-02
  -3.6930000e-02
  -1.4700000e-02
  -5.3630000e-02
  -2.7750000e-02
   6.0980000e-02
   8.9400000e-03
  -8.1650000e-02
   3.0270000e-02
   4.8780000e-02
  -1.0932000e-01
   1.3300000e-02
   3.7450000e-02
   1.2890000e-02
   7.9810000e-02
  -7.2110000e-02
   2.9860000e-02
   8.4610000e-02
  -8.8420000e-02
   1.9690000e-02
   1.0191000e-01
  -1.1976000e-01
  -6.5670000e-02
   1.3270000e-02
  -9.2920000e-02
   3.6080000e-02
  -2.4180000e-02
  -9.8320000e-02
   8.1400000e-02
  -2.1580000e-02
   2.5360000e-02
   5.5900000e-03
  -8.4370000e-02
   6.8900000e-02
   1.9270000e-02
  -5.2070000e-02
   2.4700000e-03
   5.8950000e-02
  -5.2970000e-02
   5.8890000e-02
   1.1020000e-02
  -3.2980000e-02
  -3.0820000e-02
   4.2640000e-02
   1.5201000e-01
  -1.0827000e-01
  -2.2510000e-02
   3.3920000e-02
   6.3000000e-04
  -1.6500000e-03
  -6.6870000e-02
   1.3600000e-02
   1.0348000e-01
  -2.3200000e-02
  -6.8660000e-02
   7.1150000e-02
  -3.6660000e-02
  -2.6460000e-02
   6.6100000e-03
   6.5530000e-02
  -3.7890000e-02
  -6.4510000e-02
   6.0270000e-02
   3.3560000e-02
  -6.4950000e-02
  -1.3900000e-02
  -5.0700000e-03
  -9.0530000e-02
  -4.9760000e-02
  -8.8000000e-04
  -1.1710000e-02
   1.8600000e-03
  -1.7710000e-02
   3.4160000e-02
   1.2612000e-01
  -3.5180000e-02
   1.4700000e-02
   3.9870000e-02
   1.0021000e-01
  -2.6400000e-02
  -5.5700000e-03
   2.7250000e-02
  -2.2260000e-02
  -5.4780000e-02
   1.7330000e-02
  -1.5030000e-02
  -3.0110000e-02
   4.9410000e-02
  -7.9200000e-03
  -8.2420000e-02
  -6.5360000e-02
   7.1860000e-02
  -5.0200000e-03
  -1.0309000e-01
   3.1500000e-02
   4.6450000e-02
  -4.3620000e-02
  -1.8530000e-02
   5.2100000e-03
   1.3130000e-02
  -7.0270000e-02
  -5.2590000e-02
   7.9870000e-02
   1.0310000e-02
  -8.2390000e-02
   4.0910000e-02
   5.8180000e-02
  -2.3550000e-02
   4.7570000e-02
   2.5720000e-02
  -2.6320000e-02
  -2.5660000e-02
   1.8860000e-02
  -1.2623000e-01
   3.5860000e-02
   1.1206000e-01
  -3.4270000e-02
  -1.0660000e-01
   9.5800000e-02
  -1.1000000e-03
  -3.0210000e-02
   7.9400000e-02
  -7.9050000e-02
  -2.0970000e-02
   1.7960000e-02
  -8.3600000e-03
  -5.4700000e-02
  -3.6110000e-02
   3.6490000e-02
  -6.5860000e-02
  -4.4170000e-02
   5.0830000e-02
   8.3050000e-02
   2.6600000e-02
  -4.2740000e-02
   7.9510000e-02
  -3.6380000e-02
  -6.9940000e-02
   8.2420000e-02
   3.4710000e-02
  -5.4040000e-02
   2.0800000e-03
  -1.1490000e-02
  -3.2350000e-02
   6.0900000e-03
  -7.3540000e-02
  -1.1380000e-02
  -1.4070000e-02
   2.0870000e-02
   2.9560000e-02
  -7.0500000e-03
   1.1300000e-02
   1.2780000e-02
  -1.1980000e-02
   1.5160000e-02
  -9.0100000e-02
   5.0500000e-02
   5.7330000e-02
  -8.4690000e-02
   9.0500000e-03
  -4.8560000e-02
   4.1400000e-03
   1.6200000e-03
  -2.8490000e-02
   1.2170000e-02
  -1.8420000e-02
  -3.1800000e-03
  -3.1590000e-02
   8.2500000e-02
  -5.6920000e-02
  -1.9170000e-02
   2.1910000e-02
   6.5500000e-03
   4.3900000e-03
  -1.3380000e-02
   1.5080000e-02
  -1.3740000e-02
   2.1170000e-02
  -3.7290000e-02
   4.4830000e-02
  -2.3910000e-02
  -3.4050000e-02
  -4.4250000e-02
   9.0120000e-02
  -9.8710000e-02
  -4.9460000e-02
   1.7389000e-01
  -7.8580000e-02
   8.0000000e-04
  -1.2900000e-03
   7.3730000e-02
   2.3940000e-02
  -4.5760000e-02
   3.3090000e-02
   7.0700000e-03
  -2.9560000e-02
   2.8460000e-02
  -8.7200000e-03
  -2.6680000e-02
   5.7580000e-02
  -2.6160000e-02
  -3.8580000e-02
  -3.6050000e-02
   1.0610000e-02
   8.8600000e-03
  -2.5470000e-02
   1.7850000e-02
   6.9530000e-02
  -5.4920000e-02
  -4.0690000e-02
  -1.1823000e-01
   7.2000000e-02
   3.0160000e-02
  -6.2570000e-02
  -2.4570000e-02
   2.9090000e-02
   8.4040000e-02
  -1.3715000e-01
  -1.5520000e-02
   1.3479000e-01
  -9.1190000e-02
   3.4220000e-02
   4.1700000e-02
  -2.8900000e-02
   1.2610000e-02
  -6.0620000e-02
   8.0500000e-02
  -1.3700000e-03
  -4.6940000e-02
   5.8290000e-02
  -9.1600000e-03
  -1.9600000e-02
  -3.5150000e-02
   7.8700000e-03
   4.0660000e-02
   1.8510000e-02
  -4.8560000e-02
   5.2420000e-02
  -6.4870000e-02
  -3.1720000e-02
   3.9200000e-03
  -5.9990000e-02
   1.3377000e-01
  -1.1270000e-02
  -2.4700000e-02
   7.4440000e-02
  -2.4810000e-02
  -9.1300000e-03
  -7.6910000e-02
   3.9840000e-02
  -2.8760000e-02
  -1.0293000e-01
   5.4180000e-02
  -4.0960000e-02
   2.5960000e-02
  -6.1400000e-03
  -5.0560000e-02
   1.0389000e-01
  -2.7470000e-02
  -5.7410000e-02
   3.2900000e-02
   5.0310000e-02
  -5.1790000e-02
  -3.3090000e-02
   7.6140000e-02
   7.7920000e-02
  -4.9240000e-02
  -2.6270000e-02
   7.1620000e-02
   2.0400000e-02
  -9.1490000e-02
   7.4140000e-02
  -1.2900000e-03
  -4.1810000e-02
  -4.9680000e-02
   1.0530000e-02
   3.6900000e-02
  -4.1700000e-03
  -8.6700000e-02
  -1.1392000e-01
   1.4935000e-01
  -1.3194000e-01
  -2.0400000e-02
   1.2409000e-01
  -4.6170000e-02
  -5.1850000e-02
   4.3950000e-02
   3.1860000e-02
  -4.1290000e-02
   7.4300000e-03
  -3.9130000e-02
   2.3500000e-02
  -2.7000000e-04
  -2.8460000e-02
   4.4390000e-02
   4.2580000e-02
  -2.4590000e-02
   1.8780000e-02
   7.3290000e-02
  -7.4250000e-02
  -8.5300000e-03
   9.4430000e-02
   5.4300000e-03
  -5.4260000e-02
   3.8100000e-03
  -1.8400000e-03
  -3.4680000e-02
   4.5930000e-02
  -1.0156000e-01
   5.1570000e-02
  -3.2900000e-02
  -2.2590000e-02
  -9.2400000e-03
  -3.3750000e-02
   2.4370000e-02
   2.2000000e-04
  -1.4830000e-02
   2.4790000e-02
  -5.4070000e-02
   3.4790000e-02
  -2.1500000e-02
  -2.0260000e-02
  -9.5700000e-03
   1.3416000e-01
   2.0020000e-02
  -6.4050000e-02
   2.9610000e-02
  -1.7410000e-02
  -5.9500000e-03
  -6.2460000e-02
   3.7700000e-02
  -4.5510000e-02
  -4.3400000e-02
   4.8420000e-02
   2.5280000e-02
  -1.1236000e-01
   4.2470000e-02
   4.4640000e-02
  -5.1410000e-02
  -3.6140000e-02
   3.5450000e-02
   3.5750000e-02
  -1.1240000e-02
   1.0610000e-02
   3.0050000e-02
  -1.2610000e-02
  -8.4480000e-02
   3.5400000e-03
   1.1724000e-01
  -7.4140000e-02
  -3.2680000e-02
   4.9100000e-03
   6.0460000e-02
   3.3070000e-02
  -6.0400000e-02
  -2.4480000e-02
  -2.3550000e-02
   6.6760000e-02
  -1.4920000e-02
  -7.2490000e-02
  -2.1080000e-02
   8.3400000e-03
   6.0210000e-02
  -7.7680000e-02
   1.1612000e-01
   1.1130000e-02
   5.2000000e-04
   5.8870000e-02
  -2.8900000e-02
  -6.8800000e-03
  -1.2010000e-02
   2.9200000e-02
  -1.3240000e-02
  -6.3560000e-02
   3.6440000e-02
   5.5800000e-02
   9.7900000e-03
  -2.7660000e-02
  -5.3300000e-02
  -4.2140000e-02
   6.2570000e-02
  -1.9800000e-02
  -5.6100000e-02
   8.1760000e-02
  -4.1570000e-02
  -4.4830000e-02
   1.6640000e-02
   3.2160000e-02
  -7.8940000e-02
  -2.0450000e-02
   7.9540000e-02
  -4.7160000e-02
  -2.1110000e-02
   7.0440000e-02
   5.2100000e-03
  -8.1870000e-02
   8.8070000e-02
   2.2760000e-02
  -3.1590000e-02
  -7.5320000e-02
  -3.7180000e-02
   4.5160000e-02
  -5.0230000e-02
   4.9900000e-03
   4.2880000e-02
   3.8100000e-03
  -8.3950000e-02
   2.2020000e-02
   3.2490000e-02
   4.0000000e-03
  -3.6800000e-02
  -2.7000000e-04
   4.1650000e-02
  -2.7690000e-02
   4.7100000e-02
   2.9890000e-02
   1.9000000e-04
   5.7900000e-03
  -2.3580000e-02
  -1.9660000e-02
  -2.3030000e-02
   2.5170000e-02
  -3.4990000e-02
  -9.9200000e-02
  -4.0330000e-02
   7.0770000e-02
   4.9400000e-03
  -5.8210000e-02
   3.6740000e-02
   3.1040000e-02
  -3.9070000e-02
   2.0260000e-02
   6.9810000e-02
   4.9100000e-03
  -8.5760000e-02
   5.5360000e-02
  -1.3600000e-02
  -7.7760000e-02
   1.0420000e-02
   1.1080000e-02
   6.3300000e-03
   6.5640000e-02
   1.4180000e-02
  -1.2970000e-02
   4.2960000e-02
  -4.6010000e-02
  -1.5270000e-02
   4.6010000e-02
   9.3000000e-04
  -2.7340000e-02
   3.3150000e-02
  -2.2320000e-02
  -2.2670000e-02
   3.2680000e-02
  -6.4870000e-02
  -9.4180000e-02
   1.4677000e-01
  -2.6540000e-02
   2.2480000e-02
   4.5510000e-02
   5.0700000e-02
   1.0690000e-02
  -1.2659000e-01
   4.1810000e-02
   1.0010000e-01
  -1.3566000e-01
  -2.3990000e-02
   1.3155000e-01
   3.8000000e-04
  -6.5970000e-02
   1.7470000e-02
   5.8260000e-02
  -2.0510000e-02
   9.6800000e-03
   1.0970000e-02
  -4.3760000e-02
  -5.9200000e-02
   2.3660000e-02
   9.1300000e-03
  -9.6240000e-02
   5.1220000e-02
  -7.3210000e-02
  -1.6090000e-02
   7.7480000e-02
   2.3000000e-03
  -6.8710000e-02
   1.8890000e-02
   2.8900000e-02
   2.2760000e-02
   3.7590000e-02
  -7.7920000e-02
   2.0150000e-02
  -2.9260000e-02
   1.5100000e-03
   2.3470000e-02
   9.8810000e-02
  -1.0282000e-01
  -3.7590000e-02
   1.5447000e-01
  -3.6930000e-02
  -1.0954000e-01
  -3.5290000e-02
   1.0400000e-01
  -5.5700000e-03
  -4.6830000e-02
   2.3000000e-03
   1.0153000e-01
  -3.9890000e-02
   1.8530000e-02
   4.0140000e-02
  -2.6600000e-03
  -8.6900000e-03
  -4.1400000e-02
   3.6050000e-02
  -7.9500000e-03
  -1.4530000e-02
  -3.1970000e-02
   2.9300000e-03
   2.6810000e-02
   2.3030000e-02
  -3.3780000e-02
   3.5970000e-02
  -3.4850000e-02
  -8.4090000e-02
   1.3520000e-01
   6.4980000e-02
  -1.5042000e-01
  -3.4050000e-02
   9.6100000e-02
  -1.8100000e-02
  -8.3380000e-02
  -1.1730000e-02
   1.3133000e-01
  -8.4560000e-02
  -4.0470000e-02
   6.7940000e-02
   7.2440000e-02
  -7.6200000e-02
  -5.1300000e-02
   1.7402000e-01
  -8.5350000e-02
  -9.3440000e-02
   1.6890000e-02
   3.2850000e-02
  -5.0040000e-02
   4.6100000e-03
   6.6820000e-02
  -1.4260000e-02
  -5.6700000e-02
   8.6340000e-02
  -3.5100000e-02
  -4.4830000e-02
  -3.7070000e-02
   6.5640000e-02
  -3.1940000e-02
  -5.9740000e-02
   1.0688000e-01
   3.2410000e-02
  -1.4597000e-01
   5.4150000e-02
   1.0500000e-02
  -1.1414000e-01
   5.8730000e-02
   6.0290000e-02
  -2.3580000e-02
  -6.3280000e-02
  -7.1000000e-04
   1.1167000e-01
  -9.4260000e-02
  -3.0900000e-02
   1.1790000e-02
  -6.6930000e-02
   9.7900000e-03
   1.9470000e-02
  -1.9520000e-02
  -2.2620000e-02
   6.8930000e-02
  -9.4600000e-03
   4.5210000e-02
   2.8790000e-02
   6.6820000e-02
  -7.0160000e-02
  -2.8840000e-02
   1.0990000e-02
  -3.1260000e-02
  -3.4820000e-02
  -1.1630000e-02
  -3.2980000e-02
   2.5720000e-02
  -2.6810000e-02
  -8.9380000e-02
   1.2486000e-01
   2.7200000e-02
  -6.1610000e-02
  -6.9000000e-04
   1.1077000e-01
   2.5770000e-02
  -1.3210000e-01
   1.6290000e-02
   3.1720000e-02
   2.5910000e-02
  -5.1800000e-03
  -4.5400000e-02
   1.7220000e-02
   1.7000000e-02
  -6.5310000e-02
  -3.4630000e-02
  -2.4680000e-02
   1.9440000e-02
   3.0160000e-02
   4.6600000e-03
   7.8330000e-02
  -9.2870000e-02
  -3.3230000e-02
   1.2881000e-01
  -6.2130000e-02
   1.4480000e-02
  -1.2060000e-02
   5.8350000e-02
  -6.4840000e-02
  -3.2160000e-02
   3.4350000e-02
  -3.6820000e-02
   1.5110000e-02
  -1.0899000e-01
   7.0050000e-02
  -1.4640000e-02
   1.6500000e-03
   1.7050000e-02
   8.1790000e-02
  -4.7320000e-02
   1.1050000e-02
   1.0773000e-01
  -1.1565000e-01
  -3.4500000e-03
   1.8560000e-02
  -1.9850000e-02
  -2.0560000e-02
  -2.4290000e-02
   5.0040000e-02
  -1.3015000e-01
   2.6900000e-03
   1.3080000e-02
   2.2500000e-03
  -4.3290000e-02
  -2.5250000e-02
  -4.5270000e-02
   8.2390000e-02
  -2.7560000e-02
  -5.6290000e-02
   1.5349000e-01
   6.7200000e-03
   2.7720000e-02
  -4.6970000e-02
   6.9090000e-02
   1.1028000e-01
  -1.3377000e-01
   4.3620000e-02
  -2.8900000e-02
   3.5700000e-02
   9.6800000e-03
  -6.6270000e-02
  -2.7010000e-02
  -3.0410000e-02
   1.7380000e-02
  -4.2030000e-02
  -3.5950000e-02
   3.2410000e-02
   4.3290000e-02
  -1.1324000e-01
   6.2710000e-02
   9.9800000e-03
   9.2100000e-03
  -5.4510000e-02
   4.8670000e-02
  -1.6750000e-02
  -6.8740000e-02
   3.9810000e-02
   2.5470000e-02
   3.0300000e-02
  -1.0016000e-01
   4.2250000e-02
   4.6470000e-02
   1.1600000e-02
  -1.2618000e-01
   2.6810000e-02
   5.4370000e-02
  -4.4000000e-04
   2.5610000e-02
  -1.1272000e-01
   5.6480000e-02
  -4.5190000e-02
  -1.5410000e-02
   8.8230000e-02
  -4.2250000e-02
   1.0420000e-02
  -1.0200000e-02
   3.3890000e-02
  -3.4550000e-02
   3.2600000e-03
   5.1220000e-02
   1.3850000e-02
  -8.7110000e-02
   1.0194000e-01
  -5.2600000e-03
  -9.2210000e-02
   5.1880000e-02
   6.3600000e-03
  -1.9060000e-02
   2.3770000e-02
   5.8240000e-02
   1.9960000e-02
  -6.8550000e-02
   2.2460000e-02
   1.2900000e-03
  -8.1460000e-02
   6.6100000e-03
   1.8320000e-02
  -8.4610000e-02
   5.0040000e-02
  -2.1100000e-03
   1.7580000e-02
  -4.0520000e-02
   3.3200000e-02
   9.2950000e-02
  -1.5464000e-01
   3.8330000e-02
  -2.8710000e-02
  -2.8050000e-02
  -3.0460000e-02
  -1.0340000e-02
   4.8670000e-02
  -9.5360000e-02
   9.5400000e-03
   4.3000000e-03
   5.0150000e-02
   3.4000000e-02
  -5.4120000e-02
   4.5240000e-02
   8.5870000e-02
  -1.0852000e-01
  -3.3230000e-02
   4.1680000e-02
  -3.6360000e-02
  -3.0960000e-02
   3.0000000e-05
   4.5570000e-02
  -1.0230000e-02
  -1.9990000e-02
   7.8690000e-02
   2.2670000e-02
  -6.9500000e-02
  -6.0350000e-02
   1.0770000e-01
   2.6810000e-02
  -1.0997000e-01
   6.5610000e-02
   4.3270000e-02
  -6.2760000e-02
  -3.2270000e-02
  -3.3340000e-02
   5.5190000e-02
  -1.4860000e-02
  -6.7260000e-02
  -2.2800000e-03
  -5.9990000e-02
   2.9060000e-02
  -2.0340000e-02
  -5.8000000e-04
   3.6270000e-02
  -6.0900000e-03
   4.1900000e-03
  -5.3500000e-03
   7.6990000e-02
  -3.8080000e-02
  -1.9880000e-02
   4.7870000e-02
  -5.5060000e-02
  -9.0800000e-03
  -2.5420000e-02
  -7.1260000e-02
   2.0890000e-02
  -1.2580000e-02
  -4.1950000e-02
   8.3100000e-02
  -7.3500000e-03
   2.1000000e-02
   1.1000000e-03
   3.0700000e-03
   9.5420000e-02
  -8.8290000e-02
   1.4970000e-02
   4.8860000e-02
  -3.0870000e-02
   2.2840000e-02
  -6.9180000e-02
   7.3890000e-02
  -8.0310000e-02
  -6.3910000e-02
