# Supplementary material for: A Novel Classification Method for Flutter Signals Based on the CNN and STFT
Source: Hindawi journal article supplement (doi:10.1155/2019/9375437), 2019-04-09
Supplement: f1 [file 9375437.f1.zip › 00_25_z15.0_21channel.txt]

  -3.6490000e-02
  -4.7820000e-02
   7.8100000e-03
  -1.1240000e-02
   7.8720000e-02
  -1.5770000e-02
   4.4420000e-02
   4.6900000e-03
   1.7960000e-02
  -1.1730000e-02
  -6.0130000e-02
   4.6560000e-02
  -1.8010000e-02
  -2.1660000e-02
   2.9580000e-02
   1.6780000e-02
  -4.1430000e-02
   1.0990000e-02
   4.2330000e-02
   2.9900000e-03
  -3.7290000e-02
  -2.9640000e-02
   6.7670000e-02
  -6.1420000e-02
  -2.1660000e-02
  -2.8190000e-02
   4.4140000e-02
   5.3990000e-02
  -8.7570000e-02
   2.2150000e-02
   1.1644000e-01
  -9.5700000e-03
  -5.8620000e-02
  -2.1330000e-02
   7.6800000e-02
  -6.9940000e-02
  -1.3960000e-02
  -1.7050000e-02
   6.2760000e-02
   5.2070000e-02
  -1.4896000e-01
   7.3560000e-02
   1.1812000e-01
  -2.0650000e-02
  -1.3059000e-01
   5.2640000e-02
   1.0241000e-01
  -9.6810000e-02
  -3.4820000e-02
   1.5000000e-02
   3.8500000e-02
  -6.9040000e-02
  -6.8330000e-02
   2.5530000e-02
   3.8330000e-02
   6.4570000e-02
  -5.2510000e-02
  -3.6380000e-02
   1.3665000e-01
  -8.2120000e-02
  -7.6800000e-03
   3.6520000e-02
  -9.4600000e-03
   2.5010000e-02
  -6.8220000e-02
  -1.5980000e-02
   5.8650000e-02
  -2.6210000e-02
  -2.8270000e-02
   1.9110000e-02
  -3.7150000e-02
   1.0246000e-01
  -4.7870000e-02
  -3.9590000e-02
   1.5820000e-02
   5.1930000e-02
  -2.6570000e-02
  -1.0670000e-02
   3.6740000e-02
   6.8220000e-02
  -9.7300000e-03
  -6.1750000e-02
  -8.1700000e-03
   1.5460000e-02
   6.1390000e-02
  -1.0106000e-01
   4.4100000e-03
   4.3460000e-02
  -5.9200000e-02
  -6.4510000e-02
   8.9400000e-03
   1.1184000e-01
   2.5910000e-02
  -6.8820000e-02
   5.9850000e-02
  -1.5080000e-02
  -1.1033000e-01
   4.0000000e-03
   8.8800000e-03
  -7.8100000e-03
  -9.1300000e-03
   1.5160000e-02
   3.3810000e-02
   6.3090000e-02
   5.0200000e-03
  -2.4620000e-02
  -2.6100000e-02
   2.1000000e-02
   1.6000000e-04
  -8.2060000e-02
   5.1000000e-02
   9.7300000e-03
  -1.8560000e-02
  -3.0200000e-03
  -3.3860000e-02
   7.7590000e-02
   3.1640000e-02
  -3.0000000e-05
  -2.3630000e-02
  -4.9540000e-02
   7.0700000e-03
   3.3040000e-02
  -1.2170000e-02
   3.4710000e-02
  -1.7960000e-02
  -2.7640000e-02
   4.7820000e-02
   4.5680000e-02
  -5.6510000e-02
  -2.8240000e-02
   3.8470000e-02
  -2.1220000e-02
  -6.4790000e-02
   5.3700000e-03
   5.5250000e-02
   1.9500000e-03
  -6.8500000e-03
  -1.0049000e-01
   7.2880000e-02
   5.9140000e-02
  -6.4320000e-02
  -6.5800000e-03
   7.1260000e-02
   4.7540000e-02
  -5.3710000e-02
  -5.1440000e-02
   8.5190000e-02
   1.0530000e-02
   3.5750000e-02
  -1.1406000e-01
  -2.6240000e-02
   7.3890000e-02
  -3.3700000e-02
   2.7580000e-02
   3.6360000e-02
  -4.5620000e-02
  -4.5490000e-02
   3.3070000e-02
   2.1770000e-02
  -5.2000000e-04
  -2.2890000e-02
   9.0430000e-02
  -7.2380000e-02
  -3.0050000e-02
   6.2510000e-02
  -3.1780000e-02
  -4.0960000e-02
  -7.8100000e-03
   1.2340000e-02
   3.1450000e-02
  -8.6860000e-02
  -1.9580000e-02
   9.8490000e-02
   1.0360000e-02
  -3.7260000e-02
   4.9430000e-02
   3.2820000e-02
  -2.4050000e-02
  -2.7340000e-02
   4.1100000e-02
   7.5700000e-03
  -3.9950000e-02
   1.7960000e-02
  -5.1800000e-03
  -3.8900000e-03
   7.8100000e-03
  -9.4350000e-02
   4.1460000e-02
   3.8030000e-02
  -2.4730000e-02
   9.6800000e-03
   5.7000000e-03
   7.2700000e-03
  -4.1950000e-02
   1.0720000e-02
  -9.5100000e-03
   7.9980000e-02
  -2.4790000e-02
  -3.9590000e-02
   5.8620000e-02
  -1.9270000e-02
  -7.8610000e-02
   6.2800000e-03
   3.8880000e-02
   7.7000000e-03
  -7.2900000e-02
   8.6100000e-03
   5.2780000e-02
   2.2020000e-02
  -7.1120000e-02
  -2.1900000e-03
   5.2970000e-02
  -4.9600000e-03
  -7.2100000e-03
  -9.2840000e-02
   6.0000000e-03
   5.0700000e-02
  -4.4660000e-02
   5.8870000e-02
   1.2890000e-02
   6.6870000e-02
  -1.9490000e-02
  -3.4930000e-02
   2.8430000e-02
  -1.6290000e-02
  -1.1100000e-02
   1.9470000e-02
  -2.2670000e-02
   7.4000000e-04
   7.7540000e-02
  -6.4980000e-02
  -1.5570000e-02
   6.9700000e-02
   6.9530000e-02
  -1.0296000e-01
  -2.0480000e-02
   1.0627000e-01
  -3.1340000e-02
  -1.1921000e-01
  -7.0790000e-02
  -1.6830000e-02
   4.0440000e-02
  -4.7430000e-02
   9.9000000e-04
   5.8210000e-02
   2.0450000e-02
   1.0750000e-02
   4.7000000e-04
   2.1990000e-02
   2.4870000e-02
  -3.2000000e-02
   1.8120000e-02
  -1.4280000e-02
  -2.3910000e-02
  -7.1750000e-02
  -2.3900000e-03
   9.2650000e-02
  -1.6830000e-02
  -8.2640000e-02
   8.9030000e-02
   7.4330000e-02
   4.7300000e-02
  -5.5580000e-02
  -1.7270000e-02
  -2.1930000e-02
   2.7700000e-03
   5.2900000e-03
  -1.5790000e-02
  -5.1300000e-02
   1.3960000e-02
   8.1700000e-03
   1.5600000e-03
   8.3950000e-02
  -5.9940000e-02
  -3.8030000e-02
  -2.4950000e-02
   1.0640000e-02
   4.1810000e-02
   1.0530000e-02
  -1.4230000e-02
   7.6440000e-02
  -1.8970000e-02
  -2.7030000e-02
   7.2700000e-03
   4.4770000e-02
   1.4010000e-02
  -5.0670000e-02
   7.9730000e-02
  -1.8840000e-02
  -1.7490000e-02
  -1.9220000e-02
   7.0330000e-02
   1.1630000e-02
  -1.5228000e-01
   4.8230000e-02
   5.3600000e-02
  -2.8000000e-03
  -1.0170000e-02
  -2.7830000e-02
  -4.6900000e-03
   4.8800000e-03
  -6.5500000e-03
   3.5900000e-03
  -9.2400000e-03
  -6.9900000e-03
   1.2300000e-03
  -6.4400000e-03
   1.1820000e-02
  -2.4680000e-02
  -5.7880000e-02
  -2.0810000e-02
   6.6490000e-02
  -4.2280000e-02
   7.1150000e-02
   2.6840000e-02
   5.1800000e-03
   1.3650000e-02
   5.2000000e-04
  -1.4010000e-02
  -2.6020000e-02
   7.2250000e-02
   1.6830000e-02
   3.3890000e-02
  -2.2700000e-02
  -1.1957000e-01
   1.1601000e-01
  -9.2840000e-02
  -6.8270000e-02
   8.6860000e-02
   8.0000000e-04
  -5.3160000e-02
  -4.6060000e-02
   3.2600000e-02
   3.9450000e-02
  -4.4940000e-02
   1.9960000e-02
   9.9800000e-03
   2.1440000e-02
   8.2780000e-02
  -2.7140000e-02
  -3.2240000e-02
   4.1400000e-02
  -3.5450000e-02
  -7.7000000e-03
   1.3000000e-02
   4.0390000e-02
  -7.1000000e-03
  -8.1620000e-02
   3.4800000e-03
   3.0740000e-02
   2.7400000e-03
  -5.5400000e-03
   4.3810000e-02
   2.1000000e-02
   3.0240000e-02
  -2.3580000e-02
   4.1730000e-02
   8.4720000e-02
  -3.9290000e-02
  -4.6970000e-02
   1.3020000e-02
  -2.3770000e-02
  -9.6680000e-02
   1.4340000e-02
  -4.6060000e-02
   4.0090000e-02
  -5.7770000e-02
  -2.0000000e-03
   2.8900000e-02
  -1.9580000e-02
   3.3670000e-02
  -3.5860000e-02
  -5.0040000e-02
   5.5930000e-02
   3.5590000e-02
  -2.4160000e-02
   5.0450000e-02
  -5.3770000e-02
   5.8650000e-02
  -5.1500000e-03
  -4.5050000e-02
   2.6870000e-02
  -6.0950000e-02
   3.5230000e-02
   6.3830000e-02
   2.2020000e-02
  -2.4540000e-02
   6.9970000e-02
   7.9200000e-03
  -4.2530000e-02
  -1.3410000e-02
  -4.3270000e-02
   4.6300000e-03
   9.0000000e-04
  -3.4250000e-02
   2.7340000e-02
   5.1660000e-02
   1.8900000e-03
   1.2670000e-02
  -2.5030000e-02
  -5.3790000e-02
   1.0394000e-01
  -7.8470000e-02
  -1.0449000e-01
   1.3900000e-02
   3.6550000e-02
   2.5750000e-02
  -1.1889000e-01
   6.6000000e-04
   7.6610000e-02
  -1.2423000e-01
  -1.5900000e-03
   4.3620000e-02
   3.0130000e-02
   1.5980000e-02
  -7.2520000e-02
   6.3280000e-02
   1.2530000e-02
   6.8790000e-02
   3.0850000e-02
  -6.9500000e-02
   1.2810000e-01
  -9.4480000e-02
   4.1370000e-02
   5.6320000e-02
  -5.8480000e-02
  -2.0020000e-02
   1.2780000e-02
   4.8340000e-02
  -1.0238000e-01
  -1.4120000e-02
  -8.3900000e-03
   5.5990000e-02
   3.6300000e-02
   1.2370000e-02
  -7.7600000e-03
   6.2020000e-02
  -1.6400000e-02
  -4.3950000e-02
  -5.8900000e-03
  -2.9580000e-02
   1.5680000e-02
   2.3200000e-02
  -1.9030000e-02
  -4.6600000e-03
  -3.7670000e-02
   6.9150000e-02
  -1.3790000e-02
   2.2070000e-02
  -4.4580000e-02
  -5.0200000e-03
   1.0915000e-01
  -1.0512000e-01
   5.9110000e-02
   3.9590000e-02
  -8.9440000e-02
   3.6550000e-02
   6.9860000e-02
   1.3460000e-02
  -4.1150000e-02
  -4.4770000e-02
   6.7700000e-02
  -7.2100000e-03
  -6.5970000e-02
  -6.3880000e-02
  -3.7670000e-02
  -7.4000000e-03
  -6.9780000e-02
   2.0300000e-03
   1.0970000e-02
   3.6630000e-02
  -5.2510000e-02
   4.4280000e-02
   1.1636000e-01
   3.0000000e-02
   3.3500000e-03
  -1.5880000e-02
   1.5520000e-02
   6.5060000e-02
  -5.1880000e-02
  -3.8600000e-02
   1.6010000e-02
   2.6320000e-02
  -3.1340000e-02
  -1.0507000e-01
   8.6600000e-03
   7.2710000e-02
  -2.5500000e-03
  -7.3070000e-02
  -2.4050000e-02
   1.2873000e-01
   3.4000000e-02
  -1.6818000e-01
   6.7040000e-02
   1.4145000e-01
  -1.0265000e-01
  -4.9960000e-02
   8.6390000e-02
  -1.8840000e-02
  -1.0640000e-02
  -2.6920000e-02
  -2.4590000e-02
   1.4610000e-02
  -6.2490000e-02
   3.3700000e-03
   8.4610000e-02
  -3.0960000e-02
  -1.9580000e-02
   3.4710000e-02
  -4.6250000e-02
   4.9540000e-02
  -2.5280000e-02
  -3.9700000e-02
   6.0700000e-02
  -5.2070000e-02
  -2.3940000e-02
  -6.4510000e-02
   3.4220000e-02
   7.1420000e-02
  -2.1700000e-03
   3.8170000e-02
   3.5260000e-02
   3.8280000e-02
   3.7700000e-02
  -7.1700000e-02
  -4.7200000e-03
  -2.7000000e-04
  -4.3650000e-02
  -1.4390000e-02
  -1.5410000e-02
   1.2780000e-02
   2.5310000e-02
  -8.2200000e-02
   5.4000000e-03
   2.9280000e-02
  -3.7620000e-02
   1.0090000e-02
  -2.4650000e-02
   2.8130000e-02
   1.0450000e-02
   4.7400000e-03
  -1.8840000e-02
  -2.8490000e-02
   5.5190000e-02
   2.5000000e-03
   3.3890000e-02
  -2.7230000e-02
  -9.3000000e-04
  -1.2390000e-02
   1.0060000e-02
   8.6180000e-02
  -1.0197000e-01
  -2.4980000e-02
   6.4430000e-02
  -1.7550000e-02
   1.1380000e-02
  -2.7450000e-02
   5.5380000e-02
  -2.2430000e-02
  -8.3430000e-02
   1.6730000e-02
   4.2740000e-02
   1.4500000e-02
  -6.7480000e-02
   2.3440000e-02
   9.9500000e-02
  -6.5450000e-02
   2.0780000e-02
   2.8020000e-02
   7.0330000e-02
  -9.4130000e-02
  -1.0093000e-01
   1.7427000e-01
  -8.0340000e-02
  -9.9800000e-02
   1.1485000e-01
  -4.2440000e-02
   2.7120000e-02
  -1.7030000e-02
  -1.9580000e-02
   1.1206000e-01
  -9.1710000e-02
  -3.8690000e-02
   4.1430000e-02
  -6.6240000e-02
  -4.9900000e-03
  -4.9740000e-02
  -4.6610000e-02
   2.9860000e-02
   2.9100000e-03
  -2.3140000e-02
   8.5820000e-02
  -1.2860000e-02
  -2.1850000e-02
   2.1770000e-02
   9.8900000e-02
  -1.3020000e-02
  -6.2980000e-02
  -2.2700000e-02
   5.3550000e-02
   2.1410000e-02
  -8.9400000e-03
  -1.4230000e-02
   1.3136000e-01
  -1.1540000e-02
  -8.3650000e-02
   1.0276000e-01
   1.4120000e-02
  -9.0180000e-02
   4.5500000e-03
   9.5660000e-02
  -6.4080000e-02
  -7.8580000e-02
   1.7740000e-02
   1.3350000e-02
  -4.2770000e-02
  -7.3700000e-02
  -1.8400000e-03
   2.2670000e-02
   1.9660000e-02
  -6.7720000e-02
  -1.5770000e-02
   5.6700000e-02
   5.1880000e-02
  -3.7810000e-02
  -2.4900000e-02
   5.8540000e-02
  -2.1080000e-02
  -1.5960000e-02
  -1.6260000e-02
   4.7100000e-02
   8.6040000e-02
  -7.2850000e-02
  -1.3330000e-02
   6.4820000e-02
  -1.4940000e-02
   8.5500000e-03
  -1.4090000e-02
   2.9340000e-02
   2.1580000e-02
  -9.2730000e-02
  -2.3830000e-02
  -7.6800000e-03
  -4.1590000e-02
  -1.8780000e-02
  -4.4340000e-02
   1.3190000e-02
  -3.1010000e-02
  -2.2210000e-02
  -2.2430000e-02
   1.1052000e-01
   6.1060000e-02
   3.9210000e-02
  -1.5330000e-02
   3.0710000e-02
   3.5450000e-02
   6.1720000e-02
  -6.9340000e-02
  -4.4090000e-02
   2.5000000e-03
  -1.1840000e-02
   3.4080000e-02
  -2.9450000e-02
  -2.5910000e-02
  -4.9600000e-03
   1.0356000e-01
  -9.2210000e-02
  -1.3200000e-03
   8.3520000e-02
   8.9960000e-02
   2.5750000e-02
  -8.4800000e-02
   5.7900000e-03
   8.4420000e-02
  -7.1150000e-02
  -3.7970000e-02
   5.8890000e-02
   6.0000000e-03
  -7.8280000e-02
  -1.3065000e-01
   3.1120000e-02
  -6.3900000e-03
  -4.8450000e-02
  -9.5280000e-02
  -1.6040000e-02
   1.2390000e-02
  -3.6550000e-02
   1.1050000e-02
   5.6760000e-02
  -2.7690000e-02
  -3.0200000e-03
   7.4910000e-02
   1.6260000e-02
   5.0150000e-02
  -2.2130000e-02
   2.1880000e-02
   1.1913000e-01
  -1.1974000e-01
  -3.1500000e-02
   1.3059000e-01
  -1.0560000e-02
  -4.5600000e-02
  -4.0770000e-02
   4.9490000e-02
   7.9500000e-03
  -7.8800000e-02
   1.9800000e-02
   1.2264000e-01
  -5.6670000e-02
  -7.8030000e-02
   1.9250000e-01
  -1.4610000e-02
  -1.5980000e-02
  -8.9250000e-02
  -3.0760000e-02
   6.5450000e-02
  -1.5450000e-01
  -5.8370000e-02
   4.8970000e-02
  -6.9260000e-02
  -5.3680000e-02
  -1.9410000e-02
   5.8950000e-02
  -5.7000000e-03
  -1.5240000e-02
   9.8290000e-02
  -3.2710000e-02
   1.8290000e-02
   5.9030000e-02
  -6.5890000e-02
   5.6070000e-02
   8.8200000e-02
  -8.2940000e-02
   4.0800000e-02
   9.2040000e-02
   5.6890000e-02
  -4.6910000e-02
   4.8530000e-02
  -3.4300000e-03
  -1.5660000e-02
  -9.7610000e-02
  -5.8260000e-02
   5.9550000e-02
  -3.7920000e-02
  -4.0030000e-02
  -5.5770000e-02
   3.2460000e-02
  -1.4280000e-02
   1.2670000e-02
  -5.1110000e-02
   2.5170000e-02
   4.4280000e-02
  -4.6140000e-02
  -3.0790000e-02
   8.4400000e-03
   4.2800000e-02
  -2.5660000e-02
   3.6630000e-02
   4.8230000e-02
   6.9000000e-04
  -4.1040000e-02
   1.9660000e-02
   5.6970000e-02
  -4.7130000e-02
   5.1300000e-03
  -5.4700000e-02
   1.2659000e-01
  -3.2630000e-02
  -1.0276000e-01
   1.2917000e-01
   6.5090000e-02
  -4.8970000e-02
  -8.0250000e-02
   8.1650000e-02
   4.2770000e-02
  -2.5140000e-02
  -8.5760000e-02
  -3.1340000e-02
   3.2160000e-02
  -3.1310000e-02
   1.3790000e-02
   1.1650000e-02
   1.8100000e-03
  -5.9940000e-02
  -5.3740000e-02
  -5.4800000e-03
  -5.7900000e-03
   2.4700000e-02
  -4.1180000e-02
   5.0640000e-02
   1.1968000e-01
  -8.4700000e-03
  -7.5560000e-02
   1.0169000e-01
   1.2201000e-01
  -1.3698000e-01
  -4.6140000e-02
   8.9300000e-02
  -4.1540000e-02
  -7.7180000e-02
  -1.2640000e-02
   2.3830000e-02
   2.6460000e-02
  -1.1198000e-01
   4.9350000e-02
   9.8650000e-02
  -1.0019000e-01
  -2.7530000e-02
   1.1600000e-02
   5.8370000e-02
  -7.6690000e-02
   3.4710000e-02
   2.8760000e-02
  -1.0750000e-02
   1.3240000e-02
  -4.1700000e-03
   9.5940000e-02
   1.8810000e-02
  -7.2270000e-02
  -1.6560000e-02
   5.0260000e-02
  -2.6240000e-02
  -1.2187000e-01
   7.0960000e-02
   1.8560000e-02
  -1.0945000e-01
  -5.0150000e-02
   6.6110000e-02
   4.7840000e-02
  -3.5780000e-02
  -1.1540000e-02
   1.1060000e-01
   2.6900000e-03
   3.5810000e-02
  -5.1570000e-02
   1.3400000e-03
   2.9780000e-02
  -1.1840000e-02
  -6.7890000e-02
  -9.9500000e-03
   1.4500000e-02
   3.5620000e-02
  -3.2080000e-02
   4.1040000e-02
  -5.3030000e-02
  -1.0500000e-02
   7.6500000e-03
  -1.9190000e-02
   5.8540000e-02
  -9.0010000e-02
   5.3710000e-02
   2.1390000e-02
  -5.5660000e-02
   4.8830000e-02
   5.9610000e-02
   3.2900000e-02
  -1.1080000e-01
  -4.8970000e-02
   4.9960000e-02
   3.0400000e-03
  -2.7450000e-02
   4.0410000e-02
  -1.3870000e-02
  -1.2370000e-02
   1.1900000e-02
  -6.2790000e-02
   7.0460000e-02
  -8.9700000e-03
  -2.3000000e-02
   4.4940000e-02
   2.9200000e-02
  -1.8670000e-02
  -4.8640000e-02
  -1.1190000e-02
   8.2360000e-02
  -2.7940000e-02
  -2.3940000e-02
  -2.5660000e-02
   3.6820000e-02
   9.9000000e-03
  -4.3490000e-02
  -1.1950000e-02
  -1.8510000e-02
   2.1610000e-02
  -4.1130000e-02
  -8.2000000e-03
   6.0680000e-02
  -5.8700000e-02
  -4.1480000e-02
   3.7560000e-02
  -3.4190000e-02
   7.0160000e-02
   3.2660000e-02
  -1.7550000e-02
  -3.3150000e-02
  -3.2660000e-02
   6.6320000e-02
   1.2600000e-03
   4.8230000e-02
  -7.3510000e-02
  -5.2230000e-02
   3.6190000e-02
   1.7850000e-02
  -3.4710000e-02
   2.1000000e-02
   1.2064000e-01
   3.9950000e-02
  -5.5060000e-02
  -1.0690000e-02
   6.9260000e-02
   6.9640000e-02
  -1.0109000e-01
  -1.0610000e-02
   7.0000000e-02
  -1.3841000e-01
  -5.1570000e-02
  -1.6510000e-02
   2.1080000e-02
  -1.4920000e-02
  -4.2200000e-02
   6.8800000e-03
   4.4830000e-02
  -6.2870000e-02
   8.9100000e-03
   3.6470000e-02
   5.3740000e-02
   3.6500000e-03
  -3.6820000e-02
   2.1580000e-02
   6.1470000e-02
  -6.0760000e-02
  -3.9180000e-02
   1.0485000e-01
  -1.3190000e-02
   7.5400000e-03
  -2.4650000e-02
   1.0230000e-02
  -1.1650000e-02
   2.7800000e-02
  -3.9130000e-02
  -9.9000000e-04
   2.8930000e-02
  -2.9800000e-02
   2.4370000e-02
  -5.8260000e-02
   1.0989000e-01
   2.7880000e-02
  -1.2703000e-01
   2.6510000e-02
  -7.1300000e-03
  -2.7280000e-02
  -7.6610000e-02
  -1.7740000e-02
   6.8520000e-02
  -3.0080000e-02
   3.3700000e-02
   6.2950000e-02
  -5.2900000e-03
   1.4120000e-02
  -8.9770000e-02
   3.6630000e-02
   7.5040000e-02
  -1.7580000e-02
  -1.0400000e-03
  -1.0298000e-01
   5.9310000e-02
  -2.0120000e-02
  -5.1770000e-02
   1.6530000e-02
   4.0990000e-02
   1.3194000e-01
  -9.4510000e-02
   1.2480000e-02
   8.4970000e-02
  -1.9660000e-02
  -9.9690000e-02
   3.0710000e-02
   4.6390000e-02
  -3.9560000e-02
  -8.4560000e-02
   1.7000000e-03
   3.9400000e-02
   2.9860000e-02
  -7.3650000e-02
   7.6200000e-03
   6.0920000e-02
  -5.8430000e-02
  -4.4250000e-02
  -7.5700000e-03
  -1.7000000e-02
   3.0570000e-02
   4.1350000e-02
  -2.5690000e-02
   7.2140000e-02
  -1.1636000e-01
   5.7990000e-02
  -1.4830000e-02
  -3.2790000e-02
  -5.0810000e-02
  -2.1630000e-02
   2.3280000e-02
   2.5860000e-02
  -1.6310000e-02
   6.6870000e-02
   1.2426000e-01
  -8.6560000e-02
   2.0810000e-02
   1.0795000e-01
   4.5950000e-02
  -6.9200000e-02
  -1.4530000e-02
   4.8860000e-02
   7.7000000e-04
  -3.4740000e-02
  -1.6730000e-02
  -1.8890000e-02
  -4.0390000e-02
  -3.7560000e-02
  -2.2590000e-02
   3.7860000e-02
  -1.1145000e-01
  -4.7520000e-02
   9.1250000e-02
   2.9670000e-02
  -6.1750000e-02
   6.0210000e-02
   3.8140000e-02
  -9.3200000e-03
  -6.6210000e-02
   4.1320000e-02
   2.1390000e-02
  -9.6920000e-02
   1.0120000e-02
   2.2890000e-02
   3.9130000e-02
  -7.6000000e-02
   3.3200000e-02
   8.3410000e-02
   2.5500000e-02
   1.6420000e-02
  -5.8590000e-02
   1.6780000e-02
   3.0870000e-02
  -1.1080000e-02
  -4.6900000e-03
  -1.9710000e-02
  -1.7380000e-02
  -3.5810000e-02
   7.7590000e-02
   1.4590000e-02
  -4.1900000e-03
  -4.7760000e-02
  -1.6890000e-02
  -1.7790000e-02
  -4.0330000e-02
  -7.4660000e-02
   3.4160000e-02
   4.8800000e-03
  -3.5340000e-02
   2.7560000e-02
   3.1500000e-02
  -1.3220000e-02
   3.5100000e-02
   4.0880000e-02
  -3.3700000e-03
   2.4870000e-02
   1.4700000e-02
   2.4370000e-02
  -6.6130000e-02
  -2.5800000e-03
   2.8080000e-02
  -1.2580000e-02
  -5.7800000e-02
   2.0590000e-02
   7.2470000e-02
  -1.8670000e-02
  -5.3850000e-02
  -2.9890000e-02
   8.8120000e-02
   3.7040000e-02
  -2.2620000e-02
  -5.3680000e-02
   4.8390000e-02
   8.5600000e-02
  -4.5710000e-02
   4.7980000e-02
   3.9480000e-02
  -7.6220000e-02
   2.7400000e-03
   3.9920000e-02
  -8.6310000e-02
   1.8210000e-02
  -7.5950000e-02
  -5.7250000e-02
   3.4080000e-02
  -5.2090000e-02
  -2.2650000e-02
   7.1640000e-02
  -7.5700000e-03
  -4.0940000e-02
  -2.0670000e-02
   2.8710000e-02
   7.6550000e-02
  -1.1804000e-01
  -2.2650000e-02
   5.3110000e-02
   7.4470000e-02
  -1.2530000e-02
   3.6710000e-02
   5.3900000e-02
  -2.3300000e-03
  -1.3600000e-02
  -6.1400000e-03
   2.3740000e-02
  -1.7080000e-02
  -1.2060000e-02
   3.1200000e-02
  -1.3430000e-02
  -6.3830000e-02
  -8.2010000e-02
   8.7080000e-02
   3.0960000e-02
  -4.2580000e-02
   4.9980000e-02
   5.2070000e-02
  -1.1130000e-02
  -7.3860000e-02
  -5.2000000e-04
   3.8280000e-02
   1.4890000e-02
  -5.8430000e-02
   2.3910000e-02
   9.7090000e-02
  -2.4400000e-02
  -6.9100000e-03
  -2.5960000e-02
   4.6910000e-02
  -4.3510000e-02
  -6.3470000e-02
   1.6310000e-02
  -2.5990000e-02
  -2.1740000e-02
   1.5440000e-02
  -1.1380000e-02
  -1.5900000e-02
   6.9970000e-02
  -1.2780000e-02
  -8.5190000e-02
   3.6080000e-02
   8.8810000e-02
  -2.1470000e-02
  -1.1760000e-02
   1.4780000e-02
  -1.4200000e-02
  -5.4370000e-02
   1.6510000e-02
  -8.1200000e-03
   3.2100000e-03
  -6.3690000e-02
   5.7110000e-02
  -2.0430000e-02
  -1.7470000e-02
   3.9320000e-02
  -1.8420000e-02
   3.0630000e-02
   2.3660000e-02
  -4.8580000e-02
   6.5260000e-02
   5.0400000e-03
   4.9000000e-04
  -7.5620000e-02
   5.0780000e-02
  -9.1330000e-02
  -2.5580000e-02
   7.2600000e-02
  -8.4450000e-02
  -1.6420000e-02
   2.5000000e-03
   9.6540000e-02
  -9.0800000e-03
  -7.7210000e-02
   1.2108000e-01
  -4.1400000e-03
  -6.4710000e-02
  -5.2370000e-02
   1.2069000e-01
   1.1570000e-01
  -1.0482000e-01
  -2.1440000e-02
   3.7950000e-02
   1.0317000e-01
  -9.6430000e-02
  -8.7460000e-02
   9.5830000e-02
   5.5140000e-02
  -1.0359000e-01
  -1.1960000e-01
   9.7660000e-02
   1.1357000e-01
  -2.1553000e-01
  -2.2920000e-02
   1.2453000e-01
  -2.0230000e-02
  -9.8350000e-02
  -4.4830000e-02
   8.8230000e-02
  -5.6890000e-02
  -9.4290000e-02
   1.2120000e-02
  -2.1140000e-02
   4.4140000e-02
   9.2020000e-02
  -2.1300000e-02
   8.1160000e-02
   2.8840000e-02
  -3.6440000e-02
   3.9350000e-02
  -8.6900000e-03
   9.0500000e-03
  -2.2650000e-02
   1.2940000e-02
  -6.1250000e-02
  -1.4810000e-02
   9.2810000e-02
  -6.1750000e-02
   1.4860000e-02
   2.1030000e-02
   8.9960000e-02
  -9.9800000e-03
  -1.0487000e-01
   9.0210000e-02
   1.2289000e-01
  -6.8850000e-02
  -4.8230000e-02
  -1.6400000e-02
   7.5240000e-02
  -1.5834000e-01
  -2.3060000e-02
   7.1840000e-02
  -3.4250000e-02
  -6.4320000e-02
  -3.4880000e-02
   1.1669000e-01
  -7.2700000e-03
  -8.4150000e-02
   5.4480000e-02
   8.1020000e-02
  -2.7060000e-02
  -4.7240000e-02
  -1.5900000e-03
   1.0320000e-01
   6.1420000e-02
  -2.0043000e-01
   3.1590000e-02
   1.1250000e-01
  -7.5700000e-02
  -1.2264000e-01
   1.8450000e-02
   4.7190000e-02
   1.3850000e-02
  -6.1120000e-02
   3.0710000e-02
   4.7270000e-02
   4.5430000e-02
  -5.1800000e-03
   2.5390000e-02
   8.4610000e-02
  -7.5730000e-02
   9.3800000e-03
   3.7890000e-02
  -1.3130000e-02
  -3.9620000e-02
   5.2600000e-03
   1.0282000e-01
  -7.9130000e-02
  -1.2113000e-01
   4.1210000e-02
   8.7930000e-02
  -6.3030000e-02
  -1.2777000e-01
   9.5910000e-02
  -1.4970000e-02
  -4.7730000e-02
   6.1390000e-02
   6.4400000e-03
   3.5840000e-02
  -3.8000000e-02
   7.7600000e-03
  -1.0720000e-02
  -9.2840000e-02
   2.7860000e-02
   2.0120000e-02
  -6.1420000e-02
  -5.1240000e-02
   4.3290000e-02
   8.8560000e-02
  -2.5310000e-02
  -9.8180000e-02
   4.5760000e-02
   5.1880000e-02
   4.3460000e-02
   5.1800000e-03
   5.4320000e-02
   6.5750000e-02
  -7.9160000e-02
  -1.6640000e-02
  -3.2440000e-02
   8.4260000e-02
  -1.5550000e-02
  -6.9920000e-02
  -3.4330000e-02
   2.5660000e-02
  -4.4550000e-02
  -2.8190000e-02
   2.4540000e-02
   2.4540000e-02
  -1.2970000e-02
  -2.4480000e-02
   4.4910000e-02
   4.3180000e-02
   1.0090000e-02
  -6.7480000e-02
   3.6160000e-02
  -2.5280000e-02
  -8.6900000e-03
   2.3740000e-02
   7.8090000e-02
   2.7450000e-02
  -9.3220000e-02
   4.4230000e-02
  -2.0780000e-02
   7.2710000e-02
  -6.8930000e-02
  -1.3930000e-02
   5.2640000e-02
  -1.5030000e-02
  -2.1330000e-02
  -8.1350000e-02
   5.8590000e-02
   3.4490000e-02
  -7.1310000e-02
  -2.2620000e-02
  -1.9250000e-02
   1.5820000e-02
  -3.5920000e-02
  -6.0240000e-02
   5.1110000e-02
  -8.6900000e-03
   1.7580000e-02
  -4.2220000e-02
   8.3730000e-02
   4.8480000e-02
  -7.2960000e-02
  -8.0900000e-03
   6.6210000e-02
   3.1260000e-02
  -8.8510000e-02
   2.1580000e-02
   3.1640000e-02
  -4.9900000e-02
  -3.0570000e-02
   4.7320000e-02
  -3.0130000e-02
  -2.2950000e-02
   6.4200000e-03
   6.0900000e-03
   2.0700000e-02
  -2.8730000e-02
  -8.9900000e-03
   4.6390000e-02
  -2.5880000e-02
  -8.2300000e-03
  -6.3600000e-03
  -2.5550000e-02
   9.9970000e-02
  -2.8160000e-02
  -7.3480000e-02
   4.0500000e-02
  -5.4370000e-02
  -1.5440000e-02
   1.6590000e-02
  -2.4160000e-02
  -2.9670000e-02
   2.2800000e-03
   1.1490000e-02
  -3.2100000e-03
   6.3010000e-02
  -2.5660000e-02
   5.9720000e-02
   8.0750000e-02
  -2.5280000e-02
  -5.0700000e-03
   3.2100000e-03
  -1.8100000e-03
  -5.6730000e-02
   2.5500000e-03
   4.4400000e-03
   3.6200000e-03
  -1.7580000e-02
  -2.2800000e-03
   3.6550000e-02
  -1.7330000e-02
   1.4750000e-02
  -3.1500000e-02
   1.8120000e-02
   2.1170000e-02
  -1.1350000e-02
   1.4800000e-03
   1.9000000e-02
  -7.1750000e-02
   9.7140000e-02
   2.7420000e-02
  -1.3040000e-01
  -2.4810000e-02
   3.0110000e-02
   9.0750000e-02
  -1.1823000e-01
  -5.0810000e-02
   8.8730000e-02
  -2.1300000e-02
  -8.5430000e-02
   5.6840000e-02
   7.9430000e-02
  -5.0480000e-02
   2.0810000e-02
  -3.3700000e-03
   6.2240000e-02
  -6.7480000e-02
  -6.9530000e-02
   4.1790000e-02
  -3.4380000e-02
   5.0370000e-02
  -7.1120000e-02
   2.5940000e-02
   5.1900000e-02
  -3.4270000e-02
  -4.6780000e-02
   4.3900000e-03
   2.6320000e-02
  -2.6680000e-02
   4.3180000e-02
  -1.1080000e-02
  -2.5580000e-02
   3.7800000e-03
   8.5790000e-02
  -3.2820000e-02
   4.1570000e-02
   5.0390000e-02
  -5.5520000e-02
   6.4870000e-02
   7.3500000e-03
   2.6180000e-02
  -4.9740000e-02
   2.0890000e-02
  -9.7300000e-03
  -1.0131000e-01
   2.8800000e-03
  -2.2570000e-02
   2.4950000e-02
  -3.0050000e-02
  -5.7110000e-02
   6.1420000e-02
  -4.9080000e-02
  -1.0175000e-01
   4.3900000e-02
   7.8850000e-02
  -6.9400000e-03
  -1.1532000e-01
  -2.8190000e-02
   9.0750000e-02
  -7.0820000e-02
  -1.2600000e-03
  -7.5400000e-03
   4.6830000e-02
   2.1800000e-02
  -3.1940000e-02
   3.1700000e-02
   8.5000000e-02
  -3.3000000e-04
  -2.8020000e-02
   9.5630000e-02
   6.5060000e-02
  -6.5200000e-02
   6.3100000e-03
  -1.0420000e-02
   1.6200000e-02
  -3.6500000e-03
  -6.8520000e-02
  -1.3820000e-02
  -2.0120000e-02
  -3.7150000e-02
  -4.0360000e-02
   7.0030000e-02
   3.5450000e-02
  -1.2890000e-02
  -5.9200000e-02
   6.7390000e-02
   2.6710000e-02
  -2.3660000e-02
   2.1630000e-02
  -3.6030000e-02
  -3.1010000e-02
  -2.8160000e-02
   2.4510000e-02
  -3.3530000e-02
  -2.9830000e-02
  -3.4630000e-02
  -2.8870000e-02
   6.3120000e-02
   1.6400000e-02
   1.0250000e-02
   2.8760000e-02
  -1.8010000e-02
   1.3870000e-02
  -8.1600000e-02
   1.7190000e-02
   7.4600000e-03
   3.1310000e-02
   4.5000000e-03
  -7.6060000e-02
   6.8960000e-02
   1.3514000e-01
  -4.7020000e-02
   1.5460000e-02
  -2.9100000e-03
  -4.7820000e-02
  -1.8370000e-02
   9.4600000e-03
  -5.1300000e-03
  -3.8060000e-02
   2.1690000e-02
   8.5800000e-03
  -3.6030000e-02
   2.0620000e-02
   4.2440000e-02
  -5.3050000e-02
  -1.0360000e-02
   6.6000000e-04
  -1.6200000e-03
  -3.1940000e-02
  -2.7280000e-02
   8.6230000e-02
  -8.1900000e-02
  -5.1300000e-02
  -1.8480000e-02
   5.1850000e-02
   6.2900000e-02
  -1.2292000e-01
   1.9690000e-02
   1.0340000e-02
  -2.7910000e-02
   2.7340000e-02
  -7.7000000e-03
   3.8960000e-02
  -1.5190000e-02
   2.5390000e-02
  -4.2500000e-03
   8.6670000e-02
  -4.5500000e-03
  -6.0570000e-02
   4.4000000e-04
   5.5990000e-02
   2.2260000e-02
  -2.6320000e-02
   6.9290000e-02
  -4.0610000e-02
   1.9270000e-02
  -2.8540000e-02
  -7.1530000e-02
   8.9470000e-02
  -2.7360000e-02
  -5.5660000e-02
  -6.2200000e-03
   3.7950000e-02
   1.1650000e-02
  -1.0391000e-01
  -4.1840000e-02
   2.4460000e-02
  -1.4480000e-02
   8.2170000e-02
  -4.3650000e-02
   2.5060000e-02
  -2.3110000e-02
  -4.7840000e-02
   1.1240000e-02
  -3.6990000e-02
   5.9720000e-02
   5.6320000e-02
  -1.7410000e-02
  -2.7880000e-02
   5.2810000e-02
  -7.5980000e-02
   7.5100000e-03
   6.6680000e-02
  -2.7830000e-02
   5.4750000e-02
  -1.7740000e-02
   7.7680000e-02
   1.0700000e-03
  -1.4798000e-01
  -1.2500000e-02
   9.6320000e-02
   4.3430000e-02
  -2.1268000e-01
   3.8550000e-02
   7.8170000e-02
  -4.4770000e-02
  -2.8320000e-02
  -2.2620000e-02
   1.0112000e-01
  -5.2750000e-02
  -4.9630000e-02
   5.3990000e-02
  -1.4340000e-02
   6.0160000e-02
  -7.5510000e-02
   1.5270000e-02
   2.7140000e-02
  -8.3600000e-03
   5.2200000e-02
  -5.7910000e-02
   8.3870000e-02
  -5.1710000e-02
  -6.9530000e-02
   6.5010000e-02
   4.2170000e-02
   6.8660000e-02
  -1.1143000e-01
   5.3600000e-02
   1.2799000e-01
  -7.8940000e-02
  -3.9150000e-02
   6.0600000e-03
   3.1170000e-02
  -8.6720000e-02
  -2.7280000e-02
   8.2470000e-02
   2.5000000e-03
  -1.7018000e-01
  -8.5300000e-03
   1.2261000e-01
  -5.7360000e-02
  -1.4285000e-01
   8.0060000e-02
   1.2856000e-01
  -8.3410000e-02
  -6.6870000e-02
   2.9830000e-02
   2.2590000e-02
  -1.0360000e-02
  -8.7630000e-02
   7.6740000e-02
   8.4530000e-02
  -5.0700000e-03
  -1.0671000e-01
   2.6540000e-02
   1.3213000e-01
  -8.6860000e-02
  -3.2110000e-02
   5.8920000e-02
   9.7830000e-02
  -8.3190000e-02
  -6.7090000e-02
   7.9570000e-02
   3.6360000e-02
  -8.7410000e-02
   2.3360000e-02
   1.0646000e-01
   3.0210000e-02
  -9.6320000e-02
  -2.7750000e-02
   6.6130000e-02
  -4.4000000e-04
  -1.0150000e-01
   1.3700000e-03
   1.0381000e-01
  -1.2260000e-02
  -1.0816000e-01
  -6.8160000e-02
   1.0246000e-01
   1.4670000e-02
  -1.0646000e-01
   2.4270000e-02
  -1.3050000e-02
   1.3680000e-02
  -7.2490000e-02
   1.8860000e-02
   4.3130000e-02
  -5.9060000e-02
   1.7250000e-02
   4.1290000e-02
  -9.4000000e-03
   4.8500000e-03
   3.2080000e-02
   1.4310000e-02
  -1.8970000e-02
   1.9500000e-03
   4.1840000e-02
  -1.5130000e-02
  -8.7740000e-02
  -2.9340000e-02
   1.0970000e-02
   8.7000000e-02
   8.0600000e-03
  -6.8220000e-02
   7.0270000e-02
   4.8910000e-02
  -7.6880000e-02
  -5.8840000e-02
   5.9440000e-02
  -1.8400000e-02
  -5.2620000e-02
   5.0640000e-02
   8.7850000e-02
  -6.2710000e-02
  -2.5500000e-02
   1.0530000e-02
  -2.1190000e-02
  -1.8340000e-02
  -1.5270000e-02
   4.7400000e-03
   3.5180000e-02
  -2.6840000e-02
  -1.1891000e-01
  -6.4650000e-02
   1.3081000e-01
  -2.5060000e-02
  -2.3110000e-02
   7.7840000e-02
  -3.8880000e-02
   2.3310000e-02
   2.3740000e-02
  -4.1430000e-02
   7.3650000e-02
   1.7740000e-02
   3.4990000e-02
   2.4510000e-02
  -3.6330000e-02
  -2.2700000e-02
   1.3330000e-02
  -7.4330000e-02
   3.3640000e-02
  -6.6650000e-02
  -3.4600000e-02
   4.5020000e-02
   1.6310000e-02
   2.2210000e-02
  -2.6490000e-02
   7.5180000e-02
   7.5540000e-02
  -9.4480000e-02
  -3.1340000e-02
   7.9570000e-02
   2.4920000e-02
  -1.9200000e-03
  -8.1050000e-02
  -4.5430000e-02
   6.5800000e-03
   1.7410000e-02
  -2.3110000e-02
  -4.9680000e-02
  -5.7390000e-02
   8.7350000e-02
   5.4450000e-02
  -1.9690000e-02
   8.8300000e-03
   8.0660000e-02
   6.1390000e-02
  -1.0304000e-01
  -4.3300000e-03
   4.2030000e-02
   5.5490000e-02
  -2.6160000e-02
  -8.0970000e-02
   3.5730000e-02
   1.7140000e-02
  -5.9520000e-02
  -7.5400000e-02
  -2.9530000e-02
  -5.0890000e-02
  -6.5360000e-02
   4.7350000e-02
   2.0100000e-02
  -1.4940000e-02
   6.5500000e-03
   4.0900000e-03
   9.7330000e-02
  -2.8200000e-03
  -5.6890000e-02
   5.8430000e-02
  -3.5340000e-02
   3.2930000e-02
   1.8180000e-02
  -4.2580000e-02
   8.6150000e-02
  -1.5160000e-02
  -1.4211000e-01
   5.5930000e-02
   5.4230000e-02
  -1.4340000e-02
  -1.0334000e-01
   3.0680000e-02
   5.8040000e-02
  -2.0320000e-02
   2.9500000e-02
  -8.5460000e-02
   1.1143000e-01
   3.8300000e-02
  -2.9970000e-02
   1.7770000e-02
  -8.0280000e-02
   5.1800000e-03
  -2.5250000e-02
  -3.2980000e-02
  -3.1780000e-02
  -5.3250000e-02
   4.1730000e-02
  -3.8580000e-02
  -6.2810000e-02
   7.8250000e-02
   1.5190000e-02
  -2.0780000e-02
   4.8200000e-02
   8.9580000e-02
   1.2100000e-03
   4.4700000e-03
  -1.6920000e-02
   9.1520000e-02
   5.1900000e-02
  -1.0490000e-01
  -2.2620000e-02
   2.5640000e-02
   4.8060000e-02
  -1.0967000e-01
  -9.4000000e-03
   3.9620000e-02
   2.8680000e-02
  -4.2440000e-02
  -1.9580000e-02
   1.1209000e-01
  -3.9650000e-02
  -5.9220000e-02
  -3.2240000e-02
   2.5280000e-02
  -3.9840000e-02
  -8.3980000e-02
  -5.9800000e-03
   7.6550000e-02
  -3.7670000e-02
  -6.4130000e-02
   9.7300000e-03
   6.6000000e-02
  -2.5000000e-03
  -8.3730000e-02
   7.6630000e-02
   5.0340000e-02
  -4.1980000e-02
   5.3050000e-02
   5.9850000e-02
   6.3120000e-02
   6.8660000e-02
  -7.7840000e-02
  -6.1800000e-02
   1.1126000e-01
  -4.6580000e-02
  -5.8900000e-03
   4.0900000e-03
  -2.0560000e-02
   6.4710000e-02
  -1.2259000e-01
   2.9970000e-02
  -1.9990000e-02
  -4.3240000e-02
   5.4950000e-02
   3.0710000e-02
  -9.4400000e-02
  -6.0950000e-02
   6.4790000e-02
   1.3240000e-02
  -2.8270000e-02
   4.8450000e-02
   7.2100000e-03
  -2.1100000e-03
  -4.5430000e-02
   7.3800000e-03
  -5.0940000e-02
  -2.4790000e-02
   2.5860000e-02
  -7.2410000e-02
   6.2760000e-02
   5.2260000e-02
  -3.9890000e-02
   5.0970000e-02
  -2.5580000e-02
   5.6970000e-02
   9.6500000e-03
  -1.2040000e-02
   2.4130000e-02
  -3.3700000e-03
  -1.8920000e-02
   1.5160000e-02
  -1.5080000e-02
   5.4260000e-02
  -3.5310000e-02
  -1.5380000e-02
   2.9120000e-02
  -1.8100000e-02
  -5.2310000e-02
  -1.8860000e-02
   5.1160000e-02
  -1.1210000e-02
  -4.6580000e-02
   3.6000000e-02
  -2.1400000e-03
  -2.1660000e-02
   5.2070000e-02
   6.2000000e-03
   4.8690000e-02
  -5.9220000e-02
   7.2100000e-03
   2.7010000e-02
  -2.0540000e-02
  -1.5770000e-02
  -6.6210000e-02
   1.0690000e-01
  -8.4260000e-02
  -3.2710000e-02
   2.8160000e-02
   2.7390000e-02
  -6.7200000e-02
  -1.7410000e-02
   9.6180000e-02
  -1.8640000e-02
  -3.3340000e-02
  -5.1460000e-02
   1.6218000e-01
   8.2970000e-02
  -1.4784000e-01
   5.1660000e-02
   1.3650000e-02
  -5.5900000e-03
  -4.1350000e-02
  -2.4920000e-02
  -1.1950000e-02
   9.5100000e-03
   1.4010000e-02
  -3.7810000e-02
   6.5000000e-03
  -1.1240000e-02
  -1.1840000e-02
  -1.7470000e-02
  -1.4230000e-02
   3.8930000e-02
   1.0531000e-01
  -3.4160000e-02
  -3.7000000e-03
   1.3570000e-02
   3.6490000e-02
  -6.1100000e-03
   1.1350000e-02
  -1.0800000e-02
  -1.1540000e-02
  -2.5580000e-02
  -3.9950000e-02
  -7.6720000e-02
   2.8460000e-02
   5.2040000e-02
  -4.5430000e-02
   3.0700000e-03
   2.2100000e-02
   9.2230000e-02
   3.0870000e-02
  -5.7930000e-02
  -1.0780000e-02
   1.2459000e-01
   1.7880000e-02
  -1.0049000e-01
   2.1700000e-03
   9.5940000e-02
  -4.1620000e-02
  -1.5683000e-01
   1.0455000e-01
   5.3850000e-02
  -1.3328000e-01
  -7.8140000e-02
   8.9300000e-02
   1.9200000e-03
  -1.2590000e-01
  -7.0990000e-02
   8.3710000e-02
  -1.6120000e-02
   7.7000000e-04
  -7.8000000e-02
   3.6800000e-02
   4.7540000e-02
  -3.2410000e-02
  -1.5600000e-03
   1.3566000e-01
   4.4700000e-03
  -3.5450000e-02
   7.8960000e-02
   1.6010000e-02
   2.8410000e-02
  -4.9520000e-02
  -4.0330000e-02
   4.4170000e-02
  -5.3300000e-02
  -1.1900000e-02
  -2.0840000e-02
   2.2510000e-02
  -1.2640000e-02
   5.8370000e-02
  -6.3300000e-03
  -1.7930000e-02
  -3.2440000e-02
  -2.3470000e-02
   4.4120000e-02
  -2.2350000e-02
   4.4090000e-02
  -3.8580000e-02
  -1.7990000e-02
   9.9690000e-02
  -5.8760000e-02
   2.1630000e-02
  -5.4590000e-02
  -4.8420000e-02
  -1.9060000e-02
  -2.5660000e-02
   6.3120000e-02
   2.0400000e-02
  -5.5990000e-02
   1.2623000e-01
  -1.1270000e-02
  -3.6660000e-02
   5.2750000e-02
   6.4380000e-02
   5.5410000e-02
  -5.6210000e-02
  -1.2170000e-02
  -7.6940000e-02
  -1.7050000e-02
   6.0760000e-02
   1.3080000e-02
  -2.1850000e-02
  -8.8480000e-02
  -8.3100000e-03
   7.3800000e-03
  -5.5270000e-02
   1.2560000e-02
  -3.9890000e-02
   6.8160000e-02
   1.1800000e-03
  -1.4310000e-02
   4.7730000e-02
  -1.1490000e-02
  -7.8400000e-03
   4.8420000e-02
  -3.4790000e-02
  -1.8290000e-02
   1.2218000e-01
  -5.1850000e-02
  -5.3000000e-02
  -2.7140000e-02
   5.9550000e-02
   1.1244000e-01
  -7.5890000e-02
  -4.5730000e-02
   8.7220000e-02
  -2.5580000e-02
  -4.5490000e-02
  -5.6210000e-02
   8.3190000e-02
   2.5530000e-02
  -9.1690000e-02
   6.1140000e-02
  -2.2920000e-02
  -1.8340000e-02
  -4.1260000e-02
   1.3240000e-02
   1.4940000e-02
  -2.5800000e-03
   2.4700000e-03
  -2.0430000e-02
  -3.7230000e-02
  -3.7800000e-03
   2.5420000e-02
  -3.9650000e-02
   1.0910000e-02
  -2.4840000e-02
  -5.1300000e-03
   4.4750000e-02
  -6.9600000e-03
   4.3980000e-02
   1.5220000e-02
   1.0090000e-02
  -1.5930000e-02
   3.0520000e-02
   5.7030000e-02
  -3.8700000e-03
  -4.3290000e-02
  -2.6540000e-02
   1.0238000e-01
   4.3510000e-02
  -4.1400000e-02
  -6.7480000e-02
   3.8390000e-02
  -8.9100000e-03
  -9.3580000e-02
  -5.4950000e-02
   4.5790000e-02
   9.5100000e-03
  -1.1162000e-01
  -8.1400000e-03
   7.2600000e-02
  -8.0200000e-02
  -1.2600000e-03
   3.8190000e-02
  -4.8530000e-02
  -3.0000000e-04
  -5.0040000e-02
   9.9500000e-03
   1.0293000e-01
  -3.4000000e-03
   8.2800000e-03
   3.2050000e-02
   1.6420000e-02
   5.9470000e-02
  -1.9140000e-02
   3.2000000e-02
   8.5330000e-02
  -1.0959000e-01
   7.1040000e-02
   6.5280000e-02
   3.5600000e-03
  -5.6370000e-02
  -4.3400000e-02
   2.1770000e-02
   1.6530000e-02
  -8.8300000e-03
  -1.6330000e-01
   4.8340000e-02
   7.0080000e-02
  -1.6868000e-01
  -5.6340000e-02
   8.7300000e-02
   5.8650000e-02
  -1.8590000e-02
  -3.4030000e-02
   4.5080000e-02
  -5.4600000e-03
  -5.1790000e-02
  -1.3960000e-02
  -9.6290000e-02
  -1.4970000e-02
  -9.2370000e-02
   6.5800000e-02
  -4.6310000e-02
  -3.9070000e-02
   7.4250000e-02
   1.2970000e-02
   6.3500000e-02
  -1.1130000e-02
   6.3970000e-02
   1.1266000e-01
   3.0760000e-02
   1.5900000e-03
  -3.8000000e-02
   3.6110000e-02
   6.9100000e-03
  -2.4460000e-02
   4.5500000e-03
  -1.3490000e-02
   1.1980000e-02
  -5.9170000e-02
  -3.3830000e-02
  -5.2310000e-02
  -7.6800000e-03
  -1.3490000e-02
   6.5300000e-03
  -9.8700000e-03
  -6.5300000e-03
   2.2180000e-02
   4.4990000e-02
   4.3160000e-02
  -4.5650000e-02
  -4.8200000e-02
   3.0520000e-02
  -9.4900000e-03
  -3.1000000e-03
  -1.4590000e-02
   1.5160000e-02
   1.3820000e-02
  -4.4720000e-02
   3.6220000e-02
   4.7160000e-02
   4.8120000e-02
  -9.1580000e-02
   2.7500000e-02
   1.2505000e-01
  -8.2420000e-02
  -3.7590000e-02
  -1.8620000e-02
  -3.5290000e-02
   8.3570000e-02
  -7.6200000e-03
  -8.6900000e-03
   6.0840000e-02
  -6.4430000e-02
  -1.6340000e-02
   1.7800000e-03
  -4.0600000e-03
  -3.0000000e-04
  -6.6400000e-03
  -2.2700000e-02
  -5.9800000e-02
  -4.8530000e-02
   9.9300000e-03
   1.7169000e-01
  -1.0592000e-01
   1.0940000e-02
   3.4190000e-02
  -1.6620000e-02
  -2.2130000e-02
  -1.0115000e-01
   1.4480000e-02
   1.2193000e-01
  -2.9580000e-02
  -4.7460000e-02
   2.4270000e-02
   6.3660000e-02
   1.7160000e-02
  -9.3740000e-02
   3.8390000e-02
   2.7120000e-02
  -4.4310000e-02
   2.1800000e-02
  -7.4000000e-02
   1.1430000e-02
   5.8760000e-02
  -7.7950000e-02
   1.0433000e-01
  -2.4460000e-02
  -3.0650000e-02
   2.0590000e-02
   3.4080000e-02
  -3.1150000e-02
  -4.9050000e-02
   7.7600000e-03
   2.0920000e-02
   3.6000000e-04
   8.0000000e-05
   3.2410000e-02
   1.1145000e-01
  -6.1940000e-02
  -7.2960000e-02
  -8.6900000e-03
   4.1920000e-02
  -2.7690000e-02
  -5.2730000e-02
   3.8410000e-02
  -2.3720000e-02
  -1.6970000e-02
   2.2670000e-02
  -5.4600000e-03
  -2.8500000e-03
   3.8900000e-03
  -3.3780000e-02
   8.6590000e-02
  -8.9080000e-02
   4.2530000e-02
  -5.4300000e-03
  -7.4390000e-02
   6.4930000e-02
  -9.1710000e-02
   3.2440000e-02
  -7.0500000e-03
   3.0540000e-02
  -6.6600000e-03
   7.7000000e-03
   1.3050000e-02
  -1.6640000e-02
   3.0000000e-04
   1.3220000e-02
   4.3180000e-02
   8.0530000e-02
  -4.0580000e-02
   4.7700000e-03
   4.6670000e-02
  -1.3190000e-02
  -7.6060000e-02
  -4.7380000e-02
   4.2390000e-02
  -8.6100000e-03
  -2.9200000e-02
  -6.1990000e-02
  -5.2000000e-04
   9.4840000e-02
  -6.6680000e-02
  -1.1570000e-02
   1.0109000e-01
  -2.1280000e-02
   4.2110000e-02
  -9.4130000e-02
   5.4890000e-02
   6.0130000e-02
  -1.7663000e-01
   2.0150000e-02
  -2.7250000e-02
  -2.7340000e-02
  -8.7460000e-02
  -5.8100000e-03
   8.4090000e-02
   4.1920000e-02
  -1.6620000e-02
  -1.3630000e-02
   8.7570000e-02
   2.0260000e-02
  -3.6300000e-02
  -2.0260000e-02
   1.6070000e-02
   6.5800000e-03
  -2.2980000e-02
   8.1400000e-03
   1.2590000e-01
  -4.5760000e-02
  -9.7060000e-02
   1.0973000e-01
  -3.9290000e-02
  -5.3330000e-02
   5.2260000e-02
   2.8460000e-02
  -4.9900000e-02
   1.2500000e-02
   3.8000000e-02
  -1.3650000e-02
  -5.9800000e-03
   2.3880000e-02
  -3.5860000e-02
  -6.9560000e-02
   3.5510000e-02
  -9.4000000e-03
   3.1800000e-03
  -4.4090000e-02
   3.3500000e-03
  -5.4450000e-02
   2.6790000e-02
   6.5150000e-02
   1.0390000e-02
   6.1220000e-02
  -4.6610000e-02
  -7.2930000e-02
   3.8110000e-02
   4.4170000e-02
  -5.2920000e-02
  -2.5200000e-02
  -2.0370000e-02
   5.1680000e-02
   6.4680000e-02
  -9.6790000e-02
   4.7100000e-02
   6.8930000e-02
  -5.1500000e-03
  -1.6920000e-02
  -3.9210000e-02
   6.1200000e-02
   5.8700000e-03
  -6.2290000e-02
  -1.2370000e-02
  -7.2900000e-03
   8.3430000e-02
  -1.0021000e-01
  -5.4800000e-03
   4.8150000e-02
  -5.1050000e-02
  -3.4410000e-02
  -9.3220000e-02
   3.8030000e-02
   3.3010000e-02
   4.4100000e-03
  -4.4580000e-02
  -4.8340000e-02
   5.8620000e-02
  -1.7820000e-02
  -6.1400000e-03
   7.3950000e-02
  -1.9710000e-02
   6.9640000e-02
  -1.3700000e-03
  -1.7380000e-02
   2.5120000e-02
  -2.1220000e-02
   5.1030000e-02
   9.9500000e-03
   2.6980000e-02
  -4.5320000e-02
  -4.6100000e-03
   9.7720000e-02
  -5.6870000e-02
  -1.4970000e-02
   3.0400000e-03
  -4.4310000e-02
  -2.7990000e-02
  -2.1740000e-02
  -5.3470000e-02
   1.6260000e-02
   2.3880000e-02
  -1.3160000e-02
  -3.8550000e-02
   2.9690000e-02
  -1.2300000e-03
  -4.2550000e-02
   6.6000000e-04
   2.6100000e-02
   1.1790000e-02
  -6.7910000e-02
   1.2890000e-02
   4.9330000e-02
  -7.2080000e-02
  -3.5670000e-02
   6.5800000e-02
   1.1870000e-02
  -5.7390000e-02
   1.1320000e-02
   1.3885000e-01
  -8.9410000e-02
  -1.0060000e-02
   1.3657000e-01
  -5.5400000e-03
  -6.3280000e-02
  -1.6750000e-02
  -1.0450000e-02
   1.9990000e-02
  -4.1040000e-02
  -9.7100000e-03
  -8.9700000e-03
   2.7970000e-02
  -1.0890000e-02
  -3.8520000e-02
  -6.8300000e-03
  -6.3090000e-02
   8.3790000e-02
   2.0810000e-02
  -1.4230000e-02
  -3.5810000e-02
  -1.8730000e-02
   7.6630000e-02
   2.2430000e-02
  -4.9220000e-02
   4.7380000e-02
  -5.8000000e-04
  -2.8820000e-02
  -2.0180000e-02
  -4.8750000e-02
  -3.3830000e-02
   1.4310000e-02
   7.8100000e-03
  -5.1490000e-02
   6.3280000e-02
   7.7400000e-02
  -3.0300000e-02
  -4.3270000e-02
   3.3670000e-02
   4.7820000e-02
  -2.5060000e-02
  -5.0000000e-05
   5.8590000e-02
  -5.7190000e-02
   6.5860000e-02
  -9.7690000e-02
   3.6660000e-02
  -2.0590000e-02
  -4.4800000e-02
  -4.0110000e-02
  -2.4130000e-02
   5.3820000e-02
  -4.4100000e-03
   4.9900000e-02
  -1.7850000e-02
   2.2620000e-02
  -6.7400000e-03
   6.8000000e-03
   4.1840000e-02
  -5.7330000e-02
   1.3630000e-02
   4.3590000e-02
  -6.5830000e-02
  -3.0020000e-02
  -2.4620000e-02
   5.4320000e-02
   2.6900000e-02
  -6.3390000e-02
  -4.7000000e-04
   1.6500000e-03
  -1.7630000e-02
   3.2270000e-02
   3.0960000e-02
  -7.7620000e-02
   2.2800000e-03
  -1.7270000e-02
   1.0100000e-03
   2.6300000e-03
  -3.5120000e-02
   2.6600000e-02
   6.4600000e-02
  -3.9780000e-02
   6.8130000e-02
   2.9390000e-02
  -3.5810000e-02
   3.9320000e-02
  -1.5710000e-02
   1.6730000e-02
   4.3840000e-02
  -3.9350000e-02
  -5.8460000e-02
   2.9970000e-02
  -8.0000000e-04
  -4.7350000e-02
   4.7210000e-02
   1.7520000e-02
  -4.6470000e-02
  -3.1040000e-02
  -5.2420000e-02
  -1.4420000e-02
   2.4050000e-02
  -3.3500000e-02
   4.1920000e-02
  -2.2460000e-02
  -5.2600000e-03
  -9.6000000e-04
  -4.8800000e-03
   7.2900000e-02
  -5.0590000e-02
   3.8400000e-03
   6.1880000e-02
  -6.6710000e-02
  -5.3660000e-02
   4.9300000e-02
   2.1250000e-02
   2.8930000e-02
  -1.9770000e-02
  -3.8250000e-02
   4.4970000e-02
  -2.4810000e-02
   4.9380000e-02
  -7.9000000e-03
  -2.3250000e-02
   8.4060000e-02
  -8.1130000e-02
   4.1920000e-02
   1.1800000e-03
   3.1500000e-03
  -4.5490000e-02
  -7.3340000e-02
   9.2430000e-02
  -5.4860000e-02
  -1.0394000e-01
  -5.7630000e-02
   7.4250000e-02
   2.5330000e-02
  -4.3570000e-02
   1.4090000e-02
  -6.4400000e-03
   6.5300000e-03
   5.3850000e-02
  -1.7770000e-02
  -2.2210000e-02
   4.6450000e-02
   2.1990000e-02
  -8.0600000e-03
  -3.4740000e-02
   7.4410000e-02
  -3.6500000e-03
  -3.6050000e-02
   5.1030000e-02
   7.1040000e-02
  -1.7160000e-02
  -5.4150000e-02
  -2.4810000e-02
   1.1505000e-01
   3.9540000e-02
  -1.6325000e-01
   9.4260000e-02
   8.6830000e-02
  -1.1222000e-01
  -1.4414000e-01
   1.9580000e-02
   4.0660000e-02
  -7.0600000e-02
  -8.3270000e-02
   4.3810000e-02
   1.4530000e-02
  -5.5300000e-02
  -1.8340000e-02
   4.3980000e-02
   1.1521000e-01
  -6.4100000e-02
  -1.1447000e-01
   8.8090000e-02
   1.0079000e-01
  -6.7480000e-02
  -6.5310000e-02
   4.9850000e-02
   1.7024000e-01
  -1.7868000e-01
  -4.5600000e-02
   6.8980000e-02
  -1.4530000e-02
  -4.0000000e-02
  -1.1760000e-02
   5.0010000e-02
  -4.7200000e-03
  -8.0300000e-03
   4.5620000e-02
   1.0655000e-01
  -6.5940000e-02
  -3.0200000e-03
  -2.0540000e-02
  -3.2660000e-02
  -1.8810000e-02
  -5.5660000e-02
   6.8270000e-02
   5.7300000e-03
  -2.2400000e-02
  -1.5130000e-02
  -8.0280000e-02
   1.0723000e-01
  -2.8900000e-02
  -4.1100000e-02
   5.6890000e-02
   3.8660000e-02
   4.7600000e-02
   2.2570000e-02
  -1.1000000e-04
   5.4510000e-02
  -7.6110000e-02
   3.5070000e-02
  -1.4530000e-02
  -1.4670000e-02
  -4.7760000e-02
  -5.1980000e-02
   4.0900000e-03
  -6.9260000e-02
   5.1980000e-02
  -1.7300000e-03
   2.3550000e-02
  -2.1300000e-02
  -3.1480000e-02
   5.2670000e-02
   2.2370000e-02
  -1.2230000e-02
  -3.3340000e-02
   3.9730000e-02
  -8.3900000e-03
  -4.6120000e-02
   9.6500000e-03
   2.7750000e-02
  -5.7820000e-02
  -2.2260000e-02
   3.2740000e-02
  -2.8840000e-02
   6.7640000e-02
  -6.0650000e-02
  -1.4450000e-02
   6.6850000e-02
   3.5600000e-03
  -6.8760000e-02
  -1.8510000e-02
   9.1300000e-02
  -1.3790000e-02
  -2.4130000e-02
  -3.8550000e-02
   1.6310000e-02
  -5.3110000e-02
   1.6010000e-02
  -1.8950000e-02
   8.6260000e-02
   9.2400000e-03
  -3.4550000e-02
  -1.8860000e-02
  -2.1960000e-02
  -8.2300000e-03
   4.4550000e-02
  -2.2150000e-02
   3.1420000e-02
  -1.3960000e-02
  -4.1100000e-02
   7.7130000e-02
  -4.2090000e-02
   3.5600000e-03
   4.1430000e-02
   1.1820000e-02
  -9.4570000e-02
   2.5830000e-02
   1.8890000e-02
  -5.6120000e-02
   3.1340000e-02
  -8.1460000e-02
   1.5410000e-02
   7.0700000e-03
   3.2600000e-03
   6.8000000e-03
  -9.2400000e-03
   5.5520000e-02
   4.5980000e-02
   2.7830000e-02
  -1.6700000e-02
   1.1950000e-02
  -3.8880000e-02
   2.5550000e-02
  -1.5030000e-02
  -6.2020000e-02
  -8.5800000e-03
  -1.0100000e-03
  -2.9970000e-02
  -1.5617000e-01
   6.1940000e-02
   1.0751000e-01
  -7.3400000e-02
  -1.3080000e-02
   6.3470000e-02
   9.3580000e-02
  -5.6480000e-02
   1.5790000e-02
   9.6240000e-02
  -9.7310000e-02
   7.8200000e-02
   6.0000000e-04
  -1.1902000e-01
  -1.6590000e-02
  -1.2100000e-03
   1.2970000e-02
  -3.6380000e-02
   6.1700000e-03
   6.9100000e-03
  -6.8790000e-02
   9.2400000e-03
   5.5360000e-02
  -4.9930000e-02
   4.5430000e-02
  -1.0450000e-02
   2.8930000e-02
   5.5630000e-02
  -1.7900000e-02
   8.3600000e-03
  -1.0243000e-01
   2.4590000e-02
   6.3770000e-02
  -6.2240000e-02
  -2.1690000e-02
  -6.0900000e-03
   2.7750000e-02
  -5.0970000e-02
  -6.3990000e-02
   6.6650000e-02
   2.3580000e-02
   2.1250000e-02
   1.4200000e-02
  -3.9810000e-02
   9.5360000e-02
  -1.6340000e-02
   2.9310000e-02
  -3.9500000e-03
  -5.1500000e-03
  -2.9340000e-02
   7.6360000e-02
  -4.9790000e-02
  -8.0600000e-03
   2.7700000e-03
  -3.7780000e-02
  -3.9500000e-03
  -4.5870000e-02
   4.3210000e-02
  -3.3200000e-03
  -8.3320000e-02
  -3.8850000e-02
  -1.4500000e-02
   5.1680000e-02
  -2.2000000e-04
  -5.8240000e-02
   1.6920000e-02
   6.4980000e-02
  -4.9000000e-02
  -1.8400000e-03
   3.6960000e-02
   7.7240000e-02
  -7.6410000e-02
  -7.0570000e-02
   1.1494000e-01
   1.9300000e-02
  -5.7990000e-02
  -1.5850000e-02
   2.6730000e-02
   7.2690000e-02
  -9.4590000e-02
   1.0690000e-02
   2.9610000e-02
  -5.1710000e-02
   6.7720000e-02
  -1.0633000e-01
   3.3940000e-02
   7.4600000e-03
   1.8900000e-03
   6.3100000e-03
  -2.7860000e-02
   1.9190000e-02
   5.1570000e-02
  -9.4300000e-03
  -2.2320000e-02
   4.9190000e-02
  -4.8670000e-02
  -6.3230000e-02
  -9.8400000e-03
  -2.8160000e-02
  -2.4320000e-02
  -4.0300000e-03
  -1.6830000e-02
  -7.3800000e-03
   2.5580000e-02
   2.0020000e-02
   2.8600000e-02
  -2.3720000e-02
  -6.6400000e-03
   1.2091000e-01
  -4.5320000e-02
  -2.2200000e-03
   8.4450000e-02
  -3.5230000e-02
  -2.6870000e-02
  -2.7580000e-02
   2.9780000e-02
   1.1050000e-02
  -5.8540000e-02
  -4.5320000e-02
  -5.1930000e-02
   3.3560000e-02
   6.4400000e-03
  -5.4000000e-03
   4.9540000e-02
  -1.9000000e-02
   1.7600000e-02
  -5.8700000e-03
   3.6690000e-02
   7.9730000e-02
  -9.3610000e-02
  -6.2950000e-02
   2.5960000e-02
   1.3430000e-02
  -6.4540000e-02
  -5.1300000e-03
  -3.0630000e-02
   2.7690000e-02
  -5.9630000e-02
   4.4610000e-02
   1.7300000e-02
  -5.2560000e-02
   7.3540000e-02
   1.6500000e-03
   5.5550000e-02
  -1.4260000e-02
  -5.6810000e-02
   9.7360000e-02
   2.8100000e-02
  -9.2180000e-02
  -5.2860000e-02
   9.7720000e-02
   3.4350000e-02
  -1.0452000e-01
  -2.9560000e-02
   1.0219000e-01
  -3.5310000e-02
  -1.4866000e-01
   4.6580000e-02
   1.9410000e-02
  -3.3810000e-02
   9.3000000e-04
  -3.7780000e-02
   9.1080000e-02
   2.8760000e-02
  -1.1020000e-02
  -1.5460000e-02
   7.3430000e-02
  -1.2370000e-02
  -4.6390000e-02
  -4.4090000e-02
   6.4200000e-03
   2.9450000e-02
  -4.4420000e-02
   2.5220000e-02
   3.5200000e-02
   5.8700000e-03
  -3.7000000e-03
   8.8800000e-03
   2.4730000e-02
  -4.4010000e-02
  -2.0040000e-02
  -5.5000000e-04
   9.1000000e-03
  -1.2090000e-02
  -7.5240000e-02
  -2.1630000e-02
  -9.3990000e-02
   6.0100000e-02
   2.7560000e-02
  -4.0770000e-02
   3.6630000e-02
  -6.3100000e-03
   4.2850000e-02
   2.7450000e-02
   5.0010000e-02
   5.4000000e-03
   9.5400000e-03
   4.3180000e-02
  -6.9090000e-02
  -1.3600000e-02
   1.4040000e-02
   1.7600000e-02
   2.3500000e-02
  -5.3000000e-02
  -1.7000000e-03
   3.6360000e-02
  -4.8450000e-02
   4.3510000e-02
   4.7460000e-02
  -7.7100000e-02
   1.7520000e-02
  -7.0500000e-03
   3.4140000e-02
   5.7220000e-02
  -7.8960000e-02
  -7.8400000e-03
  -2.3440000e-02
   1.6530000e-02
  -9.6200000e-03
  -5.3470000e-02
  -4.1100000e-03
  -6.6900000e-02
  -2.0290000e-02
   8.2000000e-03
   2.3580000e-02
   5.6100000e-02
  -7.2080000e-02
   5.7880000e-02
   8.2830000e-02
   3.1640000e-02
   1.1600000e-02
   1.8860000e-02
   2.2240000e-02
   3.5670000e-02
  -9.2780000e-02
   4.7930000e-02
   7.8330000e-02
  -1.3473000e-01
  -6.2490000e-02
   5.2590000e-02
  -6.0650000e-02
  -7.1150000e-02
  -4.0850000e-02
   3.5970000e-02
   4.3900000e-02
  -5.9470000e-02
  -3.1670000e-02
   6.2100000e-02
   4.1020000e-02
  -2.6600000e-02
   6.1910000e-02
   8.1700000e-03
   3.8930000e-02
  -6.0320000e-02
  -8.5000000e-03
   7.6470000e-02
   4.8500000e-03
  -2.0070000e-02
   1.2780000e-02
   6.2500000e-03
   1.5440000e-02
  -5.5630000e-02
   2.1300000e-02
  -1.1790000e-02
   7.4520000e-02
  -2.6620000e-02
  -5.7800000e-02
   4.0140000e-02
  -8.2000000e-03
  -7.8910000e-02
   9.3000000e-04
   3.6820000e-02
   8.0300000e-03
   7.7000000e-04
  -1.4640000e-02
   1.2176000e-01
   1.3540000e-02
  -4.8280000e-02
  -3.2300000e-02
   4.0440000e-02
  -6.2510000e-02
   2.1820000e-02
  -6.0600000e-03
  -6.1060000e-02
  -9.4900000e-03
  -4.7160000e-02
   4.1290000e-02
   1.8320000e-02
  -1.6200000e-02
  -3.8660000e-02
   1.6780000e-02
   3.0630000e-02
   2.5000000e-04
   1.9200000e-03
  -2.6430000e-02
   2.1470000e-02
   2.7800000e-02
   3.0980000e-02
   2.0890000e-02
  -4.9430000e-02
   7.5890000e-02
  -1.2370000e-02
  -7.6200000e-03
   4.5980000e-02
  -4.0910000e-02
   1.3020000e-02
  -4.9110000e-02
   2.4730000e-02
   3.2400000e-03
  -6.1220000e-02
   3.3700000e-02
  -6.8570000e-02
   4.1890000e-02
  -2.7990000e-02
   9.3200000e-03
   8.4720000e-02
   1.7270000e-02
  -6.9370000e-02
  -3.6550000e-02
   1.1472000e-01
   4.5320000e-02
  -1.1425000e-01
  -5.4620000e-02
   1.3870000e-02
   6.6710000e-02
  -1.4992000e-01
  -1.4340000e-02
   9.4650000e-02
  -1.9270000e-02
  -3.1530000e-02
  -1.8970000e-02
   8.6830000e-02
  -2.6130000e-02
  -4.2580000e-02
   3.7540000e-02
   1.9770000e-02
   5.0500000e-02
   4.9410000e-02
  -5.2750000e-02
  -1.2300000e-03
   3.7890000e-02
   3.6140000e-02
  -7.6550000e-02
   5.2400000e-02
   1.5820000e-02
  -5.5060000e-02
   1.5410000e-02
   1.4530000e-02
   6.7830000e-02
  -2.8020000e-02
  -4.4830000e-02
   5.1960000e-02
  -2.1080000e-02
   5.1000000e-03
  -1.3330000e-02
  -1.5030000e-02
  -1.0720000e-02
  -3.5310000e-02
  -4.2060000e-02
   5.4620000e-02
   5.0970000e-02
  -4.7930000e-02
   5.0400000e-03
  -1.8290000e-02
   1.4172000e-01
   8.0000000e-04
  -1.1551000e-01
   3.9650000e-02
   4.4310000e-02
   2.7860000e-02
  -1.1631000e-01
  -2.1630000e-02
   3.7040000e-02
  -2.7400000e-03
  -3.4000000e-02
  -5.6970000e-02
   1.0635000e-01
  -2.8730000e-02
  -3.7750000e-02
   5.4400000e-02
   8.0500000e-02
  -1.0530000e-02
  -8.7710000e-02
   4.3380000e-02
   6.3000000e-04
   1.5740000e-02
   5.0400000e-03
  -5.1000000e-03
   4.3950000e-02
   3.1750000e-02
  -6.1060000e-02
  -3.8900000e-03
   5.6200000e-03
  -4.5510000e-02
  -5.2400000e-02
  -6.3720000e-02
   1.3375000e-01
   5.9030000e-02
  -1.3440000e-01
   4.1150000e-02
   6.1390000e-02
  -5.9090000e-02
   4.6720000e-02
   8.7200000e-03
  -1.9030000e-02
  -5.8950000e-02
  -1.4633000e-01
   1.0671000e-01
  -7.4390000e-02
   2.8800000e-03
   3.0160000e-02
   5.2600000e-03
   6.3090000e-02
   2.6810000e-02
   8.0000000e-04
   2.0300000e-03
  -7.4600000e-03
   9.3330000e-02
  -7.7600000e-03
  -7.2880000e-02
   1.1461000e-01
   5.3200000e-03
  -4.8860000e-02
   9.3000000e-04
   3.3700000e-02
   6.9940000e-02
  -1.2464000e-01
  -4.2500000e-03
   3.3500000e-02
   5.7220000e-02
  -5.4510000e-02
  -8.2230000e-02
   3.1940000e-02
   7.4580000e-02
  -1.2993000e-01
  -5.5690000e-02
   9.0800000e-03
   1.8010000e-02
  -4.1460000e-02
  -7.6170000e-02
  -4.3000000e-03
   7.7150000e-02
  -2.9640000e-02
  -3.1940000e-02
   4.1890000e-02
   1.8370000e-02
  -1.1380000e-02
   2.8710000e-02
   4.4140000e-02
   1.1730000e-02
   3.9650000e-02
  -1.4280000e-02
   1.4860000e-02
   7.5560000e-02
   3.1500000e-03
   2.1930000e-02
   9.2700000e-02
  -7.0030000e-02
   1.6810000e-02
  -1.5270000e-02
  -5.1550000e-02
  -3.6360000e-02
  -3.7860000e-02
   3.0240000e-02
   7.9200000e-03
  -3.7430000e-02
  -4.3020000e-02
  -2.7310000e-02
   6.7370000e-02
  -5.0670000e-02
   5.8100000e-03
   1.9740000e-02
  -2.2590000e-02
  -2.9150000e-02
  -5.2640000e-02
  -4.1400000e-03
  -4.7380000e-02
  -6.1100000e-03
   4.0900000e-03
  -4.9630000e-02
   1.0158000e-01
  -6.5300000e-03
   3.2980000e-02
   5.9880000e-02
   4.0850000e-02
   7.9620000e-02
  -5.7520000e-02
   2.2700000e-02
   7.4820000e-02
  -4.9000000e-04
  -1.9080000e-02
   2.9340000e-02
  -6.2430000e-02
   3.2820000e-02
  -5.7140000e-02
   6.6430000e-02
  -8.0750000e-02
  -5.2120000e-02
  -2.5940000e-02
   6.2200000e-03
  -2.4130000e-02
  -2.5640000e-02
   3.0740000e-02
  -1.9930000e-02
   2.7500000e-02
  -6.2290000e-02
   8.7700000e-03
   2.9010000e-02
  -2.2570000e-02
   5.0920000e-02
   1.1156000e-01
   9.6800000e-03
  -2.5500000e-02
  -2.0780000e-02
   3.8410000e-02
   3.3070000e-02
  -2.2040000e-02
  -7.6440000e-02
   3.3590000e-02
   1.1675000e-01
  -1.0035000e-01
   2.9940000e-02
   6.9180000e-02
  -6.3200000e-02
  -5.7990000e-02
  -1.3130000e-02
   4.9490000e-02
  -7.2190000e-02
   3.8500000e-02
  -9.1600000e-03
  -4.9850000e-02
   2.1610000e-02
   2.2920000e-02
  -1.8640000e-02
   4.0300000e-03
  -3.9480000e-02
  -2.6490000e-02
   1.9550000e-02
  -8.6400000e-03
  -3.8520000e-02
   2.9470000e-02
  -2.5960000e-02
  -2.4400000e-02
   5.4000000e-03
   6.9100000e-03
   3.5100000e-02
  -3.3450000e-02
   1.6200000e-03
   6.0020000e-02
  -2.1630000e-02
   5.2400000e-03
   2.5960000e-02
   3.4080000e-02
   4.4830000e-02
   3.1120000e-02
  -9.7100000e-03
  -7.9800000e-03
   1.7990000e-02
  -1.1540000e-02
  -2.0430000e-02
  -7.7000000e-04
  -7.9000000e-03
   3.7450000e-02
   1.0390000e-02
   1.9200000e-03
  -3.9370000e-02
  -3.3500000e-02
  -2.8430000e-02
  -5.9720000e-02
  -3.3120000e-02
   2.4400000e-03
  -3.4300000e-02
  -4.3810000e-02
  -4.4690000e-02
   1.1628000e-01
  -1.3050000e-02
  -2.2920000e-02
   1.2648000e-01
   7.3200000e-03
  -2.2840000e-02
   1.0400000e-03
   4.0000000e-03
   1.2363000e-01
  -2.8710000e-02
  -9.2400000e-02
   6.3940000e-02
   2.9170000e-02
  -1.3630000e-02
  -1.3800000e-01
   6.6600000e-03
   1.2060000e-02
   7.0700000e-03
   2.7170000e-02
   6.9600000e-03
  -1.9850000e-02
   1.9490000e-02
  -1.8260000e-02
   5.1550000e-02
   1.7900000e-02
  -5.0420000e-02
  -7.1640000e-02
  -5.4560000e-02
   3.3400000e-02
   3.5620000e-02
  -2.7990000e-02
   7.8100000e-03
   2.1360000e-02
   2.0210000e-02
  -9.2510000e-02
   2.2100000e-02
   7.8660000e-02
  -1.6530000e-02
   6.5970000e-02
  -1.1630000e-02
   9.4590000e-02
  -4.9820000e-02
  -1.1436000e-01
   1.2333000e-01
   6.3940000e-02
  -1.1121000e-01
  -1.3080000e-02
   9.0970000e-02
  -2.6540000e-02
  -1.4194000e-01
  -1.5600000e-02
   6.1280000e-02
  -6.0590000e-02
  -1.0560000e-02
  -1.5330000e-02
   4.5900000e-02
   5.1050000e-02
  -7.8700000e-03
  -5.2640000e-02
   6.6350000e-02
   5.2860000e-02
  -3.5670000e-02
   2.0870000e-02
   3.8600000e-02
   1.1380000e-02
   1.2390000e-02
   2.2730000e-02
  -2.7010000e-02
  -5.8370000e-02
  -5.2890000e-02
   7.8640000e-02
   1.4590000e-02
  -6.8220000e-02
  -5.5000000e-04
   5.8540000e-02
   9.9800000e-03
  -2.3940000e-02
  -3.9480000e-02
   2.5310000e-02
  -2.1820000e-02
  -9.2900000e-03
  -2.3420000e-02
   1.3740000e-02
   5.6800000e-03
   1.0140000e-02
   6.8000000e-03
  -2.3550000e-02
   5.3490000e-02
  -5.4750000e-02
  -3.9320000e-02
   3.6700000e-03
   9.9770000e-02
  -4.8530000e-02
  -4.3320000e-02
   6.7780000e-02
   1.3050000e-02
   8.6100000e-03
   1.3350000e-02
  -5.3250000e-02
   5.2310000e-02
   5.7900000e-03
  -8.5490000e-02
   7.4930000e-02
   4.3950000e-02
  -1.0115000e-01
   1.1820000e-02
   9.2180000e-02
   5.4800000e-03
  -3.8700000e-03
  -9.4700000e-02
   4.2060000e-02
  -4.5900000e-02
   1.6860000e-02
  -8.2940000e-02
  -1.6670000e-02
   9.8240000e-02
  -1.2648000e-01
  -1.2260000e-02
   3.6800000e-02
  -2.1850000e-02
   1.8780000e-02
  -7.1750000e-02
   1.1203000e-01
   2.2620000e-02
  -6.9560000e-02
   9.0230000e-02
   3.6900000e-02
   3.7370000e-02
  -5.9580000e-02
   1.7880000e-02
   6.3450000e-02
  -9.1960000e-02
  -1.6260000e-02
  -1.8920000e-02
   2.1690000e-02
  -2.2620000e-02
  -8.8090000e-02
   9.0700000e-02
   4.2580000e-02
  -1.0707000e-01
  -2.4620000e-02
   8.1430000e-02
   1.0718000e-01
  -1.0093000e-01
   1.4500000e-02
  -4.6900000e-03
  -3.2550000e-02
  -3.4270000e-02
  -1.2176000e-01
   1.0592000e-01
  -9.4300000e-03
  -5.9360000e-02
   3.3260000e-02
   1.0500000e-02
   7.8000000e-02
  -2.7530000e-02
   1.2200000e-02
   8.9900000e-02
  -1.3139000e-01
   1.9630000e-02
   1.1979000e-01
  -6.0590000e-02
  -2.8210000e-02
   3.1670000e-02
   4.9520000e-02
  -7.3730000e-02
  -6.6790000e-02
   9.1960000e-02
  -1.2300000e-03
  -6.7910000e-02
  -3.4990000e-02
   2.9750000e-02
   1.1980000e-02
  -6.2900000e-02
   2.9060000e-02
  -7.0550000e-02
   5.5060000e-02
   3.1370000e-02
  -3.1970000e-02
   7.7570000e-02
  -1.0915000e-01
   9.1820000e-02
   6.3580000e-02
  -7.1590000e-02
   7.2990000e-02
  -5.2400000e-02
   3.3940000e-02
   3.9840000e-02
  -8.3680000e-02
   1.7500000e-03
   3.2960000e-02
  -4.1430000e-02
   4.1370000e-02
  -5.4180000e-02
   4.2500000e-03
  -1.5460000e-02
  -3.0900000e-02
  -1.0170000e-02
   2.3830000e-02
  -2.8510000e-02
   1.9910000e-02
   3.8220000e-02
  -1.1500000e-03
  -1.3520000e-02
  -2.6730000e-02
   4.7320000e-02
  -2.8380000e-02
   6.6380000e-02
   7.7980000e-02
  -2.7580000e-02
  -3.8190000e-02
   2.5000000e-03
   8.8450000e-02
  -2.0650000e-02
  -3.8360000e-02
   2.3850000e-02
  -6.8300000e-03
  -7.7020000e-02
  -3.1370000e-02
   9.9170000e-02
  -7.0250000e-02
  -6.4320000e-02
   5.6510000e-02
   2.7690000e-02
  -2.8980000e-02
   1.0040000e-02
   2.1990000e-02
  -4.5460000e-02
  -2.3000000e-03
  -1.5380000e-02
  -4.1370000e-02
   5.5140000e-02
   7.3500000e-03
   5.0230000e-02
  -2.5090000e-02
  -4.6890000e-02
   1.2100000e-03
   1.8180000e-02
   9.6800000e-03
  -2.8020000e-02
  -1.4970000e-02
  -2.3250000e-02
   2.9560000e-02
   1.9550000e-02
   7.6110000e-02
   8.5300000e-03
  -2.0000000e-03
  -3.6630000e-02
   7.3500000e-03
   2.1880000e-02
   8.7960000e-02
  -4.5500000e-03
  -4.5400000e-02
   1.0040000e-02
   3.6410000e-02
  -9.7640000e-02
  -5.2180000e-02
   4.9130000e-02
  -4.5840000e-02
  -1.4500000e-02
   3.9200000e-03
  -4.9410000e-02
   8.3410000e-02
   1.8180000e-02
  -2.0450000e-02
  -7.9500000e-03
  -2.1500000e-02
  -5.6200000e-03
  -1.6180000e-02
   2.4870000e-02
  -2.1410000e-02
  -1.1630000e-02
   2.7390000e-02
  -1.0830000e-02
   2.4650000e-02
  -4.3650000e-02
  -2.5500000e-02
  -2.8980000e-02
  -6.6870000e-02
  -6.5310000e-02
   3.0460000e-02
   3.8400000e-03
  -6.3360000e-02
   8.4720000e-02
   4.8480000e-02
   1.0310000e-02
   6.1100000e-03
   4.9380000e-02
   1.2322000e-01
  -2.6840000e-02
   2.9640000e-02
  -2.7450000e-02
   6.3450000e-02
   9.8200000e-03
  -9.9800000e-02
   5.1220000e-02
   7.5400000e-03
  -4.4830000e-02
  -2.1100000e-03
  -5.3550000e-02
   5.8730000e-02
  -4.3160000e-02
  -2.3520000e-02
   1.5030000e-02
  -4.5350000e-02
  -9.5770000e-02
  -8.5050000e-02
   9.4260000e-02
   1.8180000e-02
   3.0350000e-02
  -1.1889000e-01
   5.1240000e-02
   3.4250000e-02
  -2.3360000e-02
  -1.8600000e-03
  -5.8000000e-04
   6.6080000e-02
  -8.2500000e-03
   5.5660000e-02
   1.3930000e-02
   6.6300000e-02
  -2.2130000e-02
   2.6180000e-02
   4.8610000e-02
  -5.7220000e-02
  -2.3440000e-02
  -6.2730000e-02
   5.4480000e-02
  -2.4400000e-03
   1.3870000e-02
  -8.2580000e-02
  -6.2130000e-02
   1.7841000e-01
  -7.3370000e-02
  -2.2400000e-02
   8.3790000e-02
  -4.0830000e-02
  -2.7560000e-02
  -3.8410000e-02
   3.6440000e-02
  -9.1600000e-03
  -6.1940000e-02
   1.0610000e-02
   2.5470000e-02
   3.3200000e-03
   1.4450000e-02
  -3.7600000e-03
   6.2600000e-02
  -8.2640000e-02
   4.3050000e-02
  -3.5890000e-02
  -1.4180000e-02
   3.4050000e-02
  -2.8000000e-03
   1.1240000e-02
  -4.4970000e-02
   3.2020000e-02
   4.9540000e-02
  -6.1830000e-02
  -1.1790000e-02
  -1.7960000e-02
   3.0050000e-02
   9.5700000e-03
  -3.2240000e-02
   3.6550000e-02
   5.1240000e-02
   3.4250000e-02
  -6.3860000e-02
  -9.6200000e-03
  -1.0140000e-02
   1.6670000e-02
   2.9100000e-03
  -1.7140000e-02
   1.6400000e-02
  -3.3970000e-02
  -5.3080000e-02
   4.7320000e-02
   1.7220000e-02
  -1.5550000e-02
  -4.9900000e-03
  -3.8910000e-02
   3.3700000e-03
   1.5160000e-02
   3.5150000e-02
  -4.9190000e-02
   7.5590000e-02
  -8.6610000e-02
   3.6820000e-02
  -3.8520000e-02
   2.6570000e-02
   3.3610000e-02
  -4.7900000e-02
   8.7740000e-02
   6.8300000e-03
   4.8060000e-02
  -5.0970000e-02
  -2.2670000e-02
   2.0540000e-02
   1.1240000e-02
  -2.7770000e-02
  -6.6540000e-02
   4.7600000e-02
  -1.9800000e-02
  -7.5590000e-02
   9.0370000e-02
   6.8660000e-02
  -5.4480000e-02
  -8.4780000e-02
   1.8900000e-03
   5.9740000e-02
  -4.5130000e-02
  -3.9800000e-03
   6.8500000e-03
   3.7810000e-02
  -7.0250000e-02
  -2.2180000e-02
   7.4690000e-02
   3.3370000e-02
  -5.7300000e-02
  -8.5800000e-03
   5.3900000e-02
  -3.5640000e-02
   7.1800000e-03
  -1.4810000e-02
   1.9380000e-02
   1.6480000e-02
   5.3330000e-02
  -1.2260000e-02
   5.3250000e-02
  -1.1820000e-02
  -2.6380000e-02
   5.7720000e-02
  -4.5430000e-02
  -5.9420000e-02
  -2.1100000e-03
  -8.9710000e-02
   2.5880000e-02
   1.4090000e-02
  -5.4800000e-03
  -9.3000000e-02
   5.3250000e-02
   1.0279000e-01
  -2.0191000e-01
  -1.0640000e-02
   1.6881000e-01
   3.5480000e-02
  -1.5694000e-01
   6.5010000e-02
   8.5930000e-02
   1.1680000e-02
  -4.9870000e-02
  -2.1140000e-02
   1.1464000e-01
  -7.8360000e-02
  -1.2845000e-01
  -1.4070000e-02
   5.3410000e-02
   1.1540000e-02
   2.4700000e-03
  -7.9900000e-02
   1.1041000e-01
  -7.9430000e-02
   4.3270000e-02
   1.2467000e-01
  -5.1820000e-02
   1.2300000e-03
   4.0300000e-03
   3.9650000e-02
  -5.4530000e-02
  -7.8470000e-02
   7.1150000e-02
   3.7600000e-03
  -6.0900000e-03
  -4.6340000e-02
  -3.7370000e-02
   6.0680000e-02
  -3.4770000e-02
  -4.9850000e-02
   3.4710000e-02
   3.0650000e-02
   2.8980000e-02
  -8.1100000e-02
  -2.9200000e-02
   6.8240000e-02
   5.3190000e-02
  -8.1160000e-02
  -2.9500000e-02
   1.6920000e-02
   2.2150000e-02
  -1.5980000e-02
  -3.0540000e-02
   7.0300000e-02
   3.7800000e-03
  -5.8590000e-02
  -4.0770000e-02
   7.5370000e-02
   7.1150000e-02
   7.0440000e-02
  -6.5200000e-02
  -4.0190000e-02
   2.4980000e-02
  -4.4800000e-02
   1.8670000e-02
   2.7720000e-02
  -3.6000000e-02
  -6.4400000e-03
  -9.6800000e-03
  -1.5900000e-02
  -6.4410000e-02
   7.1120000e-02
   6.0210000e-02
  -1.0424000e-01
   1.6890000e-02
  -7.0500000e-03
  -1.9800000e-02
  -7.9540000e-02
  -7.0700000e-03
   1.0243000e-01
  -2.0070000e-02
  -2.6490000e-02
   3.6330000e-02
  -4.2800000e-03
   3.2380000e-02
  -3.5400000e-02
   3.9760000e-02
   6.0050000e-02
  -8.7900000e-02
   6.5500000e-03
   9.2400000e-03
   3.4900000e-02
   8.1700000e-03
  -3.1060000e-02
   3.4080000e-02
  -1.4167000e-01
   1.4420000e-02
   2.6020000e-02
  -3.4520000e-02
  -1.9930000e-02
  -4.4660000e-02
   9.8240000e-02
   2.8790000e-02
  -2.0450000e-02
   5.0480000e-02
   1.0090000e-02
   7.5700000e-03
  -7.2250000e-02
  -2.7880000e-02
   1.1488000e-01
  -3.4850000e-02
  -2.4400000e-02
   7.6470000e-02
  -2.2780000e-02
   5.0610000e-02
  -3.1810000e-02
   6.4080000e-02
  -8.2500000e-03
  -6.6490000e-02
   4.2640000e-02
  -5.6800000e-03
  -6.6300000e-02
  -9.7390000e-02
   1.0700000e-03
   1.0315000e-01
  -6.8800000e-03
  -5.6840000e-02
   5.7000000e-03
  -1.8120000e-02
   6.3300000e-03
  -4.2660000e-02
  -3.6110000e-02
   1.5845000e-01
  -6.1550000e-02
  -7.3120000e-02
   2.3330000e-02
  -5.8320000e-02
  -1.9520000e-02
   2.4070000e-02
  -5.1030000e-02
  -4.6200000e-02
   1.0430000e-01
  -1.9060000e-02
  -5.8210000e-02
   5.4180000e-02
   7.3180000e-02
  -9.3500000e-03
  -3.2820000e-02
   7.2220000e-02
   7.2050000e-02
  -4.6720000e-02
  -3.2900000e-03
  -3.4790000e-02
  -3.6770000e-02
   1.2830000e-02
  -7.2850000e-02
   3.8850000e-02
   2.5500000e-02
  -7.7460000e-02
  -5.0500000e-02
   6.5170000e-02
   7.4330000e-02
  -5.4530000e-02
  -8.7000000e-02
   8.4040000e-02
   3.1340000e-02
  -2.1740000e-02
   0.0000000e+00
   1.0400000e-03
  -1.4310000e-02
  -2.6870000e-02
  -1.0170000e-02
   6.9310000e-02
   3.5890000e-02
  -7.4330000e-02
  -6.1060000e-02
   5.5440000e-02
   5.6670000e-02
  -1.2686000e-01
  -5.3030000e-02
   4.0550000e-02
  -8.6400000e-03
   2.9690000e-02
   2.5440000e-02
  -1.7580000e-02
   1.9200000e-03
   2.2890000e-02
   5.8900000e-03
   1.3870000e-02
   3.6330000e-02
  -2.8430000e-02
  -5.5060000e-02
   1.3790000e-02
  -3.7750000e-02
   3.4500000e-03
  -3.0200000e-03
  -1.0150000e-01
   1.7330000e-02
   7.8940000e-02
   6.9000000e-04
  -1.1500000e-03
   1.6200000e-02
   4.5570000e-02
   4.0060000e-02
  -4.8800000e-02
   2.8540000e-02
   1.5270000e-02
  -3.4140000e-02
   5.4800000e-03
  -5.5660000e-02
   3.2660000e-02
  -1.8100000e-02
  -9.2120000e-02
   6.9970000e-02
  -6.5280000e-02
   8.7200000e-03
   6.0430000e-02
  -5.1880000e-02
   1.1902000e-01
  -7.9700000e-02
  -3.8700000e-03
   5.7250000e-02
  -6.9400000e-03
   7.6410000e-02
  -3.6880000e-02
  -2.1720000e-02
  -1.8260000e-02
  -9.7220000e-02
   8.0360000e-02
  -7.7480000e-02
   2.3600000e-03
  -9.2700000e-03
  -3.2980000e-02
   4.6990000e-02
  -5.0230000e-02
   2.4050000e-02
   2.0000000e-03
  -3.4140000e-02
  -2.8950000e-02
   3.9760000e-02
  -3.4740000e-02
  -2.2130000e-02
   1.1540000e-01
  -3.7320000e-02
  -1.9740000e-02
   1.1900000e-02
  -1.2420000e-02
   1.6890000e-01
  -7.0680000e-02
  -6.5690000e-02
   5.8980000e-02
   7.7300000e-03
  -6.0620000e-02
   5.0810000e-02
  -5.0640000e-02
   2.1100000e-03
   1.7300000e-03
  -4.6560000e-02
   6.9000000e-04
   2.7660000e-02
  -4.1100000e-02
  -1.2830000e-02
   9.6290000e-02
  -3.7560000e-02
  -3.9700000e-02
   6.4100000e-02
  -6.5000000e-03
  -9.8920000e-02
   4.4660000e-02
   1.9580000e-02
  -3.7180000e-02
  -3.5700000e-02
   3.8190000e-02
   4.0170000e-02
  -6.7720000e-02
  -3.0160000e-02
  -1.9930000e-02
   1.8210000e-02
   3.7300000e-03
   8.1680000e-02
   3.8440000e-02
  -7.7000000e-04
  -2.4240000e-02
  -2.5330000e-02
   3.7650000e-02
  -5.7990000e-02
  -2.9560000e-02
  -4.7980000e-02
   6.7120000e-02
  -1.5400000e-03
  -1.0700000e-03
  -1.8970000e-02
   3.1640000e-02
   4.7630000e-02
   1.1540000e-02
  -2.7000000e-04
   5.4040000e-02
   8.5000000e-03
   1.8010000e-02
  -3.2490000e-02
  -5.5800000e-02
   1.1500000e-03
  -1.6180000e-02
   5.8100000e-03
  -1.0833000e-01
   2.1330000e-02
   4.1260000e-02
  -6.3470000e-02
  -3.3120000e-02
   2.9610000e-02
   3.6160000e-02
  -1.3846000e-01
   3.6440000e-02
   2.3660000e-02
  -6.6900000e-03
  -1.0310000e-02
  -1.5930000e-02
   5.4450000e-02
   4.6090000e-02
  -7.8000000e-02
  -4.5100000e-02
   4.8450000e-02
   5.1630000e-02
  -4.4200000e-02
   8.8600000e-03
   3.1940000e-02
  -5.4600000e-03
  -4.7710000e-02
   1.4670000e-02
   7.3810000e-02
   2.6950000e-02
  -8.5520000e-02
   7.2900000e-03
   7.2710000e-02
   5.5100000e-03
  -7.6200000e-02
  -4.3270000e-02
  -7.2100000e-03
   2.1800000e-02
  -3.7970000e-02
  -4.9960000e-02
   5.0420000e-02
   1.7030000e-02
   2.3800000e-02
  -2.7990000e-02
   1.4040000e-02
   5.9310000e-02
   6.4200000e-03
  -2.5990000e-02
  -9.3200000e-03
   1.6200000e-02
  -5.2010000e-02
   3.5340000e-02
  -1.7850000e-02
  -1.3540000e-02
   1.5880000e-02
  -4.9100000e-03
   5.9740000e-02
   3.3860000e-02
  -7.3540000e-02
  -2.0210000e-02
   2.0120000e-02
   5.4840000e-02
   8.5000000e-04
  -3.9500000e-03
  -2.1500000e-02
  -6.7890000e-02
   2.1880000e-02
  -6.2200000e-03
  -4.9960000e-02
  -2.5390000e-02
   8.4610000e-02
  -3.9510000e-02
  -4.4230000e-02
   4.2110000e-02
  -2.6680000e-02
  -5.5820000e-02
   5.5490000e-02
   4.0360000e-02
   3.2790000e-02
  -5.8240000e-02
  -5.2070000e-02
   1.4935000e-01
   2.2840000e-02
  -1.1845000e-01
   2.2130000e-02
   4.7680000e-02
   3.7320000e-02
  -1.6260000e-02
  -2.2590000e-02
  -2.1850000e-02
  -3.5400000e-03
   1.7500000e-03
  -8.4610000e-02
   5.3790000e-02
   1.0090000e-02
  -8.5680000e-02
   6.6490000e-02
  -1.6510000e-02
  -4.8560000e-02
   8.6900000e-03
  -2.5030000e-02
  -1.9000000e-02
   5.0070000e-02
  -3.9210000e-02
  -8.4670000e-02
   6.0350000e-02
   7.6800000e-02
   1.2390000e-02
  -7.5370000e-02
   5.7170000e-02
   6.6710000e-02
   1.9520000e-02
  -1.1500000e-03
  -3.3450000e-02
   9.1520000e-02
  -3.7650000e-02
  -7.4900000e-03
   1.2120000e-02
  -3.2460000e-02
   2.7360000e-02
  -8.7930000e-02
   3.7840000e-02
  -3.0200000e-03
  -7.1600000e-03
   2.1250000e-02
  -1.1148000e-01
   2.7860000e-02
   2.0600000e-03
   1.5100000e-03
   1.0910000e-02
   1.8670000e-02
  -2.6900000e-02
  -1.5820000e-02
   5.8100000e-03
   9.3000000e-04
  -4.2470000e-02
   4.4750000e-02
   6.1420000e-02
  -2.4650000e-02
  -1.5660000e-02
  -2.5280000e-02
   6.8160000e-02
  -2.7140000e-02
  -4.8040000e-02
  -2.1000000e-02
  -8.0300000e-03
   7.3100000e-02
  -1.0049000e-01
  -1.2300000e-03
   1.4477000e-01
  -6.7280000e-02
  -6.7040000e-02
   4.6970000e-02
   3.2190000e-02
  -2.1400000e-03
  -7.0520000e-02
   1.2600000e-03
   1.0589000e-01
  -4.0990000e-02
  -3.7100000e-02
  -1.8890000e-02
   4.6640000e-02
   1.6830000e-02
  -1.1974000e-01
  -1.3270000e-02
   6.1910000e-02
   8.1460000e-02
  -1.3418000e-01
   9.4300000e-03
   5.6540000e-02
  -4.1920000e-02
  -1.1710000e-02
  -1.2686000e-01
   1.6330000e-01
   4.4550000e-02
  -1.2837000e-01
   3.1860000e-02
  -2.6050000e-02
   8.8830000e-02
  -7.5100000e-02
  -5.5380000e-02
   7.4500000e-02
  -3.3500000e-02
   1.8320000e-02
  -9.7100000e-03
   2.7340000e-02
  -1.5600000e-03
  -5.3550000e-02
   8.4700000e-03
   6.0840000e-02
  -5.3740000e-02
   1.5110000e-02
  -4.3620000e-02
  -9.8200000e-03
   2.0620000e-02
  -8.3600000e-03
  -5.2750000e-02
   2.8350000e-02
   6.0300000e-03
   1.0470000e-02
  -4.6910000e-02
  -1.0040000e-02
   2.0650000e-02
  -5.0000000e-05
   8.9100000e-03
   2.2260000e-02
  -1.0644000e-01
   1.1806000e-01
   1.0644000e-01
  -1.5924000e-01
   1.8210000e-02
   6.8080000e-02
  -1.7740000e-02
  -1.5930000e-02
  -4.6250000e-02
   5.5270000e-02
  -2.4350000e-02
  -3.7230000e-02
   7.5900000e-03
  -2.2650000e-02
   2.1930000e-02
  -5.6430000e-02
  -4.7210000e-02
  -3.9350000e-02
   7.6770000e-02
   1.3350000e-02
  -7.1230000e-02
   5.6780000e-02
  -2.2810000e-02
   3.0850000e-02
   3.8280000e-02
  -4.5000000e-03
   3.2600000e-03
   1.7500000e-03
   7.3370000e-02
  -1.8840000e-02
  -3.2680000e-02
  -3.4000000e-03
   3.5810000e-02
   5.0150000e-02
  -2.1690000e-02
   1.3000000e-02
   2.2000000e-04
   3.9070000e-02
  -7.0080000e-02
  -6.3560000e-02
   1.2750000e-02
  -1.0287000e-01
  -5.6340000e-02
   2.4920000e-02
  -1.2060000e-02
  -1.8320000e-02
   8.5000000e-04
   2.7500000e-02
   1.4610000e-02
   2.0700000e-02
   3.3560000e-02
   2.8870000e-02
  -2.0540000e-02
   1.7050000e-02
   4.2220000e-02
  -4.7900000e-02
  -5.7740000e-02
  -2.7880000e-02
  -4.3600000e-03
  -1.8070000e-02
   5.0530000e-02
   4.4440000e-02
  -6.9420000e-02
  -3.6440000e-02
   5.7390000e-02
   3.8170000e-02
  -2.9670000e-02
  -1.4000000e-04
   5.6230000e-02
   4.8580000e-02
  -1.4700000e-02
   1.4200000e-02
   6.5300000e-03
  -6.6080000e-02
   4.9000000e-04
   2.0840000e-02
  -1.3608000e-01
   5.4120000e-02
  -8.5000000e-03
  -3.0790000e-02
  -9.5550000e-02
  -2.9600000e-03
   3.0270000e-02
   6.4210000e-02
  -9.8700000e-03
   1.3080000e-02
   6.5860000e-02
  -4.7630000e-02
   3.5420000e-02
   4.4170000e-02
   5.5470000e-02
   1.0120000e-02
  -1.6290000e-02
  -3.8000000e-04
   7.6500000e-02
  -3.1200000e-02
  -1.1340000e-01
  -3.2550000e-02
   5.7820000e-02
  -1.4700000e-02
  -5.9220000e-02
  -3.2630000e-02
   2.7990000e-02
   1.2720000e-02
  -5.1790000e-02
  -4.2470000e-02
   7.1000000e-03
   1.2440000e-01
  -4.7710000e-02
  -7.6690000e-02
  -7.4000000e-04
   8.7500000e-03
  -8.1540000e-02
  -5.2730000e-02
   9.6950000e-02
   5.5300000e-02
  -7.7540000e-02
   1.0990000e-02
   1.1776000e-01
  -3.8360000e-02
  -5.1850000e-02
  -2.2980000e-02
   9.3740000e-02
   5.2070000e-02
  -1.2505000e-01
  -6.8000000e-03
  -3.7600000e-03
   7.2250000e-02
  -6.7700000e-02
  -2.2840000e-02
   9.3580000e-02
  -5.0070000e-02
  -5.7330000e-02
  -4.3210000e-02
   9.8790000e-02
  -2.7000000e-04
  -7.3730000e-02
   6.2240000e-02
  -3.1370000e-02
   8.0640000e-02
  -8.7500000e-03
  -3.7430000e-02
  -6.8440000e-02
   6.4700000e-03
  -4.6610000e-02
  -5.5400000e-03
  -1.0060000e-02
  -7.6500000e-03
  -2.6210000e-02
   3.8000000e-04
   1.0054000e-01
   2.5750000e-02
   5.1800000e-03
   7.8420000e-02
   2.6600000e-03
   1.3760000e-02
  -7.5900000e-03
   3.2380000e-02
   5.2730000e-02
   2.5390000e-02
  -3.7290000e-02
  -8.8090000e-02
   4.8310000e-02
  -4.9410000e-02
  -1.7680000e-02
   1.1210000e-02
  -1.0038000e-01
