# Supplementary material for: A Novel Classification Method for Flutter Signals Based on the CNN and STFT
Source: Hindawi journal article supplement (doi:10.1155/2019/9375437), 2019-04-09
Supplement: f1 [file 9375437.f1.zip › 00_25_z15.0_22channel.txt]

   4.1210000e-02
   2.7720000e-02
   9.0800000e-03
   2.1330000e-02
  -7.7890000e-02
  -6.7200000e-03
  -4.9000000e-04
   4.1400000e-03
   2.8730000e-02
  -5.6480000e-02
  -5.5030000e-02
  -4.3320000e-02
   1.1460000e-02
   1.5380000e-02
   2.1660000e-02
   3.4800000e-03
   2.0600000e-03
   5.7390000e-02
   3.2020000e-02
   3.7400000e-02
   3.3370000e-02
  -1.1730000e-02
  -4.3730000e-02
  -4.1980000e-02
  -2.3500000e-02
   1.4450000e-02
   2.1900000e-03
  -3.9210000e-02
  -7.8200000e-02
  -3.4440000e-02
  -6.1400000e-03
   3.1340000e-02
   2.9360000e-02
  -2.4870000e-02
   5.3410000e-02
   3.0630000e-02
   2.5830000e-02
   4.3180000e-02
  -4.7950000e-02
  -9.4300000e-03
  -3.6800000e-02
  -2.9340000e-02
  -2.8870000e-02
  -5.4450000e-02
  -2.6730000e-02
  -2.9600000e-03
   1.0720000e-02
   2.7910000e-02
  -4.3100000e-02
  -3.4000000e-02
  -1.1570000e-02
  -8.3400000e-03
   1.1490000e-02
   2.0300000e-03
  -3.7010000e-02
   4.6600000e-03
   6.5970000e-02
   1.3400000e-03
   4.8170000e-02
  -1.2480000e-02
  -5.0780000e-02
   1.5960000e-02
  -9.1600000e-03
  -1.9580000e-02
  -1.3000000e-02
  -4.0060000e-02
  -2.5880000e-02
   3.2000000e-02
  -2.4920000e-02
  -2.3660000e-02
   2.3470000e-02
  -5.9420000e-02
   3.5810000e-02
   3.6690000e-02
   2.4510000e-02
   4.3510000e-02
  -1.3870000e-02
  -1.7520000e-02
  -1.1800000e-03
  -2.3090000e-02
   2.2460000e-02
  -5.1330000e-02
  -5.2920000e-02
   5.8700000e-03
  -6.4490000e-02
   3.4900000e-02
   1.0090000e-02
  -4.8200000e-02
   5.5520000e-02
  -2.3630000e-02
  -3.0020000e-02
   7.5400000e-03
  -3.0600000e-02
  -1.2600000e-03
   2.2130000e-02
   1.6340000e-02
  -9.2100000e-03
   2.6650000e-02
   3.6700000e-03
  -7.4600000e-03
  -2.4400000e-03
   1.0420000e-02
  -5.0000000e-05
   1.8100000e-02
  -3.1480000e-02
  -4.2310000e-02
  -1.2090000e-02
   3.2400000e-03
   4.8390000e-02
  -2.0620000e-02
  -1.9270000e-02
   9.8400000e-03
   1.0640000e-02
   5.9580000e-02
   3.0820000e-02
   1.1820000e-02
  -1.5080000e-02
   3.1500000e-03
  -4.4500000e-02
  -1.9410000e-02
  -4.1480000e-02
  -2.0070000e-02
  -4.7130000e-02
  -4.3950000e-02
   4.3460000e-02
  -6.7200000e-03
   3.0190000e-02
  -3.2870000e-02
  -7.5730000e-02
   1.7050000e-02
   2.3580000e-02
   3.1810000e-02
   3.2570000e-02
  -6.7970000e-02
  -3.1300000e-03
  -4.3650000e-02
   1.6640000e-02
   1.0530000e-02
  -6.7590000e-02
  -9.6200000e-03
  -7.7350000e-02
  -2.1410000e-02
   2.2100000e-02
  -1.8600000e-03
   4.0830000e-02
  -2.0260000e-02
  -2.7720000e-02
  -1.5270000e-02
   1.3000000e-02
   4.3590000e-02
   3.0900000e-02
  -5.0750000e-02
  -2.1500000e-02
   9.8200000e-03
   1.7050000e-02
   5.8810000e-02
  -2.2950000e-02
  -7.7790000e-02
  -4.0440000e-02
  -9.4000000e-03
   4.8940000e-02
   2.0180000e-02
   8.0900000e-03
  -2.8680000e-02
  -3.8630000e-02
   6.7700000e-03
   1.8230000e-02
   6.1090000e-02
   6.2500000e-03
   1.7000000e-03
   1.9190000e-02
  -2.8300000e-02
   4.6040000e-02
   3.0110000e-02
   2.0510000e-02
  -1.2450000e-02
  -3.8300000e-02
  -3.3260000e-02
  -5.3710000e-02
   4.0770000e-02
  -2.7450000e-02
  -1.6180000e-02
  -1.7770000e-02
  -5.1130000e-02
   1.0280000e-02
   4.1290000e-02
  -1.5930000e-02
  -1.1760000e-02
  -6.7200000e-03
  -3.5420000e-02
   2.4240000e-02
  -7.7000000e-04
  -3.2520000e-02
   1.8420000e-02
  -3.5200000e-02
  -5.8400000e-03
   1.1350000e-02
  -4.3430000e-02
  -8.0300000e-03
   7.2900000e-03
  -4.7200000e-03
   1.3160000e-02
  -1.7990000e-02
  -2.0400000e-02
  -3.8910000e-02
   2.2370000e-02
   3.7890000e-02
  -2.5220000e-02
   3.5070000e-02
  -4.4610000e-02
  -1.0690000e-02
   3.5370000e-02
  -1.1350000e-02
   2.0600000e-03
  -2.4240000e-02
  -5.3200000e-03
  -2.0920000e-02
  -1.1430000e-02
   4.1900000e-03
  -2.1960000e-02
   1.3600000e-02
  -1.0560000e-02
   2.9640000e-02
  -2.2070000e-02
  -2.8000000e-03
  -7.7900000e-03
   2.5170000e-02
   1.7110000e-02
  -3.0200000e-03
  -1.0700000e-03
  -1.9630000e-02
   1.2060000e-02
  -1.5570000e-02
  -7.5700000e-03
  -1.6070000e-02
  -3.4570000e-02
   3.2900000e-03
   2.4700000e-03
   8.8000000e-03
   2.5910000e-02
  -6.4190000e-02
   1.3900000e-02
  -9.1600000e-03
   5.2600000e-03
   4.2360000e-02
  -2.6400000e-02
   1.2280000e-02
  -2.4100000e-02
  -2.2800000e-03
   2.2040000e-02
  -6.0350000e-02
  -3.9200000e-03
  -5.8840000e-02
  -4.0000000e-02
   2.0840000e-02
  -2.1110000e-02
  -1.1240000e-02
  -9.9300000e-03
   1.7440000e-02
   1.4450000e-02
   5.9220000e-02
  -1.6670000e-02
  -1.7110000e-02
   3.0080000e-02
   6.3000000e-04
   2.3390000e-02
   6.2800000e-03
  -3.0740000e-02
  -3.8900000e-03
   1.1460000e-02
   2.9300000e-03
  -1.7740000e-02
   3.8400000e-03
  -2.3770000e-02
  -4.7200000e-03
  -2.5550000e-02
  -2.4210000e-02
  -1.0750000e-02
   1.0250000e-02
  -1.2910000e-02
   3.7780000e-02
   2.9610000e-02
  -1.1210000e-02
  -2.9470000e-02
  -5.5110000e-02
  -1.9500000e-03
   2.6950000e-02
   1.8780000e-02
  -2.4320000e-02
  -8.8150000e-02
  -3.8030000e-02
   5.0400000e-03
   2.2040000e-02
   4.0470000e-02
  -6.1470000e-02
  -5.4750000e-02
  -5.3200000e-03
  -1.1950000e-02
   6.2730000e-02
   5.4800000e-03
  -4.1370000e-02
   2.9600000e-03
  -1.8700000e-02
   1.2150000e-02
   3.0900000e-02
  -3.8300000e-02
  -1.9690000e-02
  -3.3150000e-02
  -3.1120000e-02
   9.8200000e-03
   2.3110000e-02
  -2.3250000e-02
   1.4810000e-02
   9.6200000e-03
   7.4000000e-04
   3.9210000e-02
   1.5980000e-02
   2.5000000e-04
   2.6020000e-02
  -3.2130000e-02
  -3.9800000e-03
  -4.7200000e-03
  -2.0560000e-02
   7.2400000e-03
   2.6430000e-02
  -4.3240000e-02
  -5.2000000e-04
   2.8510000e-02
  -1.4860000e-02
   4.1430000e-02
  -3.9200000e-03
  -5.5140000e-02
   2.7910000e-02
  -8.8300000e-03
   2.2760000e-02
   1.8860000e-02
  -1.7790000e-02
   1.8370000e-02
  -1.5570000e-02
  -1.6810000e-02
  -3.3610000e-02
  -5.4400000e-02
  -5.9500000e-03
  -2.9390000e-02
  -3.7150000e-02
  -1.9550000e-02
  -5.1410000e-02
   4.2110000e-02
   2.6790000e-02
   1.1050000e-02
   4.4060000e-02
   8.9900000e-03
  -1.9190000e-02
   3.0740000e-02
  -2.0480000e-02
  -3.4300000e-03
   2.5800000e-03
  -7.1450000e-02
  -5.2450000e-02
  -2.4620000e-02
  -4.6560000e-02
  -1.0940000e-02
  -6.2210000e-02
  -4.6720000e-02
   2.2870000e-02
   1.0400000e-03
   7.6830000e-02
   1.7440000e-02
   1.0420000e-02
   5.8890000e-02
  -1.4700000e-02
   3.9260000e-02
  -1.3190000e-02
  -5.6430000e-02
  -2.7000000e-04
  -5.2530000e-02
  -6.8500000e-03
  -6.6900000e-03
  -5.3360000e-02
   2.7640000e-02
  -5.5300000e-02
   5.2100000e-03
  -6.1100000e-03
  -3.4300000e-03
   1.0500000e-02
   1.5980000e-02
   2.3420000e-02
   9.6500000e-03
   2.9890000e-02
  -3.7810000e-02
   1.2910000e-02
   4.3000000e-03
  -4.3900000e-02
   4.2720000e-02
  -3.9070000e-02
  -7.8700000e-03
   1.8600000e-03
  -5.7770000e-02
  -1.8070000e-02
   4.2800000e-03
  -5.2100000e-03
  -6.4200000e-03
  -1.3270000e-02
  -1.6180000e-02
   1.1540000e-02
   5.3550000e-02
   3.8710000e-02
   2.0120000e-02
   1.0970000e-02
  -2.1990000e-02
  -1.2480000e-02
  -6.1400000e-03
  -3.6740000e-02
  -5.5380000e-02
  -2.6650000e-02
  -8.5000000e-04
   1.1210000e-02
  -1.6500000e-03
  -4.1100000e-03
   9.5400000e-03
   2.1910000e-02
   1.9580000e-02
   7.1300000e-03
  -1.9960000e-02
  -2.7940000e-02
   5.0090000e-02
   3.7600000e-03
  -1.2580000e-02
   1.1930000e-02
  -7.0820000e-02
   2.4370000e-02
  -1.8100000e-02
  -1.6200000e-02
  -9.6200000e-03
  -2.5060000e-02
  -5.5900000e-03
  -4.0600000e-03
   1.9080000e-02
   9.7100000e-03
   7.6500000e-03
  -2.3900000e-03
  -4.7570000e-02
  -1.3380000e-02
  -3.1010000e-02
  -2.0370000e-02
  -5.0150000e-02
  -4.3840000e-02
  -2.2840000e-02
   4.5500000e-03
   9.4300000e-03
  -2.2210000e-02
   2.2200000e-03
  -4.7200000e-03
  -8.7700000e-03
   3.5510000e-02
  -2.3910000e-02
  -1.8900000e-03
   3.6700000e-03
  -4.4440000e-02
  -1.4800000e-03
  -6.8500000e-03
  -2.7860000e-02
  -6.0000000e-04
  -3.1010000e-02
  -3.2220000e-02
   1.3300000e-02
   8.5000000e-04
   4.8150000e-02
   2.1060000e-02
   1.7900000e-02
   4.4440000e-02
  -2.0560000e-02
   3.0650000e-02
   1.0400000e-03
  -2.5030000e-02
   2.9150000e-02
  -2.6510000e-02
   2.4700000e-03
  -2.5000000e-03
   2.8620000e-02
   2.6900000e-03
  -4.4100000e-03
   8.6600000e-03
  -2.0510000e-02
   4.7100000e-02
   9.0000000e-04
   1.7800000e-03
   1.2300000e-03
   2.1080000e-02
  -4.5500000e-03
  -2.9120000e-02
   7.1000000e-03
  -5.7660000e-02
  -1.6810000e-02
  -3.9700000e-02
  -4.1570000e-02
  -1.0310000e-02
  -1.4750000e-02
  -2.0950000e-02
   9.0200000e-03
  -1.3330000e-02
   2.0480000e-02
   1.8560000e-02
  -1.7300000e-02
   9.1000000e-03
  -3.4000000e-02
  -1.0800000e-02
   1.9440000e-02
   2.5690000e-02
  -3.9890000e-02
  -1.5110000e-02
  -2.6350000e-02
  -8.2300000e-03
   6.3200000e-02
  -2.0840000e-02
  -7.4470000e-02
  -2.8160000e-02
  -6.6430000e-02
   3.9920000e-02
   3.9200000e-03
  -1.2370000e-02
   1.0580000e-02
  -5.5910000e-02
   2.2780000e-02
   8.2000000e-03
   1.3400000e-03
  -1.0250000e-02
  -3.9780000e-02
   1.4000000e-04
  -1.5270000e-02
   7.7600000e-03
   2.2040000e-02
  -2.1170000e-02
   3.8100000e-03
   2.3060000e-02
   2.1990000e-02
   6.4160000e-02
  -4.5000000e-03
  -8.1700000e-03
  -4.3490000e-02
   1.1000000e-03
   6.1140000e-02
   6.8800000e-03
   1.8620000e-02
  -5.8180000e-02
  -7.5700000e-02
   2.0120000e-02
  -2.8600000e-02
   2.7750000e-02
  -1.9520000e-02
  -3.4880000e-02
  -1.6750000e-02
  -3.8900000e-03
   3.2300000e-02
  -2.6430000e-02
  -1.9200000e-03
  -1.5220000e-02
  -1.0120000e-02
   5.0370000e-02
  -2.6100000e-02
   2.2780000e-02
  -4.4440000e-02
  -3.4740000e-02
   8.0600000e-03
  -2.4950000e-02
   8.5000000e-04
   2.3440000e-02
  -2.7860000e-02
  -4.8200000e-02
   5.0700000e-03
   8.4200000e-03
  -6.8500000e-03
   2.5860000e-02
   1.8600000e-03
  -3.8900000e-03
   7.4880000e-02
   4.2390000e-02
  -8.6600000e-03
   3.6930000e-02
  -1.0890000e-02
  -9.4600000e-03
  -2.6050000e-02
  -5.7500000e-02
  -4.3380000e-02
  -4.3510000e-02
   2.8620000e-02
  -9.6000000e-03
   2.1220000e-02
  -1.4640000e-02
  -2.0970000e-02
   2.4570000e-02
   1.4970000e-02
   2.0320000e-02
   3.5670000e-02
  -2.3250000e-02
  -3.2850000e-02
   3.3640000e-02
  -7.0930000e-02
  -3.2960000e-02
  -4.6360000e-02
  -8.8510000e-02
   1.5980000e-02
  -1.5520000e-02
   9.0200000e-03
   1.7110000e-02
  -2.6050000e-02
   1.1840000e-02
   8.6100000e-03
   5.2310000e-02
  -4.4700000e-03
   2.0810000e-02
  -4.0660000e-02
  -2.7340000e-02
   3.6960000e-02
  -3.9240000e-02
  -5.7300000e-03
  -2.3960000e-02
  -4.9760000e-02
  -3.2870000e-02
   2.3140000e-02
  -2.0730000e-02
   8.8000000e-04
  -1.0200000e-02
  -1.8320000e-02
   3.8190000e-02
   2.8870000e-02
   8.8000000e-04
   1.6700000e-02
   7.8100000e-03
  -5.1850000e-02
  -1.2010000e-02
   2.1080000e-02
   9.5100000e-03
   3.8030000e-02
  -1.1870000e-02
  -2.8080000e-02
  -1.2780000e-02
  -1.4280000e-02
   1.1930000e-02
   5.2100000e-03
   2.9150000e-02
  -3.2400000e-03
   1.7000000e-03
   3.8990000e-02
   4.5710000e-02
   9.3000000e-04
   5.2310000e-02
  -2.5420000e-02
  -5.4700000e-02
  -1.0780000e-02
  -6.8490000e-02
   1.7300000e-02
   4.4000000e-04
  -4.8670000e-02
  -7.5100000e-03
  -3.2410000e-02
  -1.3240000e-02
   2.6050000e-02
  -1.8640000e-02
   4.2500000e-03
  -2.7990000e-02
  -1.7300000e-03
  -2.0370000e-02
   3.0700000e-03
   6.5000000e-03
  -2.9060000e-02
   2.5580000e-02
  -4.3790000e-02
  -4.5820000e-02
  -1.5300000e-02
  -7.7900000e-03
   4.7380000e-02
   5.8100000e-03
  -3.1890000e-02
  -1.2970000e-02
  -3.4930000e-02
   1.5330000e-02
   1.9740000e-02
  -3.4960000e-02
   8.0100000e-03
  -5.2700000e-02
   8.8000000e-03
   4.4390000e-02
   7.2700000e-03
   6.1360000e-02
  -3.6800000e-02
  -7.5400000e-03
   8.1400000e-03
  -6.0240000e-02
   3.8960000e-02
  -5.8730000e-02
  -2.3520000e-02
   3.2520000e-02
  -1.6400000e-02
   2.5310000e-02
   9.2400000e-03
  -1.8320000e-02
   5.6540000e-02
   5.3700000e-03
   1.0830000e-02
   3.2600000e-03
   8.3400000e-03
   2.1610000e-02
   4.1700000e-03
  -8.4400000e-03
  -3.5450000e-02
   2.2000000e-04
  -1.8700000e-02
   2.1660000e-02
  -5.5000000e-04
  -4.6310000e-02
  -1.3190000e-02
   4.4000000e-04
  -4.8300000e-03
   6.3990000e-02
  -2.3990000e-02
  -3.4820000e-02
   3.7600000e-03
  -6.7890000e-02
   2.2430000e-02
   1.0390000e-02
  -6.3300000e-03
   9.4900000e-03
  -9.3500000e-03
  -7.2900000e-03
   2.6510000e-02
   4.0720000e-02
  -1.1710000e-02
   3.0190000e-02
  -4.1290000e-02
  -5.1220000e-02
   1.2040000e-02
  -5.4480000e-02
   5.0000000e-05
  -2.9360000e-02
  -4.7870000e-02
   1.6340000e-02
   4.0300000e-03
   3.8990000e-02
   7.7900000e-03
   1.4090000e-02
   9.9300000e-03
   8.5800000e-03
   3.3640000e-02
   1.2390000e-02
  -1.8150000e-02
  -3.9870000e-02
  -2.7100000e-03
  -1.6450000e-02
  -9.5100000e-03
  -2.0920000e-02
  -4.7190000e-02
   1.8600000e-03
  -1.2890000e-02
   2.5660000e-02
  -4.4700000e-03
  -3.6360000e-02
  -5.2100000e-03
  -1.9490000e-02
   3.1700000e-02
   6.0300000e-03
  -1.5350000e-02
   2.0670000e-02
  -2.4840000e-02
   2.1610000e-02
  -2.8500000e-03
  -8.4700000e-03
   3.0380000e-02
  -5.0180000e-02
  -1.1190000e-02
  -2.8790000e-02
  -1.8320000e-02
   2.9300000e-03
  -2.0920000e-02
  -3.5070000e-02
  -3.2410000e-02
   1.8590000e-02
   1.8040000e-02
   2.5940000e-02
   1.5930000e-02
  -1.6890000e-02
  -1.8900000e-03
   4.5620000e-02
  -1.2120000e-02
   2.7610000e-02
  -2.9780000e-02
  -2.3580000e-02
   3.1390000e-02
  -2.3250000e-02
  -1.4230000e-02
   2.6320000e-02
  -5.8840000e-02
  -2.9690000e-02
   1.7000000e-03
  -6.8800000e-03
   7.1120000e-02
  -3.4030000e-02
   9.4600000e-03
  -2.1440000e-02
   2.5280000e-02
   8.1710000e-02
   1.0970000e-02
   3.5530000e-02
  -4.2360000e-02
  -2.5800000e-03
  -1.4000000e-04
  -4.0220000e-02
   4.2830000e-02
  -6.1220000e-02
  -4.6940000e-02
  -2.4540000e-02
  -2.5990000e-02
   1.4940000e-02
   4.6450000e-02
  -8.3900000e-03
  -4.1540000e-02
  -2.0920000e-02
   2.4590000e-02
   3.8060000e-02
   2.7400000e-03
   1.7880000e-02
  -5.6120000e-02
  -2.6810000e-02
  -3.4660000e-02
  -1.9190000e-02
   2.5880000e-02
   1.5790000e-02
  -2.4590000e-02
  -5.4510000e-02
  -4.3020000e-02
  -1.1020000e-02
   4.5510000e-02
   2.7990000e-02
  -2.3610000e-02
  -4.6940000e-02
  -2.5330000e-02
   7.6500000e-03
   9.1300000e-03
   3.5450000e-02
  -8.7200000e-03
  -1.8900000e-03
  -5.5100000e-03
  -4.3180000e-02
   7.5900000e-03
   6.0000000e-03
   2.8650000e-02
   8.0300000e-03
  -2.7690000e-02
  -4.6560000e-02
   3.1500000e-03
   1.0250000e-02
   5.2340000e-02
   1.7330000e-02
  -1.9700000e-03
   8.6600000e-03
  -1.0700000e-03
   1.5770000e-02
  -2.0870000e-02
  -5.0700000e-02
  -1.5030000e-02
  -3.0600000e-02
  -4.8300000e-03
   2.4810000e-02
  -2.1610000e-02
   1.7380000e-02
  -7.9800000e-03
  -3.3940000e-02
   3.0200000e-03
   3.5970000e-02
   1.7520000e-02
   2.0180000e-02
  -6.5230000e-02
  -1.9060000e-02
  -3.0080000e-02
   1.5130000e-02
   4.7380000e-02
  -2.0780000e-02
   1.8450000e-02
  -3.1830000e-02
  -4.2500000e-02
  -1.0800000e-02
   1.9410000e-02
   3.9260000e-02
   2.2460000e-02
   3.0000000e-05
  -2.6510000e-02
  -2.2870000e-02
   2.5280000e-02
  -1.7030000e-02
   1.0610000e-02
  -5.1220000e-02
  -3.1450000e-02
   2.2480000e-02
  -5.8240000e-02
  -2.3900000e-03
   4.8000000e-03
  -3.1500000e-02
   3.7860000e-02
  -1.7300000e-03
  -3.3560000e-02
   6.5800000e-03
   3.1010000e-02
   3.4190000e-02
   2.7100000e-03
  -9.8400000e-03
  -5.0830000e-02
  -9.7100000e-03
   2.0510000e-02
   6.6900000e-03
  -2.1880000e-02
  -3.5670000e-02
  -2.8500000e-03
  -3.9150000e-02
   3.5810000e-02
   4.7840000e-02
  -2.3220000e-02
   3.4300000e-03
  -3.6820000e-02
  -3.2680000e-02
   5.1570000e-02
  -2.8800000e-03
  -6.0000000e-03
  -3.2790000e-02
  -6.4790000e-02
  -1.6200000e-02
   1.9600000e-02
  -1.9500000e-03
  -3.3400000e-02
  -3.0900000e-02
  -3.3040000e-02
  -3.6740000e-02
  -1.2800000e-02
   8.3100000e-03
   2.2040000e-02
   3.6550000e-02
  -3.1640000e-02
  -2.9310000e-02
   2.3030000e-02
  -1.9710000e-02
   3.8470000e-02
  -2.5800000e-02
  -2.3660000e-02
  -8.2500000e-03
   3.4000000e-03
   3.1910000e-02
  -2.1850000e-02
   3.2440000e-02
  -9.9300000e-03
  -3.3500000e-03
   5.4400000e-02
  -2.6270000e-02
  -3.1810000e-02
   3.1560000e-02
  -4.0520000e-02
  -7.1000000e-03
   5.4370000e-02
  -4.7460000e-02
   7.7300000e-03
   8.3600000e-03
  -4.1290000e-02
   2.3390000e-02
   1.1160000e-02
  -2.6300000e-03
   1.0500000e-02
  -1.9080000e-02
  -7.5100000e-03
  -4.5000000e-03
  -1.8370000e-02
  -2.0800000e-03
  -7.7900000e-03
   5.5000000e-04
  -3.1940000e-02
  -4.3600000e-03
   1.4230000e-02
  -2.9890000e-02
   4.8500000e-03
  -3.6300000e-02
  -4.8500000e-03
   8.6400000e-03
  -4.6010000e-02
   1.0720000e-02
  -2.8570000e-02
   1.5350000e-02
   1.2260000e-02
  -3.1170000e-02
   3.0740000e-02
  -4.4170000e-02
  -5.8700000e-03
   1.8900000e-03
   5.2100000e-03
   5.4230000e-02
  -4.2910000e-02
  -2.8350000e-02
  -6.3830000e-02
  -2.8710000e-02
   4.5510000e-02
  -2.3550000e-02
   3.0000000e-04
  -4.1290000e-02
  -4.8910000e-02
   1.9880000e-02
   9.6800000e-03
   5.2120000e-02
  -8.7700000e-03
   2.6300000e-03
   4.9000000e-02
  -6.3340000e-02
   5.9110000e-02
  -5.4600000e-03
  -2.3990000e-02
   5.7610000e-02
  -7.0000000e-02
  -3.1000000e-03
   3.6500000e-03
  -4.2090000e-02
   1.1210000e-02
  -6.8000000e-03
  -2.0430000e-02
   3.0570000e-02
   3.0200000e-03
   4.0090000e-02
  -1.7050000e-02
   3.0820000e-02
  -3.7000000e-03
  -1.5600000e-02
   2.6570000e-02
  -6.2600000e-02
   1.2010000e-02
  -4.7320000e-02
  -3.2270000e-02
   1.5820000e-02
  -2.0430000e-02
   5.8100000e-03
  -1.9470000e-02
  -9.5100000e-03
  -3.7700000e-02
  -9.4000000e-03
  -1.4230000e-02
  -2.3420000e-02
   4.0090000e-02
   8.2800000e-03
  -2.8000000e-03
   1.8700000e-02
  -3.7480000e-02
   3.5120000e-02
   2.1910000e-02
  -8.9700000e-03
   3.0700000e-03
  -6.3830000e-02
  -6.8300000e-03
   2.5000000e-03
   9.9300000e-03
  -2.5990000e-02
  -1.8900000e-03
  -3.7480000e-02
   5.1800000e-03
   2.9040000e-02
   2.2510000e-02
  -1.4000000e-04
   2.1850000e-02
   1.1270000e-02
  -3.1420000e-02
   2.0260000e-02
  -1.4800000e-03
  -2.6600000e-03
  -2.5330000e-02
  -6.7260000e-02
  -5.8900000e-03
   2.7060000e-02
  -9.4300000e-03
   6.9000000e-04
  -4.8450000e-02
  -7.0460000e-02
   3.5370000e-02
  -8.8300000e-03
  -1.4700000e-02
   5.8670000e-02
  -5.6730000e-02
   1.4830000e-02
   5.6100000e-02
  -1.5000000e-02
   1.5790000e-02
   9.4000000e-03
  -4.2690000e-02
  -3.8140000e-02
  -2.3420000e-02
  -5.3660000e-02
  -2.8200000e-03
  -1.2910000e-02
  -5.7470000e-02
   1.6830000e-02
  -2.2460000e-02
   3.2600000e-03
   6.9040000e-02
  -6.3300000e-03
   5.4730000e-02
   2.3000000e-02
   8.0100000e-03
   2.4240000e-02
  -1.2560000e-02
  -9.5700000e-03
  -6.7610000e-02
  -9.2700000e-03
  -1.1100000e-02
  -5.8350000e-02
   2.5140000e-02
  -5.2040000e-02
  -3.0710000e-02
   7.4520000e-02
  -1.2910000e-02
   8.9710000e-02
   2.2020000e-02
  -2.0730000e-02
   3.7890000e-02
  -1.1020000e-02
   5.3790000e-02
   9.6200000e-03
  -2.5000000e-04
  -3.9100000e-02
  -2.1170000e-02
  -2.2810000e-02
  -2.6980000e-02
   1.5980000e-02
  -5.0750000e-02
  -3.3420000e-02
  -1.0360000e-02
  -7.6500000e-03
  -1.4920000e-02
   2.8500000e-03
   5.8100000e-03
  -8.8000000e-04
   2.7880000e-02
  -4.4400000e-03
  -3.4220000e-02
  -2.6870000e-02
  -3.1300000e-03
  -1.2090000e-02
   1.7300000e-02
  -4.0170000e-02
  -5.1240000e-02
  -2.1400000e-03
  -2.9780000e-02
  -1.4920000e-02
   7.6500000e-03
  -3.4550000e-02
   2.1850000e-02
   2.4100000e-03
  -1.8600000e-03
   1.6620000e-02
  -2.2240000e-02
   3.9760000e-02
  -3.0900000e-02
  -2.9800000e-02
  -1.1100000e-02
  -4.2740000e-02
   1.4920000e-02
   1.3380000e-02
  -3.8930000e-02
  -7.1800000e-03
   2.2320000e-02
  -2.7770000e-02
   5.4120000e-02
  -1.2480000e-02
  -3.2930000e-02
   1.7190000e-02
  -1.0280000e-02
   5.5930000e-02
   2.5800000e-03
   1.2720000e-02
  -1.0060000e-02
  -5.5250000e-02
   2.8460000e-02
   1.7220000e-02
  -2.6790000e-02
   3.4000000e-03
  -4.9870000e-02
  -3.0960000e-02
   2.8790000e-02
  -1.8420000e-02
   6.2350000e-02
  -3.8520000e-02
  -4.4800000e-02
   2.1410000e-02
  -2.2210000e-02
   1.4610000e-02
   1.2090000e-02
  -2.4430000e-02
  -1.6000000e-04
   2.0020000e-02
  -2.4160000e-02
  -4.7650000e-02
   8.5500000e-03
  -4.0500000e-02
  -4.3000000e-03
   3.5900000e-03
  -4.5460000e-02
   6.7400000e-03
   8.3600000e-03
   4.5680000e-02
   5.6020000e-02
  -5.2100000e-03
   5.8700000e-03
   2.4180000e-02
   1.1320000e-02
   4.3490000e-02
  -1.8600000e-03
  -5.9800000e-02
  -1.0780000e-02
  -6.1880000e-02
  -4.4500000e-02
  -1.0280000e-02
  -4.7300000e-02
  -1.0670000e-02
  -5.6450000e-02
  -2.5830000e-02
   4.4660000e-02
   2.2590000e-02
   1.0260000e-01
   3.8690000e-02
   1.1760000e-02
   2.6460000e-02
   2.5470000e-02
   1.0400000e-03
  -7.9000000e-03
  -8.6600000e-03
  -5.7470000e-02
  -6.2100000e-02
  -8.3430000e-02
  -4.2280000e-02
   1.6420000e-02
  -4.5570000e-02
   1.0200000e-02
  -2.2840000e-02
  -1.9770000e-02
   7.8200000e-02
   4.4280000e-02
   3.6000000e-02
  -1.0800000e-02
  -5.1410000e-02
   1.0990000e-02
  -2.0700000e-02
  -2.0600000e-03
  -3.5700000e-02
  -5.5080000e-02
  -3.6110000e-02
  -1.0040000e-02
  -3.4460000e-02
  -4.2280000e-02
   4.7400000e-03
  -3.1170000e-02
  -1.8100000e-02
   6.8220000e-02
  -5.0000000e-05
   4.6560000e-02
   5.9140000e-02
  -7.9200000e-03
   3.2980000e-02
  -4.6600000e-03
  -3.4790000e-02
  -1.3570000e-02
  -5.9720000e-02
  -1.3050000e-02
  -1.9660000e-02
   2.9970000e-02
   5.2100000e-03
  -3.7100000e-02
   2.9890000e-02
  -5.2090000e-02
   5.8900000e-03
   8.5630000e-02
  -5.8730000e-02
   3.9320000e-02
   1.1080000e-02
  -9.8700000e-03
   9.9120000e-02
   1.6340000e-02
  -1.3850000e-02
  -5.3740000e-02
  -7.1150000e-02
  -6.7200000e-03
  -1.6940000e-02
   3.1910000e-02
  -8.1200000e-03
  -5.7060000e-02
   4.1650000e-02
  -4.5790000e-02
   5.3790000e-02
   3.0820000e-02
  -2.5940000e-02
   1.2420000e-02
  -5.9580000e-02
   3.6140000e-02
   4.7700000e-03
  -9.9300000e-03
  -4.3210000e-02
  -5.6760000e-02
  -3.0000000e-02
  -1.6010000e-02
  -5.0400000e-03
  -2.1080000e-02
  -5.2070000e-02
   3.8690000e-02
   2.8200000e-03
   4.1590000e-02
   4.8090000e-02
  -3.6690000e-02
  -1.6200000e-02
  -3.7370000e-02
  -4.0190000e-02
  -4.4100000e-03
  -1.7440000e-02
  -1.5710000e-02
   1.3870000e-02
   2.4400000e-03
   1.8400000e-02
  -9.9000000e-04
  -2.6300000e-03
  -2.1520000e-02
  -1.7660000e-02
   2.4480000e-02
  -2.1500000e-02
   4.4030000e-02
   1.4800000e-03
  -2.8410000e-02
   4.0000000e-03
  -4.4550000e-02
   3.1300000e-03
  -1.4280000e-02
  -4.7680000e-02
  -2.4650000e-02
  -1.1080000e-02
   8.0100000e-03
   3.1890000e-02
   2.8430000e-02
  -3.7040000e-02
  -2.4480000e-02
  -1.7990000e-02
  -3.1310000e-02
   8.8670000e-02
   1.0970000e-02
   2.3110000e-02
  -1.9520000e-02
  -5.3000000e-02
   3.1670000e-02
  -1.1080000e-02
   5.9200000e-03
  -6.4410000e-02
  -5.5250000e-02
  -2.9580000e-02
  -2.0620000e-02
   9.1600000e-03
   2.7450000e-02
   1.9250000e-02
   3.1610000e-02
   2.3800000e-02
  -2.1930000e-02
  -1.4560000e-02
   1.0280000e-02
  -3.8960000e-02
   1.4150000e-02
  -1.8730000e-02
  -6.3340000e-02
   4.2740000e-02
   1.1240000e-02
   2.4400000e-02
   9.7600000e-03
  -3.6000000e-02
  -2.7700000e-03
   1.4000000e-04
   4.1400000e-02
  -1.6730000e-02
  -6.6900000e-03
   2.2500000e-03
  -7.7320000e-02
   3.3610000e-02
  -2.2780000e-02
  -4.4910000e-02
   3.5890000e-02
  -4.5050000e-02
   2.0560000e-02
   5.1490000e-02
   1.3570000e-02
   9.3500000e-03
  -1.3540000e-02
  -1.8400000e-02
  -1.6400000e-02
   1.1200000e-03
  -3.4900000e-02
  -4.2830000e-02
   1.1820000e-02
  -5.5100000e-03
  -3.6000000e-04
   3.7860000e-02
  -3.9760000e-02
  -1.7580000e-02
   1.1600000e-02
  -4.8720000e-02
   1.5960000e-02
  -1.6150000e-02
  -3.7700000e-02
  -7.1600000e-03
  -5.0750000e-02
  -1.0970000e-02
   2.7090000e-02
   2.3280000e-02
   3.0600000e-02
  -2.1170000e-02
  -3.5370000e-02
  -4.3600000e-03
   4.2960000e-02
   3.7450000e-02
   1.2610000e-02
  -4.7760000e-02
  -9.5520000e-02
  -6.0070000e-02
  -7.5400000e-03
   7.9200000e-03
   6.2800000e-03
  -3.2680000e-02
  -6.4200000e-03
   1.1410000e-02
   4.7540000e-02
   5.9850000e-02
   1.1410000e-02
  -1.0750000e-02
  -4.7410000e-02
   2.9900000e-03
   2.2290000e-02
   4.4120000e-02
   2.5880000e-02
  -5.0890000e-02
  -2.9500000e-02
  -5.3330000e-02
  -2.5000000e-04
   3.1310000e-02
   6.4700000e-03
  -7.4000000e-03
  -3.7540000e-02
   2.7830000e-02
   4.6940000e-02
   5.0670000e-02
   2.9890000e-02
  -2.9580000e-02
  -1.4180000e-02
   2.9600000e-03
  -1.0670000e-02
  -1.9140000e-02
  -2.2780000e-02
  -5.5710000e-02
  -8.5800000e-03
  -3.3450000e-02
   1.2450000e-02
   2.4840000e-02
  -2.1330000e-02
   1.4860000e-02
  -4.1180000e-02
   6.0000000e-04
   2.4320000e-02
   4.7840000e-02
   2.7940000e-02
  -2.2070000e-02
   3.1720000e-02
  -2.2810000e-02
  -3.0300000e-02
   6.1400000e-03
  -8.0550000e-02
   2.7000000e-04
  -2.5200000e-02
  -1.2420000e-02
  -2.3220000e-02
   1.3960000e-02
   3.6360000e-02
  -4.1920000e-02
   1.0970000e-02
   5.7600000e-03
  -2.6240000e-02
   4.2740000e-02
  -2.1660000e-02
  -2.9300000e-03
   3.6200000e-03
   6.6900000e-03
  -9.4600000e-03
  -5.8700000e-03
  -6.5910000e-02
  -4.6230000e-02
  -1.1630000e-02
  -3.8580000e-02
   3.1910000e-02
   1.6750000e-02
   6.2500000e-03
   2.5690000e-02
   1.9410000e-02
  -1.5770000e-02
   6.2000000e-03
   4.4100000e-03
  -8.2360000e-02
   1.6400000e-02
  -2.8410000e-02
  -8.9700000e-03
   5.9550000e-02
  -9.1300000e-03
  -2.5000000e-03
  -2.0070000e-02
  -3.7600000e-03
  -4.1240000e-02
  -6.0050000e-02
   3.3200000e-02
  -3.8600000e-02
   5.0590000e-02
   4.1320000e-02
  -6.2430000e-02
   4.3540000e-02
   6.0900000e-03
   1.2340000e-02
   2.4320000e-02
  -8.4890000e-02
  -3.4250000e-02
   5.8870000e-02
  -1.4300000e-03
   4.6860000e-02
  -2.6980000e-02
  -9.7170000e-02
  -1.8400000e-02
  -1.2670000e-02
   6.6000000e-04
   2.4270000e-02
   1.6620000e-02
  -1.0580000e-02
  -6.4700000e-03
   6.2570000e-02
   1.0500000e-02
   4.2770000e-02
   9.6800000e-03
  -7.2900000e-02
   1.9300000e-02
   1.3540000e-02
   1.0970000e-02
   3.9260000e-02
  -6.2020000e-02
  -2.0150000e-02
  -1.1210000e-02
  -2.9780000e-02
  -2.6160000e-02
  -4.2610000e-02
  -2.5120000e-02
  -4.4530000e-02
   2.6980000e-02
   1.2860000e-02
   5.2100000e-03
   5.6340000e-02
  -3.8190000e-02
  -1.6290000e-02
   2.6300000e-03
  -5.1300000e-02
   3.3590000e-02
  -2.2240000e-02
  -5.2620000e-02
  -2.2240000e-02
  -3.6300000e-02
  -1.4000000e-03
   1.8040000e-02
  -2.8790000e-02
  -6.4950000e-02
  -2.1580000e-02
  -1.4500000e-03
   2.9040000e-02
   4.2610000e-02
  -8.1400000e-03
   1.2900000e-03
   3.4520000e-02
  -6.7400000e-03
   3.2520000e-02
  -9.8200000e-03
  -4.8500000e-02
   1.6070000e-02
  -4.2110000e-02
   1.2640000e-02
   3.9730000e-02
  -4.3700000e-02
  -1.9440000e-02
  -5.5690000e-02
  -3.5920000e-02
   1.5130000e-02
   4.2440000e-02
  -4.0850000e-02
   4.4100000e-03
   3.0000000e-04
  -2.0600000e-03
   8.2560000e-02
  -4.9400000e-03
  -7.2100000e-03
  -8.1700000e-03
  -3.0710000e-02
  -5.4300000e-03
  -8.0000000e-04
  -2.0040000e-02
  -3.8170000e-02
   1.9550000e-02
  -4.3900000e-03
   3.9800000e-03
   3.4220000e-02
  -1.7490000e-02
   1.1460000e-02
   3.4660000e-02
  -1.7220000e-02
   1.4340000e-02
   1.2610000e-02
  -1.7050000e-02
   2.0430000e-02
   2.0870000e-02
   8.2000000e-04
  -4.5980000e-02
  -5.2070000e-02
  -6.1250000e-02
  -2.2100000e-02
   4.3460000e-02
   7.4000000e-03
  -2.4950000e-02
  -2.3280000e-02
  -3.4710000e-02
  -2.9600000e-03
   2.9360000e-02
   2.1060000e-02
  -5.4600000e-03
  -7.1800000e-03
  -2.1660000e-02
  -1.9170000e-02
   1.1540000e-02
  -1.0940000e-02
   4.2800000e-03
  -1.5490000e-02
  -7.8770000e-02
   7.6800000e-03
  -4.9400000e-03
   1.9500000e-03
   4.6390000e-02
  -1.0970000e-02
  -3.5100000e-03
   2.0290000e-02
  -2.4070000e-02
   1.0640000e-02
  -1.5740000e-02
  -8.7200000e-03
  -1.8120000e-02
  -4.8120000e-02
   3.1280000e-02
   1.7270000e-02
  -2.9390000e-02
   2.6600000e-02
  -6.3800000e-02
   8.6900000e-03
   4.2500000e-03
  -1.0280000e-02
   2.9260000e-02
  -2.2780000e-02
  -2.2950000e-02
   1.5710000e-02
   3.3720000e-02
  -1.2100000e-03
   3.6200000e-03
   6.6900000e-03
  -7.4250000e-02
  -1.0310000e-02
   5.5700000e-03
  -1.4150000e-02
   6.7280000e-02
  -4.8890000e-02
  -6.7860000e-02
   4.7200000e-03
  -1.8840000e-02
   4.5320000e-02
   3.3670000e-02
  -9.2900000e-03
   1.5160000e-02
   2.9750000e-02
  -1.8620000e-02
   5.9910000e-02
   1.3630000e-02
  -2.0400000e-02
  -5.2100000e-03
  -8.7630000e-02
  -3.4570000e-02
   8.3900000e-03
   8.3100000e-03
   3.6140000e-02
  -3.7120000e-02
  -4.0900000e-03
   4.4400000e-03
  -2.2700000e-02
   4.4550000e-02
  -1.8290000e-02
  -2.1630000e-02
  -1.8900000e-03
  -2.6760000e-02
   3.7210000e-02
  -9.0500000e-03
  -1.0990000e-02
  -3.1800000e-03
  -6.5890000e-02
   4.0940000e-02
   6.5800000e-03
  -1.3650000e-02
   2.7660000e-02
   8.8000000e-04
   4.6600000e-03
   3.7480000e-02
   9.0500000e-03
   1.5490000e-02
  -5.7220000e-02
  -1.0200000e-02
  -2.4650000e-02
  -3.2900000e-02
   2.9830000e-02
  -4.0500000e-02
   4.9900000e-03
  -2.9530000e-02
  -1.9800000e-02
  -4.6600000e-03
  -5.4260000e-02
   3.5780000e-02
   4.9900000e-03
  -1.5740000e-02
   4.3570000e-02
  -6.7200000e-02
   3.9500000e-03
   3.0350000e-02
  -3.9510000e-02
   7.7000000e-03
  -3.6000000e-02
  -3.5230000e-02
   3.9650000e-02
   1.6150000e-02
   2.2100000e-02
   2.1910000e-02
  -1.6510000e-02
  -2.2650000e-02
  -2.3990000e-02
   1.4260000e-02
  -3.4440000e-02
  -1.8400000e-02
  -1.4000000e-03
  -3.9450000e-02
   6.2950000e-02
   1.9990000e-02
  -3.4460000e-02
   1.2670000e-02
  -6.5800000e-02
  -6.0000000e-04
   4.2660000e-02
   3.9200000e-03
  -7.1000000e-04
  -5.9500000e-03
  -2.5200000e-03
   5.3200000e-03
   2.3900000e-03
  -5.8000000e-04
  -2.4370000e-02
  -5.0700000e-03
  -1.6620000e-02
   2.3900000e-03
   5.4970000e-02
   2.8410000e-02
   3.2050000e-02
  -1.6860000e-02
  -5.2970000e-02
  -2.5800000e-03
  -2.4480000e-02
   1.1900000e-02
  -3.5560000e-02
  -2.9780000e-02
  -3.7890000e-02
  -1.8970000e-02
   5.5740000e-02
  -2.7170000e-02
  -2.2100000e-02
  -1.0090000e-02
  -3.2790000e-02
   4.5600000e-02
  -1.0450000e-02
   4.7710000e-02
  -6.8800000e-03
  -8.7500000e-03
   5.0010000e-02
  -2.2540000e-02
   2.6620000e-02
   1.7440000e-02
  -7.1400000e-02
   2.1900000e-03
  -6.9180000e-02
  -7.3510000e-02
   1.4150000e-02
  -2.3110000e-02
   1.4860000e-02
  -5.1930000e-02
  -9.0780000e-02
   1.1190000e-02
  -4.2200000e-03
   7.8800000e-02
   5.5330000e-02
   3.9510000e-02
  -2.0800000e-03
   2.1550000e-02
   1.2580000e-02
   2.6320000e-02
   1.7660000e-02
  -6.3310000e-02
  -6.7230000e-02
  -8.3540000e-02
  -1.7680000e-02
   3.3000000e-04
  -1.9300000e-02
  -3.8520000e-02
  -4.1480000e-02
   3.6770000e-02
   6.5000000e-03
   8.0750000e-02
   6.9100000e-03
  -1.9110000e-02
   7.4710000e-02
  -2.5990000e-02
   3.5370000e-02
  -8.1400000e-03
  -5.8070000e-02
  -3.6110000e-02
  -1.9550000e-02
  -1.5980000e-02
  -4.5190000e-02
  -2.2020000e-02
  -6.2620000e-02
   6.8500000e-03
   2.2810000e-02
   2.7700000e-03
   6.2210000e-02
  -1.4420000e-02
   3.3920000e-02
   1.1100000e-02
   3.6700000e-03
   4.7680000e-02
  -4.3510000e-02
  -6.6100000e-03
   1.6290000e-02
  -7.7210000e-02
  -2.6600000e-03
  -4.2200000e-02
  -7.7150000e-02
   5.1850000e-02
  -5.9220000e-02
  -4.9600000e-03
   8.0100000e-03
  -4.2360000e-02
   8.3630000e-02
   1.5160000e-02
   4.4990000e-02
   5.4700000e-02
   1.5930000e-02
   4.1950000e-02
  -3.9070000e-02
   1.3760000e-02
  -5.4100000e-02
   3.3700000e-03
  -2.6600000e-02
  -6.1060000e-02
  -3.4110000e-02
  -6.7970000e-02
  -2.1900000e-03
   7.7000000e-04
  -3.3000000e-04
   6.8500000e-03
  -1.0100000e-03
   1.6510000e-02
   4.6860000e-02
   2.1250000e-02
   3.2220000e-02
  -1.9850000e-02
  -5.9800000e-03
   2.6210000e-02
  -4.7730000e-02
  -2.1500000e-02
  -5.5330000e-02
  -6.8740000e-02
  -1.6010000e-02
  -1.7300000e-03
  -2.7910000e-02
   1.5100000e-03
  -1.3270000e-02
  -2.3880000e-02
   1.5820000e-02
   2.7770000e-02
  -6.7400000e-03
   3.8280000e-02
  -3.1090000e-02
  -1.5900000e-03
   2.1660000e-02
   9.3000000e-04
   1.2530000e-02
  -3.4900000e-02
  -1.7440000e-02
  -2.0450000e-02
   9.3000000e-04
  -1.7330000e-02
  -3.6930000e-02
   2.0870000e-02
   5.4600000e-03
   3.2850000e-02
   3.4110000e-02
  -1.6750000e-02
  -6.3100000e-03
   7.7000000e-03
  -6.4700000e-03
  -5.8000000e-04
   9.6200000e-03
  -2.6840000e-02
   4.7700000e-03
  -4.5240000e-02
   7.0500000e-03
   3.9920000e-02
  -1.3790000e-02
   3.1970000e-02
  -5.8590000e-02
  -3.1610000e-02
  -6.3300000e-03
   1.1100000e-02
   1.2830000e-02
  -2.6350000e-02
  -2.2540000e-02
  -8.6600000e-03
  -1.4000000e-04
   1.4670000e-02
  -2.7230000e-02
   1.2100000e-03
  -6.2800000e-03
  -9.1900000e-03
  -4.7400000e-03
  -5.2070000e-02
   8.0600000e-03
  -2.0920000e-02
  -1.8040000e-02
   1.6590000e-02
  -3.0820000e-02
   5.6800000e-03
   1.9600000e-02
  -1.6970000e-02
   1.2580000e-02
   2.7610000e-02
  -1.0060000e-02
   1.0750000e-02
  -1.4390000e-02
  -6.2050000e-02
  -5.6800000e-03
   3.8820000e-02
   2.8130000e-02
   2.0070000e-02
  -2.4460000e-02
  -3.9040000e-02
  -3.4160000e-02
   5.2600000e-03
  -1.3330000e-02
  -1.7930000e-02
  -3.1230000e-02
  -2.7200000e-02
  -3.5260000e-02
  -2.2670000e-02
   8.4040000e-02
   3.2960000e-02
   5.8900000e-03
   2.8820000e-02
  -3.6580000e-02
   3.8470000e-02
   4.2740000e-02
  -6.3000000e-04
   3.2100000e-03
   1.3000000e-02
  -6.5500000e-03
  -4.4880000e-02
   2.6020000e-02
  -7.2030000e-02
  -5.6540000e-02
  -3.6050000e-02
  -5.1550000e-02
   7.0200000e-03
   5.2400000e-02
  -5.8700000e-03
   1.4670000e-02
   4.9900000e-02
   2.1300000e-02
   6.6870000e-02
  -5.0000000e-05
   3.1300000e-03
  -2.5830000e-02
  -1.6260000e-02
  -2.2810000e-02
   6.5000000e-03
  -3.6000000e-02
  -4.3270000e-02
  -1.5930000e-02
  -9.2120000e-02
  -2.4070000e-02
  -1.6200000e-02
   1.4920000e-02
   4.0060000e-02
   5.5190000e-02
   1.4230000e-02
   1.5680000e-02
   4.4990000e-02
   2.9900000e-03
   4.8580000e-02
   3.2600000e-02
  -4.0610000e-02
  -3.9100000e-02
  -2.1220000e-02
  -2.5690000e-02
   2.8680000e-02
   1.0040000e-02
  -4.8480000e-02
  -3.1720000e-02
  -4.5350000e-02
  -4.7270000e-02
   1.3930000e-02
   1.5520000e-02
   2.9900000e-03
   3.9130000e-02
  -2.2180000e-02
   2.5250000e-02
   6.1280000e-02
  -3.2080000e-02
   6.0000000e-04
  -4.1430000e-02
  -1.3832000e-01
  -2.3910000e-02
  -6.9370000e-02
  -3.1040000e-02
   4.5130000e-02
  -3.0380000e-02
   2.9310000e-02
  -1.7380000e-02
   3.8700000e-03
   3.8630000e-02
   2.0120000e-02
   3.6710000e-02
  -2.8680000e-02
  -3.8770000e-02
  -3.0400000e-03
   1.8890000e-02
   2.3440000e-02
   1.4180000e-02
  -3.3720000e-02
  -4.6470000e-02
  -3.3590000e-02
   2.2130000e-02
  -1.0750000e-02
   3.6630000e-02
   2.0290000e-02
  -6.6820000e-02
   1.8670000e-02
  -2.6350000e-02
  -9.7600000e-03
   6.2920000e-02
  -4.2470000e-02
  -2.5860000e-02
  -4.8560000e-02
  -7.5700000e-03
   5.0780000e-02
   8.0390000e-02
  -3.5400000e-03
  -2.0100000e-02
  -6.9900000e-03
  -1.7600000e-02
   9.9770000e-02
  -5.7000000e-03
  -4.1790000e-02
   1.0910000e-02
  -7.6800000e-02
   2.9720000e-02
   3.0350000e-02
  -3.5730000e-02
   2.5830000e-02
  -2.8540000e-02
  -1.5160000e-02
   1.8700000e-02
  -1.7770000e-02
   2.1550000e-02
   2.1720000e-02
   1.2420000e-02
  -1.4180000e-02
  -8.3900000e-03
  -3.1280000e-02
  -7.4660000e-02
   1.0690000e-02
  -1.8210000e-02
  -6.4200000e-03
   1.5330000e-02
  -3.4880000e-02
   5.8900000e-03
  -2.7360000e-02
   2.3440000e-02
  -1.2560000e-02
  -5.8870000e-02
   4.2800000e-03
  -2.1580000e-02
  -2.7530000e-02
   3.7180000e-02
  -2.8350000e-02
   4.4990000e-02
   4.0520000e-02
  -2.8300000e-02
   2.4760000e-02
  -1.7990000e-02
   8.3600000e-03
   2.1190000e-02
  -4.1210000e-02
  -4.5000000e-03
   3.9800000e-03
   9.0500000e-03
  -4.1540000e-02
  -4.4200000e-02
  -3.0900000e-02
  -2.2460000e-02
   5.8210000e-02
   2.6160000e-02
  -1.4890000e-02
  -9.9300000e-03
   3.1800000e-03
   6.0900000e-03
   1.5930000e-02
   9.5100000e-03
  -6.8550000e-02
  -1.8120000e-02
  -3.5590000e-02
  -3.6470000e-02
   2.4980000e-02
  -3.7540000e-02
  -7.4000000e-03
  -1.3960000e-02
  -2.4790000e-02
  -3.8000000e-04
   4.2720000e-02
   1.8260000e-02
  -1.8180000e-02
   4.0190000e-02
  -3.4110000e-02
   5.7080000e-02
   2.6510000e-02
  -4.1700000e-03
  -1.5110000e-02
  -6.3580000e-02
   1.3790000e-02
  -1.6070000e-02
   1.9690000e-02
  -2.2810000e-02
  -4.9460000e-02
   3.2680000e-02
  -4.9410000e-02
   3.9210000e-02
   1.4920000e-02
  -5.9850000e-02
   3.8390000e-02
  -5.1820000e-02
  -2.4210000e-02
   6.7560000e-02
  -1.9140000e-02
   2.1630000e-02
   4.4010000e-02
  -1.7080000e-02
   4.3100000e-02
   2.0480000e-02
  -5.1520000e-02
  -2.1500000e-02
  -1.5900000e-03
  -2.1330000e-02
  -7.9200000e-03
  -2.6620000e-02
  -5.5250000e-02
  -2.1400000e-03
   2.7090000e-02
   5.5250000e-02
   2.2260000e-02
   1.1160000e-02
  -2.8980000e-02
   1.0230000e-02
   1.3790000e-02
  -3.3830000e-02
   4.9100000e-03
  -5.3520000e-02
  -2.8620000e-02
  -1.6970000e-02
  -6.0050000e-02
  -3.0980000e-02
  -4.7760000e-02
  -2.1250000e-02
  -4.9430000e-02
   1.8370000e-02
  -2.5470000e-02
  -8.6100000e-03
   5.0150000e-02
   1.8510000e-02
   5.5660000e-02
   5.2970000e-02
  -1.5570000e-02
  -8.9900000e-03
   1.1820000e-02
  -2.3940000e-02
  -2.8000000e-03
  -1.3130000e-02
  -7.6390000e-02
  -1.4420000e-02
  -5.1240000e-02
  -1.6090000e-02
   1.6180000e-02
   1.7000000e-03
   6.6900000e-03
   2.6680000e-02
   1.1350000e-02
   1.2670000e-02
   1.9550000e-02
   8.3100000e-03
  -3.4710000e-02
   7.6500000e-03
  -1.1790000e-02
   1.3980000e-02
   1.3330000e-02
  -1.4200000e-02
  -5.0400000e-03
  -4.7980000e-02
  -2.1610000e-02
   1.9270000e-02
   2.6180000e-02
   3.1590000e-02
  -1.1460000e-02
  -4.2910000e-02
  -1.9910000e-02
   7.9620000e-02
   3.0650000e-02
   4.1700000e-03
  -6.0600000e-03
  -3.5480000e-02
   1.3520000e-02
   5.5660000e-02
   4.5500000e-03
  -3.5530000e-02
  -3.6520000e-02
  -6.3340000e-02
  -2.0590000e-02
  -2.2780000e-02
   1.6700000e-03
  -6.0130000e-02
  -4.0090000e-02
  -6.3100000e-03
  -8.1700000e-03
   7.0600000e-02
   3.1060000e-02
   8.9700000e-03
  -4.6600000e-03
  -3.7560000e-02
   3.2350000e-02
   1.2640000e-02
  -9.8700000e-03
  -3.3970000e-02
  -3.5180000e-02
  -4.4100000e-03
  -4.3570000e-02
   2.0120000e-02
  -1.9080000e-02
  -3.2980000e-02
   2.6350000e-02
  -3.2240000e-02
   1.8560000e-02
   5.1240000e-02
   9.1900000e-03
   1.2390000e-02
  -1.0400000e-03
  -2.0650000e-02
   1.6510000e-02
   1.8640000e-02
  -1.6640000e-02
  -2.4980000e-02
  -9.3800000e-03
  -5.7390000e-02
   4.0300000e-03
   2.6900000e-03
  -2.4980000e-02
   4.0220000e-02
  -3.1060000e-02
  -2.5200000e-03
  -8.7500000e-03
  -2.9640000e-02
   3.6050000e-02
   1.3050000e-02
   1.0230000e-02
  -1.1200000e-03
   3.8100000e-03
  -1.7660000e-02
   3.2350000e-02
   1.2600000e-03
  -1.3930000e-02
  -3.3400000e-02
  -4.2850000e-02
   2.9690000e-02
   6.0300000e-03
   2.5800000e-03
  -2.5280000e-02
  -4.4830000e-02
   1.9880000e-02
  -3.6330000e-02
   1.3190000e-02
  -1.5220000e-02
  -1.6670000e-02
   1.2780000e-02
   1.0690000e-02
   3.0000000e-04
   2.8200000e-03
   1.9700000e-03
  -1.8120000e-02
   3.3310000e-02
   3.8250000e-02
  -2.6810000e-02
  -3.7730000e-02
   3.8100000e-03
  -3.4710000e-02
   1.7680000e-02
  -1.3930000e-02
  -6.2020000e-02
  -1.9600000e-02
  -2.6300000e-03
  -2.0840000e-02
   2.5280000e-02
   1.0970000e-02
  -3.4110000e-02
   5.2310000e-02
   9.7900000e-03
   9.2400000e-03
   4.3130000e-02
  -6.6490000e-02
   1.3220000e-02
   5.2810000e-02
  -1.5460000e-02
   2.1470000e-02
  -1.5600000e-02
  -7.7180000e-02
  -4.6100000e-03
  -4.0090000e-02
  -3.4550000e-02
   2.0810000e-02
  -6.7400000e-03
   1.8400000e-02
  -1.1320000e-02
  -4.5490000e-02
   3.5900000e-03
   1.1760000e-02
   1.1800000e-03
   3.1810000e-02
  -2.8760000e-02
  -2.0650000e-02
  -9.4300000e-03
   3.5100000e-03
   3.8060000e-02
   1.6070000e-02
   2.2200000e-03
  -3.3340000e-02
  -5.4860000e-02
  -4.4100000e-03
  -2.9470000e-02
  -2.1740000e-02
   6.3100000e-03
  -3.1860000e-02
  -4.0090000e-02
   1.3000000e-02
  -6.6000000e-04
   3.3830000e-02
   4.8940000e-02
   1.9850000e-02
   1.3790000e-02
  -1.0120000e-02
  -2.2650000e-02
   1.6400000e-02
   1.7680000e-02
  -5.2100000e-03
  -4.0880000e-02
  -2.9530000e-02
  -2.0290000e-02
   2.1060000e-02
   3.2220000e-02
  -4.3290000e-02
  -2.9860000e-02
  -2.0760000e-02
  -1.1730000e-02
   2.1300000e-02
   2.5360000e-02
   1.8900000e-03
  -2.5170000e-02
   3.6990000e-02
  -2.3960000e-02
  -7.2900000e-03
   3.1780000e-02
  -4.4280000e-02
   1.0400000e-03
  -5.5410000e-02
  -5.2970000e-02
  -3.0270000e-02
  -1.5980000e-02
  -1.1000000e-03
  -1.2970000e-02
  -3.2960000e-02
  -1.9490000e-02
   2.7420000e-02
   5.6950000e-02
   5.2340000e-02
   5.1130000e-02
  -1.7000000e-02
   1.4340000e-02
  -1.4640000e-02
  -6.2800000e-03
   9.2700000e-03
  -5.9090000e-02
  -3.1480000e-02
  -4.0090000e-02
  -6.2800000e-03
  -4.1700000e-03
  -1.0750000e-02
   6.4700000e-03
  -4.5100000e-02
   9.4300000e-03
   1.3570000e-02
   3.4300000e-02
   5.4860000e-02
   1.5000000e-02
  -1.0940000e-02
  -9.3800000e-03
  -2.7940000e-02
  -6.2800000e-03
   1.5350000e-02
  -2.0450000e-02
  -4.8200000e-02
  -4.5270000e-02
  -2.3330000e-02
  -2.6460000e-02
   2.8900000e-02
   5.1190000e-02
   1.0140000e-02
   2.4350000e-02
   1.7380000e-02
  -4.2660000e-02
   4.6280000e-02
   1.4310000e-02
   1.5160000e-02
   2.4210000e-02
  -3.8390000e-02
   5.6500000e-03
  -1.3350000e-02
  -5.7080000e-02
   1.9930000e-02
  -7.2250000e-02
  -7.1700000e-02
  -2.7030000e-02
  -7.7350000e-02
   1.9990000e-02
   4.2250000e-02
   1.0720000e-02
  -2.5990000e-02
  -3.5230000e-02
  -2.0340000e-02
   1.9550000e-02
   3.2330000e-02
   1.0170000e-02
  -2.1880000e-02
  -4.6120000e-02
  -1.9220000e-02
   1.4340000e-02
   1.8340000e-02
  -3.8030000e-02
  -1.8260000e-02
  -5.5360000e-02
  -3.2900000e-03
   3.1860000e-02
   2.1400000e-03
   3.9590000e-02
  -5.0200000e-03
   3.9800000e-03
   3.8220000e-02
   1.6090000e-02
   3.1230000e-02
  -2.7060000e-02
  -1.5570000e-02
  -2.6160000e-02
  -1.6700000e-03
  -5.5900000e-03
  -3.4000000e-02
  -6.3000000e-04
  -5.2890000e-02
   1.4280000e-02
  -4.9600000e-03
   3.0400000e-03
  -2.1100000e-03
  -3.7150000e-02
   2.6840000e-02
  -4.3000000e-03
   3.9980000e-02
   2.9300000e-03
  -3.4790000e-02
   2.6900000e-03
  -3.5600000e-03
  -8.8800000e-03
   1.1950000e-02
  -4.8940000e-02
  -2.3440000e-02
  -9.5100000e-03
   7.3800000e-03
  -5.4300000e-03
  -2.4350000e-02
  -4.4280000e-02
  -4.5380000e-02
  -1.2120000e-02
   4.5620000e-02
   4.2310000e-02
   3.9020000e-02
   4.9300000e-02
   2.3900000e-03
   5.5900000e-03
   1.3160000e-02
  -8.1200000e-03
   2.6380000e-02
  -5.1490000e-02
  -5.3790000e-02
  -3.2460000e-02
  -8.3730000e-02
   3.0680000e-02
  -9.6500000e-03
  -4.2960000e-02
  -9.6000000e-04
  -1.7800000e-03
  -1.8510000e-02
   7.0330000e-02
   3.1280000e-02
  -2.0300000e-03
   5.7250000e-02
  -1.5160000e-02
  -2.3280000e-02
  -2.5280000e-02
  -1.1600000e-02
  -5.5880000e-02
  -1.6700000e-02
  -5.4010000e-02
  -2.7140000e-02
  -8.7700000e-03
   1.2670000e-02
   1.6620000e-02
   1.2780000e-02
   5.8130000e-02
   7.9800000e-03
   1.0040000e-02
   1.7500000e-03
   4.9600000e-03
   3.0850000e-02
  -5.3500000e-03
  -6.9100000e-03
  -2.1660000e-02
  -3.0680000e-02
   1.7470000e-02
  -5.7110000e-02
  -3.2410000e-02
  -5.5400000e-03
  -2.4540000e-02
  -1.3600000e-02
   1.0910000e-02
   2.4920000e-02
  -1.8920000e-02
   8.0600000e-03
  -1.8180000e-02
  -5.9360000e-02
   2.6760000e-02
   2.2920000e-02
  -5.2530000e-02
   3.5890000e-02
  -2.5530000e-02
  -3.9700000e-02
   5.4620000e-02
  -7.5890000e-02
  -2.3880000e-02
  -1.3380000e-02
  -6.1170000e-02
   6.6110000e-02
   1.5190000e-02
   1.7550000e-02
   2.7530000e-02
   1.8420000e-02
   1.5080000e-02
   3.0680000e-02
  -8.6100000e-03
  -2.0230000e-02
  -4.7200000e-03
  -1.2370000e-02
  -4.9100000e-03
   1.8100000e-02
   3.5100000e-02
   6.0600000e-03
   8.3400000e-03
   2.7000000e-04
  -5.9720000e-02
   1.2690000e-02
  -2.6320000e-02
  -3.8740000e-02
   2.6920000e-02
  -4.0880000e-02
  -4.0520000e-02
   3.5600000e-03
  -1.1160000e-02
  -1.3330000e-02
   5.6920000e-02
  -7.2160000e-02
  -2.5470000e-02
   2.1300000e-02
  -7.4000000e-04
   7.3120000e-02
   8.1400000e-03
  -1.8920000e-02
  -3.6700000e-03
  -2.2570000e-02
   4.4000000e-04
  -1.1350000e-02
  -7.4390000e-02
  -1.5630000e-02
   1.4000000e-04
   1.8480000e-02
   4.5600000e-02
  -1.3240000e-02
  -3.2710000e-02
  -2.2730000e-02
   2.9300000e-03
   1.5160000e-02
   5.9500000e-03
  -2.6490000e-02
  -3.0300000e-02
  -3.5920000e-02
   2.6680000e-02
   3.0570000e-02
  -1.0310000e-02
  -1.6810000e-02
  -4.3070000e-02
  -4.9930000e-02
   9.1300000e-03
   1.0670000e-02
   8.5000000e-03
   3.7430000e-02
   0.0000000e+00
   4.2060000e-02
   3.7920000e-02
  -3.8140000e-02
   5.5710000e-02
  -2.6900000e-03
  -2.9910000e-02
  -1.1710000e-02
  -6.5910000e-02
  -2.5360000e-02
   6.3560000e-02
   7.1300000e-03
  -4.7460000e-02
  -2.1330000e-02
  -1.8010000e-02
  -1.3050000e-02
   3.5700000e-02
  -2.1030000e-02
  -8.2800000e-03
   4.6500000e-02
  -3.3420000e-02
   6.5500000e-03
  -1.7500000e-03
  -3.9350000e-02
   5.0180000e-02
  -5.6020000e-02
  -3.0820000e-02
   4.3000000e-03
   1.9500000e-03
   1.8400000e-02
  -1.4700000e-02
   1.2900000e-03
  -2.7910000e-02
   1.2370000e-02
   1.8120000e-02
  -5.1410000e-02
  -1.2940000e-02
  -3.1300000e-03
  -2.7250000e-02
   3.0110000e-02
   5.7600000e-03
  -9.1600000e-03
   2.1580000e-02
  -4.6340000e-02
  -1.1710000e-02
  -1.3080000e-02
   1.4920000e-02
   5.0920000e-02
  -3.2410000e-02
  -6.0700000e-02
  -3.7730000e-02
  -3.7700000e-02
   4.2090000e-02
   4.3600000e-03
  -6.0320000e-02
   5.8000000e-04
   1.7300000e-03
   4.8310000e-02
   7.0080000e-02
  -4.7400000e-03
   5.7610000e-02
   4.0330000e-02
  -1.5190000e-02
   1.2230000e-02
  -8.4640000e-02
  -5.1160000e-02
  -2.9780000e-02
  -7.0410000e-02
  -7.1000000e-04
  -5.6500000e-03
  -2.6900000e-03
  -5.0200000e-03
   3.2600000e-03
  -3.4190000e-02
   4.3350000e-02
   3.8140000e-02
   2.4400000e-03
   2.5010000e-02
  -4.4100000e-03
  -4.4750000e-02
   1.3430000e-02
  -3.0680000e-02
  -1.0470000e-02
   6.5500000e-03
  -7.9570000e-02
  -4.2940000e-02
  -6.7700000e-02
  -1.0780000e-02
   8.1790000e-02
   1.1160000e-02
   5.0940000e-02
   1.0670000e-02
  -3.8500000e-02
   7.0350000e-02
   3.0460000e-02
   3.5450000e-02
   3.7650000e-02
  -5.4340000e-02
  -1.1100000e-02
   2.8200000e-03
  -3.3860000e-02
   1.9740000e-02
  -2.3170000e-02
  -5.1050000e-02
  -4.6830000e-02
  -1.7360000e-02
  -1.6640000e-02
   3.5510000e-02
   6.2650000e-02
  -1.8840000e-02
  -1.3850000e-02
  -1.7030000e-02
   1.7880000e-02
   1.3490000e-02
   9.1000000e-03
  -4.9130000e-02
  -6.5830000e-02
  -3.5070000e-02
   9.5100000e-03
   1.7470000e-02
   4.9600000e-03
  -1.3900000e-02
  -5.8400000e-02
  -1.1540000e-02
  -2.5530000e-02
   8.6900000e-03
   4.4470000e-02
  -2.7690000e-02
   6.5640000e-02
   1.6640000e-02
   5.9800000e-03
   1.8620000e-02
  -4.8720000e-02
  -4.6640000e-02
  -2.0040000e-02
   1.4780000e-02
  -1.0420000e-02
   3.3200000e-03
  -2.6400000e-02
  -6.8930000e-02
   4.2200000e-03
  -3.4050000e-02
   2.1740000e-02
   4.1790000e-02
  -1.2340000e-02
   3.9100000e-02
  -6.1400000e-03
  -1.5900000e-03
   5.6290000e-02
   4.6300000e-03
   3.9070000e-02
  -7.5900000e-03
  -7.7510000e-02
  -2.9260000e-02
  -2.3500000e-02
  -1.5100000e-03
   1.2010000e-02
  -2.9780000e-02
  -1.3020000e-02
   6.1400000e-03
   1.7190000e-02
   3.7400000e-02
  -3.5970000e-02
   1.4390000e-02
  -1.4860000e-02
   2.3360000e-02
   8.8290000e-02
  -1.3570000e-02
   3.5950000e-02
  -8.0100000e-03
  -2.7690000e-02
  -1.7000000e-02
  -2.8410000e-02
  -3.6580000e-02
  -4.5430000e-02
  -3.1970000e-02
  -1.7960000e-02
  -3.3610000e-02
   1.3760000e-02
   5.8100000e-03
  -4.4640000e-02
   1.0340000e-02
  -5.5330000e-02
  -1.8840000e-02
   6.9090000e-02
   1.6780000e-02
   2.6070000e-02
  -7.9500000e-03
  -5.1820000e-02
   1.3130000e-02
  -5.6800000e-03
  -1.6940000e-02
  -5.5220000e-02
  -8.3300000e-02
  -5.1790000e-02
   2.4370000e-02
  -5.7300000e-03
   3.7100000e-02
  -2.1110000e-02
  -1.8100000e-02
   3.1610000e-02
   1.1900000e-02
   3.8820000e-02
  -1.5160000e-02
   1.0500000e-02
   2.5770000e-02
  -4.4140000e-02
   6.4600000e-02
  -2.5880000e-02
  -5.4010000e-02
   2.6240000e-02
  -5.4890000e-02
   8.4200000e-03
   2.5770000e-02
  -1.3820000e-02
   3.3450000e-02
   1.2390000e-02
  -1.7190000e-02
   1.3870000e-02
  -7.8700000e-03
  -3.5010000e-02
  -2.4790000e-02
  -5.0610000e-02
  -3.6580000e-02
   3.6960000e-02
   3.0490000e-02
  -1.9600000e-02
   2.2590000e-02
  -4.5270000e-02
  -2.7750000e-02
   1.2670000e-02
  -4.6900000e-03
   1.0010000e-02
  -1.5630000e-02
  -3.2820000e-02
   3.7730000e-02
   1.9770000e-02
   1.9490000e-02
   2.0800000e-03
  -2.3470000e-02
   3.2600000e-03
  -7.6500000e-03
  -1.3200000e-03
  -6.0540000e-02
   9.7600000e-03
   1.3240000e-02
   1.5410000e-02
   3.7370000e-02
  -5.5520000e-02
  -1.6010000e-02
  -3.9200000e-03
   1.0090000e-02
   9.8700000e-03
  -1.3430000e-02
   2.4650000e-02
  -5.5600000e-02
   5.2730000e-02
  -1.0830000e-02
  -2.4050000e-02
   2.5390000e-02
  -1.0660000e-01
   4.0900000e-03
  -3.8660000e-02
   3.9810000e-02
   3.0300000e-02
  -3.4770000e-02
   2.3500000e-02
  -1.6500000e-03
   3.6300000e-02
  -4.3600000e-03
  -3.2240000e-02
   2.4180000e-02
  -5.3300000e-02
   5.2100000e-03
   4.8000000e-03
  -5.8290000e-02
   6.8500000e-03
   1.3400000e-03
  -7.1810000e-02
   9.3200000e-03
  -7.7000000e-03
   2.2800000e-03
   2.4590000e-02
  -2.3520000e-02
   1.9850000e-02
  -4.9000000e-04
   1.3850000e-02
  -2.0120000e-02
  -6.5010000e-02
  -5.3300000e-02
  -2.4730000e-02
  -3.1810000e-02
   2.4400000e-02
  -3.7600000e-03
  -5.5100000e-03
   2.3000000e-03
  -3.6330000e-02
   4.1870000e-02
   3.0020000e-02
   2.1400000e-03
   8.9700000e-03
  -5.6510000e-02
   1.7550000e-02
   3.2440000e-02
   7.8400000e-03
   6.0460000e-02
  -5.9850000e-02
  -4.7080000e-02
   1.3490000e-02
  -4.4280000e-02
   5.9220000e-02
  -6.1100000e-03
   4.5200000e-03
  -1.6340000e-02
   2.3740000e-02
   4.9930000e-02
   2.1080000e-02
   3.4160000e-02
  -6.1700000e-03
  -1.0670000e-02
  -4.9400000e-03
   2.7860000e-02
  -3.6710000e-02
  -3.6800000e-02
  -3.7320000e-02
  -6.1830000e-02
  -3.4490000e-02
  -5.1440000e-02
  -5.1660000e-02
  -3.6660000e-02
   1.3650000e-02
   3.1720000e-02
   2.5960000e-02
   1.5980000e-02
   3.3040000e-02
  -6.2800000e-03
   4.6900000e-03
   2.8800000e-03
  -1.8670000e-02
   9.9000000e-04
  -4.7130000e-02
  -3.4790000e-02
  -6.1550000e-02
  -1.2690000e-02
  -1.4830000e-02
  -3.2900000e-02
  -3.6110000e-02
  -4.8690000e-02
   2.5660000e-02
   2.6490000e-02
   1.4970000e-02
   2.6430000e-02
   1.0360000e-02
   8.3600000e-03
   5.8210000e-02
   9.1300000e-03
   2.4400000e-02
  -1.5740000e-02
  -6.4540000e-02
   1.6530000e-02
  -5.8700000e-03
   4.4000000e-04
   1.9550000e-02
  -8.0090000e-02
  -2.1440000e-02
  -5.7300000e-03
  -3.6080000e-02
   4.1570000e-02
  -1.2560000e-02
   1.7110000e-02
   4.3590000e-02
   2.2020000e-02
   2.3360000e-02
  -8.6600000e-03
   2.9830000e-02
  -2.5580000e-02
   5.3500000e-03
  -6.1700000e-03
  -8.7460000e-02
   2.0970000e-02
  -4.4440000e-02
  -5.1330000e-02
   4.0580000e-02
  -5.6120000e-02
   2.6900000e-03
   2.9420000e-02
  -6.4700000e-03
   3.5310000e-02
   4.6860000e-02
   1.2560000e-02
   1.6860000e-02
   3.7600000e-03
  -4.0500000e-02
   1.0700000e-03
  -2.6160000e-02
  -3.2050000e-02
  -2.6290000e-02
  -5.9060000e-02
  -5.2370000e-02
   1.2120000e-02
   1.3400000e-03
   3.7210000e-02
   3.0820000e-02
  -2.6100000e-02
   1.1710000e-02
   5.8100000e-02
   4.6170000e-02
  -4.4000000e-04
   2.1700000e-03
  -6.0270000e-02
  -3.4550000e-02
   3.0000000e-02
  -8.6200000e-02
   2.4590000e-02
  -5.3110000e-02
  -3.6690000e-02
   5.3360000e-02
  -5.4210000e-02
   1.9850000e-02
  -1.0060000e-02
  -4.0900000e-03
   5.8590000e-02
   4.8300000e-03
   1.5520000e-02
  -2.7200000e-02
  -1.4500000e-03
  -1.7500000e-03
   4.1320000e-02
   8.3400000e-03
  -3.3560000e-02
   9.5400000e-03
  -3.6660000e-02
   2.2320000e-02
  -4.5000000e-03
  -4.3840000e-02
  -6.7260000e-02
  -1.1760000e-02
  -1.3850000e-02
  -1.5410000e-02
  -7.1800000e-03
  -3.5180000e-02
   2.7030000e-02
  -9.0800000e-03
   1.7820000e-02
  -1.2340000e-02
  -4.7240000e-02
   2.6680000e-02
  -3.8170000e-02
  -2.0970000e-02
   2.5640000e-02
  -8.2560000e-02
   1.2340000e-02
   6.7200000e-03
  -3.6660000e-02
   3.0630000e-02
  -5.8480000e-02
  -7.9200000e-03
   6.2650000e-02
   3.2660000e-02
   5.4510000e-02
   3.9350000e-02
   1.8670000e-02
   4.0360000e-02
   3.7810000e-02
   9.2700000e-03
  -1.0860000e-02
  -2.8800000e-03
  -4.4800000e-02
  -6.9290000e-02
  -1.3430000e-02
  -1.5550000e-02
   1.0400000e-03
   1.0040000e-02
  -5.8240000e-02
   1.1050000e-02
  -8.3400000e-03
   2.7230000e-02
   3.7370000e-02
  -1.8180000e-02
   2.6810000e-02
  -1.1870000e-02
   1.5410000e-02
   2.3630000e-02
   1.0560000e-02
  -1.0010000e-02
  -8.5020000e-02
  -4.0330000e-02
  -2.8240000e-02
  -2.6380000e-02
   4.0580000e-02
  -4.9240000e-02
  -2.7880000e-02
  -1.8750000e-02
  -2.8210000e-02
   5.8260000e-02
  -5.4600000e-03
  -8.6400000e-03
  -1.7740000e-02
   1.1190000e-02
   4.4860000e-02
   3.8960000e-02
  -8.7700000e-03
  -3.8000000e-02
  -4.2880000e-02
   1.4280000e-02
  -3.3700000e-03
   1.1500000e-03
  -5.9990000e-02
  -8.7110000e-02
  -9.3800000e-03
  -1.5900000e-02
   2.2670000e-02
  -2.8730000e-02
  -4.5790000e-02
  -1.1190000e-02
   8.3900000e-03
   6.5670000e-02
   3.2020000e-02
   2.0700000e-02
  -2.6160000e-02
  -2.4400000e-03
   1.4500000e-02
   2.7560000e-02
   2.9890000e-02
  -8.4400000e-03
  -3.3090000e-02
  -4.8940000e-02
  -4.5000000e-03
   6.1400000e-03
  -1.4180000e-02
  -4.1400000e-03
   3.2600000e-03
   3.5600000e-03
   5.1490000e-02
  -1.0890000e-02
  -3.2960000e-02
   3.7540000e-02
  -1.5770000e-02
   5.6540000e-02
  -1.1200000e-03
  -2.3420000e-02
   7.6500000e-03
  -6.7390000e-02
   4.5190000e-02
  -2.7530000e-02
  -6.1100000e-03
  -1.6070000e-02
  -8.6530000e-02
  -2.0560000e-02
  -4.4030000e-02
   4.0600000e-03
   2.6840000e-02
  -2.4050000e-02
   1.8180000e-02
   4.8720000e-02
  -1.0800000e-02
   2.9280000e-02
   5.0000000e-05
  -4.0850000e-02
   1.6510000e-02
  -3.0600000e-02
  -1.1730000e-02
   1.1200000e-03
  -6.3600000e-03
  -1.9410000e-02
  -1.0670000e-02
  -2.1080000e-02
   5.9200000e-03
   4.5680000e-02
  -9.0800000e-03
  -2.2000000e-04
   1.6370000e-02
  -1.0340000e-02
   5.2830000e-02
   6.3690000e-02
  -1.0340000e-02
   2.2200000e-03
  -3.9560000e-02
  -5.3520000e-02
   1.0100000e-03
   1.0700000e-03
  -1.5740000e-02
  -3.5420000e-02
  -4.8060000e-02
  -2.2320000e-02
  -1.6700000e-03
   6.0900000e-03
  -5.7900000e-03
  -1.2500000e-02
  -4.0940000e-02
   1.8100000e-03
   7.5700000e-03
  -2.0340000e-02
   2.7560000e-02
   1.3200000e-03
   2.7690000e-02
   3.4440000e-02
  -5.9000000e-02
  -5.3900000e-02
  -5.4370000e-02
  -1.7630000e-02
   5.0640000e-02
  -4.8640000e-02
  -1.1190000e-02
  -4.5400000e-02
  -2.4430000e-02
   7.8550000e-02
  -1.1630000e-02
   2.5280000e-02
  -9.0200000e-03
  -3.5340000e-02
   3.4490000e-02
  -5.7900000e-03
   5.8150000e-02
   2.9500000e-02
  -1.8320000e-02
  -2.7030000e-02
  -3.6600000e-02
  -5.0780000e-02
   2.7400000e-03
   8.4700000e-03
  -1.3220000e-02
   2.1660000e-02
  -1.6420000e-02
   3.0760000e-02
   2.4270000e-02
   4.3650000e-02
   3.2440000e-02
   2.5800000e-03
  -1.2900000e-03
  -1.0140000e-02
  -7.6500000e-03
   1.7270000e-02
  -9.2900000e-03
   2.3300000e-03
  -9.4300000e-03
  -3.5750000e-02
  -1.8070000e-02
  -2.5420000e-02
   5.7000000e-03
  -1.3870000e-02
  -1.6420000e-02
   8.5000000e-03
   2.3170000e-02
   2.9580000e-02
   1.8780000e-02
  -5.0150000e-02
  -2.3740000e-02
  -3.1040000e-02
   2.1960000e-02
  -3.3000000e-04
  -2.9640000e-02
  -8.7500000e-03
  -7.9980000e-02
  -3.5620000e-02
   2.1930000e-02
  -2.2870000e-02
   1.4970000e-02
  -7.2930000e-02
  -6.5390000e-02
   2.6350000e-02
  -2.8460000e-02
   7.5450000e-02
  -4.4400000e-03
  -2.7500000e-02
   4.5710000e-02
  -2.2700000e-02
   1.5550000e-02
  -3.6410000e-02
  -4.1430000e-02
  -1.5550000e-02
  -2.3310000e-02
  -3.2100000e-03
  -3.4570000e-02
  -4.5950000e-02
   3.0570000e-02
  -2.3060000e-02
   6.5940000e-02
   1.7410000e-02
   3.4460000e-02
   3.9450000e-02
   2.5530000e-02
   2.1060000e-02
  -1.8750000e-02
   2.9120000e-02
  -4.6420000e-02
   7.5700000e-03
  -3.3450000e-02
  -5.6560000e-02
   3.0740000e-02
  -5.8180000e-02
   2.7910000e-02
   3.1370000e-02
  -2.2400000e-02
   4.5290000e-02
  -5.9280000e-02
   2.1280000e-02
   3.0710000e-02
  -1.8600000e-03
   2.4980000e-02
  -6.0480000e-02
  -4.1510000e-02
  -3.5260000e-02
   2.5640000e-02
  -1.5130000e-02
  -3.6160000e-02
  -7.2700000e-03
  -4.0470000e-02
   3.2900000e-03
   1.0970000e-02
  -4.1900000e-03
   2.7100000e-03
   4.9190000e-02
   2.2510000e-02
  -2.2980000e-02
  -5.0420000e-02
  -5.0610000e-02
  -4.3840000e-02
   3.3810000e-02
   3.3610000e-02
  -5.2070000e-02
   4.2470000e-02
  -3.1230000e-02
  -6.5500000e-03
   8.5820000e-02
  -5.5490000e-02
   2.5440000e-02
  -3.2760000e-02
  -4.7930000e-02
   1.6290000e-02
  -2.5660000e-02
   1.4750000e-02
   3.5600000e-03
  -9.4600000e-03
  -1.9820000e-02
  -1.6590000e-02
   1.7960000e-02
   1.5740000e-02
   1.0610000e-02
   1.8700000e-02
  -4.1400000e-02
   9.9000000e-04
   2.0800000e-03
  -5.4970000e-02
   1.5000000e-02
  -4.4090000e-02
  -4.8720000e-02
  -8.3100000e-03
  -2.1030000e-02
  -1.3410000e-02
   2.5720000e-02
   1.7520000e-02
   2.0920000e-02
  -1.2100000e-03
   1.8640000e-02
  -2.9720000e-02
   2.7000000e-04
  -2.8510000e-02
  -3.8250000e-02
   3.3010000e-02
  -3.3860000e-02
   4.0300000e-03
  -1.2970000e-02
  -2.3800000e-02
  -2.4460000e-02
  -4.1350000e-02
  -4.8800000e-03
  -4.6560000e-02
   1.4280000e-02
   1.5850000e-02
   5.3500000e-03
   4.5100000e-02
  -2.1400000e-03
   2.0260000e-02
  -1.0140000e-02
  -2.4460000e-02
  -2.5500000e-03
  -9.8700000e-03
   2.5360000e-02
   3.8080000e-02
   2.7500000e-02
  -9.2700000e-03
  -1.2830000e-02
  -2.8380000e-02
   1.4750000e-02
  -1.2800000e-02
   9.5100000e-03
  -3.3750000e-02
  -2.9090000e-02
   1.2280000e-02
  -1.5130000e-02
   3.3500000e-02
   4.6910000e-02
  -1.6830000e-02
  -7.8100000e-03
  -4.0410000e-02
   9.6000000e-04
   2.1250000e-02
   1.7410000e-02
  -1.3710000e-02
  -1.2390000e-02
  -5.2100000e-03
  -2.0020000e-02
   4.8300000e-03
  -5.5000000e-02
  -6.4270000e-02
  -3.8520000e-02
   7.0200000e-03
  -2.0760000e-02
   2.6320000e-02
   1.5880000e-02
  -5.0640000e-02
   1.5490000e-02
  -3.7800000e-03
   5.2000000e-04
   2.8080000e-02
  -5.6400000e-02
   2.2890000e-02
   1.1430000e-02
  -2.4320000e-02
   4.9350000e-02
  -7.2710000e-02
  -3.0630000e-02
   2.1470000e-02
  -1.0797000e-01
   8.8800000e-03
  -2.3520000e-02
  -5.8700000e-03
   2.3580000e-02
  -3.0210000e-02
   4.0910000e-02
  -2.5170000e-02
   1.8700000e-02
  -1.4590000e-02
  -2.1100000e-03
   3.4190000e-02
   2.6710000e-02
   1.7300000e-02
   9.0200000e-03
  -2.1880000e-02
   3.0700000e-03
   1.1430000e-02
  -5.2100000e-03
  -1.0500000e-02
   3.0200000e-03
  -1.1240000e-02
   7.3800000e-03
   3.4490000e-02
  -5.1980000e-02
   1.0830000e-02
   1.7190000e-02
  -5.0590000e-02
  -4.1400000e-03
  -3.7210000e-02
  -1.8400000e-02
   3.7150000e-02
   3.7300000e-03
   1.5300000e-02
   1.2600000e-03
   1.5600000e-03
  -1.3520000e-02
  -1.6640000e-02
  -4.6300000e-03
  -5.7610000e-02
   2.9090000e-02
   9.2100000e-03
  -1.9880000e-02
   2.8350000e-02
  -5.6730000e-02
   2.1880000e-02
   1.4260000e-02
  -3.6700000e-03
   4.9400000e-03
  -3.7100000e-02
   2.5500000e-03
  -1.0610000e-02
   5.5880000e-02
   1.6830000e-02
  -2.6600000e-03
   1.7160000e-02
  -7.2800000e-02
  -3.7010000e-02
  -2.2810000e-02
  -3.2520000e-02
   5.1300000e-02
  -1.5190000e-02
  -2.1770000e-02
   1.2300000e-03
  -4.0630000e-02
   1.0390000e-02
  -2.8080000e-02
  -2.0120000e-02
  -2.1440000e-02
  -2.0620000e-02
   2.2070000e-02
  -3.0790000e-02
   1.3190000e-02
   2.8980000e-02
   2.7400000e-03
  -2.1030000e-02
   7.1000000e-03
  -2.8900000e-02
  -7.4600000e-03
   4.3130000e-02
  -1.5100000e-03
   4.3900000e-03
   3.9320000e-02
  -1.1320000e-02
  -5.3700000e-03
   3.4520000e-02
  -4.8040000e-02
   2.2400000e-02
  -5.1270000e-02
  -8.2910000e-02
   6.1700000e-03
  -4.9570000e-02
   6.4950000e-02
   4.0800000e-02
  -4.9760000e-02
   6.0300000e-03
   4.8300000e-03
   1.7000000e-03
   5.8540000e-02
   1.1000000e-03
  -2.7990000e-02
  -6.5300000e-03
  -1.6810000e-02
   1.1980000e-02
   2.9340000e-02
  -2.3720000e-02
  -3.6520000e-02
  -4.7380000e-02
  -2.7060000e-02
  -2.1330000e-02
   3.8440000e-02
   3.2740000e-02
   9.8200000e-03
   6.9100000e-03
  -5.4120000e-02
   1.7990000e-02
   2.4100000e-03
   2.3660000e-02
   3.5600000e-03
   3.1000000e-03
  -1.5770000e-02
   3.8410000e-02
   2.6290000e-02
  -2.4100000e-03
  -6.6400000e-03
  -1.5130000e-02
  -3.0740000e-02
  -4.7630000e-02
   2.9900000e-03
  -9.7120000e-02
   2.4680000e-02
  -3.5400000e-03
  -6.0950000e-02
   7.8580000e-02
  -7.1970000e-02
   1.1950000e-02
   2.6460000e-02
  -5.7520000e-02
   4.7080000e-02
  -4.0600000e-03
  -3.1700000e-02
   2.8000000e-03
  -3.6850000e-02
   9.6000000e-04
   2.7400000e-03
  -3.4900000e-02
  -1.7300000e-02
  -3.0600000e-02
  -6.3600000e-03
  -4.6300000e-03
   2.3390000e-02
   2.3090000e-02
  -2.2870000e-02
   2.5090000e-02
  -3.9200000e-03
  -3.1390000e-02
   5.1930000e-02
   1.7250000e-02
   2.2070000e-02
   2.6400000e-02
  -5.6730000e-02
  -2.2480000e-02
  -2.7200000e-02
   7.5100000e-03
   2.7060000e-02
  -3.3010000e-02
  -4.6420000e-02
  -1.4340000e-02
  -2.4790000e-02
   5.5270000e-02
   5.0970000e-02
  -2.4680000e-02
  -3.4300000e-03
  -1.4340000e-02
  -4.0300000e-03
   6.5780000e-02
   1.2390000e-02
  -3.1500000e-03
   1.9470000e-02
  -3.1040000e-02
  -2.5770000e-02
  -7.3200000e-03
  -3.6930000e-02
   9.6500000e-03
  -7.9200000e-03
  -4.2170000e-02
   2.7700000e-03
  -2.0560000e-02
   3.6660000e-02
   4.2140000e-02
  -3.1200000e-02
   9.5400000e-03
   6.3000000e-04
   1.5240000e-02
   2.7230000e-02
  -1.3460000e-02
   5.6200000e-03
  -3.5230000e-02
  -4.9600000e-03
  -1.1680000e-02
  -3.5730000e-02
   9.9800000e-03
  -2.5770000e-02
  -3.6800000e-02
  -2.2130000e-02
   5.0400000e-03
   3.4350000e-02
   3.6630000e-02
   5.7900000e-03
  -5.9990000e-02
  -3.0850000e-02
  -2.8270000e-02
   1.7630000e-02
   2.4130000e-02
  -3.3340000e-02
  -2.2670000e-02
   7.7600000e-03
  -3.8700000e-03
   2.8950000e-02
  -1.6200000e-02
  -4.8170000e-02
  -4.5270000e-02
   7.4000000e-04
  -9.8700000e-03
  -1.9110000e-02
   4.8610000e-02
  -3.7840000e-02
   3.8080000e-02
   8.0500000e-02
  -1.5600000e-02
   5.0890000e-02
  -4.2720000e-02
  -9.5520000e-02
   1.3240000e-02
  -2.3170000e-02
   2.7530000e-02
   1.7410000e-02
  -6.8130000e-02
  -1.7330000e-02
   9.9500000e-03
  -8.4700000e-03
   3.8360000e-02
  -2.1500000e-02
  -2.6400000e-02
  -2.2000000e-04
   1.0140000e-02
   1.3650000e-02
   4.0900000e-03
   5.4300000e-03
  -5.5660000e-02
   1.4180000e-02
   8.0000000e-05
  -3.9370000e-02
  -4.1700000e-03
  -2.5910000e-02
  -7.4000000e-03
   2.7800000e-02
   6.5170000e-02
  -2.5120000e-02
   3.5970000e-02
   5.7000000e-03
  -8.2470000e-02
   8.0090000e-02
   2.2800000e-03
   2.0780000e-02
   2.4400000e-03
  -8.5190000e-02
  -2.8200000e-03
   1.0280000e-02
   4.8500000e-02
  -8.7200000e-03
  -7.0460000e-02
  -3.7620000e-02
  -5.1490000e-02
   6.7310000e-02
   2.1000000e-02
  -7.7600000e-03
  -2.0920000e-02
  -4.1700000e-02
   2.3140000e-02
   3.5590000e-02
  -8.1200000e-03
   2.2350000e-02
  -2.2240000e-02
  -3.2240000e-02
   2.3550000e-02
  -1.1000000e-03
   1.5900000e-02
  -2.6240000e-02
  -4.8500000e-02
  -7.0660000e-02
  -5.0830000e-02
   2.1410000e-02
  -3.7800000e-03
   3.8700000e-03
   1.5710000e-02
  -7.7920000e-02
   1.0340000e-02
   5.6920000e-02
  -6.3900000e-03
   5.5360000e-02
  -2.4270000e-02
  -4.9960000e-02
  -3.2400000e-03
   2.4950000e-02
  -1.4750000e-02
   5.1300000e-03
  -1.3380000e-02
  -5.8020000e-02
  -1.0400000e-03
   6.2200000e-03
  -4.1650000e-02
   3.9290000e-02
   1.4200000e-02
  -5.0940000e-02
   4.9160000e-02
  -3.2930000e-02
   9.5400000e-03
   1.6780000e-02
  -3.9540000e-02
   1.3700000e-03
  -1.1650000e-02
   4.5840000e-02
  -4.3650000e-02
   1.3110000e-02
   1.9630000e-02
  -4.1840000e-02
   7.7650000e-02
  -7.5760000e-02
  -4.4310000e-02
   4.3510000e-02
  -6.8600000e-02
   8.2010000e-02
   3.1040000e-02
  -3.7430000e-02
   4.0170000e-02
  -1.7410000e-02
   2.1080000e-02
   6.4200000e-03
   5.1000000e-03
  -4.0520000e-02
  -2.2320000e-02
   1.6290000e-02
  -8.4860000e-02
  -1.0400000e-03
   1.2530000e-02
  -4.4990000e-02
   6.1010000e-02
  -3.8880000e-02
   2.3610000e-02
   2.9280000e-02
  -4.2310000e-02
   5.4180000e-02
  -2.5860000e-02
  -8.6900000e-03
   1.4200000e-02
  -2.2870000e-02
   6.0600000e-03
  -4.9160000e-02
  -3.0520000e-02
  -2.8840000e-02
  -3.9400000e-02
   8.1540000e-02
  -1.3490000e-02
  -2.2020000e-02
   2.6180000e-02
  -1.8700000e-02
   2.2620000e-02
  -1.1650000e-02
  -5.1790000e-02
  -5.0670000e-02
  -4.6610000e-02
  -1.4560000e-02
   3.4050000e-02
  -1.7110000e-02
  -4.9380000e-02
  -5.8100000e-03
  -1.3380000e-02
   3.6160000e-02
   3.7950000e-02
   1.2640000e-02
  -4.3020000e-02
   5.8100000e-03
   2.8900000e-02
  -3.3700000e-03
   3.1530000e-02
   8.3100000e-03
  -6.2760000e-02
  -1.1190000e-02
  -2.3900000e-03
  -6.9860000e-02
   5.6230000e-02
  -1.8950000e-02
  -5.8900000e-03
   2.0370000e-02
  -5.5060000e-02
   5.1030000e-02
  -2.7120000e-02
   3.9290000e-02
  -4.3900000e-03
  -9.0040000e-02
   2.3910000e-02
   3.6500000e-03
   2.7470000e-02
   4.0280000e-02
  -1.7190000e-02
  -2.3690000e-02
   1.0890000e-02
   4.8910000e-02
  -7.6800000e-03
  -3.5310000e-02
  -2.7470000e-02
  -4.8830000e-02
   1.7300000e-02
   5.7610000e-02
  -1.7330000e-02
  -7.7300000e-03
  -8.7200000e-03
  -7.5100000e-03
   2.7530000e-02
  -3.3000000e-04
  -4.4700000e-03
   2.0890000e-02
  -1.8320000e-02
   5.6120000e-02
   1.2450000e-02
  -4.2960000e-02
   9.2100000e-03
  -7.1780000e-02
  -4.3380000e-02
   3.3590000e-02
  -5.5710000e-02
   4.9900000e-03
  -2.7720000e-02
  -1.8750000e-02
  -1.2010000e-02
  -1.7300000e-03
   6.4820000e-02
  -8.3600000e-03
   5.1490000e-02
  -4.6900000e-03
  -2.7390000e-02
   2.3000000e-02
   4.3600000e-03
   2.5010000e-02
   2.5280000e-02
  -8.4400000e-03
  -9.5690000e-02
  -5.8590000e-02
  -4.2250000e-02
  -1.0640000e-02
   3.3890000e-02
  -1.6890000e-02
  -1.7330000e-02
   1.1320000e-02
   1.2560000e-02
   1.2100000e-03
  -7.4000000e-04
  -3.4220000e-02
  -6.8000000e-03
   9.5700000e-03
   8.4700000e-03
   2.6900000e-02
  -1.1100000e-02
   4.3240000e-02
  -2.0040000e-02
   2.7000000e-04
  -3.1910000e-02
  -3.6850000e-02
  -2.3330000e-02
  -8.7550000e-02
  -5.8400000e-03
  -7.1000000e-04
  -1.1000000e-04
   4.8200000e-02
  -5.6200000e-03
  -2.2840000e-02
   2.1000000e-02
   4.0000000e-03
   9.2700000e-03
   3.4600000e-02
  -6.0570000e-02
   3.5100000e-03
   2.6430000e-02
   5.8000000e-04
   2.5090000e-02
  -1.6070000e-02
  -4.0090000e-02
  -1.0250000e-02
  -2.2200000e-03
   4.0000000e-03
   1.5710000e-02
  -2.5280000e-02
  -1.2420000e-02
   5.8700000e-03
   1.8340000e-02
   6.4650000e-02
  -7.0500000e-03
   4.8300000e-03
  -7.6330000e-02
  -2.1880000e-02
   6.4620000e-02
   1.1410000e-02
   5.1980000e-02
  -2.7450000e-02
  -9.5330000e-02
  -1.0580000e-02
  -3.9700000e-02
  -2.8350000e-02
  -1.7050000e-02
  -2.1500000e-02
  -3.8140000e-02
   4.7380000e-02
   4.2250000e-02
   2.2920000e-02
   5.3490000e-02
  -2.7770000e-02
  -3.1090000e-02
   8.1200000e-03
   3.8100000e-03
   4.8500000e-03
  -1.3980000e-02
  -4.8090000e-02
  -6.2500000e-03
   2.5060000e-02
  -1.0560000e-02
  -5.7000000e-03
  -4.2610000e-02
  -7.1530000e-02
  -1.9690000e-02
   3.7800000e-03
  -3.0000000e-04
   3.0430000e-02
   3.2820000e-02
  -2.4070000e-02
   2.8620000e-02
  -1.6150000e-02
  -4.2500000e-02
   2.3300000e-03
  -1.1950000e-02
  -2.7640000e-02
   2.1850000e-02
  -4.6910000e-02
  -2.1060000e-02
   2.8760000e-02
  -3.5700000e-02
   9.6500000e-03
  -4.2940000e-02
  -8.9900000e-03
   5.5400000e-03
   3.0000000e-04
   2.1580000e-02
   1.1160000e-02
   5.3740000e-02
   8.2000000e-04
  -1.2060000e-02
   1.3960000e-02
  -6.9920000e-02
  -8.1400000e-03
   3.7600000e-03
  -7.0520000e-02
   1.3710000e-02
  -1.4970000e-02
  -7.3200000e-03
   1.8860000e-02
   4.3600000e-03
  -8.9100000e-03
   2.5750000e-02
   1.0670000e-02
   9.4900000e-03
   4.6910000e-02
  -2.2730000e-02
   1.9080000e-02
  -1.9690000e-02
  -1.0580000e-02
  -2.0150000e-02
  -3.7480000e-02
  -5.9500000e-03
  -9.0370000e-02
   4.7930000e-02
  -1.2010000e-02
   2.1300000e-02
   1.2060000e-02
  -4.6390000e-02
   3.9650000e-02
   1.9330000e-02
   3.6960000e-02
   2.0840000e-02
  -3.8710000e-02
   3.6200000e-03
   2.1190000e-02
  -9.6000000e-03
   1.8640000e-02
  -7.5180000e-02
  -2.6900000e-03
  -1.5570000e-02
  -4.1760000e-02
  -8.4700000e-03
  -4.2660000e-02
  -1.3930000e-02
   3.3010000e-02
   2.0510000e-02
   2.5640000e-02
   3.1480000e-02
  -1.2060000e-02
   8.3400000e-03
  -1.5380000e-02
  -3.9210000e-02
   4.0600000e-03
  -3.1420000e-02
  -1.5790000e-02
   2.3000000e-03
  -5.1570000e-02
  -2.1000000e-02
  -3.2130000e-02
  -4.3020000e-02
  -1.3960000e-02
   6.3100000e-03
   8.9700000e-03
  -4.8800000e-03
   3.9870000e-02
  -8.2800000e-03
   2.7250000e-02
   3.0700000e-03
  -2.4840000e-02
   2.4100000e-03
  -2.7700000e-03
  -1.8590000e-02
  -1.7710000e-02
   9.3000000e-04
  -1.0360000e-02
   8.8600000e-03
  -1.0120000e-02
  -4.8610000e-02
  -2.6050000e-02
  -4.6390000e-02
   1.5270000e-02
   5.3470000e-02
  -1.4000000e-04
   1.3110000e-02
  -2.4400000e-03
  -8.7500000e-03
   5.3050000e-02
   3.4220000e-02
  -1.7000000e-03
   1.4800000e-03
  -5.4430000e-02
   2.1250000e-02
   2.6810000e-02
  -1.7300000e-02
   4.6100000e-03
  -1.2560000e-02
  -7.9200000e-03
  -1.1650000e-02
  -2.5010000e-02
  -1.4390000e-02
   5.2100000e-03
   2.8930000e-02
   3.9590000e-02
  -5.7000000e-03
  -1.5240000e-02
   2.5960000e-02
  -4.3600000e-03
   3.0000000e-05
  -1.5130000e-02
  -5.4730000e-02
  -5.0120000e-02
  -2.5530000e-02
   5.1500000e-03
  -4.9460000e-02
   4.9960000e-02
  -1.9410000e-02
  -4.6390000e-02
   4.5760000e-02
  -1.4590000e-02
   2.7140000e-02
   1.6670000e-02
  -1.5130000e-02
  -9.4600000e-03
   1.2150000e-02
   5.0000000e-05
  -1.0830000e-02
  -1.5130000e-02
  -3.8220000e-02
   9.0000000e-04
  -1.1080000e-02
  -5.2530000e-02
  -1.2830000e-02
  -2.9120000e-02
  -3.7950000e-02
   5.6620000e-02
   1.7300000e-03
  -4.8300000e-03
   5.8620000e-02
  -1.8780000e-02
  -2.6290000e-02
   8.1200000e-03
  -5.4340000e-02
   3.1640000e-02
  -6.3100000e-03
  -4.8260000e-02
  -7.7900000e-03
  -3.8630000e-02
   9.7600000e-03
   1.4780000e-02
  -1.6780000e-02
   1.3300000e-02
  -3.1720000e-02
   1.2370000e-02
  -1.2940000e-02
   7.5900000e-03
   5.9990000e-02
  -3.6200000e-03
   2.0430000e-02
  -1.5660000e-02
  -2.5770000e-02
   2.6980000e-02
  -2.0300000e-03
  -9.2900000e-03
  -5.3500000e-03
  -1.6780000e-02
  -1.2780000e-02
  -2.3960000e-02
  -1.7990000e-02
  -4.4440000e-02
   1.5190000e-02
  -1.5680000e-02
  -1.1160000e-02
  -1.8810000e-02
  -1.6780000e-02
   6.1770000e-02
   9.8200000e-03
   6.7780000e-02
  -8.4400000e-03
  -2.0870000e-02
   2.3960000e-02
  -1.0250000e-02
   4.5020000e-02
  -7.8000000e-02
   2.7530000e-02
  -4.4000000e-04
  -2.4350000e-02
   3.6710000e-02
  -7.9460000e-02
  -1.5820000e-02
   2.0430000e-02
  -4.9600000e-02
   1.4780000e-02
  -1.3460000e-02
   1.0400000e-03
   3.7260000e-02
   8.3400000e-03
  -7.9000000e-03
   2.3300000e-03
  -1.1460000e-02
  -1.6750000e-02
   8.7200000e-03
  -1.1080000e-02
  -1.4420000e-02
   8.3900000e-03
  -3.2000000e-02
  -1.9140000e-02
   7.4900000e-03
  -1.7080000e-02
  -2.4510000e-02
   1.7220000e-02
  -3.1010000e-02
  -3.5400000e-03
   2.2370000e-02
   9.1600000e-03
  -1.2280000e-02
   1.9600000e-02
  -2.5030000e-02
   2.0000000e-03
  -4.7200000e-03
  -1.7770000e-02
   6.5300000e-03
  -3.9700000e-02
   2.5580000e-02
  -2.4870000e-02
  -2.2950000e-02
   1.7740000e-02
  -4.4800000e-02
  -3.5180000e-02
  -4.8580000e-02
  -1.4560000e-02
   7.0330000e-02
  -2.4950000e-02
   4.6140000e-02
  -6.0900000e-03
  -2.2800000e-03
   8.8230000e-02
  -6.6870000e-02
   3.3010000e-02
  -1.0780000e-02
  -3.3700000e-03
   3.5920000e-02
  -7.5560000e-02
  -3.8960000e-02
  -2.2800000e-03
  -4.3730000e-02
   3.0410000e-02
  -3.4250000e-02
  -5.5490000e-02
   3.4460000e-02
   2.3990000e-02
   3.9840000e-02
   3.3500000e-02
   1.0640000e-02
  -1.1500000e-03
   1.4480000e-02
  -2.8270000e-02
  -3.7620000e-02
  -4.9600000e-03
  -1.2690000e-02
  -1.3190000e-02
  -3.2790000e-02
  -4.8090000e-02
   4.4700000e-03
   5.4180000e-02
   2.1630000e-02
   2.4400000e-03
  -3.1860000e-02
  -3.1720000e-02
   2.2760000e-02
  -7.6500000e-03
  -1.2100000e-03
   3.5860000e-02
  -2.6570000e-02
   5.0070000e-02
   3.5100000e-03
  -2.9450000e-02
   4.3050000e-02
  -6.4980000e-02
  -1.6090000e-02
  -4.1700000e-02
   1.0890000e-02
   2.4050000e-02
  -1.4720000e-02
  -4.3650000e-02
  -7.8200000e-02
   2.1410000e-02
   5.0010000e-02
   1.8180000e-02
  -5.1300000e-03
  -2.3140000e-02
  -3.1500000e-03
   3.7970000e-02
   6.8300000e-03
   4.3900000e-03
  -2.6000000e-03
  -3.6880000e-02
  -8.2300000e-03
  -5.2700000e-02
  -3.4630000e-02
   1.0830000e-02
  -2.0300000e-03
   2.6000000e-03
  -1.5930000e-02
  -5.1240000e-02
   1.2480000e-02
  -4.4230000e-02
   4.7080000e-02
   1.0120000e-02
  -3.0790000e-02
   4.2720000e-02
  -7.7100000e-02
   5.0010000e-02
   1.4480000e-02
   9.8400000e-03
   2.2780000e-02
  -6.1580000e-02
  -4.4000000e-04
  -9.4900000e-03
   1.2200000e-02
   2.7060000e-02
  -4.4090000e-02
  -1.7600000e-02
  -3.8520000e-02
  -2.0540000e-02
   1.3460000e-02
  -4.9820000e-02
   1.2900000e-03
   2.5800000e-02
   9.9000000e-04
   1.0610000e-02
  -9.2700000e-03
   4.1460000e-02
   2.1030000e-02
   2.3280000e-02
  -1.0690000e-02
  -4.5130000e-02
   1.2640000e-02
  -2.5440000e-02
  -2.3800000e-02
   5.9500000e-03
  -2.2290000e-02
   3.1890000e-02
   1.8150000e-02
  -1.9690000e-02
  -1.9250000e-02
  -4.6170000e-02
  -1.8100000e-03
   2.4650000e-02
   3.4680000e-02
  -1.6500000e-03
   3.7600000e-03
  -2.4680000e-02
   9.6500000e-03
  -2.1400000e-03
   3.1640000e-02
  -8.9400000e-03
  -4.1700000e-03
  -2.1190000e-02
  -6.3900000e-03
   2.7100000e-03
   3.1300000e-03
   6.8500000e-03
  -4.0250000e-02
  -9.9500000e-03
   1.7500000e-03
  -2.9310000e-02
  -5.5000000e-04
  -1.2060000e-02
  -4.1290000e-02
   5.4480000e-02
   1.0610000e-02
   4.5160000e-02
  -1.7190000e-02
  -5.4430000e-02
   6.9600000e-03
  -5.5710000e-02
   4.8830000e-02
  -5.0890000e-02
