# Supplementary material for: A Novel Classification Method for Flutter Signals Based on the CNN and STFT
Source: Hindawi journal article supplement (doi:10.1155/2019/9375437), 2019-04-09
Supplement: f1 [file 9375437.f1.zip › 00_25_z15.0_26channel.txt]

  -5.7500000e-02
  -1.3200000e-03
  -1.3410000e-02
  -4.4000000e-04
  -1.3600000e-02
   8.1200000e-03
   3.4740000e-02
   3.5120000e-02
   6.2380000e-02
   4.9540000e-02
   6.1220000e-02
   2.3910000e-02
  -2.5170000e-02
   6.2200000e-03
  -3.1370000e-02
  -6.6710000e-02
  -5.7820000e-02
  -6.4870000e-02
  -3.6220000e-02
   1.0470000e-02
   1.7660000e-02
   3.1610000e-02
   1.7160000e-02
   1.3020000e-02
   4.0330000e-02
  -2.9120000e-02
  -2.9720000e-02
  -1.3850000e-02
  -2.1800000e-02
   2.1330000e-02
   2.1400000e-03
   7.1600000e-03
   2.5530000e-02
   1.3650000e-02
  -3.0350000e-02
  -5.8950000e-02
  -3.1890000e-02
  -5.7220000e-02
  -5.0120000e-02
  -1.7960000e-02
  -6.6600000e-03
   3.1280000e-02
   4.8500000e-02
   3.9070000e-02
   3.1310000e-02
   1.3000000e-02
   1.0280000e-02
   2.7560000e-02
   2.4290000e-02
   1.7990000e-02
   5.5700000e-03
  -8.5500000e-03
  -1.0610000e-02
  -5.1820000e-02
  -5.3360000e-02
  -5.3600000e-02
  -5.3250000e-02
   1.2690000e-02
   2.2950000e-02
   4.4390000e-02
   9.6950000e-02
   6.1860000e-02
   6.7700000e-02
   6.6240000e-02
   2.3800000e-02
  -2.4020000e-02
  -7.2660000e-02
  -5.1080000e-02
  -1.9820000e-02
  -4.5320000e-02
  -2.9230000e-02
  -2.1910000e-02
  -6.1700000e-03
   5.0670000e-02
   3.0820000e-02
   2.4350000e-02
   3.7800000e-03
  -3.5700000e-02
  -2.4070000e-02
  -7.6200000e-03
  -8.5000000e-03
   2.9670000e-02
  -4.2200000e-03
  -6.6100000e-03
   9.0500000e-03
  -8.1400000e-03
   2.4760000e-02
   2.2000000e-04
  -2.1170000e-02
  -1.7330000e-02
  -4.7160000e-02
  -1.5380000e-02
  -5.9360000e-02
  -9.3360000e-02
  -5.2830000e-02
  -2.4240000e-02
   1.9110000e-02
   3.6990000e-02
   3.1200000e-02
   4.8670000e-02
   4.3810000e-02
   3.8330000e-02
   9.9000000e-03
  -9.7900000e-03
  -1.1500000e-03
  -4.3100000e-02
  -3.9210000e-02
  -9.2700000e-03
  -2.3630000e-02
   3.4490000e-02
   8.8600000e-03
  -2.4180000e-02
   2.0560000e-02
  -9.6800000e-03
  -4.7700000e-03
   1.2120000e-02
  -4.0990000e-02
  -2.0020000e-02
   1.7600000e-02
   2.1660000e-02
   5.0310000e-02
   3.5950000e-02
  -1.4480000e-02
  -8.5300000e-03
   1.3740000e-02
   3.1450000e-02
   2.3960000e-02
   1.1490000e-02
  -1.2370000e-02
  -3.1670000e-02
   2.7100000e-03
  -5.0200000e-03
  -5.0200000e-03
  -9.0200000e-03
  -7.0990000e-02
  -3.8960000e-02
   1.6070000e-02
   1.7680000e-02
   3.2630000e-02
   1.7880000e-02
   2.2370000e-02
   4.3300000e-03
   7.9800000e-03
   1.5520000e-02
  -4.3600000e-03
   7.3500000e-03
  -9.4600000e-03
  -1.7630000e-02
   1.5440000e-02
  -3.0930000e-02
  -3.3590000e-02
  -7.8100000e-03
  -2.7420000e-02
  -2.3250000e-02
  -2.6100000e-02
  -2.6240000e-02
   2.3740000e-02
   3.5890000e-02
  -6.0600000e-03
  -3.5530000e-02
   2.2150000e-02
   2.4130000e-02
  -2.3000000e-02
   1.9820000e-02
  -7.6500000e-03
  -3.9100000e-02
   3.2380000e-02
   3.0460000e-02
   1.7360000e-02
   9.2700000e-03
  -4.0880000e-02
  -8.8600000e-03
  -1.8780000e-02
  -2.8490000e-02
  -6.5800000e-03
  -3.1530000e-02
  -2.7560000e-02
   1.4970000e-02
   1.8840000e-02
   3.6600000e-02
   4.1150000e-02
   1.2480000e-02
   7.4300000e-03
   5.5360000e-02
   4.8260000e-02
  -2.6210000e-02
  -3.1370000e-02
  -4.3180000e-02
  -5.8480000e-02
  -7.5480000e-02
  -7.6330000e-02
  -3.1670000e-02
  -5.4210000e-02
  -2.4370000e-02
   2.0730000e-02
   7.1800000e-03
   3.3860000e-02
   6.0100000e-02
   3.3890000e-02
   4.0280000e-02
   3.1310000e-02
  -2.6600000e-03
   1.8120000e-02
   6.8300000e-03
  -3.2220000e-02
  -2.4290000e-02
  -3.6550000e-02
  -4.7520000e-02
  -9.4300000e-03
  -1.3540000e-02
  -9.4600000e-03
   5.7300000e-03
  -1.1760000e-02
   7.0440000e-02
   7.5890000e-02
   2.5220000e-02
   6.3690000e-02
   3.7670000e-02
   2.2620000e-02
   7.2400000e-03
  -3.7890000e-02
  -1.1520000e-02
  -3.3150000e-02
  -5.3930000e-02
  -1.3050000e-02
  -1.4830000e-02
  -2.7720000e-02
  -7.2700000e-03
   4.0900000e-03
   4.5680000e-02
   2.7660000e-02
  -1.3130000e-02
   2.0150000e-02
   2.5580000e-02
   2.8200000e-03
  -1.6700000e-02
  -1.0360000e-02
  -6.5300000e-03
  -1.1200000e-03
  -6.8800000e-03
  -4.5980000e-02
  -1.7820000e-02
  -1.2780000e-02
  -7.8720000e-02
  -3.1640000e-02
  -3.4000000e-02
  -4.8670000e-02
   1.0120000e-02
   1.3270000e-02
   3.1750000e-02
   2.0810000e-02
  -3.9500000e-03
   3.3480000e-02
   1.6400000e-02
  -3.8400000e-03
  -2.6270000e-02
  -6.1720000e-02
  -4.7710000e-02
  -4.6610000e-02
  -3.4710000e-02
   9.0500000e-03
   1.0910000e-02
   1.5900000e-03
   1.6290000e-02
   4.1150000e-02
   3.7120000e-02
   3.2520000e-02
   3.1590000e-02
   2.2460000e-02
   3.2740000e-02
   2.1630000e-02
   2.9200000e-02
   6.4400000e-03
  -5.5380000e-02
  -3.3720000e-02
   1.1820000e-02
  -1.8590000e-02
  -3.2980000e-02
  -4.9790000e-02
  -3.4030000e-02
   3.5120000e-02
   3.6250000e-02
   3.4930000e-02
   6.8550000e-02
   2.3200000e-02
   5.2900000e-03
   1.0500000e-02
   1.7500000e-03
   2.0620000e-02
  -6.4240000e-02
  -1.0880000e-01
   2.2800000e-03
  -2.5500000e-03
   1.7300000e-02
   2.4570000e-02
  -2.8270000e-02
  -3.1500000e-03
   4.5200000e-03
   2.0800000e-03
   3.0790000e-02
   1.0940000e-02
  -1.3710000e-02
   6.0000000e-04
   9.5100000e-03
  -6.5500000e-03
  -3.0380000e-02
  -4.4010000e-02
  -1.0340000e-02
  -1.8900000e-03
  -3.8390000e-02
  -1.1540000e-02
  -1.0090000e-02
  -2.4270000e-02
  -1.1000000e-03
  -1.7250000e-02
   1.3650000e-02
   8.1200000e-03
  -2.0040000e-02
   1.7490000e-02
   3.6700000e-03
   5.4300000e-03
   8.0000000e-04
   2.3060000e-02
   4.4800000e-02
   2.0560000e-02
   4.6780000e-02
   4.7380000e-02
   2.2590000e-02
  -1.9600000e-02
  -4.2550000e-02
  -2.7720000e-02
  -4.8390000e-02
  -5.5690000e-02
  -3.6960000e-02
  -1.6040000e-02
  -5.6200000e-03
  -2.1110000e-02
   7.0500000e-03
   2.3220000e-02
   5.3500000e-03
   5.0530000e-02
   3.9780000e-02
   2.9100000e-03
   1.4970000e-02
  -1.9060000e-02
  -1.4890000e-02
  -2.6600000e-02
  -6.3500000e-02
  -4.1480000e-02
  -4.2500000e-03
  -1.3790000e-02
  -8.5000000e-04
  -1.1080000e-02
  -3.3640000e-02
   6.6100000e-03
   9.3800000e-03
   8.8000000e-04
   1.1840000e-02
   9.7300000e-03
   2.8320000e-02
   6.4380000e-02
   4.9350000e-02
   2.9580000e-02
   3.3420000e-02
   2.5640000e-02
   2.6000000e-03
  -2.2540000e-02
  -6.3100000e-03
  -2.1610000e-02
  -4.5380000e-02
  -2.0000000e-03
   5.3700000e-03
   3.2110000e-02
   4.0660000e-02
  -5.5000000e-04
   1.5460000e-02
  -1.3190000e-02
  -5.2640000e-02
   2.7400000e-03
   3.9200000e-03
   9.0000000e-04
   3.6470000e-02
   2.6980000e-02
   2.5640000e-02
   9.0500000e-03
  -1.8010000e-02
  -5.8400000e-03
  -1.6200000e-02
  -2.4100000e-02
  -2.3550000e-02
  -8.3900000e-03
   1.2580000e-02
  -2.1140000e-02
  -1.1950000e-02
   9.2100000e-03
  -5.2890000e-02
  -4.6040000e-02
  -1.3130000e-02
  -7.9500000e-03
  -8.9100000e-03
  -9.3500000e-03
   8.5500000e-03
   2.3090000e-02
   2.4900000e-02
   1.9740000e-02
   9.5400000e-03
  -4.4700000e-03
  -3.8850000e-02
  -4.3620000e-02
  -3.4770000e-02
  -2.7010000e-02
  -2.0100000e-02
  -4.3350000e-02
  -1.6450000e-02
  -2.1800000e-02
  -1.7190000e-02
   1.4480000e-02
   3.3200000e-03
   2.4590000e-02
   1.7220000e-02
   1.2370000e-02
   5.3850000e-02
   1.1490000e-02
   4.0990000e-02
   6.0620000e-02
  -5.5910000e-02
  -3.4140000e-02
   1.6500000e-03
  -3.4880000e-02
  -1.6730000e-02
   8.4200000e-03
   1.7900000e-02
   1.1540000e-02
   4.0770000e-02
   1.7820000e-02
   4.0610000e-02
   8.0910000e-02
  -1.1000000e-03
   1.8420000e-02
   3.5450000e-02
  -3.2380000e-02
   1.9300000e-02
  -1.2100000e-03
  -4.5270000e-02
  -1.4180000e-02
  -4.3130000e-02
  -4.9330000e-02
  -2.6180000e-02
  -1.6920000e-02
   3.9500000e-03
   1.3540000e-02
   3.8100000e-03
   3.0320000e-02
   3.0820000e-02
   1.0420000e-02
   1.3630000e-02
  -8.7200000e-03
  -3.0820000e-02
   2.8200000e-03
  -1.0670000e-02
   4.9100000e-03
   1.8590000e-02
  -4.0000000e-02
   1.4230000e-02
   2.4760000e-02
  -2.9530000e-02
  -2.8500000e-03
  -3.3340000e-02
  -3.9510000e-02
   1.5900000e-03
  -3.6270000e-02
  -1.3850000e-02
   3.1450000e-02
   5.0200000e-03
   1.2390000e-02
   3.0410000e-02
   2.1360000e-02
   2.6430000e-02
   2.8460000e-02
   2.1440000e-02
  -1.8860000e-02
  -4.5270000e-02
  -3.5230000e-02
  -3.3200000e-02
  -3.0190000e-02
   2.6600000e-03
   3.3700000e-03
  -1.2560000e-02
  -3.8900000e-03
   2.5000000e-03
   3.2190000e-02
   2.3690000e-02
   2.3830000e-02
   3.0130000e-02
   1.1080000e-02
   1.5900000e-03
  -3.6200000e-03
  -3.3180000e-02
  -5.3440000e-02
  -4.5790000e-02
  -4.6140000e-02
  -3.1670000e-02
   1.4040000e-02
  -4.5000000e-03
  -2.4100000e-03
   4.5790000e-02
   3.3920000e-02
   5.0610000e-02
   4.0740000e-02
   1.4500000e-02
   2.5830000e-02
  -2.1960000e-02
  -4.1890000e-02
  -5.6200000e-03
  -2.1330000e-02
  -1.2480000e-02
  -3.0930000e-02
  -3.2160000e-02
   5.1000000e-03
  -8.2500000e-03
  -1.0280000e-02
   1.2670000e-02
   5.3200000e-03
   6.8500000e-03
   4.9900000e-02
   6.7230000e-02
   3.2680000e-02
   6.2200000e-03
   1.3200000e-03
  -1.7000000e-03
  -3.4300000e-03
  -4.1650000e-02
  -3.5620000e-02
  -1.3410000e-02
  -2.5830000e-02
   7.8400000e-03
   2.0540000e-02
   2.1280000e-02
   1.6260000e-02
   4.9600000e-03
   9.3000000e-04
   1.1630000e-02
   1.5820000e-02
  -5.2000000e-04
   8.1700000e-03
  -7.1300000e-03
  -1.7300000e-02
   9.5100000e-03
   3.2600000e-03
   1.2090000e-02
   2.1900000e-03
  -2.9640000e-02
  -8.9400000e-03
  -2.7310000e-02
  -4.3700000e-02
  -5.5910000e-02
  -6.3720000e-02
  -1.5820000e-02
  -2.3000000e-03
   2.9890000e-02
   3.5310000e-02
  -6.0600000e-03
  -5.0400000e-03
   1.4640000e-02
   2.5170000e-02
  -7.1000000e-04
  -1.2670000e-02
  -9.3500000e-03
  -3.2100000e-03
  -6.5300000e-03
  -1.4310000e-02
   9.3000000e-04
  -2.4180000e-02
  -2.1990000e-02
   1.1760000e-02
   1.1380000e-02
   3.4790000e-02
   2.2480000e-02
  -1.0060000e-02
   2.5360000e-02
   3.5970000e-02
   1.2690000e-02
   2.6870000e-02
   1.1350000e-02
  -2.7990000e-02
  -1.4090000e-02
  -1.9820000e-02
  -6.9100000e-03
   1.0610000e-02
  -3.7620000e-02
  -3.0000000e-04
   1.1570000e-02
  -1.3160000e-02
   4.0000000e-03
  -3.6880000e-02
  -2.6430000e-02
  -1.2530000e-02
   1.2720000e-02
   5.2780000e-02
   1.0910000e-02
   2.1080000e-02
   5.5300000e-02
   3.4030000e-02
   7.9200000e-03
  -9.5100000e-03
  -3.1370000e-02
  -1.1900000e-02
   1.4800000e-03
  -6.1700000e-03
   1.7850000e-02
  -1.0100000e-03
  -2.2130000e-02
  -3.3200000e-03
   7.1000000e-03
  -2.4760000e-02
  -4.1650000e-02
  -1.8290000e-02
   1.6890000e-02
   3.3070000e-02
   2.1690000e-02
   2.9860000e-02
  -1.5960000e-02
  -4.0440000e-02
  -7.4900000e-03
  -2.2920000e-02
  -2.7880000e-02
  -2.9780000e-02
  -2.6510000e-02
  -1.6370000e-02
  -6.8300000e-03
  -8.2000000e-03
   9.7900000e-03
   3.1610000e-02
   9.7300000e-03
   1.3160000e-02
   4.5600000e-02
   3.0600000e-02
  -8.8600000e-03
  -5.3500000e-03
   4.5160000e-02
   2.4810000e-02
  -2.5470000e-02
  -1.5520000e-02
  -2.3900000e-03
  -3.7920000e-02
  -4.8530000e-02
  -8.1700000e-03
   2.5960000e-02
  -9.4600000e-03
  -1.2560000e-02
   9.0500000e-03
  -1.7770000e-02
   1.3980000e-02
   1.2610000e-02
   4.1100000e-03
   5.0890000e-02
   2.7470000e-02
   2.2480000e-02
   1.8210000e-02
  -2.9150000e-02
  -3.1260000e-02
  -6.4190000e-02
  -6.4380000e-02
  -3.4790000e-02
  -3.2410000e-02
  -3.8300000e-02
   4.5290000e-02
   5.8650000e-02
   2.1660000e-02
   7.2490000e-02
   3.1750000e-02
   1.5190000e-02
   5.3470000e-02
   1.7300000e-02
   4.4580000e-02
   5.2900000e-03
  -3.1610000e-02
   1.7790000e-02
   3.5900000e-03
  -2.8800000e-03
  -2.0590000e-02
  -5.8100000e-02
  -1.4230000e-02
  -5.5710000e-02
  -4.9220000e-02
   2.8620000e-02
   1.0890000e-02
   4.1540000e-02
   3.1810000e-02
  -1.7000000e-03
   3.4960000e-02
  -1.9700000e-03
  -3.0080000e-02
  -2.0000000e-03
  -2.8490000e-02
  -1.5520000e-02
   1.7600000e-02
   1.9440000e-02
   2.8320000e-02
  -3.9800000e-03
   2.6180000e-02
   3.0490000e-02
  -2.1390000e-02
  -3.9890000e-02
  -2.1720000e-02
  -5.8100000e-03
  -2.4050000e-02
  -8.1400000e-03
   2.1580000e-02
   4.3730000e-02
   1.1000000e-04
  -4.9850000e-02
  -7.4900000e-03
  -4.7400000e-03
  -8.6100000e-03
  -1.0140000e-02
  -2.8200000e-03
  -1.8070000e-02
  -4.9460000e-02
  -8.6600000e-03
   2.6430000e-02
   5.7600000e-03
  -3.6520000e-02
  -3.7970000e-02
  -2.7400000e-03
  -1.3190000e-02
   2.3300000e-03
   2.6130000e-02
   5.8400000e-03
   1.0040000e-02
   2.2370000e-02
   4.9400000e-03
   2.2370000e-02
   1.0670000e-02
  -3.3120000e-02
  -2.4840000e-02
   2.7420000e-02
   2.7140000e-02
   1.5000000e-02
   5.3580000e-02
   3.5970000e-02
   2.0760000e-02
   2.2240000e-02
  -1.5160000e-02
  -1.9470000e-02
  -2.5770000e-02
  -2.8620000e-02
  -1.2860000e-02
  -4.4090000e-02
  -3.9510000e-02
   1.6180000e-02
   4.3350000e-02
   5.8870000e-02
   4.0660000e-02
   3.0540000e-02
   2.5830000e-02
  -8.1400000e-03
   5.2400000e-03
  -1.6920000e-02
  -5.9740000e-02
  -1.6530000e-02
  -9.9000000e-03
  -8.8000000e-03
   2.6400000e-02
  -1.8340000e-02
  -1.3820000e-02
   3.3070000e-02
  -7.1600000e-03
   8.3600000e-03
  -1.4500000e-03
  -2.4160000e-02
   4.6100000e-03
  -2.1300000e-02
  -1.4070000e-02
   1.4590000e-02
  -1.5080000e-02
   2.0840000e-02
   4.1810000e-02
   3.3750000e-02
   2.4100000e-02
  -2.4730000e-02
  -3.4190000e-02
  -3.3500000e-03
  -2.8820000e-02
  -2.8650000e-02
  -3.3750000e-02
  -4.5820000e-02
   1.6940000e-02
   1.1270000e-02
  -2.6600000e-03
   4.2200000e-02
   1.3350000e-02
  -1.2120000e-02
   2.8930000e-02
   4.2500000e-03
  -2.7360000e-02
   1.2300000e-03
  -1.0450000e-02
  -1.2450000e-02
  -1.8730000e-02
  -1.5680000e-02
   1.2610000e-02
   1.2040000e-02
   2.0430000e-02
  -2.7140000e-02
  -1.3160000e-02
   3.9670000e-02
   6.6000000e-04
   1.6010000e-02
   2.1330000e-02
  -5.4800000e-03
   2.5530000e-02
   9.4600000e-03
  -2.6920000e-02
   1.1020000e-02
  -5.1800000e-03
  -5.5990000e-02
  -3.2160000e-02
  -1.9600000e-02
  -1.8340000e-02
   1.3680000e-02
   8.0000000e-04
  -8.0900000e-03
  -1.6090000e-02
  -8.3600000e-03
   4.6690000e-02
   3.8800000e-02
  -1.8100000e-03
   2.0590000e-02
  -3.0400000e-03
  -1.5600000e-02
   1.4750000e-02
   7.4000000e-03
   3.0190000e-02
   4.9100000e-03
  -3.4600000e-02
   8.9100000e-03
   2.6600000e-02
  -2.4370000e-02
  -2.6570000e-02
  -9.9000000e-03
  -5.3700000e-03
   5.8400000e-03
  -1.9000000e-02
   1.9200000e-03
   1.7220000e-02
  -1.5600000e-03
   6.5260000e-02
   6.8630000e-02
   1.2170000e-02
   1.5440000e-02
  -1.3110000e-02
  -8.0300000e-03
   6.3300000e-03
  -3.8470000e-02
  -2.4590000e-02
  -1.7990000e-02
  -2.8570000e-02
   1.2750000e-02
   8.2500000e-03
  -2.4700000e-03
  -5.1500000e-03
  -1.2580000e-02
   4.5460000e-02
   2.4650000e-02
  -3.2490000e-02
  -3.4500000e-03
  -4.9600000e-03
  -2.9580000e-02
  -5.4800000e-03
  -7.0200000e-03
  -3.0570000e-02
  -3.7210000e-02
  -3.5420000e-02
  -3.5150000e-02
  -1.4390000e-02
  -3.2400000e-03
  -9.6500000e-03
   1.5080000e-02
   9.4600000e-03
   2.0760000e-02
   1.6670000e-02
  -1.6860000e-02
   2.3250000e-02
   2.2020000e-02
   3.8100000e-03
  -7.8400000e-03
  -5.2150000e-02
  -1.5440000e-02
   9.0000000e-04
  -4.8000000e-03
   1.1870000e-02
  -1.9380000e-02
  -6.6400000e-03
  -5.7300000e-03
  -3.7800000e-03
   2.4480000e-02
   2.9390000e-02
   1.7270000e-02
   3.1640000e-02
   2.9720000e-02
  -1.5050000e-02
  -2.2020000e-02
  -2.3200000e-02
  -2.7120000e-02
   3.9500000e-03
  -1.0860000e-02
   1.2500000e-02
   7.0270000e-02
   4.8670000e-02
   2.9390000e-02
   1.4920000e-02
   2.9170000e-02
   2.0340000e-02
   2.2040000e-02
  -1.6700000e-03
  -2.4100000e-02
  -2.8200000e-03
  -3.1500000e-02
  -3.5780000e-02
  -3.8100000e-03
  -2.2540000e-02
  -1.3020000e-02
  -1.5900000e-02
  -3.6900000e-02
  -2.7500000e-02
  -1.5380000e-02
  -9.6200000e-03
  -2.0020000e-02
  -1.1570000e-02
  -6.6000000e-04
   6.6400000e-03
   3.0820000e-02
   2.4370000e-02
   1.4480000e-02
   2.7700000e-03
  -2.4700000e-03
   8.6100000e-03
   2.5000000e-03
  -1.3330000e-02
  -2.1580000e-02
  -3.0540000e-02
  -4.3510000e-02
  -5.9660000e-02
  -1.3570000e-02
   1.5740000e-02
  -9.5700000e-03
   2.9420000e-02
   2.6600000e-02
   7.8910000e-02
   9.5800000e-02
   1.5680000e-02
   2.7940000e-02
  -2.0620000e-02
  -6.5310000e-02
  -2.0120000e-02
  -4.5760000e-02
  -2.8730000e-02
  -2.6570000e-02
  -4.9020000e-02
   1.1760000e-02
   2.0320000e-02
   2.1100000e-03
   4.9850000e-02
   2.5500000e-02
  -9.4000000e-03
   1.5520000e-02
  -1.5630000e-02
  -3.4350000e-02
  -1.8290000e-02
  -4.9080000e-02
   2.3300000e-03
   2.3660000e-02
  -1.1520000e-02
   2.1690000e-02
   2.2210000e-02
   2.5960000e-02
   2.3280000e-02
  -3.1800000e-03
   8.0600000e-03
  -5.9200000e-03
  -3.5590000e-02
  -6.7700000e-03
  -9.2700000e-03
  -3.0490000e-02
   1.9580000e-02
  -4.0300000e-03
  -5.7740000e-02
   2.2500000e-03
   3.1200000e-02
   1.0500000e-02
   2.3630000e-02
   2.5000000e-03
   1.7000000e-03
  -1.1350000e-02
   7.2900000e-03
   2.5140000e-02
   2.8500000e-03
  -1.0010000e-02
  -2.2510000e-02
  -2.8980000e-02
  -2.1300000e-02
  -1.1790000e-02
  -1.0360000e-02
  -9.9000000e-03
   4.0000000e-02
   3.4330000e-02
   1.7300000e-02
   4.6060000e-02
   2.0000000e-03
   2.9450000e-02
   4.1400000e-02
  -7.1800000e-03
   3.6660000e-02
  -5.3500000e-03
  -3.1310000e-02
   3.5180000e-02
  -1.2830000e-02
  -6.0900000e-03
  -5.5400000e-03
  -7.8960000e-02
  -2.1330000e-02
  -2.5770000e-02
  -5.1570000e-02
  -6.2000000e-03
  -7.0700000e-03
  -1.2170000e-02
  -9.2100000e-03
   4.3900000e-03
   7.5100000e-03
   2.1580000e-02
   2.4870000e-02
  -4.4100000e-03
  -1.7500000e-03
  -1.9000000e-04
  -9.2900000e-03
  -2.9910000e-02
  -4.7300000e-02
  -4.2110000e-02
  -4.8420000e-02
  -6.4680000e-02
  -1.9170000e-02
   4.3300000e-03
  -8.6100000e-03
   2.6430000e-02
   5.7280000e-02
   5.9170000e-02
   6.3690000e-02
   3.8280000e-02
   1.3350000e-02
   1.3080000e-02
  -1.8840000e-02
   1.0200000e-02
  -4.7400000e-03
  -1.4390000e-02
  -1.2910000e-02
  -2.3770000e-02
   1.4150000e-02
  -5.3200000e-03
  -5.2310000e-02
  -2.6510000e-02
   6.5800000e-03
   3.4350000e-02
   3.2740000e-02
   1.5130000e-02
   2.6650000e-02
   4.8420000e-02
   5.8920000e-02
   2.4700000e-02
   3.1390000e-02
   1.7050000e-02
  -1.9800000e-02
   2.7700000e-03
  -2.9560000e-02
  -4.8530000e-02
  -3.7780000e-02
  -3.8630000e-02
  -4.2060000e-02
  -5.1740000e-02
  -6.7400000e-03
   2.0120000e-02
   6.7400000e-03
   3.8520000e-02
   3.2410000e-02
   2.1250000e-02
   5.5490000e-02
   2.1770000e-02
  -1.6810000e-02
  -3.7800000e-03
  -3.4050000e-02
  -6.8110000e-02
  -5.7990000e-02
  -2.5440000e-02
  -1.4300000e-03
  -2.2810000e-02
  -2.8900000e-02
  -3.6190000e-02
  -1.9110000e-02
   1.5240000e-02
   4.3600000e-03
   5.1300000e-03
   1.1380000e-02
  -2.5500000e-03
   3.4520000e-02
   4.6970000e-02
   2.0260000e-02
  -1.9380000e-02
  -2.3090000e-02
  -3.6200000e-03
  -9.4000000e-03
  -1.2580000e-02
  -2.2400000e-02
  -2.9150000e-02
  -6.2800000e-03
  -1.4180000e-02
   2.7470000e-02
   3.0870000e-02
  -5.3200000e-03
   4.3490000e-02
   4.8010000e-02
   4.3840000e-02
   3.0460000e-02
  -2.1500000e-02
  -1.3270000e-02
  -1.8340000e-02
  -4.2440000e-02
  -1.2830000e-02
  -1.4420000e-02
  -1.8340000e-02
   1.5900000e-03
   5.0000000e-05
   2.7720000e-02
   2.7940000e-02
  -5.3500000e-03
   2.1190000e-02
   1.1760000e-02
  -7.2700000e-03
  -8.6900000e-03
  -2.2810000e-02
  -5.5000000e-04
  -1.4560000e-02
  -3.1830000e-02
   3.0400000e-03
  -1.0170000e-02
  -9.4300000e-03
  -1.7140000e-02
  -1.8480000e-02
  -1.4780000e-02
  -1.7050000e-02
  -1.4120000e-02
  -2.5800000e-03
   5.4320000e-02
   6.4930000e-02
   1.6780000e-02
   2.7200000e-02
   4.8610000e-02
   1.5710000e-02
  -5.8400000e-03
  -2.0840000e-02
  -3.3940000e-02
  -1.7550000e-02
   5.8700000e-03
   2.5120000e-02
  -1.0360000e-02
  -1.9030000e-02
   2.5000000e-03
  -1.0140000e-02
   1.2530000e-02
   4.6100000e-03
  -1.2800000e-02
   2.1330000e-02
   5.4970000e-02
   4.9330000e-02
   4.7930000e-02
   3.7070000e-02
  -3.4990000e-02
  -3.9350000e-02
  -3.4030000e-02
  -6.2950000e-02
  -4.8280000e-02
  -6.2600000e-02
  -5.5030000e-02
   2.1470000e-02
   1.2480000e-02
  -1.7550000e-02
   3.0000000e-05
   1.8010000e-02
   3.4190000e-02
   8.5500000e-03
   2.2020000e-02
   1.0120000e-02
  -1.6090000e-02
  -4.6300000e-03
  -7.9000000e-03
   7.9800000e-03
  -1.6070000e-02
  -5.5960000e-02
  -3.2960000e-02
  -3.0410000e-02
  -1.8210000e-02
  -1.6090000e-02
  -3.7540000e-02
   9.6500000e-03
   2.5960000e-02
   1.5380000e-02
   6.7970000e-02
   2.7940000e-02
   9.0800000e-03
   4.0410000e-02
  -2.1300000e-02
  -1.1570000e-02
  -1.7470000e-02
  -5.7220000e-02
   1.6180000e-02
   4.1900000e-03
  -2.1080000e-02
   1.3870000e-02
  -1.5630000e-02
   2.8800000e-03
   4.2250000e-02
   3.7620000e-02
   1.8070000e-02
   9.2900000e-03
   4.8500000e-03
   5.8000000e-04
  -7.5700000e-03
   1.0690000e-02
   1.2260000e-02
  -8.2000000e-03
   4.5620000e-02
   5.7060000e-02
   2.6900000e-03
   3.0740000e-02
   3.0000000e-05
  -1.7490000e-02
   1.7360000e-02
  -2.9910000e-02
  -1.6620000e-02
  -1.0310000e-02
  -5.5930000e-02
  -1.3540000e-02
  -1.6340000e-02
  -3.4740000e-02
  -1.3900000e-02
  -2.9010000e-02
  -7.9800000e-03
   2.0840000e-02
   2.3580000e-02
   3.6440000e-02
   1.4610000e-02
  -1.4940000e-02
  -7.4600000e-03
   2.0600000e-03
  -3.1090000e-02
  -3.9510000e-02
  -3.2570000e-02
  -2.4540000e-02
  -6.3000000e-04
   1.3710000e-02
   1.4120000e-02
   8.6400000e-03
  -1.0910000e-02
  -2.2650000e-02
   4.1570000e-02
   3.9840000e-02
  -3.6500000e-03
   1.5270000e-02
   1.8620000e-02
   3.0570000e-02
   2.7580000e-02
   3.0200000e-03
  -9.8400000e-03
  -3.3780000e-02
  -5.7300000e-02
  -4.2720000e-02
  -5.8700000e-03
   1.3200000e-03
  -3.2160000e-02
  -2.7970000e-02
   3.5860000e-02
   1.4450000e-02
  -4.7200000e-03
   3.3670000e-02
  -5.8100000e-03
   8.6400000e-03
   3.3180000e-02
   3.5730000e-02
   7.1810000e-02
   9.3000000e-04
  -2.3910000e-02
  -2.6650000e-02
  -6.4130000e-02
  -3.6360000e-02
  -8.6590000e-02
  -9.5520000e-02
  -2.6600000e-03
  -7.5400000e-03
   1.1500000e-03
   5.1980000e-02
   4.4060000e-02
   1.0420000e-02
  -1.2720000e-02
   2.7200000e-02
   2.4290000e-02
   1.9740000e-02
   3.4000000e-02
   2.0600000e-03
   6.6100000e-03
  -5.0400000e-03
  -4.4660000e-02
  -1.8510000e-02
  -1.6860000e-02
  -4.8910000e-02
  -1.9770000e-02
   8.3400000e-03
   2.6270000e-02
   4.4640000e-02
   4.0850000e-02
   2.9230000e-02
   1.4120000e-02
  -1.0640000e-02
  -2.7700000e-03
   2.6100000e-02
  -2.1170000e-02
  -4.1180000e-02
  -1.1870000e-02
  -8.4400000e-03
   3.3890000e-02
   2.2920000e-02
  -6.8500000e-03
   1.3700000e-03
  -3.2350000e-02
  -2.8020000e-02
   1.3270000e-02
  -7.1000000e-03
   4.2660000e-02
   4.9960000e-02
   2.4430000e-02
   5.5960000e-02
   5.2600000e-03
  -2.2840000e-02
  -2.4320000e-02
  -4.1350000e-02
  -3.3310000e-02
  -3.1750000e-02
  -1.4120000e-02
   5.0000000e-05
  -7.2900000e-03
   1.0690000e-02
  -2.4540000e-02
  -3.8910000e-02
  -1.2300000e-03
   2.1900000e-03
   1.0360000e-02
   3.2080000e-02
   3.5640000e-02
   2.4400000e-03
  -3.5400000e-03
   1.2970000e-02
  -3.5780000e-02
  -3.9590000e-02
  -5.6210000e-02
  -5.1820000e-02
  -2.4100000e-03
  -2.2950000e-02
  -9.6000000e-04
  -2.8500000e-03
  -1.1020000e-02
   3.3010000e-02
   3.5920000e-02
   2.8930000e-02
   9.4600000e-03
  -1.1600000e-02
   1.3490000e-02
   2.8710000e-02
   1.5900000e-02
  -1.2600000e-03
  -3.2600000e-03
  -1.8010000e-02
  -3.2220000e-02
  -2.6270000e-02
  -4.7790000e-02
  -2.1000000e-02
   6.9900000e-03
   2.6300000e-03
   5.1600000e-02
   4.4310000e-02
   3.6630000e-02
   4.8690000e-02
  -8.9700000e-03
   1.8100000e-03
  -6.1400000e-03
  -1.1100000e-02
   4.8500000e-02
   2.6570000e-02
   2.7340000e-02
   1.5520000e-02
  -2.1720000e-02
  -1.8150000e-02
  -3.3700000e-02
  -5.7440000e-02
  -5.4010000e-02
  -1.5190000e-02
  -1.0610000e-02
   1.5050000e-02
   4.3430000e-02
   1.6560000e-02
   2.9420000e-02
  -4.7200000e-03
  -1.5820000e-02
   2.2400000e-02
  -1.7490000e-02
   9.3500000e-03
   1.1490000e-02
  -2.0650000e-02
   2.3360000e-02
   1.0100000e-03
  -3.2300000e-02
  -9.0500000e-03
  -3.8390000e-02
  -1.2450000e-02
   2.0600000e-03
  -1.5930000e-02
   3.6220000e-02
   3.1340000e-02
   3.1420000e-02
   7.1950000e-02
   2.7170000e-02
   2.1690000e-02
  -1.5000000e-02
  -4.8800000e-02
   2.1100000e-03
  -2.4210000e-02
  -3.7480000e-02
  -4.3300000e-03
  -1.9380000e-02
  -7.9000000e-03
  -6.9400000e-03
  -4.1570000e-02
  -3.2350000e-02
  -3.4300000e-02
  -4.4090000e-02
  -8.8800000e-03
   4.6500000e-02
   3.8740000e-02
   2.6050000e-02
   5.0610000e-02
   1.2370000e-02
  -1.6620000e-02
  -2.4650000e-02
  -9.6000000e-04
  -6.6400000e-03
  -7.6200000e-03
   1.1930000e-02
  -1.5350000e-02
   1.5550000e-02
   3.5510000e-02
  -1.3270000e-02
  -1.0610000e-02
  -2.6000000e-03
  -6.1100000e-03
   1.0140000e-02
  -1.9660000e-02
   1.4700000e-02
   4.8090000e-02
   6.6400000e-03
   1.7800000e-03
   1.4800000e-03
   2.2020000e-02
  -4.2800000e-03
  -5.4210000e-02
  -5.1500000e-03
  -1.1930000e-02
  -5.8000000e-04
   5.5380000e-02
   3.9200000e-03
   2.5880000e-02
   6.9100000e-03
  -5.7960000e-02
   6.0000000e-04
  -3.3200000e-03
  -2.7530000e-02
   2.5720000e-02
   3.8390000e-02
   2.1690000e-02
   2.7390000e-02
   3.1910000e-02
   2.3000000e-02
  -1.9360000e-02
  -3.2080000e-02
  -9.5100000e-03
   4.1100000e-03
   5.3500000e-03
   3.2900000e-03
  -2.9900000e-03
   2.2100000e-02
   4.7700000e-03
  -1.2560000e-02
  -1.2860000e-02
  -4.3510000e-02
  -1.4070000e-02
   2.7310000e-02
   1.0530000e-02
   1.7220000e-02
   1.0040000e-02
  -2.7750000e-02
   7.1800000e-03
   3.6200000e-03
  -6.4570000e-02
  -1.6890000e-02
  -1.5380000e-02
  -2.4900000e-02
   3.2680000e-02
  -6.9400000e-03
   9.2900000e-03
   1.7140000e-02
  -5.0610000e-02
  -2.3580000e-02
  -1.1380000e-02
  -5.9800000e-03
   2.3500000e-02
  -1.6290000e-02
   2.4480000e-02
   8.2860000e-02
   1.9380000e-02
   4.4550000e-02
   1.9710000e-02
  -5.3080000e-02
  -1.2450000e-02
  -5.1550000e-02
  -4.5510000e-02
  -1.0610000e-02
  -9.6800000e-03
   5.0750000e-02
   3.5120000e-02
   1.1270000e-02
   1.3820000e-02
   1.5100000e-03
   2.7450000e-02
   9.7100000e-03
   5.5100000e-03
   1.9880000e-02
   3.3090000e-02
   4.7020000e-02
   1.9710000e-02
  -1.0470000e-02
  -2.5030000e-02
  -4.0850000e-02
  -2.6760000e-02
  -2.7940000e-02
  -4.2000000e-02
  -2.4350000e-02
  -1.3430000e-02
  -1.4310000e-02
   7.1300000e-03
   1.9580000e-02
  -2.2670000e-02
  -1.5740000e-02
   1.5030000e-02
   3.8400000e-03
   3.8220000e-02
   6.9700000e-02
   2.9580000e-02
   4.7300000e-02
   4.4720000e-02
  -1.8950000e-02
   2.6460000e-02
   8.0300000e-03
  -5.8210000e-02
  -1.6590000e-02
  -2.8800000e-03
   1.5630000e-02
   4.6690000e-02
  -1.3790000e-02
  -8.0000000e-05
   2.1330000e-02
  -3.4850000e-02
   4.8500000e-03
  -1.8070000e-02
  -4.5490000e-02
   1.4010000e-02
   1.0470000e-02
  -1.3630000e-02
   3.7800000e-03
   7.3500000e-03
  -1.3650000e-02
  -1.9060000e-02
  -3.7730000e-02
  -3.0760000e-02
  -9.9500000e-03
  -9.1900000e-03
   7.0200000e-03
   1.5520000e-02
   1.7080000e-02
   1.2200000e-02
  -2.0920000e-02
  -2.5500000e-03
   1.4070000e-02
   1.4180000e-02
   6.3880000e-02
   2.8350000e-02
  -2.6900000e-03
   6.8800000e-03
  -4.5800000e-03
   4.7400000e-03
  -2.8790000e-02
  -4.1890000e-02
  -2.2130000e-02
  -2.2840000e-02
  -8.3600000e-03
   9.0800000e-03
   1.9630000e-02
   1.4000000e-03
   7.6200000e-03
  -5.4800000e-03
  -5.8900000e-03
   4.3920000e-02
  -1.4340000e-02
  -1.2940000e-02
  -3.9200000e-03
  -4.2090000e-02
   3.7800000e-03
   1.6340000e-02
   1.3490000e-02
   2.2730000e-02
  -2.6600000e-03
  -1.2610000e-02
  -3.7810000e-02
  -4.8800000e-03
   1.4500000e-02
   2.6650000e-02
   7.5480000e-02
   5.1550000e-02
   1.3710000e-02
   2.5720000e-02
   4.7000000e-04
  -1.2120000e-02
  -1.8450000e-02
  -3.1420000e-02
  -2.6650000e-02
  -1.4120000e-02
  -2.5640000e-02
   9.4900000e-03
   3.4630000e-02
   3.0700000e-03
   1.9710000e-02
   5.0150000e-02
   4.8300000e-03
   2.9150000e-02
   3.4250000e-02
  -1.8480000e-02
   9.6500000e-03
  -1.6180000e-02
  -5.0780000e-02
  -3.4900000e-02
  -3.7400000e-02
  -1.2310000e-02
   7.4900000e-03
   1.0140000e-02
  -3.4000000e-03
  -1.7470000e-02
   9.4300000e-03
   2.9040000e-02
   7.5400000e-03
  -8.8600000e-03
  -6.4200000e-03
  -6.9000000e-04
   4.9400000e-03
   4.0300000e-03
  -1.4780000e-02
  -3.7970000e-02
  -1.9850000e-02
   2.0540000e-02
   1.4180000e-02
  -1.7580000e-02
  -1.6670000e-02
   4.5210000e-02
   4.5490000e-02
   2.3940000e-02
   4.1320000e-02
  -1.7740000e-02
  -4.9100000e-03
  -1.5460000e-02
  -5.5520000e-02
  -1.0230000e-02
  -2.8130000e-02
  -3.7590000e-02
   1.1080000e-02
   2.7230000e-02
   3.3700000e-02
   2.5500000e-03
  -3.4820000e-02
  -3.3610000e-02
  -5.0200000e-02
  -1.9250000e-02
   1.3820000e-02
  -3.2100000e-03
   1.5850000e-02
   3.3010000e-02
   5.4810000e-02
   6.1750000e-02
   6.6600000e-03
  -2.3850000e-02
  -6.8000000e-03
  -1.7740000e-02
  -3.1890000e-02
   1.1870000e-02
   6.5500000e-03
  -2.8130000e-02
   1.5400000e-03
   4.5000000e-03
  -1.9440000e-02
  -4.3900000e-03
  -1.7660000e-02
   4.6300000e-03
   4.2960000e-02
   3.6690000e-02
   5.7470000e-02
   4.9650000e-02
   4.5020000e-02
   1.3190000e-02
  -7.8400000e-03
  -4.4100000e-03
  -8.0030000e-02
  -8.4860000e-02
  -4.7190000e-02
  -5.6620000e-02
  -4.2800000e-03
  -1.2690000e-02
  -1.6590000e-02
   4.2580000e-02
   2.2320000e-02
   5.8760000e-02
   6.4600000e-02
   2.3990000e-02
   4.6860000e-02
   3.9540000e-02
   4.8830000e-02
   2.2480000e-02
  -2.1550000e-02
  -2.8730000e-02
  -4.4060000e-02
  -3.8910000e-02
  -4.0390000e-02
  -2.9150000e-02
   1.8070000e-02
   1.3130000e-02
  -1.4010000e-02
   1.8400000e-02
   2.6460000e-02
   2.1720000e-02
   8.5800000e-03
  -3.3860000e-02
  -3.4000000e-03
   2.4810000e-02
   7.5100000e-03
   3.2000000e-02
   3.4550000e-02
   2.4050000e-02
  -2.8870000e-02
  -5.6020000e-02
  -3.4850000e-02
  -7.2520000e-02
  -4.6090000e-02
  -4.9000000e-04
  -9.2400000e-03
   3.5400000e-03
  -8.4700000e-03
   1.2860000e-02
   3.6710000e-02
   1.2040000e-02
   1.8890000e-02
   2.6790000e-02
   2.2480000e-02
   2.0950000e-02
  -2.3960000e-02
  -3.8550000e-02
  -4.8010000e-02
  -6.7170000e-02
  -5.9740000e-02
  -2.5550000e-02
  -2.7230000e-02
  -4.7710000e-02
   5.5100000e-03
   4.8170000e-02
   5.0230000e-02
   9.3990000e-02
   7.9270000e-02
   5.1440000e-02
   3.4930000e-02
   9.9000000e-04
   3.3480000e-02
   4.2550000e-02
  -1.2480000e-02
  -3.2110000e-02
  -3.4990000e-02
  -2.8760000e-02
  -2.7420000e-02
  -3.1860000e-02
  -5.8370000e-02
  -3.3090000e-02
  -2.1960000e-02
  -2.2200000e-03
   8.6590000e-02
   6.6960000e-02
   2.8710000e-02
   9.0530000e-02
   6.7890000e-02
   2.2430000e-02
   2.5960000e-02
  -1.4810000e-02
  -2.4540000e-02
  -4.3180000e-02
  -8.2500000e-02
  -4.6230000e-02
  -1.0120000e-02
  -3.1970000e-02
  -3.6250000e-02
   4.3600000e-03
   7.4600000e-03
  -1.2390000e-02
  -1.7520000e-02
  -9.9000000e-03
   1.9930000e-02
   2.5140000e-02
   3.6270000e-02
   6.8350000e-02
   4.4610000e-02
   1.4940000e-02
  -1.0450000e-02
  -3.5100000e-03
   7.8400000e-03
  -6.1280000e-02
  -8.3760000e-02
  -4.2280000e-02
  -3.6490000e-02
  -3.0210000e-02
   4.3900000e-03
   1.4700000e-02
   2.4680000e-02
   5.0500000e-02
   3.6600000e-02
   2.8730000e-02
   4.8370000e-02
   6.4200000e-03
   5.2100000e-03
   2.0650000e-02
  -3.6520000e-02
   7.8400000e-03
  -3.0300000e-02
  -5.3550000e-02
   2.1360000e-02
  -4.1350000e-02
  -4.1590000e-02
   2.6300000e-03
  -1.7080000e-02
   2.9420000e-02
   3.7840000e-02
   6.7200000e-03
   2.2980000e-02
   1.3980000e-02
   3.4350000e-02
   7.0270000e-02
   3.3260000e-02
   1.6040000e-02
   1.9850000e-02
   1.4920000e-02
   1.9490000e-02
  -2.3600000e-03
  -2.9090000e-02
  -3.9760000e-02
  -5.0560000e-02
  -8.9270000e-02
  -5.2700000e-02
  -2.4350000e-02
  -4.4720000e-02
   5.0400000e-03
   2.5500000e-02
   1.4970000e-02
   3.6050000e-02
   2.9580000e-02
   2.8840000e-02
   3.1420000e-02
   2.4240000e-02
  -2.8500000e-03
  -4.2060000e-02
  -1.0700000e-03
  -6.9400000e-03
  -1.2890000e-02
   2.6210000e-02
  -4.3240000e-02
  -4.0360000e-02
   1.5570000e-02
  -1.1950000e-02
   9.6000000e-03
  -1.4000000e-04
   8.1700000e-03
   4.8580000e-02
   4.4010000e-02
   5.3190000e-02
   2.0100000e-02
  -2.1100000e-03
  -2.2000000e-04
  -1.1270000e-02
  -3.0000000e-04
  -3.4380000e-02
  -5.4290000e-02
  -3.1480000e-02
  -2.9300000e-03
   1.0940000e-02
  -2.1060000e-02
  -8.6100000e-03
  -2.0150000e-02
  -1.3350000e-02
   1.9550000e-02
   5.4000000e-03
   2.0510000e-02
   1.2340000e-02
   1.1730000e-02
   5.0810000e-02
   2.1800000e-02
   2.5770000e-02
   1.2100000e-03
  -2.0760000e-02
   1.4370000e-02
  -5.2340000e-02
  -3.7700000e-02
  -1.3130000e-02
  -5.4670000e-02
  -2.3360000e-02
  -1.8180000e-02
  -4.5730000e-02
  -1.8750000e-02
  -7.1000000e-04
   7.1800000e-03
   4.3900000e-02
   2.4210000e-02
   3.9040000e-02
   5.6100000e-02
   2.3170000e-02
   1.1680000e-02
   5.0700000e-03
  -7.3500000e-03
  -3.1310000e-02
  -3.4820000e-02
  -2.7640000e-02
  -5.3200000e-03
   3.3400000e-02
  -1.5550000e-02
  -2.3910000e-02
   2.8800000e-03
  -2.0600000e-03
   1.9440000e-02
   2.2260000e-02
   2.2210000e-02
   4.5020000e-02
   4.2500000e-02
   5.1160000e-02
   3.0980000e-02
   2.3000000e-03
  -1.1490000e-02
  -4.9540000e-02
  -2.8460000e-02
  -1.0530000e-02
  -4.7080000e-02
  -1.5400000e-03
   1.7680000e-02
  -8.3900000e-03
  -2.9900000e-03
  -2.1960000e-02
  -4.3050000e-02
  -2.4290000e-02
  -1.6560000e-02
   1.6200000e-03
   3.9210000e-02
   3.3530000e-02
   2.2840000e-02
   4.9380000e-02
   3.8800000e-02
  -7.5400000e-03
   2.6900000e-03
  -1.5330000e-02
  -6.1770000e-02
  -4.4770000e-02
  -3.9590000e-02
  -5.7990000e-02
  -4.2250000e-02
  -2.7200000e-02
  -1.9440000e-02
  -2.8500000e-03
  -1.5000000e-02
  -7.2900000e-03
  -1.0500000e-02
  -6.8800000e-03
   3.2520000e-02
   9.6200000e-03
   3.2600000e-02
   3.9430000e-02
  -2.1850000e-02
  -2.5500000e-03
  -3.2400000e-03
  -3.8170000e-02
  -2.8510000e-02
  -1.3300000e-02
   7.9200000e-03
   4.6600000e-03
   3.9920000e-02
   7.8280000e-02
   3.4570000e-02
   2.5940000e-02
   1.4120000e-02
  -3.8000000e-02
   5.4600000e-03
   2.7970000e-02
   1.2560000e-02
   2.7420000e-02
   8.7200000e-03
  -1.8750000e-02
   1.7270000e-02
  -7.2100000e-03
  -1.0610000e-02
  -1.0140000e-02
  -5.4150000e-02
  -1.0800000e-02
  -2.7860000e-02
  -2.4020000e-02
   1.0310000e-02
  -3.0020000e-02
   2.6600000e-03
  -2.0560000e-02
  -8.7200000e-03
   2.4240000e-02
  -2.6510000e-02
   2.8710000e-02
   5.7520000e-02
   1.1300000e-02
   2.7500000e-02
   1.4780000e-02
   8.1400000e-03
   3.3720000e-02
  -1.3350000e-02
  -5.0010000e-02
  -3.8820000e-02
  -5.5660000e-02
  -2.6950000e-02
   5.2000000e-04
  -3.4660000e-02
  -4.9000000e-04
   2.6490000e-02
   1.5710000e-02
   7.0330000e-02
   1.5110000e-02
  -1.3740000e-02
   2.2920000e-02
  -2.2130000e-02
  -5.5700000e-03
   1.9140000e-02
  -4.2830000e-02
  -3.6740000e-02
  -1.9580000e-02
  -4.6010000e-02
   8.1400000e-03
  -1.1500000e-03
  -2.2890000e-02
   1.9630000e-02
   1.3000000e-02
   1.2670000e-02
   2.7940000e-02
   2.2370000e-02
   5.4000000e-03
  -1.1570000e-02
  -4.2220000e-02
  -2.8760000e-02
   3.9590000e-02
   1.0830000e-02
   1.9220000e-02
   2.8490000e-02
   2.0600000e-03
  -2.5200000e-03
  -3.2710000e-02
  -3.4630000e-02
  -4.0550000e-02
  -4.7870000e-02
  -3.0300000e-02
  -7.1000000e-04
   1.3790000e-02
  -8.9700000e-03
  -4.9000000e-04
   1.3190000e-02
   1.6420000e-02
   1.4000000e-03
  -8.8000000e-03
   1.5880000e-02
   2.9900000e-03
   2.0540000e-02
   4.4420000e-02
   2.1250000e-02
  -8.0100000e-03
  -6.0050000e-02
  -4.3510000e-02
   9.2400000e-03
  -3.0160000e-02
  -4.1020000e-02
  -1.3430000e-02
   2.5500000e-03
   4.2250000e-02
   7.4770000e-02
   7.0410000e-02
   8.6340000e-02
   2.9890000e-02
  -5.6500000e-03
   1.7680000e-02
  -8.1400000e-03
  -3.2400000e-03
  -2.3330000e-02
  -4.4280000e-02
  -4.4530000e-02
  -4.9050000e-02
   1.3130000e-02
   1.5220000e-02
  -6.8800000e-03
  -3.0320000e-02
  -1.1300000e-02
   2.4840000e-02
   8.5000000e-03
   1.6180000e-02
   1.3160000e-02
   6.6100000e-03
   2.0590000e-02
   5.5100000e-03
   3.6900000e-02
   4.6890000e-02
  -1.3270000e-02
  -9.9800000e-03
   1.3190000e-02
   2.3580000e-02
   7.0700000e-03
  -4.5760000e-02
  -5.0700000e-02
  -7.3180000e-02
  -5.5030000e-02
  -3.5370000e-02
  -2.6730000e-02
   2.1000000e-02
  -4.2800000e-03
  -1.5440000e-02
   3.5530000e-02
   2.7390000e-02
   2.7280000e-02
   1.1820000e-02
   3.2100000e-03
   1.7740000e-02
  -2.1900000e-03
   7.4600000e-03
  -3.0200000e-03
  -2.5990000e-02
  -5.1220000e-02
  -3.4110000e-02
  -4.7540000e-02
  -5.0480000e-02
  -2.1720000e-02
  -1.2720000e-02
   5.7300000e-03
   1.5820000e-02
   2.3170000e-02
   4.1020000e-02
   4.5980000e-02
   4.4610000e-02
   3.3400000e-02
   4.3900000e-02
   2.8760000e-02
  -2.2430000e-02
  -2.7450000e-02
  -3.5400000e-03
   7.2400000e-03
   9.4600000e-03
   9.1000000e-03
  -7.5900000e-03
  -2.5770000e-02
  -3.0020000e-02
  -3.1120000e-02
  -2.6810000e-02
   1.1200000e-03
   1.3270000e-02
   3.0740000e-02
   4.2470000e-02
   3.8500000e-02
  -2.3900000e-03
   2.0600000e-03
   1.1020000e-02
   1.8750000e-02
   3.0520000e-02
  -2.5440000e-02
  -3.6490000e-02
  -2.4920000e-02
  -4.2550000e-02
  -7.1000000e-03
  -4.9100000e-03
  -2.1740000e-02
   1.0720000e-02
   3.1300000e-03
   1.6070000e-02
   5.6230000e-02
   3.2460000e-02
   1.1800000e-03
   5.0400000e-03
  -2.2700000e-02
  -5.9500000e-03
  -2.2200000e-03
   1.9500000e-03
  -4.8300000e-03
  -5.9200000e-02
  -1.9910000e-02
  -1.6670000e-02
  -3.5120000e-02
   1.2500000e-02
   1.5240000e-02
  -9.0500000e-03
   3.1800000e-03
   1.1600000e-02
  -2.0430000e-02
   1.7080000e-02
   4.2880000e-02
   2.7720000e-02
   2.4870000e-02
   9.0800000e-03
   1.2170000e-02
   1.0700000e-03
  -4.8000000e-03
  -3.0700000e-03
  -3.7860000e-02
  -4.7700000e-03
   9.8700000e-03
  -8.0300000e-03
   4.4400000e-03
  -1.6260000e-02
  -1.7270000e-02
   1.8480000e-02
  -8.8300000e-03
  -2.5990000e-02
  -1.7600000e-02
  -1.8840000e-02
   8.9100000e-03
   1.0750000e-02
   2.2200000e-03
  -9.0500000e-03
  -3.8900000e-03
   1.2640000e-02
   3.0710000e-02
   2.6070000e-02
  -2.1990000e-02
  -3.8910000e-02
  -2.5640000e-02
  -1.7080000e-02
  -1.7990000e-02
  -3.7800000e-03
  -7.1300000e-03
  -3.1390000e-02
   3.0650000e-02
   4.5400000e-02
   1.3540000e-02
   6.7090000e-02
   1.9520000e-02
  -3.7600000e-03
   4.4090000e-02
   1.4530000e-02
  -1.1600000e-02
  -3.4550000e-02
  -5.3030000e-02
   4.0900000e-03
   8.5500000e-03
  -2.0540000e-02
  -4.0000000e-03
  -1.4230000e-02
  -6.0000000e-03
   3.2160000e-02
  -9.1300000e-03
   6.9000000e-04
   1.6120000e-02
  -1.7140000e-02
   3.4710000e-02
   5.8510000e-02
   8.0000000e-04
   2.5530000e-02
   1.3870000e-02
  -3.5560000e-02
  -1.9080000e-02
  -3.9670000e-02
  -5.2070000e-02
  -1.6150000e-02
  -2.2800000e-03
  -4.1100000e-03
  -2.3420000e-02
  -7.0700000e-03
  -5.2600000e-03
   1.2280000e-02
   1.1410000e-02
   8.0100000e-03
   3.3400000e-02
   1.3680000e-02
   2.5610000e-02
   6.3230000e-02
   3.3230000e-02
  -9.6500000e-03
  -1.2260000e-02
  -3.5260000e-02
  -3.9100000e-02
  -1.2090000e-02
  -3.9730000e-02
  -4.7520000e-02
  -2.6380000e-02
  -3.8960000e-02
  -2.0040000e-02
   9.2900000e-03
   6.5000000e-03
   1.6920000e-02
   6.3600000e-03
   3.7780000e-02
   3.8470000e-02
   6.9900000e-03
   4.3980000e-02
   3.1300000e-03
  -1.5240000e-02
   1.0580000e-02
  -3.6140000e-02
  -8.6100000e-03
  -2.3360000e-02
  -6.1010000e-02
   1.8920000e-02
   1.6860000e-02
  -1.1190000e-02
   4.7380000e-02
   2.6870000e-02
  -9.6000000e-03
   1.0100000e-03
   9.7600000e-03
   3.1120000e-02
   6.3300000e-03
   8.1700000e-03
   2.6180000e-02
   5.1800000e-03
   3.4740000e-02
   1.3050000e-02
  -2.4760000e-02
   2.1170000e-02
  -1.4000000e-04
  -6.2980000e-02
  -5.0120000e-02
  -3.4790000e-02
  -4.8720000e-02
  -1.9520000e-02
  -1.2690000e-02
  -2.8300000e-02
   1.6560000e-02
   1.2340000e-02
   3.8550000e-02
   6.6460000e-02
   9.0200000e-03
   3.4770000e-02
  -6.3100000e-03
  -3.2240000e-02
   1.8600000e-03
  -2.6380000e-02
  -9.1900000e-03
  -3.9810000e-02
  -2.7910000e-02
   1.9550000e-02
  -2.4370000e-02
   2.8840000e-02
   1.9110000e-02
  -1.0970000e-02
   5.3820000e-02
   2.5990000e-02
   1.8530000e-02
   3.1310000e-02
  -1.1540000e-02
  -1.0910000e-02
  -5.6500000e-03
  -1.4010000e-02
  -3.1150000e-02
  -1.3080000e-02
  -4.9100000e-03
  -3.9650000e-02
  -2.4020000e-02
  -3.0490000e-02
  -3.7290000e-02
   1.6620000e-02
   1.9820000e-02
   6.8500000e-03
   2.4590000e-02
   9.9000000e-03
   2.4050000e-02
   5.2010000e-02
   3.4630000e-02
   4.6600000e-03
  -4.6900000e-03
   1.6750000e-02
   4.9400000e-03
  -2.6490000e-02
   2.1800000e-02
   7.4300000e-03
  -2.6300000e-03
   1.0640000e-02
  -3.9650000e-02
   1.4810000e-02
   2.8240000e-02
  -4.4010000e-02
  -1.2890000e-02
  -2.1280000e-02
  -1.3270000e-02
   9.1000000e-03
  -5.6800000e-03
   4.1180000e-02
   1.8900000e-03
  -2.7450000e-02
   6.9600000e-03
  -2.1390000e-02
  -1.4070000e-02
   4.6600000e-03
  -3.2960000e-02
   4.4400000e-03
   2.2240000e-02
  -3.2100000e-03
   3.4800000e-03
  -2.6710000e-02
  -4.5000000e-03
  -8.3600000e-03
  -2.6510000e-02
   9.3800000e-03
  -1.0120000e-02
   1.4750000e-02
   4.9930000e-02
   2.9310000e-02
   6.9900000e-03
  -1.7520000e-02
  -3.4410000e-02
  -2.2200000e-03
   3.0870000e-02
   4.4660000e-02
   4.1180000e-02
  -1.3820000e-02
  -3.7430000e-02
  -3.5100000e-03
  -4.7700000e-03
   1.1130000e-02
  -3.6500000e-03
  -3.8740000e-02
  -8.4200000e-03
  -1.8510000e-02
   0.0000000e+00
   3.9020000e-02
   1.1210000e-02
   1.7190000e-02
   1.7250000e-02
   2.7030000e-02
  -1.6200000e-03
  -2.7580000e-02
  -7.3800000e-03
  -6.2000000e-03
  -2.4050000e-02
  -5.2560000e-02
  -2.1410000e-02
   2.1990000e-02
   7.1600000e-03
   2.5200000e-03
  -3.0570000e-02
  -8.9400000e-03
   2.8950000e-02
   3.6000000e-04
   2.3990000e-02
   3.4820000e-02
  -1.8560000e-02
   5.8900000e-03
   1.8560000e-02
  -7.4000000e-03
  -1.3020000e-02
  -2.3360000e-02
   2.5360000e-02
   5.1600000e-02
   1.1190000e-02
   1.1130000e-02
   1.4090000e-02
   4.9000000e-04
   1.2090000e-02
  -2.6100000e-02
   1.8400000e-03
   3.6050000e-02
  -3.8140000e-02
   2.7100000e-03
   5.6700000e-02
  -5.2600000e-03
  -1.5220000e-02
  -2.9470000e-02
  -3.5670000e-02
   8.2000000e-04
  -5.4100000e-02
  -2.5910000e-02
   2.3580000e-02
   3.8400000e-03
   2.2200000e-03
  -1.9960000e-02
   1.7880000e-02
   7.1000000e-03
  -4.5290000e-02
  -1.4200000e-02
  -7.0200000e-03
  -7.1300000e-03
  -1.3570000e-02
   2.0890000e-02
   4.5820000e-02
   3.8000000e-04
   1.1730000e-02
   3.4300000e-02
  -2.8620000e-02
  -9.0500000e-03
   2.2000000e-04
  -1.2890000e-02
   2.4540000e-02
  -4.8300000e-03
  -1.9850000e-02
   2.6300000e-03
   5.9800000e-03
  -9.9500000e-03
  -2.6490000e-02
  -1.9660000e-02
  -3.5900000e-03
  -6.9000000e-04
   5.7610000e-02
   3.5370000e-02
   7.0500000e-03
   3.7370000e-02
   1.1000000e-04
  -4.8090000e-02
  -4.8280000e-02
  -6.9480000e-02
  -1.8890000e-02
  -6.6000000e-04
  -2.9090000e-02
   2.4400000e-02
   1.7850000e-02
   4.4310000e-02
   6.4210000e-02
   2.5940000e-02
   6.2380000e-02
   4.2110000e-02
   2.0510000e-02
   5.1350000e-02
   1.6780000e-02
  -4.8300000e-03
  -2.3030000e-02
  -6.1360000e-02
  -4.2580000e-02
  -1.8730000e-02
  -4.5080000e-02
  -4.7080000e-02
   5.5100000e-03
  -2.2780000e-02
   2.8100000e-02
   6.6160000e-02
   3.3500000e-03
   3.3000000e-04
  -1.9630000e-02
  -2.3610000e-02
   6.8000000e-03
  -3.0520000e-02
  -1.9140000e-02
   5.8900000e-03
  -1.3200000e-03
  -1.8100000e-03
  -1.0990000e-02
  -5.1300000e-02
  -4.4640000e-02
  -2.4480000e-02
  -4.6560000e-02
  -3.4500000e-03
   1.1380000e-02
   3.4990000e-02
   9.6370000e-02
   5.7280000e-02
   4.6750000e-02
   5.0640000e-02
   8.4200000e-03
   1.7600000e-02
   2.0600000e-03
  -6.9400000e-03
   1.9220000e-02
  -1.9550000e-02
  -1.5490000e-02
  -1.4370000e-02
  -4.8040000e-02
  -3.4660000e-02
  -4.2030000e-02
  -6.1800000e-02
  -4.3900000e-03
   1.6260000e-02
   3.4250000e-02
   7.4740000e-02
   2.5010000e-02
   4.4990000e-02
   6.2710000e-02
   1.3000000e-02
   2.4700000e-03
  -5.8810000e-02
  -5.9280000e-02
  -7.7600000e-03
  -5.6290000e-02
  -4.6780000e-02
   3.9500000e-03
  -3.9370000e-02
  -2.8570000e-02
  -7.6500000e-03
  -6.5800000e-03
   1.8920000e-02
   4.9000000e-04
   1.3570000e-02
   4.5400000e-02
   6.6570000e-02
   8.7330000e-02
   4.6670000e-02
  -2.8800000e-03
  -1.8400000e-02
  -5.2730000e-02
  -5.2620000e-02
  -3.0980000e-02
  -4.9110000e-02
  -5.1490000e-02
  -2.6900000e-02
   2.3610000e-02
   2.3880000e-02
   1.4340000e-02
   4.4030000e-02
   8.5300000e-03
   2.8500000e-03
   2.8900000e-02
   3.4710000e-02
   2.4590000e-02
   9.3200000e-03
   1.7030000e-02
  -1.0450000e-02
  -1.0390000e-02
  -2.5420000e-02
  -2.7230000e-02
  -2.3520000e-02
  -4.7950000e-02
  -1.6010000e-02
   1.6340000e-02
  -5.8700000e-03
  -4.3900000e-03
   1.5270000e-02
   1.0230000e-02
   1.1570000e-02
   2.5310000e-02
  -7.6800000e-03
   2.8190000e-02
   4.2310000e-02
   1.1800000e-03
   3.8100000e-03
  -2.2780000e-02
  -2.4620000e-02
  -2.1110000e-02
  -3.7620000e-02
  -4.9430000e-02
  -5.2730000e-02
  -1.6510000e-02
  -4.5800000e-03
  -2.4050000e-02
   2.1170000e-02
   5.5410000e-02
   1.8730000e-02
   1.9080000e-02
   7.0200000e-03
  -2.9970000e-02
   7.5400000e-03
   2.7700000e-03
  -1.9990000e-02
   5.1500000e-03
  -1.7140000e-02
  -9.4900000e-03
  -1.3540000e-02
  -6.3860000e-02
  -4.4090000e-02
  -2.5640000e-02
  -1.0640000e-02
   2.4400000e-02
   1.9710000e-02
   5.4430000e-02
   6.9610000e-02
   6.4730000e-02
   5.6890000e-02
   2.7940000e-02
  -1.6000000e-04
  -1.0500000e-02
  -9.9300000e-03
  -4.0110000e-02
  -4.7490000e-02
  -9.7600000e-03
  -1.4280000e-02
  -5.9200000e-03
  -2.7390000e-02
  -2.4460000e-02
   2.2670000e-02
   6.4200000e-03
   2.7530000e-02
   4.5900000e-02
   3.8690000e-02
   6.7200000e-02
   3.6930000e-02
   4.2500000e-03
   7.1000000e-03
  -5.9280000e-02
  -6.2650000e-02
  -6.5910000e-02
  -9.5310000e-02
  -4.4750000e-02
  -2.3390000e-02
  -1.7740000e-02
  -4.2500000e-03
  -2.5360000e-02
   6.5300000e-03
   2.5860000e-02
  -2.3740000e-02
  -1.7550000e-02
   8.8000000e-04
  -7.9200000e-03
   5.1500000e-03
   3.1560000e-02
   1.2150000e-02
   4.4640000e-02
   4.7650000e-02
  -6.1580000e-02
  -3.3890000e-02
  -4.3160000e-02
  -3.8140000e-02
  -8.5300000e-03
  -2.2150000e-02
   2.3500000e-02
   5.7900000e-03
   2.6600000e-03
   2.7770000e-02
   8.9700000e-03
  -1.5190000e-02
  -6.4700000e-03
   5.1300000e-03
   2.9890000e-02
   5.9880000e-02
   1.9140000e-02
   9.1000000e-03
   2.8190000e-02
  -1.2720000e-02
  -2.6270000e-02
  -6.3720000e-02
  -6.6130000e-02
  -9.2400000e-03
  -6.0620000e-02
  -2.6100000e-02
   3.9240000e-02
  -1.3700000e-03
   2.3470000e-02
   4.0770000e-02
   6.7700000e-03
   3.4800000e-03
  -2.8000000e-03
  -1.1520000e-02
   1.8320000e-02
   1.4670000e-02
  -1.3400000e-03
   1.9060000e-02
  -1.5790000e-02
  -3.2380000e-02
   1.0100000e-03
  -2.7310000e-02
  -3.4190000e-02
  -3.1310000e-02
  -1.6750000e-02
   2.5640000e-02
   1.2860000e-02
   4.3000000e-03
  -3.9200000e-03
  -1.5270000e-02
  -1.0990000e-02
  -4.5270000e-02
  -2.6730000e-02
  -3.1450000e-02
  -4.6780000e-02
   3.6850000e-02
   3.2050000e-02
   1.9490000e-02
   2.2590000e-02
  -2.6540000e-02
  -1.1300000e-02
  -4.0520000e-02
  -3.9700000e-02
   2.0800000e-03
  -1.8600000e-03
   2.0730000e-02
  -1.2900000e-03
  -6.6600000e-03
   1.5110000e-02
  -2.5330000e-02
  -4.6300000e-03
   3.7370000e-02
   1.0400000e-03
   8.6100000e-03
   4.1840000e-02
   3.4300000e-02
   2.2780000e-02
   5.9800000e-03
  -1.6420000e-02
  -1.8210000e-02
  -3.1810000e-02
  -2.8050000e-02
  -2.1850000e-02
  -2.3660000e-02
  -1.5460000e-02
  -5.7900000e-03
   3.7300000e-03
   4.7700000e-03
  -1.8590000e-02
  -3.0240000e-02
  -2.2430000e-02
  -1.9170000e-02
  -1.3410000e-02
  -8.8800000e-03
   8.8000000e-03
   2.8820000e-02
   6.6400000e-03
  -1.2480000e-02
  -1.3650000e-02
  -4.9300000e-02
  -4.4830000e-02
  -2.3720000e-02
  -1.9190000e-02
  -7.2700000e-03
   1.2010000e-02
   1.9580000e-02
   1.5400000e-03
   7.9200000e-03
   1.6010000e-02
   1.7520000e-02
   3.4140000e-02
   1.7190000e-02
   3.0870000e-02
   3.9290000e-02
   5.2940000e-02
   4.6800000e-02
   2.6900000e-03
  -2.8540000e-02
  -5.9520000e-02
  -2.1080000e-02
   9.0000000e-04
  -3.4520000e-02
  -1.0560000e-02
  -5.3200000e-03
  -3.2400000e-03
   5.1850000e-02
   4.1540000e-02
   2.4510000e-02
  -8.2000000e-04
  -5.1680000e-02
  -3.0320000e-02
  -1.7850000e-02
  -2.9580000e-02
  -1.3330000e-02
  -1.9490000e-02
  -1.6500000e-03
   1.9500000e-03
  -3.1830000e-02
  -1.9910000e-02
  -2.1250000e-02
  -4.8890000e-02
  -9.7100000e-03
   2.4730000e-02
   3.4500000e-03
   3.4930000e-02
   7.6200000e-03
  -2.3910000e-02
  -4.7700000e-03
  -2.1500000e-02
  -2.4950000e-02
  -1.9910000e-02
  -1.5570000e-02
  -2.0300000e-03
   6.9100000e-03
   1.2900000e-03
  -8.4700000e-03
  -2.3990000e-02
  -3.0190000e-02
  -3.5230000e-02
  -2.8210000e-02
   1.8890000e-02
   2.8540000e-02
   2.6070000e-02
   3.4790000e-02
   3.5620000e-02
   5.2670000e-02
   1.6500000e-03
  -1.6150000e-02
   3.9800000e-03
  -2.5090000e-02
  -2.3720000e-02
  -1.6260000e-02
  -1.6090000e-02
  -3.8690000e-02
  -3.6140000e-02
  -8.6900000e-03
  -8.3400000e-03
   1.7270000e-02
   1.3110000e-02
   4.0500000e-02
   3.7540000e-02
   3.5810000e-02
   8.1510000e-02
   4.8830000e-02
   3.4270000e-02
   1.5490000e-02
  -4.0440000e-02
  -2.1250000e-02
  -3.5950000e-02
  -5.7410000e-02
  -2.2780000e-02
  -4.0250000e-02
  -2.6290000e-02
   3.0200000e-03
  -7.3800000e-03
   6.9100000e-03
  -6.0000000e-03
  -1.6620000e-02
  -1.0720000e-02
   7.9500000e-03
   4.2960000e-02
   2.0760000e-02
   1.2260000e-02
   5.2100000e-03
  -2.4270000e-02
  -2.7450000e-02
  -6.2050000e-02
  -5.1710000e-02
  -4.3980000e-02
  -5.5330000e-02
  -1.4530000e-02
   8.8300000e-03
  -4.6600000e-03
   6.2500000e-03
  -2.7100000e-03
  -5.2000000e-04
   3.5100000e-02
   5.4180000e-02
   5.5030000e-02
   6.4600000e-02
   3.6410000e-02
   8.3900000e-03
   1.6780000e-02
   5.8000000e-04
  -2.7090000e-02
  -4.4060000e-02
  -3.6550000e-02
  -3.4880000e-02
  -5.1130000e-02
  -1.0010000e-02
  -1.8400000e-03
   2.5000000e-03
   2.5470000e-02
   2.8820000e-02
   3.8000000e-02
   3.7210000e-02
   1.4000000e-03
   3.1500000e-03
   7.0200000e-03
  -5.1500000e-03
  -9.9000000e-03
  -1.7050000e-02
  -3.1910000e-02
  -6.1720000e-02
  -6.0130000e-02
  -2.1520000e-02
  -1.7360000e-02
  -6.0370000e-02
  -3.0490000e-02
   1.9710000e-02
   5.4040000e-02
   5.4750000e-02
   3.9500000e-03
   6.2000000e-03
  -4.9100000e-03
  -4.7000000e-04
   3.2680000e-02
   2.1140000e-02
  -1.2100000e-03
   2.4160000e-02
   3.1000000e-03
   2.1880000e-02
   1.4890000e-02
  -5.9030000e-02
  -1.9410000e-02
  -6.4400000e-03
  -3.5010000e-02
   1.6810000e-02
  -8.2800000e-03
  -1.8780000e-02
   4.2310000e-02
   9.1000000e-03
   3.6380000e-02
   5.1350000e-02
  -1.5900000e-02
  -6.8300000e-03
   2.5720000e-02
   1.1760000e-02
   2.1550000e-02
   3.0400000e-03
  -1.6150000e-02
  -2.0020000e-02
  -5.1240000e-02
  -4.9020000e-02
  -1.4500000e-03
  -1.8340000e-02
  -2.4620000e-02
   2.2920000e-02
   2.4210000e-02
   3.0930000e-02
   1.5080000e-02
  -4.4100000e-03
   5.8920000e-02
  -7.4900000e-03
  -5.1190000e-02
   1.3220000e-02
  -9.8400000e-03
   1.6750000e-02
  -1.0830000e-02
  -7.4550000e-02
   2.2200000e-03
  -3.1200000e-02
  -3.8930000e-02
   2.4900000e-02
  -2.8930000e-02
  -2.4920000e-02
   1.0890000e-02
   1.6370000e-02
   2.0480000e-02
  -2.6300000e-03
  -2.5580000e-02
  -1.3710000e-02
  -1.8590000e-02
  -3.5340000e-02
  -2.4400000e-03
  -2.8320000e-02
  -5.2830000e-02
   9.9000000e-04
   2.4540000e-02
   3.3420000e-02
  -1.4890000e-02
   8.0000000e-05
   2.9970000e-02
  -2.1580000e-02
  -7.6800000e-03
   1.9820000e-02
  -9.9000000e-04
   1.4640000e-02
   3.6660000e-02
   6.5470000e-02
   8.0170000e-02
   4.5950000e-02
  -1.4000000e-04
   2.2000000e-04
   2.0560000e-02
   5.7600000e-03
  -1.0640000e-02
  -2.3000000e-02
  -7.7000000e-03
  -1.7960000e-02
  -2.5910000e-02
   2.3520000e-02
  -1.1540000e-02
   9.4600000e-03
   4.5400000e-02
  -4.4000000e-04
   1.4150000e-02
  -2.3880000e-02
  -2.5990000e-02
   3.5600000e-03
  -1.3850000e-02
   8.5300000e-03
  -2.4510000e-02
  -4.8090000e-02
  -1.0170000e-02
  -4.4860000e-02
  -2.1110000e-02
   6.1400000e-03
  -2.6810000e-02
   1.2310000e-02
   1.6920000e-02
   8.5300000e-03
   2.7800000e-02
  -1.7030000e-02
  -2.1060000e-02
  -4.7200000e-03
  -3.5970000e-02
   2.2650000e-02
   4.7730000e-02
  -2.1720000e-02
   1.1080000e-02
   5.2000000e-04
  -3.7540000e-02
   1.8700000e-02
  -2.7390000e-02
  -2.2260000e-02
   4.0000000e-02
  -3.8900000e-03
   1.1950000e-02
   1.9270000e-02
  -7.1600000e-03
   1.2530000e-02
  -1.4280000e-02
  -3.3500000e-03
   3.0300000e-02
   5.3200000e-03
   1.5270000e-02
   3.3230000e-02
   1.1730000e-02
   1.6480000e-02
   2.2810000e-02
  -1.8450000e-02
  -4.7520000e-02
  -4.9130000e-02
  -7.0740000e-02
  -3.2460000e-02
  -2.5170000e-02
  -5.0420000e-02
  -3.3370000e-02
   1.2100000e-03
   1.8890000e-02
   5.8260000e-02
   9.0700000e-02
   4.2250000e-02
   3.3970000e-02
   3.8960000e-02
  -2.4100000e-03
   6.0290000e-02
   2.5770000e-02
  -7.2000000e-02
  -4.0880000e-02
  -5.0200000e-02
  -7.0900000e-02
  -4.3020000e-02
  -3.0190000e-02
  -4.1350000e-02
  -4.6100000e-03
   3.4220000e-02
   7.7350000e-02
   1.0707000e-01
   5.5410000e-02
   1.5550000e-02
   1.6920000e-02
   4.9000000e-04
  -1.0400000e-03
  -3.2460000e-02
  -6.2050000e-02
  -3.6440000e-02
  -7.8030000e-02
  -2.3470000e-02
   3.6600000e-02
  -4.2000000e-02
  -1.2230000e-02
  -6.3000000e-04
  -1.7990000e-02
   5.7770000e-02
   6.9100000e-03
   3.7600000e-03
   1.0038000e-01
   4.5350000e-02
   5.8700000e-02
   7.8800000e-02
   3.1590000e-02
   4.3290000e-02
   2.0810000e-02
  -4.0440000e-02
  -3.7920000e-02
  -1.3130000e-02
  -7.6090000e-02
  -4.8040000e-02
   2.7880000e-02
  -5.4620000e-02
   2.5000000e-03
   3.4600000e-02
  -1.9960000e-02
   2.1470000e-02
  -9.8400000e-03
  -1.6780000e-02
   1.5000000e-02
  -3.3560000e-02
   3.5400000e-03
   1.0990000e-02
  -6.7560000e-02
  -6.2840000e-02
  -5.7630000e-02
  -5.6020000e-02
  -4.3020000e-02
  -8.3570000e-02
  -6.0020000e-02
  -1.0530000e-02
  -7.7300000e-03
   3.8910000e-02
   6.3120000e-02
   6.4300000e-02
   6.8870000e-02
   6.1580000e-02
   3.7670000e-02
   2.5660000e-02
   1.0830000e-02
  -2.1100000e-03
   1.9600000e-02
   4.1480000e-02
   4.2500000e-03
   1.6010000e-02
   3.7600000e-03
  -4.5020000e-02
  -2.8080000e-02
  -4.3050000e-02
  -2.4680000e-02
  -6.6900000e-03
  -3.3150000e-02
   9.8200000e-03
   3.9150000e-02
   1.8320000e-02
   1.3930000e-02
   3.2190000e-02
   3.4680000e-02
   2.9670000e-02
   3.3180000e-02
   2.0430000e-02
  -4.2800000e-03
  -2.9910000e-02
  -9.3500000e-03
   3.5400000e-03
  -2.4070000e-02
  -3.0520000e-02
  -2.1030000e-02
  -1.4010000e-02
   1.8920000e-02
   1.8970000e-02
   3.3480000e-02
   4.6580000e-02
   2.3030000e-02
   7.1600000e-03
  -2.5000000e-03
   1.4500000e-03
  -1.6700000e-02
  -4.6580000e-02
  -3.3180000e-02
  -1.8970000e-02
  -6.3300000e-03
  -1.6830000e-02
   1.7500000e-03
   1.7500000e-03
  -1.4610000e-02
  -6.5300000e-03
  -1.8150000e-02
  -4.9100000e-03
  -2.3140000e-02
  -2.3500000e-02
   2.6680000e-02
  -9.9500000e-03
  -2.4180000e-02
  -1.0340000e-02
  -2.2200000e-03
   2.7970000e-02
   1.8320000e-02
   9.6500000e-03
   7.1300000e-03
   1.1500000e-03
   3.2630000e-02
   3.6850000e-02
   1.3350000e-02
   1.5100000e-03
  -3.4850000e-02
  -3.7920000e-02
  -9.9800000e-03
  -1.4040000e-02
  -1.0720000e-02
  -5.8700000e-03
   1.4420000e-02
   7.2580000e-02
   5.8460000e-02
   9.2400000e-03
  -1.8970000e-02
  -1.5410000e-02
  -2.4950000e-02
  -1.5460000e-02
  -4.9900000e-03
  -1.5660000e-02
  -3.5600000e-03
  -8.6400000e-03
   5.6200000e-03
   2.1030000e-02
  -2.1850000e-02
  -8.8000000e-03
   1.5100000e-03
  -7.2900000e-03
   5.2510000e-02
   2.9260000e-02
  -1.4800000e-03
   3.6200000e-03
  -4.2720000e-02
  -2.1470000e-02
  -1.8070000e-02
  -4.8150000e-02
  -1.7190000e-02
  -1.8860000e-02
  -2.0370000e-02
  -1.1490000e-02
   1.7270000e-02
   3.4330000e-02
   4.0250000e-02
   2.1580000e-02
   1.4370000e-02
   1.8670000e-02
   1.3190000e-02
   1.3430000e-02
   1.6180000e-02
   2.2890000e-02
   1.9690000e-02
   3.0870000e-02
  -6.1700000e-03
  -7.6500000e-03
  -3.4800000e-03
  -4.1260000e-02
  -1.8070000e-02
  -2.1470000e-02
   1.4830000e-02
   4.6530000e-02
   1.9140000e-02
   5.2150000e-02
   1.7380000e-02
  -6.5500000e-03
   4.4990000e-02
   1.1820000e-02
  -1.3400000e-03
   1.7000000e-03
  -1.3680000e-02
   1.3110000e-02
  -1.4010000e-02
  -5.9110000e-02
  -5.8570000e-02
  -8.8120000e-02
  -5.5270000e-02
  -6.5890000e-02
  -9.0180000e-02
   1.2200000e-02
   1.2800000e-02
   2.8300000e-02
   6.8380000e-02
   2.9640000e-02
   5.4100000e-02
   2.8210000e-02
  -9.4300000e-03
   8.5000000e-04
  -8.1700000e-03
  -2.1390000e-02
  -2.8020000e-02
  -3.1940000e-02
  -4.3160000e-02
   6.5300000e-03
   9.9500000e-03
   8.6600000e-03
   3.6360000e-02
   0.0000000e+00
   9.2100000e-03
   6.8110000e-02
   2.5360000e-02
   2.9530000e-02
   2.4980000e-02
  -2.4370000e-02
  -1.5380000e-02
  -4.7430000e-02
  -4.0630000e-02
  -1.5030000e-02
  -1.9000000e-02
   2.2350000e-02
   3.4660000e-02
   6.2380000e-02
   5.6730000e-02
   8.1700000e-03
   8.3600000e-03
  -2.9100000e-03
  -3.4790000e-02
  -2.9420000e-02
  -2.5330000e-02
  -1.2010000e-02
   4.0000000e-02
   2.7940000e-02
   1.8400000e-02
   5.1110000e-02
   1.0390000e-02
  -2.6840000e-02
   2.7170000e-02
   3.5670000e-02
   5.5400000e-03
   1.1950000e-02
  -6.2000000e-03
  -2.5770000e-02
  -1.7960000e-02
  -3.1610000e-02
  -2.5910000e-02
  -1.4120000e-02
  -3.7260000e-02
  -2.3440000e-02
   7.0200000e-03
  -2.1170000e-02
  -1.9850000e-02
   1.4640000e-02
   2.4210000e-02
   1.1240000e-02
  -4.6310000e-02
  -5.1820000e-02
  -1.0390000e-02
  -1.1520000e-02
   5.3700000e-03
   1.8750000e-02
   1.0910000e-02
   2.9780000e-02
   2.3200000e-02
  -9.6000000e-03
   4.9600000e-03
   1.2830000e-02
  -2.1850000e-02
  -9.6800000e-03
   1.8010000e-02
  -6.0000000e-04
   1.4610000e-02
   3.1390000e-02
   1.5190000e-02
  -1.3740000e-02
  -8.2000000e-03
  -8.0600000e-03
   3.8100000e-03
   3.5860000e-02
   5.3700000e-03
  -3.0400000e-03
   2.3310000e-02
  -2.0020000e-02
  -4.0550000e-02
  -3.8140000e-02
  -4.5570000e-02
  -1.1130000e-02
  -4.2500000e-03
   3.2130000e-02
   8.7110000e-02
   4.9110000e-02
   5.3110000e-02
   4.2770000e-02
  -3.6220000e-02
  -1.4780000e-02
  -1.2450000e-02
  -4.5430000e-02
  -2.1100000e-03
  -8.8600000e-03
  -4.0060000e-02
   2.2620000e-02
   2.0590000e-02
   1.5600000e-03
  -4.6300000e-03
  -2.6380000e-02
   9.3500000e-03
  -8.9400000e-03
  -2.1520000e-02
   1.8370000e-02
  -7.0200000e-03
   1.2780000e-02
   1.0470000e-02
  -1.0500000e-02
  -5.8900000e-03
  -2.8050000e-02
  -8.1400000e-03
   6.2000000e-03
   4.1700000e-03
   2.9580000e-02
   4.0170000e-02
   4.3620000e-02
   2.7690000e-02
  -1.0720000e-02
  -1.5410000e-02
   2.0760000e-02
   3.0400000e-03
  -9.2700000e-03
   2.2210000e-02
   3.3590000e-02
   3.6660000e-02
   1.0250000e-02
  -1.0670000e-02
  -1.3570000e-02
  -3.2080000e-02
  -2.8710000e-02
  -5.1160000e-02
  -2.4700000e-02
  -6.9100000e-03
  -1.7900000e-02
   3.3120000e-02
  -1.4480000e-02
  -6.1550000e-02
  -1.7770000e-02
  -3.5200000e-02
  -6.9400000e-03
   2.9640000e-02
   1.0720000e-02
   2.8210000e-02
   3.3010000e-02
  -2.7700000e-03
   1.5440000e-02
   2.6600000e-03
  -4.0330000e-02
  -9.3000000e-04
  -1.7080000e-02
  -2.4020000e-02
   1.2040000e-02
  -2.3690000e-02
   2.8680000e-02
   6.8570000e-02
  -1.8120000e-02
  -2.3720000e-02
   1.6500000e-03
  -9.9000000e-04
   5.2400000e-03
   2.1900000e-03
   6.2200000e-03
   1.3380000e-02
  -1.3700000e-03
   3.0000000e-05
   1.6780000e-02
  -1.2580000e-02
  -5.0200000e-03
  -1.4010000e-02
  -1.6040000e-02
   4.0090000e-02
   8.4200000e-03
   5.3500000e-03
   4.1100000e-02
   5.4800000e-03
   2.3000000e-03
  -1.1500000e-03
  -2.5880000e-02
  -2.4540000e-02
  -4.2910000e-02
   2.0670000e-02
   9.2040000e-02
   3.7540000e-02
   2.7060000e-02
   1.6530000e-02
  -1.0140000e-02
   4.1920000e-02
   1.7960000e-02
  -4.3050000e-02
  -2.0100000e-02
  -1.6670000e-02
  -1.4970000e-02
   5.3700000e-03
  -1.4340000e-02
  -1.5440000e-02
   1.2900000e-03
  -2.7910000e-02
   8.6900000e-03
   2.0670000e-02
  -2.5610000e-02
   2.6650000e-02
  -1.2280000e-02
  -3.4680000e-02
   1.7710000e-02
  -3.2900000e-02
  -4.5270000e-02
  -4.0740000e-02
  -7.5870000e-02
  -3.2350000e-02
  -3.0400000e-03
   4.7400000e-03
   2.0700000e-02
   5.5000000e-04
   1.2940000e-02
   4.3160000e-02
   1.1000000e-04
   2.6600000e-03
   6.6900000e-03
  -2.2810000e-02
   2.4870000e-02
   5.5520000e-02
   3.0490000e-02
   8.0900000e-03
  -9.4000000e-03
   8.6900000e-03
   1.0530000e-02
  -1.2830000e-02
   2.8020000e-02
   2.0210000e-02
  -9.4300000e-03
   3.3150000e-02
   1.0310000e-02
   2.1390000e-02
   3.7860000e-02
  -5.1850000e-02
  -3.1560000e-02
  -3.8300000e-02
  -7.8740000e-02
  -4.1100000e-03
   0.0000000e+00
  -2.3740000e-02
   1.0090000e-02
   5.8900000e-03
   1.6480000e-02
   2.0510000e-02
  -1.1820000e-02
   1.2060000e-02
   6.2500000e-03
  -6.0600000e-03
   2.0540000e-02
   9.2700000e-03
   4.9870000e-02
   5.2510000e-02
  -7.3500000e-03
   2.9580000e-02
   2.3610000e-02
   9.0200000e-03
  -1.1100000e-02
  -2.1520000e-02
  -1.4720000e-02
  -4.9240000e-02
  -1.4920000e-02
  -1.2310000e-02
  -4.3130000e-02
   8.9400000e-03
   8.2000000e-04
  -6.4200000e-03
   2.1060000e-02
   1.5080000e-02
   3.0000000e-02
   2.4870000e-02
   2.3360000e-02
   6.0000000e-04
  -2.6650000e-02
  -2.4540000e-02
  -3.3310000e-02
  -4.1680000e-02
  -2.8190000e-02
  -4.3400000e-02
  -3.6960000e-02
  -9.3000000e-04
  -8.7700000e-03
   1.1130000e-02
   2.3910000e-02
   8.2800000e-03
   4.8230000e-02
   3.0930000e-02
   3.4000000e-03
   1.6890000e-02
  -1.7160000e-02
   9.4000000e-03
   1.2910000e-02
  -3.9560000e-02
  -5.1460000e-02
  -4.4360000e-02
  -2.5000000e-03
   1.9110000e-02
   8.9100000e-03
  -1.1460000e-02
  -1.3380000e-02
   4.0300000e-03
   4.0600000e-03
  -3.2900000e-03
  -1.8600000e-03
   8.4400000e-03
   2.8870000e-02
   5.3520000e-02
   3.8520000e-02
   1.2560000e-02
   1.5270000e-02
  -8.9900000e-03
  -2.6180000e-02
  -5.6810000e-02
  -3.4820000e-02
  -1.4700000e-02
  -3.2740000e-02
   2.0760000e-02
   3.2570000e-02
  -5.5100000e-03
  -1.8600000e-03
   3.5600000e-03
  -3.7300000e-03
   8.4200000e-03
   9.5100000e-03
   2.8540000e-02
   3.0430000e-02
  -7.4300000e-03
   1.6450000e-02
   3.3290000e-02
   1.9380000e-02
   4.2800000e-03
  -3.4790000e-02
  -1.8400000e-02
   8.4200000e-03
  -5.2400000e-03
   2.2780000e-02
   2.0590000e-02
   1.8100000e-03
   3.4490000e-02
  -9.7600000e-03
  -1.6290000e-02
   1.1210000e-02
  -3.7860000e-02
  -1.9930000e-02
   9.2700000e-03
  -1.3980000e-02
   2.0760000e-02
   1.4610000e-02
  -2.7140000e-02
  -2.8190000e-02
  -2.8620000e-02
  -5.1080000e-02
  -2.5720000e-02
  -2.2460000e-02
  -3.7370000e-02
  -7.6500000e-03
   2.8930000e-02
   7.6960000e-02
   3.2600000e-02
   2.7100000e-03
   4.4990000e-02
   1.3000000e-02
   6.0300000e-03
   2.3060000e-02
  -5.5770000e-02
  -5.8670000e-02
  -5.5850000e-02
  -5.8670000e-02
  -5.8400000e-03
   4.0000000e-03
  -8.6900000e-03
   6.7700000e-03
   2.7450000e-02
   3.3970000e-02
   5.1410000e-02
   6.8220000e-02
   4.4690000e-02
   2.1140000e-02
  -1.5680000e-02
  -3.4740000e-02
  -1.0580000e-02
  -1.8480000e-02
  -3.4380000e-02
  -3.1230000e-02
  -5.9030000e-02
  -1.4010000e-02
   2.1910000e-02
  -1.1240000e-02
   6.3900000e-03
  -1.0360000e-02
  -2.0540000e-02
   3.7400000e-02
   4.6120000e-02
   2.6130000e-02
   4.9130000e-02
   6.3170000e-02
   2.5880000e-02
   1.0010000e-02
   6.4700000e-03
  -2.7990000e-02
  -3.6520000e-02
  -4.5270000e-02
  -3.8710000e-02
   1.1980000e-02
   6.8500000e-03
  -2.2040000e-02
  -1.6150000e-02
  -1.7270000e-02
  -6.6000000e-04
  -7.7300000e-03
   1.7160000e-02
   4.0000000e-02
   6.0000000e-03
   3.8100000e-03
   2.9750000e-02
   3.6440000e-02
   1.8860000e-02
  -7.1000000e-03
  -1.2090000e-02
  -4.0600000e-03
  -4.3810000e-02
  -4.5130000e-02
  -4.4390000e-02
  -3.2440000e-02
  -1.0250000e-02
  -1.2800000e-02
   3.7230000e-02
   4.2170000e-02
   1.5710000e-02
   2.9470000e-02
   1.0170000e-02
  -2.4590000e-02
  -2.6130000e-02
   1.0200000e-02
   4.0550000e-02
  -9.7100000e-03
  -2.4590000e-02
   1.2600000e-03
  -3.3610000e-02
  -3.6200000e-03
   2.1930000e-02
  -7.5400000e-03
   2.4020000e-02
  -1.2690000e-02
  -1.6530000e-02
   1.4370000e-02
  -1.7330000e-02
  -3.5180000e-02
  -3.6030000e-02
  -5.6500000e-03
   2.1910000e-02
  -9.3200000e-03
   4.3000000e-03
   6.0400000e-02
   2.1280000e-02
   9.5100000e-03
   8.0300000e-03
  -3.1170000e-02
  -7.3200000e-03
  -1.7680000e-02
  -3.7210000e-02
   3.9500000e-03
  -3.3480000e-02
  -3.4600000e-02
   1.0450000e-02
   1.4810000e-02
   2.3310000e-02
   8.6600000e-03
   1.8670000e-02
   4.2800000e-03
   8.5500000e-03
   2.5000000e-03
  -5.7900000e-03
   8.7500000e-03
   5.1300000e-03
   1.1460000e-02
   2.3440000e-02
   8.5300000e-03
  -2.4810000e-02
  -2.6510000e-02
  -4.4100000e-03
   2.2290000e-02
   2.4070000e-02
   1.9580000e-02
   5.3630000e-02
   5.4010000e-02
   3.7700000e-02
   2.3910000e-02
  -4.0170000e-02
  -7.2850000e-02
  -5.4120000e-02
  -5.7630000e-02
  -2.0810000e-02
   5.4800000e-03
   3.4800000e-03
   1.4150000e-02
   2.9640000e-02
   3.4410000e-02
   3.2460000e-02
   5.1710000e-02
  -2.3600000e-03
  -6.3100000e-03
   1.4390000e-02
  -5.1220000e-02
  -3.6270000e-02
  -4.8200000e-02
  -2.8410000e-02
   9.9000000e-04
  -5.5110000e-02
  -3.0710000e-02
  -4.1040000e-02
  -3.8770000e-02
   4.3490000e-02
   3.0460000e-02
   3.0300000e-02
   6.0810000e-02
  -5.1300000e-03
  -8.4700000e-03
   4.3700000e-02
   7.2400000e-03
  -2.9670000e-02
  -3.3420000e-02
  -4.5290000e-02
  -9.7900000e-03
   1.8370000e-02
  -9.5400000e-03
  -6.9900000e-03
  -2.3630000e-02
  -2.7830000e-02
  -6.3600000e-03
   9.9300000e-03
   2.3000000e-02
  -8.0100000e-03
   8.0600000e-03
   5.8370000e-02
   1.8340000e-02
   8.2000000e-03
   1.3520000e-02
   9.3800000e-03
   2.5390000e-02
   1.5030000e-02
  -8.2500000e-03
   1.1760000e-02
   5.8000000e-04
  -1.8970000e-02
  -2.6760000e-02
  -5.3770000e-02
  -6.1880000e-02
  -6.8760000e-02
  -3.4380000e-02
   3.4080000e-02
   5.8650000e-02
   6.5420000e-02
   4.2250000e-02
   4.8310000e-02
   2.9970000e-02
   3.6930000e-02
   4.6120000e-02
  -2.8100000e-02
  -1.6810000e-02
   3.3500000e-03
  -3.0110000e-02
  -3.1500000e-03
  -1.7710000e-02
  -7.0000000e-02
  -9.9500000e-03
  -1.2940000e-02
  -5.4070000e-02
  -3.2490000e-02
  -3.8220000e-02
   1.0120000e-02
   7.2300000e-02
   8.8200000e-02
   1.0350000e-01
   1.0984000e-01
   3.8600000e-02
  -7.9000000e-03
  -2.6240000e-02
  -9.8210000e-02
  -1.0038000e-01
  -4.7820000e-02
  -6.2620000e-02
   7.5700000e-03
   4.2170000e-02
   5.7900000e-03
   7.2140000e-02
   1.5130000e-02
  -4.5130000e-02
   9.9500000e-03
  -3.4080000e-02
  -2.8500000e-03
   4.2390000e-02
   3.0870000e-02
   3.4900000e-02
   1.4750000e-02
   1.0200000e-02
   2.1280000e-02
  -4.3020000e-02
  -6.1220000e-02
  -4.7540000e-02
  -4.8120000e-02
  -1.7790000e-02
  -1.3740000e-02
   1.3020000e-02
   5.2070000e-02
   1.5900000e-03
  -1.3000000e-02
  -1.4780000e-02
  -5.3700000e-03
   1.4390000e-02
  -3.0490000e-02
  -1.0530000e-02
   4.5320000e-02
   2.2650000e-02
   2.2260000e-02
   1.0010000e-02
  -1.5770000e-02
  -1.7680000e-02
   1.0640000e-02
  -3.8550000e-02
  -5.4810000e-02
  -9.5700000e-03
   9.6000000e-04
   3.7290000e-02
   3.9450000e-02
  -4.5500000e-03
   4.7700000e-03
   4.4400000e-03
  -1.9660000e-02
   1.8340000e-02
   4.2140000e-02
   2.9670000e-02
   1.9960000e-02
   2.8210000e-02
   8.5800000e-03
  -3.2570000e-02
  -4.2220000e-02
  -3.6190000e-02
  -4.6610000e-02
  -6.1700000e-03
   1.1680000e-02
   8.0300000e-03
   3.3310000e-02
   2.1360000e-02
   9.9500000e-03
   2.2700000e-02
   9.3000000e-04
   1.0830000e-02
   7.2100000e-03
  -3.4600000e-02
   1.4480000e-02
   4.1920000e-02
   9.4300000e-03
   4.2330000e-02
   2.0290000e-02
  -3.4850000e-02
  -2.0620000e-02
  -4.7300000e-02
  -3.3810000e-02
  -9.0200000e-03
  -3.0820000e-02
   6.6000000e-04
   5.1630000e-02
   3.2410000e-02
   1.7550000e-02
   2.5500000e-02
   2.6210000e-02
   5.8900000e-03
  -3.2080000e-02
  -1.4480000e-02
  -7.9200000e-03
  -4.5050000e-02
  -3.8190000e-02
  -2.1220000e-02
  -1.0120000e-02
  -1.9910000e-02
  -1.8620000e-02
  -1.8290000e-02
  -6.8000000e-03
   1.7000000e-03
   2.4290000e-02
   3.2270000e-02
   2.8320000e-02
   3.1010000e-02
  -1.7710000e-02
  -3.3200000e-02
  -8.4200000e-03
  -3.0160000e-02
  -3.8190000e-02
   8.0100000e-03
  -2.5580000e-02
  -4.1730000e-02
   3.0430000e-02
  -1.8400000e-03
  -1.2860000e-02
   1.7710000e-02
  -1.7440000e-02
   2.4270000e-02
   5.6120000e-02
   1.5600000e-02
   2.7860000e-02
   3.0050000e-02
   2.0450000e-02
   1.4340000e-02
  -3.5150000e-02
  -1.4560000e-02
   3.0700000e-03
  -1.8150000e-02
   8.0100000e-03
   7.9800000e-03
   2.6000000e-03
   9.6500000e-03
  -1.2200000e-02
  -1.5190000e-02
   3.2900000e-03
  -5.7600000e-03
   3.9500000e-03
   7.8700000e-03
  -5.2400000e-03
   2.8730000e-02
   9.7600000e-03
   1.1710000e-02
   1.5900000e-02
  -2.3660000e-02
   1.4970000e-02
   2.6650000e-02
  -1.4090000e-02
  -7.5400000e-03
  -1.1490000e-02
  -1.2420000e-02
   1.7000000e-02
  -4.9900000e-03
  -1.7770000e-02
  -1.1600000e-02
  -3.9650000e-02
  -1.2120000e-02
   4.0660000e-02
   2.0950000e-02
   4.6670000e-02
   5.0610000e-02
  -5.4800000e-03
   2.9280000e-02
  -2.5200000e-03
  -8.2060000e-02
  -6.3830000e-02
  -4.9760000e-02
  -4.9020000e-02
  -2.3250000e-02
  -7.0500000e-03
   2.6730000e-02
   3.1060000e-02
   1.3930000e-02
   2.4870000e-02
   3.8190000e-02
   4.0900000e-03
  -1.3490000e-02
   2.8620000e-02
  -3.1000000e-03
  -7.6800000e-03
  -9.6800000e-03
  -1.0690000e-02
  -1.2100000e-03
  -4.2220000e-02
  -3.1610000e-02
  -2.0730000e-02
  -1.2120000e-02
  -2.7580000e-02
  -2.2430000e-02
   5.4450000e-02
   4.0500000e-02
  -8.2300000e-03
   1.1320000e-02
   1.9700000e-03
  -9.9500000e-03
  -3.0000000e-05
  -6.8500000e-03
  -2.4650000e-02
  -1.0280000e-02
  -1.8100000e-02
  -1.2600000e-03
   1.2340000e-02
  -1.0860000e-02
   3.1640000e-02
   2.0760000e-02
  -2.0400000e-02
  -1.9140000e-02
  -2.4510000e-02
   2.4730000e-02
   1.4810000e-02
  -8.5000000e-04
   2.7060000e-02
   2.8790000e-02
   2.3910000e-02
  -7.8400000e-03
   9.2900000e-03
   2.9230000e-02
  -6.9000000e-04
  -5.8400000e-03
   6.6400000e-03
   1.3330000e-02
   6.7200000e-03
  -2.5800000e-03
  -2.5500000e-03
   9.8700000e-03
   2.8800000e-03
  -9.1600000e-03
   5.7000000e-03
  -2.6540000e-02
  -2.8600000e-02
   6.9600000e-03
   2.6210000e-02
   4.8090000e-02
   2.0340000e-02
  -1.2750000e-02
   1.6150000e-02
   9.6000000e-04
  -3.8600000e-02
  -3.5860000e-02
  -2.2130000e-02
  -9.3200000e-03
   8.0000000e-05
   1.5050000e-02
  -4.9900000e-03
  -1.1930000e-02
   5.7300000e-03
   7.4000000e-04
  -1.0100000e-03
  -1.4000000e-03
  -1.3680000e-02
  -5.9800000e-03
   7.3800000e-03
  -1.0750000e-02
  -4.3320000e-02
  -1.4940000e-02
  -5.7000000e-03
  -4.2110000e-02
   1.0400000e-03
   1.2640000e-02
  -8.0900000e-03
  -3.1300000e-03
  -1.6040000e-02
   8.0000000e-05
   2.1550000e-02
  -9.7600000e-03
  -1.7600000e-02
   3.9800000e-03
   3.0000000e-04
  -6.5500000e-03
   2.4240000e-02
   1.1020000e-02
  -6.6000000e-04
   2.1390000e-02
   2.2130000e-02
   1.5000000e-02
  -2.6400000e-02
  -2.0840000e-02
  -5.5100000e-03
   3.0490000e-02
   2.2800000e-03
  -3.5890000e-02
   2.8200000e-03
   8.9900000e-03
  -1.7800000e-03
   1.1050000e-02
   8.5300000e-03
  -4.0000000e-03
   1.0100000e-03
   3.6880000e-02
   5.2040000e-02
   2.6320000e-02
   1.0170000e-02
  -7.5700000e-03
  -1.7080000e-02
  -1.1080000e-02
  -7.7370000e-02
  -7.1920000e-02
  -9.0500000e-03
  -4.1480000e-02
   8.6600000e-03
   6.1800000e-02
   1.8970000e-02
   1.4450000e-02
   1.9580000e-02
   4.0800000e-02
   5.8890000e-02
   1.6590000e-02
   4.0300000e-03
  -9.4600000e-03
  -1.1460000e-02
   1.4700000e-02
  -1.2120000e-02
  -4.9820000e-02
  -4.2640000e-02
  -4.6560000e-02
  -2.2040000e-02
  -1.1980000e-02
  -3.7120000e-02
  -2.9500000e-02
   3.6200000e-03
   8.9700000e-03
  -2.1500000e-02
   1.4890000e-02
   3.2520000e-02
   4.1570000e-02
   2.6570000e-02
   1.5030000e-02
   7.0440000e-02
   4.2280000e-02
   3.4880000e-02
   3.1610000e-02
  -3.2870000e-02
  -5.6620000e-02
  -8.1760000e-02
  -6.3660000e-02
  -3.5530000e-02
  -5.6730000e-02
  -2.3830000e-02
   1.4090000e-02
   2.8510000e-02
   3.8440000e-02
   2.9120000e-02
   2.8760000e-02
   2.0560000e-02
  -2.4590000e-02
   1.6750000e-02
   2.9940000e-02
   1.3400000e-03
  -2.0760000e-02
  -4.2940000e-02
   1.4800000e-03
  -1.2580000e-02
  -7.3120000e-02
  -3.7180000e-02
  -5.9030000e-02
  -4.1920000e-02
   3.7480000e-02
   3.7340000e-02
   4.2660000e-02
   3.2760000e-02
   1.9170000e-02
   6.2870000e-02
   4.7600000e-02
  -1.4940000e-02
  -3.4380000e-02
  -2.2430000e-02
   7.2400000e-03
   9.8200000e-03
  -1.2670000e-02
  -3.9500000e-03
   2.3250000e-02
  -2.1630000e-02
  -2.4620000e-02
  -2.7450000e-02
  -3.0110000e-02
  -4.4910000e-02
  -3.8300000e-02
  -8.5300000e-03
   3.5010000e-02
   5.9800000e-02
   1.4670000e-02
   2.3140000e-02
   3.0410000e-02
   2.5310000e-02
   4.0960000e-02
  -1.0360000e-02
  -6.2800000e-03
   5.4300000e-03
  -1.3200000e-03
   1.8900000e-03
  -3.0160000e-02
  -5.5410000e-02
  -5.6370000e-02
  -1.0610000e-02
   6.4400000e-03
  -1.8180000e-02
   4.2740000e-02
   4.6500000e-02
   4.1040000e-02
   5.5440000e-02
   6.5500000e-03
   1.4000000e-04
   4.7400000e-03
  -1.8010000e-02
  -2.0430000e-02
  -3.0540000e-02
  -4.9020000e-02
  -1.4230000e-02
  -1.1600000e-02
  -4.0880000e-02
  -1.5820000e-02
  -2.8100000e-02
  -8.2800000e-03
   2.5750000e-02
   2.9900000e-03
   1.1000000e-03
   1.7880000e-02
   3.3400000e-02
   3.4770000e-02
   1.0970000e-02
  -8.0000000e-05
   1.6530000e-02
  -1.4420000e-02
  -4.0170000e-02
  -1.1840000e-02
  -3.0210000e-02
  -2.6760000e-02
  -4.2030000e-02
  -3.1610000e-02
   3.7430000e-02
  -2.2800000e-03
   9.5700000e-03
   1.3350000e-02
  -7.4900000e-03
   1.6560000e-02
   2.7120000e-02
   4.8010000e-02
   3.0760000e-02
  -1.8260000e-02
  -5.0720000e-02
  -2.9670000e-02
  -2.1250000e-02
  -4.8830000e-02
  -4.1590000e-02
  -1.4010000e-02
   5.3200000e-03
   4.6090000e-02
   1.9660000e-02
   7.9500000e-03
   3.5290000e-02
  -4.7700000e-03
   3.2400000e-03
   3.9350000e-02
   1.2420000e-02
   3.9870000e-02
   5.2200000e-02
  -1.2100000e-03
   9.6800000e-03
  -1.6940000e-02
  -3.4790000e-02
