# Supplementary material for: A Novel Classification Method for Flutter Signals Based on the CNN and STFT
Source: Hindawi journal article supplement (doi:10.1155/2019/9375437), 2019-04-09
Supplement: f1 [file 9375437.f1.zip › 00_25_z15.0_30channel.txt]

   9.3200000e-03
   1.9360000e-02
  -4.6420000e-02
  -5.5190000e-02
  -3.7600000e-03
  -1.6590000e-02
  -3.5640000e-02
   9.7300000e-03
   2.9900000e-03
   1.4800000e-03
   2.2980000e-02
   1.3460000e-02
   1.0610000e-02
   4.4660000e-02
   2.8410000e-02
  -1.3160000e-02
  -9.6500000e-03
   7.9000000e-03
   1.7500000e-03
   1.6970000e-02
   3.4140000e-02
   2.8240000e-02
   2.5910000e-02
  -2.4900000e-02
   6.8800000e-03
  -4.8800000e-03
  -5.5820000e-02
  -5.6260000e-02
  -4.5160000e-02
  -2.3850000e-02
  -1.3270000e-02
   3.8900000e-03
   5.0530000e-02
   1.1984000e-01
   9.0400000e-02
   5.2640000e-02
   6.7280000e-02
   2.5610000e-02
  -3.9780000e-02
  -8.9770000e-02
  -1.0597000e-01
  -7.2900000e-02
  -6.2650000e-02
  -5.1380000e-02
   1.2310000e-02
   1.1472000e-01
   8.6560000e-02
   6.1770000e-02
   1.0367000e-01
   9.1140000e-02
   5.4150000e-02
  -2.1690000e-02
  -3.3920000e-02
  -4.1920000e-02
  -5.5440000e-02
  -6.7610000e-02
  -3.2050000e-02
  -1.5220000e-02
   2.0300000e-03
   9.1600000e-02
   1.2185000e-01
   1.4013000e-01
   1.1461000e-01
   5.4670000e-02
   2.4700000e-02
  -7.5870000e-02
  -1.4331000e-01
  -1.1787000e-01
  -8.8480000e-02
  -6.8490000e-02
  -1.7490000e-02
   7.5260000e-02
   8.4010000e-02
   8.0030000e-02
   9.9580000e-02
   9.9120000e-02
   9.7830000e-02
   3.7590000e-02
   1.8530000e-02
  -1.5000000e-02
  -5.6700000e-02
  -8.0800000e-02
  -1.1845000e-01
  -9.5220000e-02
  -6.1690000e-02
  -5.2480000e-02
   6.6400000e-03
   6.0700000e-02
   5.1270000e-02
   6.3830000e-02
   6.4600000e-02
   1.2500000e-02
  -2.7400000e-03
   1.1540000e-02
  -1.4830000e-02
   1.8150000e-02
  -5.5100000e-03
  -2.0760000e-02
   1.4860000e-02
  -9.9800000e-03
  -1.3330000e-02
  -1.4310000e-02
  -2.5940000e-02
  -1.0690000e-02
   8.6400000e-03
   3.5950000e-02
   4.9870000e-02
   3.8770000e-02
   3.3700000e-02
   1.6290000e-02
  -4.9000000e-04
  -4.4000000e-04
   3.0080000e-02
   1.1080000e-02
   3.1170000e-02
   3.5560000e-02
  -1.5630000e-02
  -5.8100000e-03
  -1.0450000e-02
  -3.9180000e-02
  -2.2000000e-04
   3.0960000e-02
   7.6500000e-03
   3.7290000e-02
   4.0110000e-02
  -1.8730000e-02
  -9.8400000e-03
  -8.4700000e-03
  -2.2260000e-02
   3.3310000e-02
   4.8280000e-02
   4.1070000e-02
   4.6780000e-02
   6.6900000e-02
   1.5660000e-02
  -9.3200000e-03
   1.7300000e-02
  -1.8320000e-02
  -2.8080000e-02
  -2.7580000e-02
  -5.3520000e-02
  -3.9480000e-02
  -2.2780000e-02
  -1.4310000e-02
  -8.0000000e-04
   5.5110000e-02
   5.3990000e-02
   4.0580000e-02
   9.0180000e-02
   8.3520000e-02
  -9.6200000e-03
  -4.9980000e-02
  -2.4680000e-02
  -6.4430000e-02
  -6.1310000e-02
  -3.2900000e-03
   3.2130000e-02
   8.5130000e-02
   9.9140000e-02
  -1.8840000e-02
  -5.5700000e-03
  -1.4500000e-03
  -1.0424000e-01
  -1.1107000e-01
   4.4610000e-02
   7.3370000e-02
   3.0050000e-02
   7.3810000e-02
   6.0730000e-02
   2.2980000e-02
  -4.8610000e-02
  -5.9550000e-02
   3.4800000e-03
   5.0700000e-03
   2.8680000e-02
   5.0180000e-02
   4.4420000e-02
   6.5280000e-02
  -8.0300000e-03
  -5.3850000e-02
  -1.9630000e-02
   6.2500000e-03
  -3.0900000e-02
  -1.8730000e-02
   7.1510000e-02
   4.8970000e-02
   4.9000000e-04
  -4.7570000e-02
  -4.8280000e-02
  -2.4100000e-03
  -3.1970000e-02
  -1.1800000e-03
   5.4400000e-02
   5.9250000e-02
   2.4950000e-02
  -2.2620000e-02
   7.5900000e-03
   1.6040000e-02
  -2.9150000e-02
   6.8300000e-03
   3.0380000e-02
   2.4650000e-02
  -2.5660000e-02
  -3.1530000e-02
  -4.0800000e-02
  -7.0460000e-02
  -5.5330000e-02
  -1.0090000e-02
   8.1130000e-02
   1.3605000e-01
   1.4197000e-01
   1.7731000e-01
   1.4666000e-01
   5.3270000e-02
  -1.7110000e-02
  -7.3810000e-02
  -1.2333000e-01
  -1.3183000e-01
  -1.3142000e-01
  -7.5840000e-02
   1.0500000e-02
   5.1050000e-02
   7.9050000e-02
   1.0597000e-01
   1.1376000e-01
   9.7250000e-02
   6.2380000e-02
   4.3540000e-02
   2.1030000e-02
  -5.0500000e-02
  -7.8280000e-02
  -6.7530000e-02
  -6.2620000e-02
  -7.0790000e-02
  -4.3380000e-02
  -1.3130000e-02
   3.2790000e-02
   6.0210000e-02
   5.3080000e-02
   6.8900000e-02
   7.2190000e-02
   2.9670000e-02
  -1.3460000e-02
  -3.8410000e-02
  -6.5360000e-02
  -5.4670000e-02
  -5.3270000e-02
  -4.6420000e-02
  -1.9880000e-02
  -2.5200000e-03
   3.5310000e-02
   3.6960000e-02
   2.8410000e-02
   5.2370000e-02
   2.3880000e-02
   1.1870000e-02
   1.0940000e-02
   3.8400000e-03
   2.2070000e-02
   2.5500000e-03
   6.0900000e-03
   6.5500000e-03
  -1.0910000e-02
  -1.3110000e-02
   1.0610000e-02
   1.8100000e-03
   1.1730000e-02
   3.3970000e-02
   1.4700000e-02
   2.7530000e-02
   1.1410000e-02
  -7.7600000e-03
   5.4750000e-02
   8.4690000e-02
   2.7970000e-02
   5.7300000e-02
   5.0120000e-02
  -2.8240000e-02
  -4.5950000e-02
  -6.3690000e-02
  -1.1321000e-01
  -6.3830000e-02
  -4.2200000e-03
   2.3200000e-02
   9.0070000e-02
   1.6317000e-01
   1.3923000e-01
   4.7270000e-02
  -1.0470000e-02
  -3.3590000e-02
  -7.6280000e-02
  -1.2845000e-01
  -5.7550000e-02
   1.8900000e-03
   1.9360000e-02
   5.2180000e-02
   5.8100000e-02
   3.6880000e-02
   1.5600000e-02
  -2.8800000e-03
  -8.5000000e-03
   3.9400000e-02
   2.4810000e-02
   4.0900000e-03
   1.7270000e-02
  -1.6730000e-02
  -6.9070000e-02
  -7.0770000e-02
  -6.7090000e-02
  -3.0600000e-02
   1.3300000e-02
   6.0430000e-02
   9.0640000e-02
   9.7030000e-02
   6.1610000e-02
   3.6000000e-02
   8.2000000e-04
  -2.1300000e-02
  -1.4370000e-02
  -5.4070000e-02
  -1.1000000e-03
   4.0660000e-02
  -1.1820000e-02
   1.0990000e-02
   1.7740000e-02
  -2.5200000e-02
  -1.3900000e-02
   2.3770000e-02
   1.8400000e-02
   2.4700000e-02
   4.2830000e-02
   1.0670000e-02
   6.3600000e-03
  -3.2130000e-02
  -4.1430000e-02
   7.5700000e-03
  -1.8100000e-03
   1.4750000e-02
   5.8460000e-02
   4.0550000e-02
   3.2350000e-02
   1.2060000e-02
  -4.3900000e-03
  -2.9060000e-02
  -4.6670000e-02
  -4.0720000e-02
  -2.5720000e-02
  -1.7550000e-02
   2.8500000e-03
   3.1940000e-02
   1.5770000e-02
   3.3310000e-02
   4.3160000e-02
   1.2720000e-02
   6.5120000e-02
   4.5080000e-02
  -1.0890000e-02
   9.0200000e-03
  -6.4400000e-03
  -1.8400000e-02
  -2.2130000e-02
  -5.4600000e-03
  -2.5500000e-03
   1.5570000e-02
   2.9780000e-02
   6.4700000e-03
   3.5260000e-02
   4.0470000e-02
   1.7520000e-02
   3.0240000e-02
   5.3410000e-02
   4.0280000e-02
  -1.5190000e-02
   5.4800000e-03
   3.2130000e-02
  -1.0780000e-02
   7.0700000e-03
   4.7980000e-02
   2.6100000e-02
   3.3150000e-02
   1.9550000e-02
  -1.3630000e-02
  -1.5900000e-03
  -4.2030000e-02
  -4.4550000e-02
  -8.5000000e-04
  -1.0450000e-02
  -4.4690000e-02
   1.8010000e-02
   2.2070000e-02
  -1.1950000e-02
   1.0250000e-02
  -1.5300000e-02
   3.2410000e-02
   5.4400000e-02
  -1.1950000e-02
   8.8800000e-03
   4.3730000e-02
   1.5600000e-03
  -5.4560000e-02
  -5.2590000e-02
  -2.8980000e-02
  -9.9500000e-03
  -5.0010000e-02
  -1.3190000e-02
   6.1090000e-02
   1.0060000e-02
   2.9560000e-02
   6.5720000e-02
   3.6630000e-02
   3.9510000e-02
   2.1700000e-03
   6.3000000e-04
   2.9940000e-02
  -1.5490000e-02
  -7.9730000e-02
  -5.5820000e-02
  -2.1360000e-02
  -3.9920000e-02
   1.1350000e-02
   6.1500000e-02
   1.0394000e-01
   1.0391000e-01
   1.2150000e-02
   7.4900000e-03
  -2.5200000e-03
  -4.6450000e-02
  -2.2810000e-02
   2.0920000e-02
   3.4770000e-02
   5.1330000e-02
   4.7270000e-02
   2.5280000e-02
   5.0230000e-02
   2.0590000e-02
  -1.8590000e-02
   2.5000000e-03
   2.2500000e-03
  -8.9700000e-03
  -1.3870000e-02
  -2.0510000e-02
   2.0070000e-02
   4.7600000e-02
   3.8400000e-03
   4.2990000e-02
   7.9380000e-02
   4.7410000e-02
   5.6210000e-02
   3.9500000e-03
  -4.3510000e-02
  -3.2270000e-02
  -4.6340000e-02
  -5.2970000e-02
  -3.9650000e-02
  -4.2500000e-03
   3.2100000e-03
  -7.7000000e-03
  -8.1400000e-03
   3.3090000e-02
   1.6890000e-02
   1.0140000e-02
   4.8170000e-02
   6.4790000e-02
   4.0360000e-02
   6.0270000e-02
   2.8680000e-02
  -1.5460000e-02
   2.0600000e-03
  -6.0460000e-02
  -7.7130000e-02
  -4.9760000e-02
  -7.2000000e-02
  -2.4920000e-02
   6.2650000e-02
   2.6730000e-02
   5.9800000e-02
   1.1008000e-01
   6.9940000e-02
   3.0930000e-02
   3.5640000e-02
   1.2090000e-02
  -3.0000000e-04
  -2.0560000e-02
  -5.4810000e-02
  -2.4070000e-02
  -3.8740000e-02
  -6.5580000e-02
  -9.1000000e-03
   2.5250000e-02
   2.7610000e-02
   4.6470000e-02
   4.1430000e-02
   4.6040000e-02
   5.1350000e-02
  -1.6010000e-02
  -4.5320000e-02
   6.7200000e-03
  -1.8510000e-02
  -3.5620000e-02
   2.8200000e-03
   3.7150000e-02
   2.9470000e-02
   5.8700000e-03
   1.6750000e-02
   5.6560000e-02
   4.7730000e-02
   2.6050000e-02
   2.8900000e-02
   1.5630000e-02
  -3.4050000e-02
  -5.1520000e-02
  -6.7120000e-02
  -5.9770000e-02
  -6.3100000e-03
   3.8900000e-03
   3.0760000e-02
   8.3600000e-02
   9.1550000e-02
   7.2930000e-02
   4.9820000e-02
   2.7640000e-02
   8.5000000e-03
  -3.3500000e-03
  -1.6700000e-02
  -1.8860000e-02
  -2.5910000e-02
  -1.8890000e-02
  -1.9030000e-02
  -4.7710000e-02
   1.7550000e-02
   1.3820000e-02
   6.4700000e-03
   6.6020000e-02
   7.2630000e-02
   6.4430000e-02
   6.7010000e-02
   4.8060000e-02
  -4.3600000e-03
   3.2330000e-02
   2.9280000e-02
  -1.4120000e-02
  -2.3000000e-03
  -6.4840000e-02
  -9.6950000e-02
  -8.8780000e-02
  -6.7590000e-02
  -3.6080000e-02
   6.8800000e-03
   7.2710000e-02
   9.7530000e-02
   1.0649000e-01
   8.2750000e-02
   4.4500000e-02
   2.4020000e-02
  -3.5840000e-02
  -3.8390000e-02
  -1.1430000e-02
  -1.3930000e-02
  -1.0530000e-02
  -4.7210000e-02
  -4.1840000e-02
  -3.4270000e-02
  -4.3570000e-02
  -3.1560000e-02
   2.3850000e-02
   3.1090000e-02
   3.5400000e-03
   6.2510000e-02
   4.5840000e-02
   1.7900000e-02
   4.1950000e-02
   4.1980000e-02
   5.2730000e-02
   5.8070000e-02
   6.1330000e-02
   4.3730000e-02
  -2.1580000e-02
  -7.8990000e-02
  -8.0690000e-02
  -9.1250000e-02
  -8.6590000e-02
  -3.3400000e-02
   3.3830000e-02
   9.6290000e-02
   1.0498000e-01
   6.8600000e-02
   9.7860000e-02
   5.8920000e-02
  -2.8410000e-02
  -3.4300000e-03
   2.0150000e-02
   2.5770000e-02
   2.3220000e-02
  -3.7600000e-03
  -2.5000000e-03
   7.5900000e-03
  -7.7760000e-02
  -1.0485000e-01
   1.5000000e-02
   3.4630000e-02
   6.6100000e-03
   5.6810000e-02
   8.8530000e-02
   3.6140000e-02
  -1.1200000e-03
  -1.6340000e-02
  -7.9500000e-03
   1.3020000e-02
  -3.7600000e-03
   2.0430000e-02
   4.7900000e-02
   3.7590000e-02
  -5.5400000e-03
  -5.1490000e-02
  -6.8500000e-03
  -2.0070000e-02
  -6.4020000e-02
   1.8320000e-02
   6.2490000e-02
  -1.9470000e-02
  -2.3610000e-02
   2.4480000e-02
   1.1930000e-02
   1.4420000e-02
  -2.9100000e-03
   2.5610000e-02
   5.0230000e-02
   1.6810000e-02
  -1.9660000e-02
   7.7300000e-03
   1.5980000e-02
  -1.5410000e-02
  -1.2560000e-02
   2.1960000e-02
   5.1460000e-02
  -5.4000000e-03
  -3.2050000e-02
   9.0800000e-03
  -2.1900000e-03
  -6.1440000e-02
  -3.4850000e-02
   5.1800000e-03
  -9.1000000e-03
   4.3590000e-02
   6.4900000e-02
   8.2060000e-02
   9.6650000e-02
   4.7430000e-02
  -6.1700000e-03
   1.1540000e-02
  -1.4590000e-02
  -4.1350000e-02
  -4.3920000e-02
  -3.6470000e-02
  -4.7540000e-02
  -2.1300000e-02
  -2.5010000e-02
  -3.6700000e-03
   1.1870000e-02
   3.3530000e-02
   8.3520000e-02
   5.4260000e-02
   3.7730000e-02
   6.8270000e-02
   4.4550000e-02
  -8.8000000e-04
   1.9380000e-02
  -4.0910000e-02
  -5.5410000e-02
  -5.6210000e-02
  -4.4250000e-02
  -1.1000000e-03
   3.1940000e-02
   1.4230000e-02
   6.1960000e-02
   4.2470000e-02
   1.1000000e-03
   3.0410000e-02
   8.0900000e-03
  -1.1820000e-02
   2.5120000e-02
   4.7210000e-02
   3.5620000e-02
   4.5050000e-02
  -4.1400000e-03
  -2.6070000e-02
   3.0000000e-05
  -2.1410000e-02
  -3.8300000e-02
  -2.3630000e-02
  -1.5660000e-02
   1.2860000e-02
  -1.0640000e-02
   3.1590000e-02
   7.9490000e-02
   5.2920000e-02
   4.8260000e-02
   5.2230000e-02
   4.4440000e-02
   1.7740000e-02
  -3.9920000e-02
  -3.1720000e-02
  -1.2780000e-02
  -7.0250000e-02
  -9.2480000e-02
  -5.1680000e-02
  -3.1750000e-02
  -3.3070000e-02
  -2.7140000e-02
  -1.3900000e-02
   8.4860000e-02
   9.7880000e-02
   5.5520000e-02
   7.4580000e-02
   7.1120000e-02
   2.2920000e-02
  -7.1300000e-03
  -5.2600000e-03
  -1.9300000e-02
  -3.3940000e-02
  -6.0700000e-02
  -7.1810000e-02
  -5.8670000e-02
  -6.9120000e-02
  -4.3100000e-02
   1.9910000e-02
   6.5830000e-02
   9.7580000e-02
   1.1329000e-01
   8.5350000e-02
   7.1150000e-02
   5.7600000e-03
  -5.9330000e-02
  -5.7110000e-02
  -5.5080000e-02
  -6.1880000e-02
  -1.2860000e-02
   4.2250000e-02
   4.4310000e-02
   4.2880000e-02
   3.2740000e-02
   1.8620000e-02
   4.3270000e-02
   2.4370000e-02
  -1.7360000e-02
   3.2820000e-02
   1.9190000e-02
  -1.9220000e-02
   1.2610000e-02
   4.6800000e-02
   2.8430000e-02
   1.5460000e-02
   4.3430000e-02
   2.8950000e-02
   1.8920000e-02
  -4.9900000e-03
  -3.7650000e-02
  -5.0780000e-02
  -6.6850000e-02
  -6.0130000e-02
  -3.4850000e-02
   1.0390000e-02
   8.3050000e-02
   8.9160000e-02
   9.5550000e-02
   1.2571000e-01
   5.5850000e-02
  -1.7520000e-02
  -7.4690000e-02
  -1.0641000e-01
  -1.2135000e-01
  -1.0770000e-01
  -5.9200000e-02
   2.3910000e-02
   8.3410000e-02
   5.8920000e-02
   6.5970000e-02
   7.8390000e-02
   1.9520000e-02
   7.5700000e-03
   4.4250000e-02
   5.8370000e-02
   3.4110000e-02
  -1.1460000e-02
  -1.6750000e-02
  -1.9490000e-02
  -7.0110000e-02
  -9.7860000e-02
  -2.5220000e-02
   1.5660000e-02
  -7.1600000e-03
   2.9500000e-02
   2.5220000e-02
   2.6840000e-02
   1.4810000e-02
  -9.5700000e-03
   4.6890000e-02
   6.9780000e-02
   3.1970000e-02
   1.4640000e-02
   6.0680000e-02
   3.5530000e-02
  -5.3630000e-02
  -4.8560000e-02
  -3.4250000e-02
  -8.6900000e-03
  -5.8000000e-04
  -2.0780000e-02
   4.0880000e-02
   5.0260000e-02
  -1.3790000e-02
  -9.3500000e-03
   3.0630000e-02
  -8.6100000e-03
  -4.1020000e-02
   1.3220000e-02
   1.0970000e-02
  -2.5830000e-02
  -1.0530000e-02
   1.9990000e-02
   2.9720000e-02
   3.1120000e-02
   6.3120000e-02
   1.1570000e-01
   9.7220000e-02
   4.3540000e-02
  -1.9250000e-02
  -7.5210000e-02
  -9.5390000e-02
  -1.4115000e-01
  -1.1140000e-01
  -3.7750000e-02
   2.2670000e-02
   5.1900000e-02
   9.4460000e-02
   1.1121000e-01
   7.3670000e-02
   7.0820000e-02
   5.9550000e-02
   2.8980000e-02
   1.3110000e-02
  -6.9600000e-03
   2.2200000e-03
  -3.1230000e-02
  -5.3930000e-02
  -3.5200000e-02
  -2.7530000e-02
  -1.3460000e-02
   2.3200000e-02
   5.1820000e-02
   3.7260000e-02
   3.9780000e-02
   3.9870000e-02
   2.3250000e-02
   4.8860000e-02
   1.6200000e-02
  -8.9700000e-03
   3.7180000e-02
  -2.6600000e-03
  -1.2670000e-02
  -3.7590000e-02
  -4.0170000e-02
  -1.5000000e-02
  -3.7180000e-02
  -3.7150000e-02
  -7.5100000e-03
   8.6900000e-03
  -2.6300000e-03
   2.5530000e-02
   3.3260000e-02
   1.0940000e-02
   2.3830000e-02
  -1.4560000e-02
  -2.9970000e-02
   1.7990000e-02
  -9.5100000e-03
  -2.9600000e-03
   1.7440000e-02
   5.1300000e-03
   2.3630000e-02
   2.0700000e-02
   3.3370000e-02
   5.0150000e-02
   2.6600000e-03
  -3.8500000e-02
  -2.8350000e-02
  -3.7540000e-02
  -7.5540000e-02
  -6.9400000e-03
   3.2740000e-02
   2.4070000e-02
   9.2510000e-02
   9.2870000e-02
   4.6090000e-02
   2.9390000e-02
  -2.4460000e-02
  -6.3360000e-02
  -2.2070000e-02
  -5.1500000e-03
  -2.5720000e-02
   3.0540000e-02
   5.5140000e-02
   1.7190000e-02
  -7.4900000e-03
   1.2100000e-03
   4.8200000e-02
   2.6320000e-02
   2.8620000e-02
   9.0070000e-02
   6.2050000e-02
   1.2010000e-02
   2.4460000e-02
   1.2300000e-03
  -2.8570000e-02
  -3.3370000e-02
  -3.0490000e-02
  -9.9800000e-03
   6.6400000e-03
  -2.8900000e-02
  -1.1900000e-02
   1.8600000e-03
  -4.1180000e-02
  -2.7310000e-02
   1.1630000e-02
   6.8190000e-02
   8.6830000e-02
   6.7830000e-02
   4.1590000e-02
   4.2310000e-02
  -2.3940000e-02
  -1.0715000e-01
  -8.2470000e-02
  -4.9160000e-02
  -2.4210000e-02
   3.1780000e-02
   6.8240000e-02
   1.0156000e-01
   8.1050000e-02
   2.7140000e-02
  -1.8450000e-02
  -3.4110000e-02
  -3.9810000e-02
  -5.7960000e-02
  -2.4100000e-02
  -1.9630000e-02
   3.1300000e-03
   1.0970000e-02
  -1.3710000e-02
   4.6060000e-02
   3.4550000e-02
   4.8940000e-02
   1.0339000e-01
   9.0040000e-02
   4.5870000e-02
   9.8200000e-03
  -7.4960000e-02
  -1.1886000e-01
  -8.4040000e-02
  -7.9130000e-02
  -4.8260000e-02
   6.5310000e-02
   1.4433000e-01
   1.2522000e-01
   9.1380000e-02
   3.9870000e-02
  -1.8370000e-02
  -8.3570000e-02
  -1.0814000e-01
  -5.7060000e-02
   1.5490000e-02
   2.3850000e-02
   3.3860000e-02
   5.2640000e-02
   3.6820000e-02
  -3.3700000e-03
  -3.4710000e-02
   1.2940000e-02
   6.6490000e-02
   4.2310000e-02
   2.4180000e-02
   2.9780000e-02
   4.3600000e-03
  -5.0700000e-02
  -8.7520000e-02
  -8.3600000e-02
  -2.1990000e-02
   1.5960000e-02
   3.3040000e-02
   7.0000000e-02
   6.1010000e-02
   4.7130000e-02
   3.1280000e-02
   2.6650000e-02
   4.3840000e-02
   3.9590000e-02
   3.9810000e-02
   2.5660000e-02
  -3.2270000e-02
  -8.0860000e-02
  -8.2580000e-02
  -9.4730000e-02
  -9.2950000e-02
   3.7970000e-02
   1.0622000e-01
   7.9130000e-02
   1.1039000e-01
   1.0520000e-01
   8.2910000e-02
   7.7300000e-03
  -2.1080000e-02
   1.5100000e-03
   8.4700000e-03
  -4.8690000e-02
  -5.4890000e-02
   1.9700000e-03
  -6.6740000e-02
  -6.8190000e-02
   1.4300000e-03
   2.9230000e-02
   8.2280000e-02
   9.2070000e-02
   7.6030000e-02
   5.5960000e-02
  -2.0590000e-02
  -7.3650000e-02
  -1.0194000e-01
  -7.2440000e-02
  -3.4850000e-02
   5.0200000e-03
   4.6940000e-02
   4.5380000e-02
   4.4010000e-02
   2.3660000e-02
   1.4120000e-02
  -2.0920000e-02
  -3.1200000e-02
  -2.7250000e-02
  -3.4740000e-02
  -1.7470000e-02
  -2.8130000e-02
  -7.8100000e-03
   4.8720000e-02
   4.8260000e-02
   6.9070000e-02
   8.6890000e-02
   6.9640000e-02
   2.3170000e-02
  -5.7300000e-03
  -3.3040000e-02
  -7.0160000e-02
  -4.9190000e-02
  -5.2150000e-02
  -3.4660000e-02
   2.8790000e-02
   2.3830000e-02
   5.5140000e-02
   1.0230000e-01
   6.5610000e-02
   5.2290000e-02
   5.7330000e-02
   4.7650000e-02
   1.8040000e-02
  -6.7200000e-03
  -8.3900000e-03
  -9.2900000e-03
  -3.6990000e-02
  -4.5570000e-02
  -1.8370000e-02
   6.4700000e-03
   1.2120000e-02
   3.4490000e-02
   1.4560000e-02
   1.2230000e-02
   3.6900000e-02
  -2.3900000e-03
  -1.9630000e-02
   2.5310000e-02
   3.2900000e-02
   2.9200000e-02
   2.3360000e-02
   1.0800000e-02
   3.8000000e-04
  -2.4160000e-02
  -9.2760000e-02
  -7.3100000e-02
  -2.2670000e-02
  -9.4600000e-03
   0.0000000e+00
   4.9160000e-02
   6.8160000e-02
   5.6560000e-02
   5.1440000e-02
   3.4190000e-02
   2.7800000e-02
   1.3110000e-02
   1.6700000e-03
  -1.2480000e-02
  -4.1460000e-02
  -2.8300000e-02
  -6.9590000e-02
  -8.4370000e-02
  -2.1390000e-02
  -6.7200000e-03
   1.3220000e-02
   4.7210000e-02
   7.3810000e-02
   6.1200000e-02
   4.4580000e-02
   2.1700000e-03
   8.2500000e-03
  -1.1410000e-02
  -4.9710000e-02
  -2.0800000e-03
   1.7190000e-02
   1.8230000e-02
   4.9680000e-02
   4.5820000e-02
   2.5960000e-02
  -1.3330000e-02
  -4.0220000e-02
  -1.8100000e-03
   1.4010000e-02
   1.2120000e-02
   4.5460000e-02
   6.3830000e-02
   2.0510000e-02
   2.0510000e-02
   3.9620000e-02
  -1.4340000e-02
  -1.3870000e-02
  -2.2700000e-02
  -5.6430000e-02
  -9.2900000e-03
  -1.6620000e-02
  -7.1600000e-03
   1.3300000e-02
   1.6560000e-02
   6.1960000e-02
   4.1540000e-02
  -8.6900000e-03
   1.5570000e-02
   1.4940000e-02
  -6.0620000e-02
  -7.7890000e-02
  -5.5060000e-02
  -1.6530000e-02
   2.6070000e-02
   2.8650000e-02
   9.8840000e-02
   1.6563000e-01
   8.6230000e-02
   6.7830000e-02
   5.8430000e-02
  -3.3090000e-02
  -7.9290000e-02
  -8.1820000e-02
  -9.2540000e-02
  -1.0863000e-01
  -4.2690000e-02
  -2.0950000e-02
   5.6800000e-03
   3.8630000e-02
   8.3100000e-02
   1.4702000e-01
   1.4057000e-01
   1.4499000e-01
   1.1562000e-01
   5.3500000e-03
  -1.9140000e-02
  -5.1740000e-02
  -1.0614000e-01
  -9.9770000e-02
  -9.1140000e-02
  -6.9230000e-02
  -3.4160000e-02
  -3.5180000e-02
  -3.3450000e-02
   4.7100000e-02
   4.9960000e-02
   1.8420000e-02
   1.0438000e-01
   1.2431000e-01
   8.5900000e-02
   8.5110000e-02
   2.7360000e-02
  -9.8200000e-03
  -5.3520000e-02
  -1.2355000e-01
  -1.3630000e-01
  -1.1280000e-01
  -7.3450000e-02
  -7.1970000e-02
  -1.6150000e-02
   7.0990000e-02
   4.9190000e-02
   3.8300000e-02
   8.4860000e-02
   1.2097000e-01
   7.7370000e-02
   5.2230000e-02
   6.3470000e-02
   3.3480000e-02
  -8.7200000e-03
  -6.4620000e-02
  -6.8380000e-02
  -3.3500000e-02
  -9.1880000e-02
  -7.2600000e-02
  -3.0020000e-02
  -2.1140000e-02
   6.5300000e-03
   5.4320000e-02
   6.6240000e-02
   1.0438000e-01
   1.0970000e-01
   6.9040000e-02
   8.5020000e-02
   5.9960000e-02
   1.5770000e-02
   2.1900000e-03
  -3.8850000e-02
  -7.3700000e-02
  -5.3410000e-02
  -7.5620000e-02
  -4.2060000e-02
  -9.9300000e-03
   2.0970000e-02
   5.5550000e-02
   4.5840000e-02
   5.1520000e-02
   6.2070000e-02
   2.2130000e-02
   2.3990000e-02
   9.9580000e-02
   6.7780000e-02
  -2.7720000e-02
  -3.0300000e-02
  -6.0400000e-02
  -7.2270000e-02
  -9.8290000e-02
  -8.6150000e-02
   1.2450000e-02
   4.3760000e-02
   2.6620000e-02
   4.3620000e-02
   1.3150000e-01
   7.2190000e-02
  -5.3960000e-02
  -3.1060000e-02
   1.0970000e-02
  -3.5810000e-02
  -6.1250000e-02
  -2.9600000e-03
   2.9150000e-02
   2.4760000e-02
   4.7400000e-03
  -2.7000000e-04
   4.8640000e-02
   5.4510000e-02
   7.9200000e-03
   2.5440000e-02
   6.3830000e-02
   2.1280000e-02
  -7.0550000e-02
  -4.9570000e-02
  -2.7830000e-02
  -6.3990000e-02
  -1.7850000e-02
   2.4680000e-02
   3.3610000e-02
   5.9140000e-02
   4.1180000e-02
   5.1820000e-02
   6.2900000e-02
   9.3500000e-03
  -3.6500000e-03
   1.4670000e-02
   9.5100000e-03
   6.2000000e-03
   1.5220000e-02
   2.2430000e-02
  -6.7400000e-03
  -2.6430000e-02
  -1.6510000e-02
  -4.2850000e-02
  -6.0650000e-02
  -1.8590000e-02
   1.3300000e-02
  -1.5050000e-02
  -4.3490000e-02
  -1.6530000e-02
   8.2300000e-03
   1.2310000e-02
   5.4320000e-02
   9.9120000e-02
   1.1867000e-01
   9.7200000e-02
   5.1550000e-02
   2.4320000e-02
  -2.4350000e-02
  -9.4730000e-02
  -8.9710000e-02
  -7.9290000e-02
  -7.8830000e-02
  -9.1580000e-02
  -6.6160000e-02
  -5.2000000e-04
   5.2040000e-02
   1.0773000e-01
   1.4373000e-01
   1.7268000e-01
   1.5091000e-01
   1.0542000e-01
   4.5430000e-02
  -2.5660000e-02
  -9.6700000e-02
  -1.1074000e-01
  -1.0104000e-01
  -9.4540000e-02
  -4.6280000e-02
  -2.7000000e-04
  -7.1000000e-04
   2.2180000e-02
   4.3380000e-02
   4.9870000e-02
   6.0700000e-02
   1.0243000e-01
   1.2558000e-01
   1.2505000e-01
   9.1330000e-02
   9.3500000e-03
  -1.9410000e-02
  -7.9650000e-02
  -1.2903000e-01
  -1.0572000e-01
  -8.2450000e-02
  -2.9360000e-02
   3.1800000e-03
   3.4330000e-02
   8.8070000e-02
   7.5450000e-02
   5.1050000e-02
   5.0530000e-02
   4.6360000e-02
   2.0320000e-02
   2.0260000e-02
   1.5740000e-02
  -2.2650000e-02
  -4.8860000e-02
  -5.3710000e-02
  -9.1110000e-02
  -7.7260000e-02
  -2.0540000e-02
  -4.8500000e-03
   1.6120000e-02
   7.0030000e-02
   1.0101000e-01
   7.0050000e-02
   1.5240000e-02
  -8.8300000e-03
  -2.0760000e-02
  -4.2250000e-02
  -6.0650000e-02
  -1.8420000e-02
   2.9780000e-02
   4.2740000e-02
   5.7850000e-02
   3.4550000e-02
   5.0750000e-02
   2.9340000e-02
  -3.1060000e-02
  -1.2530000e-02
   6.4700000e-03
  -3.9240000e-02
  -3.4930000e-02
  -1.9820000e-02
  -9.0200000e-03
   9.4600000e-03
   1.4500000e-02
   3.1480000e-02
   7.2600000e-02
   9.9390000e-02
   3.9150000e-02
   5.0390000e-02
   5.2450000e-02
  -8.8000000e-03
  -2.8840000e-02
  -6.3450000e-02
  -3.6360000e-02
  -2.1360000e-02
  -2.2180000e-02
   2.6380000e-02
   5.0830000e-02
   5.5770000e-02
   5.1190000e-02
   4.0030000e-02
   8.9400000e-03
  -1.8070000e-02
  -8.0000000e-04
  -1.1300000e-02
  -2.2350000e-02
   7.2700000e-03
   3.1890000e-02
   2.1740000e-02
   4.7000000e-04
   2.9230000e-02
   3.5010000e-02
  -6.6400000e-03
  -5.4600000e-03
   1.6420000e-02
   1.4590000e-02
  -4.1700000e-03
  -4.0770000e-02
  -8.3100000e-03
   2.1390000e-02
  -9.6000000e-03
  -2.1550000e-02
   1.8180000e-02
   5.4070000e-02
   5.3580000e-02
   1.1950000e-02
   3.6050000e-02
   6.7310000e-02
  -6.9600000e-03
  -4.4010000e-02
   8.4200000e-03
   1.7470000e-02
  -1.6230000e-02
  -2.5580000e-02
   4.1400000e-03
  -1.5770000e-02
  -2.9340000e-02
  -1.3020000e-02
   2.1910000e-02
   7.1890000e-02
   7.1370000e-02
   4.6470000e-02
   3.5480000e-02
   2.0870000e-02
  -3.4140000e-02
  -8.9960000e-02
  -5.1790000e-02
  -1.1100000e-02
  -2.2760000e-02
  -6.6100000e-03
   1.6970000e-02
   3.5180000e-02
   4.3870000e-02
  -1.5110000e-02
  -2.7990000e-02
   7.9320000e-02
   7.0270000e-02
   1.6200000e-02
   4.6750000e-02
   4.5130000e-02
  -7.8400000e-03
  -6.9890000e-02
  -8.7000000e-02
  -3.1480000e-02
  -8.6400000e-03
  -8.1700000e-03
   2.8190000e-02
   8.8890000e-02
   3.5700000e-02
   1.9710000e-02
   4.9050000e-02
   1.7160000e-02
   2.1360000e-02
   2.3520000e-02
   2.9170000e-02
   4.4800000e-02
   2.2480000e-02
  -1.7550000e-02
  -3.3500000e-02
  -3.1590000e-02
  -3.0630000e-02
  -3.7620000e-02
   1.2010000e-02
   5.3250000e-02
   3.8140000e-02
   3.8550000e-02
   3.5230000e-02
   4.9600000e-03
  -1.5820000e-02
   3.1000000e-03
   1.5190000e-02
   3.8710000e-02
   1.0271000e-01
   6.2210000e-02
   2.2070000e-02
  -4.0850000e-02
  -6.6410000e-02
  -7.9840000e-02
  -9.7690000e-02
  -3.2300000e-02
   7.0030000e-02
   1.0400000e-01
   9.1630000e-02
   9.6570000e-02
   4.9710000e-02
  -1.4310000e-02
  -7.1120000e-02
  -1.0825000e-01
  -4.0740000e-02
   3.6440000e-02
   1.6010000e-02
   2.2950000e-02
   3.0850000e-02
  -4.1890000e-02
  -1.1414000e-01
  -1.1782000e-01
  -3.0680000e-02
   8.6890000e-02
   1.2042000e-01
   1.5074000e-01
   1.7962000e-01
   9.9450000e-02
  -2.3470000e-02
  -9.5990000e-02
  -1.1118000e-01
  -1.1118000e-01
  -8.8510000e-02
  -4.4530000e-02
   2.9890000e-02
   6.4430000e-02
   3.4500000e-03
   5.4300000e-03
   1.1240000e-02
   5.0400000e-03
   3.9070000e-02
   7.8740000e-02
   1.0921000e-01
   1.0712000e-01
   4.3950000e-02
  -2.9900000e-03
  -4.8690000e-02
  -6.9200000e-02
  -6.5010000e-02
  -2.7090000e-02
   3.6110000e-02
   6.0100000e-02
   4.7460000e-02
   2.5640000e-02
   8.0000000e-04
  -4.8370000e-02
  -6.2650000e-02
  -3.0410000e-02
   2.9640000e-02
   6.5170000e-02
   6.9120000e-02
   3.9020000e-02
   4.1350000e-02
   1.7110000e-02
  -7.9900000e-02
  -9.5550000e-02
  -1.5770000e-02
  -1.3540000e-02
   5.7000000e-03
   9.6680000e-02
   7.5040000e-02
   3.7290000e-02
   1.8480000e-02
  -1.6480000e-02
  -2.0920000e-02
   1.7800000e-03
   1.1160000e-02
   3.7010000e-02
   7.0930000e-02
   4.4230000e-02
   1.4000000e-04
  -3.1450000e-02
  -2.9360000e-02
  -1.3020000e-02
  -1.0530000e-02
   3.0760000e-02
   8.4280000e-02
   4.2550000e-02
  -8.4200000e-03
  -2.4370000e-02
  -6.2350000e-02
  -3.3500000e-02
   1.3240000e-02
   1.9690000e-02
   3.2710000e-02
   3.8660000e-02
   2.4400000e-02
  -1.7080000e-02
  -6.4570000e-02
  -6.3230000e-02
  -2.1030000e-02
  -7.3500000e-03
   1.8400000e-03
   8.1210000e-02
   1.2426000e-01
   4.0440000e-02
   1.3680000e-02
   2.0260000e-02
  -1.2560000e-02
  -4.7870000e-02
  -2.8820000e-02
   1.7930000e-02
   3.7040000e-02
   2.3800000e-02
  -1.4890000e-02
  -2.6130000e-02
  -1.2300000e-03
  -5.6120000e-02
  -5.1770000e-02
   4.2110000e-02
   7.9790000e-02
   1.6830000e-02
   1.2150000e-02
   4.2910000e-02
   2.5360000e-02
  -1.5000000e-02
  -3.1560000e-02
   1.6370000e-02
   3.8170000e-02
  -7.6500000e-03
  -2.0020000e-02
   3.1970000e-02
   3.0000000e-05
  -4.6640000e-02
  -5.0890000e-02
  -8.1700000e-03
   5.2230000e-02
   5.0370000e-02
   4.9710000e-02
   9.9640000e-02
   8.8310000e-02
  -1.7490000e-02
  -4.6860000e-02
  -7.0200000e-03
  -2.9420000e-02
  -3.0160000e-02
   3.7480000e-02
   8.7630000e-02
   6.0510000e-02
  -3.1700000e-02
  -3.0820000e-02
  -2.2570000e-02
  -1.0131000e-01
  -9.1820000e-02
   3.1370000e-02
   9.1880000e-02
   6.1170000e-02
   8.5760000e-02
   1.4238000e-01
   1.0542000e-01
  -3.2600000e-03
  -4.5290000e-02
  -2.2540000e-02
  -6.0270000e-02
  -1.1916000e-01
  -7.7760000e-02
  -3.6710000e-02
  -5.0420000e-02
  -1.9380000e-02
   4.9960000e-02
   1.1902000e-01
   1.0655000e-01
   8.0640000e-02
   1.0635000e-01
   4.9630000e-02
  -6.6350000e-02
  -7.7370000e-02
  -7.5700000e-02
  -8.4340000e-02
  -7.6410000e-02
  -4.2880000e-02
   2.9120000e-02
   6.0460000e-02
   4.6450000e-02
   4.1460000e-02
   9.3080000e-02
   7.8030000e-02
   1.6920000e-02
   2.5550000e-02
   2.7450000e-02
  -2.1060000e-02
  -7.5020000e-02
  -7.4440000e-02
  -2.6540000e-02
  -5.7930000e-02
  -6.3750000e-02
   1.6700000e-02
   5.4150000e-02
   3.2760000e-02
   2.7120000e-02
   3.5620000e-02
   4.8390000e-02
   3.5100000e-02
   4.4100000e-03
   3.4030000e-02
   2.2890000e-02
   7.2100000e-03
  -1.4860000e-02
  -1.7850000e-02
   7.2700000e-03
  -4.2060000e-02
  -4.6310000e-02
   8.5800000e-03
  -9.3500000e-03
  -2.5690000e-02
   3.5420000e-02
   3.4550000e-02
   5.9500000e-03
   5.2070000e-02
   8.0280000e-02
   6.2840000e-02
   7.5260000e-02
   3.1670000e-02
   1.8070000e-02
   3.7010000e-02
  -7.4080000e-02
  -8.8590000e-02
  -4.3460000e-02
  -4.5600000e-02
  -2.4950000e-02
   8.1200000e-03
   5.6400000e-02
   4.5790000e-02
   4.7400000e-03
  -1.1500000e-03
  -1.5380000e-02
  -3.4680000e-02
   8.3600000e-03
   8.7460000e-02
   1.1151000e-01
   8.1820000e-02
   9.0010000e-02
   2.5830000e-02
  -3.4600000e-02
  -8.0140000e-02
  -1.4688000e-01
  -9.8840000e-02
  -1.6310000e-02
  -3.7120000e-02
  -2.4020000e-02
   4.9350000e-02
   5.9220000e-02
   5.6840000e-02
   8.0060000e-02
   1.1033000e-01
   1.2207000e-01
   1.0279000e-01
   2.3770000e-02
   2.9670000e-02
  -2.1000000e-02
  -1.3377000e-01
  -1.5360000e-01
  -1.1337000e-01
  -7.9730000e-02
  -5.4120000e-02
   4.8280000e-02
   1.0041000e-01
   8.7030000e-02
   8.7930000e-02
   7.0160000e-02
   6.0400000e-02
  -7.4300000e-03
  -5.4600000e-03
   4.5200000e-03
  -2.7200000e-02
  -3.0870000e-02
  -2.9230000e-02
  -3.3150000e-02
  -3.2020000e-02
  -1.9800000e-02
  -3.2960000e-02
  -4.5200000e-03
   4.4100000e-03
  -1.0500000e-02
  -1.2640000e-02
  -1.5490000e-02
  -6.0000000e-04
   1.7300000e-03
   5.5490000e-02
   8.1130000e-02
   7.2410000e-02
   9.1030000e-02
   5.1050000e-02
  -7.4600000e-03
  -3.7260000e-02
  -4.5350000e-02
  -4.6120000e-02
  -3.5950000e-02
  -1.2610000e-02
   1.1020000e-02
   4.5270000e-02
   5.7580000e-02
  -1.1820000e-02
   2.3000000e-03
   2.4510000e-02
   3.0110000e-02
   1.0060000e-02
   1.9600000e-02
   6.5390000e-02
   5.7770000e-02
  -1.1950000e-02
   7.6800000e-03
   5.9000000e-02
   8.7200000e-03
  -2.7120000e-02
  -2.3850000e-02
  -2.3110000e-02
  -5.9850000e-02
  -6.1440000e-02
  -2.8410000e-02
   4.2330000e-02
   1.3820000e-02
   1.8180000e-02
   1.0501000e-01
   7.5350000e-02
   4.3430000e-02
   6.7700000e-02
   1.7770000e-02
   2.9150000e-02
   1.1790000e-02
  -8.1680000e-02
  -5.7800000e-02
  -6.2840000e-02
  -9.5000000e-02
  -6.0100000e-02
  -6.4700000e-03
  -1.2420000e-02
   5.3820000e-02
   9.8210000e-02
   6.0210000e-02
   7.0410000e-02
   5.2700000e-02
   1.0230000e-02
  -2.5860000e-02
  -6.7340000e-02
  -3.6030000e-02
  -1.7680000e-02
  -4.5320000e-02
  -3.8100000e-03
   2.2070000e-02
   3.7210000e-02
   3.6550000e-02
   1.1820000e-02
   2.8620000e-02
   6.3030000e-02
   3.3400000e-02
   2.7910000e-02
   5.3740000e-02
   1.1500000e-03
  -2.8320000e-02
  -2.2370000e-02
  -5.7690000e-02
  -3.1120000e-02
  -1.5410000e-02
  -8.5500000e-03
   6.0680000e-02
   6.3060000e-02
   2.8240000e-02
   4.0690000e-02
   2.8840000e-02
   5.4000000e-03
   4.5500000e-03
   6.7200000e-03
   2.4730000e-02
   2.3140000e-02
  -9.9800000e-03
  -9.4900000e-03
  -1.6370000e-02
  -5.1440000e-02
  -2.6710000e-02
  -1.1320000e-02
   4.8500000e-03
   5.4640000e-02
   4.3900000e-02
   2.8380000e-02
   3.7620000e-02
  -1.1020000e-02
  -4.5760000e-02
   1.4810000e-02
   2.4480000e-02
   1.3330000e-02
   7.9510000e-02
   3.8550000e-02
  -2.3200000e-02
  -1.4830000e-02
  -5.9990000e-02
  -5.9630000e-02
  -5.2860000e-02
  -1.8560000e-02
   1.2720000e-02
   2.4570000e-02
   7.0710000e-02
   7.3290000e-02
   6.0020000e-02
   2.9780000e-02
   3.5310000e-02
   5.2940000e-02
   7.1000000e-04
   5.5100000e-03
  -2.1910000e-02
  -4.9870000e-02
  -6.9290000e-02
  -8.4560000e-02
  -4.5130000e-02
  -2.8840000e-02
  -1.7380000e-02
   5.8650000e-02
   8.5650000e-02
   8.7680000e-02
   9.6160000e-02
   6.2510000e-02
   5.1240000e-02
   1.6230000e-02
  -1.2230000e-02
  -4.9760000e-02
  -2.8730000e-02
  -1.9910000e-02
  -3.6470000e-02
  -3.6930000e-02
  -3.2570000e-02
  -2.6380000e-02
  -1.2500000e-02
   7.4000000e-03
   1.5680000e-02
   4.2470000e-02
   4.7350000e-02
   4.6060000e-02
   2.3310000e-02
   2.8510000e-02
   3.4110000e-02
  -2.3900000e-03
   4.5200000e-03
   2.3720000e-02
  -2.6320000e-02
  -3.7750000e-02
  -5.1350000e-02
  -8.3080000e-02
  -7.3860000e-02
  -1.3600000e-02
   6.6240000e-02
   8.8530000e-02
   1.2275000e-01
   1.1782000e-01
   1.0200000e-01
   3.8520000e-02
  -4.2280000e-02
  -2.6920000e-02
  -4.6040000e-02
  -8.7490000e-02
  -5.8070000e-02
  -2.9970000e-02
  -6.5800000e-03
   1.3430000e-02
   4.0170000e-02
   8.4670000e-02
   1.1927000e-01
   1.0194000e-01
   6.1990000e-02
   2.7800000e-02
  -4.3510000e-02
  -8.6700000e-02
  -8.3080000e-02
  -6.2050000e-02
  -1.9440000e-02
   8.5500000e-03
   3.3750000e-02
   5.4970000e-02
   6.2400000e-02
   3.8820000e-02
   3.8000000e-04
   1.8120000e-02
  -3.3700000e-03
  -2.2430000e-02
  -1.4590000e-02
   2.7000000e-04
   1.4280000e-02
  -1.3400000e-03
   8.9100000e-03
   4.2140000e-02
   1.2890000e-02
  -2.2890000e-02
  -1.3200000e-03
  -5.2400000e-03
  -5.5080000e-02
  -5.7820000e-02
  -3.3370000e-02
  -3.8820000e-02
  -2.0670000e-02
   1.3380000e-02
   6.4020000e-02
   9.4240000e-02
   8.2040000e-02
   5.6760000e-02
   5.5250000e-02
   1.1870000e-02
  -5.4510000e-02
  -5.6320000e-02
  -6.8460000e-02
  -6.1830000e-02
  -5.4510000e-02
  -3.0410000e-02
   2.1000000e-02
   1.3350000e-02
   3.3720000e-02
   8.3350000e-02
   8.6180000e-02
   7.4440000e-02
   9.5580000e-02
   7.4060000e-02
   1.5490000e-02
  -3.0400000e-03
   7.9500000e-03
  -1.8750000e-02
  -4.1100000e-03
  -1.3700000e-03
  -5.4890000e-02
  -2.7860000e-02
  -3.1010000e-02
  -6.6930000e-02
  -7.9350000e-02
  -5.1130000e-02
   1.7710000e-02
   8.0310000e-02
   7.4000000e-02
   1.1609000e-01
   1.8200000e-01
   8.2140000e-02
   1.8730000e-02
   3.8880000e-02
  -3.8280000e-02
  -1.1365000e-01
  -1.0690000e-01
  -9.7200000e-02
  -5.9830000e-02
  -5.0200000e-02
  -2.0810000e-02
   4.8560000e-02
   1.1058000e-01
   8.5080000e-02
   8.1380000e-02
   1.0216000e-01
   3.5120000e-02
   8.9900000e-03
   6.6000000e-04
  -5.3030000e-02
  -6.9420000e-02
  -7.0190000e-02
  -4.8200000e-02
  -3.1970000e-02
  -2.6430000e-02
  -1.4000000e-04
   5.2230000e-02
   6.3690000e-02
   2.7280000e-02
   8.6920000e-02
   8.6260000e-02
   1.5190000e-02
   2.2800000e-03
  -3.6220000e-02
  -4.0910000e-02
  -7.3800000e-03
  -2.4920000e-02
  -3.3480000e-02
   3.8630000e-02
   5.2900000e-03
  -1.1050000e-02
   3.3860000e-02
   3.4990000e-02
   3.2000000e-02
   3.2870000e-02
   1.6640000e-02
   4.1130000e-02
   1.7770000e-02
  -4.4880000e-02
  -2.9670000e-02
  -4.6310000e-02
  -9.1080000e-02
  -6.9090000e-02
  -4.4170000e-02
   1.3600000e-02
   6.0810000e-02
   5.3660000e-02
   1.0981000e-01
   1.5058000e-01
   7.6800000e-02
   7.8400000e-03
   2.2200000e-03
  -3.8470000e-02
  -8.2720000e-02
  -9.5500000e-02
  -8.2090000e-02
  -5.6620000e-02
  -3.2930000e-02
  -1.1800000e-03
   5.0720000e-02
   1.0474000e-01
   1.1220000e-01
   7.8910000e-02
   5.2040000e-02
   3.0320000e-02
  -3.0110000e-02
  -7.5040000e-02
  -5.0940000e-02
  -4.6470000e-02
  -1.7220000e-02
   6.3250000e-02
   4.6390000e-02
   8.7520000e-02
   1.4529000e-01
   6.3910000e-02
   4.3300000e-03
  -1.6730000e-02
  -5.3410000e-02
  -1.1228000e-01
  -1.1354000e-01
  -7.8140000e-02
  -2.4590000e-02
   6.4980000e-02
   5.0940000e-02
   6.9640000e-02
   1.3410000e-01
   1.2821000e-01
   9.8810000e-02
   4.0690000e-02
   3.2850000e-02
   1.0100000e-03
  -9.8810000e-02
  -1.1425000e-01
  -7.9650000e-02
  -6.5010000e-02
  -2.9940000e-02
   7.5700000e-03
   7.1290000e-02
   9.2120000e-02
   5.8320000e-02
   4.1290000e-02
   3.8930000e-02
  -2.8600000e-02
  -9.2840000e-02
  -3.6580000e-02
  -6.9100000e-03
  -4.3000000e-03
  -9.9000000e-04
  -2.7280000e-02
   1.8010000e-02
   3.4550000e-02
  -2.1000000e-02
  -8.4200000e-03
   4.8370000e-02
   3.6250000e-02
  -1.6670000e-02
   3.3700000e-03
   2.5580000e-02
   1.7440000e-02
  -2.5120000e-02
  -2.5170000e-02
   2.4510000e-02
   2.0450000e-02
  -2.0180000e-02
  -1.7500000e-03
   2.8840000e-02
  -6.3000000e-04
  -2.9750000e-02
   1.1870000e-02
   4.3180000e-02
   3.9670000e-02
   2.1800000e-02
   3.5180000e-02
   3.5530000e-02
  -4.9160000e-02
  -6.7310000e-02
  -5.4230000e-02
  -2.3830000e-02
   2.7610000e-02
   5.8180000e-02
   7.1670000e-02
   9.5610000e-02
   6.3340000e-02
   3.2190000e-02
   2.4480000e-02
   8.2000000e-04
  -3.9100000e-02
  -4.6340000e-02
  -2.9780000e-02
  -4.3210000e-02
  -3.6470000e-02
  -1.3130000e-02
   4.3490000e-02
   1.0112000e-01
   9.1770000e-02
   8.0120000e-02
   1.0180000e-01
   1.8840000e-02
  -9.2340000e-02
  -1.0954000e-01
  -7.6740000e-02
  -8.8180000e-02
  -2.4290000e-02
   3.7780000e-02
   8.0390000e-02
   1.0649000e-01
   4.2330000e-02
   2.3550000e-02
   8.5500000e-03
  -5.7470000e-02
  -8.0200000e-02
  -2.0590000e-02
   7.1000000e-04
   9.5700000e-03
   1.8810000e-02
   6.8500000e-03
   1.3540000e-02
   1.2280000e-02
   1.9300000e-02
   9.8490000e-02
   7.5400000e-02
   3.9370000e-02
   5.9940000e-02
  -1.1600000e-02
  -5.6120000e-02
  -3.0710000e-02
  -4.1460000e-02
  -7.2800000e-02
   3.1830000e-02
   6.3690000e-02
   3.5310000e-02
   4.9240000e-02
   3.1530000e-02
  -1.2200000e-02
  -4.5710000e-02
  -1.1129000e-01
  -5.2620000e-02
   4.5000000e-03
  -3.5260000e-02
   2.8300000e-02
   9.5090000e-02
   1.0751000e-01
   3.9260000e-02
   2.7120000e-02
   1.2200000e-02
  -6.0900000e-03
  -3.6490000e-02
  -3.7560000e-02
   5.1800000e-03
   6.2500000e-03
  -9.1600000e-03
  -6.5000000e-03
  -5.2400000e-03
   1.3460000e-02
  -3.3340000e-02
  -3.4030000e-02
   6.8550000e-02
   6.7560000e-02
   4.0830000e-02
   6.6650000e-02
   5.5360000e-02
   9.5400000e-03
  -2.1660000e-02
  -3.5290000e-02
   3.4800000e-03
   3.5200000e-02
  -1.5220000e-02
  -1.8700000e-02
   3.3090000e-02
  -5.3550000e-02
  -1.2525000e-01
  -9.9720000e-02
  -2.1250000e-02
   3.8440000e-02
   5.1900000e-02
   1.2374000e-01
   1.9552000e-01
   1.3912000e-01
   5.5490000e-02
   1.4260000e-02
  -1.1570000e-02
  -5.1130000e-02
  -1.0701000e-01
  -7.9210000e-02
  -1.8420000e-02
  -2.5770000e-02
  -5.3580000e-02
  -1.4010000e-02
   5.2400000e-03
   5.9110000e-02
   1.2105000e-01
   7.9350000e-02
   1.1603000e-01
   1.0126000e-01
  -4.9020000e-02
  -1.0668000e-01
  -1.0860000e-01
  -1.1644000e-01
  -7.4850000e-02
   1.2420000e-02
   4.3980000e-02
   1.0688000e-01
   1.1269000e-01
  -1.5350000e-02
   2.7000000e-04
   3.3000000e-04
  -6.3140000e-02
  -1.2610000e-02
   3.4680000e-02
   5.9880000e-02
   5.8980000e-02
   2.0370000e-02
  -6.5000000e-03
  -6.2200000e-03
  -4.8010000e-02
  -8.5900000e-02
  -7.3200000e-03
   4.8370000e-02
   2.9310000e-02
   3.3500000e-02
   6.3200000e-02
   8.2530000e-02
   6.5800000e-03
   6.3300000e-03
   7.1620000e-02
   9.7300000e-03
  -4.7240000e-02
  -2.2460000e-02
  -3.0490000e-02
  -9.9830000e-02
  -1.0795000e-01
  -4.8910000e-02
   1.0530000e-02
   7.6830000e-02
   8.5430000e-02
   9.7440000e-02
   1.1804000e-01
   4.0690000e-02
   1.9880000e-02
   1.8180000e-02
  -1.1930000e-02
  -7.6500000e-03
  -2.2040000e-02
  -1.7930000e-02
  -2.5440000e-02
  -3.3700000e-03
  -2.7450000e-02
  -1.0310000e-02
   1.9330000e-02
   6.7400000e-03
   3.4770000e-02
   1.8560000e-02
   2.9260000e-02
   4.0660000e-02
   6.8300000e-03
   4.0770000e-02
   4.0000000e-03
  -8.6400000e-03
   3.0460000e-02
   2.7100000e-03
  -3.4440000e-02
  -4.1070000e-02
  -4.2470000e-02
  -8.3570000e-02
  -6.7810000e-02
  -1.0120000e-02
   1.2890000e-02
   1.9770000e-02
   3.2350000e-02
   8.5020000e-02
   1.0230000e-01
   8.1900000e-02
   7.3070000e-02
   4.2000000e-02
   3.0900000e-02
   8.0300000e-03
  -5.5930000e-02
  -4.9740000e-02
  -4.3350000e-02
  -9.3690000e-02
  -9.6790000e-02
  -5.0720000e-02
   5.5000000e-04
   7.2850000e-02
   9.9860000e-02
   1.1321000e-01
   1.4197000e-01
   7.0330000e-02
   2.2070000e-02
  -1.2120000e-02
  -5.1460000e-02
  -7.7730000e-02
  -7.9810000e-02
  -2.8020000e-02
  -2.0120000e-02
  -3.3420000e-02
   4.1700000e-03
   1.7380000e-02
   5.4800000e-03
   1.2090000e-02
   4.4060000e-02
   7.9350000e-02
   1.0268000e-01
   1.2272000e-01
   7.5980000e-02
   1.4390000e-02
  -4.2090000e-02
  -9.1850000e-02
  -6.6320000e-02
  -2.1360000e-02
  -3.0380000e-02
  -2.5220000e-02
   3.8910000e-02
  -1.3540000e-02
  -5.2180000e-02
  -3.7010000e-02
  -3.5530000e-02
   3.0050000e-02
   8.0250000e-02
   1.0221000e-01
   1.3717000e-01
   1.2596000e-01
   4.3460000e-02
  -5.5490000e-02
  -8.1620000e-02
  -1.1263000e-01
  -1.4891000e-01
  -9.8130000e-02
  -2.9890000e-02
   4.0090000e-02
   6.4600000e-02
   5.8070000e-02
   8.3050000e-02
   7.5290000e-02
   7.8610000e-02
   4.7900000e-02
   7.1510000e-02
   6.5060000e-02
  -6.3300000e-03
  -7.8470000e-02
  -9.2780000e-02
  -8.8310000e-02
  -1.3037000e-01
  -1.1691000e-01
  -4.3210000e-02
   4.3920000e-02
   1.2763000e-01
   1.5042000e-01
   1.6160000e-01
   1.3728000e-01
   6.4490000e-02
  -1.1410000e-02
  -6.5750000e-02
  -2.8760000e-02
  -2.1060000e-02
  -1.7990000e-02
   1.6230000e-02
   1.0140000e-02
  -3.5840000e-02
  -7.3650000e-02
  -6.1690000e-02
  -3.5700000e-02
  -4.0390000e-02
   2.8210000e-02
   1.0896000e-01
   8.8560000e-02
   4.5130000e-02
   5.6400000e-02
   6.9900000e-03
  -4.7600000e-02
   2.0000000e-03
  -9.7300000e-03
   1.7440000e-02
   1.8560000e-02
  -1.0340000e-02
  -4.1920000e-02
  -3.1720000e-02
  -3.0870000e-02
  -6.5830000e-02
   1.0780000e-02
   3.7860000e-02
   6.3140000e-02
   1.2985000e-01
   9.1800000e-02
   3.8820000e-02
   4.2910000e-02
   4.2500000e-03
  -5.1740000e-02
  -5.0780000e-02
   3.5970000e-02
   5.0200000e-02
   4.8000000e-03
   6.1100000e-03
   5.1500000e-03
  -4.0800000e-02
  -6.8680000e-02
  -3.7100000e-02
   1.3980000e-02
   9.4150000e-02
   5.1630000e-02
   8.5300000e-03
   5.5580000e-02
  -3.4820000e-02
  -1.1145000e-01
  -3.9430000e-02
  -4.9400000e-03
  -1.4200000e-02
   3.0350000e-02
   7.3970000e-02
   4.5760000e-02
   1.4750000e-02
  -2.0920000e-02
  -4.4250000e-02
  -2.8840000e-02
  -2.1660000e-02
   9.5400000e-03
   5.1660000e-02
   6.7310000e-02
   6.6080000e-02
   5.6500000e-03
  -1.3870000e-02
   8.6100000e-03
  -3.3150000e-02
  -8.5800000e-03
   6.7890000e-02
   5.1790000e-02
   2.1000000e-02
  -2.3280000e-02
  -7.6220000e-02
  -6.6570000e-02
  -3.7590000e-02
  -4.8040000e-02
   3.9400000e-02
   1.1965000e-01
   5.7580000e-02
   4.4250000e-02
   7.0700000e-03
  -3.2520000e-02
  -5.0340000e-02
  -4.4940000e-02
   2.3800000e-02
   6.5010000e-02
   6.8680000e-02
   5.0120000e-02
   5.8370000e-02
   5.2530000e-02
   2.0540000e-02
  -3.0000000e-05
  -2.4270000e-02
   2.5140000e-02
  -1.2970000e-02
  -5.9280000e-02
  -3.1810000e-02
  -9.1080000e-02
  -1.0087000e-01
   4.1100000e-03
   4.0000000e-02
   6.8740000e-02
   1.3989000e-01
   1.4817000e-01
   1.0413000e-01
   7.7760000e-02
  -1.0990000e-02
  -7.5290000e-02
  -6.0100000e-02
  -8.9820000e-02
  -9.3720000e-02
  -8.1190000e-02
   1.8400000e-03
  -8.6600000e-03
  -7.3230000e-02
  -3.3480000e-02
   1.8480000e-02
   2.1500000e-02
   4.0830000e-02
   1.1181000e-01
   1.1976000e-01
   1.0948000e-01
   7.5760000e-02
   9.6800000e-03
   1.5770000e-02
  -2.3280000e-02
  -9.6700000e-02
  -4.0740000e-02
  -1.2450000e-02
  -6.2730000e-02
  -5.1270000e-02
   2.7120000e-02
   2.3850000e-02
  -2.9090000e-02
   6.2000000e-03
   6.9780000e-02
   8.4260000e-02
   5.1980000e-02
   6.9040000e-02
   8.0010000e-02
   2.2100000e-02
  -4.4360000e-02
  -6.2210000e-02
  -1.7360000e-02
  -2.6460000e-02
  -6.4300000e-02
  -1.7710000e-02
   3.4880000e-02
  -1.7220000e-02
  -3.5510000e-02
   3.1230000e-02
   6.1470000e-02
   1.2450000e-02
   5.1980000e-02
   8.0340000e-02
   8.4800000e-02
   4.0850000e-02
  -4.9350000e-02
  -2.8510000e-02
  -3.4250000e-02
  -1.1606000e-01
  -1.2091000e-01
  -5.3200000e-03
   1.6230000e-02
   7.5900000e-03
   8.9250000e-02
   8.9990000e-02
   3.9320000e-02
   1.6230000e-02
   5.2400000e-03
   4.5900000e-02
   5.1030000e-02
   6.2200000e-03
   4.9900000e-03
  -6.0900000e-03
  -6.1990000e-02
  -9.7530000e-02
  -5.6760000e-02
  -2.0260000e-02
   2.7100000e-03
   6.9670000e-02
   1.1124000e-01
   1.5014000e-01
   8.8260000e-02
   2.8460000e-02
   2.2730000e-02
  -1.1500000e-03
  -4.0660000e-02
  -5.2590000e-02
  -1.2610000e-02
  -4.8260000e-02
  -7.9400000e-02
  -3.7810000e-02
  -3.1500000e-02
  -2.6350000e-02
  -1.7520000e-02
   6.3830000e-02
   1.0189000e-01
   8.9880000e-02
   1.3597000e-01
   9.5910000e-02
   2.2810000e-02
  -4.5790000e-02
  -1.1006000e-01
  -1.2966000e-01
  -1.1041000e-01
  -8.6010000e-02
  -5.8540000e-02
   5.1490000e-02
   5.4070000e-02
   5.9770000e-02
   1.2056000e-01
   6.6190000e-02
   5.9550000e-02
   6.9090000e-02
   5.8460000e-02
   4.1980000e-02
   2.1250000e-02
  -1.4120000e-02
  -7.7680000e-02
  -1.1299000e-01
  -1.5675000e-01
  -1.4499000e-01
  -9.1380000e-02
  -4.9740000e-02
   4.4120000e-02
   1.1790000e-01
   1.5324000e-01
   1.4559000e-01
   1.2165000e-01
   7.9980000e-02
   4.4880000e-02
   3.1450000e-02
  -9.9000000e-04
  -1.4860000e-02
  -1.7140000e-02
  -5.6070000e-02
  -1.0466000e-01
  -1.0402000e-01
  -6.8820000e-02
  -6.6130000e-02
  -1.3460000e-02
   8.0310000e-02
   1.4523000e-01
   1.4935000e-01
   1.3605000e-01
   1.2278000e-01
   6.2980000e-02
  -1.1320000e-02
  -3.2220000e-02
  -3.2460000e-02
  -4.2330000e-02
  -8.1050000e-02
  -8.7490000e-02
  -3.6250000e-02
  -6.7340000e-02
  -8.5630000e-02
  -4.5400000e-02
   1.2390000e-02
   6.6850000e-02
   7.8500000e-02
   1.5110000e-01
   1.5861000e-01
   1.0315000e-01
   2.1500000e-02
  -4.9080000e-02
  -3.2270000e-02
  -9.0510000e-02
  -1.1661000e-01
  -6.5890000e-02
  -7.2110000e-02
  -6.8820000e-02
  -6.1090000e-02
  -3.3200000e-02
   1.6230000e-02
   8.4940000e-02
   1.2538000e-01
   1.5656000e-01
   1.4970000e-01
   7.0740000e-02
   1.9170000e-02
  -6.2620000e-02
  -1.1159000e-01
  -7.6030000e-02
  -8.3570000e-02
  -4.9330000e-02
   2.3830000e-02
   2.9040000e-02
   3.4770000e-02
   2.5880000e-02
  -3.7600000e-03
   2.4790000e-02
   7.7980000e-02
   7.2630000e-02
   7.0460000e-02
   8.1620000e-02
   4.6090000e-02
  -7.3200000e-03
  -7.1180000e-02
  -6.7480000e-02
  -2.8760000e-02
  -6.6460000e-02
  -4.1210000e-02
   5.8130000e-02
   5.1270000e-02
   2.1110000e-02
   4.2960000e-02
   3.9980000e-02
   1.5410000e-02
   1.6670000e-02
   3.2680000e-02
   1.4970000e-02
  -1.2900000e-03
   2.2500000e-03
  -5.3770000e-02
  -1.0238000e-01
  -5.8370000e-02
  -2.7170000e-02
  -3.1450000e-02
   2.4840000e-02
   1.0093000e-01
   1.1044000e-01
   1.1466000e-01
   8.7270000e-02
   1.1200000e-03
   1.4480000e-02
   1.8400000e-03
  -7.7350000e-02
  -5.1960000e-02
  -2.4810000e-02
  -5.7770000e-02
  -1.0487000e-01
  -4.4720000e-02
  -2.0000000e-03
  -6.6240000e-02
  -3.1300000e-03
   7.4880000e-02
   1.1080000e-01
   1.1304000e-01
   1.3073000e-01
   1.3627000e-01
   6.3060000e-02
  -3.6800000e-02
  -9.8730000e-02
  -9.2340000e-02
  -8.7050000e-02
  -7.6990000e-02
   2.7700000e-03
   7.4770000e-02
   4.0090000e-02
   3.3290000e-02
   3.7510000e-02
  -2.0890000e-02
  -1.8920000e-02
   2.4400000e-03
  -8.9400000e-03
   4.0770000e-02
   4.7870000e-02
   2.4920000e-02
   4.2880000e-02
   2.7030000e-02
  -2.2870000e-02
   2.8500000e-03
   8.7200000e-03
  -3.8100000e-03
   5.6500000e-03
   1.4070000e-02
   9.9000000e-04
  -1.3740000e-02
  -6.2070000e-02
  -7.5350000e-02
  -3.3180000e-02
  -3.2680000e-02
   1.5660000e-02
   8.3570000e-02
   8.6500000e-02
   7.0900000e-02
   3.8910000e-02
  -1.6090000e-02
  -2.4900000e-02
  -4.3130000e-02
  -5.8040000e-02
  -2.3420000e-02
   3.1940000e-02
   3.6270000e-02
   1.9360000e-02
   7.3200000e-03
   4.3430000e-02
   2.9910000e-02
   1.0830000e-02
   7.7240000e-02
   8.3900000e-02
   5.9440000e-02
   4.4660000e-02
  -1.3300000e-02
  -4.5320000e-02
  -5.7690000e-02
  -3.1150000e-02
   8.2500000e-03
   3.4080000e-02
   2.8300000e-02
   4.7190000e-02
   7.0440000e-02
  -3.4000000e-03
  -1.6750000e-02
   2.1400000e-03
  -2.4570000e-02
  -3.1370000e-02
   1.4090000e-02
   7.5900000e-03
  -1.5980000e-02
  -1.8810000e-02
  -2.1140000e-02
  -3.6900000e-02
  -3.6770000e-02
  -2.5220000e-02
  -2.4400000e-03
   4.4060000e-02
   5.5710000e-02
   4.3270000e-02
   3.2680000e-02
   1.6920000e-02
   7.0700000e-03
  -7.0500000e-03
  -1.5160000e-02
   6.2000000e-03
   8.0000000e-04
  -6.3100000e-03
  -2.7360000e-02
  -1.4590000e-02
  -1.9550000e-02
  -4.4770000e-02
   3.9200000e-03
   6.9560000e-02
   4.0850000e-02
   1.6480000e-02
   5.4860000e-02
   3.1230000e-02
  -4.9300000e-02
  -7.0410000e-02
  -1.2390000e-02
   4.7080000e-02
   3.2240000e-02
   1.2670000e-02
   6.8660000e-02
   4.6610000e-02
  -3.0930000e-02
  -6.0100000e-02
  -2.3060000e-02
   2.5170000e-02
   1.5410000e-02
   1.1320000e-02
   1.0016000e-01
   1.4405000e-01
   4.1350000e-02
   2.2500000e-03
   2.9670000e-02
  -4.1000000e-04
  -2.2670000e-02
  -3.0980000e-02
   4.8500000e-03
   2.7990000e-02
  -3.8110000e-02
  -8.7930000e-02
  -4.4770000e-02
   7.5700000e-03
  -1.1100000e-02
   3.3640000e-02
   8.0440000e-02
   8.5820000e-02
   6.0130000e-02
   1.2940000e-02
   4.7130000e-02
   3.8470000e-02
  -1.7520000e-02
  -8.7500000e-03
  -2.3110000e-02
  -9.7600000e-03
  -6.8960000e-02
  -1.1091000e-01
  -6.0700000e-02
  -2.8790000e-02
  -1.5930000e-02
   2.2070000e-02
   8.3320000e-02
   9.0370000e-02
   5.1930000e-02
   3.3610000e-02
   1.0970000e-02
  -8.4400000e-03
  -1.5820000e-02
  -3.1640000e-02
   5.0640000e-02
   5.9630000e-02
  -2.0180000e-02
  -2.3550000e-02
  -1.4390000e-02
  -8.2390000e-02
  -9.8650000e-02
   9.3500000e-03
   6.8600000e-02
   8.0340000e-02
   1.2925000e-01
   1.1943000e-01
   7.0330000e-02
  -2.5500000e-03
  -3.7650000e-02
  -5.7470000e-02
  -4.5190000e-02
   3.6500000e-03
  -1.0670000e-02
   2.5250000e-02
   2.7230000e-02
  -2.4270000e-02
  -9.0800000e-03
   5.1000000e-03
  -3.9500000e-03
   1.2720000e-02
   4.9630000e-02
   3.5560000e-02
  -1.2100000e-03
  -1.8670000e-02
  -6.6190000e-02
  -5.9800000e-02
  -6.5560000e-02
  -3.4440000e-02
   5.8320000e-02
   1.0032000e-01
   1.1579000e-01
   1.2237000e-01
   6.1090000e-02
  -1.8730000e-02
  -8.6830000e-02
  -1.3948000e-01
  -6.9090000e-02
  -4.5500000e-03
  -2.5250000e-02
   5.8780000e-02
   1.1414000e-01
   6.0300000e-03
  -1.2940000e-02
  -1.3740000e-02
  -2.1630000e-02
   3.6990000e-02
   5.5170000e-02
   5.2450000e-02
   1.4392000e-01
   1.0929000e-01
  -2.4510000e-02
  -2.3200000e-02
  -3.3530000e-02
  -1.1428000e-01
  -9.2870000e-02
  -2.2020000e-02
   3.3610000e-02
   5.2260000e-02
   1.7380000e-02
   6.5090000e-02
   4.0390000e-02
  -2.6050000e-02
  -1.0800000e-02
   3.3610000e-02
   7.9400000e-02
   6.5780000e-02
  -1.8600000e-03
   4.3900000e-03
   2.6000000e-03
  -7.9650000e-02
  -1.0164000e-01
  -1.3630000e-02
   1.3930000e-02
   9.5700000e-03
   3.7650000e-02
   3.6800000e-02
   3.7150000e-02
  -3.8000000e-04
  -5.5490000e-02
   2.1300000e-02
   4.2580000e-02
   1.1350000e-02
   5.8650000e-02
   3.9730000e-02
  -2.4460000e-02
  -5.0340000e-02
  -7.5240000e-02
  -6.5720000e-02
  -2.3360000e-02
   2.8080000e-02
   2.7450000e-02
   5.8020000e-02
   5.0450000e-02
  -1.8900000e-03
  -6.4320000e-02
  -9.6590000e-02
  -4.8010000e-02
  -3.1640000e-02
   5.6810000e-02
   1.3816000e-01
   1.4430000e-01
   1.2648000e-01
   5.1440000e-02
  -2.7500000e-02
  -5.5600000e-02
  -7.5810000e-02
  -6.5500000e-02
  -8.4200000e-03
   5.0610000e-02
   4.8940000e-02
   5.7300000e-02
   4.3760000e-02
   5.8400000e-03
   8.9900000e-03
  -5.2100000e-03
   3.1700000e-02
   7.3810000e-02
   5.8650000e-02
   4.3350000e-02
   1.9080000e-02
  -1.3050000e-02
  -5.2730000e-02
  -6.1030000e-02
  -3.4930000e-02
  -2.2180000e-02
   1.0890000e-02
   4.9960000e-02
   3.2460000e-02
   1.4500000e-02
   2.5830000e-02
  -1.3300000e-02
  -3.8190000e-02
   1.7000000e-03
   4.8890000e-02
   4.4230000e-02
   5.0420000e-02
   5.0070000e-02
  -8.9400000e-03
  -5.5990000e-02
  -8.7960000e-02
  -8.6890000e-02
  -3.0210000e-02
   2.4240000e-02
   4.4720000e-02
   3.8820000e-02
   5.0720000e-02
   6.0980000e-02
  -7.9800000e-03
  -1.2340000e-02
   2.6870000e-02
  -9.1900000e-03
  -1.6970000e-02
   4.0900000e-03
  -1.6230000e-02
  -3.6330000e-02
  -2.4070000e-02
  -2.9530000e-02
   2.2320000e-02
   9.6510000e-02
   1.0553000e-01
   9.8870000e-02
   9.5250000e-02
   6.7670000e-02
  -3.5920000e-02
  -1.2264000e-01
  -1.1554000e-01
  -1.0948000e-01
  -9.3520000e-02
   4.1870000e-02
   1.6824000e-01
   1.2242000e-01
   8.5460000e-02
   6.3970000e-02
  -6.9900000e-03
  -6.1310000e-02
  -1.0542000e-01
  -8.2230000e-02
   7.5400000e-03
   2.6840000e-02
   1.2370000e-02
   5.5820000e-02
   5.1980000e-02
   2.3720000e-02
  -9.7900000e-03
  -1.5440000e-02
   1.2750000e-02
   5.1600000e-02
  -8.9900000e-03
  -3.1390000e-02
   1.6500000e-03
  -6.0590000e-02
  -6.1530000e-02
  -1.5570000e-02
   2.1580000e-02
   5.4120000e-02
   1.0466000e-01
   1.5140000e-01
   1.1754000e-01
   1.3430000e-02
  -1.9820000e-02
  -4.9380000e-02
  -1.2448000e-01
  -9.9800000e-02
  -5.7690000e-02
  -1.1320000e-02
   6.6870000e-02
   3.8520000e-02
   1.0140000e-02
   9.2370000e-02
   4.0830000e-02
  -4.9600000e-03
   1.7380000e-02
   3.8000000e-02
   4.8830000e-02
   3.3940000e-02
  -2.8410000e-02
   3.9700000e-02
   4.4310000e-02
  -8.0910000e-02
  -5.3500000e-03
   3.7320000e-02
  -3.0380000e-02
   1.8620000e-02
   2.9860000e-02
   4.3870000e-02
   6.5260000e-02
  -4.7520000e-02
  -3.2050000e-02
   2.2590000e-02
  -1.9930000e-02
  -2.5690000e-02
   7.1670000e-02
   7.0660000e-02
   4.1700000e-02
   1.5880000e-02
  -4.7380000e-02
  -3.9590000e-02
  -4.5930000e-02
  -7.3970000e-02
  -1.4590000e-02
   2.1820000e-02
   1.5680000e-02
  -1.8420000e-02
  -4.2610000e-02
  -6.9010000e-02
  -7.3010000e-02
  -5.9770000e-02
  -8.4700000e-03
   5.5030000e-02
   9.7880000e-02
   1.0967000e-01
   8.8180000e-02
   5.2120000e-02
   2.8650000e-02
  -1.3760000e-02
   9.5100000e-03
   5.0920000e-02
  -2.2040000e-02
  -3.1940000e-02
  -1.8010000e-02
  -8.1870000e-02
  -1.2086000e-01
  -7.0550000e-02
  -4.6100000e-03
   6.2980000e-02
   1.0350000e-01
   1.4811000e-01
   1.8302000e-01
   1.6070000e-01
   4.1790000e-02
  -2.7400000e-03
  -1.6340000e-02
  -4.4280000e-02
  -5.2940000e-02
  -6.8460000e-02
  -4.7820000e-02
  -2.4790000e-02
  -6.3310000e-02
  -6.5450000e-02
  -7.7600000e-03
   3.0540000e-02
   7.4030000e-02
   8.9600000e-02
   1.0523000e-01
   9.7990000e-02
   7.0460000e-02
   7.2100000e-03
   1.6450000e-02
   3.8000000e-04
  -7.4520000e-02
  -3.0870000e-02
  -3.3590000e-02
  -3.9040000e-02
  -2.0230000e-02
  -6.0510000e-02
  -5.1880000e-02
   5.2600000e-03
   4.9000000e-04
   2.7990000e-02
   6.8660000e-02
   4.1040000e-02
   4.3900000e-02
   3.8990000e-02
  -5.2000000e-04
   2.2290000e-02
   3.0740000e-02
   1.3200000e-03
   2.2510000e-02
  -5.4600000e-03
  -1.0910000e-02
  -1.5520000e-02
  -5.7610000e-02
  -4.9270000e-02
  -9.7600000e-03
  -2.8460000e-02
   1.4500000e-03
   3.8170000e-02
   2.0780000e-02
   5.2530000e-02
   5.3790000e-02
   1.5820000e-02
   4.1980000e-02
   5.9940000e-02
   1.8040000e-02
   1.8230000e-02
  -5.3500000e-03
  -3.5180000e-02
  -4.1180000e-02
  -5.9910000e-02
  -5.1050000e-02
   1.3630000e-02
   2.4130000e-02
   6.5670000e-02
   7.8550000e-02
   6.2870000e-02
   1.1532000e-01
   5.7360000e-02
  -1.8040000e-02
  -1.1730000e-02
  -3.0130000e-02
  -7.8660000e-02
  -8.2750000e-02
  -7.6030000e-02
  -4.5620000e-02
  -1.6290000e-02
  -6.1400000e-03
   2.4790000e-02
   9.3410000e-02
   1.0394000e-01
   1.1938000e-01
   8.5380000e-02
   7.2900000e-03
  -1.1410000e-02
  -5.0200000e-02
  -9.5250000e-02
  -9.2120000e-02
  -7.3890000e-02
  -3.8690000e-02
   2.1140000e-02
   1.4090000e-02
   5.4000000e-03
   7.4440000e-02
   8.6120000e-02
   4.7650000e-02
   7.8640000e-02
   9.2620000e-02
   6.3090000e-02
   1.3130000e-02
  -1.1800000e-03
  -2.4730000e-02
  -7.3620000e-02
  -9.7420000e-02
  -7.0740000e-02
   5.8100000e-03
   1.4610000e-02
   6.7280000e-02
   1.3745000e-01
   1.2357000e-01
   1.0438000e-01
   7.1970000e-02
  -1.8600000e-03
  -3.5400000e-02
  -7.9160000e-02
  -9.1080000e-02
  -9.8160000e-02
  -9.0700000e-02
  -5.4530000e-02
  -3.6600000e-02
  -3.1800000e-03
   7.3400000e-02
   7.8740000e-02
   4.8310000e-02
   8.9110000e-02
   7.8280000e-02
   1.2910000e-02
   4.6600000e-03
  -7.0700000e-03
  -6.7150000e-02
  -7.2660000e-02
  -9.5000000e-02
  -1.0265000e-01
  -1.5300000e-02
   1.6010000e-02
   1.0800000e-02
   8.2780000e-02
   1.0422000e-01
   1.0795000e-01
   6.1550000e-02
  -2.6490000e-02
  -2.9500000e-02
  -3.0380000e-02
  -4.8640000e-02
  -6.9830000e-02
  -2.3220000e-02
   4.0500000e-02
   7.5700000e-03
   2.1400000e-03
   5.9420000e-02
   6.5530000e-02
   2.4700000e-03
  -1.2310000e-02
   6.2490000e-02
   3.5040000e-02
  -9.5100000e-03
  -7.7600000e-03
   8.0900000e-03
   5.4890000e-02
  -1.0670000e-02
  -8.7500000e-03
   6.4460000e-02
   5.8510000e-02
   4.9160000e-02
   4.1760000e-02
   3.4570000e-02
   2.9260000e-02
  -6.0050000e-02
  -9.7060000e-02
  -3.5700000e-02
  -8.1200000e-03
  -2.8950000e-02
   4.2550000e-02
   1.1527000e-01
   1.1003000e-01
   8.0120000e-02
   1.5130000e-02
   1.0390000e-02
  -2.4760000e-02
  -8.7030000e-02
  -6.8710000e-02
  -4.7950000e-02
  -4.9760000e-02
  -2.1690000e-02
  -2.1410000e-02
  -2.1100000e-03
   3.6630000e-02
   1.5220000e-02
   1.9440000e-02
   8.7110000e-02
   8.9220000e-02
   7.1180000e-02
   7.2850000e-02
   1.8950000e-02
  -3.7320000e-02
  -9.4540000e-02
  -1.3624000e-01
  -7.1890000e-02
  -3.0130000e-02
  -4.8830000e-02
   4.5570000e-02
   1.2566000e-01
   6.3660000e-02
   6.5720000e-02
   6.4100000e-02
   5.0340000e-02
   2.7910000e-02
  -4.7870000e-02
  -2.6810000e-02
   1.6890000e-02
  -4.1040000e-02
  -9.4210000e-02
  -1.4260000e-02
  -1.6180000e-02
  -3.1450000e-02
   4.6640000e-02
   6.0840000e-02
   7.6410000e-02
   5.5740000e-02
   3.7040000e-02
   6.5120000e-02
   4.0610000e-02
  -2.1360000e-02
   1.1490000e-02
   2.0670000e-02
  -6.4020000e-02
  -5.4510000e-02
   4.0300000e-03
  -1.2560000e-02
   1.6970000e-02
   1.6730000e-02
   4.4750000e-02
   6.9070000e-02
   1.0170000e-02
   1.9580000e-02
   3.9180000e-02
   2.0340000e-02
  -3.4490000e-02
  -3.4550000e-02
  -2.1880000e-02
   4.3900000e-03
  -3.2160000e-02
  -7.3180000e-02
   1.6700000e-03
   1.3080000e-02
  -2.5690000e-02
   3.3560000e-02
   6.9720000e-02
   8.4910000e-02
   6.6900000e-02
   2.3140000e-02
   3.3310000e-02
   2.6000000e-03
  -5.9850000e-02
  -5.4970000e-02
  -2.3030000e-02
   9.1900000e-03
   7.5430000e-02
   4.0990000e-02
   4.0280000e-02
   9.4260000e-02
  -2.2150000e-02
  -4.8230000e-02
   2.7640000e-02
  -1.9330000e-02
   7.7000000e-03
   5.2940000e-02
   2.5580000e-02
   2.0290000e-02
  -4.6600000e-03
  -8.1570000e-02
  -5.5410000e-02
   7.2700000e-03
  -1.2010000e-02
   1.4560000e-02
   7.3040000e-02
   5.7610000e-02
   2.4100000e-02
  -2.1820000e-02
  -4.1620000e-02
  -5.7080000e-02
  -7.8580000e-02
  -1.3080000e-02
   2.2840000e-02
   1.7270000e-02
   5.8620000e-02
   7.8830000e-02
   5.1630000e-02
   3.3180000e-02
   1.4260000e-02
  -1.4000000e-03
  -8.3600000e-03
  -4.8480000e-02
  -4.8450000e-02
  -1.8340000e-02
  -2.1110000e-02
   1.5160000e-02
   4.2000000e-02
   2.4370000e-02
   3.8220000e-02
   4.0060000e-02
  -3.0000000e-05
   4.9000000e-04
   1.0970000e-02
  -3.4350000e-02
  -4.8010000e-02
   7.3800000e-03
   2.3600000e-03
   2.1030000e-02
   6.7370000e-02
   5.6230000e-02
   2.9090000e-02
   2.8160000e-02
   1.0700000e-03
  -2.9780000e-02
  -8.6400000e-03
   4.9220000e-02
   6.9560000e-02
   3.6600000e-02
   4.5080000e-02
   1.4560000e-02
  -1.8320000e-02
  -2.0150000e-02
  -2.9310000e-02
  -3.2350000e-02
  -1.8100000e-03
  -7.2400000e-03
  -4.0660000e-02
   1.2120000e-02
   2.4920000e-02
   2.2400000e-02
   5.7220000e-02
   5.0500000e-02
   4.2850000e-02
   4.2580000e-02
   3.0160000e-02
  -9.2100000e-03
  -4.3130000e-02
  -6.3060000e-02
  -4.6580000e-02
  -4.1920000e-02
  -6.6980000e-02
  -1.2260000e-02
   1.3000000e-02
   8.6900000e-03
   6.6460000e-02
   7.3070000e-02
   6.9370000e-02
   5.7720000e-02
  -4.6100000e-03
  -2.1910000e-02
  -1.0560000e-02
  -3.0870000e-02
  -7.9460000e-02
  -5.9520000e-02
  -1.4040000e-02
   2.1060000e-02
   4.8300000e-03
  -7.1000000e-04
   1.0493000e-01
   8.0470000e-02
  -3.8470000e-02
   7.4900000e-03
   4.1950000e-02
  -4.4550000e-02
  -3.8710000e-02
   1.6510000e-02
   5.7410000e-02
   7.5350000e-02
   1.2200000e-02
   1.1490000e-02
   7.6690000e-02
  -2.4100000e-03
  -5.5030000e-02
   2.2670000e-02
   6.3170000e-02
   2.1910000e-02
  -3.4520000e-02
  -2.2180000e-02
   1.0500000e-02
  -7.3340000e-02
  -1.0572000e-01
   3.7860000e-02
   8.1950000e-02
   2.9670000e-02
   5.7740000e-02
   1.0364000e-01
   7.6390000e-02
  -3.4800000e-03
  -3.9350000e-02
  -2.6300000e-03
  -1.4180000e-02
  -7.4330000e-02
  -3.3090000e-02
   3.7340000e-02
   3.6200000e-03
  -2.1960000e-02
  -5.2400000e-03
   1.3630000e-02
   1.8970000e-02
   3.4800000e-03
   2.8620000e-02
   8.0770000e-02
   5.6540000e-02
   2.0510000e-02
   2.4650000e-02
  -5.0000000e-05
   2.4100000e-03
  -3.0700000e-03
  -3.5560000e-02
   3.6770000e-02
   2.8710000e-02
  -3.2900000e-02
  -1.6810000e-02
  -1.7580000e-02
  -5.3330000e-02
  -5.2150000e-02
   1.3240000e-02
   5.7930000e-02
   5.8020000e-02
   5.2860000e-02
   6.2600000e-02
   4.6970000e-02
  -1.7220000e-02
  -5.7220000e-02
  -6.3830000e-02
  -4.1400000e-02
  -2.6730000e-02
  -2.6050000e-02
   2.7500000e-02
   6.0510000e-02
   1.6070000e-02
  -4.6300000e-03
   2.9360000e-02
   7.5100000e-03
  -3.8390000e-02
   1.6070000e-02
   3.6440000e-02
   4.1680000e-02
   7.8740000e-02
   1.0750000e-02
  -4.3790000e-02
  -3.0020000e-02
  -4.8230000e-02
  -3.1260000e-02
   4.0250000e-02
   6.8820000e-02
   6.6710000e-02
   7.0160000e-02
   2.7880000e-02
  -3.4110000e-02
  -4.3900000e-02
  -4.7080000e-02
  -5.6320000e-02
  -3.3290000e-02
   3.7320000e-02
   3.0790000e-02
   9.2400000e-03
   2.0810000e-02
  -8.2000000e-03
  -1.8340000e-02
  -2.8000000e-03
   2.4180000e-02
   7.6500000e-02
   1.3339000e-01
   1.1867000e-01
   5.3300000e-02
  -2.7000000e-04
  -4.9570000e-02
  -1.1321000e-01
  -1.0962000e-01
  -3.5750000e-02
   3.1640000e-02
   2.8680000e-02
   5.4400000e-02
   2.4980000e-02
  -4.5800000e-03
   1.8370000e-02
   2.1800000e-02
   5.6920000e-02
   1.6344000e-01
   1.2453000e-01
   9.0500000e-03
   4.6640000e-02
  -3.6900000e-02
  -1.8340000e-01
  -1.4699000e-01
  -9.1380000e-02
  -7.1480000e-02
  -4.9000000e-04
   3.3230000e-02
   6.9810000e-02
   9.4210000e-02
   3.1040000e-02
   6.5500000e-03
   4.6040000e-02
   3.6270000e-02
  -6.9900000e-03
   1.9710000e-02
   3.7370000e-02
   1.9600000e-02
  -3.4050000e-02
  -2.5750000e-02
  -2.1900000e-03
  -4.7840000e-02
  -2.8650000e-02
  -1.3680000e-02
  -8.8000000e-03
   1.5000000e-02
  -1.2230000e-02
  -4.0740000e-02
   3.3200000e-02
   3.7890000e-02
  -1.3220000e-02
   5.7170000e-02
   1.0164000e-01
   8.1350000e-02
   8.7740000e-02
   8.7050000e-02
   3.9320000e-02
  -4.2360000e-02
  -1.1058000e-01
  -8.6260000e-02
  -6.7830000e-02
  -8.5190000e-02
  -5.1770000e-02
   1.3540000e-02
   6.2210000e-02
   2.7120000e-02
  -2.0800000e-03
   8.5570000e-02
   1.1483000e-01
  -1.6620000e-02
   1.5900000e-02
   1.3383000e-01
   3.4710000e-02
  -4.1020000e-02
   6.5000000e-03
   6.8000000e-03
  -2.8760000e-02
  -6.9290000e-02
  -5.6040000e-02
  -2.5800000e-03
   0.0000000e+00
  -3.3420000e-02
   3.1640000e-02
   8.2560000e-02
   5.6150000e-02
   2.6430000e-02
   1.6150000e-02
   5.4860000e-02
   6.1690000e-02
   4.7700000e-03
  -1.7000000e-03
   4.2200000e-03
  -6.1660000e-02
  -8.4040000e-02
  -6.3360000e-02
  -2.6130000e-02
   2.0950000e-02
   4.6500000e-02
   4.9490000e-02
   8.3790000e-02
   5.3140000e-02
  -3.3400000e-02
  -2.1220000e-02
  -1.7660000e-02
  -1.5350000e-02
   2.3000000e-03
   2.0340000e-02
   4.9760000e-02
   1.9740000e-02
  -9.2900000e-03
  -1.2910000e-02
  -2.5200000e-03
   1.4200000e-02
   3.6880000e-02
   5.4210000e-02
   3.7810000e-02
  -8.9100000e-03
  -4.7730000e-02
  -7.8360000e-02
  -5.9200000e-02
  -9.4000000e-03
   4.0880000e-02
   9.6730000e-02
   9.7280000e-02
   6.8380000e-02
   2.8080000e-02
  -4.6470000e-02
  -1.1894000e-01
  -1.1993000e-01
  -5.7470000e-02
  -2.0840000e-02
   2.6240000e-02
   9.9250000e-02
   9.5220000e-02
   7.0270000e-02
   4.7630000e-02
  -1.8730000e-02
  -4.8970000e-02
  -5.1800000e-03
  -6.2800000e-03
   8.7500000e-03
   3.9560000e-02
   1.6590000e-02
   3.4500000e-03
  -1.1460000e-02
  -5.5080000e-02
  -4.1130000e-02
  -4.9900000e-03
   2.0590000e-02
   4.8580000e-02
   5.8210000e-02
   4.7300000e-02
   4.1680000e-02
   2.0300000e-03
  -1.1520000e-02
   4.3790000e-02
   3.0210000e-02
   1.8670000e-02
   4.7300000e-02
   1.9550000e-02
  -4.5800000e-03
  -4.4230000e-02
  -5.2640000e-02
  -3.2130000e-02
  -1.5050000e-02
   1.6620000e-02
   5.0860000e-02
   7.8960000e-02
   5.6370000e-02
   2.5030000e-02
   4.2200000e-03
  -1.3130000e-02
  -1.4070000e-02
  -3.2160000e-02
   3.4270000e-02
   6.0900000e-02
  -2.1960000e-02
  -1.3490000e-02
   6.8300000e-03
  -1.7710000e-02
  -2.6510000e-02
  -9.0500000e-03
   2.8570000e-02
   1.1320000e-02
  -5.7000000e-03
   3.2600000e-03
   1.7710000e-02
   9.2400000e-03
  -1.9880000e-02
  -6.7700000e-03
  -1.5270000e-02
   2.4510000e-02
   4.7900000e-02
   2.0650000e-02
   3.5840000e-02
   1.4090000e-02
  -3.4900000e-02
  -2.2650000e-02
  -2.7940000e-02
  -2.8410000e-02
  -1.2720000e-02
  -2.7830000e-02
  -1.3570000e-02
   3.2710000e-02
   2.0100000e-02
  -2.0600000e-03
   4.6940000e-02
   8.5980000e-02
   7.1070000e-02
   5.1380000e-02
   6.5450000e-02
   3.8080000e-02
  -5.0390000e-02
  -9.8130000e-02
  -3.5810000e-02
  -4.0630000e-02
  -6.1280000e-02
  -5.9200000e-03
   4.9460000e-02
   8.4170000e-02
   2.4160000e-02
  -1.7030000e-02
   3.9920000e-02
   3.6820000e-02
  -1.8230000e-02
   2.4100000e-02
   6.4430000e-02
   4.2060000e-02
   2.2950000e-02
  -8.6400000e-03
  -2.5200000e-02
  -2.1440000e-02
  -6.0570000e-02
  -3.3480000e-02
   2.0120000e-02
   3.7070000e-02
   8.0910000e-02
   7.0110000e-02
   5.6950000e-02
   4.2420000e-02
  -7.0500000e-03
  -1.9850000e-02
   6.6000000e-04
  -2.7830000e-02
  -6.8600000e-02
  -3.2960000e-02
  -1.5930000e-02
  -3.8800000e-02
  -6.7400000e-03
   5.6540000e-02
   1.2234000e-01
   1.0967000e-01
   8.3710000e-02
   1.1466000e-01
   3.7920000e-02
  -5.9090000e-02
  -1.0778000e-01
  -1.3564000e-01
  -1.1431000e-01
  -7.9730000e-02
  -3.5840000e-02
   4.5270000e-02
   8.4310000e-02
   7.2770000e-02
   9.8950000e-02
   9.4780000e-02
   3.9400000e-02
   5.8590000e-02
   3.6080000e-02
  -3.4300000e-03
   2.5420000e-02
  -2.4980000e-02
  -1.0128000e-01
  -9.3140000e-02
  -6.6630000e-02
  -9.4950000e-02
  -4.2470000e-02
   2.8430000e-02
   7.1810000e-02
   1.1757000e-01
   7.0140000e-02
   7.5760000e-02
   5.0670000e-02
  -4.2640000e-02
  -3.3090000e-02
  -1.1950000e-02
   1.7490000e-02
   2.6680000e-02
   1.8700000e-02
   3.6000000e-02
   3.2600000e-03
  -7.9950000e-02
  -8.5460000e-02
  -3.0160000e-02
  -5.2600000e-03
   1.1710000e-02
   8.1790000e-02
   9.0620000e-02
   6.6900000e-02
   3.7540000e-02
  -3.4500000e-03
   1.2910000e-02
  -8.0900000e-03
  -2.6210000e-02
  -7.6800000e-03
  -5.3700000e-03
  -1.2560000e-02
  -4.7520000e-02
  -3.2380000e-02
  -1.4700000e-02
  -1.0750000e-02
  -2.3000000e-03
   5.9660000e-02
   1.2212000e-01
   1.0317000e-01
   1.1307000e-01
   5.8810000e-02
  -3.3830000e-02
  -4.1920000e-02
  -7.8800000e-02
  -9.1270000e-02
  -4.2170000e-02
  -1.5300000e-02
   4.2310000e-02
   5.6180000e-02
   2.9200000e-02
   7.1310000e-02
   6.2430000e-02
  -1.0470000e-02
   1.7110000e-02
   5.8320000e-02
   1.1160000e-02
   6.1100000e-03
   4.1020000e-02
   4.9100000e-03
  -2.2540000e-02
  -6.0840000e-02
  -2.9910000e-02
   1.6750000e-02
  -3.7810000e-02
  -2.3000000e-02
   4.2220000e-02
   3.0210000e-02
   4.4000000e-04
   2.6400000e-02
   4.7100000e-02
   5.9830000e-02
   3.6990000e-02
  -1.2780000e-02
   8.0000000e-04
  -2.8080000e-02
  -7.6470000e-02
  -5.1820000e-02
  -6.6790000e-02
  -2.7200000e-02
   1.8700000e-02
   1.1760000e-02
   6.6270000e-02
   8.7330000e-02
   6.4080000e-02
   5.7030000e-02
   5.9960000e-02
  -1.1270000e-02
  -4.2110000e-02
  -2.1000000e-02
  -7.2110000e-02
  -6.4270000e-02
  -4.0990000e-02
  -3.4930000e-02
  -1.7520000e-02
  -1.5100000e-03
   1.9300000e-02
   7.0900000e-02
   4.6560000e-02
   1.9710000e-02
   6.3340000e-02
   4.7130000e-02
   1.0010000e-02
   3.7650000e-02
   3.6300000e-02
   4.7700000e-03
   7.7000000e-03
   3.6200000e-03
   9.0200000e-03
  -5.4600000e-03
  -4.3760000e-02
  -3.2190000e-02
  -1.4700000e-02
  -2.7530000e-02
  -5.1190000e-02
   1.3700000e-03
   5.3160000e-02
   1.9930000e-02
   3.9840000e-02
   1.0572000e-01
   9.6270000e-02
   6.3560000e-02
   4.6720000e-02
   3.5560000e-02
   1.3270000e-02
  -2.9720000e-02
  -5.8890000e-02
  -7.1040000e-02
  -6.6870000e-02
  -6.5910000e-02
  -6.4820000e-02
  -2.7000000e-04
   2.6070000e-02
   4.5190000e-02
   7.9320000e-02
   1.1705000e-01
   1.1787000e-01
   8.0010000e-02
   5.1110000e-02
   7.9500000e-03
  -2.5030000e-02
  -7.9020000e-02
  -7.6440000e-02
  -5.2480000e-02
  -4.4940000e-02
  -4.4660000e-02
   2.0300000e-03
   1.2450000e-02
  -1.0560000e-02
   8.4400000e-03
   4.2220000e-02
   5.6780000e-02
   6.5970000e-02
   7.9950000e-02
   6.5310000e-02
   2.4540000e-02
  -1.5410000e-02
  -6.0240000e-02
  -6.2430000e-02
  -4.2740000e-02
  -4.1790000e-02
  -3.5180000e-02
  -4.5760000e-02
   2.3000000e-03
   1.2310000e-02
   1.8560000e-02
   4.3320000e-02
   3.4820000e-02
   4.5430000e-02
   4.3650000e-02
   6.5910000e-02
   4.5760000e-02
   3.6160000e-02
   2.1610000e-02
  -8.2090000e-02
  -5.2040000e-02
  -5.2230000e-02
  -8.4610000e-02
  -3.4850000e-02
   4.2850000e-02
   5.8040000e-02
   1.7580000e-02
   3.9540000e-02
   3.1280000e-02
   2.5200000e-03
  -2.6050000e-02
   2.0620000e-02
   6.7640000e-02
  -3.9800000e-03
   7.3800000e-03
   3.6690000e-02
   1.7580000e-02
   3.2440000e-02
  -3.5950000e-02
  -2.1550000e-02
   4.1370000e-02
  -1.7580000e-02
  -3.0540000e-02
   6.0430000e-02
   5.5490000e-02
   1.9740000e-02
   5.2530000e-02
   2.0400000e-02
   2.8950000e-02
   1.7990000e-02
  -4.6640000e-02
   1.3930000e-02
   2.2650000e-02
  -5.5220000e-02
  -4.0880000e-02
   4.4700000e-03
   4.0360000e-02
   2.8760000e-02
   5.3160000e-02
   7.9240000e-02
   5.2370000e-02
   5.8900000e-03
  -4.5710000e-02
  -3.6880000e-02
  -3.9020000e-02
  -4.7650000e-02
  -5.8900000e-03
   5.3600000e-02
   3.9480000e-02
  -1.8840000e-02
  -2.1360000e-02
   1.8600000e-03
   3.7600000e-03
  -5.9500000e-03
   2.2150000e-02
   9.8980000e-02
   6.3030000e-02
  -1.4300000e-03
  -1.2610000e-02
  -2.6300000e-03
  -4.3160000e-02
  -7.9320000e-02
  -3.5420000e-02
   8.1200000e-03
   2.9120000e-02
  -3.9590000e-02
  -3.2900000e-02
  -3.0000000e-04
  -3.8850000e-02
  -4.2060000e-02
   4.9980000e-02
   1.2601000e-01
   1.0918000e-01
   7.8030000e-02
   8.8890000e-02
   3.7070000e-02
  -5.5880000e-02
  -8.8670000e-02
  -9.6370000e-02
  -6.9810000e-02
  -5.2340000e-02
  -4.4550000e-02
  -6.7700000e-03
   3.4600000e-02
   1.7820000e-02
   5.1880000e-02
   6.6240000e-02
   8.5930000e-02
   1.2078000e-01
   8.8640000e-02
   9.6070000e-02
   4.7870000e-02
  -3.8880000e-02
  -6.6000000e-02
  -9.2620000e-02
  -1.2357000e-01
  -8.6670000e-02
  -1.4920000e-02
   1.2860000e-02
   5.0970000e-02
   7.6110000e-02
   5.9470000e-02
   5.4750000e-02
   1.4280000e-02
  -9.8400000e-03
   8.3400000e-03
  -2.9100000e-03
   6.6100000e-03
   3.5290000e-02
   3.9500000e-03
  -2.8980000e-02
   1.1800000e-03
   1.3410000e-02
   2.4510000e-02
   5.3160000e-02
   5.3250000e-02
   3.9430000e-02
  -1.2720000e-02
  -5.7690000e-02
  -4.4940000e-02
  -5.1080000e-02
  -4.6560000e-02
  -5.8400000e-03
   2.5660000e-02
   5.6150000e-02
   3.7320000e-02
   8.2300000e-03
   1.9740000e-02
   3.8520000e-02
   1.7930000e-02
   3.2440000e-02
   8.5540000e-02
   4.2530000e-02
   1.3930000e-02
  -2.1910000e-02
  -7.7180000e-02
  -5.9390000e-02
  -8.9600000e-02
  -8.4860000e-02
   2.5250000e-02
   7.0350000e-02
   3.2680000e-02
   6.0980000e-02
   1.0309000e-01
   6.2400000e-02
   1.1270000e-02
  -1.9700000e-03
   6.2870000e-02
   2.4760000e-02
  -5.8810000e-02
  -3.9350000e-02
  -5.1520000e-02
  -7.0900000e-02
  -7.8060000e-02
  -6.5720000e-02
   4.6120000e-02
   7.7890000e-02
   2.0340000e-02
   6.5560000e-02
   9.9310000e-02
   3.0930000e-02
  -4.0280000e-02
  -2.4270000e-02
  -4.1430000e-02
  -9.5400000e-03
   4.1700000e-03
  -9.7300000e-03
   7.8090000e-02
   7.7070000e-02
  -1.5030000e-02
   3.0000000e-04
   1.6510000e-02
  -6.7700000e-03
  -4.1480000e-02
  -3.6630000e-02
   1.2300000e-03
   6.3000000e-04
  -3.2050000e-02
  -3.2380000e-02
   2.5550000e-02
   2.7230000e-02
   3.6770000e-02
   7.7130000e-02
   8.3570000e-02
   7.8660000e-02
   1.3270000e-02
  -1.7360000e-02
   1.0400000e-03
  -1.5220000e-02
  -7.3340000e-02
  -2.2180000e-02
   3.2550000e-02
  -2.3110000e-02
  -2.9390000e-02
  -1.9990000e-02
   3.5200000e-02
   4.2420000e-02
  -2.6000000e-03
   6.8190000e-02
   1.4000000e-01
   3.0430000e-02
  -1.7850000e-02
   6.6900000e-03
  -2.1610000e-02
  -3.6930000e-02
  -2.1170000e-02
   6.2200000e-03
   6.4240000e-02
  -5.8700000e-03
  -3.7510000e-02
   1.3820000e-02
  -2.0430000e-02
  -5.3900000e-02
  -7.5100000e-03
   5.1000000e-03
   2.7750000e-02
   2.7770000e-02
  -1.8260000e-02
   6.2490000e-02
   7.0460000e-02
  -1.1490000e-02
   1.4450000e-02
   3.0000000e-02
  -1.5050000e-02
  -2.7880000e-02
  -2.1440000e-02
  -7.6200000e-03
  -2.4700000e-03
  -2.3720000e-02
   6.9400000e-03
   6.2840000e-02
   1.9740000e-02
   9.3200000e-03
   3.5780000e-02
   4.1100000e-03
  -2.6490000e-02
  -7.8140000e-02
  -6.5750000e-02
   2.0320000e-02
  -6.8000000e-03
  -6.0000000e-03
   1.0035000e-01
   9.5990000e-02
   3.5950000e-02
   4.4640000e-02
   1.5350000e-02
  -2.6730000e-02
  -7.5070000e-02
  -8.4860000e-02
  -2.4320000e-02
  -1.4860000e-02
  -1.1320000e-02
   4.2800000e-02
   5.0750000e-02
   1.8010000e-02
   1.2830000e-02
   5.4260000e-02
   5.7800000e-02
   4.3460000e-02
   1.5330000e-02
   3.0520000e-02
   4.0360000e-02
  -4.0440000e-02
  -4.7600000e-02
  -2.3690000e-02
  -1.7000000e-02
   1.1570000e-02
   2.8510000e-02
   6.7450000e-02
   5.4560000e-02
  -6.1700000e-03
