# Supplementary material for: A Novel Classification Method for Flutter Signals Based on the CNN and STFT
Source: Hindawi journal article supplement (doi:10.1155/2019/9375437), 2019-04-09
Supplement: f1 [file 9375437.f1.zip › 00_25_z15.0_33channel.txt]

  -1.0000000e-05
  -1.0000000e-05
  -1.0000000e-05
  -1.0000000e-05
  -1.0000000e-05
  -1.0000000e-05
  -1.0000000e-05
  -1.0000000e-05
  -1.0000000e-05
  -1.0000000e-05
  -1.0000000e-05
  -1.0000000e-05
  -1.0000000e-05
  -1.0000000e-05
  -1.0000000e-05
  -1.0000000e-05
  -1.0000000e-05
  -1.0000000e-05
  -1.0000000e-05
  -1.0000000e-05
  -1.0000000e-05
  -1.0000000e-05
  -1.0000000e-05
  -1.0000000e-05
  -1.0000000e-05
  -1.0000000e-05
  -1.0000000e-05
  -1.0000000e-05
  -1.0000000e-05
  -1.0000000e-05
  -1.0000000e-05
  -1.0000000e-05
  -1.0000000e-05
  -1.0000000e-05
  -1.0000000e-05
  -1.0000000e-05
  -1.0000000e-05
  -1.0000000e-05
  -1.0000000e-05
  -1.0000000e-05
  -1.0000000e-05
  -1.0000000e-05
  -1.0000000e-05
  -1.0000000e-05
  -1.0000000e-05
  -1.0000000e-05
  -1.0000000e-05
  -1.0000000e-05
  -1.0000000e-05
  -1.0000000e-05
  -1.0000000e-05
  -1.0000000e-05
  -1.0000000e-05
  -1.0000000e-05
  -1.0000000e-05
  -1.0000000e-05
  -1.0000000e-05
  -1.0000000e-05
  -1.0000000e-05
  -1.0000000e-05
  -1.0000000e-05
  -1.0000000e-05
  -1.0000000e-05
  -1.0000000e-05
  -1.0000000e-05
  -1.0000000e-05
  -1.0000000e-05
  -1.0000000e-05
  -1.0000000e-05
  -1.0000000e-05
  -1.0000000e-05
  -1.0000000e-05
  -1.0000000e-05
  -1.0000000e-05
  -1.0000000e-05
  -1.0000000e-05
  -1.0000000e-05
  -1.0000000e-05
  -1.0000000e-05
  -1.0000000e-05
  -1.0000000e-05
  -1.0000000e-05
  -1.0000000e-05
  -1.0000000e-05
  -1.0000000e-05
  -1.0000000e-05
  -1.0000000e-05
  -1.0000000e-05
  -1.0000000e-05
  -1.0000000e-05
  -1.0000000e-05
  -1.0000000e-05
  -1.0000000e-05
  -1.0000000e-05
  -1.0000000e-05
  -1.0000000e-05
  -1.0000000e-05
  -1.0000000e-05
  -1.0000000e-05
  -1.0000000e-05
  -1.0000000e-05
  -1.0000000e-05
  -1.0000000e-05
  -1.0000000e-05
  -1.0000000e-05
  -1.0000000e-05
  -1.0000000e-05
  -1.0000000e-05
  -1.0000000e-05
  -1.0000000e-05
  -1.0000000e-05
  -1.0000000e-05
  -1.0000000e-05
  -1.0000000e-05
  -1.0000000e-05
  -1.0000000e-05
  -1.0000000e-05
  -1.0000000e-05
  -1.0000000e-05
  -1.0000000e-05
  -1.0000000e-05
  -1.0000000e-05
  -1.0000000e-05
  -1.0000000e-05
  -1.0000000e-05
  -1.0000000e-05
  -1.0000000e-05
  -1.0000000e-05
  -1.0000000e-05
  -1.0000000e-05
  -1.0000000e-05
  -1.0000000e-05
  -1.0000000e-05
  -1.0000000e-05
  -1.0000000e-05
  -1.0000000e-05
  -1.0000000e-05
  -1.0000000e-05
  -1.0000000e-05
  -1.0000000e-05
  -1.0000000e-05
  -1.0000000e-05
  -1.0000000e-05
  -1.0000000e-05
  -1.0000000e-05
  -1.0000000e-05
  -1.0000000e-05
  -1.0000000e-05
  -1.0000000e-05
  -1.0000000e-05
  -1.0000000e-05
  -1.0000000e-05
  -1.0000000e-05
  -1.0000000e-05
  -1.0000000e-05
  -1.0000000e-05
  -1.0000000e-05
  -1.0000000e-05
  -1.0000000e-05
  -1.0000000e-05
  -1.0000000e-05
  -1.0000000e-05
  -1.0000000e-05
  -1.0000000e-05
  -1.0000000e-05
  -1.0000000e-05
  -1.0000000e-05
  -1.0000000e-05
  -1.0000000e-05
  -1.0000000e-05
  -1.0000000e-05
  -1.0000000e-05
  -1.0000000e-05
  -1.0000000e-05
  -1.0000000e-05
  -1.0000000e-05
  -1.0000000e-05
  -1.0000000e-05
  -1.0000000e-05
  -1.0000000e-05
  -1.0000000e-05
  -1.0000000e-05
  -1.0000000e-05
  -1.0000000e-05
  -1.0000000e-05
  -1.0000000e-05
  -1.0000000e-05
  -1.0000000e-05
  -1.0000000e-05
  -1.0000000e-05
  -1.0000000e-05
  -1.0000000e-05
  -1.0000000e-05
  -1.0000000e-05
  -1.0000000e-05
  -1.0000000e-05
  -1.0000000e-05
  -1.0000000e-05
  -1.0000000e-05
  -1.0000000e-05
  -1.0000000e-05
  -1.0000000e-05
  -1.0000000e-05
  -1.0000000e-05
  -1.0000000e-05
  -1.0000000e-05
  -1.0000000e-05
  -1.0000000e-05
  -1.0000000e-05
  -1.0000000e-05
  -1.0000000e-05
  -1.0000000e-05
  -1.0000000e-05
  -1.0000000e-05
  -1.0000000e-05
  -1.0000000e-05
  -1.0000000e-05
  -1.0000000e-05
  -1.0000000e-05
  -1.0000000e-05
  -1.0000000e-05
  -1.0000000e-05
  -1.0000000e-05
  -1.0000000e-05
  -1.0000000e-05
  -1.0000000e-05
  -1.0000000e-05
  -1.0000000e-05
  -1.0000000e-05
  -1.0000000e-05
  -1.0000000e-05
  -1.0000000e-05
  -1.0000000e-05
  -1.0000000e-05
  -1.0000000e-05
  -1.0000000e-05
  -1.0000000e-05
  -1.0000000e-05
  -1.0000000e-05
  -1.0000000e-05
  -1.0000000e-05
  -1.0000000e-05
  -1.0000000e-05
  -1.0000000e-05
  -1.0000000e-05
  -1.0000000e-05
  -1.0000000e-05
  -1.0000000e-05
  -1.0000000e-05
  -1.0000000e-05
  -1.0000000e-05
  -1.0000000e-05
  -1.0000000e-05
  -1.0000000e-05
  -1.0000000e-05
  -1.0000000e-05
  -1.0000000e-05
  -1.0000000e-05
  -1.0000000e-05
  -1.0000000e-05
  -1.0000000e-05
  -1.0000000e-05
  -1.0000000e-05
  -1.0000000e-05
  -1.0000000e-05
  -1.0000000e-05
  -1.0000000e-05
  -1.0000000e-05
  -1.0000000e-05
  -1.0000000e-05
  -1.0000000e-05
  -1.0000000e-05
  -1.0000000e-05
  -1.0000000e-05
  -1.0000000e-05
  -1.0000000e-05
  -1.0000000e-05
  -1.0000000e-05
  -1.0000000e-05
  -1.0000000e-05
  -1.0000000e-05
  -1.0000000e-05
  -1.0000000e-05
  -1.0000000e-05
  -1.0000000e-05
  -1.0000000e-05
  -1.0000000e-05
  -1.0000000e-05
  -1.0000000e-05
  -1.0000000e-05
  -1.0000000e-05
  -1.0000000e-05
  -1.0000000e-05
  -1.0000000e-05
  -1.0000000e-05
  -1.0000000e-05
  -1.0000000e-05
  -1.0000000e-05
  -1.0000000e-05
  -1.0000000e-05
  -1.0000000e-05
  -1.0000000e-05
  -1.0000000e-05
  -1.0000000e-05
  -1.0000000e-05
  -1.0000000e-05
  -1.0000000e-05
  -1.0000000e-05
  -1.0000000e-05
  -1.0000000e-05
  -1.0000000e-05
  -1.0000000e-05
  -1.0000000e-05
  -1.0000000e-05
  -1.0000000e-05
  -1.0000000e-05
  -1.0000000e-05
  -1.0000000e-05
  -1.0000000e-05
  -1.0000000e-05
  -1.0000000e-05
  -1.0000000e-05
  -1.0000000e-05
  -1.0000000e-05
  -1.0000000e-05
  -1.0000000e-05
  -1.0000000e-05
  -1.0000000e-05
  -1.0000000e-05
  -1.0000000e-05
  -1.0000000e-05
  -1.0000000e-05
  -1.0000000e-05
  -1.0000000e-05
  -1.0000000e-05
  -1.0000000e-05
  -1.0000000e-05
  -1.0000000e-05
  -1.0000000e-05
  -1.0000000e-05
  -1.0000000e-05
  -1.0000000e-05
  -1.0000000e-05
  -1.0000000e-05
  -1.0000000e-05
  -1.0000000e-05
  -1.0000000e-05
  -1.0000000e-05
  -1.0000000e-05
  -1.0000000e-05
  -1.0000000e-05
  -1.0000000e-05
  -1.0000000e-05
  -1.0000000e-05
  -1.0000000e-05
  -1.0000000e-05
  -1.0000000e-05
  -1.0000000e-05
  -1.0000000e-05
  -1.0000000e-05
  -1.0000000e-05
  -1.0000000e-05
  -1.0000000e-05
  -1.0000000e-05
  -1.0000000e-05
  -1.0000000e-05
  -1.0000000e-05
  -1.0000000e-05
  -1.0000000e-05
  -1.0000000e-05
  -1.0000000e-05
  -1.0000000e-05
  -1.0000000e-05
  -1.0000000e-05
  -1.0000000e-05
  -1.0000000e-05
  -1.0000000e-05
  -1.0000000e-05
  -1.0000000e-05
  -1.0000000e-05
  -1.0000000e-05
  -1.0000000e-05
  -1.0000000e-05
  -1.0000000e-05
  -1.0000000e-05
  -1.0000000e-05
  -1.0000000e-05
  -1.0000000e-05
  -1.0000000e-05
  -1.0000000e-05
  -1.0000000e-05
  -1.0000000e-05
  -1.0000000e-05
  -1.0000000e-05
  -1.0000000e-05
  -1.0000000e-05
  -1.0000000e-05
  -1.0000000e-05
  -1.0000000e-05
  -1.0000000e-05
  -1.0000000e-05
  -1.0000000e-05
  -1.0000000e-05
  -1.0000000e-05
  -1.0000000e-05
  -1.0000000e-05
  -1.0000000e-05
  -1.0000000e-05
  -1.0000000e-05
  -1.0000000e-05
  -1.0000000e-05
  -1.0000000e-05
  -1.0000000e-05
  -1.0000000e-05
  -1.0000000e-05
  -1.0000000e-05
  -1.0000000e-05
  -1.0000000e-05
  -1.0000000e-05
  -1.0000000e-05
  -1.0000000e-05
  -1.0000000e-05
  -1.0000000e-05
  -1.0000000e-05
  -1.0000000e-05
  -1.0000000e-05
  -1.0000000e-05
  -1.0000000e-05
  -1.0000000e-05
  -1.0000000e-05
  -1.0000000e-05
  -1.0000000e-05
  -1.0000000e-05
  -1.0000000e-05
  -1.0000000e-05
  -1.0000000e-05
  -1.0000000e-05
  -1.0000000e-05
  -1.0000000e-05
  -1.0000000e-05
  -1.0000000e-05
  -1.0000000e-05
  -1.0000000e-05
  -1.0000000e-05
  -1.0000000e-05
  -1.0000000e-05
  -1.0000000e-05
  -1.0000000e-05
  -1.0000000e-05
  -1.0000000e-05
  -1.0000000e-05
  -1.0000000e-05
  -1.0000000e-05
  -1.0000000e-05
  -1.0000000e-05
  -1.0000000e-05
  -1.0000000e-05
  -1.0000000e-05
  -1.0000000e-05
  -1.0000000e-05
  -1.0000000e-05
  -1.0000000e-05
  -1.0000000e-05
  -1.0000000e-05
  -1.0000000e-05
  -1.0000000e-05
  -1.0000000e-05
  -1.0000000e-05
  -1.0000000e-05
  -1.0000000e-05
  -1.0000000e-05
  -1.0000000e-05
  -1.0000000e-05
  -1.0000000e-05
  -1.0000000e-05
  -1.0000000e-05
  -1.0000000e-05
  -1.0000000e-05
  -1.0000000e-05
  -1.0000000e-05
  -1.0000000e-05
  -1.0000000e-05
  -1.0000000e-05
  -1.0000000e-05
  -1.0000000e-05
  -1.0000000e-05
  -1.0000000e-05
  -1.0000000e-05
  -1.0000000e-05
  -1.0000000e-05
  -1.0000000e-05
  -1.0000000e-05
  -1.0000000e-05
  -1.0000000e-05
  -1.0000000e-05
  -1.0000000e-05
  -1.0000000e-05
  -1.0000000e-05
  -1.0000000e-05
  -1.0000000e-05
  -1.0000000e-05
  -1.0000000e-05
  -1.0000000e-05
  -1.0000000e-05
  -1.0000000e-05
  -1.0000000e-05
  -1.0000000e-05
  -1.0000000e-05
  -1.0000000e-05
  -1.0000000e-05
  -1.0000000e-05
  -1.0000000e-05
  -1.0000000e-05
  -1.0000000e-05
  -1.0000000e-05
  -1.0000000e-05
  -1.0000000e-05
  -1.0000000e-05
  -1.0000000e-05
  -1.0000000e-05
  -1.0000000e-05
  -1.0000000e-05
  -1.0000000e-05
  -1.0000000e-05
  -1.0000000e-05
  -1.0000000e-05
  -1.0000000e-05
  -1.0000000e-05
  -1.0000000e-05
  -1.0000000e-05
  -1.0000000e-05
  -1.0000000e-05
  -1.0000000e-05
  -1.0000000e-05
  -1.0000000e-05
  -1.0000000e-05
  -1.0000000e-05
  -1.0000000e-05
  -1.0000000e-05
  -1.0000000e-05
  -1.0000000e-05
  -1.0000000e-05
  -1.0000000e-05
  -1.0000000e-05
  -1.0000000e-05
  -1.0000000e-05
  -1.0000000e-05
  -1.0000000e-05
  -1.0000000e-05
  -1.0000000e-05
  -1.0000000e-05
  -1.0000000e-05
  -1.0000000e-05
  -1.0000000e-05
  -1.0000000e-05
  -1.0000000e-05
  -1.0000000e-05
  -1.0000000e-05
  -1.0000000e-05
  -1.0000000e-05
  -1.0000000e-05
  -1.0000000e-05
  -1.0000000e-05
  -1.0000000e-05
  -1.0000000e-05
  -1.0000000e-05
  -1.0000000e-05
  -1.0000000e-05
  -1.0000000e-05
  -1.0000000e-05
  -1.0000000e-05
  -1.0000000e-05
  -1.0000000e-05
  -1.0000000e-05
  -1.0000000e-05
  -1.0000000e-05
  -1.0000000e-05
  -1.0000000e-05
  -1.0000000e-05
  -1.0000000e-05
  -1.0000000e-05
  -1.0000000e-05
  -1.0000000e-05
  -1.0000000e-05
  -1.0000000e-05
  -1.0000000e-05
  -1.0000000e-05
  -1.0000000e-05
  -1.0000000e-05
  -1.0000000e-05
  -1.0000000e-05
  -1.0000000e-05
  -1.0000000e-05
  -1.0000000e-05
  -1.0000000e-05
  -1.0000000e-05
  -1.0000000e-05
  -1.0000000e-05
  -1.0000000e-05
  -1.0000000e-05
  -1.0000000e-05
  -1.0000000e-05
  -1.0000000e-05
  -1.0000000e-05
  -1.0000000e-05
  -1.0000000e-05
  -1.0000000e-05
  -1.0000000e-05
  -1.0000000e-05
  -1.0000000e-05
  -1.0000000e-05
  -1.0000000e-05
  -1.0000000e-05
  -1.0000000e-05
  -1.0000000e-05
  -1.0000000e-05
  -1.0000000e-05
  -1.0000000e-05
  -1.0000000e-05
  -1.0000000e-05
  -1.0000000e-05
  -1.0000000e-05
  -1.0000000e-05
  -1.0000000e-05
  -1.0000000e-05
  -1.0000000e-05
  -1.0000000e-05
  -1.0000000e-05
  -1.0000000e-05
  -1.0000000e-05
  -1.0000000e-05
  -1.0000000e-05
  -1.0000000e-05
  -1.0000000e-05
  -1.0000000e-05
  -1.0000000e-05
  -1.0000000e-05
  -1.0000000e-05
  -1.0000000e-05
  -1.0000000e-05
  -1.0000000e-05
  -1.0000000e-05
  -1.0000000e-05
  -1.0000000e-05
  -1.0000000e-05
  -1.0000000e-05
  -1.0000000e-05
  -1.0000000e-05
  -1.0000000e-05
  -1.0000000e-05
  -1.0000000e-05
  -1.0000000e-05
  -1.0000000e-05
  -1.0000000e-05
  -1.0000000e-05
  -1.0000000e-05
  -1.0000000e-05
  -1.0000000e-05
  -1.0000000e-05
  -1.0000000e-05
  -1.0000000e-05
  -1.0000000e-05
  -1.0000000e-05
  -1.0000000e-05
  -1.0000000e-05
  -1.0000000e-05
  -1.0000000e-05
  -1.0000000e-05
  -1.0000000e-05
  -1.0000000e-05
  -1.0000000e-05
  -1.0000000e-05
  -1.0000000e-05
  -1.0000000e-05
  -1.0000000e-05
  -1.0000000e-05
  -1.0000000e-05
  -1.0000000e-05
  -1.0000000e-05
  -1.0000000e-05
  -1.0000000e-05
  -1.0000000e-05
  -1.0000000e-05
  -1.0000000e-05
  -1.0000000e-05
  -1.0000000e-05
  -1.0000000e-05
  -1.0000000e-05
  -1.0000000e-05
  -1.0000000e-05
  -1.0000000e-05
  -1.0000000e-05
  -1.0000000e-05
  -1.0000000e-05
  -1.0000000e-05
  -1.0000000e-05
  -1.0000000e-05
  -1.0000000e-05
  -1.0000000e-05
  -1.0000000e-05
  -1.0000000e-05
  -1.0000000e-05
  -1.0000000e-05
  -1.0000000e-05
  -1.0000000e-05
  -1.0000000e-05
  -1.0000000e-05
  -1.0000000e-05
  -1.0000000e-05
  -1.0000000e-05
  -1.0000000e-05
  -1.0000000e-05
  -1.0000000e-05
  -1.0000000e-05
  -1.0000000e-05
  -1.0000000e-05
  -1.0000000e-05
  -1.0000000e-05
  -1.0000000e-05
  -1.0000000e-05
  -1.0000000e-05
  -1.0000000e-05
  -1.0000000e-05
  -1.0000000e-05
  -1.0000000e-05
  -1.0000000e-05
  -1.0000000e-05
  -1.0000000e-05
  -1.0000000e-05
  -1.0000000e-05
  -1.0000000e-05
  -1.0000000e-05
  -1.0000000e-05
  -1.0000000e-05
  -1.0000000e-05
  -1.0000000e-05
  -1.0000000e-05
  -1.0000000e-05
  -1.0000000e-05
  -1.0000000e-05
  -1.0000000e-05
  -1.0000000e-05
  -1.0000000e-05
  -1.0000000e-05
  -1.0000000e-05
  -1.0000000e-05
  -1.0000000e-05
  -1.0000000e-05
  -1.0000000e-05
  -1.0000000e-05
  -1.0000000e-05
  -1.0000000e-05
  -1.0000000e-05
  -1.0000000e-05
  -1.0000000e-05
  -1.0000000e-05
  -1.0000000e-05
  -1.0000000e-05
  -1.0000000e-05
  -1.0000000e-05
  -1.0000000e-05
  -1.0000000e-05
  -1.0000000e-05
  -1.0000000e-05
  -1.0000000e-05
  -1.0000000e-05
  -1.0000000e-05
  -1.0000000e-05
  -1.0000000e-05
  -1.0000000e-05
  -1.0000000e-05
  -1.0000000e-05
  -1.0000000e-05
  -1.0000000e-05
  -1.0000000e-05
  -1.0000000e-05
  -1.0000000e-05
  -1.0000000e-05
  -1.0000000e-05
  -1.0000000e-05
  -1.0000000e-05
  -1.0000000e-05
  -1.0000000e-05
  -1.0000000e-05
  -1.0000000e-05
  -1.0000000e-05
  -1.0000000e-05
  -1.0000000e-05
  -1.0000000e-05
  -1.0000000e-05
  -1.0000000e-05
  -1.0000000e-05
  -1.0000000e-05
  -1.0000000e-05
  -1.0000000e-05
  -1.0000000e-05
  -1.0000000e-05
  -1.0000000e-05
  -1.0000000e-05
  -1.0000000e-05
  -1.0000000e-05
  -1.0000000e-05
  -1.0000000e-05
  -1.0000000e-05
  -1.0000000e-05
  -1.0000000e-05
  -1.0000000e-05
  -1.0000000e-05
  -1.0000000e-05
  -1.0000000e-05
  -1.0000000e-05
  -1.0000000e-05
  -1.0000000e-05
  -1.0000000e-05
  -1.0000000e-05
  -1.0000000e-05
  -1.0000000e-05
  -1.0000000e-05
  -1.0000000e-05
  -1.0000000e-05
  -1.0000000e-05
  -1.0000000e-05
  -1.0000000e-05
  -1.0000000e-05
  -1.0000000e-05
  -1.0000000e-05
  -1.0000000e-05
  -1.0000000e-05
  -1.0000000e-05
  -1.0000000e-05
  -1.0000000e-05
  -1.0000000e-05
  -1.0000000e-05
  -1.0000000e-05
  -1.0000000e-05
  -1.0000000e-05
  -1.0000000e-05
  -1.0000000e-05
  -1.0000000e-05
  -1.0000000e-05
  -1.0000000e-05
  -1.0000000e-05
  -1.0000000e-05
  -1.0000000e-05
  -1.0000000e-05
  -1.0000000e-05
  -1.0000000e-05
  -1.0000000e-05
  -1.0000000e-05
  -1.0000000e-05
  -1.0000000e-05
  -1.0000000e-05
  -1.0000000e-05
  -1.0000000e-05
  -1.0000000e-05
  -1.0000000e-05
  -1.0000000e-05
  -1.0000000e-05
  -1.0000000e-05
  -1.0000000e-05
  -1.0000000e-05
  -1.0000000e-05
  -1.0000000e-05
  -1.0000000e-05
  -1.0000000e-05
  -1.0000000e-05
  -1.0000000e-05
  -1.0000000e-05
  -1.0000000e-05
  -1.0000000e-05
  -1.0000000e-05
  -1.0000000e-05
  -1.0000000e-05
  -1.0000000e-05
  -1.0000000e-05
  -1.0000000e-05
  -1.0000000e-05
  -1.0000000e-05
  -1.0000000e-05
  -1.0000000e-05
  -1.0000000e-05
  -1.0000000e-05
  -1.0000000e-05
  -1.0000000e-05
  -1.0000000e-05
  -1.0000000e-05
  -1.0000000e-05
  -1.0000000e-05
  -1.0000000e-05
  -1.0000000e-05
  -1.0000000e-05
  -1.0000000e-05
  -1.0000000e-05
  -1.0000000e-05
  -1.0000000e-05
  -1.0000000e-05
  -1.0000000e-05
  -1.0000000e-05
  -1.0000000e-05
  -1.0000000e-05
  -1.0000000e-05
  -1.0000000e-05
  -1.0000000e-05
  -1.0000000e-05
  -1.0000000e-05
  -1.0000000e-05
  -1.0000000e-05
  -1.0000000e-05
  -1.0000000e-05
  -1.0000000e-05
  -1.0000000e-05
  -1.0000000e-05
  -1.0000000e-05
  -1.0000000e-05
  -1.0000000e-05
  -1.0000000e-05
  -1.0000000e-05
  -1.0000000e-05
  -1.0000000e-05
  -1.0000000e-05
  -1.0000000e-05
  -1.0000000e-05
  -1.0000000e-05
  -1.0000000e-05
  -1.0000000e-05
  -1.0000000e-05
  -1.0000000e-05
  -1.0000000e-05
  -1.0000000e-05
  -1.0000000e-05
  -1.0000000e-05
  -1.0000000e-05
  -1.0000000e-05
  -1.0000000e-05
  -1.0000000e-05
  -1.0000000e-05
  -1.0000000e-05
  -1.0000000e-05
  -1.0000000e-05
  -1.0000000e-05
  -1.0000000e-05
  -1.0000000e-05
  -1.0000000e-05
  -1.0000000e-05
  -1.0000000e-05
  -1.0000000e-05
  -1.0000000e-05
  -1.0000000e-05
  -1.0000000e-05
  -1.0000000e-05
  -1.0000000e-05
  -1.0000000e-05
  -1.0000000e-05
  -1.0000000e-05
  -1.0000000e-05
  -1.0000000e-05
  -1.0000000e-05
  -1.0000000e-05
  -1.0000000e-05
  -1.0000000e-05
  -1.0000000e-05
  -1.0000000e-05
  -1.0000000e-05
  -1.0000000e-05
  -1.0000000e-05
  -1.0000000e-05
  -1.0000000e-05
  -1.0000000e-05
  -1.0000000e-05
  -1.0000000e-05
  -1.0000000e-05
  -1.0000000e-05
  -1.0000000e-05
  -1.0000000e-05
  -1.0000000e-05
  -1.0000000e-05
  -1.0000000e-05
  -1.0000000e-05
  -1.0000000e-05
  -1.0000000e-05
  -1.0000000e-05
  -1.0000000e-05
  -1.0000000e-05
  -1.0000000e-05
  -1.0000000e-05
  -1.0000000e-05
  -1.0000000e-05
  -1.0000000e-05
  -1.0000000e-05
  -1.0000000e-05
  -1.0000000e-05
  -1.0000000e-05
  -1.0000000e-05
  -1.0000000e-05
  -1.0000000e-05
  -1.0000000e-05
  -1.0000000e-05
  -1.0000000e-05
  -1.0000000e-05
  -1.0000000e-05
  -1.0000000e-05
  -1.0000000e-05
  -1.0000000e-05
  -1.0000000e-05
  -1.0000000e-05
  -1.0000000e-05
  -1.0000000e-05
  -1.0000000e-05
  -1.0000000e-05
  -1.0000000e-05
  -1.0000000e-05
  -1.0000000e-05
  -1.0000000e-05
  -1.0000000e-05
  -1.0000000e-05
  -1.0000000e-05
  -1.0000000e-05
  -1.0000000e-05
  -1.0000000e-05
  -1.0000000e-05
  -1.0000000e-05
  -1.0000000e-05
  -1.0000000e-05
  -1.0000000e-05
  -1.0000000e-05
  -1.0000000e-05
  -1.0000000e-05
  -1.0000000e-05
  -1.0000000e-05
  -1.0000000e-05
  -1.0000000e-05
  -1.0000000e-05
  -1.0000000e-05
  -1.0000000e-05
  -1.0000000e-05
  -1.0000000e-05
  -1.0000000e-05
  -1.0000000e-05
  -1.0000000e-05
  -1.0000000e-05
  -1.0000000e-05
  -1.0000000e-05
  -1.0000000e-05
  -1.0000000e-05
  -1.0000000e-05
  -1.0000000e-05
  -1.0000000e-05
  -1.0000000e-05
  -1.0000000e-05
  -1.0000000e-05
  -1.0000000e-05
  -1.0000000e-05
  -1.0000000e-05
  -1.0000000e-05
  -1.0000000e-05
  -1.0000000e-05
  -1.0000000e-05
  -1.0000000e-05
  -1.0000000e-05
  -1.0000000e-05
  -1.0000000e-05
  -1.0000000e-05
  -1.0000000e-05
  -1.0000000e-05
  -1.0000000e-05
  -1.0000000e-05
  -1.0000000e-05
  -1.0000000e-05
  -1.0000000e-05
  -1.0000000e-05
  -1.0000000e-05
  -1.0000000e-05
  -1.0000000e-05
  -1.0000000e-05
  -1.0000000e-05
  -1.0000000e-05
  -1.0000000e-05
  -1.0000000e-05
  -1.0000000e-05
  -1.0000000e-05
  -1.0000000e-05
  -1.0000000e-05
  -1.0000000e-05
  -1.0000000e-05
  -1.0000000e-05
  -1.0000000e-05
  -1.0000000e-05
  -1.0000000e-05
  -1.0000000e-05
  -1.0000000e-05
  -1.0000000e-05
  -1.0000000e-05
  -1.0000000e-05
  -1.0000000e-05
  -1.0000000e-05
  -1.0000000e-05
  -1.0000000e-05
  -1.0000000e-05
  -1.0000000e-05
  -1.0000000e-05
  -1.0000000e-05
  -1.0000000e-05
  -1.0000000e-05
  -1.0000000e-05
  -1.0000000e-05
  -1.0000000e-05
  -1.0000000e-05
  -1.0000000e-05
  -1.0000000e-05
  -1.0000000e-05
  -1.0000000e-05
  -1.0000000e-05
  -1.0000000e-05
  -1.0000000e-05
  -1.0000000e-05
  -1.0000000e-05
  -1.0000000e-05
  -1.0000000e-05
  -1.0000000e-05
  -1.0000000e-05
  -1.0000000e-05
  -1.0000000e-05
  -1.0000000e-05
  -1.0000000e-05
  -1.0000000e-05
  -1.0000000e-05
  -1.0000000e-05
  -1.0000000e-05
  -1.0000000e-05
  -1.0000000e-05
  -1.0000000e-05
  -1.0000000e-05
  -1.0000000e-05
  -1.0000000e-05
  -1.0000000e-05
  -1.0000000e-05
  -1.0000000e-05
  -1.0000000e-05
  -1.0000000e-05
  -1.0000000e-05
  -1.0000000e-05
  -1.0000000e-05
  -1.0000000e-05
  -1.0000000e-05
  -1.0000000e-05
  -1.0000000e-05
  -1.0000000e-05
  -1.0000000e-05
  -1.0000000e-05
  -1.0000000e-05
  -1.0000000e-05
  -1.0000000e-05
  -1.0000000e-05
  -1.0000000e-05
  -1.0000000e-05
  -1.0000000e-05
  -1.0000000e-05
  -1.0000000e-05
  -1.0000000e-05
  -1.0000000e-05
  -1.0000000e-05
  -1.0000000e-05
  -1.0000000e-05
  -1.0000000e-05
  -1.0000000e-05
  -1.0000000e-05
  -1.0000000e-05
  -1.0000000e-05
  -1.0000000e-05
  -1.0000000e-05
  -1.0000000e-05
  -1.0000000e-05
  -1.0000000e-05
  -1.0000000e-05
  -1.0000000e-05
  -1.0000000e-05
  -1.0000000e-05
  -1.0000000e-05
  -1.0000000e-05
  -1.0000000e-05
  -1.0000000e-05
  -1.0000000e-05
  -1.0000000e-05
  -1.0000000e-05
  -1.0000000e-05
  -1.0000000e-05
  -1.0000000e-05
  -1.0000000e-05
  -1.0000000e-05
  -1.0000000e-05
  -1.0000000e-05
  -1.0000000e-05
  -1.0000000e-05
  -1.0000000e-05
  -1.0000000e-05
  -1.0000000e-05
  -1.0000000e-05
  -1.0000000e-05
  -1.0000000e-05
  -1.0000000e-05
  -1.0000000e-05
  -1.0000000e-05
  -1.0000000e-05
  -1.0000000e-05
  -1.0000000e-05
  -1.0000000e-05
  -1.0000000e-05
  -1.0000000e-05
  -1.0000000e-05
  -1.0000000e-05
  -1.0000000e-05
  -1.0000000e-05
  -1.0000000e-05
  -1.0000000e-05
  -1.0000000e-05
  -1.0000000e-05
  -1.0000000e-05
  -1.0000000e-05
  -1.0000000e-05
  -1.0000000e-05
  -1.0000000e-05
  -1.0000000e-05
  -1.0000000e-05
  -1.0000000e-05
  -1.0000000e-05
  -1.0000000e-05
  -1.0000000e-05
  -1.0000000e-05
  -1.0000000e-05
  -1.0000000e-05
  -1.0000000e-05
  -1.0000000e-05
  -1.0000000e-05
  -1.0000000e-05
  -1.0000000e-05
  -1.0000000e-05
  -1.0000000e-05
  -1.0000000e-05
  -1.0000000e-05
  -1.0000000e-05
  -1.0000000e-05
  -1.0000000e-05
  -1.0000000e-05
  -1.0000000e-05
  -1.0000000e-05
  -1.0000000e-05
  -1.0000000e-05
  -1.0000000e-05
  -1.0000000e-05
  -1.0000000e-05
  -1.0000000e-05
  -1.0000000e-05
  -1.0000000e-05
  -1.0000000e-05
  -1.0000000e-05
  -1.0000000e-05
  -1.0000000e-05
  -1.0000000e-05
  -1.0000000e-05
  -1.0000000e-05
  -1.0000000e-05
  -1.0000000e-05
  -1.0000000e-05
  -1.0000000e-05
  -1.0000000e-05
  -1.0000000e-05
  -1.0000000e-05
  -1.0000000e-05
  -1.0000000e-05
  -1.0000000e-05
  -1.0000000e-05
  -1.0000000e-05
  -1.0000000e-05
  -1.0000000e-05
  -1.0000000e-05
  -1.0000000e-05
  -1.0000000e-05
  -1.0000000e-05
  -1.0000000e-05
  -1.0000000e-05
  -1.0000000e-05
  -1.0000000e-05
  -1.0000000e-05
  -1.0000000e-05
  -1.0000000e-05
  -1.0000000e-05
  -1.0000000e-05
  -1.0000000e-05
  -1.0000000e-05
  -1.0000000e-05
  -1.0000000e-05
  -1.0000000e-05
  -1.0000000e-05
  -1.0000000e-05
  -1.0000000e-05
  -1.0000000e-05
  -1.0000000e-05
  -1.0000000e-05
  -1.0000000e-05
  -1.0000000e-05
  -1.0000000e-05
  -1.0000000e-05
  -1.0000000e-05
  -1.0000000e-05
  -1.0000000e-05
  -1.0000000e-05
  -1.0000000e-05
  -1.0000000e-05
  -1.0000000e-05
  -1.0000000e-05
  -1.0000000e-05
  -1.0000000e-05
  -1.0000000e-05
  -1.0000000e-05
  -1.0000000e-05
  -1.0000000e-05
  -1.0000000e-05
  -1.0000000e-05
  -1.0000000e-05
  -1.0000000e-05
  -1.0000000e-05
  -1.0000000e-05
  -1.0000000e-05
  -1.0000000e-05
  -1.0000000e-05
  -1.0000000e-05
  -1.0000000e-05
  -1.0000000e-05
  -1.0000000e-05
  -1.0000000e-05
  -1.0000000e-05
  -1.0000000e-05
  -1.0000000e-05
  -1.0000000e-05
  -1.0000000e-05
  -1.0000000e-05
  -1.0000000e-05
  -1.0000000e-05
  -1.0000000e-05
  -1.0000000e-05
  -1.0000000e-05
  -1.0000000e-05
  -1.0000000e-05
  -1.0000000e-05
  -1.0000000e-05
  -1.0000000e-05
  -1.0000000e-05
  -1.0000000e-05
  -1.0000000e-05
  -1.0000000e-05
  -1.0000000e-05
  -1.0000000e-05
  -1.0000000e-05
  -1.0000000e-05
  -1.0000000e-05
  -1.0000000e-05
  -1.0000000e-05
  -1.0000000e-05
  -1.0000000e-05
  -1.0000000e-05
  -1.0000000e-05
  -1.0000000e-05
  -1.0000000e-05
  -1.0000000e-05
  -1.0000000e-05
  -1.0000000e-05
  -1.0000000e-05
  -1.0000000e-05
  -1.0000000e-05
  -1.0000000e-05
  -1.0000000e-05
  -1.0000000e-05
  -1.0000000e-05
  -1.0000000e-05
  -1.0000000e-05
  -1.0000000e-05
  -1.0000000e-05
  -1.0000000e-05
  -1.0000000e-05
  -1.0000000e-05
  -1.0000000e-05
  -1.0000000e-05
  -1.0000000e-05
  -1.0000000e-05
  -1.0000000e-05
  -1.0000000e-05
  -1.0000000e-05
  -1.0000000e-05
  -1.0000000e-05
  -1.0000000e-05
  -1.0000000e-05
  -1.0000000e-05
  -1.0000000e-05
  -1.0000000e-05
  -1.0000000e-05
  -1.0000000e-05
  -1.0000000e-05
  -1.0000000e-05
  -1.0000000e-05
  -1.0000000e-05
  -1.0000000e-05
  -1.0000000e-05
  -1.0000000e-05
  -1.0000000e-05
  -1.0000000e-05
  -1.0000000e-05
  -1.0000000e-05
  -1.0000000e-05
  -1.0000000e-05
  -1.0000000e-05
  -1.0000000e-05
  -1.0000000e-05
  -1.0000000e-05
  -1.0000000e-05
  -1.0000000e-05
  -1.0000000e-05
  -1.0000000e-05
  -1.0000000e-05
  -1.0000000e-05
  -1.0000000e-05
  -1.0000000e-05
  -1.0000000e-05
  -1.0000000e-05
  -1.0000000e-05
  -1.0000000e-05
  -1.0000000e-05
  -1.0000000e-05
  -1.0000000e-05
  -1.0000000e-05
  -1.0000000e-05
  -1.0000000e-05
  -1.0000000e-05
  -1.0000000e-05
  -1.0000000e-05
  -1.0000000e-05
  -1.0000000e-05
  -1.0000000e-05
  -1.0000000e-05
  -1.0000000e-05
  -1.0000000e-05
  -1.0000000e-05
  -1.0000000e-05
  -1.0000000e-05
  -1.0000000e-05
  -1.0000000e-05
  -1.0000000e-05
  -1.0000000e-05
  -1.0000000e-05
  -1.0000000e-05
  -1.0000000e-05
  -1.0000000e-05
  -1.0000000e-05
  -1.0000000e-05
  -1.0000000e-05
  -1.0000000e-05
  -1.0000000e-05
  -1.0000000e-05
  -1.0000000e-05
  -1.0000000e-05
  -1.0000000e-05
  -1.0000000e-05
  -1.0000000e-05
  -1.0000000e-05
  -1.0000000e-05
  -1.0000000e-05
  -1.0000000e-05
  -1.0000000e-05
  -1.0000000e-05
  -1.0000000e-05
  -1.0000000e-05
  -1.0000000e-05
  -1.0000000e-05
  -1.0000000e-05
  -1.0000000e-05
  -1.0000000e-05
  -1.0000000e-05
  -1.0000000e-05
  -1.0000000e-05
  -1.0000000e-05
  -1.0000000e-05
  -1.0000000e-05
  -1.0000000e-05
  -1.0000000e-05
  -1.0000000e-05
  -1.0000000e-05
  -1.0000000e-05
  -1.0000000e-05
  -1.0000000e-05
  -1.0000000e-05
  -1.0000000e-05
  -1.0000000e-05
  -1.0000000e-05
  -1.0000000e-05
  -1.0000000e-05
  -1.0000000e-05
  -1.0000000e-05
  -1.0000000e-05
  -1.0000000e-05
  -1.0000000e-05
  -1.0000000e-05
  -1.0000000e-05
  -1.0000000e-05
  -1.0000000e-05
  -1.0000000e-05
  -1.0000000e-05
  -1.0000000e-05
  -1.0000000e-05
  -1.0000000e-05
  -1.0000000e-05
  -1.0000000e-05
  -1.0000000e-05
  -1.0000000e-05
  -1.0000000e-05
  -1.0000000e-05
  -1.0000000e-05
  -1.0000000e-05
  -1.0000000e-05
  -1.0000000e-05
  -1.0000000e-05
  -1.0000000e-05
  -1.0000000e-05
  -1.0000000e-05
  -1.0000000e-05
  -1.0000000e-05
  -1.0000000e-05
  -1.0000000e-05
  -1.0000000e-05
  -1.0000000e-05
  -1.0000000e-05
  -1.0000000e-05
  -1.0000000e-05
  -1.0000000e-05
  -1.0000000e-05
  -1.0000000e-05
  -1.0000000e-05
  -1.0000000e-05
  -1.0000000e-05
  -1.0000000e-05
  -1.0000000e-05
  -1.0000000e-05
  -1.0000000e-05
  -1.0000000e-05
  -1.0000000e-05
  -1.0000000e-05
  -1.0000000e-05
  -1.0000000e-05
  -1.0000000e-05
  -1.0000000e-05
  -1.0000000e-05
  -1.0000000e-05
  -1.0000000e-05
  -1.0000000e-05
  -1.0000000e-05
  -1.0000000e-05
  -1.0000000e-05
  -1.0000000e-05
  -1.0000000e-05
  -1.0000000e-05
  -1.0000000e-05
  -1.0000000e-05
  -1.0000000e-05
  -1.0000000e-05
  -1.0000000e-05
  -1.0000000e-05
  -1.0000000e-05
  -1.0000000e-05
  -1.0000000e-05
  -1.0000000e-05
  -1.0000000e-05
  -1.0000000e-05
  -1.0000000e-05
  -1.0000000e-05
  -1.0000000e-05
  -1.0000000e-05
  -1.0000000e-05
  -1.0000000e-05
  -1.0000000e-05
  -1.0000000e-05
  -1.0000000e-05
  -1.0000000e-05
  -1.0000000e-05
  -1.0000000e-05
  -1.0000000e-05
  -1.0000000e-05
  -1.0000000e-05
  -1.0000000e-05
  -1.0000000e-05
  -1.0000000e-05
  -1.0000000e-05
  -1.0000000e-05
  -1.0000000e-05
  -1.0000000e-05
  -1.0000000e-05
  -1.0000000e-05
  -1.0000000e-05
  -1.0000000e-05
  -1.0000000e-05
  -1.0000000e-05
  -1.0000000e-05
  -1.0000000e-05
  -1.0000000e-05
  -1.0000000e-05
  -1.0000000e-05
  -1.0000000e-05
  -1.0000000e-05
  -1.0000000e-05
  -1.0000000e-05
  -1.0000000e-05
  -1.0000000e-05
  -1.0000000e-05
  -1.0000000e-05
  -1.0000000e-05
  -1.0000000e-05
  -1.0000000e-05
  -1.0000000e-05
  -1.0000000e-05
  -1.0000000e-05
  -1.0000000e-05
  -1.0000000e-05
  -1.0000000e-05
  -1.0000000e-05
  -1.0000000e-05
  -1.0000000e-05
  -1.0000000e-05
  -1.0000000e-05
  -1.0000000e-05
  -1.0000000e-05
  -1.0000000e-05
  -1.0000000e-05
  -1.0000000e-05
  -1.0000000e-05
  -1.0000000e-05
  -1.0000000e-05
  -1.0000000e-05
  -1.0000000e-05
  -1.0000000e-05
  -1.0000000e-05
  -1.0000000e-05
  -1.0000000e-05
  -1.0000000e-05
  -1.0000000e-05
  -1.0000000e-05
  -1.0000000e-05
  -1.0000000e-05
  -1.0000000e-05
  -1.0000000e-05
  -1.0000000e-05
  -1.0000000e-05
  -1.0000000e-05
  -1.0000000e-05
  -1.0000000e-05
  -1.0000000e-05
  -1.0000000e-05
  -1.0000000e-05
  -1.0000000e-05
  -1.0000000e-05
  -1.0000000e-05
  -1.0000000e-05
  -1.0000000e-05
  -1.0000000e-05
  -1.0000000e-05
  -1.0000000e-05
  -1.0000000e-05
  -1.0000000e-05
  -1.0000000e-05
  -1.0000000e-05
  -1.0000000e-05
  -1.0000000e-05
  -1.0000000e-05
  -1.0000000e-05
  -1.0000000e-05
  -1.0000000e-05
  -1.0000000e-05
  -1.0000000e-05
  -1.0000000e-05
  -1.0000000e-05
  -1.0000000e-05
  -1.0000000e-05
  -1.0000000e-05
  -1.0000000e-05
  -1.0000000e-05
  -1.0000000e-05
  -1.0000000e-05
  -1.0000000e-05
  -1.0000000e-05
  -1.0000000e-05
  -1.0000000e-05
  -1.0000000e-05
  -1.0000000e-05
  -1.0000000e-05
  -1.0000000e-05
  -1.0000000e-05
  -1.0000000e-05
  -1.0000000e-05
  -1.0000000e-05
  -1.0000000e-05
  -1.0000000e-05
  -1.0000000e-05
  -1.0000000e-05
  -1.0000000e-05
  -1.0000000e-05
  -1.0000000e-05
  -1.0000000e-05
  -1.0000000e-05
  -1.0000000e-05
  -1.0000000e-05
  -1.0000000e-05
  -1.0000000e-05
  -1.0000000e-05
  -1.0000000e-05
  -1.0000000e-05
  -1.0000000e-05
  -1.0000000e-05
  -1.0000000e-05
  -1.0000000e-05
  -1.0000000e-05
  -1.0000000e-05
  -1.0000000e-05
  -1.0000000e-05
  -1.0000000e-05
  -1.0000000e-05
  -1.0000000e-05
  -1.0000000e-05
  -1.0000000e-05
  -1.0000000e-05
  -1.0000000e-05
  -1.0000000e-05
  -1.0000000e-05
  -1.0000000e-05
  -1.0000000e-05
  -1.0000000e-05
  -1.0000000e-05
  -1.0000000e-05
  -1.0000000e-05
  -1.0000000e-05
  -1.0000000e-05
  -1.0000000e-05
  -1.0000000e-05
  -1.0000000e-05
  -1.0000000e-05
  -1.0000000e-05
  -1.0000000e-05
  -1.0000000e-05
  -1.0000000e-05
  -1.0000000e-05
  -1.0000000e-05
  -1.0000000e-05
  -1.0000000e-05
  -1.0000000e-05
  -1.0000000e-05
  -1.0000000e-05
  -1.0000000e-05
  -1.0000000e-05
  -1.0000000e-05
  -1.0000000e-05
  -1.0000000e-05
  -1.0000000e-05
  -1.0000000e-05
  -1.0000000e-05
  -1.0000000e-05
  -1.0000000e-05
  -1.0000000e-05
  -1.0000000e-05
  -1.0000000e-05
  -1.0000000e-05
  -1.0000000e-05
  -1.0000000e-05
  -1.0000000e-05
  -1.0000000e-05
  -1.0000000e-05
  -1.0000000e-05
  -1.0000000e-05
  -1.0000000e-05
  -1.0000000e-05
  -1.0000000e-05
  -1.0000000e-05
  -1.0000000e-05
  -1.0000000e-05
  -1.0000000e-05
  -1.0000000e-05
  -1.0000000e-05
  -1.0000000e-05
  -1.0000000e-05
  -1.0000000e-05
  -1.0000000e-05
  -1.0000000e-05
  -1.0000000e-05
  -1.0000000e-05
  -1.0000000e-05
  -1.0000000e-05
  -1.0000000e-05
  -1.0000000e-05
  -1.0000000e-05
  -1.0000000e-05
  -1.0000000e-05
  -1.0000000e-05
  -1.0000000e-05
  -1.0000000e-05
  -1.0000000e-05
  -1.0000000e-05
  -1.0000000e-05
  -1.0000000e-05
  -1.0000000e-05
  -1.0000000e-05
  -1.0000000e-05
  -1.0000000e-05
  -1.0000000e-05
  -1.0000000e-05
  -1.0000000e-05
  -1.0000000e-05
  -1.0000000e-05
  -1.0000000e-05
  -1.0000000e-05
  -1.0000000e-05
  -1.0000000e-05
  -1.0000000e-05
  -1.0000000e-05
  -1.0000000e-05
  -1.0000000e-05
  -1.0000000e-05
  -1.0000000e-05
  -1.0000000e-05
  -1.0000000e-05
  -1.0000000e-05
  -1.0000000e-05
  -1.0000000e-05
  -1.0000000e-05
  -1.0000000e-05
  -1.0000000e-05
  -1.0000000e-05
  -1.0000000e-05
  -1.0000000e-05
  -1.0000000e-05
  -1.0000000e-05
  -1.0000000e-05
  -1.0000000e-05
  -1.0000000e-05
  -1.0000000e-05
  -1.0000000e-05
  -1.0000000e-05
  -1.0000000e-05
  -1.0000000e-05
  -1.0000000e-05
  -1.0000000e-05
  -1.0000000e-05
  -1.0000000e-05
  -1.0000000e-05
  -1.0000000e-05
  -1.0000000e-05
  -1.0000000e-05
  -1.0000000e-05
  -1.0000000e-05
  -1.0000000e-05
  -1.0000000e-05
  -1.0000000e-05
  -1.0000000e-05
  -1.0000000e-05
  -1.0000000e-05
  -1.0000000e-05
  -1.0000000e-05
  -1.0000000e-05
  -1.0000000e-05
  -1.0000000e-05
  -1.0000000e-05
  -1.0000000e-05
  -1.0000000e-05
  -1.0000000e-05
  -1.0000000e-05
  -1.0000000e-05
  -1.0000000e-05
  -1.0000000e-05
  -1.0000000e-05
  -1.0000000e-05
  -1.0000000e-05
  -1.0000000e-05
  -1.0000000e-05
  -1.0000000e-05
  -1.0000000e-05
  -1.0000000e-05
  -1.0000000e-05
  -1.0000000e-05
  -1.0000000e-05
  -1.0000000e-05
  -1.0000000e-05
  -1.0000000e-05
  -1.0000000e-05
  -1.0000000e-05
  -1.0000000e-05
  -1.0000000e-05
  -1.0000000e-05
  -1.0000000e-05
  -1.0000000e-05
  -1.0000000e-05
  -1.0000000e-05
  -1.0000000e-05
  -1.0000000e-05
  -1.0000000e-05
  -1.0000000e-05
  -1.0000000e-05
  -1.0000000e-05
  -1.0000000e-05
  -1.0000000e-05
  -1.0000000e-05
  -1.0000000e-05
  -1.0000000e-05
  -1.0000000e-05
  -1.0000000e-05
  -1.0000000e-05
  -1.0000000e-05
  -1.0000000e-05
  -1.0000000e-05
  -1.0000000e-05
  -1.0000000e-05
  -1.0000000e-05
  -1.0000000e-05
  -1.0000000e-05
  -1.0000000e-05
  -1.0000000e-05
  -1.0000000e-05
  -1.0000000e-05
  -1.0000000e-05
  -1.0000000e-05
  -1.0000000e-05
  -1.0000000e-05
  -1.0000000e-05
  -1.0000000e-05
  -1.0000000e-05
  -1.0000000e-05
  -1.0000000e-05
  -1.0000000e-05
  -1.0000000e-05
  -1.0000000e-05
  -1.0000000e-05
  -1.0000000e-05
  -1.0000000e-05
  -1.0000000e-05
  -1.0000000e-05
  -1.0000000e-05
  -1.0000000e-05
  -1.0000000e-05
  -1.0000000e-05
  -1.0000000e-05
  -1.0000000e-05
  -1.0000000e-05
  -1.0000000e-05
  -1.0000000e-05
  -1.0000000e-05
  -1.0000000e-05
  -1.0000000e-05
  -1.0000000e-05
  -1.0000000e-05
  -1.0000000e-05
  -1.0000000e-05
  -1.0000000e-05
  -1.0000000e-05
  -1.0000000e-05
  -1.0000000e-05
  -1.0000000e-05
  -1.0000000e-05
  -1.0000000e-05
  -1.0000000e-05
  -1.0000000e-05
  -1.0000000e-05
  -1.0000000e-05
  -1.0000000e-05
  -1.0000000e-05
  -1.0000000e-05
  -1.0000000e-05
  -1.0000000e-05
  -1.0000000e-05
  -1.0000000e-05
  -1.0000000e-05
  -1.0000000e-05
  -1.0000000e-05
  -1.0000000e-05
  -1.0000000e-05
  -1.0000000e-05
  -1.0000000e-05
  -1.0000000e-05
  -1.0000000e-05
  -1.0000000e-05
  -1.0000000e-05
  -1.0000000e-05
  -1.0000000e-05
  -1.0000000e-05
  -1.0000000e-05
  -1.0000000e-05
  -1.0000000e-05
  -1.0000000e-05
  -1.0000000e-05
  -1.0000000e-05
  -1.0000000e-05
  -1.0000000e-05
  -1.0000000e-05
  -1.0000000e-05
  -1.0000000e-05
  -1.0000000e-05
  -1.0000000e-05
  -1.0000000e-05
  -1.0000000e-05
  -1.0000000e-05
  -1.0000000e-05
  -1.0000000e-05
  -1.0000000e-05
  -1.0000000e-05
  -1.0000000e-05
  -1.0000000e-05
  -1.0000000e-05
  -1.0000000e-05
  -1.0000000e-05
  -1.0000000e-05
  -1.0000000e-05
  -1.0000000e-05
  -1.0000000e-05
  -1.0000000e-05
  -1.0000000e-05
  -1.0000000e-05
  -1.0000000e-05
  -1.0000000e-05
  -1.0000000e-05
  -1.0000000e-05
  -1.0000000e-05
  -1.0000000e-05
  -1.0000000e-05
  -1.0000000e-05
  -1.0000000e-05
  -1.0000000e-05
  -1.0000000e-05
  -1.0000000e-05
  -1.0000000e-05
  -1.0000000e-05
  -1.0000000e-05
  -1.0000000e-05
  -1.0000000e-05
  -1.0000000e-05
  -1.0000000e-05
  -1.0000000e-05
  -1.0000000e-05
  -1.0000000e-05
  -1.0000000e-05
  -1.0000000e-05
  -1.0000000e-05
  -1.0000000e-05
  -1.0000000e-05
  -1.0000000e-05
  -1.0000000e-05
  -1.0000000e-05
  -1.0000000e-05
  -1.0000000e-05
  -1.0000000e-05
  -1.0000000e-05
  -1.0000000e-05
  -1.0000000e-05
  -1.0000000e-05
  -1.0000000e-05
  -1.0000000e-05
  -1.0000000e-05
  -1.0000000e-05
  -1.0000000e-05
  -1.0000000e-05
  -1.0000000e-05
  -1.0000000e-05
  -1.0000000e-05
  -1.0000000e-05
  -1.0000000e-05
  -1.0000000e-05
  -1.0000000e-05
  -1.0000000e-05
  -1.0000000e-05
  -1.0000000e-05
  -1.0000000e-05
  -1.0000000e-05
  -1.0000000e-05
  -1.0000000e-05
  -1.0000000e-05
  -1.0000000e-05
  -1.0000000e-05
  -1.0000000e-05
  -1.0000000e-05
  -1.0000000e-05
  -1.0000000e-05
  -1.0000000e-05
  -1.0000000e-05
  -1.0000000e-05
  -1.0000000e-05
  -1.0000000e-05
  -1.0000000e-05
  -1.0000000e-05
  -1.0000000e-05
  -1.0000000e-05
  -1.0000000e-05
  -1.0000000e-05
  -1.0000000e-05
  -1.0000000e-05
  -1.0000000e-05
  -1.0000000e-05
  -1.0000000e-05
  -1.0000000e-05
  -1.0000000e-05
  -1.0000000e-05
  -1.0000000e-05
  -1.0000000e-05
  -1.0000000e-05
  -1.0000000e-05
  -1.0000000e-05
  -1.0000000e-05
  -1.0000000e-05
  -1.0000000e-05
  -1.0000000e-05
  -1.0000000e-05
  -1.0000000e-05
  -1.0000000e-05
  -1.0000000e-05
  -1.0000000e-05
  -1.0000000e-05
  -1.0000000e-05
  -1.0000000e-05
  -1.0000000e-05
  -1.0000000e-05
  -1.0000000e-05
  -1.0000000e-05
  -1.0000000e-05
  -1.0000000e-05
  -1.0000000e-05
  -1.0000000e-05
  -1.0000000e-05
  -1.0000000e-05
  -1.0000000e-05
  -1.0000000e-05
  -1.0000000e-05
  -1.0000000e-05
  -1.0000000e-05
  -1.0000000e-05
  -1.0000000e-05
  -1.0000000e-05
  -1.0000000e-05
  -1.0000000e-05
  -1.0000000e-05
  -1.0000000e-05
  -1.0000000e-05
  -1.0000000e-05
  -1.0000000e-05
  -1.0000000e-05
  -1.0000000e-05
  -1.0000000e-05
  -1.0000000e-05
  -1.0000000e-05
  -1.0000000e-05
  -1.0000000e-05
  -1.0000000e-05
  -1.0000000e-05
  -1.0000000e-05
  -1.0000000e-05
  -1.0000000e-05
  -1.0000000e-05
  -1.0000000e-05
  -1.0000000e-05
  -1.0000000e-05
  -1.0000000e-05
  -1.0000000e-05
  -1.0000000e-05
  -1.0000000e-05
  -1.0000000e-05
  -1.0000000e-05
  -1.0000000e-05
  -1.0000000e-05
  -1.0000000e-05
  -1.0000000e-05
  -1.0000000e-05
  -1.0000000e-05
  -1.0000000e-05
  -1.0000000e-05
  -1.0000000e-05
  -1.0000000e-05
  -1.0000000e-05
  -1.0000000e-05
  -1.0000000e-05
  -1.0000000e-05
  -1.0000000e-05
  -1.0000000e-05
  -1.0000000e-05
  -1.0000000e-05
  -1.0000000e-05
  -1.0000000e-05
  -1.0000000e-05
  -1.0000000e-05
  -1.0000000e-05
  -1.0000000e-05
  -1.0000000e-05
  -1.0000000e-05
  -1.0000000e-05
  -1.0000000e-05
  -1.0000000e-05
  -1.0000000e-05
  -1.0000000e-05
  -1.0000000e-05
  -1.0000000e-05
  -1.0000000e-05
  -1.0000000e-05
  -1.0000000e-05
  -1.0000000e-05
  -1.0000000e-05
  -1.0000000e-05
  -1.0000000e-05
  -1.0000000e-05
  -1.0000000e-05
  -1.0000000e-05
  -1.0000000e-05
  -1.0000000e-05
  -1.0000000e-05
  -1.0000000e-05
  -1.0000000e-05
  -1.0000000e-05
  -1.0000000e-05
  -1.0000000e-05
  -1.0000000e-05
  -1.0000000e-05
  -1.0000000e-05
  -1.0000000e-05
  -1.0000000e-05
  -1.0000000e-05
  -1.0000000e-05
  -1.0000000e-05
  -1.0000000e-05
  -1.0000000e-05
  -1.0000000e-05
  -1.0000000e-05
  -1.0000000e-05
  -1.0000000e-05
  -1.0000000e-05
  -1.0000000e-05
  -1.0000000e-05
  -1.0000000e-05
  -1.0000000e-05
  -1.0000000e-05
  -1.0000000e-05
  -1.0000000e-05
  -1.0000000e-05
  -1.0000000e-05
  -1.0000000e-05
  -1.0000000e-05
  -1.0000000e-05
  -1.0000000e-05
  -1.0000000e-05
  -1.0000000e-05
  -1.0000000e-05
  -1.0000000e-05
  -1.0000000e-05
  -1.0000000e-05
  -1.0000000e-05
  -1.0000000e-05
  -1.0000000e-05
  -1.0000000e-05
  -1.0000000e-05
  -1.0000000e-05
  -1.0000000e-05
  -1.0000000e-05
  -1.0000000e-05
  -1.0000000e-05
  -1.0000000e-05
  -1.0000000e-05
  -1.0000000e-05
  -1.0000000e-05
  -1.0000000e-05
  -1.0000000e-05
  -1.0000000e-05
  -1.0000000e-05
  -1.0000000e-05
  -1.0000000e-05
  -1.0000000e-05
  -1.0000000e-05
  -1.0000000e-05
  -1.0000000e-05
  -1.0000000e-05
  -1.0000000e-05
  -1.0000000e-05
  -1.0000000e-05
  -1.0000000e-05
  -1.0000000e-05
  -1.0000000e-05
  -1.0000000e-05
  -1.0000000e-05
  -1.0000000e-05
  -1.0000000e-05
  -1.0000000e-05
  -1.0000000e-05
  -1.0000000e-05
  -1.0000000e-05
  -1.0000000e-05
  -1.0000000e-05
  -1.0000000e-05
  -1.0000000e-05
  -1.0000000e-05
  -1.0000000e-05
  -1.0000000e-05
  -1.0000000e-05
  -1.0000000e-05
  -1.0000000e-05
  -1.0000000e-05
  -1.0000000e-05
  -1.0000000e-05
  -1.0000000e-05
  -1.0000000e-05
  -1.0000000e-05
  -1.0000000e-05
  -1.0000000e-05
  -1.0000000e-05
  -1.0000000e-05
  -1.0000000e-05
  -1.0000000e-05
  -1.0000000e-05
  -1.0000000e-05
  -1.0000000e-05
  -1.0000000e-05
  -1.0000000e-05
  -1.0000000e-05
  -1.0000000e-05
  -1.0000000e-05
  -1.0000000e-05
  -1.0000000e-05
  -1.0000000e-05
  -1.0000000e-05
  -1.0000000e-05
  -1.0000000e-05
  -1.0000000e-05
  -1.0000000e-05
  -1.0000000e-05
  -1.0000000e-05
  -1.0000000e-05
  -1.0000000e-05
  -1.0000000e-05
  -1.0000000e-05
  -1.0000000e-05
  -1.0000000e-05
  -1.0000000e-05
  -1.0000000e-05
  -1.0000000e-05
  -1.0000000e-05
  -1.0000000e-05
  -1.0000000e-05
  -1.0000000e-05
  -1.0000000e-05
  -1.0000000e-05
  -1.0000000e-05
  -1.0000000e-05
  -1.0000000e-05
  -1.0000000e-05
  -1.0000000e-05
  -1.0000000e-05
  -1.0000000e-05
  -1.0000000e-05
  -1.0000000e-05
  -1.0000000e-05
  -1.0000000e-05
  -1.0000000e-05
  -1.0000000e-05
  -1.0000000e-05
  -1.0000000e-05
  -1.0000000e-05
  -1.0000000e-05
  -1.0000000e-05
  -1.0000000e-05
  -1.0000000e-05
  -1.0000000e-05
  -1.0000000e-05
  -1.0000000e-05
  -1.0000000e-05
  -1.0000000e-05
  -1.0000000e-05
  -1.0000000e-05
  -1.0000000e-05
  -1.0000000e-05
  -1.0000000e-05
  -1.0000000e-05
  -1.0000000e-05
  -1.0000000e-05
  -1.0000000e-05
  -1.0000000e-05
  -1.0000000e-05
  -1.0000000e-05
  -1.0000000e-05
  -1.0000000e-05
  -1.0000000e-05
  -1.0000000e-05
  -1.0000000e-05
  -1.0000000e-05
  -1.0000000e-05
  -1.0000000e-05
  -1.0000000e-05
  -1.0000000e-05
  -1.0000000e-05
  -1.0000000e-05
  -1.0000000e-05
  -1.0000000e-05
  -1.0000000e-05
  -1.0000000e-05
  -1.0000000e-05
  -1.0000000e-05
  -1.0000000e-05
  -1.0000000e-05
  -1.0000000e-05
  -1.0000000e-05
  -1.0000000e-05
  -1.0000000e-05
  -1.0000000e-05
  -1.0000000e-05
  -1.0000000e-05
  -1.0000000e-05
  -1.0000000e-05
  -1.0000000e-05
  -1.0000000e-05
  -1.0000000e-05
  -1.0000000e-05
  -1.0000000e-05
  -1.0000000e-05
  -1.0000000e-05
  -1.0000000e-05
  -1.0000000e-05
  -1.0000000e-05
  -1.0000000e-05
  -1.0000000e-05
  -1.0000000e-05
  -1.0000000e-05
  -1.0000000e-05
  -1.0000000e-05
  -1.0000000e-05
  -1.0000000e-05
  -1.0000000e-05
  -1.0000000e-05
  -1.0000000e-05
  -1.0000000e-05
  -1.0000000e-05
  -1.0000000e-05
  -1.0000000e-05
  -1.0000000e-05
  -1.0000000e-05
  -1.0000000e-05
  -1.0000000e-05
  -1.0000000e-05
  -1.0000000e-05
  -1.0000000e-05
  -1.0000000e-05
  -1.0000000e-05
  -1.0000000e-05
  -1.0000000e-05
  -1.0000000e-05
  -1.0000000e-05
  -1.0000000e-05
  -1.0000000e-05
  -1.0000000e-05
  -1.0000000e-05
  -1.0000000e-05
  -1.0000000e-05
  -1.0000000e-05
  -1.0000000e-05
  -1.0000000e-05
  -1.0000000e-05
  -1.0000000e-05
  -1.0000000e-05
  -1.0000000e-05
  -1.0000000e-05
  -1.0000000e-05
  -1.0000000e-05
  -1.0000000e-05
  -1.0000000e-05
  -1.0000000e-05
  -1.0000000e-05
  -1.0000000e-05
  -1.0000000e-05
  -1.0000000e-05
  -1.0000000e-05
  -1.0000000e-05
  -1.0000000e-05
  -1.0000000e-05
  -1.0000000e-05
  -1.0000000e-05
  -1.0000000e-05
  -1.0000000e-05
  -1.0000000e-05
  -1.0000000e-05
  -1.0000000e-05
  -1.0000000e-05
  -1.0000000e-05
  -1.0000000e-05
  -1.0000000e-05
  -1.0000000e-05
  -1.0000000e-05
  -1.0000000e-05
  -1.0000000e-05
  -1.0000000e-05
  -1.0000000e-05
  -1.0000000e-05
  -1.0000000e-05
  -1.0000000e-05
  -1.0000000e-05
  -1.0000000e-05
  -1.0000000e-05
  -1.0000000e-05
  -1.0000000e-05
  -1.0000000e-05
  -1.0000000e-05
  -1.0000000e-05
  -1.0000000e-05
  -1.0000000e-05
  -1.0000000e-05
  -1.0000000e-05
  -1.0000000e-05
  -1.0000000e-05
  -1.0000000e-05
  -1.0000000e-05
  -1.0000000e-05
  -1.0000000e-05
  -1.0000000e-05
  -1.0000000e-05
  -1.0000000e-05
  -1.0000000e-05
  -1.0000000e-05
  -1.0000000e-05
  -1.0000000e-05
  -1.0000000e-05
  -1.0000000e-05
  -1.0000000e-05
  -1.0000000e-05
  -1.0000000e-05
  -1.0000000e-05
  -1.0000000e-05
  -1.0000000e-05
  -1.0000000e-05
  -1.0000000e-05
  -1.0000000e-05
  -1.0000000e-05
  -1.0000000e-05
  -1.0000000e-05
  -1.0000000e-05
  -1.0000000e-05
  -1.0000000e-05
  -1.0000000e-05
  -1.0000000e-05
  -1.0000000e-05
  -1.0000000e-05
  -1.0000000e-05
  -1.0000000e-05
  -1.0000000e-05
  -1.0000000e-05
  -1.0000000e-05
  -1.0000000e-05
  -1.0000000e-05
  -1.0000000e-05
  -1.0000000e-05
  -1.0000000e-05
  -1.0000000e-05
  -1.0000000e-05
  -1.0000000e-05
  -1.0000000e-05
  -1.0000000e-05
  -1.0000000e-05
  -1.0000000e-05
  -1.0000000e-05
  -1.0000000e-05
  -1.0000000e-05
  -1.0000000e-05
  -1.0000000e-05
  -1.0000000e-05
  -1.0000000e-05
  -1.0000000e-05
  -1.0000000e-05
  -1.0000000e-05
  -1.0000000e-05
  -1.0000000e-05
  -1.0000000e-05
  -1.0000000e-05
  -1.0000000e-05
  -1.0000000e-05
  -1.0000000e-05
  -1.0000000e-05
  -1.0000000e-05
  -1.0000000e-05
  -1.0000000e-05
  -1.0000000e-05
  -1.0000000e-05
  -1.0000000e-05
  -1.0000000e-05
  -1.0000000e-05
  -1.0000000e-05
  -1.0000000e-05
  -1.0000000e-05
  -1.0000000e-05
  -1.0000000e-05
  -1.0000000e-05
  -1.0000000e-05
  -1.0000000e-05
  -1.0000000e-05
  -1.0000000e-05
  -1.0000000e-05
  -1.0000000e-05
  -1.0000000e-05
  -1.0000000e-05
  -1.0000000e-05
  -1.0000000e-05
  -1.0000000e-05
  -1.0000000e-05
  -1.0000000e-05
  -1.0000000e-05
  -1.0000000e-05
  -1.0000000e-05
  -1.0000000e-05
  -1.0000000e-05
  -1.0000000e-05
  -1.0000000e-05
  -1.0000000e-05
  -1.0000000e-05
  -1.0000000e-05
  -1.0000000e-05
  -1.0000000e-05
  -1.0000000e-05
  -1.0000000e-05
  -1.0000000e-05
  -1.0000000e-05
  -1.0000000e-05
  -1.0000000e-05
  -1.0000000e-05
  -1.0000000e-05
  -1.0000000e-05
  -1.0000000e-05
  -1.0000000e-05
  -1.0000000e-05
  -1.0000000e-05
  -1.0000000e-05
  -1.0000000e-05
  -1.0000000e-05
  -1.0000000e-05
  -1.0000000e-05
  -1.0000000e-05
  -1.0000000e-05
  -1.0000000e-05
  -1.0000000e-05
  -1.0000000e-05
  -1.0000000e-05
  -1.0000000e-05
  -1.0000000e-05
  -1.0000000e-05
  -1.0000000e-05
  -1.0000000e-05
  -1.0000000e-05
  -1.0000000e-05
  -1.0000000e-05
  -1.0000000e-05
  -1.0000000e-05
  -1.0000000e-05
  -1.0000000e-05
  -1.0000000e-05
  -1.0000000e-05
  -1.0000000e-05
  -1.0000000e-05
  -1.0000000e-05
  -1.0000000e-05
  -1.0000000e-05
  -1.0000000e-05
  -1.0000000e-05
  -1.0000000e-05
  -1.0000000e-05
  -1.0000000e-05
  -1.0000000e-05
  -1.0000000e-05
  -1.0000000e-05
  -1.0000000e-05
  -1.0000000e-05
  -1.0000000e-05
  -1.0000000e-05
  -1.0000000e-05
  -1.0000000e-05
  -1.0000000e-05
  -1.0000000e-05
  -1.0000000e-05
  -1.0000000e-05
  -1.0000000e-05
  -1.0000000e-05
  -1.0000000e-05
  -1.0000000e-05
  -1.0000000e-05
  -1.0000000e-05
  -1.0000000e-05
  -1.0000000e-05
  -1.0000000e-05
  -1.0000000e-05
  -1.0000000e-05
  -1.0000000e-05
  -1.0000000e-05
  -1.0000000e-05
  -1.0000000e-05
  -1.0000000e-05
  -1.0000000e-05
  -1.0000000e-05
  -1.0000000e-05
  -1.0000000e-05
  -1.0000000e-05
  -1.0000000e-05
  -1.0000000e-05
  -1.0000000e-05
  -1.0000000e-05
  -1.0000000e-05
  -1.0000000e-05
  -1.0000000e-05
  -1.0000000e-05
  -1.0000000e-05
  -1.0000000e-05
  -1.0000000e-05
  -1.0000000e-05
  -1.0000000e-05
  -1.0000000e-05
  -1.0000000e-05
  -1.0000000e-05
  -1.0000000e-05
  -1.0000000e-05
  -1.0000000e-05
  -1.0000000e-05
  -1.0000000e-05
  -1.0000000e-05
  -1.0000000e-05
  -1.0000000e-05
  -1.0000000e-05
  -1.0000000e-05
  -1.0000000e-05
  -1.0000000e-05
  -1.0000000e-05
  -1.0000000e-05
  -1.0000000e-05
  -1.0000000e-05
  -1.0000000e-05
  -1.0000000e-05
  -1.0000000e-05
  -1.0000000e-05
  -1.0000000e-05
  -1.0000000e-05
  -1.0000000e-05
  -1.0000000e-05
  -1.0000000e-05
  -1.0000000e-05
  -1.0000000e-05
  -1.0000000e-05
  -1.0000000e-05
  -1.0000000e-05
  -1.0000000e-05
  -1.0000000e-05
  -1.0000000e-05
  -1.0000000e-05
  -1.0000000e-05
  -1.0000000e-05
  -1.0000000e-05
  -1.0000000e-05
  -1.0000000e-05
  -1.0000000e-05
  -1.0000000e-05
  -1.0000000e-05
  -1.0000000e-05
  -1.0000000e-05
  -1.0000000e-05
  -1.0000000e-05
  -1.0000000e-05
  -1.0000000e-05
  -1.0000000e-05
  -1.0000000e-05
  -1.0000000e-05
  -1.0000000e-05
  -1.0000000e-05
  -1.0000000e-05
  -1.0000000e-05
  -1.0000000e-05
  -1.0000000e-05
  -1.0000000e-05
  -1.0000000e-05
  -1.0000000e-05
  -1.0000000e-05
  -1.0000000e-05
  -1.0000000e-05
  -1.0000000e-05
  -1.0000000e-05
  -1.0000000e-05
  -1.0000000e-05
  -1.0000000e-05
  -1.0000000e-05
  -1.0000000e-05
  -1.0000000e-05
  -1.0000000e-05
  -1.0000000e-05
  -1.0000000e-05
  -1.0000000e-05
  -1.0000000e-05
  -1.0000000e-05
  -1.0000000e-05
  -1.0000000e-05
  -1.0000000e-05
  -1.0000000e-05
  -1.0000000e-05
  -1.0000000e-05
  -1.0000000e-05
  -1.0000000e-05
  -1.0000000e-05
  -1.0000000e-05
  -1.0000000e-05
  -1.0000000e-05
  -1.0000000e-05
  -1.0000000e-05
  -1.0000000e-05
  -1.0000000e-05
  -1.0000000e-05
  -1.0000000e-05
  -1.0000000e-05
  -1.0000000e-05
  -1.0000000e-05
  -1.0000000e-05
  -1.0000000e-05
  -1.0000000e-05
  -1.0000000e-05
  -1.0000000e-05
  -1.0000000e-05
  -1.0000000e-05
  -1.0000000e-05
  -1.0000000e-05
  -1.0000000e-05
  -1.0000000e-05
  -1.0000000e-05
  -1.0000000e-05
  -1.0000000e-05
  -1.0000000e-05
  -1.0000000e-05
  -1.0000000e-05
  -1.0000000e-05
  -1.0000000e-05
  -1.0000000e-05
  -1.0000000e-05
  -1.0000000e-05
  -1.0000000e-05
  -1.0000000e-05
  -1.0000000e-05
  -1.0000000e-05
  -1.0000000e-05
  -1.0000000e-05
  -1.0000000e-05
  -1.0000000e-05
  -1.0000000e-05
  -1.0000000e-05
  -1.0000000e-05
  -1.0000000e-05
  -1.0000000e-05
  -1.0000000e-05
  -1.0000000e-05
  -1.0000000e-05
  -1.0000000e-05
  -1.0000000e-05
  -1.0000000e-05
  -1.0000000e-05
  -1.0000000e-05
  -1.0000000e-05
  -1.0000000e-05
  -1.0000000e-05
  -1.0000000e-05
  -1.0000000e-05
  -1.0000000e-05
  -1.0000000e-05
  -1.0000000e-05
  -1.0000000e-05
  -1.0000000e-05
  -1.0000000e-05
  -1.0000000e-05
  -1.0000000e-05
  -1.0000000e-05
  -1.0000000e-05
  -1.0000000e-05
  -1.0000000e-05
  -1.0000000e-05
  -1.0000000e-05
  -1.0000000e-05
  -1.0000000e-05
  -1.0000000e-05
  -1.0000000e-05
  -1.0000000e-05
  -1.0000000e-05
  -1.0000000e-05
  -1.0000000e-05
  -1.0000000e-05
  -1.0000000e-05
  -1.0000000e-05
  -1.0000000e-05
  -1.0000000e-05
  -1.0000000e-05
  -1.0000000e-05
  -1.0000000e-05
  -1.0000000e-05
  -1.0000000e-05
  -1.0000000e-05
  -1.0000000e-05
  -1.0000000e-05
  -1.0000000e-05
  -1.0000000e-05
  -1.0000000e-05
  -1.0000000e-05
  -1.0000000e-05
  -1.0000000e-05
  -1.0000000e-05
  -1.0000000e-05
  -1.0000000e-05
  -1.0000000e-05
  -1.0000000e-05
  -1.0000000e-05
  -1.0000000e-05
  -1.0000000e-05
  -1.0000000e-05
  -1.0000000e-05
  -1.0000000e-05
  -1.0000000e-05
  -1.0000000e-05
  -1.0000000e-05
  -1.0000000e-05
  -1.0000000e-05
  -1.0000000e-05
  -1.0000000e-05
  -1.0000000e-05
  -1.0000000e-05
  -1.0000000e-05
  -1.0000000e-05
  -1.0000000e-05
  -1.0000000e-05
  -1.0000000e-05
  -1.0000000e-05
  -1.0000000e-05
  -1.0000000e-05
  -1.0000000e-05
  -1.0000000e-05
  -1.0000000e-05
  -1.0000000e-05
  -1.0000000e-05
  -1.0000000e-05
  -1.0000000e-05
  -1.0000000e-05
  -1.0000000e-05
  -1.0000000e-05
  -1.0000000e-05
  -1.0000000e-05
  -1.0000000e-05
  -1.0000000e-05
  -1.0000000e-05
  -1.0000000e-05
  -1.0000000e-05
  -1.0000000e-05
  -1.0000000e-05
  -1.0000000e-05
  -1.0000000e-05
  -1.0000000e-05
  -1.0000000e-05
  -1.0000000e-05
  -1.0000000e-05
  -1.0000000e-05
  -1.0000000e-05
  -1.0000000e-05
  -1.0000000e-05
  -1.0000000e-05
  -1.0000000e-05
  -1.0000000e-05
  -1.0000000e-05
  -1.0000000e-05
  -1.0000000e-05
  -1.0000000e-05
  -1.0000000e-05
  -1.0000000e-05
  -1.0000000e-05
  -1.0000000e-05
  -1.0000000e-05
  -1.0000000e-05
  -1.0000000e-05
  -1.0000000e-05
  -1.0000000e-05
  -1.0000000e-05
  -1.0000000e-05
  -1.0000000e-05
  -1.0000000e-05
  -1.0000000e-05
  -1.0000000e-05
  -1.0000000e-05
  -1.0000000e-05
  -1.0000000e-05
  -1.0000000e-05
  -1.0000000e-05
  -1.0000000e-05
  -1.0000000e-05
  -1.0000000e-05
  -1.0000000e-05
  -1.0000000e-05
  -1.0000000e-05
  -1.0000000e-05
  -1.0000000e-05
  -1.0000000e-05
  -1.0000000e-05
  -1.0000000e-05
  -1.0000000e-05
  -1.0000000e-05
  -1.0000000e-05
  -1.0000000e-05
  -1.0000000e-05
  -1.0000000e-05
  -1.0000000e-05
  -1.0000000e-05
  -1.0000000e-05
  -1.0000000e-05
  -1.0000000e-05
  -1.0000000e-05
  -1.0000000e-05
  -1.0000000e-05
  -1.0000000e-05
  -1.0000000e-05
  -1.0000000e-05
  -1.0000000e-05
  -1.0000000e-05
  -1.0000000e-05
  -1.0000000e-05
  -1.0000000e-05
  -1.0000000e-05
  -1.0000000e-05
  -1.0000000e-05
  -1.0000000e-05
  -1.0000000e-05
  -1.0000000e-05
  -1.0000000e-05
  -1.0000000e-05
  -1.0000000e-05
  -1.0000000e-05
  -1.0000000e-05
  -1.0000000e-05
  -1.0000000e-05
  -1.0000000e-05
  -1.0000000e-05
  -1.0000000e-05
  -1.0000000e-05
  -1.0000000e-05
  -1.0000000e-05
  -1.0000000e-05
  -1.0000000e-05
  -1.0000000e-05
  -1.0000000e-05
  -1.0000000e-05
  -1.0000000e-05
  -1.0000000e-05
  -1.0000000e-05
  -1.0000000e-05
  -1.0000000e-05
  -1.0000000e-05
  -1.0000000e-05
  -1.0000000e-05
  -1.0000000e-05
  -1.0000000e-05
  -1.0000000e-05
  -1.0000000e-05
  -1.0000000e-05
  -1.0000000e-05
  -1.0000000e-05
  -1.0000000e-05
  -1.0000000e-05
  -1.0000000e-05
  -1.0000000e-05
  -1.0000000e-05
  -1.0000000e-05
  -1.0000000e-05
  -1.0000000e-05
  -1.0000000e-05
  -1.0000000e-05
  -1.0000000e-05
  -1.0000000e-05
  -1.0000000e-05
  -1.0000000e-05
  -1.0000000e-05
  -1.0000000e-05
  -1.0000000e-05
  -1.0000000e-05
  -1.0000000e-05
  -1.0000000e-05
  -1.0000000e-05
  -1.0000000e-05
  -1.0000000e-05
  -1.0000000e-05
  -1.0000000e-05
  -1.0000000e-05
  -1.0000000e-05
  -1.0000000e-05
  -1.0000000e-05
  -1.0000000e-05
  -1.0000000e-05
  -1.0000000e-05
  -1.0000000e-05
  -1.0000000e-05
  -1.0000000e-05
  -1.0000000e-05
  -1.0000000e-05
  -1.0000000e-05
  -1.0000000e-05
  -1.0000000e-05
  -1.0000000e-05
  -1.0000000e-05
  -1.0000000e-05
  -1.0000000e-05
  -1.0000000e-05
  -1.0000000e-05
  -1.0000000e-05
  -1.0000000e-05
  -1.0000000e-05
  -1.0000000e-05
  -1.0000000e-05
  -1.0000000e-05
  -1.0000000e-05
  -1.0000000e-05
  -1.0000000e-05
  -1.0000000e-05
  -1.0000000e-05
  -1.0000000e-05
  -1.0000000e-05
  -1.0000000e-05
  -1.0000000e-05
  -1.0000000e-05
  -1.0000000e-05
  -1.0000000e-05
  -1.0000000e-05
  -1.0000000e-05
  -1.0000000e-05
  -1.0000000e-05
  -1.0000000e-05
  -1.0000000e-05
  -1.0000000e-05
  -1.0000000e-05
  -1.0000000e-05
  -1.0000000e-05
  -1.0000000e-05
  -1.0000000e-05
  -1.0000000e-05
  -1.0000000e-05
  -1.0000000e-05
  -1.0000000e-05
  -1.0000000e-05
  -1.0000000e-05
  -1.0000000e-05
  -1.0000000e-05
  -1.0000000e-05
  -1.0000000e-05
  -1.0000000e-05
  -1.0000000e-05
  -1.0000000e-05
  -1.0000000e-05
  -1.0000000e-05
  -1.0000000e-05
  -1.0000000e-05
  -1.0000000e-05
  -1.0000000e-05
  -1.0000000e-05
  -1.0000000e-05
  -1.0000000e-05
  -1.0000000e-05
  -1.0000000e-05
  -1.0000000e-05
  -1.0000000e-05
  -1.0000000e-05
  -1.0000000e-05
  -1.0000000e-05
  -1.0000000e-05
  -1.0000000e-05
  -1.0000000e-05
  -1.0000000e-05
  -1.0000000e-05
  -1.0000000e-05
  -1.0000000e-05
  -1.0000000e-05
  -1.0000000e-05
  -1.0000000e-05
  -1.0000000e-05
  -1.0000000e-05
  -1.0000000e-05
  -1.0000000e-05
  -1.0000000e-05
  -1.0000000e-05
  -1.0000000e-05
  -1.0000000e-05
  -1.0000000e-05
  -1.0000000e-05
  -1.0000000e-05
  -1.0000000e-05
  -1.0000000e-05
  -1.0000000e-05
  -1.0000000e-05
  -1.0000000e-05
  -1.0000000e-05
  -1.0000000e-05
  -1.0000000e-05
  -1.0000000e-05
  -1.0000000e-05
  -1.0000000e-05
  -1.0000000e-05
  -1.0000000e-05
  -1.0000000e-05
  -1.0000000e-05
  -1.0000000e-05
  -1.0000000e-05
  -1.0000000e-05
  -1.0000000e-05
  -1.0000000e-05
  -1.0000000e-05
  -1.0000000e-05
  -1.0000000e-05
  -1.0000000e-05
  -1.0000000e-05
  -1.0000000e-05
  -1.0000000e-05
  -1.0000000e-05
  -1.0000000e-05
  -1.0000000e-05
  -1.0000000e-05
  -1.0000000e-05
  -1.0000000e-05
  -1.0000000e-05
  -1.0000000e-05
  -1.0000000e-05
  -1.0000000e-05
  -1.0000000e-05
  -1.0000000e-05
  -1.0000000e-05
  -1.0000000e-05
  -1.0000000e-05
  -1.0000000e-05
  -1.0000000e-05
  -1.0000000e-05
  -1.0000000e-05
  -1.0000000e-05
  -1.0000000e-05
  -1.0000000e-05
  -1.0000000e-05
  -1.0000000e-05
  -1.0000000e-05
  -1.0000000e-05
  -1.0000000e-05
  -1.0000000e-05
  -1.0000000e-05
  -1.0000000e-05
  -1.0000000e-05
  -1.0000000e-05
  -1.0000000e-05
  -1.0000000e-05
  -1.0000000e-05
  -1.0000000e-05
  -1.0000000e-05
  -1.0000000e-05
  -1.0000000e-05
  -1.0000000e-05
  -1.0000000e-05
  -1.0000000e-05
  -1.0000000e-05
  -1.0000000e-05
  -1.0000000e-05
  -1.0000000e-05
  -1.0000000e-05
  -1.0000000e-05
  -1.0000000e-05
  -1.0000000e-05
  -1.0000000e-05
  -1.0000000e-05
  -1.0000000e-05
  -1.0000000e-05
  -1.0000000e-05
  -1.0000000e-05
  -1.0000000e-05
  -1.0000000e-05
  -1.0000000e-05
  -1.0000000e-05
  -1.0000000e-05
  -1.0000000e-05
  -1.0000000e-05
  -1.0000000e-05
  -1.0000000e-05
  -1.0000000e-05
  -1.0000000e-05
  -1.0000000e-05
  -1.0000000e-05
  -1.0000000e-05
  -1.0000000e-05
  -1.0000000e-05
  -1.0000000e-05
  -1.0000000e-05
  -1.0000000e-05
  -1.0000000e-05
  -1.0000000e-05
  -1.0000000e-05
  -1.0000000e-05
  -1.0000000e-05
  -1.0000000e-05
  -1.0000000e-05
  -1.0000000e-05
  -1.0000000e-05
  -1.0000000e-05
  -1.0000000e-05
  -1.0000000e-05
  -1.0000000e-05
  -1.0000000e-05
  -1.0000000e-05
  -1.0000000e-05
  -1.0000000e-05
  -1.0000000e-05
  -1.0000000e-05
  -1.0000000e-05
  -1.0000000e-05
  -1.0000000e-05
  -1.0000000e-05
  -1.0000000e-05
  -1.0000000e-05
  -1.0000000e-05
  -1.0000000e-05
  -1.0000000e-05
  -1.0000000e-05
  -1.0000000e-05
  -1.0000000e-05
  -1.0000000e-05
  -1.0000000e-05
  -1.0000000e-05
  -1.0000000e-05
  -1.0000000e-05
  -1.0000000e-05
  -1.0000000e-05
  -1.0000000e-05
  -1.0000000e-05
  -1.0000000e-05
  -1.0000000e-05
  -1.0000000e-05
  -1.0000000e-05
  -1.0000000e-05
  -1.0000000e-05
  -1.0000000e-05
  -1.0000000e-05
  -1.0000000e-05
  -1.0000000e-05
  -1.0000000e-05
  -1.0000000e-05
  -1.0000000e-05
  -1.0000000e-05
  -1.0000000e-05
  -1.0000000e-05
  -1.0000000e-05
  -1.0000000e-05
  -1.0000000e-05
  -1.0000000e-05
  -1.0000000e-05
  -1.0000000e-05
  -1.0000000e-05
  -1.0000000e-05
  -1.0000000e-05
  -1.0000000e-05
  -1.0000000e-05
  -1.0000000e-05
  -1.0000000e-05
  -1.0000000e-05
  -1.0000000e-05
  -1.0000000e-05
  -1.0000000e-05
  -1.0000000e-05
  -1.0000000e-05
  -1.0000000e-05
  -1.0000000e-05
  -1.0000000e-05
  -1.0000000e-05
  -1.0000000e-05
  -1.0000000e-05
  -1.0000000e-05
  -1.0000000e-05
  -1.0000000e-05
  -1.0000000e-05
  -1.0000000e-05
  -1.0000000e-05
  -1.0000000e-05
  -1.0000000e-05
  -1.0000000e-05
  -1.0000000e-05
  -1.0000000e-05
  -1.0000000e-05
  -1.0000000e-05
  -1.0000000e-05
  -1.0000000e-05
  -1.0000000e-05
  -1.0000000e-05
  -1.0000000e-05
  -1.0000000e-05
  -1.0000000e-05
  -1.0000000e-05
  -1.0000000e-05
  -1.0000000e-05
  -1.0000000e-05
  -1.0000000e-05
  -1.0000000e-05
  -1.0000000e-05
  -1.0000000e-05
  -1.0000000e-05
  -1.0000000e-05
  -1.0000000e-05
  -1.0000000e-05
  -1.0000000e-05
  -1.0000000e-05
  -1.0000000e-05
  -1.0000000e-05
  -1.0000000e-05
  -1.0000000e-05
  -1.0000000e-05
  -1.0000000e-05
  -1.0000000e-05
  -1.0000000e-05
  -1.0000000e-05
  -1.0000000e-05
  -1.0000000e-05
  -1.0000000e-05
  -1.0000000e-05
  -1.0000000e-05
  -1.0000000e-05
  -1.0000000e-05
  -1.0000000e-05
  -1.0000000e-05
  -1.0000000e-05
  -1.0000000e-05
  -1.0000000e-05
  -1.0000000e-05
  -1.0000000e-05
  -1.0000000e-05
  -1.0000000e-05
  -1.0000000e-05
  -1.0000000e-05
  -1.0000000e-05
  -1.0000000e-05
  -1.0000000e-05
  -1.0000000e-05
  -1.0000000e-05
  -1.0000000e-05
  -1.0000000e-05
  -1.0000000e-05
  -1.0000000e-05
  -1.0000000e-05
  -1.0000000e-05
  -1.0000000e-05
  -1.0000000e-05
  -1.0000000e-05
  -1.0000000e-05
  -1.0000000e-05
  -1.0000000e-05
  -1.0000000e-05
  -1.0000000e-05
  -1.0000000e-05
  -1.0000000e-05
  -1.0000000e-05
  -1.0000000e-05
  -1.0000000e-05
  -1.0000000e-05
  -1.0000000e-05
  -1.0000000e-05
  -1.0000000e-05
  -1.0000000e-05
  -1.0000000e-05
  -1.0000000e-05
  -1.0000000e-05
  -1.0000000e-05
  -1.0000000e-05
  -1.0000000e-05
  -1.0000000e-05
  -1.0000000e-05
  -1.0000000e-05
  -1.0000000e-05
  -1.0000000e-05
  -1.0000000e-05
  -1.0000000e-05
  -1.0000000e-05
  -1.0000000e-05
  -1.0000000e-05
  -1.0000000e-05
  -1.0000000e-05
  -1.0000000e-05
  -1.0000000e-05
  -1.0000000e-05
  -1.0000000e-05
  -1.0000000e-05
  -1.0000000e-05
  -1.0000000e-05
  -1.0000000e-05
  -1.0000000e-05
  -1.0000000e-05
  -1.0000000e-05
  -1.0000000e-05
  -1.0000000e-05
  -1.0000000e-05
  -1.0000000e-05
  -1.0000000e-05
  -1.0000000e-05
  -1.0000000e-05
  -1.0000000e-05
  -1.0000000e-05
  -1.0000000e-05
  -1.0000000e-05
  -1.0000000e-05
  -1.0000000e-05
  -1.0000000e-05
  -1.0000000e-05
  -1.0000000e-05
  -1.0000000e-05
  -1.0000000e-05
  -1.0000000e-05
  -1.0000000e-05
  -1.0000000e-05
  -1.0000000e-05
  -1.0000000e-05
  -1.0000000e-05
  -1.0000000e-05
  -1.0000000e-05
  -1.0000000e-05
  -1.0000000e-05
  -1.0000000e-05
  -1.0000000e-05
  -1.0000000e-05
  -1.0000000e-05
  -1.0000000e-05
  -1.0000000e-05
  -1.0000000e-05
  -1.0000000e-05
  -1.0000000e-05
  -1.0000000e-05
  -1.0000000e-05
  -1.0000000e-05
  -1.0000000e-05
  -1.0000000e-05
  -1.0000000e-05
  -1.0000000e-05
  -1.0000000e-05
  -1.0000000e-05
  -1.0000000e-05
  -1.0000000e-05
  -1.0000000e-05
  -1.0000000e-05
  -1.0000000e-05
  -1.0000000e-05
  -1.0000000e-05
  -1.0000000e-05
  -1.0000000e-05
  -1.0000000e-05
  -1.0000000e-05
  -1.0000000e-05
  -1.0000000e-05
  -1.0000000e-05
  -1.0000000e-05
  -1.0000000e-05
  -1.0000000e-05
  -1.0000000e-05
  -1.0000000e-05
  -1.0000000e-05
  -1.0000000e-05
  -1.0000000e-05
  -1.0000000e-05
  -1.0000000e-05
  -1.0000000e-05
  -1.0000000e-05
  -1.0000000e-05
  -1.0000000e-05
  -1.0000000e-05
  -1.0000000e-05
  -1.0000000e-05
  -1.0000000e-05
  -1.0000000e-05
  -1.0000000e-05
  -1.0000000e-05
  -1.0000000e-05
  -1.0000000e-05
  -1.0000000e-05
  -1.0000000e-05
  -1.0000000e-05
  -1.0000000e-05
  -1.0000000e-05
  -1.0000000e-05
  -1.0000000e-05
  -1.0000000e-05
  -1.0000000e-05
  -1.0000000e-05
  -1.0000000e-05
  -1.0000000e-05
  -1.0000000e-05
  -1.0000000e-05
  -1.0000000e-05
  -1.0000000e-05
  -1.0000000e-05
  -1.0000000e-05
  -1.0000000e-05
  -1.0000000e-05
  -1.0000000e-05
  -1.0000000e-05
  -1.0000000e-05
  -1.0000000e-05
  -1.0000000e-05
  -1.0000000e-05
  -1.0000000e-05
  -1.0000000e-05
  -1.0000000e-05
  -1.0000000e-05
  -1.0000000e-05
  -1.0000000e-05
  -1.0000000e-05
  -1.0000000e-05
  -1.0000000e-05
  -1.0000000e-05
  -1.0000000e-05
  -1.0000000e-05
  -1.0000000e-05
  -1.0000000e-05
  -1.0000000e-05
  -1.0000000e-05
  -1.0000000e-05
  -1.0000000e-05
  -1.0000000e-05
  -1.0000000e-05
  -1.0000000e-05
  -1.0000000e-05
  -1.0000000e-05
  -1.0000000e-05
  -1.0000000e-05
  -1.0000000e-05
  -1.0000000e-05
  -1.0000000e-05
  -1.0000000e-05
  -1.0000000e-05
  -1.0000000e-05
  -1.0000000e-05
  -1.0000000e-05
  -1.0000000e-05
  -1.0000000e-05
  -1.0000000e-05
  -1.0000000e-05
  -1.0000000e-05
  -1.0000000e-05
  -1.0000000e-05
  -1.0000000e-05
  -1.0000000e-05
  -1.0000000e-05
  -1.0000000e-05
  -1.0000000e-05
  -1.0000000e-05
  -1.0000000e-05
  -1.0000000e-05
  -1.0000000e-05
  -1.0000000e-05
  -1.0000000e-05
  -1.0000000e-05
  -1.0000000e-05
  -1.0000000e-05
  -1.0000000e-05
  -1.0000000e-05
  -1.0000000e-05
  -1.0000000e-05
  -1.0000000e-05
  -1.0000000e-05
  -1.0000000e-05
  -1.0000000e-05
  -1.0000000e-05
  -1.0000000e-05
  -1.0000000e-05
  -1.0000000e-05
  -1.0000000e-05
  -1.0000000e-05
  -1.0000000e-05
  -1.0000000e-05
  -1.0000000e-05
  -1.0000000e-05
  -1.0000000e-05
  -1.0000000e-05
  -1.0000000e-05
  -1.0000000e-05
  -1.0000000e-05
  -1.0000000e-05
  -1.0000000e-05
  -1.0000000e-05
  -1.0000000e-05
  -1.0000000e-05
  -1.0000000e-05
  -1.0000000e-05
  -1.0000000e-05
  -1.0000000e-05
  -1.0000000e-05
  -1.0000000e-05
  -1.0000000e-05
  -1.0000000e-05
  -1.0000000e-05
  -1.0000000e-05
  -1.0000000e-05
  -1.0000000e-05
  -1.0000000e-05
  -1.0000000e-05
  -1.0000000e-05
  -1.0000000e-05
  -1.0000000e-05
  -1.0000000e-05
  -1.0000000e-05
  -1.0000000e-05
  -1.0000000e-05
  -1.0000000e-05
  -1.0000000e-05
  -1.0000000e-05
  -1.0000000e-05
  -1.0000000e-05
  -1.0000000e-05
  -1.0000000e-05
  -1.0000000e-05
  -1.0000000e-05
  -1.0000000e-05
  -1.0000000e-05
  -1.0000000e-05
  -1.0000000e-05
  -1.0000000e-05
  -1.0000000e-05
  -1.0000000e-05
  -1.0000000e-05
  -1.0000000e-05
  -1.0000000e-05
  -1.0000000e-05
  -1.0000000e-05
  -1.0000000e-05
  -1.0000000e-05
  -1.0000000e-05
  -1.0000000e-05
  -1.0000000e-05
  -1.0000000e-05
  -1.0000000e-05
  -1.0000000e-05
  -1.0000000e-05
  -1.0000000e-05
  -1.0000000e-05
  -1.0000000e-05
  -1.0000000e-05
  -1.0000000e-05
  -1.0000000e-05
  -1.0000000e-05
  -1.0000000e-05
  -1.0000000e-05
  -1.0000000e-05
  -1.0000000e-05
  -1.0000000e-05
  -1.0000000e-05
  -1.0000000e-05
  -1.0000000e-05
  -1.0000000e-05
  -1.0000000e-05
  -1.0000000e-05
  -1.0000000e-05
  -1.0000000e-05
  -1.0000000e-05
  -1.0000000e-05
  -1.0000000e-05
  -1.0000000e-05
  -1.0000000e-05
  -1.0000000e-05
  -1.0000000e-05
  -1.0000000e-05
  -1.0000000e-05
  -1.0000000e-05
  -1.0000000e-05
  -1.0000000e-05
  -1.0000000e-05
  -1.0000000e-05
  -1.0000000e-05
  -1.0000000e-05
  -1.0000000e-05
  -1.0000000e-05
  -1.0000000e-05
  -1.0000000e-05
  -1.0000000e-05
  -1.0000000e-05
  -1.0000000e-05
  -1.0000000e-05
  -1.0000000e-05
  -1.0000000e-05
  -1.0000000e-05
  -1.0000000e-05
  -1.0000000e-05
  -1.0000000e-05
  -1.0000000e-05
  -1.0000000e-05
  -1.0000000e-05
  -1.0000000e-05
  -1.0000000e-05
  -1.0000000e-05
  -1.0000000e-05
  -1.0000000e-05
  -1.0000000e-05
  -1.0000000e-05
  -1.0000000e-05
  -1.0000000e-05
  -1.0000000e-05
  -1.0000000e-05
  -1.0000000e-05
  -1.0000000e-05
  -1.0000000e-05
  -1.0000000e-05
  -1.0000000e-05
  -1.0000000e-05
  -1.0000000e-05
  -1.0000000e-05
  -1.0000000e-05
  -1.0000000e-05
  -1.0000000e-05
  -1.0000000e-05
  -1.0000000e-05
  -1.0000000e-05
  -1.0000000e-05
  -1.0000000e-05
  -1.0000000e-05
  -1.0000000e-05
  -1.0000000e-05
  -1.0000000e-05
  -1.0000000e-05
  -1.0000000e-05
  -1.0000000e-05
  -1.0000000e-05
  -1.0000000e-05
  -1.0000000e-05
  -1.0000000e-05
  -1.0000000e-05
  -1.0000000e-05
  -1.0000000e-05
  -1.0000000e-05
  -1.0000000e-05
  -1.0000000e-05
  -1.0000000e-05
  -1.0000000e-05
  -1.0000000e-05
  -1.0000000e-05
  -1.0000000e-05
  -1.0000000e-05
  -1.0000000e-05
  -1.0000000e-05
  -1.0000000e-05
  -1.0000000e-05
  -1.0000000e-05
  -1.0000000e-05
  -1.0000000e-05
  -1.0000000e-05
  -1.0000000e-05
  -1.0000000e-05
  -1.0000000e-05
  -1.0000000e-05
  -1.0000000e-05
  -1.0000000e-05
  -1.0000000e-05
  -1.0000000e-05
  -1.0000000e-05
  -1.0000000e-05
  -1.0000000e-05
  -1.0000000e-05
  -1.0000000e-05
  -1.0000000e-05
  -1.0000000e-05
  -1.0000000e-05
  -1.0000000e-05
  -1.0000000e-05
  -1.0000000e-05
  -1.0000000e-05
  -1.0000000e-05
  -1.0000000e-05
  -1.0000000e-05
  -1.0000000e-05
  -1.0000000e-05
  -1.0000000e-05
  -1.0000000e-05
  -1.0000000e-05
  -1.0000000e-05
  -1.0000000e-05
  -1.0000000e-05
  -1.0000000e-05
  -1.0000000e-05
  -1.0000000e-05
  -1.0000000e-05
  -1.0000000e-05
  -1.0000000e-05
  -1.0000000e-05
  -1.0000000e-05
  -1.0000000e-05
  -1.0000000e-05
  -1.0000000e-05
  -1.0000000e-05
  -1.0000000e-05
  -1.0000000e-05
  -1.0000000e-05
  -1.0000000e-05
  -1.0000000e-05
  -1.0000000e-05
  -1.0000000e-05
  -1.0000000e-05
  -1.0000000e-05
  -1.0000000e-05
  -1.0000000e-05
  -1.0000000e-05
  -1.0000000e-05
  -1.0000000e-05
  -1.0000000e-05
  -1.0000000e-05
  -1.0000000e-05
  -1.0000000e-05
  -1.0000000e-05
  -1.0000000e-05
  -1.0000000e-05
  -1.0000000e-05
  -1.0000000e-05
  -1.0000000e-05
  -1.0000000e-05
  -1.0000000e-05
  -1.0000000e-05
  -1.0000000e-05
  -1.0000000e-05
  -1.0000000e-05
  -1.0000000e-05
  -1.0000000e-05
  -1.0000000e-05
  -1.0000000e-05
  -1.0000000e-05
  -1.0000000e-05
  -1.0000000e-05
  -1.0000000e-05
  -1.0000000e-05
  -1.0000000e-05
  -1.0000000e-05
  -1.0000000e-05
  -1.0000000e-05
  -1.0000000e-05
  -1.0000000e-05
  -1.0000000e-05
  -1.0000000e-05
  -1.0000000e-05
  -1.0000000e-05
  -1.0000000e-05
  -1.0000000e-05
  -1.0000000e-05
  -1.0000000e-05
  -1.0000000e-05
  -1.0000000e-05
  -1.0000000e-05
  -1.0000000e-05
  -1.0000000e-05
  -1.0000000e-05
  -1.0000000e-05
  -1.0000000e-05
  -1.0000000e-05
  -1.0000000e-05
  -1.0000000e-05
  -1.0000000e-05
  -1.0000000e-05
  -1.0000000e-05
  -1.0000000e-05
  -1.0000000e-05
  -1.0000000e-05
  -1.0000000e-05
  -1.0000000e-05
  -1.0000000e-05
  -1.0000000e-05
  -1.0000000e-05
  -1.0000000e-05
  -1.0000000e-05
  -1.0000000e-05
  -1.0000000e-05
  -1.0000000e-05
  -1.0000000e-05
  -1.0000000e-05
  -1.0000000e-05
  -1.0000000e-05
  -1.0000000e-05
  -1.0000000e-05
  -1.0000000e-05
  -1.0000000e-05
  -1.0000000e-05
  -1.0000000e-05
  -1.0000000e-05
  -1.0000000e-05
  -1.0000000e-05
  -1.0000000e-05
  -1.0000000e-05
  -1.0000000e-05
  -1.0000000e-05
  -1.0000000e-05
  -1.0000000e-05
  -1.0000000e-05
  -1.0000000e-05
  -1.0000000e-05
  -1.0000000e-05
  -1.0000000e-05
  -1.0000000e-05
  -1.0000000e-05
  -1.0000000e-05
  -1.0000000e-05
  -1.0000000e-05
  -1.0000000e-05
  -1.0000000e-05
  -1.0000000e-05
  -1.0000000e-05
  -1.0000000e-05
  -1.0000000e-05
  -1.0000000e-05
  -1.0000000e-05
  -1.0000000e-05
  -1.0000000e-05
  -1.0000000e-05
  -1.0000000e-05
  -1.0000000e-05
  -1.0000000e-05
  -1.0000000e-05
  -1.0000000e-05
  -1.0000000e-05
  -1.0000000e-05
  -1.0000000e-05
  -1.0000000e-05
  -1.0000000e-05
  -1.0000000e-05
  -1.0000000e-05
  -1.0000000e-05
  -1.0000000e-05
  -1.0000000e-05
  -1.0000000e-05
  -1.0000000e-05
  -1.0000000e-05
  -1.0000000e-05
  -1.0000000e-05
  -1.0000000e-05
  -1.0000000e-05
  -1.0000000e-05
  -1.0000000e-05
  -1.0000000e-05
  -1.0000000e-05
  -1.0000000e-05
  -1.0000000e-05
  -1.0000000e-05
  -1.0000000e-05
  -1.0000000e-05
  -1.0000000e-05
  -1.0000000e-05
  -1.0000000e-05
  -1.0000000e-05
  -1.0000000e-05
  -1.0000000e-05
  -1.0000000e-05
  -1.0000000e-05
  -1.0000000e-05
  -1.0000000e-05
  -1.0000000e-05
  -1.0000000e-05
  -1.0000000e-05
  -1.0000000e-05
  -1.0000000e-05
  -1.0000000e-05
  -1.0000000e-05
  -1.0000000e-05
  -1.0000000e-05
  -1.0000000e-05
  -1.0000000e-05
  -1.0000000e-05
  -1.0000000e-05
  -1.0000000e-05
  -1.0000000e-05
  -1.0000000e-05
  -1.0000000e-05
  -1.0000000e-05
  -1.0000000e-05
  -1.0000000e-05
  -1.0000000e-05
  -1.0000000e-05
  -1.0000000e-05
  -1.0000000e-05
  -1.0000000e-05
  -1.0000000e-05
  -1.0000000e-05
  -1.0000000e-05
  -1.0000000e-05
  -1.0000000e-05
  -1.0000000e-05
  -1.0000000e-05
  -1.0000000e-05
  -1.0000000e-05
  -1.0000000e-05
  -1.0000000e-05
  -1.0000000e-05
  -1.0000000e-05
  -1.0000000e-05
  -1.0000000e-05
  -1.0000000e-05
  -1.0000000e-05
  -1.0000000e-05
  -1.0000000e-05
  -1.0000000e-05
  -1.0000000e-05
  -1.0000000e-05
  -1.0000000e-05
  -1.0000000e-05
  -1.0000000e-05
  -1.0000000e-05
  -1.0000000e-05
  -1.0000000e-05
  -1.0000000e-05
  -1.0000000e-05
  -1.0000000e-05
  -1.0000000e-05
  -1.0000000e-05
  -1.0000000e-05
  -1.0000000e-05
  -1.0000000e-05
  -1.0000000e-05
  -1.0000000e-05
  -1.0000000e-05
  -1.0000000e-05
  -1.0000000e-05
  -1.0000000e-05
  -1.0000000e-05
  -1.0000000e-05
  -1.0000000e-05
  -1.0000000e-05
  -1.0000000e-05
  -1.0000000e-05
  -1.0000000e-05
  -1.0000000e-05
  -1.0000000e-05
  -1.0000000e-05
  -1.0000000e-05
  -1.0000000e-05
  -1.0000000e-05
  -1.0000000e-05
  -1.0000000e-05
  -1.0000000e-05
  -1.0000000e-05
  -1.0000000e-05
  -1.0000000e-05
  -1.0000000e-05
  -1.0000000e-05
  -1.0000000e-05
  -1.0000000e-05
  -1.0000000e-05
  -1.0000000e-05
  -1.0000000e-05
  -1.0000000e-05
  -1.0000000e-05
  -1.0000000e-05
  -1.0000000e-05
  -1.0000000e-05
  -1.0000000e-05
  -1.0000000e-05
  -1.0000000e-05
  -1.0000000e-05
  -1.0000000e-05
  -1.0000000e-05
  -1.0000000e-05
  -1.0000000e-05
  -1.0000000e-05
  -1.0000000e-05
  -1.0000000e-05
  -1.0000000e-05
  -1.0000000e-05
  -1.0000000e-05
  -1.0000000e-05
  -1.0000000e-05
  -1.0000000e-05
  -1.0000000e-05
  -1.0000000e-05
  -1.0000000e-05
  -1.0000000e-05
  -1.0000000e-05
  -1.0000000e-05
  -1.0000000e-05
  -1.0000000e-05
  -1.0000000e-05
  -1.0000000e-05
  -1.0000000e-05
  -1.0000000e-05
  -1.0000000e-05
  -1.0000000e-05
  -1.0000000e-05
  -1.0000000e-05
  -1.0000000e-05
  -1.0000000e-05
  -1.0000000e-05
  -1.0000000e-05
  -1.0000000e-05
  -1.0000000e-05
  -1.0000000e-05
  -1.0000000e-05
  -1.0000000e-05
  -1.0000000e-05
  -1.0000000e-05
  -1.0000000e-05
  -1.0000000e-05
  -1.0000000e-05
  -1.0000000e-05
  -1.0000000e-05
  -1.0000000e-05
  -1.0000000e-05
  -1.0000000e-05
  -1.0000000e-05
  -1.0000000e-05
  -1.0000000e-05
  -1.0000000e-05
  -1.0000000e-05
  -1.0000000e-05
  -1.0000000e-05
  -1.0000000e-05
  -1.0000000e-05
  -1.0000000e-05
  -1.0000000e-05
  -1.0000000e-05
  -1.0000000e-05
  -1.0000000e-05
  -1.0000000e-05
  -1.0000000e-05
  -1.0000000e-05
  -1.0000000e-05
  -1.0000000e-05
  -1.0000000e-05
  -1.0000000e-05
  -1.0000000e-05
  -1.0000000e-05
  -1.0000000e-05
  -1.0000000e-05
  -1.0000000e-05
  -1.0000000e-05
  -1.0000000e-05
  -1.0000000e-05
  -1.0000000e-05
  -1.0000000e-05
  -1.0000000e-05
  -1.0000000e-05
  -1.0000000e-05
  -1.0000000e-05
  -1.0000000e-05
  -1.0000000e-05
  -1.0000000e-05
  -1.0000000e-05
  -1.0000000e-05
  -1.0000000e-05
  -1.0000000e-05
  -1.0000000e-05
  -1.0000000e-05
  -1.0000000e-05
  -1.0000000e-05
  -1.0000000e-05
  -1.0000000e-05
  -1.0000000e-05
  -1.0000000e-05
  -1.0000000e-05
  -1.0000000e-05
  -1.0000000e-05
  -1.0000000e-05
  -1.0000000e-05
  -1.0000000e-05
  -1.0000000e-05
  -1.0000000e-05
  -1.0000000e-05
  -1.0000000e-05
  -1.0000000e-05
  -1.0000000e-05
  -1.0000000e-05
  -1.0000000e-05
  -1.0000000e-05
  -1.0000000e-05
  -1.0000000e-05
  -1.0000000e-05
  -1.0000000e-05
  -1.0000000e-05
  -1.0000000e-05
  -1.0000000e-05
  -1.0000000e-05
  -1.0000000e-05
  -1.0000000e-05
  -1.0000000e-05
  -1.0000000e-05
  -1.0000000e-05
  -1.0000000e-05
  -1.0000000e-05
  -1.0000000e-05
  -1.0000000e-05
  -1.0000000e-05
  -1.0000000e-05
  -1.0000000e-05
  -1.0000000e-05
  -1.0000000e-05
  -1.0000000e-05
  -1.0000000e-05
  -1.0000000e-05
  -1.0000000e-05
  -1.0000000e-05
  -1.0000000e-05
  -1.0000000e-05
  -1.0000000e-05
  -1.0000000e-05
  -1.0000000e-05
  -1.0000000e-05
  -1.0000000e-05
  -1.0000000e-05
  -1.0000000e-05
  -1.0000000e-05
  -1.0000000e-05
  -1.0000000e-05
  -1.0000000e-05
  -1.0000000e-05
  -1.0000000e-05
  -1.0000000e-05
  -1.0000000e-05
  -1.0000000e-05
  -1.0000000e-05
  -1.0000000e-05
  -1.0000000e-05
  -1.0000000e-05
  -1.0000000e-05
  -1.0000000e-05
  -1.0000000e-05
  -1.0000000e-05
  -1.0000000e-05
  -1.0000000e-05
  -1.0000000e-05
  -1.0000000e-05
  -1.0000000e-05
  -1.0000000e-05
  -1.0000000e-05
  -1.0000000e-05
  -1.0000000e-05
  -1.0000000e-05
  -1.0000000e-05
  -1.0000000e-05
  -1.0000000e-05
  -1.0000000e-05
  -1.0000000e-05
  -1.0000000e-05
  -1.0000000e-05
  -1.0000000e-05
  -1.0000000e-05
  -1.0000000e-05
  -1.0000000e-05
  -1.0000000e-05
  -1.0000000e-05
  -1.0000000e-05
  -1.0000000e-05
  -1.0000000e-05
  -1.0000000e-05
  -1.0000000e-05
  -1.0000000e-05
  -1.0000000e-05
  -1.0000000e-05
  -1.0000000e-05
  -1.0000000e-05
  -1.0000000e-05
  -1.0000000e-05
  -1.0000000e-05
  -1.0000000e-05
  -1.0000000e-05
  -1.0000000e-05
  -1.0000000e-05
  -1.0000000e-05
  -1.0000000e-05
  -1.0000000e-05
  -1.0000000e-05
  -1.0000000e-05
  -1.0000000e-05
  -1.0000000e-05
  -1.0000000e-05
  -1.0000000e-05
  -1.0000000e-05
  -1.0000000e-05
  -1.0000000e-05
  -1.0000000e-05
  -1.0000000e-05
  -1.0000000e-05
  -1.0000000e-05
  -1.0000000e-05
  -1.0000000e-05
  -1.0000000e-05
  -1.0000000e-05
  -1.0000000e-05
  -1.0000000e-05
  -1.0000000e-05
  -1.0000000e-05
  -1.0000000e-05
  -1.0000000e-05
  -1.0000000e-05
  -1.0000000e-05
  -1.0000000e-05
  -1.0000000e-05
  -1.0000000e-05
  -1.0000000e-05
  -1.0000000e-05
  -1.0000000e-05
  -1.0000000e-05
  -1.0000000e-05
  -1.0000000e-05
  -1.0000000e-05
  -1.0000000e-05
  -1.0000000e-05
  -1.0000000e-05
  -1.0000000e-05
  -1.0000000e-05
  -1.0000000e-05
  -1.0000000e-05
  -1.0000000e-05
  -1.0000000e-05
  -1.0000000e-05
  -1.0000000e-05
  -1.0000000e-05
  -1.0000000e-05
  -1.0000000e-05
