# Supplementary material for: A Novel Classification Method for Flutter Signals Based on the CNN and STFT
Source: Hindawi journal article supplement (doi:10.1155/2019/9375437), 2019-04-09
Supplement: f1 [file 9375437.f1.zip › 00_25_z18.0_19channel.txt]

   3.5700000e-02
  -1.3991000e-01
  -5.1240000e-02
   1.4754000e-01
   4.2910000e-02
  -1.8027000e-01
   1.7358000e-01
   1.1439000e-01
  -1.8115000e-01
  -2.8570000e-02
   1.5055000e-01
   6.7780000e-02
  -9.7390000e-02
  -3.4710000e-02
   1.7402000e-01
  -9.9310000e-02
  -2.1960000e-02
   9.0670000e-02
  -1.2264000e-01
  -1.9250000e-02
  -5.2450000e-02
   1.9450000e-01
  -7.6440000e-02
   3.9400000e-02
  -5.2450000e-02
  -6.5530000e-02
   5.7520000e-02
  -1.2039000e-01
   1.5061000e-01
  -8.9700000e-03
  -1.7718000e-01
   1.4430000e-01
  -1.8040000e-02
  -1.8730000e-02
  -2.3250000e-02
   8.5820000e-02
  -3.5950000e-02
  -6.7200000e-03
  -1.0175000e-01
  -2.1400000e-03
   1.0450000e-02
  -1.9884000e-01
   1.7539000e-01
  -9.0430000e-02
   5.0860000e-02
  -9.3500000e-03
  -1.0328000e-01
   4.1950000e-02
   3.1450000e-02
   1.1746000e-01
  -1.0191000e-01
  -2.3720000e-02
   1.1376000e-01
   2.6600000e-03
  -3.0200000e-03
   2.5140000e-02
   3.5530000e-02
   1.3802000e-01
  -1.3391000e-01
   2.8790000e-02
   1.8441000e-01
  -1.0904000e-01
  -5.7470000e-02
   1.0663000e-01
  -3.5070000e-02
   1.1444000e-01
  -2.6415000e-01
  -5.2100000e-03
   1.4773000e-01
  -1.1480000e-01
  -1.2769000e-01
  -4.1400000e-03
   1.5839000e-01
  -1.8332000e-01
   5.1800000e-03
   1.7790000e-02
  -1.0126000e-01
   8.5220000e-02
  -3.8710000e-02
   1.4340000e-02
   2.7970000e-02
  -1.1760000e-02
  -9.7200000e-02
   7.3620000e-02
   3.4050000e-02
  -2.5500000e-02
   5.6430000e-02
   5.2400000e-02
   6.0020000e-02
  -2.4680000e-02
  -4.0550000e-02
  -1.0750000e-02
   1.6226000e-01
  -2.1200000e-01
  -6.1690000e-02
   1.3723000e-01
  -2.6680000e-02
  -3.2630000e-02
  -1.2837000e-01
   7.8500000e-02
   1.6467000e-01
  -5.7140000e-02
  -1.3150000e-01
   6.1310000e-02
   1.0032000e-01
  -7.2410000e-02
  -2.4920000e-02
  -8.6530000e-02
   1.1403000e-01
  -2.9940000e-02
  -7.8090000e-02
  -4.5500000e-03
   7.2300000e-02
   1.1870000e-02
  -1.9031000e-01
   1.2256000e-01
   2.1800000e-02
  -1.5310000e-01
   1.5129000e-01
  -5.5820000e-02
   4.3900000e-02
  -2.7340000e-02
  -6.0160000e-02
   1.3967000e-01
   2.8500000e-03
  -9.9390000e-02
   5.3790000e-02
  -1.9770000e-02
  -6.7010000e-02
   1.0537000e-01
  -8.2830000e-02
   1.0849000e-01
  -7.3920000e-02
  -1.0359000e-01
   1.2272000e-01
  -1.9170000e-02
  -2.5360000e-02
  -5.1770000e-02
  -7.3890000e-02
   1.5875000e-01
  -1.2980000e-01
  -8.4580000e-02
   1.8392000e-01
  -1.5458000e-01
  -1.1160000e-02
  -3.8800000e-02
   9.9990000e-02
  -8.1320000e-02
  -2.5660000e-02
   9.0860000e-02
  -2.7970000e-02
   4.4700000e-03
   1.0710000e-01
  -8.4010000e-02
  -1.0652000e-01
   8.4120000e-02
   1.2600000e-03
  -5.1740000e-02
  -8.3240000e-02
   1.5966000e-01
  -1.3330000e-02
  -1.7930000e-02
  -9.7900000e-03
   6.4380000e-02
  -3.7180000e-02
   8.6600000e-03
   3.9240000e-02
  -6.7610000e-02
  -7.5700000e-03
   2.2150000e-02
  -6.8440000e-02
  -1.7470000e-02
  -3.3830000e-02
   1.5294000e-01
  -8.1790000e-02
  -1.4932000e-01
   1.9017000e-01
  -4.3300000e-03
   2.3900000e-03
  -4.8040000e-02
  -2.1720000e-02
   9.4780000e-02
  -8.4720000e-02
   2.1990000e-02
  -8.4500000e-02
   6.2380000e-02
   6.7150000e-02
  -2.0613000e-01
   1.1066000e-01
   5.9500000e-03
  -9.8510000e-02
   8.9440000e-02
  -3.2080000e-02
   5.6500000e-03
  -8.0690000e-02
   4.5790000e-02
   1.2884000e-01
  -1.8784000e-01
   2.6510000e-02
  -1.0254000e-01
   9.2700000e-02
  -1.3558000e-01
   3.6820000e-02
  -1.2280000e-02
  -2.5720000e-02
   1.6404000e-01
  -2.4235000e-01
   1.1776000e-01
   1.2398000e-01
  -2.3708000e-01
  -2.9120000e-02
   1.0945000e-01
  -7.4820000e-02
  -1.0696000e-01
  -1.0610000e-02
   2.1220000e-02
   5.7910000e-02
  -5.9330000e-02
   8.0660000e-02
   2.8430000e-02
  -8.0060000e-02
   1.3972000e-01
  -3.6630000e-02
  -1.2448000e-01
   4.8750000e-02
  -1.1192000e-01
   1.4180000e-02
   4.8260000e-02
   4.8530000e-02
  -4.4280000e-02
   1.3627000e-01
  -2.5030000e-02
  -1.2138000e-01
   2.2546000e-01
  -1.6536000e-01
   1.1730000e-02
   4.8480000e-02
  -3.9070000e-02
   6.8870000e-02
  -1.0140000e-02
  -6.1940000e-02
  -9.1770000e-02
  -6.5800000e-03
  -6.4930000e-02
  -5.3900000e-02
   9.0290000e-02
  -1.4545000e-01
   4.2800000e-02
   4.5900000e-02
   1.4700000e-02
   6.7170000e-02
  -9.4400000e-02
   1.1143000e-01
  -1.0073000e-01
   1.1910000e-01
  -5.7250000e-02
  -5.3520000e-02
  -1.0580000e-02
   9.2890000e-02
  -1.0945000e-01
  -3.4250000e-02
   1.3336000e-01
   2.3470000e-02
  -8.9660000e-02
  -7.0500000e-03
   9.2040000e-02
  -3.4960000e-02
   2.1610000e-02
  -1.2193000e-01
   1.4811000e-01
  -5.4780000e-02
  -1.2618000e-01
   9.3190000e-02
   4.3570000e-02
  -1.7262000e-01
   2.3910000e-02
  -1.2600000e-03
  -6.8500000e-03
  -7.8740000e-02
   1.9440000e-02
   1.8491000e-01
  -1.6999000e-01
   6.4320000e-02
  -2.7770000e-02
  -5.3270000e-02
   1.1003000e-01
  -1.3144000e-01
   4.1150000e-02
   4.9080000e-02
   1.1600000e-02
   8.8560000e-02
  -2.9750000e-02
   1.3520000e-02
   2.0890000e-02
  -1.0161000e-01
  -2.2260000e-02
   7.5130000e-02
  -6.7500000e-02
  -1.2094000e-01
  -1.3630000e-02
   9.3440000e-02
  -1.1960000e-01
  -7.4250000e-02
   1.8828000e-01
  -4.0140000e-02
  -3.8170000e-02
  -6.2790000e-02
   1.8343000e-01
  -1.4040000e-02
  -1.4682000e-01
  -9.3800000e-03
   8.3900000e-02
   3.0110000e-02
  -1.2651000e-01
  -5.9200000e-02
   1.4866000e-01
   4.5130000e-02
  -2.2200000e-03
   3.8580000e-02
  -1.2310000e-02
   1.5231000e-01
  -2.4756000e-01
   1.5297000e-01
   9.4130000e-02
  -9.2510000e-02
   7.7070000e-02
  -7.4300000e-02
   7.2250000e-02
  -9.5250000e-02
  -5.1980000e-02
   2.7770000e-02
  -5.5710000e-02
  -6.2290000e-02
   1.0657000e-01
  -2.7010000e-02
  -2.7010000e-02
  -4.3350000e-02
  -6.2500000e-03
   3.8190000e-02
  -1.5009000e-01
   6.5970000e-02
   3.9670000e-02
  -2.7700000e-03
  -1.0243000e-01
   8.8120000e-02
  -1.6780000e-02
  -7.1810000e-02
   8.5380000e-02
  -1.5820000e-02
   7.0300000e-02
  -6.0900000e-02
   1.0537000e-01
  -7.6990000e-02
  -1.1055000e-01
   1.5066000e-01
  -4.5400000e-02
  -1.4534000e-01
   4.9410000e-02
  -1.9140000e-02
  -4.9490000e-02
   5.2230000e-02
  -1.6290000e-02
  -1.0390000e-02
   1.2807000e-01
  -1.2996000e-01
  -6.6080000e-02
   1.8411000e-01
  -8.3870000e-02
   4.0600000e-03
  -2.2150000e-02
   1.5894000e-01
  -2.8263000e-01
   1.6544000e-01
   3.2460000e-02
  -2.5918000e-01
   2.7355000e-01
  -1.6687000e-01
  -3.3720000e-02
   5.5910000e-02
  -1.5332000e-01
   1.3344000e-01
  -4.2960000e-02
  -1.7874000e-01
   7.1290000e-02
   1.4534000e-01
   7.6500000e-03
  -3.6520000e-02
   6.5090000e-02
   7.0740000e-02
  -4.2250000e-02
  -2.3600000e-03
   1.3760000e-02
   8.7680000e-02
  -7.1560000e-02
  -4.5900000e-02
  -1.0470000e-02
   3.5370000e-02
   7.9200000e-03
  -1.6067000e-01
   6.4980000e-02
   4.4090000e-02
   1.8810000e-02
   8.8800000e-03
  -1.8840000e-02
  -1.9030000e-02
   4.0250000e-02
   2.0840000e-02
  -1.9508000e-01
   1.2599000e-01
   2.0670000e-02
  -1.0079000e-01
   3.8410000e-02
   2.1170000e-02
   2.6950000e-02
  -1.0762000e-01
  -3.2870000e-02
   1.0520000e-01
  -8.0470000e-02
  -5.2180000e-02
   1.3740000e-02
   9.4150000e-02
   7.5700000e-03
   4.0440000e-02
  -4.6830000e-02
   1.2947000e-01
  -1.0910000e-01
  -9.9720000e-02
   9.4350000e-02
  -3.4600000e-02
  -4.6910000e-02
  -4.9850000e-02
   6.2240000e-02
   6.4600000e-02
  -1.1976000e-01
   2.5060000e-02
   2.2570000e-02
  -5.9090000e-02
  -3.3890000e-02
   5.4150000e-02
  -5.2900000e-03
  -3.9100000e-02
   4.0580000e-02
  -5.8070000e-02
   4.5510000e-02
  -1.4811000e-01
   6.0020000e-02
   1.5680000e-02
  -8.6010000e-02
   1.8260000e-01
  -8.6260000e-02
  -8.0970000e-02
   8.1700000e-03
   7.8530000e-02
  -4.6530000e-02
   4.4000000e-04
   2.7690000e-02
   1.7500000e-03
   1.5362000e-01
   3.3200000e-03
  -7.7950000e-02
   5.4750000e-02
   2.9830000e-02
  -1.5319000e-01
   1.2083000e-01
   1.9550000e-02
  -1.0657000e-01
   5.5550000e-02
   1.6530000e-02
   6.8000000e-03
  -2.4620000e-02
   4.3290000e-02
  -5.4450000e-02
  -6.7910000e-02
   1.5798000e-01
  -1.7814000e-01
   2.7090000e-02
   8.1680000e-02
  -1.3265000e-01
   3.3700000e-03
  -1.1680000e-02
   3.9070000e-02
   2.9300000e-03
  -1.1398000e-01
   9.7880000e-02
   3.6220000e-02
  -1.6300000e-01
   9.4730000e-02
  -4.3650000e-02
  -6.5560000e-02
   1.0849000e-01
  -2.3220000e-02
   6.9780000e-02
  -1.3960000e-02
  -7.6110000e-02
   2.3459000e-01
  -1.3550000e-01
   6.3720000e-02
   5.0700000e-02
  -1.5875000e-01
   9.2260000e-02
  -5.3740000e-02
   6.5120000e-02
  -6.7970000e-02
  -4.5000000e-03
   8.8640000e-02
  -1.9206000e-01
   1.4935000e-01
   7.3500000e-03
  -2.1403000e-01
   1.1192000e-01
   4.3810000e-02
  -1.0238000e-01
   1.6340000e-02
   9.4000000e-03
  -5.0200000e-03
   5.6100000e-02
  -4.9270000e-02
  -6.6790000e-02
   7.7260000e-02
  -9.1000000e-03
  -1.1436000e-01
   4.8120000e-02
  -4.2030000e-02
   1.1623000e-01
  -1.6264000e-01
  -5.2420000e-02
   1.3961000e-01
  -9.5700000e-03
  -3.6410000e-02
  -2.2200000e-03
   1.0737000e-01
   6.6000000e-02
  -3.3150000e-02
   4.5870000e-02
  -5.9800000e-03
   1.6284000e-01
  -9.0260000e-02
  -1.5310000e-01
   1.3270000e-01
   9.4020000e-02
  -2.4221000e-01
  -2.3520000e-02
   1.8546000e-01
  -5.0280000e-02
  -1.6854000e-01
   1.1559000e-01
  -9.9660000e-02
  -8.6640000e-02
   2.5140000e-02
   6.5860000e-02
  -9.6050000e-02
   6.4870000e-02
   3.0630000e-02
  -1.2940000e-02
   4.7240000e-02
  -1.2802000e-01
   1.4559000e-01
  -1.3619000e-01
   1.9060000e-02
   7.2960000e-02
  -6.3030000e-02
   4.1400000e-02
   6.5780000e-02
   1.2560000e-02
  -2.1115000e-01
   1.3375000e-01
  -1.0580000e-02
  -7.2100000e-03
  -3.1530000e-02
  -1.0420000e-02
  -1.1630000e-02
  -3.7400000e-02
  -3.9200000e-03
   2.5390000e-02
  -2.8800000e-03
   8.6900000e-03
   3.3340000e-02
  -1.0589000e-01
  -6.6210000e-02
   1.0350000e-01
   6.1700000e-03
  -1.7945000e-01
   6.4870000e-02
   1.2429000e-01
  -9.3630000e-02
  -4.6530000e-02
   1.4970000e-01
  -1.2522000e-01
  -1.0943000e-01
   1.4230000e-01
  -8.8730000e-02
  -1.9740000e-02
   1.5291000e-01
  -3.0900000e-02
  -3.0980000e-02
   1.2260000e-02
   3.3260000e-02
  -1.3898000e-01
  -1.1642000e-01
   2.5397000e-01
  -1.2462000e-01
  -1.4118000e-01
   2.2414000e-01
  -4.1260000e-02
  -7.5810000e-02
   7.0200000e-03
   1.0529000e-01
  -5.0940000e-02
  -1.9645000e-01
   2.2058000e-01
  -2.3830000e-02
  -1.4702000e-01
   4.4470000e-02
   9.0370000e-02
  -1.5541000e-01
   4.4860000e-02
  -1.4180000e-02
   1.1137000e-01
  -1.6404000e-01
   7.1400000e-02
   7.8740000e-02
  -1.1507000e-01
  -8.2300000e-03
   8.6480000e-02
   3.0350000e-02
  -1.6407000e-01
   1.0136000e-01
  -8.0000000e-04
  -2.1740000e-02
  -7.8580000e-02
  -1.7440000e-02
   3.7300000e-03
   1.7304000e-01
  -2.5633000e-01
   4.0000000e-03
   7.9510000e-02
   8.4200000e-03
  -1.2260000e-02
  -4.2800000e-02
   1.1754000e-01
  -7.2700000e-03
   5.4370000e-02
  -6.5970000e-02
   8.7740000e-02
  -4.0610000e-02
  -6.8820000e-02
  -2.3000000e-02
   1.3221000e-01
  -2.0970000e-02
  -1.4973000e-01
   1.3594000e-01
   7.6500000e-02
  -2.0649000e-01
   6.6300000e-02
   9.4150000e-02
  -1.5308000e-01
  -4.0630000e-02
  -3.3200000e-02
  -4.7270000e-02
  -1.6590000e-02
   2.0040000e-02
   3.2900000e-03
  -1.2651000e-01
   2.9890000e-02
   9.1520000e-02
  -1.3237000e-01
   7.7620000e-02
   3.8910000e-02
  -5.6700000e-02
   2.5200000e-03
  -1.1834000e-01
   1.5776000e-01
  -4.3270000e-02
  -1.6936000e-01
   8.0970000e-02
   1.2388000e-01
  -4.7870000e-02
  -8.5760000e-02
   1.1839000e-01
   1.4300000e-03
  -8.2470000e-02
   3.0900000e-02
   4.3050000e-02
  -2.5640000e-02
   8.3900000e-03
   6.1470000e-02
  -4.8170000e-02
  -2.9300000e-03
   1.0457000e-01
  -1.8655000e-01
   7.2710000e-02
   1.1982000e-01
  -1.9596000e-01
   2.8300000e-02
  -4.2910000e-02
   4.6390000e-02
  -7.6060000e-02
  -3.6110000e-02
   1.1003000e-01
  -5.9690000e-02
  -6.8500000e-03
   4.2610000e-02
   3.2900000e-03
  -5.6800000e-03
  -6.7370000e-02
   4.5290000e-02
   1.7380000e-02
  -8.1160000e-02
  -7.2100000e-03
  -1.2040000e-02
   1.2590000e-01
  -1.7027000e-01
  -8.0000000e-04
   8.0660000e-02
  -1.2851000e-01
  -1.1130000e-02
  -2.3090000e-02
   8.7300000e-02
   4.1980000e-02
  -5.7500000e-02
   2.2890000e-02
   4.8780000e-02
  -1.2656000e-01
  -2.4350000e-02
   3.4000000e-02
  -4.5380000e-02
  -1.4890000e-02
   1.0364000e-01
  -5.1300000e-02
   6.8550000e-02
   4.1510000e-02
   1.9270000e-02
  -7.3950000e-02
  -2.6570000e-02
   1.3169000e-01
  -1.3339000e-01
   8.6400000e-03
  -7.2270000e-02
   4.0900000e-03
  -8.1190000e-02
   7.5100000e-03
   5.7770000e-02
  -5.1220000e-02
  -1.3600000e-02
  -8.1900000e-02
  -5.9200000e-02
   8.2300000e-03
  -1.0337000e-01
   3.3750000e-02
  -8.6640000e-02
  -2.7940000e-02
   7.6660000e-02
  -3.9450000e-02
  -3.8030000e-02
   9.4180000e-02
  -4.9850000e-02
  -1.5520000e-02
   4.6010000e-02
  -5.0860000e-02
   1.8200000e-01
  -7.0190000e-02
   4.6780000e-02
   1.5600000e-02
   5.3330000e-02
   4.4970000e-02
  -9.5990000e-02
  -1.5770000e-02
   6.8300000e-03
   9.1470000e-02
  -1.8214000e-01
   6.7610000e-02
   1.7630000e-02
  -5.2400000e-03
  -1.2300000e-03
  -2.4350000e-02
   5.1220000e-02
  -1.9036000e-01
   7.4000000e-02
  -2.2130000e-02
   4.7320000e-02
  -3.4250000e-02
  -1.9042000e-01
   7.1840000e-02
  -2.1400000e-03
  -1.2473000e-01
   5.8920000e-02
   1.9110000e-02
   3.5260000e-02
   7.4190000e-02
  -1.3745000e-01
   8.4400000e-03
   1.1403000e-01
  -9.4670000e-02
  -4.6280000e-02
   1.0134000e-01
  -6.8500000e-03
   6.1940000e-02
  -8.2970000e-02
   1.4458000e-01
   2.7100000e-03
  -1.1699000e-01
   4.7380000e-02
  -7.0770000e-02
  -2.6620000e-02
  -3.4410000e-02
   4.4550000e-02
   2.0560000e-02
  -6.6130000e-02
   1.1768000e-01
  -7.0440000e-02
  -8.5000000e-02
   1.1524000e-01
  -1.0682000e-01
   4.8750000e-02
  -5.1300000e-02
  -1.1420000e-01
  -5.9220000e-02
   3.1750000e-02
  -8.5110000e-02
  -5.3710000e-02
  -5.2000000e-04
   3.8770000e-02
  -9.8950000e-02
   1.0756000e-01
   1.1809000e-01
  -2.0495000e-01
   1.1708000e-01
   1.2695000e-01
  -1.2571000e-01
  -5.4600000e-03
   9.4570000e-02
   5.8150000e-02
  -1.3300000e-02
   2.5690000e-02
  -3.8080000e-02
  -2.3880000e-02
  -4.0830000e-02
  -1.0019000e-01
   6.2920000e-02
  -1.0438000e-01
   8.1620000e-02
   3.0270000e-02
  -1.4142000e-01
   8.1570000e-02
  -9.6700000e-02
   1.2061000e-01
  -5.3300000e-02
   3.2820000e-02
   9.2120000e-02
  -5.5380000e-02
   9.3990000e-02
  -1.3975000e-01
   1.6750000e-02
   1.1730000e-02
  -5.0200000e-03
   2.8350000e-02
  -4.8090000e-02
   1.0890000e-01
  -7.8250000e-02
  -5.0890000e-02
   4.0690000e-02
   1.9341000e-01
  -1.3314000e-01
  -2.6300000e-03
   1.9549000e-01
  -6.6630000e-02
  -1.1938000e-01
  -1.0970000e-02
   1.5785000e-01
  -5.5330000e-02
  -1.0564000e-01
  -7.6440000e-02
  -8.0000000e-04
   4.9900000e-03
  -1.6777000e-01
   6.2130000e-02
  -9.8180000e-02
   5.2450000e-02
   1.2910000e-02
  -6.0980000e-02
   1.2700000e-01
  -3.7040000e-02
   6.2800000e-03
  -1.2450000e-02
   2.0936000e-01
  -1.3975000e-01
  -7.5980000e-02
   2.0141000e-01
  -1.1628000e-01
  -6.1530000e-02
  -3.7230000e-02
   8.8040000e-02
  -1.3811000e-01
   4.1130000e-02
   4.9130000e-02
  -1.1979000e-01
   1.6400000e-02
   4.0580000e-02
  -4.1430000e-02
  -4.6940000e-02
  -1.1784000e-01
   1.2355000e-01
   3.5530000e-02
  -1.5247000e-01
   3.0430000e-02
   2.1400000e-01
  -2.1638000e-01
  -6.3230000e-02
   7.8880000e-02
   5.3550000e-02
  -8.2280000e-02
  -1.0008000e-01
   1.1091000e-01
   1.1886000e-01
  -8.5500000e-03
  -1.6667000e-01
   8.6090000e-02
   4.5500000e-03
  -6.3280000e-02
  -7.7900000e-03
  -5.1030000e-02
   1.3981000e-01
   7.4600000e-03
  -5.1440000e-02
  -3.0680000e-02
   5.0370000e-02
  -7.7590000e-02
  -7.2520000e-02
   1.3558000e-01
  -7.6630000e-02
   1.5850000e-02
   4.7200000e-03
   3.2960000e-02
   7.6690000e-02
  -9.6210000e-02
   1.9190000e-02
   5.2750000e-02
   4.8580000e-02
  -8.2830000e-02
  -9.7330000e-02
  -4.6100000e-03
  -3.4630000e-02
  -7.4300000e-03
  -7.8720000e-02
   1.3059000e-01
  -3.3200000e-03
  -1.0729000e-01
   9.2430000e-02
   1.3630000e-02
  -1.6530000e-02
   2.9940000e-02
  -1.1240000e-02
  -1.4480000e-02
   5.4890000e-02
  -2.3140000e-02
   2.0400000e-02
   7.9510000e-02
  -1.2632000e-01
   1.2360000e-01
  -1.3536000e-01
  -1.2910000e-02
   3.0160000e-02
  -1.2039000e-01
   1.5520000e-02
  -1.6510000e-02
  -3.5730000e-02
  -9.7640000e-02
   5.7550000e-02
  -2.2780000e-02
   7.5900000e-03
   5.4860000e-02
  -1.1107000e-01
   9.3030000e-02
   8.1510000e-02
  -1.5864000e-01
   7.3010000e-02
   4.4830000e-02
  -7.8250000e-02
   4.1870000e-02
  -7.2710000e-02
   3.1560000e-02
   3.7210000e-02
  -1.9080000e-02
   5.5470000e-02
   1.6970000e-02
  -1.3632000e-01
   7.9490000e-02
   1.9060000e-02
   2.9230000e-02
  -8.5240000e-02
   7.3180000e-02
   7.0440000e-02
  -1.4595000e-01
   5.2940000e-02
   1.5570000e-02
  -7.8770000e-02
  -5.1000000e-02
   8.3900000e-03
   4.2580000e-02
   1.4530000e-02
  -1.6966000e-01
   1.0471000e-01
   4.6040000e-02
  -7.1180000e-02
   3.5510000e-02
  -7.4410000e-02
   1.8025000e-01
  -1.2100000e-03
  -1.3051000e-01
   1.1661000e-01
  -4.4910000e-02
  -5.2120000e-02
   1.6120000e-02
   3.1500000e-02
   4.6200000e-02
  -4.9110000e-02
   3.9450000e-02
   1.4937000e-01
  -1.0729000e-01
  -4.8720000e-02
   6.5420000e-02
  -2.2200000e-03
  -2.0141000e-01
   2.5530000e-02
   4.9220000e-02
  -2.6570000e-02
  -1.3325000e-01
   1.0877000e-01
   4.3490000e-02
  -4.2720000e-02
  -9.3610000e-02
   5.4430000e-02
   2.7700000e-03
  -1.2993000e-01
   4.2740000e-02
  -1.4530000e-02
  -9.1990000e-02
   1.2906000e-01
  -4.6250000e-02
  -3.3200000e-02
   5.8840000e-02
   2.4180000e-02
   1.3789000e-01
  -3.1046000e-01
   1.7000000e-02
  -1.5410000e-02
  -2.2477000e-01
  -1.3328000e-01
  -7.6800000e-02
  -4.1070000e-02
  -2.4306000e-01
  -6.2490000e-02
   2.2020000e-02
  -2.4476000e-01
  -2.4833000e-01
   2.2130000e-02
  -1.9812000e-01
  -1.7249000e-01
  -1.0427000e-01
  -2.3319000e-01
   8.7500000e-03
  -2.4868000e-01
  -1.4367000e-01
  -3.1120000e-02
  -1.4096000e-01
  -1.0693000e-01
  -4.2610000e-02
  -9.6270000e-02
  -1.7723000e-01
   4.9650000e-02
  -2.7909000e-01
  -1.1661000e-01
   3.8880000e-02
  -1.0126000e-01
  -1.0540000e-01
  -1.1080000e-01
   1.0310000e-02
  -1.4699000e-01
  -8.4400000e-03
  -3.1810000e-02
  -5.8290000e-02
   2.2980000e-02
  -1.1187000e-01
   4.5820000e-02
  -8.5630000e-02
  -1.1732000e-01
  -1.2122000e-01
  -6.1200000e-02
  -1.0487000e-01
  -1.0603000e-01
   5.8510000e-02
  -1.6873000e-01
  -7.8090000e-02
   4.0190000e-02
  -1.6632000e-01
  -6.5390000e-02
   1.3130000e-02
  -3.0240000e-02
  -1.3430000e-02
  -3.2131000e-01
   1.0567000e-01
   8.7440000e-02
  -2.4356000e-01
  -9.9420000e-02
   1.2925000e-01
  -1.3668000e-01
  -1.4200000e-01
   8.2060000e-02
  -1.2840000e-01
   1.8120000e-02
  -1.7220000e-02
  -1.4010000e-02
  -7.6250000e-02
  -2.4290000e-02
   3.8000000e-02
  -1.7169000e-01
   5.9910000e-02
  -2.1400000e-03
  -8.7350000e-02
  -5.6560000e-02
   6.5280000e-02
  -1.9258000e-01
   2.2192000e-01
  -3.6270000e-02
  -2.5164000e-01
   7.9020000e-02
   8.7410000e-02
  -2.2840000e-02
  -1.9132000e-01
  -1.0293000e-01
   1.4093000e-01
  -1.0720000e-02
  -2.2905000e-01
   1.4074000e-01
   1.1350000e-02
  -1.1145000e-01
  -6.8330000e-02
   5.4480000e-02
  -8.8000000e-03
   1.1500000e-03
  -4.3920000e-02
   1.0400000e-03
   3.7260000e-02
  -6.7310000e-02
  -2.0100000e-02
   1.3650000e-02
   1.4937000e-01
  -1.9237000e-01
  -1.5410000e-02
   2.8997000e-01
  -2.1929000e-01
  -1.1006000e-01
   3.0600000e-02
   1.1022000e-01
  -7.0440000e-02
  -1.6360000e-01
   2.0372000e-01
  -8.9330000e-02
  -1.4485000e-01
   4.7490000e-02
   1.0095000e-01
  -2.1060000e-02
  -1.2368000e-01
   1.1320000e-02
   1.4400000e-01
  -1.2708000e-01
  -1.9850000e-02
   5.6870000e-02
   6.4380000e-02
   1.1800000e-03
  -7.4880000e-02
   8.1430000e-02
  -4.2500000e-02
  -2.7200000e-02
   4.3810000e-02
  -6.8680000e-02
  -2.1100000e-03
   9.6050000e-02
  -5.1980000e-02
   2.5500000e-03
  -4.5570000e-02
  -4.5490000e-02
  -9.0510000e-02
   1.4669000e-01
  -1.0339000e-01
  -5.1220000e-02
   1.9242000e-01
  -8.4150000e-02
  -5.2860000e-02
   1.2174000e-01
  -1.6400000e-02
  -6.1610000e-02
  -4.4530000e-02
  -8.6010000e-02
   1.3421000e-01
   2.5770000e-02
  -1.0915000e-01
   3.8220000e-02
   1.3700000e-03
   8.9580000e-02
  -2.7390000e-02
   7.1300000e-03
  -5.3200000e-03
  -1.8864000e-01
   6.4130000e-02
   2.6270000e-02
   3.6410000e-02
   1.5100000e-03
   1.2919000e-01
   4.1730000e-02
  -1.7855000e-01
   8.5540000e-02
   1.0890000e-01
  -2.1079000e-01
  -2.9260000e-02
   1.4010000e-02
   4.3130000e-02
  -5.4290000e-02
   5.7900000e-03
   5.3960000e-02
   2.1550000e-02
   8.3600000e-03
  -4.6470000e-02
   5.5960000e-02
  -4.8970000e-02
   1.0959000e-01
  -3.0240000e-02
   5.7520000e-02
   2.2890000e-02
  -2.7120000e-02
   4.1840000e-02
  -6.0210000e-02
  -3.5780000e-02
   4.4400000e-03
   9.0120000e-02
  -5.1380000e-02
   8.8730000e-02
  -1.1160000e-02
   6.8710000e-02
  -6.1500000e-02
   8.5430000e-02
   2.1770000e-02
  -6.5640000e-02
   1.1003000e-01
  -1.2941000e-01
   1.0990000e-02
   9.1990000e-02
  -5.8180000e-02
  -7.8700000e-03
   1.5190000e-01
  -1.1299000e-01
   4.0740000e-02
  -2.0340000e-02
   4.5570000e-02
   2.5550000e-02
  -4.4860000e-02
   6.4980000e-02
  -1.3160000e-02
  -1.0910000e-02
   3.7150000e-02
   5.9520000e-02
  -3.1450000e-02
   5.6870000e-02
   1.4700000e-02
  -9.4620000e-02
  -4.3600000e-03
   2.0640000e-01
  -1.4000000e-04
  -2.0260000e-02
  -3.1940000e-02
   4.2880000e-02
   1.8890000e-02
  -1.1063000e-01
   5.1440000e-02
  -3.2550000e-02
   1.1113000e-01
   5.8260000e-02
  -1.3769000e-01
   1.5760000e-01
   4.8310000e-02
  -1.5743000e-01
   3.4270000e-02
   1.3528000e-01
  -6.9480000e-02
  -8.7240000e-02
   5.8890000e-02
   1.0956000e-01
  -1.4595000e-01
  -6.9920000e-02
   2.2746000e-01
  -5.4260000e-02
  -1.5557000e-01
   1.4592000e-01
   3.7800000e-03
   4.6300000e-03
   7.0220000e-02
   3.1940000e-02
   4.5130000e-02
   1.9690000e-02
   1.0874000e-01
  -1.2292000e-01
   1.8970000e-02
   1.4082000e-01
  -3.5450000e-02
  -2.9560000e-02
   5.9550000e-02
  -9.4300000e-03
  -1.2640000e-02
   5.4480000e-02
   6.9860000e-02
  -6.2920000e-02
   3.6700000e-03
   1.0169000e-01
   1.1680000e-02
  -8.4060000e-02
   8.7410000e-02
   3.7210000e-02
  -1.4902000e-01
   1.4784000e-01
   1.6615000e-01
  -2.1457000e-01
   4.2220000e-02
   8.9300000e-02
  -7.3340000e-02
   6.7010000e-02
  -1.7273000e-01
   1.2719000e-01
  -7.9800000e-03
  -6.5470000e-02
   2.0838000e-01
   1.1058000e-01
  -4.6170000e-02
  -9.7880000e-02
   1.8524000e-01
  -1.0670000e-02
  -2.1960000e-02
  -3.6190000e-02
   9.2760000e-02
   6.5860000e-02
  -7.7510000e-02
   5.4750000e-02
   4.9820000e-02
   9.1490000e-02
  -7.8330000e-02
  -6.6270000e-02
   1.2749000e-01
   2.7970000e-02
   2.7470000e-02
   7.8960000e-02
   5.3500000e-03
  -1.1782000e-01
  -1.6810000e-02
   9.4320000e-02
   3.6470000e-02
  -1.1669000e-01
   2.8080000e-02
   6.0590000e-02
  -8.2560000e-02
   2.4290000e-02
   7.7100000e-02
   7.4390000e-02
   1.1600000e-02
  -1.0172000e-01
   9.3140000e-02
   8.3130000e-02
  -1.6399000e-01
   4.2770000e-02
   1.8480000e-01
  -7.1890000e-02
  -1.3641000e-01
   1.2804000e-01
   1.1362000e-01
  -1.3372000e-01
  -3.3640000e-02
   8.9490000e-02
   8.9710000e-02
  -1.0444000e-01
   4.4640000e-02
  -2.2290000e-02
   4.5570000e-02
   3.8930000e-02
   3.4550000e-02
   2.6400000e-02
   8.3820000e-02
  -6.1750000e-02
  -7.1000000e-04
   3.2740000e-02
  -2.2370000e-02
   8.5500000e-03
   1.1266000e-01
  -6.9920000e-02
   2.1463000e-01
   8.0060000e-02
  -1.1494000e-01
   5.9800000e-02
   8.4010000e-02
   7.1000000e-04
  -1.8576000e-01
   1.7095000e-01
   1.0630000e-01
  -1.5250000e-01
  -5.4260000e-02
   1.1000000e-04
   4.5950000e-02
   1.1800000e-03
  -1.5409000e-01
   6.7780000e-02
   9.9860000e-02
  -1.4979000e-01
   1.9875000e-01
  -1.1310000e-01
   1.1867000e-01
  -5.6450000e-02
  -2.5940000e-02
   2.1564000e-01
  -1.6964000e-01
   1.7188000e-01
  -1.3400000e-03
  -6.4300000e-02
   1.6851000e-01
  -1.4227000e-01
   3.3090000e-02
   9.5500000e-02
   4.3920000e-02
  -1.4386000e-01
   1.4548000e-01
   1.3400000e-03
  -6.9090000e-02
   9.4210000e-02
   8.8800000e-03
  -9.0040000e-02
   6.8380000e-02
   3.9350000e-02
   3.4410000e-02
   3.7780000e-02
   7.3500000e-03
  -3.2710000e-02
   9.7420000e-02
  -6.8930000e-02
  -4.3900000e-02
   8.6280000e-02
   7.0710000e-02
  -1.1304000e-01
  -7.1780000e-02
   1.1077000e-01
   3.8470000e-02
  -9.7470000e-02
  -5.6590000e-02
   1.7177000e-01
  -1.3213000e-01
   3.8410000e-02
   1.9108000e-01
  -5.3110000e-02
   1.0400000e-03
   4.2800000e-02
  -2.9300000e-03
   3.9290000e-02
  -3.9130000e-02
   1.1384000e-01
   3.8140000e-02
  -1.2034000e-01
   2.1468000e-01
  -5.8730000e-02
  -6.1720000e-02
   7.6660000e-02
  -2.6000000e-03
   5.9850000e-02
  -1.1387000e-01
   7.2580000e-02
   7.4500000e-02
  -9.3630000e-02
   7.8400000e-03
   3.3500000e-03
   8.1980000e-02
   6.2600000e-02
  -5.1050000e-02
  -5.5880000e-02
   1.0882000e-01
   8.8480000e-02
  -9.2210000e-02
   5.1850000e-02
   4.3100000e-02
  -1.4040000e-02
   5.1800000e-03
  -6.2380000e-02
   4.3400000e-02
  -1.8230000e-02
  -7.5780000e-02
  -1.4737000e-01
   9.4670000e-02
   9.8900000e-02
  -1.2821000e-01
   5.3550000e-02
   1.7753000e-01
   5.4450000e-02
  -1.8217000e-01
   1.0276000e-01
   1.3218000e-01
  -1.7230000e-01
  -2.2620000e-02
   7.4580000e-02
   9.5110000e-02
   4.0830000e-02
  -3.1421000e-01
   2.1732000e-01
   8.4090000e-02
  -2.1795000e-01
   1.2335000e-01
   1.2426000e-01
  -9.1330000e-02
  -9.6200000e-03
   1.0043000e-01
   7.3950000e-02
  -1.1655000e-01
   7.5870000e-02
   1.0298000e-01
  -9.7940000e-02
   6.9260000e-02
   6.8050000e-02
  -3.4300000e-03
  -7.9950000e-02
  -1.2370000e-02
   9.0230000e-02
  -1.6544000e-01
   1.3339000e-01
  -3.1670000e-02
  -1.8620000e-02
  -1.3050000e-02
  -1.2519000e-01
   1.1357000e-01
  -1.2462000e-01
   2.0070000e-02
   9.3800000e-02
   7.5700000e-03
   7.4500000e-02
   1.8420000e-02
  -8.5300000e-03
   4.1430000e-02
  -9.2700000e-03
   6.3230000e-02
  -9.1270000e-02
   4.7520000e-02
  -2.0070000e-02
   7.4110000e-02
  -3.2930000e-02
  -9.0040000e-02
   1.1666000e-01
   3.7180000e-02
  -2.1682000e-01
   2.2650000e-02
   1.2261000e-01
  -5.3030000e-02
   8.8040000e-02
   1.4480000e-02
  -8.5000000e-04
   8.6900000e-03
   8.5220000e-02
   1.0433000e-01
  -1.7956000e-01
   8.4170000e-02
   1.4087000e-01
  -1.4386000e-01
   4.8260000e-02
  -7.0570000e-02
  -2.3220000e-02
   5.6840000e-02
  -1.0290000e-01
   6.5200000e-02
   5.3880000e-02
  -5.0700000e-03
   6.7340000e-02
  -1.4310000e-02
   8.6480000e-02
   2.9280000e-02
  -1.3583000e-01
   4.5210000e-02
   8.5520000e-02
  -1.4107000e-01
   8.1980000e-02
  -7.3200000e-03
  -1.3400000e-03
  -1.0427000e-01
   1.1974000e-01
   7.9870000e-02
  -1.0808000e-01
   9.3660000e-02
  -1.3657000e-01
  -1.3430000e-02
   6.2570000e-02
  -6.9860000e-02
   2.8980000e-02
  -6.7390000e-02
  -6.0920000e-02
   1.8047000e-01
   1.4300000e-03
  -1.4970000e-01
   7.2630000e-02
   7.4850000e-02
  -5.3520000e-02
   5.0070000e-02
  -5.7930000e-02
   1.4863000e-01
  -3.2570000e-02
  -6.3690000e-02
   1.9716000e-01
   1.3540000e-02
  -8.8620000e-02
  -5.0700000e-03
   1.6892000e-01
   6.7830000e-02
  -2.2332000e-01
   1.0100000e-03
   4.3000000e-03
  -5.6070000e-02
   9.8200000e-03
  -1.1510000e-01
   5.1980000e-02
  -5.6950000e-02
  -5.6100000e-02
   9.9340000e-02
  -1.0419000e-01
   2.4870000e-02
   1.3783000e-01
  -5.7000000e-03
   1.8370000e-02
  -9.7010000e-02
   1.6552000e-01
   8.2340000e-02
  -1.8093000e-01
   1.0189000e-01
  -3.7340000e-02
  -1.7537000e-01
   1.5609000e-01
  -4.4280000e-02
  -1.2541000e-01
   3.3230000e-02
   9.9300000e-03
   7.7400000e-02
  -3.6630000e-02
   7.1590000e-02
  -2.7360000e-02
  -3.7120000e-02
   9.6130000e-02
  -5.5630000e-02
  -1.5110000e-02
   4.2660000e-02
  -1.4940000e-02
   2.6050000e-02
  -1.3657000e-01
   6.5780000e-02
   9.9200000e-02
  -5.8620000e-02
  -5.7930000e-02
   3.1500000e-03
   2.9750000e-02
  -5.7720000e-02
   9.8900000e-02
  -1.1170000e-01
   1.5300000e-02
   3.2490000e-02
  -2.1740000e-02
   1.6920000e-01
  -1.1520000e-02
  -8.6720000e-02
   1.1614000e-01
   1.3110000e-02
  -1.1483000e-01
   1.0452000e-01
   4.2200000e-03
  -6.5910000e-02
  -5.7960000e-02
  -8.7880000e-02
   9.7690000e-02
  -1.6001000e-01
  -6.0700000e-02
   1.6212000e-01
  -1.1124000e-01
   1.4005000e-01
  -4.3920000e-02
   4.9430000e-02
   5.9200000e-02
   1.3410000e-02
   3.9070000e-02
  -1.0331000e-01
  -8.0580000e-02
   1.0965000e-01
   5.6340000e-02
  -1.9187000e-01
   2.0029000e-01
   2.8980000e-02
  -3.9320000e-02
   1.4890000e-02
   2.8190000e-02
  -2.4950000e-02
  -7.9290000e-02
  -1.6750000e-02
   2.0700000e-02
  -4.4940000e-02
  -3.1810000e-02
   3.6380000e-02
   5.9200000e-02
  -1.1190000e-02
   5.0090000e-02
  -4.8670000e-02
  -2.6210000e-02
  -1.1410000e-02
  -7.3560000e-02
   1.4315000e-01
  -8.5160000e-02
  -2.3390000e-02
   1.3010000e-01
  -1.2001000e-01
   2.1700000e-03
   5.4320000e-02
   1.2580000e-02
  -3.3040000e-02
   6.0870000e-02
   1.1283000e-01
  -1.5083000e-01
   1.3852000e-01
  -4.6010000e-02
  -7.9760000e-02
   1.5938000e-01
  -6.3170000e-02
   4.9410000e-02
  -7.8200000e-02
   2.0700000e-02
   7.1000000e-04
  -1.9490000e-02
   5.4590000e-02
  -1.1411000e-01
   6.6760000e-02
   9.1300000e-03
  -3.2400000e-03
   7.2630000e-02
  -8.9300000e-02
   2.0970000e-02
   7.9590000e-02
  -7.0960000e-02
  -4.5320000e-02
  -7.8100000e-03
  -5.1820000e-02
   8.5500000e-03
   6.4270000e-02
   1.6780000e-02
   7.3860000e-02
  -1.0986000e-01
   7.5130000e-02
   4.9160000e-02
  -1.6426000e-01
   6.0430000e-02
   6.5390000e-02
  -6.6790000e-02
   1.6511000e-01
  -9.1710000e-02
  -1.0997000e-01
   3.7540000e-02
   9.5400000e-03
  -5.3520000e-02
  -1.7140000e-02
  -1.4970000e-02
  -4.6090000e-02
   5.1030000e-02
   2.4650000e-02
  -8.0610000e-02
   2.3140000e-02
   1.6700000e-01
  -1.6528000e-01
   1.1965000e-01
   7.1530000e-02
  -9.6290000e-02
   1.1261000e-01
  -8.3380000e-02
  -5.8900000e-03
   1.2090000e-02
  -2.6290000e-02
   1.4810000e-02
  -1.7740000e-02
   7.1070000e-02
  -1.1176000e-01
   3.6770000e-02
  -4.1400000e-02
   4.8260000e-02
   5.3630000e-02
   4.0520000e-02
  -4.6990000e-02
   7.4360000e-02
   2.9120000e-02
  -5.3630000e-02
   3.1170000e-02
   9.9000000e-03
  -7.3560000e-02
  -3.7040000e-02
  -2.4160000e-02
  -1.2423000e-01
   1.6497000e-01
  -1.0814000e-01
   9.7550000e-02
  -1.5380000e-02
  -2.8270000e-02
   8.0910000e-02
  -8.8290000e-02
  -2.2760000e-02
   5.2120000e-02
   5.5660000e-02
  -7.9870000e-02
   1.0169000e-01
   6.1060000e-02
  -6.6680000e-02
   5.8000000e-04
   4.0580000e-02
  -3.9260000e-02
   2.1080000e-02
  -1.1228000e-01
   8.1540000e-02
   3.8910000e-02
  -1.4954000e-01
   2.5101000e-01
  -9.6430000e-02
  -3.9130000e-02
   4.7080000e-02
  -3.1480000e-02
   9.9010000e-02
  -9.1690000e-02
  -3.1300000e-03
   7.2930000e-02
   5.8400000e-03
   4.0880000e-02
  -1.1666000e-01
  -5.5490000e-02
   5.6180000e-02
  -6.8240000e-02
   7.2700000e-03
   3.2190000e-02
  -1.4397000e-01
   6.5090000e-02
   9.9420000e-02
  -8.5240000e-02
   3.0540000e-02
   5.0700000e-03
  -1.1543000e-01
   5.5700000e-03
   8.5900000e-02
  -1.2727000e-01
   1.0359000e-01
  -1.4800000e-01
   1.3553000e-01
  -1.0700000e-03
   4.3810000e-02
   2.7770000e-02
  -3.3890000e-02
   1.0855000e-01
  -8.2010000e-02
   8.9630000e-02
  -7.1510000e-02
  -7.5100000e-02
   8.0300000e-03
   6.9970000e-02
  -1.1346000e-01
   2.5640000e-02
   5.7930000e-02
   1.7630000e-02
  -9.5770000e-02
   2.6210000e-02
   3.0850000e-02
  -9.8130000e-02
  -3.5670000e-02
  -5.9090000e-02
  -4.4530000e-02
   3.6770000e-02
  -9.2890000e-02
   1.0518000e-01
  -2.6380000e-02
  -1.1329000e-01
   8.3630000e-02
  -3.0320000e-02
   2.2320000e-02
  -1.3885000e-01
   2.1266000e-01
   7.3320000e-02
  -2.1649000e-01
   1.9875000e-01
   1.4161000e-01
  -1.5538000e-01
  -5.7080000e-02
   3.5150000e-02
   1.0529000e-01
   7.4000000e-03
  -1.2385000e-01
   8.4260000e-02
   2.0698000e-01
  -1.2001000e-01
   1.8810000e-02
   4.9020000e-02
  -4.4640000e-02
  -4.4310000e-02
  -2.8380000e-02
  -1.4578000e-01
   5.9660000e-02
   2.1960000e-02
  -6.4430000e-02
   1.0789000e-01
   7.4000000e-03
  -1.4192000e-01
   5.9090000e-02
   2.3660000e-02
  -4.0440000e-02
  -5.7390000e-02
   3.0740000e-02
   3.1910000e-02
  -1.3067000e-01
   9.3060000e-02
  -6.6350000e-02
  -6.9260000e-02
   6.6380000e-02
  -1.5176000e-01
   1.7476000e-01
  -6.3580000e-02
   2.9900000e-03
   1.3243000e-01
  -3.0300000e-02
  -2.3800000e-02
   9.0000000e-04
   1.8167000e-01
  -3.9040000e-02
  -1.1982000e-01
   2.6360000e-01
  -2.1032000e-01
  -8.6940000e-02
   2.6324000e-01
  -2.0043000e-01
  -2.4570000e-02
  -3.6080000e-02
   7.3730000e-02
   3.8580000e-02
  -2.5068000e-01
   1.9187000e-01
  -1.1190000e-02
  -1.2659000e-01
   9.0670000e-02
  -6.7310000e-02
   3.2460000e-02
  -5.1550000e-02
   8.2670000e-02
   1.0455000e-01
   5.0070000e-02
   9.7900000e-03
   4.2200000e-03
  -4.2640000e-02
   4.1760000e-02
   3.2220000e-02
  -2.5830000e-02
  -1.3020000e-02
   5.6120000e-02
  -3.0000000e-04
   1.2260000e-02
   9.2070000e-02
   1.2340000e-02
  -4.2530000e-02
   7.3290000e-02
   2.0730000e-02
  -5.7550000e-02
   9.4840000e-02
  -1.5837000e-01
   7.9290000e-02
   9.4000000e-03
   1.5190000e-02
  -9.2650000e-02
  -1.3536000e-01
   2.1257000e-01
  -1.9127000e-01
  -3.5100000e-03
  -8.8070000e-02
   1.0649000e-01
   1.2275000e-01
  -2.6527000e-01
   2.2497000e-01
  -1.0360000e-02
   2.2020000e-02
  -1.2780000e-02
   9.3140000e-02
   1.6185000e-01
  -2.5990000e-02
   1.7101000e-01
   5.5700000e-03
   1.1041000e-01
   1.2480000e-02
   6.5230000e-02
  -4.7900000e-02
   1.7556000e-01
   8.9630000e-02
  -4.8390000e-02
   2.5721000e-01
  -5.5770000e-02
   1.1664000e-01
   1.1538000e-01
   9.2560000e-02
   8.4310000e-02
  -9.1300000e-02
   1.6396000e-01
   1.1601000e-01
  -1.6366000e-01
   3.9430000e-02
   2.1233000e-01
  -5.1520000e-02
   1.1930000e-02
   9.0500000e-03
   9.4540000e-02
   5.1880000e-02
  -1.3021000e-01
   1.8746000e-01
   1.5787000e-01
  -1.0786000e-01
   1.0526000e-01
   1.3372000e-01
  -2.8800000e-03
   1.0784000e-01
  -4.4770000e-02
   7.7600000e-03
   1.9848000e-01
  -7.4580000e-02
   7.5900000e-03
   7.2140000e-02
   4.8200000e-02
  -1.9880000e-02
   7.2490000e-02
   1.3547000e-01
  -4.6560000e-02
  -1.4720000e-02
   5.3440000e-02
   5.5930000e-02
   1.2150000e-02
  -4.5210000e-02
   9.7940000e-02
   5.7820000e-02
  -5.9990000e-02
   4.8800000e-02
   1.4894000e-01
  -8.8780000e-02
   8.2720000e-02
  -4.7900000e-02
   3.4960000e-02
   5.4260000e-02
  -1.1831000e-01
   9.7170000e-02
   1.8480000e-02
   1.1137000e-01
  -3.3920000e-02
  -9.1300000e-02
   1.0419000e-01
   7.9180000e-02
  -6.6300000e-02
  -1.2999000e-01
   1.9357000e-01
   4.5870000e-02
  -1.5776000e-01
   8.6310000e-02
   1.2939000e-01
  -9.1440000e-02
  -5.2400000e-02
   1.5796000e-01
  -1.6480000e-02
  -3.4110000e-02
  -3.3610000e-02
   1.3706000e-01
   6.5750000e-02
  -5.8730000e-02
  -8.0000000e-04
   1.3514000e-01
  -1.6500000e-01
   3.9810000e-02
   1.6478000e-01
  -8.9380000e-02
   5.2560000e-02
   1.7380000e-02
   6.0600000e-03
  -2.7360000e-02
   1.6832000e-01
  -7.7570000e-02
  -1.4447000e-01
   6.6240000e-02
  -3.8820000e-02
   2.1910000e-02
  -4.7630000e-02
   2.0890000e-02
   5.5930000e-02
   1.3960000e-02
  -3.5510000e-02
   8.2560000e-02
  -1.5661000e-01
  -1.3600000e-02
   1.0167000e-01
   2.7390000e-02
  -1.8203000e-01
   1.0098000e-01
   1.5409000e-01
  -1.8126000e-01
   7.1450000e-02
  -1.9110000e-02
  -2.7470000e-02
  -2.8820000e-02
   8.7960000e-02
   1.9170000e-02
  -6.9590000e-02
   5.2230000e-02
   8.0120000e-02
  -8.0060000e-02
   1.4040000e-02
   3.8910000e-02
  -7.4390000e-02
   1.0372000e-01
  -4.6200000e-02
  -2.0007000e-01
   2.5847000e-01
   3.4110000e-02
  -8.4200000e-02
  -1.4750000e-02
  -6.9860000e-02
   8.0200000e-02
  -1.9215000e-01
   4.7820000e-02
   4.9430000e-02
  -7.9510000e-02
   2.8820000e-02
   4.8580000e-02
  -6.9670000e-02
  -1.2640000e-02
  -4.2550000e-02
   9.1960000e-02
  -2.8380000e-02
  -7.3950000e-02
   1.1389000e-01
  -1.1220000e-01
   9.9910000e-02
  -1.4000000e-04
  -8.7500000e-03
   3.6690000e-02
  -1.5270000e-02
  -4.7840000e-02
  -5.1710000e-02
  -4.8910000e-02
  -2.8760000e-02
   1.0792000e-01
  -5.3490000e-02
   7.8690000e-02
  -4.6120000e-02
   3.2710000e-02
   1.0608000e-01
  -1.1839000e-01
   3.8900000e-03
  -5.4100000e-02
  -8.9000000e-02
  -2.6620000e-02
   6.3880000e-02
  -1.0235000e-01
   1.0296000e-01
  -2.1470000e-02
  -1.8759000e-01
   9.6500000e-03
   4.6990000e-02
  -4.1040000e-02
  -1.6150000e-02
  -1.3887000e-01
   1.1834000e-01
   1.7330000e-02
  -5.7720000e-02
   1.3800000e-01
  -3.1170000e-02
  -6.4540000e-02
   1.1540000e-02
   1.5203000e-01
  -5.1490000e-02
   6.1400000e-03
   1.3270000e-01
  -4.9790000e-02
  -8.4120000e-02
   8.7570000e-02
   1.2023000e-01
  -2.2412000e-01
  -1.2185000e-01
   2.0528000e-01
  -1.3495000e-01
  -1.7383000e-01
   1.2209000e-01
   4.3270000e-02
  -2.2780000e-02
  -1.9897000e-01
   1.2382000e-01
  -3.3000000e-04
  -1.6152000e-01
   3.6490000e-02
   3.9840000e-02
  -2.3300000e-03
  -1.0965000e-01
  -1.8640000e-02
   7.7680000e-02
  -5.4560000e-02
  -1.5460000e-02
   8.7520000e-02
  -3.1420000e-02
  -8.5960000e-02
   1.1949000e-01
  -4.6340000e-02
   1.9820000e-02
   3.2900000e-03
   1.4750000e-02
  -4.6280000e-02
   3.8110000e-02
   5.6590000e-02
  -1.6179000e-01
  -6.6410000e-02
   6.2320000e-02
   5.1660000e-02
  -3.7230000e-02
   1.0896000e-01
  -5.4810000e-02
  -1.7427000e-01
   1.1592000e-01
  -1.0304000e-01
  -9.4430000e-02
   2.2200000e-03
   2.8410000e-02
  -3.8170000e-02
  -1.8929000e-01
   1.8282000e-01
  -6.9100000e-03
  -2.1364000e-01
   1.2215000e-01
  -3.5860000e-02
   3.8850000e-02
  -4.8780000e-02
   2.0620000e-02
   6.8020000e-02
  -1.6659000e-01
   6.2200000e-03
   3.1910000e-02
  -1.6210000e-01
   6.4870000e-02
   3.0380000e-02
   5.6340000e-02
  -4.4090000e-02
   7.1800000e-03
   1.0400000e-01
  -6.8790000e-02
  -1.2972000e-01
   5.7330000e-02
  -3.1830000e-02
   3.8390000e-02
   7.5100000e-03
   1.9520000e-02
   5.2150000e-02
  -1.0389000e-01
   4.4770000e-02
  -4.1040000e-02
  -2.6650000e-02
  -1.9250000e-02
  -1.1222000e-01
  -2.8350000e-02
   4.3380000e-02
  -1.3937000e-01
   2.6730000e-02
   1.1935000e-01
  -1.6725000e-01
  -3.5590000e-02
  -2.2810000e-02
   2.6920000e-02
   6.3230000e-02
  -9.0840000e-02
   1.4641000e-01
   5.1850000e-02
  -6.8220000e-02
  -2.3060000e-02
  -7.9350000e-02
   2.7880000e-02
   7.4630000e-02
  -9.3080000e-02
  -1.3876000e-01
   6.8900000e-02
   1.1184000e-01
  -1.5160000e-02
  -1.2626000e-01
   9.5250000e-02
   3.1060000e-02
  -1.8189000e-01
   3.2850000e-02
   5.9960000e-02
  -4.6470000e-02
  -4.1730000e-02
  -9.0120000e-02
   1.4263000e-01
  -6.1090000e-02
  -1.3679000e-01
   1.3980000e-02
   1.3572000e-01
  -1.8082000e-01
   1.5894000e-01
  -3.5890000e-02
  -2.2020000e-02
   6.0920000e-02
  -1.8940000e-01
   1.4548000e-01
   8.2800000e-03
  -1.6755000e-01
   2.0742000e-01
  -1.4869000e-01
  -1.6230000e-02
   8.7900000e-02
  -1.3498000e-01
   1.5461000e-01
  -3.0820000e-02
  -6.8330000e-02
   8.5000000e-02
  -1.0254000e-01
  -1.1466000e-01
   1.9631000e-01
  -2.0709000e-01
   3.7620000e-02
  -5.2510000e-02
  -1.0550000e-01
   1.6290000e-02
  -1.0490000e-01
   1.0191000e-01
  -2.0670000e-02
  -1.5530000e-01
   2.7910000e-02
   1.0978000e-01
  -5.0260000e-02
  -4.0660000e-02
   8.3540000e-02
  -6.1940000e-02
   5.2970000e-02
   7.1420000e-02
   6.1100000e-03
   5.9800000e-02
  -3.2000000e-02
  -1.9630000e-02
  -8.7850000e-02
   1.1946000e-01
  -6.6130000e-02
  -7.0900000e-02
   1.8150000e-02
  -5.8570000e-02
   9.2150000e-02
  -1.1299000e-01
   5.2600000e-03
   1.0216000e-01
  -1.1954000e-01
  -2.7720000e-02
  -3.1200000e-02
   5.7060000e-02
   7.9320000e-02
  -1.2122000e-01
   3.3420000e-02
   3.7800000e-03
  -1.6196000e-01
   6.1860000e-02
  -5.3330000e-02
   3.0490000e-02
   5.0450000e-02
  -1.0032000e-01
   4.9190000e-02
  -1.2900000e-01
   7.9790000e-02
   7.8910000e-02
  -4.9850000e-02
   7.5450000e-02
   1.3701000e-01
   8.3400000e-03
  -1.9653000e-01
   5.2940000e-02
   2.2320000e-02
  -1.3805000e-01
  -2.0670000e-02
   4.9110000e-02
  -6.3170000e-02
  -1.3443000e-01
   1.4008000e-01
   8.5500000e-03
  -1.1538000e-01
   4.8040000e-02
  -5.8400000e-02
  -1.5623000e-01
   9.0920000e-02
  -1.8620000e-02
  -4.0850000e-02
   3.4740000e-02
  -1.1460000e-02
   3.8410000e-02
  -4.3380000e-02
   1.5130000e-02
  -5.0700000e-02
   2.5000000e-03
   5.2940000e-02
  -3.8900000e-03
   1.6120000e-02
  -6.8980000e-02
   1.7271000e-01
  -8.4310000e-02
   2.4400000e-02
   1.4120000e-02
   5.3990000e-02
  -3.4490000e-02
  -1.3790000e-02
   5.2180000e-02
  -1.1724000e-01
   2.9720000e-02
  -9.4870000e-02
   8.9330000e-02
  -1.3904000e-01
   3.9430000e-02
  -9.9880000e-02
  -1.3103000e-01
   8.0830000e-02
  -5.1660000e-02
   2.5640000e-02
   7.4520000e-02
  -6.7310000e-02
  -9.0590000e-02
   2.1896000e-01
  -1.7550000e-01
  -5.5710000e-02
   1.7657000e-01
  -1.3018000e-01
  -4.8230000e-02
  -4.1620000e-02
  -4.3730000e-02
   3.3120000e-02
  -2.5960000e-02
   2.4790000e-02
  -1.3835000e-01
   5.0530000e-02
   7.6580000e-02
  -1.2133000e-01
   3.8700000e-03
   1.6423000e-01
   7.1000000e-04
   2.8320000e-02
   9.0730000e-02
  -4.7210000e-02
  -7.7510000e-02
   4.8170000e-02
  -4.3920000e-02
  -6.6080000e-02
  -5.7500000e-02
  -5.4070000e-02
   1.3468000e-01
  -4.1920000e-02
  -1.6763000e-01
   1.3380000e-02
   1.2437000e-01
  -8.2690000e-02
  -8.2750000e-02
   1.8000000e-01
  -1.6761000e-01
  -4.9710000e-02
   1.1850000e-01
  -8.5760000e-02
  -8.6700000e-02
  -3.7320000e-02
   1.5834000e-01
  -4.0630000e-02
  -1.6714000e-01
   1.2015000e-01
   6.8550000e-02
  -1.5801000e-01
  -6.6490000e-02
   1.3057000e-01
   1.1266000e-01
  -1.9949000e-01
  -1.4537000e-01
   1.3465000e-01
   1.0304000e-01
  -2.2291000e-01
   1.6640000e-02
   2.1194000e-01
  -7.6990000e-02
  -4.3270000e-02
  -1.5930000e-02
  -1.0422000e-01
  -1.0340000e-02
   1.2185000e-01
  -7.9540000e-02
  -4.6580000e-02
  -7.2900000e-03
  -3.6000000e-04
  -2.0810000e-02
   9.1930000e-02
  -1.8400000e-02
  -5.1710000e-02
   9.8950000e-02
   5.5630000e-02
  -1.0498000e-01
  -1.1006000e-01
   1.3320000e-01
   8.5160000e-02
  -1.7704000e-01
  -6.1530000e-02
   5.4890000e-02
   2.0687000e-01
  -2.7122000e-01
   1.0038000e-01
   3.6080000e-02
  -9.2020000e-02
   5.2560000e-02
   2.2540000e-02
   3.6580000e-02
  -1.6385000e-01
   3.4680000e-02
   3.0430000e-02
  -1.6133000e-01
   3.4710000e-02
   1.0040000e-02
   2.3330000e-02
   1.7190000e-02
  -8.2690000e-02
   8.9490000e-02
   3.6380000e-02
   1.0180000e-01
  -8.0470000e-02
  -1.0140000e-02
  -1.9140000e-02
   1.4000000e-03
  -1.1055000e-01
  -6.5500000e-03
  -1.5790000e-02
  -4.1040000e-02
  -6.0600000e-03
  -8.4150000e-02
   3.6900000e-02
   5.6290000e-02
   1.8700000e-02
  -7.0440000e-02
  -2.9040000e-02
  -1.2560000e-02
  -3.7230000e-02
   2.4730000e-02
  -3.2930000e-02
   4.0770000e-02
   1.1500000e-03
  -6.9750000e-02
   1.1359000e-01
  -4.1700000e-02
   4.9900000e-03
  -1.0360000e-02
  -1.2143000e-01
   2.1740000e-02
  -5.2860000e-02
  -5.4180000e-02
   1.1760000e-02
   2.4320000e-02
  -1.2270000e-01
   1.4274000e-01
   1.5100000e-03
   1.8560000e-02
   2.0450000e-02
   7.7600000e-03
   1.0287000e-01
   5.9630000e-02
  -8.1950000e-02
  -1.1058000e-01
   1.0575000e-01
  -7.0250000e-02
  -4.6090000e-02
  -1.1000000e-03
  -6.6000000e-04
   1.0740000e-01
  -3.1000000e-03
  -1.4932000e-01
   1.1225000e-01
   9.4950000e-02
  -1.9047000e-01
   3.6410000e-02
   8.3520000e-02
  -1.0594000e-01
   9.9300000e-03
  -1.8810000e-02
   2.1770000e-02
  -2.6100000e-02
   5.5800000e-02
  -9.9640000e-02
   1.1209000e-01
  -1.5550000e-02
  -1.4682000e-01
   1.7068000e-01
  -6.5040000e-02
   5.3660000e-02
   3.7320000e-02
  -6.7200000e-03
  -5.8180000e-02
  -4.9190000e-02
   5.9390000e-02
  -1.2141000e-01
   3.7400000e-02
   3.2160000e-02
  -6.0100000e-02
   5.6760000e-02
  -1.3750000e-01
   9.2760000e-02
   1.7220000e-02
  -9.8790000e-02
   2.5960000e-02
  -2.2670000e-02
   1.0115000e-01
  -1.1464000e-01
  -3.1420000e-02
   7.5480000e-02
   1.4530000e-02
  -7.7430000e-02
  -1.3882000e-01
   8.9160000e-02
   8.1900000e-02
  -9.4950000e-02
  -1.1156000e-01
   1.7841000e-01
   2.2040000e-02
  -8.0610000e-02
   1.2037000e-01
   6.0600000e-03
  -1.9330000e-02
   7.2000000e-02
   2.8760000e-02
  -3.3780000e-02
   6.3580000e-02
  -1.1623000e-01
  -9.2100000e-03
   7.1860000e-02
  -1.2541000e-01
   4.7200000e-03
  -5.4450000e-02
  -1.6824000e-01
   2.9230000e-02
   6.1200000e-02
  -1.0076000e-01
  -9.6270000e-02
   1.7676000e-01
   7.4000000e-04
  -1.1738000e-01
   1.4455000e-01
  -1.1930000e-02
  -3.1200000e-02
  -1.5440000e-02
  -8.0770000e-02
   8.5080000e-02
   7.9800000e-03
  -3.9650000e-02
   3.4160000e-02
  -1.1980000e-02
   1.7328000e-01
  -1.1228000e-01
   6.5470000e-02
   5.5470000e-02
  -2.2749000e-01
   1.4750000e-02
   5.6340000e-02
  -3.5100000e-03
  -1.6275000e-01
   9.5170000e-02
   6.8410000e-02
  -7.4410000e-02
  -3.3200000e-03
  -3.2300000e-02
  -1.1499000e-01
  -1.6340000e-02
   8.8590000e-02
  -1.2856000e-01
   6.7940000e-02
   1.0869000e-01
  -1.4610000e-02
  -1.2834000e-01
  -5.9800000e-03
   1.2717000e-01
   6.3860000e-02
  -3.3610000e-02
  -2.4350000e-02
   4.1810000e-02
  -3.6660000e-02
   7.7460000e-02
  -6.0680000e-02
  -9.3190000e-02
   1.1129000e-01
  -1.1551000e-01
  -1.1642000e-01
   1.7190000e-02
   1.2500000e-02
  -8.4390000e-02
  -5.2200000e-02
   1.8640000e-02
  -2.3000000e-03
  -1.0356000e-01
  -2.7940000e-02
   1.8452000e-01
  -1.4277000e-01
   8.0310000e-02
   4.6860000e-02
  -7.5810000e-02
  -7.3800000e-03
   1.2230000e-02
   2.7420000e-02
  -4.0360000e-02
  -5.0720000e-02
   9.3190000e-02
   6.8680000e-02
  -6.8240000e-02
   3.4250000e-02
  -1.0140000e-02
  -7.8740000e-02
   1.1661000e-01
  -7.7730000e-02
  -3.0630000e-02
  -1.4970000e-02
  -5.2830000e-02
   1.7613000e-01
  -6.8760000e-02
   8.1200000e-03
   2.5770000e-02
  -5.4370000e-02
  -6.2950000e-02
  -1.4663000e-01
   1.8510000e-01
  -1.8219000e-01
  -4.1180000e-02
   7.2080000e-02
  -6.7810000e-02
   1.9850000e-02
  -1.0825000e-01
   1.1634000e-01
   1.3122000e-01
  -1.4447000e-01
   1.6700000e-02
   6.0900000e-02
  -1.3314000e-01
   4.5540000e-02
   3.4220000e-02
  -1.7930000e-02
  -8.4970000e-02
  -1.7300000e-02
   1.1332000e-01
  -2.9800000e-02
  -9.1440000e-02
   3.9730000e-02
   9.1380000e-02
  -9.5360000e-02
  -4.7600000e-02
   1.7885000e-01
  -1.2176000e-01
  -3.9040000e-02
   2.2780000e-02
  -4.2250000e-02
   1.4526000e-01
  -3.0818000e-01
   1.5228000e-01
   9.8650000e-02
  -2.6384000e-01
   1.9637000e-01
  -1.2873000e-01
  -1.7710000e-02
   8.2230000e-02
  -1.0627000e-01
   1.9692000e-01
  -8.4170000e-02
  -7.8850000e-02
   6.3500000e-02
   8.2780000e-02
  -1.0254000e-01
  -5.0920000e-02
   1.9363000e-01
  -1.4713000e-01
  -8.7820000e-02
   2.0232000e-01
  -1.2516000e-01
  -9.8160000e-02
   1.0340000e-02
  -3.2460000e-02
   5.6040000e-02
  -7.3010000e-02
  -6.5890000e-02
   1.4732000e-01
  -1.5253000e-01
   7.9570000e-02
   3.5530000e-02
  -1.2851000e-01
   1.8993000e-01
  -1.5162000e-01
  -1.7550000e-02
  -2.9610000e-02
   5.4370000e-02
  -7.9430000e-02
   6.5000000e-03
   1.1891000e-01
  -2.3475000e-01
   9.7830000e-02
   6.4570000e-02
  -4.7160000e-02
  -2.7660000e-02
   1.3065000e-01
  -6.7830000e-02
  -1.4940000e-02
   9.7220000e-02
  -4.4690000e-02
  -9.0200000e-03
  -9.9420000e-02
   1.0616000e-01
   7.4550000e-02
  -1.1590000e-01
   1.6120000e-02
   9.5170000e-02
  -3.2660000e-02
  -1.4194000e-01
   3.2000000e-02
   9.5170000e-02
  -1.3695000e-01
   3.3700000e-03
   1.1746000e-01
  -1.0128000e-01
  -5.2600000e-03
   4.1480000e-02
  -3.7290000e-02
  -1.3536000e-01
   1.6522000e-01
  -7.8470000e-02
   4.1180000e-02
   4.0500000e-02
  -6.7340000e-02
   1.0792000e-01
  -1.7740000e-02
   9.0970000e-02
  -1.2141000e-01
   6.9900000e-03
   1.1398000e-01
  -1.0699000e-01
  -5.2810000e-02
  -3.5600000e-03
   9.0010000e-02
  -7.1510000e-02
  -9.6540000e-02
   1.5820000e-02
  -1.1455000e-01
  -6.6540000e-02
   9.8620000e-02
  -6.8960000e-02
   9.0500000e-03
   7.2440000e-02
  -1.2511000e-01
   1.5724000e-01
  -6.1700000e-03
  -1.3553000e-01
  -4.9130000e-02
   1.0874000e-01
  -2.1440000e-02
  -2.7969000e-01
   2.4301000e-01
  -4.6230000e-02
  -8.5000000e-03
   2.9610000e-02
  -8.5350000e-02
   1.7786000e-01
   1.1080000e-02
  -3.8910000e-02
   1.0485000e-01
  -7.7020000e-02
  -6.8380000e-02
   3.5400000e-03
   1.1677000e-01
  -5.6450000e-02
  -1.9242000e-01
   6.7670000e-02
  -4.3700000e-02
   1.2370000e-02
  -8.0030000e-02
  -5.7330000e-02
   1.4230000e-01
  -4.4660000e-02
  -6.6210000e-02
   6.9090000e-02
  -2.4180000e-02
   3.4770000e-02
  -7.2110000e-02
   1.0224000e-01
  -2.9670000e-02
  -2.2283000e-01
   7.1200000e-02
   8.4450000e-02
  -8.2670000e-02
  -8.7490000e-02
   2.0076000e-01
  -5.3990000e-02
  -7.0990000e-02
   6.0480000e-02
   4.9710000e-02
   5.7880000e-02
  -1.4904000e-01
   9.0150000e-02
   1.8348000e-01
  -1.2464000e-01
  -1.6400000e-02
   1.5949000e-01
  -5.8780000e-02
  -3.6770000e-02
   4.6420000e-02
   7.3100000e-02
  -2.1630000e-02
   6.8680000e-02
  -1.8096000e-01
  -3.5200000e-02
   1.8929000e-01
  -1.9508000e-01
  -8.0000000e-04
   8.4400000e-03
  -1.5160000e-02
   2.9340000e-02
  -6.2430000e-02
   6.9940000e-02
  -5.9500000e-03
  -9.9470000e-02
  -6.0210000e-02
   1.1546000e-01
  -8.4690000e-02
  -2.8570000e-02
   1.4500000e-02
  -3.9180000e-02
   8.5790000e-02
   3.0270000e-02
  -1.4140000e-01
   1.8217000e-01
   2.2200000e-03
  -1.7953000e-01
   9.6510000e-02
  -1.7960000e-02
   5.3200000e-03
   8.5300000e-03
   5.8260000e-02
  -8.6940000e-02
  -1.0202000e-01
   1.5346000e-01
  -9.2100000e-02
  -6.0100000e-02
   1.4696000e-01
  -1.0932000e-01
  -5.2120000e-02
  -5.5100000e-03
  -7.6280000e-02
  -6.7060000e-02
   4.4990000e-02
   9.4840000e-02
  -6.7170000e-02
  -1.7548000e-01
   1.3991000e-01
  -7.6280000e-02
  -7.7260000e-02
   1.5291000e-01
  -4.5130000e-02
   1.3160000e-02
   2.9800000e-02
  -2.4700000e-03
   9.0800000e-03
   2.6650000e-02
   1.0250000e-02
   1.2610000e-02
   5.7550000e-02
  -4.0520000e-02
   3.4350000e-02
  -4.5600000e-02
   9.4760000e-02
  -5.7330000e-02
   1.8070000e-02
   2.3830000e-02
  -1.8126000e-01
   6.6680000e-02
  -2.1630000e-02
  -4.9960000e-02
  -2.1880000e-02
   6.3580000e-02
  -3.2930000e-02
  -7.5730000e-02
   1.1263000e-01
  -1.1954000e-01
   1.5977000e-01
  -3.8910000e-02
  -1.2415000e-01
   1.0641000e-01
   1.5351000e-01
  -2.0459000e-01
  -9.0640000e-02
   3.0760000e-02
  -2.5660000e-02
   8.9600000e-02
  -1.9955000e-01
   1.4800000e-01
   2.0670000e-02
  -1.1365000e-01
   3.6140000e-02
   4.8230000e-02
   1.4830000e-02
  -4.0610000e-02
  -3.9650000e-02
   5.2010000e-02
   8.0880000e-02
  -2.0048000e-01
  -3.8900000e-03
   2.0629000e-01
  -7.0080000e-02
  -3.8250000e-02
  -1.3520000e-02
  -4.7730000e-02
  -6.7910000e-02
  -3.3230000e-02
   4.8150000e-02
  -1.8120000e-02
  -1.2706000e-01
   1.5812000e-01
  -3.5230000e-02
  -8.6640000e-02
   1.0394000e-01
   8.7500000e-03
   5.2100000e-03
  -8.2800000e-03
   1.7520000e-02
   9.9910000e-02
  -2.3390000e-02
  -9.0200000e-03
  -9.0730000e-02
   6.6870000e-02
  -3.4160000e-02
  -2.2950000e-02
   7.1120000e-02
  -1.5181000e-01
   7.8330000e-02
   1.0082000e-01
   7.7600000e-03
  -8.6500000e-02
   3.0520000e-02
   9.3060000e-02
  -1.6503000e-01
  -1.1551000e-01
   9.3000000e-04
   1.5892000e-01
  -1.2150000e-02
  -2.3185000e-01
   5.3080000e-02
   2.1573000e-01
  -2.3083000e-01
   2.3170000e-02
   1.1853000e-01
  -1.3000000e-02
   4.5290000e-02
  -1.8107000e-01
   2.0731000e-01
   5.6400000e-02
  -6.5470000e-02
  -1.1984000e-01
   1.4008000e-01
   6.3910000e-02
  -1.2086000e-01
  -6.4980000e-02
   1.4798000e-01
  -2.8900000e-02
  -1.4337000e-01
   4.4250000e-02
  -2.7030000e-02
   1.2940000e-02
  -2.0613000e-01
   1.6975000e-01
   7.4330000e-02
  -1.8589000e-01
   1.1762000e-01
  -3.9800000e-03
  -8.6640000e-02
  -2.3900000e-03
   9.8100000e-02
  -4.9630000e-02
  -1.3760000e-02
   1.3092000e-01
  -3.9800000e-03
  -1.1277000e-01
  -7.2900000e-02
   2.1085000e-01
  -8.6450000e-02
  -1.3893000e-01
   1.8814000e-01
   4.3180000e-02
  -1.0748000e-01
   3.2760000e-02
   1.3561000e-01
   1.9080000e-02
  -8.4890000e-02
   5.9200000e-03
   7.7320000e-02
  -4.4390000e-02
  -1.6517000e-01
  -3.6700000e-03
   1.1200000e-03
   9.6000000e-03
  -1.6964000e-01
   8.3950000e-02
  -3.1040000e-02
  -7.5620000e-02
  -6.8300000e-02
   4.6120000e-02
   9.3820000e-02
  -1.5102000e-01
   4.0960000e-02
   1.1422000e-01
  -1.1840000e-02
  -8.7700000e-03
   7.1530000e-02
  -5.1000000e-02
   5.0120000e-02
  -2.3000000e-02
   2.2400000e-02
   6.2270000e-02
  -8.3870000e-02
   5.1050000e-02
  -3.5780000e-02
  -3.3920000e-02
  -1.2480000e-02
  -2.8200000e-03
   4.5210000e-02
  -6.3450000e-02
  -2.3280000e-02
   7.7540000e-02
   9.8200000e-03
  -1.8230000e-02
   2.3300000e-03
   5.7690000e-02
   7.7650000e-02
  -1.0827000e-01
  -7.8170000e-02
   7.6110000e-02
  -1.2643000e-01
  -3.5780000e-02
   8.1700000e-03
  -9.7880000e-02
   6.7610000e-02
  -7.9180000e-02
   1.0915000e-01
   1.8860000e-02
  -2.6490000e-02
   1.1839000e-01
  -8.0640000e-02
   6.5780000e-02
   8.0340000e-02
  -1.5903000e-01
   8.4310000e-02
   4.4910000e-02
   8.9600000e-02
  -7.3230000e-02
  -1.0967000e-01
   1.1039000e-01
  -1.7000000e-03
  -1.2409000e-01
  -9.3800000e-02
   9.9560000e-02
  -1.1716000e-01
  -1.1559000e-01
   8.2990000e-02
  -2.9600000e-03
  -9.5800000e-02
  -1.0474000e-01
   3.0179000e-01
  -7.3230000e-02
  -1.7334000e-01
   2.1266000e-01
   3.8770000e-02
  -1.0433000e-01
  -6.3970000e-02
   1.2793000e-01
   3.4770000e-02
  -1.3333000e-01
   1.2390000e-02
  -4.1400000e-02
   6.8850000e-02
  -8.2450000e-02
  -1.1883000e-01
   1.0572000e-01
   2.8000000e-03
  -1.6678000e-01
   6.8300000e-03
   8.5870000e-02
  -6.6020000e-02
   7.1890000e-02
   5.0500000e-02
   1.8400000e-03
   3.3750000e-02
   1.0523000e-01
   1.8100000e-03
  -1.9492000e-01
   1.9220000e-01
  -1.3885000e-01
  -7.4770000e-02
   1.2371000e-01
  -1.3303000e-01
   2.3720000e-02
  -5.1960000e-02
   2.2800000e-03
  -2.6510000e-02
  -2.6000000e-03
   7.4990000e-02
   1.5240000e-02
  -3.5750000e-02
   1.1952000e-01
  -1.0594000e-01
  -6.3910000e-02
   1.9859000e-01
  -7.9380000e-02
   2.1000000e-02
   3.8250000e-02
  -5.4480000e-02
  -5.4340000e-02
   4.4360000e-02
  -2.9780000e-02
   7.7000000e-04
  -5.6290000e-02
   7.2380000e-02
  -1.4480000e-02
  -5.0230000e-02
   8.5740000e-02
   1.4300000e-03
  -1.2563000e-01
   3.4160000e-02
  -7.9540000e-02
   9.5220000e-02
  -1.3540000e-02
  -1.1398000e-01
   4.9960000e-02
  -4.0960000e-02
   5.8650000e-02
  -1.0435000e-01
   6.9000000e-04
   1.7169000e-01
  -4.4750000e-02
  -1.4474000e-01
   1.3726000e-01
   8.0660000e-02
  -7.5480000e-02
  -1.8792000e-01
   1.9615000e-01
   1.1900000e-02
  -1.7007000e-01
   7.4550000e-02
  -6.3060000e-02
   1.1239000e-01
  -1.2122000e-01
  -6.3000000e-04
   1.4825000e-01
  -7.0270000e-02
  -1.7660000e-02
   1.4205000e-01
   1.1771000e-01
  -1.5691000e-01
   3.4080000e-02
   2.3410000e-01
  -2.0613000e-01
  -1.4300000e-03
   3.5750000e-02
  -1.2519000e-01
   5.3960000e-02
  -4.6580000e-02
  -7.1370000e-02
   4.3840000e-02
  -1.7005000e-01
   1.1600000e-02
   2.8460000e-02
   4.0000000e-02
  -7.1480000e-02
  -6.9100000e-03
   4.8970000e-02
  -1.7550000e-02
   8.5460000e-02
  -3.4140000e-02
   4.2170000e-02
  -1.6432000e-01
   1.9270000e-02
   1.7438000e-01
  -1.5362000e-01
  -2.5830000e-02
   5.3160000e-02
   9.2560000e-02
  -9.8100000e-02
  -6.2350000e-02
   8.9850000e-02
   6.6900000e-03
  -1.7581000e-01
   6.2180000e-02
   1.1680000e-01
  -9.6620000e-02
   2.4730000e-02
  -1.1950000e-02
   1.4296000e-01
  -6.4200000e-03
  -5.7960000e-02
   9.6160000e-02
  -7.1180000e-02
  -5.9550000e-02
  -4.8500000e-02
  -4.5490000e-02
   1.2769000e-01
  -2.4953000e-01
   6.6240000e-02
   5.9610000e-02
  -1.0641000e-01
  -9.7420000e-02
   9.0370000e-02
   3.0520000e-02
  -1.3325000e-01
   4.7600000e-02
   1.0718000e-01
  -1.6150000e-02
   8.4480000e-02
  -4.4580000e-02
   3.2630000e-02
  -3.2710000e-02
  -3.6520000e-02
   4.6090000e-02
  -2.5860000e-02
   1.7580000e-02
  -3.2980000e-02
  -8.1680000e-02
  -3.5150000e-02
   3.8390000e-02
  -8.5680000e-02
   6.4790000e-02
  -5.9990000e-02
   2.4840000e-02
   9.1820000e-02
  -2.2853000e-01
   2.1693000e-01
   1.0500000e-02
  -1.0496000e-01
   1.0367000e-01
   6.2760000e-02
  -5.6510000e-02
  -1.0561000e-01
   1.1570000e-02
   1.0781000e-01
  -1.0449000e-01
  -4.4090000e-02
   8.6180000e-02
  -4.9430000e-02
  -5.8780000e-02
   7.0250000e-02
   9.4700000e-02
  -2.8870000e-02
   1.4750000e-02
   4.0250000e-02
   1.7347000e-01
  -1.7120000e-01
   1.7800000e-03
   6.2020000e-02
  -3.9370000e-02
   3.6990000e-02
  -1.4392000e-01
   1.0274000e-01
   8.9300000e-02
  -1.6410000e-01
  -5.4920000e-02
   1.1677000e-01
  -9.2290000e-02
  -1.3896000e-01
  -1.0450000e-02
   1.0723000e-01
  -4.4390000e-02
  -7.6110000e-02
  -2.9690000e-02
   1.2708000e-01
  -1.8600000e-03
  -7.7020000e-02
   8.4010000e-02
   1.0748000e-01
  -8.9400000e-03
  -1.3010000e-01
   1.0235000e-01
  -4.4530000e-02
  -5.4150000e-02
  -6.7480000e-02
   4.9790000e-02
   5.7060000e-02
  -1.0863000e-01
   6.8570000e-02
  -5.4040000e-02
   6.2710000e-02
  -3.4820000e-02
  -4.6310000e-02
   1.1409000e-01
  -2.2000000e-01
   1.3110000e-02
   1.4970000e-01
  -2.0802000e-01
   9.4810000e-02
   1.1502000e-01
  -1.8343000e-01
   1.5686000e-01
  -8.0550000e-02
  -2.8930000e-02
   4.5050000e-02
   6.7890000e-02
  -2.6650000e-02
  -1.1370000e-01
   2.1630000e-01
  -4.6530000e-02
  -1.1809000e-01
   1.5313000e-01
  -7.7980000e-02
   5.8150000e-02
  -1.1790000e-02
  -7.5760000e-02
  -1.0570000e-01
   7.3210000e-02
   3.5230000e-02
  -1.4628000e-01
   3.2680000e-02
   1.6330000e-01
  -1.1071000e-01
  -9.3140000e-02
   2.0956000e-01
  -3.5510000e-02
  -1.8951000e-01
   5.7170000e-02
   5.6340000e-02
  -5.4180000e-02
  -3.3500000e-02
   3.6080000e-02
   1.4027000e-01
  -1.1211000e-01
  -2.3910000e-02
   2.5721000e-01
  -1.5919000e-01
  -2.6974000e-01
   2.4186000e-01
  -2.7120000e-02
  -1.1261000e-01
   2.0320000e-02
   4.1540000e-02
   1.4918000e-01
  -1.5538000e-01
   3.9870000e-02
   6.8980000e-02
   5.5060000e-02
  -1.8003000e-01
   5.9910000e-02
   3.3640000e-02
  -2.0851000e-01
   1.3410000e-01
  -1.5234000e-01
   1.9930000e-02
   6.3900000e-03
  -7.2050000e-02
   1.8831000e-01
  -2.6442000e-01
  -1.7900000e-02
   1.3616000e-01
  -1.2150000e-02
  -4.6500000e-02
  -1.2100000e-01
   2.2214000e-01
  -4.1150000e-02
  -3.2900000e-02
   1.2012000e-01
   5.5910000e-02
   1.9170000e-02
  -2.1800000e-02
  -3.0000000e-05
   1.2223000e-01
  -4.1480000e-02
  -6.9230000e-02
   1.0161000e-01
  -9.3610000e-02
   6.6820000e-02
   2.3280000e-02
  -5.3500000e-03
  -6.7830000e-02
  -9.6590000e-02
   1.4405000e-01
  -1.7685000e-01
   1.1410000e-02
   6.2020000e-02
  -1.2324000e-01
   3.9240000e-02
   3.2110000e-02
  -8.6090000e-02
   2.9720000e-02
   1.1760000e-02
  -4.7490000e-02
   1.0561000e-01
  -1.8932000e-01
   1.3227000e-01
   3.2760000e-02
  -2.8240000e-02
  -3.6410000e-02
  -4.4280000e-02
   8.5110000e-02
  -6.1250000e-02
  -1.1398000e-01
   1.4307000e-01
   5.8260000e-02
  -1.5458000e-01
   9.3440000e-02
   1.0397000e-01
  -5.6510000e-02
  -5.1050000e-02
   1.4795000e-01
  -1.1699000e-01
  -4.0000000e-03
   7.7840000e-02
  -1.0611000e-01
  -7.4000000e-03
   3.2110000e-02
  -2.7560000e-02
  -7.7840000e-02
  -3.1970000e-02
   1.2267000e-01
  -6.8440000e-02
  -2.5770000e-02
   6.9040000e-02
   2.0370000e-02
  -1.1957000e-01
   1.3740000e-02
   9.2900000e-03
   3.4350000e-02
   1.1570000e-02
  -5.2530000e-02
   2.5750000e-02
   6.4510000e-02
  -1.1847000e-01
   3.0490000e-02
   1.3695000e-01
  -7.6060000e-02
  -1.0745000e-01
   1.2313000e-01
  -1.0670000e-02
  -4.6120000e-02
  -4.2280000e-02
  -2.3360000e-02
   2.7280000e-02
  -7.2030000e-02
  -2.9720000e-02
   8.2230000e-02
  -6.1060000e-02
   3.7800000e-03
   1.6830000e-02
  -7.4580000e-02
  -3.2680000e-02
  -3.1120000e-02
   9.2510000e-02
  -7.3510000e-02
   1.2280000e-02
  -1.5100000e-03
   2.1660000e-02
   7.2800000e-02
  -5.1980000e-02
   2.7990000e-02
   8.1650000e-02
  -3.1280000e-02
  -1.6330000e-01
   1.2944000e-01
  -2.8130000e-02
  -2.3960000e-02
  -4.9050000e-02
   1.1160000e-02
   9.4150000e-02
  -2.0840000e-02
  -1.3169000e-01
   1.5497000e-01
   1.4444000e-01
  -9.8570000e-02
  -1.0057000e-01
   1.1006000e-01
   2.7340000e-02
  -1.9464000e-01
   8.3600000e-03
   1.2179000e-01
  -7.0960000e-02
  -1.1998000e-01
   2.2050000e-01
  -8.2780000e-02
  -6.2070000e-02
   5.4600000e-03
   3.3260000e-02
   6.6240000e-02
  -3.5810000e-02
  -3.9650000e-02
  -1.2910000e-02
   1.2075000e-01
  -4.9900000e-02
  -7.2410000e-02
   4.1980000e-02
   5.2290000e-02
  -5.1630000e-02
  -2.9800000e-02
   1.7050000e-02
  -4.5620000e-02
   3.2680000e-02
  -1.1082000e-01
   6.0600000e-03
   4.2330000e-02
  -6.2460000e-02
  -2.9800000e-02
   3.3810000e-02
   3.5950000e-02
  -3.5370000e-02
  -2.4620000e-02
   4.5930000e-02
  -5.8100000e-03
   2.6460000e-02
  -9.0200000e-03
  -5.9550000e-02
  -5.7500000e-02
   6.2160000e-02
  -2.3800000e-02
  -2.8674000e-01
   1.8776000e-01
   7.8910000e-02
  -2.6733000e-01
   1.3679000e-01
   7.9130000e-02
  -3.1420000e-02
  -2.4240000e-02
   1.2360000e-01
   6.7120000e-02
  -1.5568000e-01
   4.7020000e-02
   1.0323000e-01
  -1.8589000e-01
   2.0400000e-02
   2.7420000e-02
   2.3960000e-02
   1.0655000e-01
  -1.0271000e-01
  -3.3480000e-02
  -1.7680000e-02
  -5.7390000e-02
   6.3600000e-03
  -1.2270000e-01
   2.6135000e-01
  -5.0340000e-02
  -5.6590000e-02
   9.9170000e-02
  -2.5060000e-02
   1.1870000e-02
  -6.5390000e-02
   2.8570000e-02
  -7.6220000e-02
  -7.0270000e-02
   7.9540000e-02
  -9.4370000e-02
  -5.7850000e-02
   6.4650000e-02
   8.6400000e-03
   9.4070000e-02
   2.1880000e-02
   3.2100000e-03
   1.4915000e-01
  -7.8610000e-02
   3.0680000e-02
   5.5660000e-02
  -4.7980000e-02
  -9.5060000e-02
  -1.0131000e-01
   8.3130000e-02
  -8.4390000e-02
   9.9800000e-02
  -3.0790000e-02
   5.7850000e-02
   1.1373000e-01
  -1.4809000e-01
   3.7750000e-02
   2.8840000e-02
  -6.5690000e-02
  -7.8440000e-02
   6.7200000e-03
  -1.2390000e-02
  -5.0780000e-02
   9.3390000e-02
   3.7070000e-02
  -2.1669000e-01
   1.8420000e-01
  -1.0161000e-01
  -7.0880000e-02
   1.2741000e-01
   3.6820000e-02
  -1.2324000e-01
  -6.0570000e-02
   1.3410000e-01
  -8.9550000e-02
   6.6100000e-03
   2.8870000e-02
  -6.3800000e-02
   8.8040000e-02
  -6.8020000e-02
   6.0350000e-02
  -1.0230000e-02
  -7.7370000e-02
   6.3360000e-02
  -1.3059000e-01
   4.2390000e-02
   8.1620000e-02
  -1.0540000e-01
   9.4540000e-02
  -1.3570000e-02
   2.3520000e-02
   3.3150000e-02
  -3.3310000e-02
   6.7860000e-02
  -5.3300000e-02
  -1.5050000e-02
   1.5705000e-01
  -2.2647000e-01
  -8.0230000e-02
   1.8724000e-01
  -1.5590000e-01
  -3.4900000e-02
   5.4040000e-02
   2.7770000e-02
   3.0350000e-02
  -9.1440000e-02
  -7.7300000e-03
   2.4186000e-01
  -1.7131000e-01
  -7.3970000e-02
   2.6949000e-01
  -9.5330000e-02
   1.2200000e-02
  -5.2040000e-02
   5.1030000e-02
  -1.6018000e-01
  -1.1889000e-01
   1.2980000e-01
  -8.0470000e-02
   4.7700000e-03
  -5.9940000e-02
   2.9060000e-02
   1.7970000e-01
  -1.5297000e-01
  -7.2400000e-03
   1.6347000e-01
  -9.4040000e-02
  -1.0246000e-01
   2.4778000e-01
  -6.7340000e-02
  -1.6728000e-01
  -1.2600000e-03
   8.0940000e-02
   1.7930000e-02
  -7.3810000e-02
   1.0043000e-01
  -1.1730000e-02
  -7.8170000e-02
  -1.6510000e-02
   2.6380000e-02
   8.0200000e-02
  -1.2341000e-01
  -8.4780000e-02
   2.0150000e-01
  -3.4000000e-02
  -3.5370000e-02
   1.1505000e-01
  -5.2290000e-02
  -8.9160000e-02
   1.3630000e-02
   2.5470000e-02
  -1.8340000e-02
  -3.3530000e-02
   8.0010000e-02
  -2.7400000e-03
  -4.1980000e-02
   5.8780000e-02
  -6.7390000e-02
  -9.6800000e-03
   5.6200000e-03
  -7.3780000e-02
   1.4282000e-01
  -5.1300000e-02
   8.9900000e-03
   5.8460000e-02
  -1.3460000e-02
   6.2270000e-02
   3.1530000e-02
  -7.1450000e-02
   4.2330000e-02
   4.8970000e-02
  -1.0010000e-01
  -5.1130000e-02
   7.1510000e-02
  -3.8930000e-02
  -2.6180000e-02
  -4.7570000e-02
   6.3280000e-02
  -1.0978000e-01
   1.2834000e-01
   7.3210000e-02
  -1.2736000e-01
   2.4650000e-02
  -3.5340000e-02
   3.8360000e-02
   4.6580000e-02
   4.4700000e-03
  -2.0114000e-01
   9.0750000e-02
   2.4870000e-02
  -8.1600000e-02
  -2.4320000e-02
  -4.2420000e-02
   1.7778000e-01
  -3.7920000e-02
  -1.5848000e-01
   9.1800000e-02
   1.2914000e-01
  -3.4410000e-02
  -1.2187000e-01
   1.4331000e-01
   8.5460000e-02
  -1.9607000e-01
   1.6810000e-01
  -8.5300000e-03
  -4.5900000e-02
   1.4640000e-02
  -4.2280000e-02
  -1.8010000e-02
   3.5400000e-03
   3.2740000e-02
  -7.0270000e-02
   1.2060000e-02
  -2.1400000e-03
   6.3310000e-02
  -7.3860000e-02
   3.3090000e-02
  -2.1880000e-02
   3.2600000e-03
   1.3854000e-01
  -1.5091000e-01
  -2.4370000e-02
   8.1400000e-02
  -4.4880000e-02
  -2.0945000e-01
   1.1494000e-01
   1.1039000e-01
  -1.9401000e-01
  -3.3000000e-04
   2.7703000e-01
  -3.4110000e-02
  -2.4375000e-01
   2.6346000e-01
  -2.6490000e-02
  -1.7369000e-01
   1.2393000e-01
  -2.2810000e-02
  -2.7860000e-02
  -2.2430000e-02
   4.3900000e-02
   2.4650000e-02
   2.1030000e-02
  -5.0890000e-02
   6.8550000e-02
   7.0030000e-02
  -2.4750000e-01
  -5.4450000e-02
   2.2749000e-01
  -6.6630000e-02
  -2.1690000e-02
   4.0660000e-02
  -9.2700000e-03
  -2.2020000e-02
  -1.8400000e-02
   2.0970000e-02
   3.3200000e-02
   1.9410000e-02
  -1.0427000e-01
  -1.3490000e-02
   1.2187000e-01
  -3.8250000e-02
   5.5190000e-02
  -3.0430000e-02
   9.9800000e-03
   1.1579000e-01
  -1.8266000e-01
   3.9020000e-02
   1.4120000e-01
  -9.4780000e-02
   1.7140000e-02
   1.0383000e-01
   8.7630000e-02
  -1.6922000e-01
  -2.0430000e-02
   1.6286000e-01
  -1.2933000e-01
  -8.5800000e-03
  -3.5290000e-02
  -8.2060000e-02
  -5.6840000e-02
   1.1066000e-01
  -1.4529000e-01
  -1.0402000e-01
   2.1743000e-01
  -4.6910000e-02
  -1.0890000e-02
   1.4500000e-02
   4.3760000e-02
  -1.0816000e-01
   3.7000000e-03
   3.2190000e-02
   1.7930000e-02
   1.2150000e-02
  -6.0050000e-02
   3.3150000e-02
  -3.2240000e-02
   7.8530000e-02
  -1.4151000e-01
   1.4809000e-01
   1.2404000e-01
  -3.7560000e-02
  -1.2091000e-01
   2.9300000e-03
   1.1683000e-01
  -9.8210000e-02
   3.3420000e-02
   9.6000000e-04
   9.9000000e-03
   5.6620000e-02
   2.4870000e-02
   3.2190000e-02
  -3.8390000e-02
  -7.3860000e-02
  -2.9100000e-03
  -1.1500000e-03
  -1.1551000e-01
  -1.7110000e-02
  -1.0145000e-01
   7.0300000e-02
   8.1540000e-02
  -7.9180000e-02
  -1.3200000e-03
   4.1400000e-02
  -3.7650000e-02
   1.3870000e-02
   8.7240000e-02
  -7.3010000e-02
   2.1000000e-02
  -8.1700000e-03
   4.7490000e-02
   2.1410000e-02
  -1.1381000e-01
   6.0320000e-02
   4.3570000e-02
  -1.6940000e-02
   1.6670000e-02
  -3.7950000e-02
   8.9900000e-03
  -3.3370000e-02
   4.9490000e-02
  -1.0191000e-01
   1.4010000e-02
   1.2555000e-01
  -1.0773000e-01
   1.4562000e-01
   6.0900000e-03
  -8.3840000e-02
   3.3010000e-02
   1.6777000e-01
  -1.1102000e-01
  -9.8490000e-02
   1.9248000e-01
  -1.7674000e-01
   2.0780000e-02
  -1.9690000e-02
   1.3827000e-01
  -1.2105000e-01
  -1.3602000e-01
   1.9382000e-01
  -3.5920000e-02
  -1.1187000e-01
  -9.6400000e-02
   9.8270000e-02
  -6.1330000e-02
  -6.1770000e-02
   1.3673000e-01
  -1.2368000e-01
  -1.0471000e-01
   1.9319000e-01
  -3.6500000e-03
  -4.1540000e-02
   4.0000000e-02
   3.2900000e-02
   6.7700000e-03
  -1.7613000e-01
  -3.7340000e-02
   2.4696000e-01
  -8.4010000e-02
  -6.3450000e-02
   4.9350000e-02
  -1.7960000e-02
   9.7010000e-02
  -1.9286000e-01
   1.4038000e-01
   2.8900000e-02
  -1.3539000e-01
   1.3205000e-01
  -1.1340000e-01
   1.2086000e-01
   3.5120000e-02
  -2.3486000e-01
   1.7561000e-01
   9.6210000e-02
  -2.2861000e-01
   2.5940000e-02
   1.9678000e-01
  -1.4156000e-01
  -1.0386000e-01
   5.3300000e-02
   3.5230000e-02
  -3.9070000e-02
  -7.1920000e-02
   8.9160000e-02
  -6.5120000e-02
   3.8600000e-02
  -3.3000000e-04
  -7.4930000e-02
   9.1140000e-02
  -1.0035000e-01
   1.0560000e-02
   6.3280000e-02
   4.4090000e-02
  -1.9930000e-02
   4.4720000e-02
   1.3553000e-01
  -6.3200000e-02
  -5.8370000e-02
   6.2400000e-02
   2.6790000e-02
   1.4390000e-02
   1.7300000e-02
  -1.1500000e-03
  -7.7650000e-02
  -8.2470000e-02
   8.4120000e-02
  -3.3970000e-02
  -8.2300000e-03
  -1.6180000e-02
  -2.5860000e-02
  -1.1442000e-01
   1.3429000e-01
  -7.7590000e-02
   3.1340000e-02
  -2.3300000e-03
  -2.5860000e-02
   2.0023000e-01
  -1.6020000e-01
   1.5096000e-01
  -1.0452000e-01
  -7.8910000e-02
   1.7740000e-02
  -1.3980000e-02
   6.7810000e-02
  -7.5920000e-02
  -2.2780000e-02
  -2.3300000e-03
  -8.4670000e-02
   1.0792000e-01
   1.3742000e-01
  -1.6108000e-01
   2.4570000e-02
   7.6690000e-02
  -1.6200000e-02
  -6.4490000e-02
  -7.1000000e-03
   5.3770000e-02
  -1.6010000e-02
  -3.9180000e-02
  -4.8010000e-02
   1.0112000e-01
  -4.9110000e-02
  -6.7700000e-03
  -2.7580000e-02
   1.8584000e-01
  -3.5310000e-02
  -1.7803000e-01
   1.1239000e-01
   6.2200000e-03
  -1.0390000e-02
  -1.1730000e-02
  -3.4850000e-02
  -6.6320000e-02
   8.1380000e-02
  -7.5180000e-02
   3.0760000e-02
   1.9600000e-02
   9.7140000e-02
  -5.3820000e-02
  -1.0666000e-01
   1.0531000e-01
  -1.1392000e-01
   6.7970000e-02
   7.2100000e-03
  -2.6300000e-03
  -5.9830000e-02
  -7.4030000e-02
   1.1751000e-01
  -9.6790000e-02
   1.3270000e-02
   2.0920000e-02
   8.0530000e-02
   6.8660000e-02
  -8.8940000e-02
   1.9690000e-02
   4.2280000e-02
  -7.4710000e-02
   3.2440000e-02
   4.6900000e-03
   6.6130000e-02
  -1.3542000e-01
  -7.0900000e-02
   1.1938000e-01
   8.5500000e-03
  -3.7970000e-02
   4.3870000e-02
  -1.3790000e-02
  -5.6340000e-02
   2.6130000e-02
  -5.5880000e-02
   5.1380000e-02
   1.1020000e-02
  -1.3418000e-01
   9.0210000e-02
   3.2080000e-02
  -3.3500000e-03
  -1.3110000e-02
  -5.0420000e-02
   6.5560000e-02
  -1.1549000e-01
   9.1770000e-02
  -9.7200000e-02
   1.2253000e-01
   1.0117000e-01
  -6.1220000e-02
   3.3200000e-02
   1.3520000e-02
   5.4340000e-02
   1.1190000e-02
  -3.6250000e-02
   6.1580000e-02
   1.1252000e-01
  -1.4233000e-01
   1.3200000e-03
   4.4030000e-02
  -6.6870000e-02
  -2.1660000e-02
   1.4474000e-01
   2.6000000e-03
  -1.1198000e-01
   1.0054000e-01
   6.6960000e-02
  -1.5782000e-01
   1.3200000e-03
   4.7630000e-02
   5.3580000e-02
   1.1100000e-02
  -6.2570000e-02
  -2.8160000e-02
   1.1011000e-01
   4.2910000e-02
  -1.4200000e-01
   7.4440000e-02
  -8.4390000e-02
  -1.3200000e-03
   1.7915000e-01
  -1.2690000e-02
   8.6310000e-02
  -2.0495000e-01
  -9.4890000e-02
   2.0509000e-01
  -1.3481000e-01
   6.9860000e-02
  -1.0200000e-02
  -2.7200000e-02
   3.7510000e-02
  -1.8530000e-02
  -6.6760000e-02
   9.2210000e-02
   2.3880000e-02
  -9.5500000e-02
   7.5320000e-02
  -2.9580000e-02
  -1.9119000e-01
   1.0202000e-01
   8.4750000e-02
  -1.4296000e-01
  -3.6410000e-02
   9.1140000e-02
  -5.7190000e-02
   2.0180000e-02
   1.4781000e-01
  -5.4860000e-02
  -1.1768000e-01
   1.0010000e-01
   6.3170000e-02
  -1.9664000e-01
   8.1930000e-02
   7.3430000e-02
  -4.0000000e-02
   2.7250000e-02
  -8.8670000e-02
  -5.1880000e-02
   5.6620000e-02
  -2.8620000e-02
  -3.5600000e-03
   7.6200000e-02
   6.2000000e-03
  -9.9500000e-02
   3.3500000e-03
  -1.2120000e-02
  -1.0178000e-01
  -3.7430000e-02
   1.1003000e-01
  -8.9520000e-02
  -2.9390000e-02
   1.8381000e-01
  -7.3800000e-03
   7.9000000e-03
   1.7520000e-02
  -2.3000000e-02
   6.1690000e-02
  -3.7260000e-02
  -1.0677000e-01
  -1.5880000e-02
   9.9120000e-02
  -7.0440000e-02
   6.3610000e-02
   1.2280000e-02
  -6.0290000e-02
   8.5050000e-02
   8.8800000e-03
  -6.7400000e-03
  -3.5600000e-03
   6.7670000e-02
  -1.0501000e-01
   5.1380000e-02
   8.9440000e-02
  -2.4539000e-01
   9.4700000e-02
  -8.7200000e-03
   8.7520000e-02
  -7.4390000e-02
  -4.8780000e-02
   5.1300000e-03
   4.6860000e-02
   9.4900000e-03
  -3.6030000e-02
   9.5330000e-02
  -1.3476000e-01
   4.5020000e-02
   1.3050000e-02
  -1.8370000e-02
  -4.1130000e-02
  -2.0210000e-02
   1.2313000e-01
   1.8700000e-02
  -1.7386000e-01
   7.4550000e-02
   1.3136000e-01
  -1.5645000e-01
  -6.9640000e-02
   1.9906000e-01
  -9.2260000e-02
  -1.5620000e-01
   1.3772000e-01
   4.5130000e-02
  -1.3427000e-01
  -2.3330000e-02
   5.6500000e-03
   8.7600000e-02
  -6.7860000e-02
  -1.4408000e-01
   9.2070000e-02
  -1.3200000e-03
  -1.2230000e-02
   1.8860000e-02
   3.2630000e-02
  -6.3230000e-02
  -8.9660000e-02
   1.4315000e-01
  -6.1940000e-02
  -7.2800000e-02
   1.0452000e-01
   1.1839000e-01
  -6.2400000e-02
  -3.4440000e-02
  -3.1230000e-02
  -3.7810000e-02
   2.4059000e-01
  -1.3821000e-01
   3.0790000e-02
   7.8200000e-02
   1.5300000e-02
   1.9270000e-02
  -4.9020000e-02
   2.1965000e-01
  -2.1457000e-01
   6.5720000e-02
   6.8680000e-02
  -6.6460000e-02
  -6.2270000e-02
  -2.2570000e-02
   8.5600000e-02
  -1.5467000e-01
  -8.3710000e-02
   1.2648000e-01
   0.0000000e+00
  -5.0940000e-02
  -1.3062000e-01
   1.0959000e-01
   1.2610000e-01
  -3.9320000e-01
   7.7000000e-03
   2.3747000e-01
  -1.9500000e-01
  -9.1630000e-02
   1.7134000e-01
  -3.6080000e-02
  -6.2210000e-02
  -7.9490000e-02
   1.1987000e-01
   1.4677000e-01
  -6.1170000e-02
  -1.0863000e-01
   2.4114000e-01
   3.0350000e-02
  -4.3100000e-02
   3.0790000e-02
  -9.1900000e-03
   1.1080000e-01
  -9.6210000e-02
  -8.5080000e-02
  -1.4530000e-02
  -9.1250000e-02
   2.2430000e-02
  -4.0000000e-03
  -1.6310000e-02
  -9.0200000e-03
   6.9560000e-02
  -9.9800000e-02
   5.4120000e-02
  -2.1910000e-02
  -1.0405000e-01
   1.0534000e-01
  -1.2341000e-01
   9.4780000e-02
   1.1210000e-02
   3.7120000e-02
  -6.4730000e-02
  -4.1950000e-02
   1.3358000e-01
  -2.4540000e-02
   2.4320000e-02
   9.2810000e-02
   7.4630000e-02
  -1.3710000e-02
   1.1417000e-01
  -7.5560000e-02
  -3.0130000e-02
  -6.5010000e-02
  -6.4570000e-02
   4.6560000e-02
  -7.7680000e-02
   3.4600000e-02
  -4.3160000e-02
   7.9350000e-02
   8.1320000e-02
  -1.1444000e-01
   2.6270000e-02
  -2.6570000e-02
  -5.0750000e-02
  -1.1980000e-02
  -1.3130000e-02
   1.9060000e-02
  -8.4530000e-02
   4.3270000e-02
   1.0869000e-01
   3.3920000e-02
  -5.6100000e-02
   1.9470000e-02
   4.6970000e-02
   3.4500000e-03
   1.8590000e-02
  -8.0440000e-02
  -2.6900000e-02
  -2.2810000e-02
   5.5300000e-02
  -1.2310000e-02
   6.2730000e-02
   8.5380000e-02
  -6.4020000e-02
   1.5220000e-02
  -3.0570000e-02
  -3.8300000e-02
   3.2240000e-02
  -7.4170000e-02
   3.7480000e-02
   2.8270000e-02
  -6.6630000e-02
   2.9910000e-02
  -4.4310000e-02
  -1.4891000e-01
