# Supplementary material for: A Novel Classification Method for Flutter Signals Based on the CNN and STFT
Source: Hindawi journal article supplement (doi:10.1155/2019/9375437), 2019-04-09
Supplement: f1 [file 9375437.f1.zip › 00_25_z18.0_21channel.txt]

  -1.3440000e-01
   4.3400000e-02
   8.7160000e-02
   3.8060000e-02
   6.2500000e-03
  -7.8470000e-02
   1.4940000e-01
   5.4450000e-02
  -1.2785000e-01
  -1.3240000e-02
   5.8400000e-03
   1.2150000e-02
   6.8520000e-02
  -4.4090000e-02
  -1.0060000e-02
  -4.8530000e-02
   6.4240000e-02
   4.7050000e-02
  -1.3704000e-01
   1.0611000e-01
   2.0000000e-03
  -6.0900000e-03
   3.8600000e-02
  -2.7090000e-02
   2.3900000e-03
  -4.3210000e-02
   1.0087000e-01
  -1.7479000e-01
   8.4970000e-02
  -2.3000000e-03
   2.6000000e-03
  -1.4118000e-01
   1.1664000e-01
   1.0200000e-01
  -2.1839000e-01
   1.0427000e-01
  -7.3150000e-02
   2.1700000e-03
   4.7840000e-02
  -3.7800000e-03
  -6.2510000e-02
   4.6200000e-02
   4.1480000e-02
   6.8410000e-02
  -9.8710000e-02
   1.4326000e-01
  -3.0460000e-02
   1.1630000e-02
  -3.9670000e-02
  -5.1110000e-02
   7.2490000e-02
  -9.7170000e-02
   6.8300000e-03
   8.4610000e-02
   4.4100000e-03
   1.1210000e-02
  -3.5950000e-02
   8.4670000e-02
   1.0167000e-01
  -5.5060000e-02
  -1.0013000e-01
  -2.1110000e-02
  -2.6130000e-02
   7.2160000e-02
  -5.9220000e-02
  -1.2371000e-01
   9.6840000e-02
  -1.7380000e-02
  -6.7750000e-02
   1.0800000e-01
  -2.4160000e-02
  -2.8680000e-02
   4.7410000e-02
   1.0610000e-02
  -3.1060000e-02
   1.6560000e-02
  -1.7561000e-01
   5.5000000e-04
   4.6200000e-02
   1.0556000e-01
  -5.1190000e-02
  -7.1810000e-02
   1.3109000e-01
  -1.2480000e-02
  -1.7880000e-02
   4.5200000e-03
  -8.0120000e-02
   1.4765000e-01
  -3.8000000e-02
  -3.5010000e-02
  -1.8400000e-03
  -2.6430000e-02
   8.7380000e-02
   7.3320000e-02
   1.7220000e-02
   4.7840000e-02
  -3.3590000e-02
  -1.8150000e-02
  -1.4810000e-02
   3.9450000e-02
  -2.4650000e-02
  -4.3650000e-02
  -5.5930000e-02
  -1.7901000e-01
   2.3960000e-02
   1.8962000e-01
  -1.2596000e-01
  -3.2300000e-02
   4.1180000e-02
  -4.2830000e-02
   2.3720000e-02
  -4.4280000e-02
   1.4150000e-02
   8.2750000e-02
   6.2430000e-02
  -4.9100000e-03
  -1.2494000e-01
   1.1562000e-01
   7.3670000e-02
  -2.0430000e-02
  -5.4670000e-02
   4.7160000e-02
   2.1820000e-02
  -1.4809000e-01
  -1.3740000e-02
   1.6481000e-01
  -6.4400000e-03
  -2.7360000e-02
   8.1200000e-03
   6.3140000e-02
  -1.3130000e-02
  -1.5240000e-02
  -5.7030000e-02
  -4.0770000e-02
   9.7280000e-02
  -9.3220000e-02
  -9.2070000e-02
   1.7000000e-03
  -3.5120000e-02
   4.8060000e-02
  -3.3500000e-02
  -2.6600000e-02
   6.9040000e-02
   1.0021000e-01
  -6.5940000e-02
   1.3300000e-02
   2.3060000e-02
   4.1460000e-02
  -8.3100000e-03
  -2.2620000e-02
   4.1700000e-02
  -8.7000000e-02
   3.5200000e-02
   1.0345000e-01
   2.3800000e-02
  -1.8450000e-02
  -1.2982000e-01
   4.5900000e-02
  -1.9080000e-02
  -2.4290000e-02
  -1.6260000e-02
   8.1400000e-03
   1.5247000e-01
  -6.7200000e-03
   6.5500000e-03
   3.5420000e-02
   2.6180000e-02
  -4.1290000e-02
  -1.4392000e-01
   1.1063000e-01
  -1.4828000e-01
  -2.8980000e-02
  -7.4410000e-02
   7.1590000e-02
  -1.0230000e-02
   1.4070000e-02
  -9.4300000e-03
   1.2060000e-02
   2.0320000e-02
   3.8520000e-02
   1.3350000e-02
  -5.5710000e-02
   5.9200000e-02
   6.4820000e-02
  -7.4850000e-02
  -7.8390000e-02
   5.5110000e-02
   2.3060000e-02
  -7.6390000e-02
   7.5760000e-02
   8.0860000e-02
  -6.7970000e-02
  -3.8360000e-02
   1.1269000e-01
  -1.1980000e-02
  -1.3879000e-01
   4.7100000e-02
  -1.6670000e-02
   9.3520000e-02
  -9.9800000e-03
  -1.2379000e-01
   1.7397000e-01
  -1.0688000e-01
  -2.4590000e-02
   9.4700000e-02
  -1.2371000e-01
   1.5300000e-02
   7.4280000e-02
   5.5770000e-02
  -8.8530000e-02
  -2.6540000e-02
  -8.2170000e-02
   1.4060000e-01
   5.9330000e-02
  -9.8760000e-02
  -2.2040000e-02
   3.2300000e-02
  -1.6750000e-02
  -8.4480000e-02
   3.4160000e-02
   1.0610000e-02
   5.9550000e-02
   7.7810000e-02
  -1.1277000e-01
   1.2717000e-01
   1.6717000e-01
  -1.4225000e-01
  -5.3960000e-02
   3.5780000e-02
  -5.5030000e-02
   1.2500000e-02
  -8.9440000e-02
   1.2010000e-02
   5.5220000e-02
   3.8360000e-02
  -3.5180000e-02
  -1.2069000e-01
   1.4150000e-02
   7.0490000e-02
  -3.1060000e-02
  -5.8570000e-02
  -1.2450000e-02
  -8.7270000e-02
   1.6040000e-02
   1.2264000e-01
  -1.2970000e-02
  -1.5220000e-02
   8.8600000e-03
   8.3210000e-02
  -2.8320000e-02
  -4.8280000e-02
  -7.1600000e-03
   1.0860000e-02
   1.9800000e-02
   1.7110000e-02
  -7.8030000e-02
  -2.7200000e-02
   2.1660000e-02
   5.8590000e-02
  -1.5080000e-02
  -3.1780000e-02
   8.5460000e-02
   1.4010000e-02
   5.3410000e-02
   1.1294000e-01
  -1.1800000e-03
  -5.3820000e-02
  -7.8330000e-02
  -1.3790000e-02
  -6.1310000e-02
  -1.7710000e-02
  -6.2130000e-02
   7.2330000e-02
   8.0250000e-02
  -1.0073000e-01
   4.9570000e-02
   2.3090000e-02
  -5.4480000e-02
   4.8370000e-02
  -1.6374000e-01
   6.4350000e-02
   1.3446000e-01
  -7.9200000e-03
  -5.4730000e-02
  -2.6300000e-03
   1.2330000e-01
  -4.1700000e-03
  -5.7990000e-02
   1.2780000e-02
   4.0910000e-02
  -9.5960000e-02
   6.1800000e-02
  -2.9200000e-02
   1.2150000e-02
  -6.9920000e-02
  -1.6830000e-02
   1.5464000e-01
  -1.4230000e-02
  -1.0559000e-01
   1.5550000e-02
   7.6280000e-02
  -1.5190000e-02
  -1.9988000e-01
   5.3140000e-02
   1.9146000e-01
  -1.8924000e-01
  -1.2593000e-01
   1.6733000e-01
   3.4270000e-02
  -1.6799000e-01
  -3.8300000e-02
   1.8052000e-01
  -4.4880000e-02
  -6.3800000e-02
   3.6880000e-02
   1.1104000e-01
   7.6060000e-02
  -4.6970000e-02
  -1.1490000e-02
   1.0402000e-01
   1.2120000e-02
  -1.1077000e-01
   1.4280000e-02
   3.3860000e-02
  -1.0172000e-01
  -5.4400000e-02
   3.5920000e-02
  -5.8780000e-02
   3.3780000e-02
  -1.9700000e-03
   3.4160000e-02
  -1.1244000e-01
   3.1150000e-02
   1.5467000e-01
  -1.0419000e-01
  -5.9280000e-02
   1.3930000e-02
   3.7400000e-02
   1.5519000e-01
  -1.6777000e-01
   8.0310000e-02
  -4.6280000e-02
   5.7600000e-03
  -1.0348000e-01
  -5.7600000e-03
   5.8590000e-02
   5.3030000e-02
   4.5510000e-02
  -1.1337000e-01
   1.4518000e-01
  -1.0814000e-01
   1.4016000e-01
  -8.8340000e-02
   1.9110000e-02
   0.0000000e+00
  -2.0890000e-02
   3.6690000e-02
  -1.3298000e-01
   6.1960000e-02
  -1.1190000e-02
   3.6030000e-02
  -5.1500000e-03
  -2.3110000e-02
   1.0140000e-02
  -3.0300000e-02
  -2.4900000e-02
   3.4880000e-02
   2.9150000e-02
  -2.7090000e-02
   1.1573000e-01
   3.3310000e-02
  -9.0510000e-02
  -7.9050000e-02
   2.6620000e-02
   9.0500000e-03
  -1.6090000e-02
  -6.3800000e-02
   6.1030000e-02
  -3.6960000e-02
   6.9700000e-02
   1.1625000e-01
  -4.5980000e-02
  -2.4980000e-02
  -1.1014000e-01
   1.0553000e-01
   9.0840000e-02
  -1.0153000e-01
   3.2790000e-02
  -1.1466000e-01
   2.1468000e-01
  -1.1006000e-01
  -1.6037000e-01
   2.0108000e-01
  -1.5935000e-01
   5.2920000e-02
   1.1840000e-02
  -1.0923000e-01
   1.0466000e-01
  -8.2010000e-02
  -9.7010000e-02
   9.5090000e-02
  -5.8400000e-02
   5.6870000e-02
  -1.9000000e-04
   3.6200000e-03
  -8.6180000e-02
   4.3000000e-03
   1.2667000e-01
  -1.4523000e-01
   1.0608000e-01
  -7.0080000e-02
  -6.4820000e-02
   9.2900000e-03
   3.8280000e-02
   4.2580000e-02
  -5.4970000e-02
   3.0320000e-02
  -7.5700000e-03
   5.7110000e-02
  -1.0718000e-01
   7.5430000e-02
   1.5247000e-01
   1.3700000e-03
  -7.1590000e-02
  -4.7870000e-02
   1.0370000e-01
  -1.6081000e-01
   5.4340000e-02
   6.3660000e-02
   3.2380000e-02
  -8.5680000e-02
  -9.4150000e-02
   1.8005000e-01
  -2.9640000e-02
  -1.3960000e-02
  -9.9310000e-02
   1.0068000e-01
   1.5980000e-02
  -6.2650000e-02
   3.6490000e-02
  -2.6900000e-03
   1.6260000e-02
  -1.7556000e-01
   5.0010000e-02
   6.4570000e-02
  -4.0170000e-02
   2.8620000e-02
  -1.0361000e-01
   1.4153000e-01
   9.4600000e-03
  -1.4189000e-01
   6.7860000e-02
  -7.2100000e-03
   2.6600000e-02
  -6.9310000e-02
  -6.4820000e-02
   1.8987000e-01
  -1.4532000e-01
  -2.7170000e-02
   1.6253000e-01
   1.9080000e-02
  -2.2180000e-02
  -1.0257000e-01
   2.3990000e-02
   2.9000000e-01
  -1.0570000e-01
  -1.7520000e-01
   1.8288000e-01
   6.4430000e-02
  -1.5387000e-01
  -6.4200000e-03
   8.2420000e-02
   4.8200000e-02
  -1.8987000e-01
  -5.3710000e-02
   5.0010000e-02
  -2.0430000e-02
   4.3130000e-02
  -1.5546000e-01
  -5.5440000e-02
   1.5121000e-01
  -1.1697000e-01
   5.6670000e-02
   3.2460000e-02
  -1.0257000e-01
   1.9779000e-01
  -8.8230000e-02
  -3.5400000e-03
   8.7190000e-02
  -7.0300000e-02
   8.1600000e-02
  -5.7140000e-02
  -6.4320000e-02
   5.1630000e-02
   7.6000000e-02
  -7.9730000e-02
   9.2070000e-02
   4.7840000e-02
  -6.1500000e-02
   8.2230000e-02
   7.9200000e-03
  -9.6000000e-03
  -1.0068000e-01
  -1.3330000e-02
   9.8240000e-02
  -1.6632000e-01
   7.4690000e-02
  -2.7000000e-04
  -1.0400000e-03
  -2.7770000e-02
  -6.6680000e-02
   9.6510000e-02
  -9.1630000e-02
   7.1970000e-02
  -3.1700000e-02
   2.2760000e-02
   3.5970000e-02
  -6.9150000e-02
   9.5170000e-02
  -2.3940000e-02
  -1.1236000e-01
   2.2870000e-02
   2.6680000e-02
   5.7470000e-02
   2.5140000e-02
  -1.1066000e-01
   5.7660000e-02
   1.0860000e-02
  -6.2130000e-02
   9.3520000e-02
  -9.7140000e-02
  -4.1290000e-02
   1.0784000e-01
   8.6560000e-02
  -1.1085000e-01
   2.8190000e-02
  -1.6234000e-01
   4.0410000e-02
   1.5872000e-01
  -1.6659000e-01
   4.7020000e-02
   4.1950000e-02
   7.6520000e-02
  -1.3942000e-01
   3.9920000e-02
   8.4890000e-02
   1.1710000e-02
  -5.7660000e-02
  -8.7300000e-02
   6.1390000e-02
   1.8653000e-01
  -2.3347000e-01
  -1.0564000e-01
   8.0250000e-02
   2.0600000e-03
  -9.1250000e-02
   1.0943000e-01
   2.1520000e-02
  -3.2020000e-02
   7.6060000e-02
  -7.1970000e-02
   2.1250000e-02
   3.0460000e-02
   1.5980000e-02
   1.7030000e-02
  -2.9360000e-02
  -3.9150000e-02
   1.4150000e-02
   1.6450000e-02
  -5.1000000e-03
   2.5910000e-02
   2.6460000e-02
  -4.5190000e-02
   4.2880000e-02
  -4.0440000e-02
  -3.2050000e-02
   7.9000000e-03
   1.6420000e-02
  -1.4367000e-01
   9.8680000e-02
   6.3690000e-02
  -1.2371000e-01
   8.3080000e-02
  -3.2160000e-02
   9.5520000e-02
  -1.5532000e-01
   1.5974000e-01
   4.4140000e-02
  -4.7430000e-02
  -2.3110000e-02
   2.5860000e-02
   2.3390000e-02
  -4.7540000e-02
  -9.6270000e-02
   4.7760000e-02
   2.1500000e-02
  -6.0070000e-02
  -1.8700000e-02
   4.5240000e-02
   8.6100000e-03
   1.8210000e-02
  -4.5100000e-02
  -1.7660000e-02
   1.3561000e-01
   2.7200000e-02
  -9.1360000e-02
   7.6940000e-02
  -3.4850000e-02
  -5.9520000e-02
  -2.2760000e-02
   3.3500000e-03
   6.1860000e-02
  -5.5960000e-02
  -6.5690000e-02
   5.5600000e-02
  -7.0550000e-02
   1.0548000e-01
  -5.5410000e-02
   7.2960000e-02
   5.8100000e-02
  -8.1100000e-02
   2.5250000e-02
  -9.9830000e-02
   1.8810000e-02
   1.4825000e-01
   3.1000000e-03
  -8.7220000e-02
  -5.0200000e-02
   1.6470000e-01
  -1.6070000e-02
  -1.3734000e-01
   5.0310000e-02
   3.0980000e-02
  -1.0112000e-01
  -1.7580000e-02
  -8.1950000e-02
  -2.7720000e-02
   3.5260000e-02
   2.9280000e-02
  -1.6640000e-02
   1.3930000e-02
  -8.4230000e-02
   2.1770000e-02
   2.1913000e-01
  -1.0882000e-01
  -8.1400000e-02
   2.2384000e-01
  -1.0016000e-01
   8.4860000e-02
  -6.2240000e-02
  -1.4781000e-01
   1.5066000e-01
  -1.1784000e-01
   7.6520000e-02
  -5.3440000e-02
   5.7140000e-02
  -2.0120000e-02
   2.5470000e-02
  -3.5900000e-03
   6.9600000e-03
   5.9200000e-03
  -4.3680000e-02
  -2.4290000e-02
   1.1474000e-01
  -1.1529000e-01
  -2.7640000e-02
  -5.6210000e-02
   5.2120000e-02
   9.2620000e-02
   4.2880000e-02
  -7.0380000e-02
  -2.0810000e-02
   7.7650000e-02
  -9.7060000e-02
  -4.1540000e-02
  -5.2900000e-03
   6.3170000e-02
   1.1639000e-01
   1.1085000e-01
  -1.0474000e-01
  -7.4600000e-02
   1.9190000e-01
  -1.6138000e-01
  -1.4567000e-01
   5.4920000e-02
   8.3160000e-02
   3.7510000e-02
  -1.9374000e-01
   9.0510000e-02
   2.0599000e-01
  -2.1315000e-01
  -9.4700000e-02
   1.2766000e-01
   1.1540000e-02
  -1.9555000e-01
   4.1810000e-02
   6.8080000e-02
   1.4200000e-02
  -1.1373000e-01
  -4.4360000e-02
   2.2061000e-01
  -8.8750000e-02
  -1.6651000e-01
   1.6964000e-01
   5.5060000e-02
   1.6830000e-02
  -1.0775000e-01
   3.4550000e-02
   1.0679000e-01
  -5.1240000e-02
  -2.6300000e-03
  -5.4560000e-02
   0.0000000e+00
  -2.4130000e-02
  -1.1148000e-01
   3.0710000e-02
   6.9180000e-02
   9.3800000e-03
  -4.4470000e-02
  -2.1740000e-02
   8.4450000e-02
  -4.7460000e-02
   8.3160000e-02
   3.7860000e-02
   5.3110000e-02
   2.5500000e-03
   2.2920000e-02
  -5.7900000e-03
   4.2880000e-02
  -8.3300000e-02
  -8.3680000e-02
   3.4850000e-02
  -1.5130000e-02
  -1.0051000e-01
   7.5900000e-03
  -5.7500000e-02
   7.4800000e-02
   2.6810000e-02
  -5.6540000e-02
   9.4950000e-02
   2.1930000e-02
  -8.2340000e-02
   3.8170000e-02
   1.2733000e-01
   1.8600000e-03
  -1.8115000e-01
   1.1060000e-01
   1.0690000e-01
  -1.3364000e-01
  -9.7880000e-02
   2.4810000e-02
   1.1241000e-01
  -2.1874000e-01
   4.0060000e-02
   1.5944000e-01
  -1.6898000e-01
   1.5606000e-01
  -1.0455000e-01
  -2.6600000e-02
   1.1124000e-01
  -5.5110000e-02
   3.7560000e-02
  -9.9580000e-02
   1.0762000e-01
  -5.1880000e-02
  -4.7000000e-04
   8.7350000e-02
  -8.9030000e-02
   2.0620000e-02
  -5.9390000e-02
   9.5000000e-02
   4.3320000e-02
  -1.1008000e-01
  -1.0172000e-01
   1.1543000e-01
   3.8770000e-02
  -1.5617000e-01
  -4.4640000e-02
   1.0227000e-01
   9.3330000e-02
  -1.0649000e-01
  -1.5770000e-02
   6.7060000e-02
   4.9680000e-02
  -5.1130000e-02
   2.4070000e-02
   2.1400000e-03
   4.9870000e-02
  -3.3340000e-02
  -2.4350000e-02
  -8.6670000e-02
  -5.3930000e-02
  -6.0000000e-04
   5.1900000e-02
  -4.0500000e-02
   1.8640000e-02
   9.0970000e-02
   1.5570000e-02
  -1.8230000e-02
  -4.0220000e-02
  -5.9740000e-02
   7.3070000e-02
  -1.8370000e-02
  -8.0200000e-02
  -1.0910000e-01
   2.5880000e-02
   1.4356000e-01
  -8.0100000e-03
  -7.5950000e-02
   1.1727000e-01
   6.2710000e-02
  -6.9400000e-02
   4.1020000e-02
   1.4340000e-01
  -1.5088000e-01
  -1.1850000e-01
   6.8800000e-03
   6.8380000e-02
  -1.3413000e-01
   1.3700000e-03
   7.1230000e-02
  -6.8800000e-03
   5.7820000e-02
  -7.7430000e-02
   1.0940000e-01
   4.5730000e-02
  -5.4530000e-02
  -6.2270000e-02
   5.7660000e-02
   1.0560000e-02
  -6.1580000e-02
   8.9700000e-03
  -5.5400000e-03
  -1.3160000e-02
  -2.3940000e-02
   1.4477000e-01
  -4.1100000e-03
   4.8120000e-02
   1.7800000e-03
  -9.9340000e-02
   8.5130000e-02
  -5.3630000e-02
  -6.1090000e-02
   1.0674000e-01
  -4.6830000e-02
  -5.2370000e-02
  -1.2120000e-02
  -1.7660000e-02
   8.2300000e-03
  -2.6380000e-02
   6.3450000e-02
  -1.5490000e-02
  -1.2319000e-01
   9.4600000e-03
   2.0300000e-03
   2.4130000e-02
  -6.4710000e-02
  -6.4820000e-02
   5.7770000e-02
   5.0610000e-02
  -1.5980000e-02
  -3.0900000e-02
   1.2884000e-01
  -5.7800000e-02
   1.4500000e-02
  -2.5580000e-02
  -1.0139000e-01
   1.0710000e-01
  -6.5780000e-02
  -3.2080000e-02
   8.5960000e-02
   1.4810000e-02
  -7.7290000e-02
  -5.2100000e-03
   5.3440000e-02
   5.3790000e-02
  -7.9000000e-03
  -9.7800000e-02
   4.3650000e-02
   1.0762000e-01
  -4.9760000e-02
  -1.0353000e-01
  -3.4300000e-03
   1.6544000e-01
  -3.5040000e-02
  -2.9280000e-02
  -6.9750000e-02
   2.6400000e-02
   1.2420000e-02
  -7.0380000e-02
   5.7900000e-03
   1.4578000e-01
  -4.9600000e-03
  -1.6500000e-03
  -6.3580000e-02
   4.9630000e-02
   3.7230000e-02
  -8.9880000e-02
   6.9000000e-04
  -5.5270000e-02
   2.1360000e-02
  -4.8120000e-02
  -4.4940000e-02
   1.0383000e-01
  -4.4720000e-02
  -2.1584000e-01
   1.5935000e-01
   6.8680000e-02
   2.9260000e-02
  -1.1184000e-01
   1.1380000e-02
   1.8324000e-01
  -3.6930000e-02
  -7.1620000e-02
   1.2377000e-01
   2.2780000e-02
  -9.6500000e-03
  -1.9410000e-02
  -1.9930000e-02
  -1.7990000e-02
  -1.0035000e-01
  -1.0723000e-01
   1.8100000e-03
   6.1030000e-02
  -3.4520000e-02
  -9.2760000e-02
  -3.4770000e-02
   3.5560000e-02
   1.9220000e-02
  -4.5820000e-02
   7.3200000e-03
   2.4020000e-02
   1.1790000e-02
  -3.5420000e-02
   1.0493000e-01
   4.9850000e-02
  -1.0778000e-01
  -6.2680000e-02
   2.1455000e-01
  -1.2940000e-02
  -1.8210000e-02
   3.9950000e-02
   5.5850000e-02
  -1.7630000e-02
  -2.1520000e-02
   5.7280000e-02
  -1.0670000e-02
  -8.3350000e-02
   6.1690000e-02
  -2.4680000e-02
   9.5170000e-02
  -2.2151000e-01
   3.7970000e-02
   9.4430000e-02
  -2.1112000e-01
  -4.4640000e-02
  -3.2410000e-02
   3.3180000e-02
  -8.1430000e-02
   2.1390000e-02
   6.3450000e-02
  -6.0000000e-04
  -2.5200000e-02
   1.0095000e-01
  -1.4610000e-02
   5.5030000e-02
  -4.9900000e-03
   3.3010000e-02
   1.4115000e-01
  -2.1279000e-01
  -8.7500000e-03
   2.2233000e-01
  -7.9980000e-02
  -7.8470000e-02
   9.1000000e-03
   1.3070000e-01
  -1.3092000e-01
   8.7700000e-03
  -4.9900000e-03
   5.2730000e-02
   1.5710000e-02
  -8.7460000e-02
   8.2990000e-02
   5.4340000e-02
  -1.8096000e-01
  -5.8760000e-02
   2.2625000e-01
  -1.3325000e-01
  -1.0364000e-01
  -4.1760000e-02
   1.1612000e-01
  -4.5400000e-02
   6.1010000e-02
  -2.7390000e-02
   6.5800000e-03
   9.9000000e-04
  -1.0337000e-01
   9.3910000e-02
   6.5860000e-02
  -3.2820000e-02
  -5.4120000e-02
   1.6067000e-01
   1.1028000e-01
  -2.3974000e-01
  -1.6420000e-02
   2.1131000e-01
  -4.6940000e-02
  -1.0589000e-01
  -5.3680000e-02
   5.3740000e-02
   7.1070000e-02
  -1.2451000e-01
   5.7300000e-03
  -3.3180000e-02
   6.2160000e-02
   3.0210000e-02
  -1.2727000e-01
   1.0819000e-01
   7.4300000e-03
  -7.7300000e-03
  -1.0729000e-01
   6.9290000e-02
  -1.5600000e-02
  -1.3435000e-01
  -1.4370000e-02
   8.6600000e-03
   1.2785000e-01
  -5.8100000e-03
  -1.0298000e-01
   7.3100000e-02
   9.5310000e-02
  -8.7350000e-02
   9.2840000e-02
   1.3972000e-01
  -1.5584000e-01
   4.1890000e-02
   3.9500000e-03
   4.0610000e-02
  -1.4765000e-01
  -5.0700000e-03
   5.1380000e-02
  -8.9300000e-02
   6.4710000e-02
  -5.7550000e-02
   1.0948000e-01
   2.9900000e-03
  -1.6370000e-02
   2.5660000e-02
  -3.3560000e-02
   9.4670000e-02
  -1.2881000e-01
   5.2830000e-02
  -1.4590000e-02
  -5.5360000e-02
   9.3910000e-02
  -2.6840000e-02
  -1.2450000e-02
   3.3450000e-02
  -5.4640000e-02
   2.3000000e-03
   4.2110000e-02
  -2.3330000e-02
  -7.0190000e-02
  -7.2400000e-03
   5.0040000e-02
   3.9290000e-02
  -2.2840000e-02
   3.1280000e-02
  -1.0140000e-02
   8.7500000e-03
  -1.0893000e-01
   1.2585000e-01
  -7.2900000e-03
  -1.7682000e-01
   5.0340000e-02
   8.8120000e-02
   1.5880000e-02
  -8.1460000e-02
  -7.7370000e-02
   2.8840000e-02
   6.9010000e-02
  -6.6270000e-02
  -1.3430000e-02
  -3.5310000e-02
   7.0850000e-02
   4.4860000e-02
   2.1220000e-02
   1.1368000e-01
  -1.2508000e-01
   2.5960000e-02
   9.7860000e-02
   2.5500000e-02
  -7.3230000e-02
  -3.3830000e-02
   5.7440000e-02
  -1.1743000e-01
   7.0160000e-02
  -5.0450000e-02
  -4.0850000e-02
   1.5570000e-02
  -5.2000000e-04
   6.4760000e-02
  -6.1200000e-02
  -3.6900000e-02
   9.0120000e-02
   4.4720000e-02
   6.8110000e-02
  -7.1810000e-02
  -1.0164000e-01
   1.6846000e-01
  -1.5733000e-01
  -9.7100000e-03
   3.7000000e-03
   4.2250000e-02
  -1.5730000e-01
  -3.2050000e-02
   9.3960000e-02
   6.8020000e-02
   5.1190000e-02
  -2.1164000e-01
   6.0980000e-02
   1.5489000e-01
  -7.9650000e-02
  -1.7580000e-02
   2.5640000e-02
   1.5590000e-01
  -7.6030000e-02
  -4.4800000e-02
  -6.6000000e-04
   9.5550000e-02
   2.7450000e-02
  -9.9800000e-02
   7.1890000e-02
  -2.1410000e-02
  -3.8930000e-02
  -1.7347000e-01
   9.1170000e-02
   1.8480000e-02
  -4.9820000e-02
  -9.5140000e-02
   8.6530000e-02
   3.6050000e-02
  -9.7030000e-02
   2.6070000e-02
   1.2568000e-01
   9.7880000e-02
  -9.3740000e-02
  -8.1710000e-02
   1.1159000e-01
   1.5031000e-01
  -2.3676000e-01
  -4.0140000e-02
   1.2944000e-01
   1.0995000e-01
  -2.7341000e-01
  -6.5040000e-02
   1.5946000e-01
   3.3180000e-02
  -2.0873000e-01
  -7.3070000e-02
   2.2453000e-01
   2.4700000e-03
  -2.3470000e-02
  -9.4070000e-02
   1.9949000e-01
   9.6650000e-02
  -2.3777000e-01
   1.7000000e-03
   2.1351000e-01
   9.7900000e-03
  -3.0031000e-01
   3.0820000e-02
   1.5499000e-01
  -1.3709000e-01
  -6.9230000e-02
   2.9530000e-02
   5.4890000e-02
   1.1395000e-01
  -1.1340000e-01
   3.4410000e-02
   7.3650000e-02
  -7.0500000e-03
  -1.1653000e-01
   6.2000000e-03
   9.6210000e-02
  -9.9390000e-02
  -5.2940000e-02
   1.1266000e-01
  -7.1120000e-02
  -7.9760000e-02
   9.1380000e-02
   3.0410000e-02
   6.8050000e-02
  -6.5530000e-02
  -3.5840000e-02
   1.2020000e-01
   3.3200000e-02
  -7.1290000e-02
  -7.3670000e-02
   1.4822000e-01
   7.4220000e-02
  -1.3783000e-01
  -9.4950000e-02
   6.7480000e-02
   3.1060000e-02
  -1.7857000e-01
   2.6600000e-02
  -9.5470000e-02
  -6.0000000e-04
  -3.2520000e-02
   3.6470000e-02
   1.4515000e-01
  -9.8600000e-02
   9.9800000e-03
   1.7306000e-01
   5.2510000e-02
  -1.5228000e-01
  -5.2480000e-02
   1.3092000e-01
  -2.9450000e-02
  -1.6234000e-01
   1.1022000e-01
   2.9720000e-02
  -5.1000000e-02
  -2.8210000e-02
  -1.0581000e-01
   1.6325000e-01
   5.4000000e-03
  -1.5124000e-01
   1.3586000e-01
   9.8290000e-02
  -5.9800000e-03
  -1.7820000e-02
  -9.2430000e-02
   2.1932000e-01
  -4.6300000e-03
  -8.1950000e-02
   3.4000000e-02
   6.7530000e-02
  -1.8335000e-01
  -2.5550000e-02
  -4.2500000e-03
  -7.4000000e-03
  -8.9330000e-02
   9.7900000e-03
   7.9070000e-02
  -1.2985000e-01
  -2.5720000e-02
   8.9250000e-02
  -8.8150000e-02
   3.0600000e-02
   6.3580000e-02
   7.1150000e-02
  -7.8800000e-02
   1.1469000e-01
   4.1570000e-02
  -1.4940000e-01
   5.5410000e-02
   1.8210000e-02
   3.4900000e-02
  -9.2320000e-02
  -4.4970000e-02
   1.4230000e-01
  -7.5780000e-02
  -9.4130000e-02
   2.0120000e-02
   1.1184000e-01
  -6.0480000e-02
  -1.2758000e-01
  -1.9440000e-02
   8.9080000e-02
   9.2870000e-02
  -6.5560000e-02
   3.0870000e-02
   1.4540000e-01
  -6.2430000e-02
   1.0120000e-02
  -1.9360000e-02
   5.7850000e-02
  -4.1210000e-02
  -1.0463000e-01
   7.6770000e-02
  -6.6460000e-02
  -6.7700000e-03
  -1.4940000e-02
   4.1870000e-02
   3.9240000e-02
  -4.6780000e-02
   2.6840000e-02
  -2.4680000e-02
   3.8470000e-02
  -7.0880000e-02
   4.8340000e-02
  -1.9300000e-02
  -1.5604000e-01
   2.2497000e-01
  -1.3080000e-02
  -9.9340000e-02
  -2.4160000e-02
   6.3360000e-02
   8.1400000e-03
  -1.4425000e-01
   1.2552000e-01
   1.5664000e-01
  -1.8307000e-01
  -2.6680000e-02
   7.2000000e-02
   3.4680000e-02
  -8.3190000e-02
  -1.1130000e-02
   6.5280000e-02
  -4.2170000e-02
   5.1600000e-02
  -1.2401000e-01
   2.0191000e-01
   1.9000000e-04
  -2.2324000e-01
   3.5010000e-02
   1.4767000e-01
  -1.8530000e-02
  -2.2883000e-01
   9.3960000e-02
   1.0951000e-01
  -9.6050000e-02
  -8.8750000e-02
   1.1680000e-02
   1.2020000e-01
  -8.5000000e-04
  -1.3896000e-01
  -1.2261000e-01
   1.0452000e-01
   1.0704000e-01
  -6.8440000e-02
  -4.4140000e-02
   1.0954000e-01
  -9.8840000e-02
   3.2630000e-02
   1.8890000e-02
   8.4150000e-02
   8.5960000e-02
  -1.2840000e-01
   4.6750000e-02
   2.4180000e-02
   4.8170000e-02
  -1.3591000e-01
   8.7190000e-02
   1.0745000e-01
  -3.8900000e-03
  -2.8430000e-02
  -6.4710000e-02
   3.9950000e-02
  -1.1011000e-01
   1.2662000e-01
   4.4530000e-02
  -1.8738000e-01
   1.3473000e-01
  -1.1326000e-01
  -4.0960000e-02
  -2.7990000e-02
   9.2650000e-02
   3.2300000e-02
  -1.2678000e-01
   1.3597000e-01
  -8.7380000e-02
   2.1190000e-02
  -1.2248000e-01
   2.0890000e-02
   4.4170000e-02
  -2.1110000e-02
  -9.5100000e-03
   7.7320000e-02
  -7.3540000e-02
   3.8690000e-02
  -1.7123000e-01
  -1.1130000e-02
   1.5242000e-01
   2.8270000e-02
   7.4170000e-02
  -8.9470000e-02
   8.8420000e-02
   9.9690000e-02
  -1.1091000e-01
  -2.3420000e-02
   6.8270000e-02
   6.3010000e-02
  -4.7650000e-02
  -7.9980000e-02
   8.0610000e-02
  -1.0633000e-01
   4.2280000e-02
   3.9290000e-02
  -7.3120000e-02
  -1.6860000e-02
   7.3480000e-02
  -1.3710000e-02
  -7.8580000e-02
   3.3500000e-02
  -2.2210000e-02
  -2.7120000e-02
   4.2880000e-02
   6.7200000e-03
  -5.4620000e-02
  -5.3850000e-02
   2.3420000e-02
  -3.9430000e-02
  -1.5380000e-02
   1.3572000e-01
   8.6400000e-03
  -6.2950000e-02
  -4.3100000e-02
   9.5060000e-02
   3.8850000e-02
  -2.1658000e-01
  -6.5390000e-02
   1.8568000e-01
   3.1810000e-02
  -6.4380000e-02
   2.8950000e-02
   1.6670000e-01
   3.1970000e-02
  -2.0374000e-01
   3.1120000e-02
   8.3730000e-02
   2.3200000e-02
  -2.5850000e-01
   9.5030000e-02
   1.8277000e-01
  -1.9023000e-01
  -4.7710000e-02
   6.2810000e-02
   3.8660000e-02
   1.3540000e-02
  -1.5963000e-01
   1.3709000e-01
   1.7160000e-02
  -7.1700000e-02
  -4.9000000e-04
   3.7780000e-02
   5.5410000e-02
  -4.8010000e-02
  -2.8820000e-02
   5.9580000e-02
  -1.3200000e-03
  -9.6840000e-02
   1.5490000e-02
   4.4390000e-02
   1.1450000e-01
  -1.2012000e-01
   6.2800000e-03
   3.3610000e-02
  -6.6350000e-02
   6.5690000e-02
  -1.0534000e-01
  -4.4880000e-02
   1.0186000e-01
  -1.8890000e-02
  -8.2120000e-02
  -4.8230000e-02
   1.4112000e-01
  -2.7990000e-02
  -1.0383000e-01
   2.6160000e-02
   1.5861000e-01
  -3.0600000e-02
  -1.3430000e-02
   3.3040000e-02
   2.0257000e-01
  -1.1606000e-01
  -7.2050000e-02
   1.2064000e-01
  -4.6860000e-02
  -5.3360000e-02
  -1.2020000e-01
  -7.7000000e-04
   1.2525000e-01
  -5.5850000e-02
  -2.7910000e-02
  -3.8990000e-02
   3.9800000e-03
  -3.3260000e-02
   6.3310000e-02
  -5.7300000e-02
  -2.9530000e-02
  -1.0685000e-01
   6.7260000e-02
   6.5000000e-03
  -6.1940000e-02
  -3.6770000e-02
   2.2800000e-03
   1.0178000e-01
  -9.8290000e-02
   1.8780000e-02
   4.2880000e-02
  -1.0560000e-02
  -1.5160000e-02
  -5.8540000e-02
   7.2740000e-02
   1.6089000e-01
  -6.6080000e-02
  -5.7900000e-03
  -1.2280000e-02
   1.2859000e-01
  -4.8640000e-02
  -6.0370000e-02
   7.2930000e-02
   6.0650000e-02
   3.2900000e-03
  -1.1721000e-01
  -3.7100000e-02
   3.2900000e-02
  -4.2830000e-02
  -8.6260000e-02
  -3.9070000e-02
   6.0160000e-02
  -4.1430000e-02
  -2.9530000e-02
   3.5590000e-02
   3.1370000e-02
  -4.5130000e-02
   6.2240000e-02
   1.0808000e-01
  -2.9100000e-03
  -7.0300000e-02
  -4.1570000e-02
   5.3380000e-02
   8.4800000e-02
  -1.2286000e-01
  -2.7690000e-02
   2.5770000e-02
  -7.3650000e-02
  -1.7680000e-02
   8.0340000e-02
  -2.8510000e-02
  -1.0298000e-01
   9.8020000e-02
   7.4110000e-02
  -6.2430000e-02
  -9.4300000e-03
   1.1573000e-01
  -2.1000000e-02
   1.1000000e-03
   2.6300000e-03
  -6.2050000e-02
  -2.4320000e-02
   1.1900000e-02
   5.4970000e-02
  -2.1400000e-03
   1.2900000e-03
  -2.6810000e-02
  -2.3660000e-02
   3.2190000e-02
  -5.9500000e-03
  -1.0449000e-01
   2.9560000e-02
   6.1860000e-02
   8.4700000e-03
  -1.8554000e-01
   3.7300000e-03
   1.4915000e-01
  -9.8680000e-02
  -1.2089000e-01
   2.2760000e-02
   2.0980000e-01
   3.5700000e-02
  -1.2697000e-01
   1.3600000e-02
   1.0890000e-02
   5.6200000e-03
   1.5300000e-02
  -4.0580000e-02
  -1.6420000e-02
   6.7830000e-02
  -7.9380000e-02
   4.8670000e-02
  -2.2780000e-02
   5.6800000e-03
   2.9040000e-02
   1.6040000e-02
   6.1550000e-02
  -1.2340000e-02
  -4.8300000e-03
  -3.8000000e-04
  -8.2970000e-02
   5.9280000e-02
   3.8300000e-02
  -1.1055000e-01
  -3.4660000e-02
   2.0670000e-02
   8.1870000e-02
  -1.2431000e-01
  -9.1900000e-03
  -1.2420000e-02
  -3.1120000e-02
   3.7450000e-02
   1.5240000e-02
   8.0120000e-02
  -7.3200000e-03
  -3.0350000e-02
   1.2922000e-01
  -2.2870000e-02
  -1.0915000e-01
  -4.2550000e-02
   3.0870000e-02
   2.9470000e-02
  -3.4500000e-03
  -3.4710000e-02
   5.2860000e-02
  -9.4000000e-03
  -3.1120000e-02
  -2.0000000e-03
   6.6240000e-02
  -6.1400000e-03
  -1.6412000e-01
   6.6960000e-02
  -5.0530000e-02
   3.4790000e-02
  -9.1930000e-02
  -1.2072000e-01
   8.8750000e-02
   5.3200000e-03
   9.1660000e-02
  -4.1100000e-02
   4.2220000e-02
   1.4979000e-01
  -5.7470000e-02
  -3.2490000e-02
   1.9110000e-02
   7.0410000e-02
  -1.2845000e-01
   8.5460000e-02
  -5.7250000e-02
  -9.7600000e-03
   5.6540000e-02
  -1.0869000e-01
   1.6560000e-02
   1.3561000e-01
  -1.4353000e-01
  -1.0312000e-01
   9.6540000e-02
  -2.9470000e-02
  -1.2100000e-01
   5.5800000e-02
   1.2078000e-01
   1.7580000e-02
  -1.0515000e-01
   6.3090000e-02
   5.7580000e-02
  -3.8220000e-02
  -4.8720000e-02
  -2.3580000e-02
   9.4370000e-02
  -4.4940000e-02
  -2.8600000e-02
  -3.5010000e-02
   4.7100000e-02
   1.6330000e-01
  -2.0037000e-01
  -8.4780000e-02
  -8.8600000e-03
   2.0199000e-01
  -1.8370000e-01
  -3.8280000e-02
   1.4998000e-01
  -3.4220000e-02
  -1.6260000e-02
  -7.7570000e-02
  -2.2000000e-04
   1.1266000e-01
   1.0140000e-02
   4.1290000e-02
  -2.7880000e-02
  -5.3190000e-02
  -1.8950000e-02
   1.6700000e-03
   5.7720000e-02
   6.2200000e-03
  -1.4688000e-01
   7.5670000e-02
   1.6569000e-01
  -1.1241000e-01
  -1.2500000e-01
   5.0530000e-02
   1.5132000e-01
  -1.7160000e-02
  -2.0676000e-01
   2.5751000e-01
   1.2090000e-02
  -1.6511000e-01
  -5.5850000e-02
   3.4000000e-03
   9.2180000e-02
  -1.2248000e-01
   8.9250000e-02
   1.7770000e-02
  -1.0699000e-01
   6.1060000e-02
  -7.8140000e-02
  -4.8580000e-02
  -6.2800000e-03
   8.7490000e-02
  -6.0020000e-02
   3.2960000e-02
   5.1570000e-02
   5.6040000e-02
   2.9610000e-02
  -4.3760000e-02
  -2.9170000e-02
   8.6200000e-02
   1.1570000e-02
  -1.8888000e-01
   5.5710000e-02
   1.6400000e-02
  -4.8230000e-02
  -2.2370000e-02
  -2.0340000e-02
   1.9464000e-01
  -3.7260000e-02
  -2.1580000e-02
   1.4010000e-02
   6.6100000e-03
   2.9780000e-02
  -1.4989000e-01
   2.1740000e-02
   8.5000000e-02
  -1.4082000e-01
   2.4590000e-02
  -3.0430000e-02
   4.6500000e-02
  -2.4370000e-02
  -1.3906000e-01
   2.1715000e-01
  -1.1930000e-01
   6.3830000e-02
  -1.5410000e-02
  -2.7860000e-02
   1.0046000e-01
  -1.5549000e-01
   1.3410000e-01
   1.0548000e-01
  -1.8466000e-01
   2.7470000e-02
   1.1950000e-02
   7.8100000e-03
   2.8100000e-02
  -3.7590000e-02
   8.2640000e-02
  -1.6290000e-02
  -1.4518000e-01
   1.2135000e-01
   1.9520000e-02
   8.5800000e-03
   9.1300000e-02
  -8.7630000e-02
  -7.7480000e-02
   1.0830000e-02
  -1.4310000e-02
  -2.3610000e-02
  -1.3306000e-01
   1.8120000e-02
   6.5670000e-02
  -7.2190000e-02
  -3.4740000e-02
   7.3340000e-02
   3.5150000e-02
   1.8920000e-02
  -2.0780000e-02
  -6.8660000e-02
   6.3090000e-02
   7.2100000e-03
  -5.3770000e-02
   1.6500000e-03
  -3.0710000e-02
   1.0205000e-01
  -7.9950000e-02
   3.1530000e-02
   1.2845000e-01
  -4.1460000e-02
   7.3210000e-02
  -1.3251000e-01
   1.5151000e-01
   3.3200000e-03
  -2.2549000e-01
   2.1150000e-01
   6.4760000e-02
  -4.7430000e-02
  -9.6590000e-02
   4.0060000e-02
   7.5730000e-02
  -3.5970000e-02
  -2.2590000e-01
   1.4340000e-02
   1.2890000e-02
  -8.8730000e-02
  -5.0200000e-02
  -8.0880000e-02
   8.2560000e-02
   3.9980000e-02
  -4.1810000e-02
   1.2182000e-01
  -2.3200000e-02
  -2.2100000e-02
  -1.8010000e-02
   5.1930000e-02
   5.0920000e-02
   1.2420000e-02
   4.3210000e-02
  -2.0070000e-02
   2.8380000e-02
  -2.6300000e-03
  -8.0770000e-02
   1.3355000e-01
  -1.0504000e-01
  -4.0900000e-03
  -8.4700000e-03
  -5.3700000e-03
  -1.9960000e-02
   4.6640000e-02
  -5.7610000e-02
  -4.8530000e-02
   1.0795000e-01
  -3.5530000e-02
  -9.6160000e-02
   1.7153000e-01
  -3.4630000e-02
  -2.1110000e-02
  -1.7220000e-02
  -9.3030000e-02
   4.0960000e-02
  -7.5900000e-03
  -3.1610000e-02
   6.6630000e-02
  -9.6500000e-03
  -7.0270000e-02
   5.0390000e-02
   9.4350000e-02
  -1.7756000e-01
   7.6720000e-02
   1.1003000e-01
  -4.9820000e-02
  -1.6750000e-02
  -1.1831000e-01
   7.5510000e-02
   5.4950000e-02
  -4.1020000e-02
  -1.0010000e-01
   2.5750000e-02
   1.4230000e-01
  -1.1889000e-01
   4.8500000e-03
   9.8570000e-02
  -7.0710000e-02
   1.1250000e-01
  -4.5190000e-02
   7.6660000e-02
  -1.9700000e-03
  -9.6100000e-02
   1.2150000e-02
   5.9200000e-03
   6.3500000e-02
  -1.1562000e-01
  -8.7820000e-02
   4.7430000e-02
   1.2750000e-02
  -2.1559000e-01
   1.4946000e-01
  -6.5580000e-02
   9.6790000e-02
  -1.0359000e-01
  -4.9000000e-02
   1.6977000e-01
   1.0140000e-02
  -1.5143000e-01
   2.0739000e-01
   8.6810000e-02
  -5.0420000e-02
  -2.5830000e-02
  -9.0000000e-04
   2.6950000e-02
  -1.3503000e-01
   1.0830000e-01
  -8.7380000e-02
   1.6230000e-02
  -2.1440000e-02
  -5.4750000e-02
   5.4620000e-02
   2.9040000e-02
  -9.6590000e-02
   4.2390000e-02
   2.4810000e-02
  -8.1540000e-02
  -2.5330000e-02
   3.2020000e-02
   3.7840000e-02
   3.8550000e-02
  -1.5667000e-01
   1.7819000e-01
   1.1630000e-02
  -4.2740000e-02
  -1.3109000e-01
  -5.3960000e-02
   1.0923000e-01
   7.4000000e-04
  -4.3950000e-02
  -2.2730000e-02
   1.1897000e-01
  -3.2520000e-02
  -6.4730000e-02
   1.4049000e-01
   7.2440000e-02
  -3.1000000e-03
  -1.6709000e-01
   8.3950000e-02
   1.3303000e-01
  -1.8598000e-01
   1.5240000e-02
  -1.9000000e-02
   1.5460000e-02
   2.2810000e-02
  -7.1120000e-02
   7.4170000e-02
  -6.8680000e-02
   9.2400000e-03
   1.8920000e-02
   4.7630000e-02
   2.4210000e-02
  -7.6740000e-02
   3.4770000e-02
   1.0172000e-01
  -1.3361000e-01
   3.6000000e-02
   1.5135000e-01
  -1.4493000e-01
  -5.1300000e-02
  -1.4000000e-03
   1.4803000e-01
  -2.9812000e-01
   4.0580000e-02
   1.6034000e-01
  -1.5754000e-01
   2.5000000e-04
   5.8700000e-03
   5.8730000e-02
   6.9890000e-02
  -2.4180000e-02
  -2.4730000e-02
   9.4760000e-02
  -1.8620000e-02
  -1.7150000e-01
   8.7500000e-03
   1.0666000e-01
  -1.0158000e-01
   5.4370000e-02
  -9.4570000e-02
   6.8710000e-02
   1.1505000e-01
  -1.3767000e-01
   7.9590000e-02
  -3.9650000e-02
  -1.7960000e-02
   9.6000000e-03
  -3.3830000e-02
   7.1840000e-02
  -4.5240000e-02
   6.2920000e-02
   1.7380000e-02
  -1.8420000e-02
  -1.9200000e-03
   1.8480000e-02
  -5.0000000e-05
   8.1400000e-03
  -4.3180000e-02
  -7.5590000e-02
  -8.0640000e-02
   1.6975000e-01
  -5.3740000e-02
   1.5190000e-02
  -4.9600000e-02
  -4.4400000e-03
   8.6340000e-02
  -1.3731000e-01
  -4.9240000e-02
   1.4167000e-01
  -9.9010000e-02
   5.8100000e-03
   9.2230000e-02
  -2.1440000e-02
   3.3700000e-02
  -1.2097000e-01
   5.8920000e-02
   4.1840000e-02
   1.7440000e-02
  -1.0274000e-01
   3.2080000e-02
   2.4435000e-01
  -9.4430000e-02
  -1.5826000e-01
   3.8660000e-02
   6.9070000e-02
  -2.0730000e-02
  -1.3934000e-01
   5.6650000e-02
   7.0000000e-02
   9.5220000e-02
  -8.0580000e-02
  -1.0128000e-01
   1.7241000e-01
  -1.8370000e-02
  -2.3697000e-01
  -4.3650000e-02
   1.3002000e-01
  -5.5490000e-02
  -1.4883000e-01
   1.5985000e-01
   2.5550000e-02
  -2.2350000e-02
  -1.9990000e-02
  -5.2860000e-02
   1.3641000e-01
  -1.4611000e-01
   6.2200000e-03
   1.2091000e-01
   1.4720000e-02
   2.9640000e-02
  -8.7630000e-02
   2.0122000e-01
  -8.9470000e-02
  -5.6020000e-02
   2.2810000e-02
  -1.9110000e-02
   4.1570000e-02
  -1.6366000e-01
   1.4444000e-01
   2.1411000e-01
  -2.4202000e-01
   2.7990000e-02
   1.4830000e-02
   8.0600000e-03
  -1.2906000e-01
  -1.0500000e-02
   1.0120000e-01
  -6.9230000e-02
  -7.1040000e-02
   3.6770000e-02
  -1.3501000e-01
   6.4510000e-02
   7.4060000e-02
  -1.8543000e-01
   1.0965000e-01
   5.6760000e-02
  -1.0751000e-01
   8.3980000e-02
  -1.1080000e-02
   8.0470000e-02
   8.4700000e-03
  -3.4270000e-02
   1.9626000e-01
  -1.7930000e-02
  -9.2290000e-02
   6.2500000e-03
   1.9060000e-02
   1.7300000e-03
  -1.3783000e-01
   1.1490000e-02
   7.5730000e-02
   4.0440000e-02
  -2.4336000e-01
   1.7581000e-01
   1.3032000e-01
  -1.3602000e-01
   4.3430000e-02
  -8.6310000e-02
   1.0224000e-01
  -1.1387000e-01
  -2.8020000e-02
   1.0024000e-01
   1.4120000e-02
  -1.7930000e-02
  -3.4630000e-02
   2.4870000e-02
   1.4726000e-01
  -1.0784000e-01
  -6.6240000e-02
   5.4370000e-02
  -9.5100000e-03
  -6.9480000e-02
  -1.0411000e-01
   8.1900000e-02
   5.5080000e-02
  -6.8350000e-02
  -1.1063000e-01
  -6.2800000e-03
   8.6310000e-02
   7.9430000e-02
  -3.6820000e-02
   2.0370000e-02
   7.9430000e-02
  -3.0240000e-02
   2.8100000e-02
   1.6230000e-02
   7.3590000e-02
  -7.2850000e-02
  -1.5960000e-02
   8.7240000e-02
  -6.0100000e-02
  -3.4680000e-02
  -9.1800000e-02
   6.5280000e-02
  -4.0330000e-02
  -2.2260000e-02
  -6.0130000e-02
   5.3580000e-02
   6.5150000e-02
  -1.5713000e-01
   1.3330000e-02
   1.4920000e-02
  -5.8320000e-02
   1.3487000e-01
  -9.4890000e-02
   2.7340000e-02
   6.4680000e-02
  -5.9610000e-02
   2.7800000e-02
  -5.0700000e-03
  -6.0370000e-02
  -1.1350000e-02
  -8.4150000e-02
   7.8220000e-02
   1.8900000e-03
  -2.7800000e-02
   6.2810000e-02
   1.4222000e-01
  -4.8580000e-02
  -1.1060000e-01
   1.9829000e-01
  -1.1160000e-02
  -3.3700000e-03
  -1.1840000e-02
   1.6620000e-02
   2.4950000e-02
  -6.3770000e-02
  -2.6070000e-02
  -8.8600000e-03
   5.3700000e-03
  -2.7200000e-02
   1.4390000e-02
   5.1300000e-03
  -8.7080000e-02
   6.0790000e-02
   8.9360000e-02
   1.0120000e-02
  -1.7679000e-01
  -4.3130000e-02
   8.3410000e-02
   1.2270000e-01
  -1.2651000e-01
  -4.8640000e-02
   6.0650000e-02
  -1.2536000e-01
   3.0540000e-02
  -7.3070000e-02
   2.9300000e-03
   7.2820000e-02
  -4.3950000e-02
   7.6720000e-02
  -1.2245000e-01
   8.8010000e-02
   9.6730000e-02
  -6.0290000e-02
   1.0986000e-01
   1.5350000e-02
   1.3490000e-02
   6.0050000e-02
  -2.9580000e-02
   5.8730000e-02
  -8.0750000e-02
  -8.8180000e-02
   5.5000000e-04
   2.5470000e-02
  -2.2350000e-02
  -1.0323000e-01
   1.6290000e-02
   2.4050000e-02
  -2.8190000e-02
  -2.2350000e-02
  -1.7770000e-02
   8.1080000e-02
  -5.9990000e-02
  -9.2100000e-02
   2.0100000e-02
   1.0611000e-01
  -3.0600000e-02
  -1.6736000e-01
   1.6791000e-01
   1.9017000e-01
  -3.1460000e-01
   5.5330000e-02
   1.8666000e-01
  -7.3450000e-02
   1.7660000e-02
  -5.5380000e-02
   8.0970000e-02
  -7.7810000e-02
   6.9600000e-03
   3.6300000e-02
   1.2040000e-02
  -2.7770000e-02
  -3.6300000e-02
  -3.6470000e-02
   9.8400000e-03
   2.1960000e-02
  -8.1950000e-02
   1.7803000e-01
   1.8150000e-02
  -7.9350000e-02
  -7.6090000e-02
   9.6100000e-02
   7.1640000e-02
  -3.6080000e-02
  -6.8380000e-02
  -3.7800000e-03
   1.3122000e-01
  -1.0740000e-01
   6.9920000e-02
  -2.6810000e-02
  -8.8070000e-02
   2.0480000e-02
   5.7880000e-02
  -4.9020000e-02
  -1.0896000e-01
  -5.7960000e-02
   1.3635000e-01
  -9.3500000e-02
  -8.7300000e-02
   8.7440000e-02
   5.2230000e-02
   1.1472000e-01
  -5.4530000e-02
  -1.1650000e-02
   3.9070000e-02
   1.8810000e-02
  -9.8160000e-02
   6.0480000e-02
   7.7920000e-02
  -2.4350000e-02
   9.6000000e-04
  -6.2020000e-02
   1.1148000e-01
  -5.7470000e-02
  -4.8280000e-02
  -1.5410000e-02
  -2.7340000e-02
   5.2530000e-02
  -5.4260000e-02
   1.4010000e-02
   2.9310000e-02
  -2.8160000e-02
  -3.3860000e-02
   1.1411000e-01
  -4.1700000e-03
  -1.5217000e-01
   1.7336000e-01
   1.0139000e-01
  -6.5890000e-02
  -1.4904000e-01
   1.0470000e-02
   1.3665000e-01
  -1.7054000e-01
  -8.5270000e-02
   2.4900000e-02
   5.1000000e-02
   1.5030000e-02
  -8.2060000e-02
   6.4840000e-02
  -1.4890000e-02
  -9.0200000e-03
  -4.5290000e-02
   3.5010000e-02
   9.0560000e-02
  -3.1890000e-02
  -6.1500000e-02
  -1.1160000e-02
   1.1664000e-01
  -9.7200000e-02
  -2.1280000e-02
  -8.2800000e-03
   1.4153000e-01
   2.8080000e-02
  -1.3553000e-01
   5.6400000e-02
  -4.8260000e-02
   1.0438000e-01
  -1.9922000e-01
   9.1520000e-02
   2.5079000e-01
  -1.9598000e-01
  -9.1900000e-03
  -2.1330000e-02
   1.5576000e-01
  -2.0590000e-02
  -1.6983000e-01
   1.2368000e-01
  -3.9810000e-02
  -1.0965000e-01
   3.4030000e-02
  -7.5510000e-02
   7.8700000e-03
  -5.6480000e-02
   3.3090000e-02
   1.6290000e-02
   4.1130000e-02
  -3.5120000e-02
   6.6710000e-02
  -9.7100000e-03
  -2.9360000e-02
   5.3990000e-02
  -4.7520000e-02
   1.9000000e-04
   1.6670000e-02
  -1.3540000e-02
   6.4650000e-02
  -1.3130000e-02
  -1.8950000e-02
   1.0285000e-01
  -4.2420000e-02
  -2.9690000e-02
  -3.1060000e-02
   8.0010000e-02
  -1.8100000e-03
  -2.2070000e-02
  -9.1630000e-02
   9.6000000e-04
   1.2261000e-01
  -9.3720000e-02
  -3.1230000e-02
   1.1930000e-02
   3.6550000e-02
  -1.2048000e-01
  -4.6360000e-02
   1.1307000e-01
  -1.8780000e-02
  -7.8880000e-02
   1.7232000e-01
   1.3050000e-02
  -3.7320000e-02
  -5.9470000e-02
  -5.0830000e-02
   1.2322000e-01
  -3.7180000e-02
  -6.5750000e-02
   3.5950000e-02
   1.0945000e-01
  -2.0879000e-01
   7.6500000e-03
   4.9900000e-02
   4.8010000e-02
  -1.0553000e-01
  -2.3000000e-02
   4.7210000e-02
   1.2450000e-02
   4.6580000e-02
  -4.6860000e-02
   3.2380000e-02
   8.9630000e-02
  -1.2090000e-02
  -1.9550000e-02
   5.0000000e-05
  -1.7500000e-03
  -2.8800000e-03
   3.9370000e-02
  -7.7260000e-02
  -3.5810000e-02
  -5.5700000e-03
   1.2580000e-02
   1.4500000e-02
  -1.1490000e-02
  -7.9070000e-02
   1.1598000e-01
   3.1260000e-02
  -1.1540000e-02
  -6.3280000e-02
  -1.6750000e-02
   1.0975000e-01
  -1.9000000e-04
   2.7090000e-02
  -1.6684000e-01
   3.7300000e-03
   1.0858000e-01
  -1.2947000e-01
  -1.4590000e-02
   1.5609000e-01
  -5.4230000e-02
  -2.9800000e-02
  -7.7900000e-03
   7.5890000e-02
  -2.2980000e-02
  -1.5593000e-01
   3.2490000e-02
   6.7940000e-02
   2.7500000e-02
  -7.8200000e-02
   7.3210000e-02
   5.6510000e-02
  -1.7452000e-01
   5.6810000e-02
   8.0900000e-03
   1.5100000e-03
  -3.5180000e-02
  -1.0101000e-01
   1.0742000e-01
   3.9980000e-02
  -1.9490000e-02
  -4.0190000e-02
   2.6900000e-02
   2.2576000e-01
  -1.0482000e-01
  -8.4150000e-02
   1.6969000e-01
  -1.3160000e-02
  -9.5250000e-02
  -3.2490000e-02
   5.1660000e-02
  -7.6800000e-02
  -7.7430000e-02
   9.6200000e-03
  -8.4280000e-02
   3.0000000e-05
   1.9700000e-03
  -3.3010000e-02
   4.8060000e-02
  -4.4360000e-02
  -7.1010000e-02
   8.3630000e-02
   3.6000000e-02
   2.1060000e-02
   2.5000000e-03
  -7.3590000e-02
   1.5722000e-01
  -9.7300000e-03
  -8.5000000e-02
  -4.3000000e-03
  -2.0400000e-02
   3.2520000e-02
   5.2970000e-02
  -3.9620000e-02
   1.6750000e-02
   1.5650000e-01
  -8.3600000e-03
  -9.3300000e-02
  -5.1440000e-02
   1.3890000e-01
  -1.3901000e-01
  -1.2670000e-02
   8.3130000e-02
   4.6360000e-02
  -1.0487000e-01
  -1.5768000e-01
   8.4970000e-02
   2.3910000e-02
  -1.0263000e-01
  -5.6800000e-03
   1.3309000e-01
  -1.5600000e-03
   1.7710000e-02
  -5.6810000e-02
  -2.2500000e-03
   1.6010000e-02
  -7.7130000e-02
   1.0008000e-01
   4.4830000e-02
   1.6370000e-02
  -3.6270000e-02
  -1.1088000e-01
   4.0000000e-02
   8.1190000e-02
  -5.5270000e-02
  -5.3700000e-03
  -5.6970000e-02
   1.6510000e-02
   1.7676000e-01
  -1.3498000e-01
  -5.0400000e-03
   7.1640000e-02
   8.8040000e-02
  -1.2643000e-01
  -2.0670000e-02
   1.9555000e-01
  -5.0260000e-02
  -1.6440000e-01
   9.0290000e-02
  -3.9350000e-02
  -8.0100000e-03
  -6.1800000e-02
  -1.5129000e-01
   1.6045000e-01
  -7.5100000e-02
  -1.9237000e-01
   8.4200000e-02
  -3.1670000e-02
   5.9940000e-02
   5.1330000e-02
  -4.3760000e-02
   9.5440000e-02
  -1.0250000e-02
   7.3860000e-02
   8.3600000e-03
   2.5690000e-02
  -2.3770000e-02
  -5.2120000e-02
   9.8620000e-02
   1.7360000e-02
  -8.6450000e-02
   1.7300000e-03
  -1.3850000e-02
   1.2970000e-02
  -1.3671000e-01
   2.8100000e-02
   2.4430000e-02
  -2.5360000e-02
   2.8760000e-02
   1.5938000e-01
   4.5050000e-02
  -8.6920000e-02
  -4.1210000e-02
   8.9820000e-02
  -8.2500000e-03
  -8.8420000e-02
  -5.6120000e-02
  -5.3110000e-02
   2.1100000e-03
  -3.3500000e-02
  -6.3300000e-03
   9.5110000e-02
   1.2800000e-02
  -4.8420000e-02
   5.1190000e-02
  -1.8340000e-02
   1.3534000e-01
  -1.8954000e-01
   8.7270000e-02
   7.3950000e-02
  -5.7880000e-02
  -1.5680000e-02
  -6.5470000e-02
   1.7770000e-01
  -1.6692000e-01
  -9.9660000e-02
   4.3050000e-02
   9.2450000e-02
   2.2200000e-03
  -9.4210000e-02
   4.9490000e-02
  -1.5710000e-02
   1.3942000e-01
  -8.4970000e-02
   1.6670000e-02
   3.1390000e-02
   3.0130000e-02
   4.0690000e-02
  -1.4658000e-01
   2.2028000e-01
  -1.4724000e-01
  -9.1850000e-02
   5.0280000e-02
  -4.0300000e-03
   8.0300000e-03
  -9.8400000e-02
  -3.6990000e-02
   2.5470000e-02
   7.1000000e-03
  -1.1300000e-02
   3.1280000e-02
   4.5190000e-02
  -5.8900000e-03
  -1.6599000e-01
   8.6260000e-02
   1.2807000e-01
   1.2445000e-01
  -1.8154000e-01
  -1.1990000e-01
   2.2392000e-01
   4.8390000e-02
  -1.2579000e-01
  -1.0556000e-01
   8.7850000e-02
   1.6308000e-01
  -2.8649000e-01
  -3.0240000e-02
   1.8702000e-01
   1.6480000e-02
  -3.1230000e-02
  -9.1190000e-02
  -7.7460000e-02
   1.6163000e-01
   4.3210000e-02
  -1.3421000e-01
   1.2897000e-01
  -4.7570000e-02
  -6.3610000e-02
   3.5100000e-02
  -1.1400000e-01
   6.9090000e-02
   6.5360000e-02
  -3.2790000e-02
  -8.6720000e-02
   5.3250000e-02
   7.7020000e-02
  -7.3010000e-02
  -1.2170000e-02
   1.5519000e-01
  -1.6226000e-01
   3.2760000e-02
  -1.1269000e-01
   8.5080000e-02
   1.6530000e-02
  -7.5870000e-02
   1.4274000e-01
  -9.4150000e-02
   1.1980000e-02
   1.0827000e-01
   6.3560000e-02
  -9.8460000e-02
   1.0402000e-01
  -1.2401000e-01
   7.3860000e-02
  -1.1063000e-01
  -1.3430000e-02
   1.4586000e-01
  -1.9681000e-01
  -1.0200000e-02
   7.4300000e-03
   6.3450000e-02
  -9.1380000e-02
   4.6970000e-02
   1.8055000e-01
  -2.0251000e-01
   1.1954000e-01
   4.6100000e-03
   2.6900000e-03
   5.7300000e-03
  -1.3528000e-01
   1.3465000e-01
   6.5200000e-02
  -8.6530000e-02
  -1.5439000e-01
   1.2182000e-01
  -5.1570000e-02
  -2.0649000e-01
  -3.2100000e-03
   6.3060000e-02
   1.0232000e-01
  -4.2640000e-02
  -3.7840000e-02
   7.1620000e-02
   6.1310000e-02
   3.4600000e-02
  -4.3840000e-02
   1.5080000e-01
  -2.2540000e-02
  -1.8524000e-01
   3.2870000e-02
   7.1640000e-02
  -2.2480000e-02
  -8.4260000e-02
   1.1927000e-01
   1.0274000e-01
  -1.4447000e-01
   2.1190000e-02
   2.3610000e-02
  -4.4500000e-02
  -8.4170000e-02
   1.2910000e-02
  -1.0310000e-02
   9.2700000e-03
   6.5690000e-02
  -3.6160000e-02
   1.0742000e-01
   9.7600000e-03
  -1.8982000e-01
   9.2450000e-02
  -7.9680000e-02
  -1.9110000e-02
   1.5380000e-02
  -5.4260000e-02
   1.1938000e-01
  -6.2050000e-02
  -1.0652000e-01
   2.2113000e-01
  -9.1190000e-02
  -5.7080000e-02
   1.0498000e-01
   5.4180000e-02
  -5.6450000e-02
   8.8600000e-03
   1.0249000e-01
  -5.4300000e-03
  -5.0040000e-02
  -6.4380000e-02
   6.9480000e-02
   7.9500000e-03
  -1.7235000e-01
   4.3620000e-02
   3.4680000e-02
   3.5070000e-02
  -3.6550000e-02
  -1.8560000e-02
   2.7940000e-02
  -5.2420000e-02
   6.4820000e-02
  -1.0912000e-01
   1.6000000e-04
   6.5640000e-02
   6.0460000e-02
   2.4370000e-02
  -9.8620000e-02
   5.4600000e-03
   1.4189000e-01
  -1.3020000e-02
  -1.3035000e-01
   1.4480000e-02
   1.0852000e-01
  -9.6400000e-02
  -9.9800000e-02
   7.5730000e-02
   1.5680000e-02
  -8.9900000e-03
  -1.1444000e-01
   7.3150000e-02
   4.8940000e-02
  -8.9140000e-02
   3.6470000e-02
  -6.4710000e-02
   3.5700000e-02
   3.3200000e-03
  -7.2630000e-02
   7.0550000e-02
  -4.4990000e-02
   3.9590000e-02
   4.6500000e-02
  -6.9900000e-03
   6.6110000e-02
  -1.7050000e-02
   2.5910000e-02
   8.6400000e-03
  -3.5420000e-02
   8.0300000e-03
  -3.0490000e-02
   1.3200000e-03
   1.6920000e-02
   1.9440000e-02
  -4.4250000e-02
  -7.5070000e-02
   4.0280000e-02
   1.9850000e-02
   4.0850000e-02
  -3.8850000e-02
   3.1010000e-02
   8.4420000e-02
  -7.0190000e-02
   4.7410000e-02
  -4.7710000e-02
  -1.7300000e-02
  -5.3820000e-02
  -5.7080000e-02
   1.6086000e-01
  -7.0380000e-02
   3.6990000e-02
  -2.8460000e-02
  -4.4010000e-02
   9.2780000e-02
   5.0500000e-02
   2.6350000e-02
  -8.1320000e-02
  -3.3780000e-02
   6.9670000e-02
  -2.6400000e-02
  -8.7500000e-03
   1.6700000e-03
  -1.9850000e-02
  -1.2300000e-03
  -1.5335000e-01
  -1.1240000e-02
   2.1137000e-01
  -7.6580000e-02
  -9.8160000e-02
  -7.5100000e-03
   1.2100000e-01
   3.5860000e-02
  -9.7170000e-02
   1.5357000e-01
  -5.8900000e-03
  -3.8440000e-02
   6.5500000e-03
  -1.2500000e-02
   9.0510000e-02
  -1.3887000e-01
  -9.8900000e-02
   1.1801000e-01
   1.3602000e-01
  -1.1247000e-01
  -2.1222000e-01
   9.0840000e-02
   7.2690000e-02
  -1.2344000e-01
  -1.9080000e-02
   1.2371000e-01
   5.5410000e-02
  -2.6980000e-02
  -1.3789000e-01
   1.0413000e-01
   1.6848000e-01
  -1.0781000e-01
  -7.2800000e-02
  -4.5240000e-02
   7.7020000e-02
  -1.3961000e-01
   1.3600000e-02
   1.1148000e-01
  -7.8310000e-02
   3.4520000e-02
  -3.1810000e-02
   9.0530000e-02
   1.6695000e-01
  -2.3037000e-01
  -1.8860000e-02
   8.3130000e-02
   4.8310000e-02
  -6.0370000e-02
   2.2200000e-03
  -4.1130000e-02
  -5.4430000e-02
   5.8370000e-02
  -7.5260000e-02
   4.2060000e-02
   8.2000000e-04
   5.0150000e-02
  -2.6380000e-02
  -3.2190000e-02
   3.4440000e-02
   7.3730000e-02
  -1.2525000e-01
  -1.4000000e-04
  -1.1240000e-02
   5.5060000e-02
   5.6260000e-02
   1.6780000e-02
   2.0040000e-02
  -8.6700000e-02
   9.4300000e-03
   7.1640000e-02
  -9.6370000e-02
  -5.7720000e-02
   6.1030000e-02
   4.7540000e-02
   9.6810000e-02
  -1.4252000e-01
   4.0830000e-02
  -2.7100000e-03
   6.3230000e-02
   1.7110000e-02
  -7.6910000e-02
  -5.3490000e-02
   1.2830000e-02
   1.2185000e-01
   4.3270000e-02
  -1.5319000e-01
   4.6830000e-02
   5.1080000e-02
   2.4700000e-02
  -2.2460000e-02
  -1.6454000e-01
   1.9563000e-01
  -3.7860000e-02
  -1.5151000e-01
   5.2860000e-02
   4.2500000e-02
   1.9770000e-02
  -1.2947000e-01
   8.7050000e-02
   9.3770000e-02
  -7.1670000e-02
  -4.9630000e-02
   3.6630000e-02
   1.4214000e-01
  -2.7843000e-01
   4.0060000e-02
   7.4300000e-02
  -1.0926000e-01
   1.6590000e-02
  -9.7280000e-02
   2.3503000e-01
   3.8600000e-02
  -1.0896000e-01
   1.2750000e-02
   2.5550000e-02
   9.3360000e-02
  -2.2869000e-01
   2.1030000e-02
   1.5261000e-01
  -9.1140000e-02
  -2.6210000e-02
  -1.3857000e-01
   2.0204000e-01
  -1.0238000e-01
  -2.3500000e-02
   2.7770000e-02
   2.6100000e-02
   1.0257000e-01
  -5.7220000e-02
   5.1520000e-02
   5.8100000e-02
  -7.0110000e-02
  -4.0880000e-02
   8.2000000e-03
   6.7010000e-02
  -1.1211000e-01
  -1.6560000e-02
   1.6045000e-01
  -9.5200000e-02
   1.3960000e-02
  -7.5700000e-02
   8.6390000e-02
  -5.4750000e-02
  -9.2400000e-02
   1.1230000e-01
  -5.9520000e-02
   1.5861000e-01
  -1.5963000e-01
   7.4660000e-02
   3.1200000e-02
  -2.5800000e-03
   3.8850000e-02
  -4.7300000e-02
  -6.2290000e-02
   3.2490000e-02
   9.7100000e-03
   5.0810000e-02
  -2.2950000e-02
  -5.9090000e-02
  -7.0740000e-02
   9.9660000e-02
  -4.1900000e-03
  -2.2716000e-01
   2.3341000e-01
  -2.5500000e-03
  -4.1900000e-03
   2.6070000e-02
  -1.8260000e-02
   1.0060000e-02
  -4.4800000e-02
   6.3660000e-02
  -9.1770000e-02
  -6.3900000e-03
  -3.0570000e-02
  -4.1150000e-02
   3.6030000e-02
   2.1770000e-02
   3.4770000e-02
  -5.6650000e-02
  -1.6940000e-02
   1.4663000e-01
  -2.8080000e-02
  -2.1170000e-02
   9.7600000e-03
  -2.7720000e-02
   9.7600000e-03
  -1.6450000e-02
   3.5840000e-02
   1.0863000e-01
  -9.4480000e-02
  -6.6270000e-02
   7.7890000e-02
   6.2680000e-02
  -1.8962000e-01
  -3.5670000e-02
   8.8830000e-02
   1.0841000e-01
  -1.7830000e-01
   5.4430000e-02
   1.6385000e-01
  -1.2253000e-01
   1.5930000e-02
  -9.5630000e-02
   8.0900000e-03
   2.1280000e-02
  -1.5009000e-01
  -1.1900000e-02
   6.8800000e-03
   5.8210000e-02
  -2.0320000e-02
  -5.6560000e-02
   5.5170000e-02
   9.5660000e-02
  -1.6400000e-02
  -4.0830000e-02
   3.2130000e-02
  -1.7140000e-02
  -4.8010000e-02
   1.0279000e-01
   1.7520000e-02
  -6.1140000e-02
   4.7130000e-02
  -8.3210000e-02
   1.2352000e-01
   5.3900000e-02
  -1.2363000e-01
   1.1039000e-01
  -7.8090000e-02
  -2.5140000e-02
  -5.2890000e-02
   1.1784000e-01
  -1.4403000e-01
  -7.1640000e-02
   1.3879000e-01
  -3.6140000e-02
   1.0420000e-02
  -4.0410000e-02
   1.4280000e-02
   6.4570000e-02
   1.0328000e-01
  -9.1380000e-02
  -7.0700000e-03
   8.9270000e-02
   2.8430000e-02
  -2.7580000e-02
  -2.9610000e-02
  -7.6520000e-02
  -2.9890000e-02
   7.7900000e-03
  -2.6710000e-02
  -3.1810000e-02
  -4.3900000e-02
  -6.1990000e-02
   1.1675000e-01
   2.2920000e-02
  -6.7780000e-02
   2.8320000e-02
   1.1943000e-01
   8.9220000e-02
  -1.1677000e-01
  -1.4590000e-02
   1.5601000e-01
  -1.8040000e-02
  -1.2930000e-01
  -2.9940000e-02
   1.1346000e-01
   8.3900000e-03
  -2.2102000e-01
   8.8340000e-02
   1.4976000e-01
  -6.0790000e-02
  -1.7701000e-01
   7.0000000e-02
   8.8230000e-02
  -1.4696000e-01
   8.5800000e-03
   3.1150000e-02
   2.7580000e-02
   2.6620000e-02
  -3.0650000e-02
  -8.8590000e-02
   9.0200000e-03
   5.4010000e-02
  -3.8110000e-02
   7.2100000e-03
   3.1340000e-02
  -3.6850000e-02
   1.1820000e-02
  -3.8100000e-03
   5.2400000e-03
  -8.4970000e-02
   2.1998000e-01
   2.0000000e-03
  -1.1998000e-01
  -9.9000000e-04
   7.5400000e-03
   3.0210000e-02
   1.5000000e-02
  -4.8450000e-02
  -6.6410000e-02
   1.2218000e-01
  -3.9070000e-02
  -5.9170000e-02
  -9.4000000e-03
   1.4194000e-01
  -9.9770000e-02
   1.1190000e-02
  -3.9400000e-02
   5.9660000e-02
   5.4600000e-03
   3.3810000e-02
   4.9000000e-04
  -3.0050000e-02
   3.5200000e-02
  -1.6418000e-01
   1.8197000e-01
  -9.1270000e-02
  -6.4950000e-02
   4.8010000e-02
  -7.8060000e-02
   3.2300000e-02
  -9.6950000e-02
   8.5710000e-02
   9.4870000e-02
  -1.7147000e-01
   1.1592000e-01
   4.0470000e-02
  -1.3110000e-02
  -3.8740000e-02
   6.7530000e-02
   7.9210000e-02
  -9.5740000e-02
   3.4790000e-02
   1.5710000e-02
   2.3660000e-02
  -2.8160000e-02
  -5.2510000e-02
   3.7560000e-02
  -2.5500000e-02
   6.4510000e-02
  -6.1690000e-02
  -2.6290000e-02
   1.1650000e-02
  -4.5160000e-02
   1.3110000e-02
  -2.0340000e-02
   4.6230000e-02
  -1.1030000e-01
   4.3870000e-02
  -3.6250000e-02
  -2.3900000e-03
   1.9630000e-02
  -8.5790000e-02
   1.2823000e-01
   7.7900000e-03
   1.9850000e-02
   5.4400000e-02
  -9.2180000e-02
  -3.5100000e-03
   4.5800000e-03
  -1.1130000e-02
   5.2420000e-02
  -1.3227000e-01
   1.0479000e-01
  -5.4920000e-02
   6.9590000e-02
   2.1792000e-01
  -1.3972000e-01
   8.5080000e-02
  -4.0060000e-02
  -5.7110000e-02
   6.0650000e-02
  -1.4501000e-01
  -2.9090000e-02
   2.2620000e-02
   4.6300000e-03
   4.3920000e-02
  -6.0790000e-02
  -3.0630000e-02
   5.4530000e-02
   9.8700000e-03
  -1.9204000e-01
   1.3492000e-01
  -2.7390000e-02
   1.0062000e-01
  -1.1932000e-01
  -4.4090000e-02
   1.4049000e-01
   6.3770000e-02
  -4.5870000e-02
  -1.1630000e-02
   4.7100000e-02
   4.8720000e-02
  -1.4957000e-01
  -7.2770000e-02
   9.2040000e-02
   2.9040000e-02
  -2.0210000e-01
   8.2890000e-02
   2.0303000e-01
  -2.9670000e-02
  -2.8570000e-01
   1.8855000e-01
   1.3076000e-01
  -1.5872000e-01
  -5.0940000e-02
  -9.9010000e-02
   3.1150000e-01
  -1.1913000e-01
  -2.3250000e-02
   3.0960000e-02
   5.0500000e-02
  -3.7800000e-03
  -1.3665000e-01
   1.4049000e-01
   5.9610000e-02
  -2.3311000e-01
   1.2653000e-01
   2.2920000e-02
  -4.0690000e-02
  -1.3695000e-01
   1.2514000e-01
   1.2034000e-01
  -1.3002000e-01
   9.4650000e-02
  -4.0440000e-02
   1.2906000e-01
  -3.7540000e-02
  -2.0706000e-01
   1.4238000e-01
  -5.6480000e-02
  -4.5680000e-02
  -2.4050000e-02
   4.3180000e-02
   2.2870000e-02
  -7.9900000e-02
   6.3300000e-03
  -1.7900000e-02
   7.9840000e-02
  -1.1270000e-02
  -1.3646000e-01
   6.1800000e-02
   1.2692000e-01
  -1.1307000e-01
  -2.2180000e-02
   2.9610000e-02
   5.4860000e-02
  -6.5040000e-02
  -2.4320000e-02
   1.4093000e-01
  -3.5530000e-02
  -5.4670000e-02
   1.1181000e-01
   6.4730000e-02
  -9.3630000e-02
  -1.1642000e-01
   1.7190000e-02
   2.0906000e-01
  -1.2733000e-01
  -2.7860000e-02
   5.9630000e-02
  -8.7000000e-02
  -2.3200000e-02
  -8.9380000e-02
   8.8620000e-02
   4.4640000e-02
  -3.3500000e-02
   3.2630000e-02
  -3.6030000e-02
   1.6230000e-02
  -2.3940000e-02
   1.4480000e-02
   1.1210000e-02
   3.1700000e-02
   9.5100000e-03
  -4.3400000e-02
   2.0174000e-01
  -8.4860000e-02
  -1.3879000e-01
   5.6760000e-02
   5.0150000e-02
  -4.1680000e-02
  -6.2130000e-02
   8.9790000e-02
   1.9000000e-02
  -8.4750000e-02
  -5.4640000e-02
   9.3880000e-02
   9.9000000e-04
  -9.8810000e-02
   1.8970000e-02
   5.1600000e-02
  -5.4070000e-02
   2.8540000e-02
  -8.9360000e-02
   6.7420000e-02
   2.0100000e-02
   4.5020000e-02
   2.1390000e-02
  -5.5910000e-02
   4.7630000e-02
  -4.9930000e-02
  -2.4700000e-03
   5.3030000e-02
  -1.0880000e-01
   1.5793000e-01
  -6.2200000e-03
  -8.6890000e-02
  -4.1460000e-02
  -3.1370000e-02
   1.2226000e-01
  -1.8820000e-01
   5.3990000e-02
   2.1216000e-01
  -1.4584000e-01
  -2.3720000e-02
   3.2760000e-02
   1.4098000e-01
   3.0630000e-02
  -2.3097000e-01
   1.3588000e-01
  -2.2590000e-02
   9.6320000e-02
  -1.6769000e-01
  -8.6780000e-02
   9.9200000e-02
  -3.9650000e-02
   6.9310000e-02
  -9.1550000e-02
   1.4414000e-01
  -7.0250000e-02
   1.4480000e-02
   2.1190000e-02
   5.6020000e-02
   2.3880000e-02
  -1.1129000e-01
  -5.5400000e-03
   5.8460000e-02
   1.6138000e-01
  -1.4586000e-01
  -4.3070000e-02
   2.0920000e-02
  -7.6800000e-03
  -6.8440000e-02
  -1.4225000e-01
   1.5850000e-01
  -3.2960000e-02
   2.4100000e-02
   1.5460000e-02
  -1.9700000e-03
   4.5540000e-02
  -2.4810000e-02
  -1.1870000e-02
  -2.5250000e-02
   1.4280000e-02
  -4.0220000e-02
   4.7020000e-02
   1.6358000e-01
  -6.7910000e-02
  -9.3190000e-02
  -8.6940000e-02
   9.0950000e-02
  -1.2040000e-02
  -1.7413000e-01
   4.0190000e-02
   1.0427000e-01
  -1.6196000e-01
  -6.1420000e-02
   1.4266000e-01
   7.3650000e-02
   2.4980000e-02
  -6.7940000e-02
   2.2132000e-01
   1.5864000e-01
  -1.3487000e-01
   9.9800000e-03
   4.4530000e-02
   3.7620000e-02
  -1.1104000e-01
  -3.3500000e-03
   5.1160000e-02
  -1.6640000e-02
  -1.4860000e-02
   7.1040000e-02
  -7.3230000e-02
  -1.1990000e-01
  -7.8740000e-02
   1.0424000e-01
  -4.0630000e-02
  -4.2030000e-02
  -8.3900000e-03
   5.7930000e-02
  -4.2200000e-03
  -7.1670000e-02
   8.4390000e-02
  -6.5910000e-02
   2.5800000e-03
   2.0430000e-02
  -1.4700000e-02
  -2.2760000e-02
  -1.1313000e-01
   4.8200000e-02
  -6.0100000e-02
   6.1330000e-02
  -2.8820000e-02
   2.0100000e-02
   2.1115000e-01
   5.5100000e-03
  -8.1080000e-02
   1.8222000e-01
   1.3110000e-02
  -7.9460000e-02
  -1.3270000e-02
   3.0410000e-02
   8.3490000e-02
  -1.8888000e-01
  -3.5040000e-02
   1.1710000e-02
  -1.0420000e-02
   6.6650000e-02
  -2.4627000e-01
   1.2771000e-01
   1.5330000e-02
  -7.0000000e-02
   5.0450000e-02
  -6.6630000e-02
   6.7170000e-02
   3.4300000e-03
   5.4290000e-02
  -5.1300000e-03
  -3.8250000e-02
  -4.8800000e-02
   1.5770000e-02
   4.9000000e-02
  -6.6570000e-02
  -2.9580000e-02
   8.9990000e-02
   1.1099000e-01
  -1.4720000e-02
  -9.9010000e-02
   1.5782000e-01
  -1.0274000e-01
   1.2560000e-02
  -3.9480000e-02
  -5.6430000e-02
   2.1562000e-01
  -1.0945000e-01
  -5.6510000e-02
   6.4100000e-02
   3.1780000e-02
  -3.1700000e-02
  -1.6480000e-02
  -5.8000000e-04
  -6.7810000e-02
   8.9400000e-03
   5.7610000e-02
  -4.0800000e-02
  -4.9000000e-04
  -1.7500000e-03
  -2.0260000e-02
   6.5640000e-02
   8.2000000e-04
  -1.6510000e-02
  -5.3030000e-02
   5.4600000e-03
   7.7180000e-02
  -2.2066000e-01
   1.5214000e-01
   5.3550000e-02
  -5.2640000e-02
   7.1510000e-02
  -1.2941000e-01
   1.5579000e-01
   6.0600000e-03
  -2.2211000e-01
   2.8710000e-02
   1.1107000e-01
   6.3060000e-02
  -1.5570000e-02
  -1.2873000e-01
   1.4466000e-01
   9.0730000e-02
  -1.4016000e-01
   2.1330000e-02
   1.0622000e-01
  -1.3632000e-01
  -4.1150000e-02
  -3.4960000e-02
   7.7700000e-02
  -8.2580000e-02
  -2.7940000e-02
   3.5670000e-02
   1.1870000e-02
   6.6350000e-02
  -7.1310000e-02
   7.4190000e-02
   9.1630000e-02
  -1.1889000e-01
   1.2319000e-01
   2.2180000e-02
  -7.5130000e-02
  -3.7450000e-02
  -8.0090000e-02
   1.1346000e-01
  -3.0520000e-02
  -9.0970000e-02
   1.9600000e-02
   5.7740000e-02
  -7.2700000e-03
  -1.2684000e-01
   1.2357000e-01
   2.8380000e-02
  -6.0270000e-02
  -2.6840000e-02
  -5.9250000e-02
   1.4241000e-01
  -1.3000000e-02
   2.2200000e-03
  -4.9600000e-03
   4.3900000e-03
   8.0420000e-02
  -9.5990000e-02
   3.6700000e-03
   3.3000000e-04
  -5.2510000e-02
  -3.2570000e-02
   1.0468000e-01
   8.6260000e-02
  -1.5988000e-01
   5.6810000e-02
   6.6240000e-02
  -1.9060000e-02
   9.0480000e-02
  -1.5099000e-01
   9.6210000e-02
   8.8090000e-02
  -3.3255000e-01
   1.8559000e-01
  -5.7390000e-02
  -8.2910000e-02
   1.0640000e-02
  -1.0191000e-01
   1.3857000e-01
  -5.5660000e-02
  -1.4230000e-02
   6.6850000e-02
   5.4430000e-02
   1.5960000e-02
  -9.9800000e-03
   1.5935000e-01
  -1.2100000e-03
  -3.4770000e-02
  -1.1480000e-01
   1.3820000e-02
   9.7300000e-03
  -1.1313000e-01
  -2.9470000e-02
  -4.6090000e-02
   1.3726000e-01
  -5.0200000e-03
  -1.1559000e-01
   1.3854000e-01
   8.2420000e-02
   1.2310000e-02
  -2.2351000e-01
   1.0411000e-01
   2.1660000e-01
  -1.5398000e-01
  -5.7390000e-02
   7.5920000e-02
   1.2322000e-01
  -9.1710000e-02
  -1.9198000e-01
   8.5240000e-02
  -3.8900000e-03
  -1.0334000e-01
  -5.6210000e-02
   2.6210000e-02
  -5.0000000e-05
   1.4780000e-02
  -9.8240000e-02
   8.2390000e-02
   1.2366000e-01
  -3.3810000e-02
  -4.1370000e-02
   1.6051000e-01
   5.0700000e-03
  -1.2590000e-01
   4.3950000e-02
   1.1793000e-01
  -1.7213000e-01
   8.6560000e-02
  -9.3360000e-02
   2.5250000e-02
  -1.0420000e-02
  -5.7500000e-02
   1.6119000e-01
  -9.3360000e-02
  -2.5660000e-02
  -2.7770000e-02
   5.8480000e-02
  -1.9140000e-02
  -2.3940000e-02
   1.7820000e-02
  -8.4420000e-02
   7.2740000e-02
  -5.3110000e-02
  -5.2100000e-03
   1.0655000e-01
  -3.7260000e-02
  -7.0700000e-03
  -5.2510000e-02
   2.6180000e-02
   1.3407000e-01
  -1.0660000e-01
   2.7060000e-02
   1.1900000e-02
   4.0550000e-02
  -2.4100000e-03
  -5.8670000e-02
   1.3650000e-02
   6.0540000e-02
  -1.0970000e-01
  -9.3200000e-03
   3.8930000e-02
  -2.9640000e-02
   6.0760000e-02
   1.1100000e-02
  -8.5430000e-02
   6.8350000e-02
  -4.1100000e-03
  -1.0748000e-01
   6.5120000e-02
   2.1550000e-02
   5.1820000e-02
  -1.3525000e-01
  -9.0450000e-02
   1.1784000e-01
   7.5100000e-03
  -1.0641000e-01
   1.0500000e-02
   1.7570000e-01
  -1.5340000e-01
   1.1600000e-02
   2.8380000e-02
   8.2000000e-03
   4.1870000e-02
  -5.4010000e-02
   7.4110000e-02
   7.3950000e-02
  -8.0390000e-02
  -3.6880000e-02
  -5.7900000e-03
   5.4480000e-02
   1.6950000e-01
  -2.9647000e-01
  -2.2570000e-02
   1.2848000e-01
  -7.4000000e-04
  -7.2740000e-02
  -1.0701000e-01
   3.7010000e-02
   6.4730000e-02
  -5.9330000e-02
  -9.6350000e-02
   7.3650000e-02
   7.0140000e-02
  -4.8720000e-02
   5.9990000e-02
   5.2670000e-02
  -3.4080000e-02
   5.9660000e-02
  -1.1784000e-01
   1.3775000e-01
   2.9310000e-02
  -1.8674000e-01
   1.2793000e-01
  -4.8120000e-02
   1.3000000e-02
  -2.1220000e-02
  -1.0808000e-01
  -4.3000000e-03
   1.9380000e-02
  -7.5210000e-02
  -6.4320000e-02
   1.1307000e-01
  -1.5790000e-02
   1.6450000e-02
   5.8210000e-02
  -2.0100000e-02
   2.4320000e-02
   7.1260000e-02
  -3.5010000e-02
  -7.9210000e-02
   8.6100000e-03
   5.8950000e-02
   5.7900000e-03
  -4.6060000e-02
  -3.2300000e-02
   1.3292000e-01
  -3.9650000e-02
  -9.2120000e-02
  -1.8320000e-02
   5.1740000e-02
  -1.0250000e-02
  -1.0635000e-01
   7.0160000e-02
   2.7090000e-02
   6.4320000e-02
  -7.8610000e-02
  -4.4000000e-04
   2.1910000e-02
  -1.3980000e-02
   7.7650000e-02
  -4.8500000e-02
   5.0150000e-02
  -6.5580000e-02
  -4.4860000e-02
   1.8058000e-01
  -2.1610000e-02
  -1.3191000e-01
   3.9920000e-02
  -8.0300000e-03
   4.2200000e-03
  -7.9590000e-02
   1.1050000e-02
   5.6480000e-02
  -3.0790000e-02
   7.7480000e-02
  -7.3150000e-02
  -7.0990000e-02
   1.1332000e-01
   4.4340000e-02
  -1.4397000e-01
  -7.0490000e-02
   1.3054000e-01
   1.1380000e-02
  -7.6580000e-02
  -5.4010000e-02
   4.0360000e-02
   6.4490000e-02
  -1.3695000e-01
  -1.6230000e-02
   1.9409000e-01
  -3.0130000e-02
  -1.6772000e-01
   2.4730000e-02
   1.4493000e-01
  -1.2281000e-01
   1.5460000e-02
  -8.2000000e-04
  -1.5900000e-02
   6.1640000e-02
  -6.2920000e-02
  -5.7770000e-02
   3.0490000e-02
   1.2503000e-01
  -3.8930000e-02
  -3.3750000e-02
   9.9420000e-02
  -8.8890000e-02
  -2.7360000e-02
   4.1790000e-02
   9.3520000e-02
  -1.0005000e-01
  -1.0627000e-01
   1.0087000e-01
   3.9290000e-02
  -3.3780000e-02
  -1.1299000e-01
   2.7990000e-02
   6.3610000e-02
  -7.2270000e-02
  -7.8400000e-03
   2.0370000e-02
  -2.1190000e-02
   4.5600000e-02
  -1.9500000e-03
   3.3500000e-02
   1.7805000e-01
  -6.4950000e-02
  -4.7430000e-02
   9.9610000e-02
  -5.0400000e-03
  -8.7520000e-02
  -3.0900000e-02
  -6.5170000e-02
  -5.2200000e-02
  -4.7270000e-02
   2.7170000e-02
   3.8600000e-02
  -9.3440000e-02
   9.8180000e-02
   1.3430000e-02
   4.7680000e-02
   1.0890000e-02
  -1.5900000e-03
   6.8930000e-02
  -2.8350000e-02
  -8.6560000e-02
  -1.7680000e-02
   4.0690000e-02
   6.6300000e-02
  -5.4950000e-02
  -5.0530000e-02
  -3.0200000e-03
  -7.1920000e-02
   5.7190000e-02
  -1.1757000e-01
   1.0896000e-01
  -8.6890000e-02
  -3.3120000e-02
   1.2272000e-01
  -2.1550000e-02
   2.9720000e-02
  -2.6730000e-02
  -6.1700000e-03
   1.4894000e-01
  -1.4337000e-01
  -3.3970000e-02
   1.7043000e-01
  -3.0160000e-02
   4.5020000e-02
  -1.6854000e-01
   1.3476000e-01
   1.2289000e-01
  -2.7292000e-01
  -3.7840000e-02
   1.1220000e-01
   6.9450000e-02
  -2.0405000e-01
  -7.7680000e-02
   1.5993000e-01
   5.4120000e-02
  -8.3820000e-02
  -3.6440000e-02
   4.5400000e-02
   6.5890000e-02
  -4.7460000e-02
  -1.6810000e-02
  -2.0540000e-02
   4.9400000e-03
  -1.5680000e-02
   3.6600000e-02
  -3.3000000e-04
  -2.8210000e-02
   2.8620000e-02
  -8.2200000e-02
   3.6550000e-02
  -6.2950000e-02
  -7.5100000e-03
   1.2048000e-01
  -3.2410000e-02
  -9.0000000e-04
  -9.8900000e-02
   1.5127000e-01
   1.1428000e-01
  -1.6772000e-01
   5.7440000e-02
   9.0950000e-02
  -5.6560000e-02
  -6.8220000e-02
  -5.3770000e-02
  -2.5500000e-02
   3.0000000e-05
  -4.2470000e-02
  -1.4030000e-01
  -4.1700000e-02
   2.5565000e-01
  -9.6370000e-02
   5.5550000e-02
   9.0340000e-02
   2.3580000e-02
  -1.5000000e-02
  -7.3730000e-02
  -2.7530000e-02
   6.4820000e-02
   2.9170000e-02
  -4.9430000e-02
   6.1640000e-02
  -2.3440000e-02
  -5.3250000e-02
   1.7770000e-02
   2.5830000e-02
  -6.5170000e-02
   1.1540000e-02
   5.2340000e-02
  -2.6130000e-02
  -7.9290000e-02
   4.8200000e-02
  -3.3370000e-02
  -2.8600000e-02
   1.0753000e-01
   2.4480000e-02
  -1.3900000e-02
   5.5300000e-02
   1.8600000e-03
   5.6150000e-02
  -8.5960000e-02
  -1.1878000e-01
   2.4480000e-02
  -1.0095000e-01
  -1.6310000e-02
  -2.1030000e-02
  -3.9290000e-02
   7.1040000e-02
   2.0760000e-02
   4.1590000e-02
  -3.1860000e-02
   1.1697000e-01
  -1.4150000e-02
  -8.5190000e-02
   6.1390000e-02
  -1.0890000e-02
   7.5900000e-03
  -1.0213000e-01
   8.9270000e-02
   1.4750000e-02
  -1.0882000e-01
  -2.5830000e-02
   3.9510000e-02
   8.8530000e-02
  -6.1400000e-03
  -1.5228000e-01
   8.8340000e-02
   1.1713000e-01
  -9.6730000e-02
  -7.0250000e-02
   2.7100000e-03
   7.9650000e-02
   1.1730000e-02
  -1.4397000e-01
   2.4898000e-01
  -4.1510000e-02
  -8.9490000e-02
   1.3942000e-01
  -2.0840000e-02
  -2.2400000e-02
  -2.1990000e-02
  -1.5440000e-02
  -6.1700000e-03
  -4.5790000e-02
   5.4290000e-02
  -9.1250000e-02
   1.3835000e-01
  -8.3300000e-02
  -7.7570000e-02
   1.2777000e-01
  -2.9670000e-02
   4.5000000e-03
  -3.2900000e-02
  -1.4610000e-02
   6.3800000e-02
  -1.3430000e-02
  -4.9430000e-02
  -4.0090000e-02
  -7.6500000e-03
   3.4680000e-02
   6.1100000e-03
  -5.4510000e-02
   1.0814000e-01
  -5.9280000e-02
   4.5760000e-02
   3.8800000e-02
  -3.0000000e-02
   3.1230000e-02
  -1.1650000e-02
  -1.0926000e-01
   2.9040000e-02
  -5.4340000e-02
   1.2015000e-01
  -5.1570000e-02
  -9.3330000e-02
   7.5450000e-02
  -6.8500000e-03
  -1.0254000e-01
  -3.7600000e-03
   2.2780000e-02
   4.9790000e-02
  -5.5770000e-02
   1.1974000e-01
   1.1411000e-01
  -1.9826000e-01
   1.0688000e-01
  -3.0630000e-02
  -3.0000000e-05
  -1.8180000e-02
  -6.0590000e-02
   2.1930000e-02
  -1.0542000e-01
   4.9960000e-02
   1.7300000e-02
  -1.9740000e-02
  -7.2740000e-02
   5.9610000e-02
   3.0320000e-02
   9.0500000e-03
   4.0110000e-02
   5.2000000e-04
  -5.8840000e-02
   8.7740000e-02
   6.7700000e-03
   8.3730000e-02
  -3.1500000e-03
  -9.0640000e-02
   9.1170000e-02
  -3.6500000e-03
  -4.9000000e-02
  -5.5220000e-02
  -2.2730000e-02
   1.6260000e-02
   2.1720000e-02
  -8.4780000e-02
  -1.4150000e-02
   1.6064000e-01
  -5.7030000e-02
   9.3200000e-03
  -5.8460000e-02
   7.4110000e-02
  -1.2796000e-01
  -3.8850000e-02
   3.9150000e-02
  -2.3880000e-02
  -6.0300000e-03
   1.7050000e-02
   6.2540000e-02
  -2.2590000e-02
  -3.7650000e-02
  -2.7580000e-02
   3.9700000e-02
  -4.7980000e-02
  -1.0348000e-01
  -1.2170000e-02
   8.4150000e-02
  -6.0160000e-02
   2.1900000e-03
   1.1261000e-01
   8.5650000e-02
  -1.3728000e-01
   2.6840000e-02
   2.0742000e-01
  -1.5924000e-01
   2.9800000e-02
  -5.4780000e-02
   1.0071000e-01
  -7.7210000e-02
  -4.7050000e-02
   2.9800000e-02
  -1.1790000e-02
   1.1932000e-01
  -1.9176000e-01
   9.0120000e-02
   6.2510000e-02
  -1.2303000e-01
   1.0542000e-01
  -2.0410000e-01
   9.5100000e-03
   1.2796000e-01
  -4.1210000e-02
   2.4320000e-02
  -1.3813000e-01
   1.1167000e-01
   3.6880000e-02
  -9.0810000e-02
   1.2108000e-01
  -8.6180000e-02
  -3.3750000e-02
   1.2009000e-01
  -4.9600000e-03
  -2.5500000e-02
  -1.0610000e-02
   5.1220000e-02
   5.6620000e-02
  -8.8920000e-02
  -6.3530000e-02
  -8.7500000e-03
   9.0640000e-02
   1.0740000e-01
  -1.2245000e-01
  -4.6560000e-02
  -4.3650000e-02
   9.9970000e-02
  -2.6290000e-02
  -2.3473000e-01
   2.0372000e-01
   5.8890000e-02
  -1.5382000e-01
   4.4420000e-02
  -1.6810000e-02
   6.9040000e-02
   3.8400000e-03
  -9.5440000e-02
   3.1610000e-02
   1.0838000e-01
  -1.0340000e-02
  -6.2050000e-02
  -1.0814000e-01
   1.2440000e-01
   3.9130000e-02
  -1.4079000e-01
  -4.6100000e-03
   8.0010000e-02
   1.6281000e-01
  -1.8751000e-01
  -1.7065000e-01
   2.7980000e-01
  -2.9750000e-02
  -1.3095000e-01
  -4.2030000e-02
   2.0542000e-01
   3.4080000e-02
  -2.0136000e-01
   5.6970000e-02
   9.4460000e-02
  -3.9890000e-02
  -5.0370000e-02
  -5.1350000e-02
   6.9530000e-02
  -2.5640000e-02
  -6.2380000e-02
   4.2990000e-02
   4.5240000e-02
   2.9150000e-02
  -6.3800000e-02
   9.1990000e-02
   3.3810000e-02
  -1.2667000e-01
   4.0140000e-02
   3.0190000e-02
   7.4140000e-02
  -5.3190000e-02
  -5.2530000e-02
   7.2250000e-02
   1.5550000e-02
  -1.4022000e-01
  -8.3650000e-02
   1.6336000e-01
   1.2207000e-01
  -2.7306000e-01
   5.0400000e-03
   1.4850000e-01
  -6.5120000e-02
  -5.4100000e-02
  -1.3904000e-01
   1.3843000e-01
   4.4770000e-02
  -2.3064000e-01
   1.7205000e-01
   1.5818000e-01
  -1.0962000e-01
  -9.9390000e-02
  -3.7120000e-02
   2.1282000e-01
   3.7800000e-03
  -1.8757000e-01
   5.2310000e-02
   1.6478000e-01
  -7.8720000e-02
  -7.0710000e-02
  -1.3490000e-02
   8.0170000e-02
  -4.7410000e-02
  -7.4630000e-02
   7.1370000e-02
   6.1910000e-02
  -9.9690000e-02
  -1.2185000e-01
   6.7480000e-02
   1.8255000e-01
  -9.7100000e-03
  -2.1871000e-01
   7.1290000e-02
   1.2508000e-01
  -8.9740000e-02
  -6.0950000e-02
   1.5820000e-02
   3.5260000e-02
  -1.0847000e-01
  -5.7740000e-02
   1.5157000e-01
   4.9110000e-02
  -2.8190000e-02
  -3.8880000e-02
  -3.2660000e-02
   1.5930000e-02
   4.4060000e-02
   1.3400000e-03
  -4.0250000e-02
   4.2800000e-02
   1.3050000e-02
  -5.7880000e-02
   6.1660000e-02
  -3.4900000e-02
  -1.1011000e-01
   6.3120000e-02
  -1.1650000e-02
  -5.1900000e-02
  -1.2993000e-01
   5.7910000e-02
   1.8085000e-01
   1.3930000e-02
  -2.1690000e-02
   7.5100000e-03
   8.2170000e-02
   4.1460000e-02
   2.8240000e-02
   1.9410000e-02
  -4.1320000e-02
  -2.5060000e-02
   4.7270000e-02
  -1.3849000e-01
  -8.5350000e-02
  -1.1710000e-02
  -9.6000000e-03
  -1.4890000e-02
  -3.5010000e-02
   5.6870000e-02
   1.9740000e-02
  -1.7990000e-02
  -1.9520000e-02
   9.0800000e-03
   5.7550000e-02
   6.8490000e-02
  -6.3580000e-02
  -2.7170000e-02
   1.2860000e-02
   5.0780000e-02
   5.8590000e-02
  -9.2400000e-02
   5.4320000e-02
   3.7840000e-02
  -7.8960000e-02
  -8.7460000e-02
   6.0510000e-02
   4.5930000e-02
  -9.8920000e-02
  -1.5190000e-02
   1.0402000e-01
   4.0250000e-02
  -4.3810000e-02
  -5.5660000e-02
  -1.6400000e-02
   2.0480000e-02
  -2.4650000e-02
   4.4700000e-03
   1.2069000e-01
  -1.0169000e-01
  -9.9000000e-03
  -1.2280000e-02
   2.3250000e-02
   1.0049000e-01
  -1.3089000e-01
   3.8850000e-02
   4.5500000e-03
  -1.8650000e-01
  -3.7000000e-03
   1.1661000e-01
  -5.8400000e-02
  -9.3190000e-02
   1.0378000e-01
   9.6590000e-02
  -1.6023000e-01
   6.5780000e-02
   4.9600000e-02
  -2.8270000e-02
   7.9460000e-02
  -4.0940000e-02
   5.8260000e-02
   5.8460000e-02
  -1.5916000e-01
   1.4759000e-01
   6.1400000e-03
  -7.3200000e-03
  -3.3260000e-02
   1.2766000e-01
   2.8820000e-02
  -1.6234000e-01
  -3.7920000e-02
   9.8600000e-02
  -4.4970000e-02
  -5.2420000e-02
  -6.7200000e-03
  -3.2080000e-02
   1.9220000e-02
  -6.7750000e-02
   1.1870000e-02
  -1.8400000e-03
   1.2230000e-02
  -4.8530000e-02
  -4.3430000e-02
   1.1814000e-01
   1.1239000e-01
  -6.0920000e-02
   7.4520000e-02
   3.1810000e-02
  -1.1033000e-01
  -7.8440000e-02
   5.0920000e-02
   1.8060000e-01
  -1.5077000e-01
  -1.7306000e-01
   9.4350000e-02
   3.4440000e-02
  -6.1640000e-02
  -6.7860000e-02
   5.4620000e-02
  -7.4000000e-03
  -2.4400000e-02
   1.5129000e-01
  -8.7350000e-02
   4.4060000e-02
  -8.5800000e-03
   1.0780000e-02
   3.3200000e-03
   7.5100000e-02
   9.8400000e-03
  -5.9250000e-02
  -3.6250000e-02
  -2.5830000e-02
  -1.0450000e-02
  -3.3120000e-02
   1.1159000e-01
  -6.0370000e-02
  -3.4140000e-02
   6.0240000e-02
  -1.4310000e-02
  -6.9810000e-02
  -1.1650000e-02
   2.9470000e-02
   9.6000000e-03
  -1.7117000e-01
   3.5150000e-02
   2.1268000e-01
  -7.9000000e-03
  -3.0878000e-01
   2.2804000e-01
   9.6700000e-02
  -1.7443000e-01
  -3.3420000e-02
  -3.1200000e-02
   1.0317000e-01
   2.1030000e-02
  -4.9330000e-02
  -1.1270000e-02
   8.9050000e-02
   7.4580000e-02
   1.5440000e-02
  -1.2448000e-01
   9.5000000e-02
   4.8010000e-02
  -8.7050000e-02
  -3.9730000e-02
   7.5900000e-03
   5.5400000e-03
   2.2620000e-02
  -1.8480000e-02
  -6.8130000e-02
   1.6940000e-02
  -6.1120000e-02
  -4.6280000e-02
   6.6760000e-02
  -5.5360000e-02
   3.5400000e-03
   4.1700000e-02
   7.8400000e-03
   1.6980000e-01
   1.3820000e-02
  -1.7080000e-02
  -5.3770000e-02
   3.7120000e-02
   5.8150000e-02
  -8.6600000e-03
  -5.8900000e-03
  -3.9590000e-02
  -8.5050000e-02
  -6.7750000e-02
  -2.3990000e-02
   9.0560000e-02
   6.4200000e-03
  -6.6570000e-02
  -5.2340000e-02
   2.0150000e-02
   9.0150000e-02
  -1.4425000e-01
  -3.5530000e-02
   1.3912000e-01
   7.2690000e-02
  -1.7328000e-01
   1.2574000e-01
   1.0816000e-01
  -8.6500000e-02
  -2.5500000e-02
   5.6200000e-03
   9.8070000e-02
  -9.8160000e-02
  -2.8840000e-02
   3.2380000e-02
   8.7000000e-02
  -9.5110000e-02
  -4.5840000e-02
  -9.1300000e-03
   4.1950000e-02
   1.6450000e-02
  -1.2015000e-01
   3.3720000e-02
   1.6180000e-02
  -2.1700000e-03
  -1.7160000e-02
   1.4395000e-01
  -2.6760000e-02
  -5.2890000e-02
   3.5400000e-03
  -4.5380000e-02
   9.1360000e-02
  -8.7270000e-02
  -1.4920000e-02
   3.2330000e-02
   2.8510000e-02
  -1.1380000e-02
   2.0950000e-02
   7.1000000e-03
