# Supplementary material for: A Novel Classification Method for Flutter Signals Based on the CNN and STFT
Source: Hindawi journal article supplement (doi:10.1155/2019/9375437), 2019-04-09
Supplement: f1 [file 9375437.f1.zip › 00_25_z18.0_22channel.txt]

  -7.9200000e-03
  -3.4660000e-02
   3.3090000e-02
   5.7850000e-02
  -4.1900000e-03
  -4.3020000e-02
  -6.8080000e-02
  -3.2130000e-02
   2.5330000e-02
   5.6480000e-02
   3.8000000e-02
  -2.3630000e-02
  -5.7600000e-03
  -4.8800000e-03
   3.9670000e-02
   7.2820000e-02
  -5.0200000e-03
  -1.4560000e-02
  -5.8150000e-02
  -4.1290000e-02
   1.9630000e-02
   2.9750000e-02
  -3.5100000e-03
  -6.4350000e-02
  -1.1240000e-02
  -1.0954000e-01
  -5.1490000e-02
   5.6730000e-02
  -4.3490000e-02
   8.8560000e-02
   3.6700000e-03
  -1.2580000e-02
   2.0560000e-02
  -2.8540000e-02
   1.6700000e-03
   1.9110000e-02
  -2.4400000e-02
  -8.1020000e-02
  -1.0990000e-02
  -4.9740000e-02
   1.1210000e-02
   5.4260000e-02
  -8.4750000e-02
   5.1930000e-02
  -6.6210000e-02
  -3.7120000e-02
   5.0860000e-02
  -1.6260000e-02
   5.3550000e-02
   1.4040000e-02
  -3.1890000e-02
  -2.4050000e-02
  -1.4000000e-03
   2.3470000e-02
  -3.0110000e-02
  -1.5710000e-02
  -2.4790000e-02
  -4.6360000e-02
   5.5960000e-02
   2.6900000e-02
   1.4640000e-02
   9.3080000e-02
  -4.2610000e-02
   7.5150000e-02
   5.5660000e-02
  -1.0416000e-01
   6.5060000e-02
  -6.8710000e-02
  -7.2000000e-02
   5.3360000e-02
  -6.7670000e-02
   5.2780000e-02
  -4.4530000e-02
   2.0590000e-02
  -3.8110000e-02
  -2.0300000e-03
   8.4860000e-02
  -1.0010000e-01
   5.8870000e-02
  -7.3450000e-02
  -5.0940000e-02
   6.7970000e-02
  -9.0670000e-02
   3.4350000e-02
  -4.6010000e-02
   1.8480000e-02
   4.5510000e-02
   3.5340000e-02
   3.5700000e-02
  -8.2580000e-02
   7.5260000e-02
  -6.1690000e-02
   6.8300000e-03
   6.7420000e-02
  -1.0030000e-01
   7.7590000e-02
  -3.7970000e-02
  -9.1580000e-02
   3.3000000e-04
  -2.9670000e-02
   6.2500000e-03
   2.4590000e-02
   3.5510000e-02
  -5.3790000e-02
   2.6320000e-02
   4.7730000e-02
  -3.6000000e-04
   1.0416000e-01
  -4.5510000e-02
  -4.4030000e-02
   2.5500000e-03
  -1.7580000e-02
  -1.1460000e-02
  -5.8670000e-02
  -7.2470000e-02
  -1.6040000e-02
  -3.6050000e-02
   2.0120000e-02
   1.6640000e-02
   8.8300000e-03
  -1.5820000e-02
  -5.0180000e-02
   5.3160000e-02
  -2.6540000e-02
   9.6200000e-03
   1.0390000e-02
  -9.2450000e-02
   3.2520000e-02
   7.7320000e-02
  -7.8200000e-02
   7.7460000e-02
  -3.3420000e-02
  -4.3380000e-02
   1.8780000e-02
  -4.2830000e-02
   3.1300000e-03
  -6.8980000e-02
   9.8200000e-03
  -4.7080000e-02
  -6.8710000e-02
   3.4770000e-02
  -3.5890000e-02
   4.2250000e-02
   2.1410000e-02
   1.1320000e-02
   2.4160000e-02
   8.2000000e-04
  -2.5420000e-02
   5.3960000e-02
  -4.3240000e-02
   5.7140000e-02
  -5.1330000e-02
  -7.3840000e-02
   1.9820000e-02
  -8.9790000e-02
   1.1477000e-01
  -3.2350000e-02
  -4.0330000e-02
   5.4010000e-02
  -4.5540000e-02
   8.9850000e-02
   8.9700000e-03
  -5.9420000e-02
  -1.9110000e-02
   2.2800000e-03
   1.4530000e-02
   6.1990000e-02
  -3.7730000e-02
   1.3650000e-02
   1.3130000e-02
   3.9800000e-03
   6.8800000e-03
   2.2100000e-02
  -5.5220000e-02
  -1.1820000e-02
   2.4760000e-02
  -5.7250000e-02
   5.5110000e-02
  -6.8440000e-02
  -2.0840000e-02
   7.1100000e-02
  -1.3000000e-02
   3.9760000e-02
  -8.3100000e-02
   1.5680000e-02
  -3.8360000e-02
   5.6970000e-02
   1.8780000e-02
  -6.9450000e-02
  -3.9070000e-02
  -5.6070000e-02
  -2.1220000e-02
   4.5820000e-02
   9.4300000e-03
   1.5400000e-03
  -2.3580000e-02
  -1.3110000e-02
   1.3270000e-02
   1.8780000e-02
   1.5190000e-02
  -3.2110000e-02
   1.5050000e-02
  -2.0320000e-02
  -8.3100000e-03
   2.6650000e-02
  -1.2873000e-01
   8.0340000e-02
  -5.3080000e-02
  -3.8170000e-02
   6.4730000e-02
  -9.7140000e-02
   5.6020000e-02
   1.6200000e-02
  -1.9930000e-02
  -6.3600000e-03
   4.3730000e-02
   1.0750000e-02
   3.0410000e-02
  -4.9680000e-02
  -5.3110000e-02
  -4.3760000e-02
   5.4260000e-02
   1.6310000e-02
  -5.2590000e-02
  -2.6620000e-02
  -8.1570000e-02
   6.4600000e-02
   4.4830000e-02
   1.4780000e-02
  -1.0990000e-02
  -6.5830000e-02
   3.4960000e-02
   2.0950000e-02
  -3.1970000e-02
   1.0254000e-01
  -2.3720000e-02
   3.9760000e-02
   3.9650000e-02
  -8.5900000e-02
   3.4930000e-02
  -5.2860000e-02
   2.4760000e-02
  -1.9850000e-02
  -6.0210000e-02
   1.3930000e-02
  -1.3650000e-02
   2.4950000e-02
  -3.9560000e-02
   5.1300000e-03
  -8.6230000e-02
   1.5680000e-02
   6.3720000e-02
  -6.8490000e-02
   8.9490000e-02
  -5.6500000e-03
  -4.6470000e-02
   8.3820000e-02
  -7.3560000e-02
   1.0890000e-01
   7.6800000e-03
  -6.7530000e-02
  -2.5120000e-02
  -9.5060000e-02
  -3.3000000e-04
   0.0000000e+00
   5.2120000e-02
  -3.3200000e-03
  -6.1530000e-02
   9.8320000e-02
  -5.7880000e-02
   6.4380000e-02
   9.7830000e-02
  -9.9010000e-02
  -2.9100000e-03
  -5.3680000e-02
  -3.5730000e-02
   4.9190000e-02
   3.5400000e-03
  -2.5940000e-02
  -5.7960000e-02
  -8.6230000e-02
   1.1050000e-02
  -1.3330000e-02
  -9.2400000e-03
  -2.2540000e-02
  -1.4584000e-01
   4.7680000e-02
  -7.4190000e-02
   6.0620000e-02
   4.4280000e-02
  -1.2133000e-01
   6.8850000e-02
  -3.7620000e-02
   2.1110000e-02
   1.2810000e-01
  -6.1610000e-02
   2.8430000e-02
  -4.8170000e-02
  -6.8600000e-02
   4.4200000e-02
  -3.8110000e-02
   9.3360000e-02
  -1.0087000e-01
   6.3100000e-03
   2.7400000e-03
  -9.3930000e-02
   1.7630000e-01
  -6.6740000e-02
   3.2850000e-02
   6.6020000e-02
  -6.0240000e-02
   7.7590000e-02
  -1.0340000e-02
  -2.0430000e-02
   1.7000000e-02
  -4.1920000e-02
  -5.7410000e-02
  -2.3090000e-02
  -3.4490000e-02
   3.2020000e-02
  -1.6420000e-02
   7.5950000e-02
  -7.1230000e-02
   3.4820000e-02
   6.7310000e-02
  -4.3100000e-02
   1.4759000e-01
  -1.6830000e-02
  -4.3900000e-03
  -7.6200000e-03
  -7.1000000e-03
  -1.4890000e-02
  -5.4600000e-03
   4.4100000e-03
  -6.4350000e-02
  -7.5400000e-03
  -1.3240000e-02
  -6.8790000e-02
  -1.4890000e-02
  -7.1600000e-03
  -5.6070000e-02
   7.2550000e-02
   5.8000000e-04
  -3.7070000e-02
  -3.0020000e-02
  -6.7260000e-02
  -3.1260000e-02
   2.1850000e-02
   2.2500000e-03
  -1.7330000e-02
   2.0670000e-02
  -1.8890000e-02
   1.5770000e-02
  -4.7300000e-02
   9.9500000e-03
  -2.0020000e-02
  -3.8400000e-03
   2.7800000e-02
  -2.6680000e-02
  -3.6380000e-02
   1.4120000e-02
  -4.6530000e-02
  -1.4070000e-02
  -4.4390000e-02
  -4.0300000e-02
   2.2810000e-02
   2.5000000e-03
   6.7040000e-02
   1.0530000e-02
   4.5380000e-02
   1.5130000e-02
   1.0781000e-01
  -5.3550000e-02
  -3.6930000e-02
  -1.2640000e-02
  -1.0819000e-01
   7.3700000e-02
  -6.6680000e-02
  -7.9680000e-02
   4.4420000e-02
  -5.5520000e-02
   7.9730000e-02
   7.6280000e-02
  -8.3020000e-02
  -2.1500000e-02
  -3.9130000e-02
  -2.4320000e-02
   1.0550000e-01
   1.6450000e-02
   4.8040000e-02
  -4.0360000e-02
  -4.8450000e-02
   3.5290000e-02
   1.2010000e-02
   4.2500000e-02
  -6.7910000e-02
  -8.7630000e-02
  -2.8760000e-02
  -3.8100000e-03
   9.1550000e-02
   2.3170000e-02
   3.7700000e-02
  -3.3530000e-02
  -1.6150000e-02
  -3.0000000e-05
  -1.6200000e-03
  -1.3110000e-02
   8.3760000e-02
  -1.2280000e-02
  -7.6800000e-03
   6.8490000e-02
  -1.0024000e-01
   6.0680000e-02
  -2.7360000e-02
  -8.7460000e-02
   5.5690000e-02
  -1.2593000e-01
   3.0630000e-02
   3.7370000e-02
  -3.3310000e-02
   5.2620000e-02
  -7.5210000e-02
   6.0600000e-03
   4.3760000e-02
  -4.2940000e-02
   1.5380000e-02
  -3.3940000e-02
  -5.5250000e-02
   5.1740000e-02
   1.7930000e-02
  -4.1400000e-02
   1.4720000e-02
  -5.6430000e-02
  -5.3200000e-03
   2.0620000e-02
  -1.0700000e-03
  -4.0990000e-02
   1.8970000e-02
  -6.2000000e-03
  -2.7880000e-02
   3.0240000e-02
  -3.6960000e-02
  -1.8230000e-02
  -5.3300000e-02
  -9.3500000e-03
  -2.8490000e-02
   6.1400000e-03
   3.1040000e-02
  -6.9070000e-02
   7.7510000e-02
  -2.1770000e-02
  -4.0390000e-02
   6.7200000e-02
  -7.5130000e-02
  -4.0140000e-02
   5.3900000e-02
  -4.6580000e-02
  -1.6200000e-03
   5.0340000e-02
  -3.3830000e-02
  -3.6770000e-02
   5.9660000e-02
   1.1490000e-02
  -5.5060000e-02
   1.3194000e-01
  -8.5240000e-02
   4.4940000e-02
   8.1650000e-02
  -6.8710000e-02
   6.4790000e-02
  -4.9300000e-02
  -5.0480000e-02
   3.3670000e-02
  -3.7600000e-03
  -1.1430000e-02
   1.5100000e-03
  -1.4700000e-02
   9.7330000e-02
   5.8590000e-02
   2.8840000e-02
   9.6000000e-04
  -8.7710000e-02
   5.0810000e-02
  -9.0150000e-02
  -2.4760000e-02
   2.0950000e-02
  -1.5730000e-01
   6.8570000e-02
   1.9770000e-02
  -6.6210000e-02
   4.0410000e-02
  -6.9310000e-02
  -7.5620000e-02
   4.1700000e-02
  -2.1390000e-02
   2.1610000e-02
  -2.4050000e-02
   2.1100000e-03
   4.5490000e-02
  -1.1270000e-02
   2.9170000e-02
  -5.4340000e-02
  -5.0370000e-02
  -1.2900000e-03
  -1.1998000e-01
   6.8980000e-02
  -7.9760000e-02
   8.1200000e-03
   9.3930000e-02
  -5.2670000e-02
   3.6660000e-02
  -3.2760000e-02
  -6.9340000e-02
  -4.0600000e-03
   5.8070000e-02
   3.1970000e-02
   2.2260000e-02
   5.3770000e-02
  -8.3760000e-02
   4.2090000e-02
   3.8930000e-02
  -7.9510000e-02
  -9.1900000e-03
  -1.4619000e-01
   4.1900000e-03
  -5.0700000e-03
   2.0340000e-02
   1.3160000e-02
   3.6500000e-03
   3.0980000e-02
   1.2090000e-02
   5.5440000e-02
  -7.0500000e-03
  -5.9360000e-02
  -1.3350000e-02
   9.1000000e-03
   2.3940000e-02
   1.1346000e-01
  -7.7300000e-03
   1.2780000e-02
  -2.5990000e-02
  -2.8730000e-02
   8.7500000e-03
  -1.4890000e-02
  -7.4110000e-02
  -2.1000000e-02
   1.9330000e-02
  -6.7400000e-03
   5.7440000e-02
  -5.6840000e-02
  -5.7300000e-03
   2.2400000e-02
   3.6050000e-02
  -2.3600000e-03
  -3.7480000e-02
   2.3940000e-02
  -2.9640000e-02
   2.3330000e-02
  -2.9500000e-02
  -1.8450000e-02
  -3.9760000e-02
  -2.5030000e-02
  -2.1440000e-02
  -8.6970000e-02
   2.9940000e-02
  -2.8900000e-02
  -7.1000000e-04
   3.2710000e-02
  -3.2440000e-02
   2.0100000e-02
   5.6760000e-02
  -4.2550000e-02
   2.9230000e-02
  -1.6420000e-02
  -5.6120000e-02
   3.3450000e-02
  -1.7550000e-02
   3.6300000e-02
   9.2700000e-03
  -7.3730000e-02
   9.9000000e-04
  -4.3070000e-02
   3.3370000e-02
  -1.3080000e-02
  -7.4600000e-03
   1.3160000e-02
  -6.0480000e-02
   9.3030000e-02
  -1.3930000e-02
  -4.6250000e-02
   6.1440000e-02
  -1.0227000e-01
  -1.7030000e-02
   1.4480000e-02
  -5.4890000e-02
   1.3980000e-02
  -5.0400000e-03
   1.0640000e-02
   2.3910000e-02
   1.1900000e-02
   1.7030000e-02
   1.5770000e-02
  -7.1600000e-03
  -2.1140000e-02
  -3.6250000e-02
  -2.4700000e-03
  -1.3850000e-02
  -2.8650000e-02
  -2.9940000e-02
  -3.1450000e-02
  -7.3800000e-03
   3.2550000e-02
   4.4010000e-02
   4.4100000e-03
   8.9400000e-03
  -7.2360000e-02
   1.2480000e-02
   2.6680000e-02
   3.3780000e-02
   5.7820000e-02
  -6.2920000e-02
   2.4100000e-03
  -6.6900000e-02
   2.6400000e-02
   8.5500000e-03
   4.9870000e-02
   4.2440000e-02
  -3.1830000e-02
   3.0380000e-02
  -7.2800000e-02
   6.3340000e-02
  -1.6830000e-02
  -5.4400000e-02
   4.8060000e-02
  -5.0370000e-02
   7.3120000e-02
  -9.9800000e-03
  -6.2320000e-02
  -1.9270000e-02
  -5.9770000e-02
   1.0100000e-03
  -2.1630000e-02
  -2.2460000e-02
  -6.6710000e-02
   1.0100000e-03
   1.3520000e-02
   8.2500000e-03
   3.0190000e-02
   2.5660000e-02
   3.5670000e-02
  -3.3290000e-02
  -2.2510000e-02
  -1.6970000e-02
  -5.3220000e-02
   2.1910000e-02
   2.9600000e-03
  -3.8960000e-02
   4.8800000e-02
  -7.1100000e-02
  -1.3700000e-03
   2.9530000e-02
  -3.6220000e-02
   5.5300000e-02
  -6.8820000e-02
  -4.6360000e-02
  -1.7160000e-02
  -2.2400000e-02
   5.4100000e-02
  -5.6500000e-03
   1.6400000e-02
  -2.8500000e-03
  -9.0510000e-02
   2.3900000e-03
  -3.2350000e-02
  -4.7000000e-04
   5.8400000e-03
   1.2370000e-02
  -6.0650000e-02
   1.7220000e-02
   3.9510000e-02
  -2.8460000e-02
   1.7930000e-02
  -3.1230000e-02
  -1.9060000e-02
   4.8750000e-02
  -7.1590000e-02
   1.3015000e-01
   2.8680000e-02
  -6.1330000e-02
   9.7140000e-02
  -6.1640000e-02
  -3.8000000e-04
   1.0109000e-01
  -9.5910000e-02
  -4.6970000e-02
  -7.0500000e-03
  -6.9010000e-02
   5.3900000e-02
  -3.6380000e-02
  -5.0940000e-02
   1.9820000e-02
   1.5000000e-02
   7.6500000e-03
   4.1430000e-02
   2.2840000e-02
   2.3900000e-03
   7.6770000e-02
   4.0630000e-02
  -3.2000000e-02
   5.3740000e-02
  -3.7780000e-02
  -8.1790000e-02
  -2.8980000e-02
  -3.3670000e-02
  -9.9800000e-02
   6.0160000e-02
   8.2000000e-04
  -3.8850000e-02
   9.1220000e-02
  -2.8840000e-02
  -4.8300000e-03
   5.8540000e-02
  -3.6630000e-02
  -1.1820000e-02
   1.2300000e-03
  -5.8260000e-02
  -9.1600000e-03
  -2.0020000e-02
  -7.1370000e-02
  -3.7070000e-02
  -7.2700000e-03
  -1.1488000e-01
   5.9440000e-02
   9.3800000e-03
  -4.6360000e-02
   1.0287000e-01
  -4.4830000e-02
   4.1180000e-02
   6.9900000e-03
   4.1000000e-04
  -6.5120000e-02
  -1.1680000e-02
  -5.6180000e-02
   4.2110000e-02
  -1.1020000e-02
  -6.0400000e-02
  -1.5440000e-02
  -2.8620000e-02
   5.0450000e-02
   2.8350000e-02
  -7.4000000e-03
  -1.4480000e-02
  -2.2590000e-02
   3.1390000e-02
  -4.2200000e-02
   5.7690000e-02
  -9.4900000e-03
  -1.2150000e-02
   3.1910000e-02
  -8.2720000e-02
   2.0370000e-02
  -4.7240000e-02
  -3.2300000e-02
   4.0330000e-02
   1.2750000e-02
   1.2370000e-02
   8.4860000e-02
  -7.9400000e-02
   2.9690000e-02
   5.8040000e-02
  -8.5490000e-02
   7.2820000e-02
  -1.8810000e-02
  -2.3740000e-02
   8.8310000e-02
   2.4210000e-02
   2.3550000e-02
   3.6820000e-02
   4.0060000e-02
  -6.1310000e-02
   1.0140000e-02
  -1.4000000e-04
  -1.0359000e-01
   1.2230000e-02
  -2.5200000e-02
  -1.0858000e-01
   3.9780000e-02
  -5.1550000e-02
  -4.9630000e-02
   1.0298000e-01
  -9.4650000e-02
  -2.8800000e-03
   6.7830000e-02
  -4.7050000e-02
   1.0863000e-01
   4.4280000e-02
  -7.6220000e-02
   3.8330000e-02
  -3.1280000e-02
  -1.7360000e-02
  -1.0780000e-02
  -1.4839000e-01
  -3.0020000e-02
  -4.7160000e-02
  -4.4700000e-03
  -4.0300000e-03
  -2.7390000e-02
   5.9000000e-02
  -4.4750000e-02
   7.7400000e-02
  -6.4130000e-02
   2.2810000e-02
   1.1672000e-01
  -3.4460000e-02
   8.6090000e-02
   8.6400000e-03
  -1.0989000e-01
   7.1290000e-02
  -7.5950000e-02
  -8.3820000e-02
  -1.1240000e-02
  -1.6270000e-01
  -1.1900000e-02
  -1.2050000e-01
  -4.3490000e-02
   4.6640000e-02
   5.6450000e-02
   5.5470000e-02
   6.2200000e-03
   1.6370000e-02
   5.1900000e-02
   7.8660000e-02
   7.9590000e-02
  -6.9900000e-03
  -2.1820000e-02
  -9.5720000e-02
  -4.1650000e-02
  -5.9500000e-02
  -3.2380000e-02
  -5.5630000e-02
  -2.8730000e-02
  -1.5270000e-02
  -6.1660000e-02
   7.5320000e-02
   1.1270000e-02
  -6.5300000e-03
   9.7720000e-02
   9.2400000e-03
   1.2780000e-01
   6.6460000e-02
  -3.8800000e-02
   9.5940000e-02
  -5.2150000e-02
   7.5480000e-02
   2.8000000e-03
  -1.1417000e-01
   1.1270000e-02
  -1.2577000e-01
  -1.8150000e-02
  -7.6440000e-02
  -2.1960000e-02
  -8.3980000e-02
   1.5930000e-02
   1.0512000e-01
   4.4770000e-02
   1.0095000e-01
   5.1130000e-02
   2.9780000e-02
   5.1160000e-02
   8.3430000e-02
  -3.4680000e-02
  -2.8760000e-02
  -4.4200000e-02
  -8.2500000e-02
  -6.9500000e-02
  -6.0790000e-02
  -7.9200000e-03
  -7.4190000e-02
  -4.3160000e-02
   2.3900000e-03
  -1.7160000e-02
   1.3232000e-01
   2.9940000e-02
   5.0400000e-03
   6.3530000e-02
  -9.8810000e-02
   2.6180000e-02
  -2.4620000e-02
  -8.0010000e-02
  -3.3670000e-02
  -2.2350000e-02
  -8.9960000e-02
   5.6370000e-02
   7.6200000e-03
  -1.3177000e-01
  -6.8000000e-03
  -6.0760000e-02
  -3.1830000e-02
   8.7050000e-02
  -3.3150000e-02
  -7.0660000e-02
   1.5520000e-02
  -2.3630000e-02
   4.5650000e-02
   1.2058000e-01
   2.2590000e-02
  -4.6140000e-02
  -3.9180000e-02
  -2.5830000e-02
  -5.2340000e-02
   4.5980000e-02
  -2.6900000e-02
  -6.8930000e-02
   2.3940000e-02
  -6.3310000e-02
   8.7880000e-02
   1.1350000e-02
   2.1440000e-02
  -4.0720000e-02
   2.2730000e-02
   2.4950000e-02
   1.7930000e-02
   8.5270000e-02
  -4.5800000e-03
   1.0640000e-02
   1.9990000e-02
  -2.6180000e-02
   2.5800000e-03
  -2.3660000e-02
   3.0130000e-02
  -3.4410000e-02
   2.4100000e-02
   1.2750000e-02
  -8.6390000e-02
   5.8540000e-02
  -6.6320000e-02
   5.4800000e-03
   1.9690000e-02
  -1.8640000e-02
   5.6200000e-03
   4.5500000e-03
   2.6050000e-02
   1.1190000e-02
   5.1790000e-02
  -4.7730000e-02
  -5.3700000e-03
  -3.4050000e-02
  -7.2630000e-02
  -4.9600000e-02
  -2.0870000e-02
  -2.3940000e-02
  -1.4260000e-02
   9.1900000e-03
  -4.3900000e-02
   4.7190000e-02
   1.4070000e-02
   2.4210000e-02
  -7.5100000e-03
   8.0000000e-04
   3.0460000e-02
  -4.0220000e-02
   3.5700000e-02
   1.0450000e-02
  -3.3010000e-02
  -2.5120000e-02
  -5.4210000e-02
  -5.7280000e-02
  -2.2510000e-02
  -5.1520000e-02
  -6.6270000e-02
  -3.6250000e-02
   6.6600000e-02
  -1.6500000e-03
   4.2250000e-02
   1.8180000e-02
  -4.3570000e-02
   3.2520000e-02
   5.0120000e-02
  -5.2400000e-03
   2.9360000e-02
  -1.1190000e-02
  -4.0880000e-02
   3.0700000e-03
  -2.6540000e-02
  -2.0100000e-02
   3.3120000e-02
  -9.8350000e-02
   5.1820000e-02
  -2.2460000e-02
  -3.1500000e-03
   7.5480000e-02
  -5.0010000e-02
   3.6440000e-02
  -1.9300000e-02
   6.8000000e-03
   3.6300000e-02
  -2.3960000e-02
   1.1870000e-02
  -3.2900000e-03
  -2.9230000e-02
   3.1530000e-02
  -3.5920000e-02
  -1.3380000e-02
  -2.8200000e-03
  -7.0490000e-02
   3.3120000e-02
  -4.4720000e-02
  -1.9300000e-02
   1.3080000e-02
  -1.2349000e-01
   3.4820000e-02
   2.8570000e-02
   5.1380000e-02
   8.3790000e-02
  -2.3720000e-02
   3.5400000e-03
  -2.9060000e-02
   2.7690000e-02
   4.1040000e-02
  -3.1390000e-02
   3.5600000e-03
  -9.8680000e-02
   1.8620000e-02
  -3.9430000e-02
  -4.5820000e-02
   9.6200000e-03
  -5.8920000e-02
   4.5540000e-02
   6.6080000e-02
  -9.2100000e-03
   6.1470000e-02
  -1.2390000e-02
  -3.4600000e-02
   9.8380000e-02
  -2.5250000e-02
   6.8240000e-02
  -5.5170000e-02
  -9.4290000e-02
  -1.1650000e-02
  -1.0394000e-01
   3.9450000e-02
  -4.6450000e-02
  -1.2160000e-01
   3.1890000e-02
  -1.0139000e-01
   1.3248000e-01
   1.1661000e-01
  -3.7560000e-02
   9.5390000e-02
  -6.7750000e-02
   2.6270000e-02
  -6.6900000e-03
   7.3200000e-03
  -6.0130000e-02
  -8.3840000e-02
   3.6660000e-02
  -1.5286000e-01
   3.8470000e-02
  -5.5170000e-02
  -1.5160000e-02
   3.5860000e-02
  -2.1990000e-02
   2.3280000e-02
  -1.4500000e-03
   4.6670000e-02
   1.9740000e-02
   3.3150000e-02
   5.8620000e-02
  -2.4680000e-02
   8.0100000e-03
  -4.7020000e-02
  -5.0010000e-02
  -4.1950000e-02
  -6.2620000e-02
  -3.8190000e-02
  -5.1220000e-02
   5.0810000e-02
  -5.0500000e-02
   1.0200000e-02
   4.4390000e-02
  -4.2250000e-02
   1.1162000e-01
   6.2540000e-02
  -2.8190000e-02
   6.4600000e-02
  -7.9240000e-02
   4.1950000e-02
   8.3050000e-02
  -2.3520000e-02
   1.9820000e-02
  -7.9290000e-02
  -5.3820000e-02
   9.7900000e-03
  -1.9270000e-02
   3.2330000e-02
  -3.3500000e-03
  -5.2000000e-04
  -1.5550000e-02
  -2.4950000e-02
   4.0550000e-02
  -5.0700000e-03
   1.9880000e-02
  -2.4790000e-02
   1.3820000e-02
  -6.0350000e-02
   2.4050000e-02
  -1.6830000e-02
  -4.0850000e-02
   1.2750000e-02
  -5.2970000e-02
  -4.2220000e-02
  -4.6600000e-03
  -6.3450000e-02
   3.8910000e-02
  -8.7500000e-03
  -1.5130000e-02
  -1.7630000e-02
  -3.0570000e-02
   7.0740000e-02
   1.4500000e-03
   1.9200000e-03
  -2.2510000e-02
  -6.1220000e-02
  -5.4430000e-02
   4.7540000e-02
   2.3110000e-02
  -3.1300000e-03
  -7.7900000e-03
  -1.1960000e-01
   7.3800000e-03
   2.2700000e-02
   1.4070000e-02
   3.0110000e-02
  -1.0682000e-01
   1.0408000e-01
   2.7660000e-02
   2.6100000e-02
   7.2190000e-02
  -4.7980000e-02
  -3.5560000e-02
   3.5040000e-02
  -5.9630000e-02
  -3.8900000e-03
   8.6100000e-03
  -1.5410000e-02
  -1.8670000e-02
  -3.7000000e-03
  -5.3700000e-03
  -3.7510000e-02
   4.1130000e-02
  -2.7910000e-02
  -4.4550000e-02
   8.7770000e-02
  -7.3340000e-02
   5.5550000e-02
   7.2710000e-02
  -8.7300000e-02
   8.0640000e-02
  -2.5010000e-02
  -3.9450000e-02
   2.2400000e-02
  -4.6090000e-02
   1.7580000e-02
   3.4000000e-03
  -3.7650000e-02
   1.0580000e-02
  -6.5310000e-02
  -2.9170000e-02
  -6.9000000e-04
   1.5600000e-02
   4.9570000e-02
  -7.9200000e-03
   3.6770000e-02
  -1.3700000e-03
   3.7290000e-02
   6.4460000e-02
  -4.8750000e-02
   6.0600000e-03
   2.5310000e-02
  -8.1730000e-02
  -5.4010000e-02
  -2.9300000e-03
  -8.8180000e-02
   3.1500000e-03
   2.3660000e-02
  -3.6600000e-02
  -3.7560000e-02
   2.5940000e-02
  -3.0080000e-02
  -1.3630000e-02
   8.9490000e-02
  -9.8200000e-03
   4.0190000e-02
   1.2105000e-01
  -9.9470000e-02
  -1.5520000e-02
   1.3330000e-02
  -6.0590000e-02
   5.0610000e-02
  -6.0100000e-02
  -1.5154000e-01
  -5.6400000e-02
  -3.8440000e-02
   2.3110000e-02
   1.9660000e-02
   1.0720000e-02
  -4.1810000e-02
   2.8240000e-02
   7.6170000e-02
   3.5860000e-02
   3.2240000e-02
   3.3640000e-02
   1.5240000e-02
   9.7300000e-03
  -3.9500000e-03
   6.2200000e-03
  -5.2200000e-02
  -7.2330000e-02
  -6.8110000e-02
  -7.4250000e-02
   2.3300000e-03
  -1.4040000e-02
   2.3800000e-02
  -1.3240000e-02
   2.0540000e-02
   4.9000000e-02
   6.4870000e-02
   8.4940000e-02
   1.4500000e-03
   9.3800000e-03
  -9.2650000e-02
   2.9100000e-03
   4.7840000e-02
  -6.3310000e-02
   3.2550000e-02
  -6.2350000e-02
  -5.6230000e-02
   1.1270000e-02
  -1.9930000e-02
   3.2600000e-03
  -1.0090000e-02
   1.6750000e-02
   3.7180000e-02
  -4.9100000e-03
   9.1030000e-02
   7.7320000e-02
  -5.5030000e-02
   8.7820000e-02
  -1.0071000e-01
  -8.6150000e-02
   7.9180000e-02
  -1.2423000e-01
   6.9780000e-02
  -7.1400000e-02
  -6.6380000e-02
   4.8940000e-02
  -9.4370000e-02
   7.4390000e-02
   2.1100000e-03
  -1.1300000e-02
   2.5280000e-02
  -3.2710000e-02
  -8.0600000e-03
   3.6630000e-02
   8.5650000e-02
   8.7200000e-03
  -4.0170000e-02
  -3.6300000e-02
  -5.2750000e-02
  -1.8730000e-02
   2.9100000e-03
  -1.5469000e-01
  -3.5780000e-02
  -5.9960000e-02
   1.7410000e-02
   7.9460000e-02
  -4.1760000e-02
   1.0274000e-01
  -1.0811000e-01
   2.4130000e-02
   6.2490000e-02
  -4.1130000e-02
   1.1129000e-01
  -1.8620000e-02
  -4.3730000e-02
   2.5990000e-02
  -4.8280000e-02
   2.2320000e-02
   8.2300000e-03
  -5.4430000e-02
  -4.1150000e-02
  -9.8400000e-03
  -1.6640000e-02
   4.3290000e-02
  -3.6800000e-02
  -5.4010000e-02
   3.7860000e-02
  -3.2630000e-02
   3.4300000e-03
  -8.7200000e-03
   1.9440000e-02
  -9.5400000e-03
   1.2407000e-01
   1.8900000e-03
   1.6070000e-02
   3.5950000e-02
  -8.4830000e-02
   8.5800000e-03
  -6.7810000e-02
  -1.8780000e-02
  -9.9800000e-03
  -1.8730000e-02
  -4.3590000e-02
  -2.9830000e-02
   4.0300000e-03
   3.5480000e-02
   3.4380000e-02
   5.5880000e-02
  -4.0630000e-02
   2.4400000e-03
   4.5980000e-02
  -4.5650000e-02
   1.0882000e-01
   2.8350000e-02
  -8.1730000e-02
   3.6270000e-02
  -9.7550000e-02
   1.5240000e-02
   5.4400000e-02
  -7.9870000e-02
  -5.9220000e-02
  -6.1030000e-02
  -9.7100000e-03
   5.3470000e-02
   1.5850000e-02
  -4.5540000e-02
  -5.4000000e-03
   2.9500000e-02
   1.3050000e-02
   7.1860000e-02
   3.0430000e-02
  -4.4940000e-02
   6.2800000e-03
  -4.4990000e-02
  -4.3590000e-02
  -4.2640000e-02
  -1.3680000e-02
  -3.7970000e-02
   5.3700000e-03
   3.8190000e-02
  -3.3890000e-02
  -4.5160000e-02
   2.6460000e-02
  -1.0990000e-02
   1.3330000e-02
   7.7650000e-02
  -1.1817000e-01
   4.8780000e-02
  -7.0680000e-02
   1.2970000e-02
   6.7370000e-02
  -9.1550000e-02
   3.1860000e-02
  -3.1890000e-02
  -1.1255000e-01
   4.3490000e-02
  -1.0170000e-02
  -2.3280000e-02
   8.4580000e-02
  -3.2760000e-02
  -5.3770000e-02
  -2.7000000e-04
   6.3860000e-02
  -2.1030000e-02
   4.5790000e-02
   1.0040000e-02
  -7.2630000e-02
   1.1137000e-01
  -2.9830000e-02
  -9.3000000e-04
   3.7540000e-02
  -1.2530000e-01
   3.1150000e-02
  -6.4410000e-02
  -1.1540000e-02
   5.3790000e-02
  -6.1610000e-02
   4.0800000e-02
  -3.7180000e-02
   2.0870000e-02
   8.7880000e-02
  -1.1460000e-02
   6.1220000e-02
  -9.6320000e-02
   5.1000000e-03
   2.5530000e-02
  -2.9800000e-02
   1.6780000e-02
  -1.0970000e-02
   1.0830000e-02
   4.6250000e-02
   1.5980000e-02
  -4.0280000e-02
  -5.4430000e-02
  -4.4800000e-02
  -4.7570000e-02
   2.2370000e-02
  -8.1400000e-03
   2.8320000e-02
  -4.0060000e-02
   7.3200000e-03
  -5.4400000e-02
   2.1820000e-02
  -1.9200000e-03
  -3.7860000e-02
   9.9360000e-02
  -7.7070000e-02
   3.5590000e-02
   2.7660000e-02
  -9.3690000e-02
   7.6630000e-02
  -4.1040000e-02
  -6.5560000e-02
   5.4100000e-02
  -2.0600000e-03
  -6.0920000e-02
   5.8900000e-03
  -2.5860000e-02
  -4.2220000e-02
   6.6900000e-02
   2.0370000e-02
  -4.9930000e-02
  -1.7710000e-02
  -4.9430000e-02
  -3.4600000e-02
   6.2070000e-02
   4.5380000e-02
  -4.0830000e-02
   6.2500000e-03
  -6.2710000e-02
  -1.9220000e-02
   4.9740000e-02
   3.2680000e-02
   1.1300000e-02
  -3.0740000e-02
  -9.0120000e-02
   1.2900000e-03
   7.0740000e-02
  -6.3940000e-02
   7.3670000e-02
  -1.0211000e-01
  -5.3790000e-02
   1.1518000e-01
  -1.2141000e-01
   5.1600000e-02
   8.7200000e-03
  -6.1200000e-02
   8.1980000e-02
  -3.6900000e-02
   1.9110000e-02
   6.3640000e-02
   7.2400000e-03
  -1.1080000e-02
  -4.7730000e-02
  -1.7190000e-02
  -4.3590000e-02
   1.3570000e-02
   7.9800000e-03
  -3.1260000e-02
   1.3870000e-02
   6.3100000e-03
   2.4070000e-02
   5.6540000e-02
  -1.3380000e-02
  -1.9220000e-02
   9.5100000e-03
   1.3900000e-02
  -8.5800000e-03
  -3.4520000e-02
  -6.8800000e-03
  -4.6010000e-02
   4.4280000e-02
  -6.3300000e-03
  -4.6940000e-02
   1.6150000e-02
  -1.9710000e-02
   6.6000000e-04
   6.1550000e-02
   1.9600000e-02
   2.6240000e-02
  -1.3760000e-02
  -1.0433000e-01
  -6.6900000e-03
  -4.2200000e-02
   2.6600000e-03
  -5.8100000e-03
  -3.6050000e-02
  -1.3460000e-02
   2.4270000e-02
  -1.9700000e-03
   2.1630000e-02
   1.9550000e-02
   3.1000000e-03
   2.3500000e-02
  -5.5220000e-02
  -3.7210000e-02
  -2.5610000e-02
  -3.8900000e-03
   7.0080000e-02
  -1.3410000e-02
  -8.7550000e-02
  -1.5380000e-02
  -4.0550000e-02
  -3.2270000e-02
   4.5460000e-02
  -6.1690000e-02
   2.9390000e-02
   1.9030000e-02
   1.7470000e-02
   6.6130000e-02
  -1.5770000e-02
   1.6340000e-02
  -3.7620000e-02
  -5.4040000e-02
  -1.4780000e-02
   2.3500000e-02
  -1.5050000e-02
  -4.4970000e-02
  -8.1700000e-03
  -8.4400000e-03
   5.3190000e-02
   5.5470000e-02
   1.8180000e-02
  -5.8870000e-02
   1.7190000e-02
  -5.5910000e-02
   5.5410000e-02
   3.4600000e-02
  -5.2780000e-02
   1.7250000e-02
  -1.0649000e-01
   4.8310000e-02
  -1.7930000e-02
   5.9280000e-02
  -8.9400000e-03
  -9.2670000e-02
  -2.8380000e-02
  -1.2310000e-02
   5.8070000e-02
   4.1920000e-02
  -3.0240000e-02
   1.5880000e-02
  -2.9200000e-02
   6.6540000e-02
   4.4310000e-02
   2.0970000e-02
   2.6320000e-02
  -1.0356000e-01
  -2.0300000e-03
  -8.1200000e-03
  -3.4460000e-02
   6.3990000e-02
  -1.4987000e-01
  -5.0310000e-02
   1.1870000e-02
  -2.5390000e-02
   9.0230000e-02
  -3.2960000e-02
   2.3140000e-02
  -2.7720000e-02
  -1.9000000e-02
   1.2069000e-01
  -2.1610000e-02
   3.7290000e-02
   8.1400000e-03
  -8.1350000e-02
   6.9530000e-02
  -4.1460000e-02
  -1.8590000e-02
   1.9580000e-02
  -1.6678000e-01
   7.3480000e-02
  -9.6620000e-02
  -5.7190000e-02
   9.6070000e-02
  -8.4340000e-02
   5.2620000e-02
  -3.1000000e-03
  -5.2920000e-02
   8.4340000e-02
   4.4700000e-03
   4.5570000e-02
   1.9740000e-02
  -5.3990000e-02
   2.2070000e-02
  -1.9000000e-02
   1.1020000e-02
  -3.8470000e-02
  -5.1130000e-02
  -5.3140000e-02
   2.4370000e-02
  -3.0520000e-02
  -8.9700000e-03
  -5.4800000e-03
  -7.7180000e-02
   3.3530000e-02
   2.6900000e-03
   1.9520000e-02
   7.7760000e-02
  -4.6640000e-02
  -1.2640000e-02
   6.8460000e-02
   3.5670000e-02
   6.8440000e-02
   1.0800000e-02
  -3.1830000e-02
  -9.5390000e-02
   3.2050000e-02
  -3.4000000e-02
  -1.0263000e-01
  -5.3250000e-02
  -7.3100000e-02
  -5.4320000e-02
   1.0965000e-01
   2.8410000e-02
  -4.7700000e-03
   5.5520000e-02
  -5.9060000e-02
   1.2618000e-01
   3.0200000e-03
  -4.1700000e-03
  -1.2780000e-02
  -1.0306000e-01
   5.0010000e-02
  -9.5140000e-02
  -5.5000000e-04
  -5.2670000e-02
  -8.5980000e-02
   5.9330000e-02
  -1.7410000e-02
   8.5000000e-04
   4.2390000e-02
  -9.5090000e-02
   1.0071000e-01
   3.4820000e-02
   6.8870000e-02
   6.4510000e-02
  -5.8370000e-02
  -5.3900000e-02
  -2.6380000e-02
   3.7290000e-02
   1.1760000e-02
   1.2040000e-02
  -7.0550000e-02
  -1.1170000e-01
   2.6270000e-02
   1.0780000e-02
   4.2280000e-02
   6.0980000e-02
  -7.5650000e-02
   1.7470000e-02
  -1.3520000e-02
  -3.5900000e-03
   1.2996000e-01
  -6.9860000e-02
   2.6650000e-02
  -6.9500000e-02
  -8.7220000e-02
   2.4480000e-02
  -4.8120000e-02
  -2.2020000e-02
   2.9780000e-02
  -4.1760000e-02
  -6.4130000e-02
   8.5430000e-02
   4.2140000e-02
   4.2110000e-02
  -4.4800000e-02
  -4.6360000e-02
  -6.6130000e-02
   7.4930000e-02
   5.0940000e-02
  -5.0480000e-02
   7.4660000e-02
  -5.7820000e-02
   2.1960000e-02
  -1.3740000e-02
  -1.3350000e-02
  -5.4950000e-02
  -1.9270000e-02
  -3.7700000e-02
  -7.4300000e-02
   7.8280000e-02
  -4.8060000e-02
   1.7630000e-02
   5.0590000e-02
  -2.2730000e-02
   1.4640000e-02
  -1.0640000e-02
  -1.9600000e-02
  -4.3180000e-02
  -1.1380000e-02
   3.6770000e-02
  -8.2090000e-02
   9.2670000e-02
  -8.1930000e-02
   1.1600000e-02
   4.8340000e-02
  -4.5900000e-02
   2.2100000e-02
  -8.2500000e-02
   5.1800000e-03
  -7.0030000e-02
   1.1058000e-01
  -6.4200000e-03
   1.4780000e-02
   7.4140000e-02
  -7.7540000e-02
   9.5610000e-02
  -8.4200000e-03
   5.4010000e-02
   5.1300000e-03
  -3.9260000e-02
   7.8690000e-02
  -1.0792000e-01
   9.6000000e-03
  -2.2950000e-02
  -1.1151000e-01
   2.5960000e-02
  -8.4690000e-02
   3.9500000e-03
   4.2280000e-02
   5.8620000e-02
   8.9100000e-03
  -3.9180000e-02
   3.7950000e-02
  -4.0630000e-02
   2.4590000e-02
  -3.9400000e-02
  -3.7510000e-02
  -3.1780000e-02
   9.1300000e-03
  -1.1650000e-02
   3.6800000e-02
  -1.6830000e-02
  -3.2350000e-02
   2.0650000e-02
  -7.0850000e-02
  -1.7800000e-03
  -3.2600000e-03
  -1.2580000e-02
   4.1570000e-02
   2.2210000e-02
   2.4870000e-02
   3.3700000e-03
   3.8900000e-03
  -9.7600000e-03
  -6.0980000e-02
   5.1330000e-02
  -9.3360000e-02
   3.2400000e-03
  -8.1200000e-03
  -9.1800000e-02
   7.6200000e-03
   5.6920000e-02
  -4.4390000e-02
  -7.2100000e-03
   3.5810000e-02
  -1.5631000e-01
   7.5890000e-02
   5.7960000e-02
  -4.8300000e-03
   1.5705000e-01
  -7.9730000e-02
  -7.0490000e-02
  -1.5600000e-03
  -1.7440000e-02
   9.2970000e-02
   8.5500000e-03
  -9.4040000e-02
  -2.8870000e-02
  -7.9100000e-02
   8.6560000e-02
  -1.6500000e-03
   5.4340000e-02
  -1.5900000e-03
  -5.9550000e-02
   6.6270000e-02
  -2.7660000e-02
  -1.5680000e-02
   4.5570000e-02
  -1.1100000e-02
   7.6800000e-03
   6.9750000e-02
  -5.8840000e-02
   4.1100000e-03
  -7.3180000e-02
  -6.8870000e-02
   1.8070000e-02
  -4.3590000e-02
  -9.6000000e-03
  -5.4000000e-03
  -8.1160000e-02
   2.9450000e-02
   3.1720000e-02
   2.8210000e-02
   5.3160000e-02
  -8.6750000e-02
   4.4090000e-02
  -2.3470000e-02
   2.5390000e-02
   6.9920000e-02
  -1.2939000e-01
   9.4810000e-02
  -7.2250000e-02
   3.4600000e-02
   5.1240000e-02
  -4.3100000e-02
   5.1660000e-02
  -6.3690000e-02
  -2.1800000e-02
  -4.3900000e-03
  -6.7480000e-02
   7.1730000e-02
   2.4760000e-02
  -3.4050000e-02
  -8.4200000e-03
  -3.1800000e-03
   1.6810000e-02
   4.9460000e-02
  -2.0230000e-02
  -8.1980000e-02
  -2.5200000e-02
  -3.8250000e-02
   1.0830000e-02
   3.5530000e-02
   1.9170000e-02
  -3.7260000e-02
  -4.2440000e-02
   4.9540000e-02
  -8.3540000e-02
   1.9190000e-02
  -2.4430000e-02
  -1.0076000e-01
   2.3300000e-03
   4.7430000e-02
  -3.2440000e-02
   7.1200000e-02
  -4.3540000e-02
  -2.7500000e-02
   1.9140000e-02
  -6.1880000e-02
   8.6280000e-02
  -3.7700000e-02
   9.3060000e-02
  -4.9410000e-02
  -3.0960000e-02
   4.0000000e-03
  -8.5050000e-02
   5.5930000e-02
  -9.2540000e-02
  -1.5960000e-02
   1.9990000e-02
  -3.1810000e-02
   8.4200000e-02
   5.5700000e-03
   1.0699000e-01
   5.4040000e-02
  -4.1620000e-02
  -2.6710000e-02
   3.8400000e-03
  -4.5790000e-02
   2.6950000e-02
  -7.0680000e-02
  -9.3610000e-02
   2.3830000e-02
  -5.8730000e-02
   5.8620000e-02
  -3.4710000e-02
   5.2100000e-03
   2.7200000e-02
  -3.9200000e-03
   6.7970000e-02
   6.4400000e-03
   2.5420000e-02
   7.8580000e-02
  -2.7700000e-03
  -6.0760000e-02
   1.6560000e-02
  -5.8040000e-02
  -9.5400000e-03
  -4.5380000e-02
  -2.9420000e-02
  -3.0130000e-02
  -1.5740000e-02
   4.9650000e-02
  -5.8810000e-02
   6.0050000e-02
  -2.6070000e-02
  -1.4010000e-02
   5.2230000e-02
  -6.2020000e-02
   1.0057000e-01
  -1.5550000e-02
  -5.6730000e-02
   1.1200000e-03
  -1.1148000e-01
  -1.7630000e-02
   1.7770000e-02
  -1.8890000e-02
   7.7000000e-04
  -9.5090000e-02
   7.8400000e-03
   5.1490000e-02
  -6.5670000e-02
   4.1370000e-02
  -1.1280000e-01
  -3.1090000e-02
   2.3770000e-02
  -1.6700000e-02
   7.0110000e-02
  -7.4140000e-02
   7.4740000e-02
  -3.8960000e-02
   4.4500000e-02
   1.6360000e-01
  -7.9870000e-02
   8.0390000e-02
  -8.2720000e-02
  -9.4700000e-02
   9.9310000e-02
  -3.9620000e-02
   3.4220000e-02
  -5.7170000e-02
  -9.1060000e-02
   2.2570000e-02
  -4.2420000e-02
   9.3060000e-02
  -2.7770000e-02
   8.0000000e-04
   5.3550000e-02
  -4.9430000e-02
   8.3050000e-02
  -2.8710000e-02
   2.2320000e-02
   1.9770000e-02
  -6.2240000e-02
  -2.5530000e-02
  -2.4370000e-02
  -7.0270000e-02
   2.3910000e-02
   7.0700000e-03
  -1.3364000e-01
   7.8880000e-02
  -5.1050000e-02
  -3.3610000e-02
   2.3770000e-02
  -5.0530000e-02
   1.4070000e-02
   3.5180000e-02
   5.9850000e-02
   5.1350000e-02
  -2.6300000e-03
   9.0210000e-02
  -8.3900000e-03
   6.2900000e-02
   1.7630000e-02
  -1.1200000e-01
  -2.5770000e-02
  -1.0265000e-01
  -3.4520000e-02
   1.7790000e-02
  -3.9240000e-02
  -6.1030000e-02
   1.9110000e-02
   3.5100000e-02
  -4.1650000e-02
   1.2045000e-01
   2.1140000e-02
  -6.9010000e-02
   1.6000000e-04
  -1.9820000e-02
   4.5000000e-03
   1.2459000e-01
  -1.3760000e-02
  -5.6950000e-02
  -3.5120000e-02
  -9.2730000e-02
  -1.8260000e-02
  -3.1810000e-02
  -3.1260000e-02
   9.7900000e-03
  -3.9150000e-02
  -5.8430000e-02
   5.8590000e-02
   2.1390000e-02
   2.8020000e-02
   2.8620000e-02
   8.4700000e-03
  -3.8500000e-02
   3.7800000e-03
   4.7050000e-02
  -5.3110000e-02
   5.4840000e-02
  -1.3400000e-03
  -9.5500000e-02
   5.5900000e-03
  -7.1400000e-02
  -6.8020000e-02
   1.5960000e-02
  -3.3700000e-03
  -2.0950000e-02
   1.3380000e-02
   1.6090000e-02
   1.4530000e-02
   9.1770000e-02
  -1.0830000e-02
   2.8870000e-02
  -6.5150000e-02
  -2.3390000e-02
  -4.9900000e-03
  -5.1660000e-02
   1.3783000e-01
  -9.0530000e-02
   3.5700000e-02
  -1.1820000e-02
  -1.1513000e-01
   7.6850000e-02
  -2.5390000e-02
   4.2960000e-02
  -3.8600000e-02
  -3.3150000e-02
   3.2520000e-02
   3.1750000e-02
   9.8180000e-02
  -6.2200000e-03
  -3.7230000e-02
   4.0030000e-02
  -5.2970000e-02
   2.0000000e-03
   7.0770000e-02
  -1.1214000e-01
   4.0770000e-02
  -4.9190000e-02
  -1.2292000e-01
   1.2623000e-01
  -8.7850000e-02
   2.3960000e-02
  -1.4780000e-02
  -9.3740000e-02
   6.9970000e-02
   2.3500000e-02
   5.4150000e-02
  -1.1730000e-02
  -6.4430000e-02
  -3.4300000e-02
  -5.0200000e-02
   1.1840000e-02
  -6.9340000e-02
  -2.4320000e-02
  -1.1490000e-02
  -2.0730000e-02
   2.3200000e-02
   3.1000000e-03
  -2.5580000e-02
  -1.3790000e-02
  -2.2370000e-02
  -5.8950000e-02
   9.8540000e-02
   3.7450000e-02
  -4.0880000e-02
   1.0844000e-01
  -3.1390000e-02
  -1.0010000e-02
   3.9540000e-02
  -8.0140000e-02
  -5.2420000e-02
  -3.7510000e-02
  -5.8840000e-02
   3.3700000e-03
   2.9690000e-02
   2.4350000e-02
  -2.2260000e-02
   7.4600000e-03
  -1.9580000e-02
  -3.8000000e-04
   1.0471000e-01
  -1.3000000e-02
  -2.7530000e-02
   4.3320000e-02
  -7.2110000e-02
   4.8150000e-02
   7.7100000e-02
  -4.5100000e-02
   2.8790000e-02
  -2.2540000e-02
  -1.4107000e-01
   8.8800000e-03
  -1.2910000e-02
  -8.4400000e-03
   6.9810000e-02
  -7.1860000e-02
  -4.4830000e-02
   4.9680000e-02
   3.4300000e-03
   3.8850000e-02
   3.6580000e-02
  -6.7910000e-02
  -3.1720000e-02
   1.2884000e-01
  -2.5470000e-02
   4.4690000e-02
   2.1910000e-02
  -1.4120000e-01
   1.1600000e-02
  -4.3320000e-02
  -3.4000000e-03
   3.8960000e-02
  -3.4630000e-02
  -5.6370000e-02
   1.9740000e-02
  -3.4740000e-02
   6.6960000e-02
   3.5840000e-02
  -3.6500000e-03
  -4.2850000e-02
  -8.0060000e-02
   1.5880000e-02
  -5.6810000e-02
   1.2588000e-01
  -2.5010000e-02
  -5.4530000e-02
   1.3700000e-03
  -1.1315000e-01
   1.0232000e-01
   1.4260000e-02
  -2.9690000e-02
  -3.5670000e-02
   1.5980000e-02
  -1.5740000e-02
   4.1430000e-02
   4.3760000e-02
  -1.1060000e-01
   1.0296000e-01
  -1.1406000e-01
  -3.5290000e-02
   2.0070000e-02
  -8.7220000e-02
   5.3220000e-02
   3.7430000e-02
   1.4700000e-02
  -4.0610000e-02
   5.1460000e-02
  -5.8840000e-02
   1.8700000e-02
   5.8950000e-02
  -6.7700000e-02
   7.4900000e-03
  -3.2680000e-02
   2.4700000e-03
   5.3220000e-02
  -4.9050000e-02
   4.1400000e-02
  -9.4670000e-02
  -3.6770000e-02
  -6.2200000e-03
  -2.7000000e-04
   7.0220000e-02
  -1.9990000e-02
  -5.7660000e-02
   4.1700000e-02
  -2.6430000e-02
   3.5510000e-02
   8.1730000e-02
  -6.5910000e-02
  -1.6200000e-03
  -1.2420000e-02
  -3.7400000e-02
   4.8800000e-02
   6.6020000e-02
  -4.8230000e-02
   1.1430000e-02
  -1.6730000e-02
  -9.5400000e-03
   4.7540000e-02
  -1.6420000e-02
   1.6290000e-02
  -6.2680000e-02
  -3.3780000e-02
  -4.1000000e-04
  -5.2900000e-03
   3.7780000e-02
  -1.6590000e-02
  -4.4170000e-02
   2.5200000e-03
  -3.9950000e-02
   2.4180000e-02
   5.8260000e-02
   2.6810000e-02
   8.2500000e-03
  -5.1330000e-02
  -5.8400000e-02
  -2.8210000e-02
  -2.1610000e-02
  -2.5550000e-02
  -3.1150000e-02
  -2.3690000e-02
   2.2500000e-03
   1.6180000e-02
  -3.1000000e-03
   2.7500000e-02
   2.8380000e-02
   8.4200000e-03
   6.6790000e-02
  -6.0350000e-02
  -2.1800000e-02
   1.8970000e-02
  -6.4980000e-02
  -1.2910000e-02
  -2.7060000e-02
  -3.4930000e-02
   1.2200000e-02
  -1.7030000e-02
   6.2000000e-03
  -4.5790000e-02
   7.7600000e-03
   3.5840000e-02
  -3.7180000e-02
   4.3240000e-02
  -6.4430000e-02
   1.6310000e-02
   5.8730000e-02
   4.4310000e-02
   4.8390000e-02
  -1.2200000e-02
  -9.2320000e-02
  -4.6670000e-02
  -5.3770000e-02
   5.6200000e-03
   2.6870000e-02
  -3.7040000e-02
  -6.8710000e-02
  -2.3610000e-02
  -6.6600000e-03
  -2.6300000e-03
   2.2290000e-02
  -6.3300000e-03
  -2.8600000e-02
   6.3990000e-02
   6.1470000e-02
  -1.4120000e-02
   7.4740000e-02
  -3.7970000e-02
   8.6100000e-03
   1.2023000e-01
  -5.1080000e-02
   3.4350000e-02
  -5.2590000e-02
  -6.7010000e-02
  -7.5840000e-02
  -5.2230000e-02
  -3.9480000e-02
   2.1400000e-03
   1.0280000e-02
  -5.2810000e-02
   2.7660000e-02
  -1.3700000e-03
   2.7530000e-02
   3.8470000e-02
  -3.9020000e-02
   4.0960000e-02
  -4.3600000e-03
   3.3700000e-03
   1.4390000e-02
  -4.0300000e-03
   1.6730000e-02
  -3.6930000e-02
   4.9650000e-02
  -5.7190000e-02
  -2.9860000e-02
  -1.2800000e-02
  -5.0230000e-02
   2.3030000e-02
  -1.7300000e-03
  -2.5940000e-02
  -6.7200000e-03
  -3.5600000e-03
   2.5960000e-02
   5.8620000e-02
   4.6280000e-02
   2.0810000e-02
  -2.1930000e-02
  -3.2760000e-02
  -2.4180000e-02
   1.3350000e-02
  -8.3100000e-03
  -5.4670000e-02
  -4.3130000e-02
  -5.7500000e-02
   2.6490000e-02
   6.7400000e-03
   1.7190000e-02
   1.7680000e-02
  -7.4990000e-02
   1.2640000e-02
   7.3500000e-03
  -6.4400000e-03
   1.2777000e-01
  -1.3490000e-01
   2.0540000e-02
   1.8890000e-02
  -4.6640000e-02
   1.1025000e-01
  -4.3380000e-02
  -5.1050000e-02
   5.1110000e-02
  -3.4190000e-02
   4.9600000e-03
   4.8890000e-02
  -7.9290000e-02
   3.1810000e-02
  -9.3610000e-02
  -5.3600000e-02
  -5.7250000e-02
  -5.0400000e-03
   7.3230000e-02
  -3.3700000e-03
   1.9250000e-02
   2.3800000e-02
   5.7220000e-02
   5.4950000e-02
   6.7480000e-02
  -1.2260000e-02
  -4.9350000e-02
  -3.2240000e-02
  -1.5850000e-02
   1.0390000e-02
  -4.5190000e-02
  -9.6000000e-03
  -8.1160000e-02
  -1.8810000e-02
   4.8610000e-02
  -6.9400000e-02
   4.0140000e-02
   8.7700000e-03
  -3.2050000e-02
   7.8470000e-02
  -5.5400000e-03
   1.3960000e-02
   7.0140000e-02
  -5.7580000e-02
   5.0310000e-02
  -5.7610000e-02
  -3.3260000e-02
   1.1710000e-02
  -3.9450000e-02
   4.6140000e-02
  -5.1000000e-02
  -4.1430000e-02
  -2.3800000e-02
  -4.4990000e-02
  -3.3000000e-04
   3.4740000e-02
  -5.5080000e-02
   3.6110000e-02
  -5.7990000e-02
   5.7800000e-02
  -8.6100000e-03
   6.0510000e-02
  -2.5960000e-02
   1.4970000e-02
   1.9820000e-02
  -9.2700000e-02
   2.7120000e-02
  -1.9800000e-02
  -3.1170000e-02
   7.9000000e-03
  -4.1370000e-02
   1.3710000e-02
   2.4400000e-03
   2.1190000e-02
  -2.4400000e-02
  -1.8890000e-02
   5.1660000e-02
   1.8810000e-02
   1.8510000e-02
   3.1260000e-02
  -3.0870000e-02
  -3.3120000e-02
   2.7030000e-02
  -4.6090000e-02
  -2.2950000e-02
  -5.3600000e-02
  -1.1579000e-01
   2.4350000e-02
   3.5700000e-02
  -5.7000000e-03
   5.1240000e-02
  -2.1100000e-03
  -5.6650000e-02
   3.2240000e-02
   7.9240000e-02
  -3.9400000e-02
   6.3580000e-02
  -2.8380000e-02
  -1.2763000e-01
   5.3380000e-02
  -5.7470000e-02
   1.0400000e-03
   1.7190000e-02
  -2.6050000e-02
  -1.3850000e-02
   2.7660000e-02
  -2.1110000e-02
   3.2110000e-02
   8.8000000e-04
   2.6180000e-02
   8.6420000e-02
  -1.6700000e-02
   7.1000000e-03
  -3.3610000e-02
  -2.1580000e-02
   5.1330000e-02
  -3.6050000e-02
  -2.3200000e-02
  -4.5290000e-02
  -7.0880000e-02
   6.0900000e-02
  -4.1150000e-02
   3.1480000e-02
   6.0650000e-02
  -5.6230000e-02
   5.0720000e-02
  -5.0500000e-02
   8.7200000e-03
   3.0380000e-02
   4.1700000e-02
  -5.1900000e-02
  -1.5050000e-02
  -2.7990000e-02
  -1.9690000e-02
   4.4090000e-02
  -2.4680000e-02
   1.7520000e-02
  -9.7900000e-03
   4.1700000e-03
  -2.6240000e-02
   1.4560000e-02
  -6.8300000e-03
   4.7870000e-02
  -6.3560000e-02
  -8.2500000e-03
  -5.5910000e-02
   2.9060000e-02
   7.6880000e-02
  -6.9230000e-02
   3.0270000e-02
  -8.2830000e-02
   1.2860000e-02
   7.3200000e-03
  -4.0740000e-02
   1.1950000e-02
  -2.7500000e-02
  -1.8420000e-02
  -1.5030000e-02
  -2.3940000e-02
   4.8610000e-02
   7.3500000e-03
  -4.5290000e-02
   6.8500000e-03
  -3.6880000e-02
  -4.2610000e-02
   3.0130000e-02
  -3.9670000e-02
   9.3800000e-03
   8.0660000e-02
  -4.0300000e-02
   3.4350000e-02
   2.6710000e-02
  -3.0020000e-02
   2.5010000e-02
  -5.1630000e-02
  -3.9810000e-02
   5.9610000e-02
   9.4300000e-03
   3.2050000e-02
  -2.5010000e-02
  -3.7230000e-02
   2.1500000e-02
   1.4640000e-02
   8.7080000e-02
   3.8280000e-02
  -4.0880000e-02
  -2.5860000e-02
  -9.1190000e-02
   5.3580000e-02
  -1.3700000e-03
  -4.4400000e-03
  -1.5680000e-02
  -6.6160000e-02
  -2.1700000e-03
   4.3490000e-02
   1.8100000e-02
   1.6590000e-02
   4.0300000e-02
  -6.3940000e-02
   2.8020000e-02
   3.4050000e-02
  -8.7790000e-02
   7.3540000e-02
  -1.0720000e-01
  -2.4480000e-02
   8.1700000e-03
  -7.8830000e-02
   3.5590000e-02
   1.4070000e-02
  -3.1970000e-02
   1.5960000e-02
   6.0300000e-03
   2.1250000e-02
   1.9250000e-02
   2.6920000e-02
   4.3900000e-03
  -1.2230000e-02
   6.3600000e-03
   5.1800000e-03
  -1.0390000e-02
  -1.4810000e-02
  -4.0880000e-02
  -1.0699000e-01
  -4.1700000e-03
  -2.4460000e-02
  -1.8450000e-02
   8.9700000e-03
  -5.2860000e-02
  -1.3430000e-02
   7.6910000e-02
   2.5800000e-03
   2.0730000e-02
   7.9100000e-02
  -4.4310000e-02
   2.5360000e-02
  -1.9470000e-02
  -9.2970000e-02
   3.0130000e-02
  -3.3260000e-02
  -3.7210000e-02
   2.3000000e-03
  -6.3640000e-02
   4.6230000e-02
   7.0700000e-03
   7.7000000e-04
   1.8620000e-02
  -4.0300000e-03
   2.1660000e-02
  -2.2460000e-02
  -3.0400000e-03
  -1.0640000e-02
   1.7740000e-02
   5.8070000e-02
   2.7940000e-02
  -2.8050000e-02
  -1.0750000e-02
  -6.8790000e-02
   5.1380000e-02
  -2.4650000e-02
  -9.1300000e-03
   2.6600000e-02
  -4.1950000e-02
   2.6290000e-02
   6.1530000e-02
  -3.1420000e-02
   5.1550000e-02
   2.6790000e-02
  -8.5350000e-02
  -9.1000000e-03
  -5.5250000e-02
   6.3100000e-03
  -3.8930000e-02
   1.9580000e-02
  -4.9520000e-02
  -1.2340000e-02
   6.5860000e-02
  -7.7480000e-02
   6.2350000e-02
   1.5000000e-02
  -3.8440000e-02
   1.7550000e-02
   4.6300000e-03
  -3.4000000e-03
   5.4340000e-02
   2.3990000e-02
  -9.6460000e-02
   4.8010000e-02
  -1.5270000e-02
  -4.8390000e-02
   8.7080000e-02
  -1.0186000e-01
  -3.7340000e-02
   8.4830000e-02
  -9.0950000e-02
   7.5760000e-02
   2.1330000e-02
  -9.4650000e-02
   3.8000000e-02
   3.5100000e-03
  -6.4300000e-02
   5.3660000e-02
  -1.1600000e-02
  -5.4400000e-02
   3.7430000e-02
   1.3000000e-02
  -2.2260000e-02
   1.7550000e-02
  -5.6870000e-02
  -3.8880000e-02
   3.9150000e-02
  -3.9290000e-02
   2.1740000e-02
  -3.9370000e-02
   1.7440000e-02
  -1.2280000e-02
   2.5990000e-02
   4.3980000e-02
  -8.6480000e-02
   4.4100000e-03
  -1.5680000e-02
  -6.3900000e-03
   6.8680000e-02
  -1.4560000e-02
  -3.4680000e-02
  -3.1450000e-02
  -2.6760000e-02
   3.6580000e-02
   3.8710000e-02
  -5.7900000e-03
  -1.4920000e-02
  -7.1310000e-02
   3.6330000e-02
   3.1000000e-03
   2.8930000e-02
   3.4990000e-02
  -3.5230000e-02
  -1.7990000e-02
  -2.4700000e-02
  -7.6500000e-03
  -1.2340000e-02
   2.1900000e-03
   1.9800000e-02
   2.5880000e-02
   8.8300000e-03
   9.6240000e-02
  -2.0100000e-02
  -9.2400000e-03
  -1.0670000e-02
  -2.8100000e-02
   1.9330000e-02
  -1.8260000e-02
  -1.7140000e-02
  -5.5380000e-02
  -4.0660000e-02
   3.4570000e-02
  -3.7070000e-02
   4.5950000e-02
  -3.8900000e-03
  -8.3190000e-02
   1.8950000e-02
   8.7700000e-03
   3.4600000e-02
  -3.4930000e-02
   2.2810000e-02
  -3.7700000e-02
   1.1300000e-02
   6.5200000e-02
  -4.2500000e-02
   1.7740000e-02
  -1.0641000e-01
   3.2080000e-02
  -5.6800000e-03
  -1.2390000e-02
   4.5870000e-02
  -7.2000000e-02
  -6.9860000e-02
   3.0930000e-02
  -3.1060000e-02
  -1.6970000e-02
   3.8360000e-02
  -4.0190000e-02
   2.9580000e-02
  -2.7090000e-02
  -4.6100000e-03
   8.1350000e-02
  -3.2300000e-02
   2.4020000e-02
  -1.4890000e-02
  -8.7740000e-02
   1.7740000e-02
  -4.0300000e-03
  -9.2370000e-02
   7.2360000e-02
  -7.0790000e-02
  -1.2900000e-03
   7.0050000e-02
  -6.3640000e-02
   1.0312000e-01
  -4.1790000e-02
  -1.4180000e-02
   5.8460000e-02
  -6.1720000e-02
   7.0050000e-02
   2.4510000e-02
  -6.4510000e-02
   7.8530000e-02
  -2.1300000e-02
   6.7810000e-02
  -2.6100000e-02
  -6.2920000e-02
   2.4870000e-02
  -1.2108000e-01
   7.9350000e-02
  -7.4930000e-02
  -8.8750000e-02
   3.0270000e-02
  -1.0194000e-01
   8.7440000e-02
   2.8430000e-02
  -6.0050000e-02
   9.1740000e-02
  -8.5000000e-04
   8.4480000e-02
   7.8720000e-02
  -7.5870000e-02
   4.1180000e-02
  -6.1990000e-02
   1.1500000e-03
   4.3900000e-03
  -7.1860000e-02
  -1.8230000e-02
  -9.1300000e-02
   2.6810000e-02
   1.4010000e-02
  -2.5170000e-02
   1.0622000e-01
  -8.0830000e-02
   1.4390000e-02
   2.7450000e-02
   1.3270000e-02
   6.8490000e-02
  -4.4200000e-02
   5.8350000e-02
  -2.7940000e-02
  -5.3700000e-03
   6.9700000e-02
  -1.9900000e-01
   5.0720000e-02
  -5.4070000e-02
  -8.7220000e-02
   7.5590000e-02
  -8.3870000e-02
   2.7910000e-02
   4.3650000e-02
   2.1700000e-03
  -5.5400000e-03
   2.3420000e-02
   5.5360000e-02
  -5.9330000e-02
   2.5640000e-02
  -4.6390000e-02
  -1.2662000e-01
   7.1590000e-02
  -5.7060000e-02
   1.7800000e-03
   4.7490000e-02
  -9.2040000e-02
  -1.4700000e-02
   5.1300000e-03
  -3.4050000e-02
   8.9410000e-02
   1.9440000e-02
  -2.7200000e-02
   4.8800000e-03
  -2.6710000e-02
  -2.4570000e-02
   3.9240000e-02
  -5.8020000e-02
  -4.3570000e-02
   1.8180000e-02
  -6.2500000e-03
   4.2640000e-02
   8.0200000e-02
  -4.4700000e-03
   4.2200000e-03
   2.7640000e-02
  -3.5040000e-02
   1.2230000e-02
   3.2710000e-02
  -7.7510000e-02
   6.7150000e-02
   2.7860000e-02
  -2.7280000e-02
   3.7320000e-02
  -6.2400000e-02
  -7.4990000e-02
   1.9330000e-02
   2.7400000e-03
   1.7470000e-02
   9.0950000e-02
  -5.7610000e-02
   5.6020000e-02
  -9.3000000e-04
   1.6400000e-02
   3.8220000e-02
  -3.7840000e-02
  -4.7820000e-02
  -4.9220000e-02
  -1.1190000e-02
   3.9350000e-02
   1.4530000e-02
  -3.0430000e-02
  -1.4590000e-02
  -7.9270000e-02
   3.3500000e-02
   5.3960000e-02
  -1.0530000e-02
   1.6290000e-02
  -9.0560000e-02
   7.2690000e-02
   2.4790000e-02
   1.8100000e-02
   2.4620000e-02
  -1.4238000e-01
  -1.5080000e-02
  -9.7800000e-02
  -5.3250000e-02
   1.1080000e-02
   9.0000000e-04
   3.3560000e-02
  -5.0640000e-02
   3.7920000e-02
   3.7150000e-02
   3.6110000e-02
   8.5930000e-02
  -6.4430000e-02
  -7.6910000e-02
  -2.6920000e-02
  -4.5510000e-02
   8.4390000e-02
  -1.6620000e-02
  -7.2400000e-03
   7.4000000e-03
  -9.3080000e-02
   1.0830000e-02
  -3.8660000e-02
  -1.7660000e-02
   1.8600000e-03
  -3.8000000e-04
  -1.5050000e-02
  -1.9850000e-02
   8.1290000e-02
   1.7410000e-02
  -3.2710000e-02
   5.7000000e-03
  -8.5350000e-02
  -2.7750000e-02
   1.4890000e-02
  -6.4080000e-02
  -1.6000000e-04
  -5.4180000e-02
  -1.7820000e-02
   1.7850000e-02
  -3.1530000e-02
   3.3230000e-02
   5.1800000e-03
  -4.2880000e-02
   4.2200000e-03
   1.5880000e-02
   5.6650000e-02
   7.0460000e-02
   9.2700000e-03
   2.2590000e-02
   2.4480000e-02
  -4.0300000e-03
  -1.1000000e-04
  -3.5100000e-02
  -4.8940000e-02
   1.1790000e-02
   3.5900000e-03
  -5.3080000e-02
   3.5920000e-02
  -2.8620000e-02
   1.4830000e-02
   4.0300000e-03
  -1.8810000e-02
  -6.2500000e-03
   2.3550000e-02
   4.4340000e-02
  -1.2900000e-03
   6.5420000e-02
   3.1750000e-02
  -3.6700000e-03
   3.6140000e-02
   2.8050000e-02
  -1.0280000e-02
  -3.7000000e-03
  -8.1930000e-02
   1.0560000e-02
  -1.1570000e-02
  -2.1500000e-02
   2.0100000e-02
  -1.0907000e-01
  -9.9800000e-03
   6.4700000e-03
  -2.2460000e-02
   1.0446000e-01
  -5.6430000e-02
   3.3860000e-02
  -2.5010000e-02
  -3.3940000e-02
   3.1830000e-02
  -2.7660000e-02
  -2.5660000e-02
  -8.0420000e-02
  -1.8700000e-02
  -9.3170000e-02
   2.1910000e-02
  -1.1160000e-02
  -5.1050000e-02
   4.1650000e-02
  -3.4740000e-02
   3.5920000e-02
   1.8730000e-02
  -2.5360000e-02
   1.2060000e-02
  -9.0890000e-02
   3.4000000e-03
   2.2870000e-02
   3.7000000e-03
   9.7550000e-02
  -6.0540000e-02
  -5.0090000e-02
   2.8050000e-02
  -9.5520000e-02
   6.8870000e-02
  -2.0920000e-02
  -2.2810000e-02
   6.8190000e-02
  -4.4250000e-02
   8.7880000e-02
   7.6200000e-03
  -4.3730000e-02
   5.7770000e-02
  -8.9050000e-02
   1.8480000e-02
   3.6700000e-03
  -1.1236000e-01
  -7.0500000e-03
  -3.2020000e-02
   4.6910000e-02
   5.8430000e-02
   2.7200000e-02
   3.5840000e-02
   1.5080000e-02
   2.4620000e-02
   3.7370000e-02
   3.0400000e-03
  -3.4080000e-02
   6.0590000e-02
  -5.2780000e-02
  -6.2790000e-02
  -3.8390000e-02
  -5.6510000e-02
  -1.5270000e-02
   1.9410000e-02
  -1.0470000e-02
  -2.6950000e-02
   9.3470000e-02
   1.3350000e-02
   3.0820000e-02
   6.4320000e-02
  -3.4000000e-02
   5.3200000e-03
  -3.0000000e-05
  -3.4250000e-02
  -1.7800000e-03
   4.1400000e-03
  -3.1120000e-02
   7.8400000e-03
  -6.7400000e-03
  -3.0190000e-02
  -4.5820000e-02
  -8.0310000e-02
  -1.5130000e-02
   4.6910000e-02
   5.1500000e-03
   5.1050000e-02
   9.1000000e-03
  -7.8100000e-03
  -4.2200000e-03
   3.5400000e-02
   9.5400000e-03
  -5.8510000e-02
   1.8040000e-02
  -4.8890000e-02
  -1.9490000e-02
  -5.6620000e-02
   1.1160000e-02
  -1.8590000e-02
  -1.8400000e-02
   3.5040000e-02
  -1.9820000e-02
  -5.7300000e-03
   7.8400000e-03
   9.3200000e-03
   4.1370000e-02
   6.7940000e-02
  -8.0300000e-03
  -2.3090000e-02
  -8.0860000e-02
  -4.2550000e-02
  -2.6870000e-02
  -3.4080000e-02
  -4.0940000e-02
  -7.8990000e-02
   2.8760000e-02
  -7.4330000e-02
   1.2170000e-02
   7.2110000e-02
  -4.3790000e-02
   1.2154000e-01
  -1.6670000e-02
  -1.3760000e-02
   2.4700000e-03
   5.3220000e-02
  -4.4700000e-03
   3.8550000e-02
  -5.7660000e-02
  -6.3140000e-02
   1.2150000e-02
  -2.5580000e-02
  -8.9160000e-02
   1.8100000e-03
  -8.2640000e-02
   3.8930000e-02
   8.1950000e-02
  -5.5820000e-02
   9.6510000e-02
  -6.9400000e-02
   6.3600000e-03
   5.3050000e-02
   4.3790000e-02
   6.9750000e-02
  -4.6140000e-02
   1.7960000e-02
  -3.5670000e-02
  -5.9390000e-02
   1.2982000e-01
  -8.7080000e-02
   3.4520000e-02
   1.6590000e-02
  -1.6253000e-01
   6.5390000e-02
  -9.0500000e-03
   2.3090000e-02
   3.9510000e-02
  -1.8840000e-02
   1.7000000e-03
  -2.2670000e-02
   5.6920000e-02
  -1.5080000e-02
  -5.4000000e-03
   2.8490000e-02
  -1.4010000e-02
  -3.1310000e-02
  -2.4050000e-02
  -3.2680000e-02
  -9.5830000e-02
   4.6750000e-02
  -6.7340000e-02
   1.8640000e-02
  -1.2200000e-02
  -1.5930000e-02
  -2.0590000e-02
  -2.5140000e-02
  -3.2740000e-02
   2.7530000e-02
   7.3400000e-02
   7.3800000e-03
  -3.9480000e-02
  -2.1170000e-02
   2.6620000e-02
   3.1260000e-02
  -1.1190000e-02
   8.5300000e-03
  -1.0482000e-01
   3.4740000e-02
  -4.5190000e-02
  -1.0390000e-02
  -8.2300000e-03
  -6.9290000e-02
   7.9180000e-02
  -5.3440000e-02
  -3.0630000e-02
   7.1560000e-02
  -1.4444000e-01
   1.5549000e-01
  -1.5820000e-02
   2.2500000e-03
   1.1650000e-02
  -2.7010000e-02
   5.0920000e-02
   3.1560000e-02
   6.3030000e-02
  -6.5890000e-02
  -1.5770000e-02
  -8.1730000e-02
  -1.9520000e-02
   4.9960000e-02
   5.9800000e-03
  -2.4430000e-02
  -1.7000000e-03
  -3.5420000e-02
  -2.7170000e-02
   4.9270000e-02
  -1.0970000e-02
   9.4600000e-03
   2.7940000e-02
   1.1380000e-02
   6.2200000e-03
   6.0180000e-02
   5.9200000e-03
  -1.6340000e-02
  -8.8230000e-02
  -4.4550000e-02
  -6.7010000e-02
  -6.1200000e-02
  -2.0890000e-02
   2.6730000e-02
  -7.9100000e-02
   7.1100000e-02
   7.1890000e-02
  -2.7420000e-02
   8.6040000e-02
  -8.5520000e-02
   2.1220000e-02
   9.6000000e-04
   3.1780000e-02
   3.8580000e-02
  -5.1050000e-02
  -1.1930000e-02
  -6.5390000e-02
   1.6200000e-03
  -1.8150000e-02
  -2.2650000e-02
  -4.9520000e-02
  -1.2010000e-02
  -1.5350000e-02
   6.5000000e-03
   4.0170000e-02
  -1.6730000e-02
   1.2150000e-02
  -1.5160000e-02
  -2.9580000e-02
   7.4900000e-03
   5.0200000e-03
   4.0170000e-02
   3.6600000e-02
  -2.5640000e-02
   1.2670000e-02
   5.1500000e-03
   3.4680000e-02
   1.2390000e-02
  -4.1430000e-02
  -4.4750000e-02
  -9.7330000e-02
  -2.8300000e-02
  -3.4000000e-03
  -3.9540000e-02
   3.6440000e-02
  -2.7420000e-02
  -6.7590000e-02
   8.3630000e-02
  -9.5400000e-03
   2.3440000e-02
   8.7980000e-02
  -2.3330000e-02
  -1.4230000e-02
   2.0210000e-02
   1.3050000e-02
  -8.2750000e-02
  -7.4300000e-03
  -1.1500000e-03
  -9.6510000e-02
   2.9560000e-02
  -9.8600000e-02
  -3.3530000e-02
   1.0948000e-01
  -4.7520000e-02
   6.3230000e-02
   4.3460000e-02
  -1.7930000e-02
   9.4480000e-02
   4.6580000e-02
  -5.9140000e-02
   5.3700000e-03
  -4.6530000e-02
  -1.1899000e-01
   6.0590000e-02
  -7.5180000e-02
  -1.6810000e-02
   8.9100000e-03
  -7.8770000e-02
   2.7120000e-02
  -4.3980000e-02
   4.0090000e-02
   1.2060000e-02
   3.9180000e-02
   4.5710000e-02
  -6.2570000e-02
   6.3770000e-02
   1.1320000e-02
  -3.5840000e-02
   6.9940000e-02
  -5.7000000e-02
  -5.4840000e-02
   6.2600000e-02
  -1.5203000e-01
   2.7940000e-02
   6.0700000e-02
  -7.6250000e-02
   1.3594000e-01
  -1.1721000e-01
  -1.7220000e-02
   5.7850000e-02
  -2.5610000e-02
   1.0027000e-01
  -5.9060000e-02
   1.7270000e-02
  -6.6600000e-03
  -5.0590000e-02
   8.6610000e-02
  -9.3930000e-02
  -8.8000000e-04
  -8.9700000e-03
  -1.5244000e-01
  -2.5000000e-04
  -2.3060000e-02
   1.9630000e-02
   2.7580000e-02
   1.1520000e-02
   1.3850000e-02
  -2.8800000e-03
   6.5970000e-02
  -1.6940000e-02
   2.0020000e-02
  -8.6900000e-03
  -3.7840000e-02
  -2.5660000e-02
   3.8170000e-02
  -4.8170000e-02
   4.5190000e-02
   1.5400000e-03
  -1.2069000e-01
   3.8630000e-02
  -1.1222000e-01
  -2.3300000e-03
   4.5790000e-02
  -2.0230000e-02
   2.7860000e-02
   1.3240000e-02
  -1.9990000e-02
   5.5710000e-02
   6.6850000e-02
   2.4460000e-02
   3.7040000e-02
  -5.3630000e-02
  -1.8370000e-02
  -1.9600000e-02
  -4.7200000e-03
  -7.2900000e-03
   5.8900000e-03
  -6.3690000e-02
  -5.7930000e-02
   2.2700000e-02
  -3.2900000e-02
   5.1130000e-02
   2.6570000e-02
   1.0010000e-02
  -4.6670000e-02
  -2.5010000e-02
   5.1380000e-02
  -2.6490000e-02
   5.4260000e-02
   1.5630000e-02
  -4.3320000e-02
   2.8350000e-02
  -9.1660000e-02
   4.0520000e-02
   3.5920000e-02
   5.3710000e-02
  -1.7030000e-02
  -1.0271000e-01
  -7.5510000e-02
   6.5300000e-03
   6.0950000e-02
  -5.9220000e-02
   1.4340000e-02
  -1.1162000e-01
   8.2500000e-03
   7.1230000e-02
  -2.4950000e-02
  -1.1300000e-02
   4.4390000e-02
  -8.5080000e-02
   7.5130000e-02
  -3.5100000e-03
  -3.7700000e-02
   5.8020000e-02
  -7.3100000e-02
  -4.4830000e-02
  -2.0020000e-02
  -3.7800000e-03
  -1.4720000e-02
   7.1530000e-02
  -5.9830000e-02
   4.4100000e-03
   2.9530000e-02
  -3.4790000e-02
   6.7390000e-02
   5.8650000e-02
   5.3500000e-03
  -3.2960000e-02
   4.8800000e-02
  -5.5060000e-02
   5.3250000e-02
   1.2890000e-02
  -7.7130000e-02
  -1.1000000e-03
  -6.8410000e-02
  -1.3400000e-03
   3.8280000e-02
  -6.3340000e-02
   1.0450000e-02
  -1.6830000e-02
   1.9080000e-02
   1.0509000e-01
   2.1400000e-03
  -3.0700000e-03
   2.7340000e-02
  -2.3090000e-02
   6.8500000e-03
   1.3630000e-02
  -1.0748000e-01
  -8.3900000e-02
   5.2000000e-04
  -1.2242000e-01
   3.2960000e-02
  -5.1500000e-03
  -4.5710000e-02
   6.1660000e-02
  -3.6800000e-02
  -1.3220000e-02
   6.4650000e-02
   5.1350000e-02
  -2.9580000e-02
   7.9540000e-02
  -7.7210000e-02
   1.3410000e-02
   1.2280000e-02
  -2.3440000e-02
   2.2350000e-02
  -9.8600000e-02
   3.9260000e-02
  -6.3420000e-02
   2.4680000e-02
  -2.9420000e-02
  -5.2510000e-02
   4.5050000e-02
  -6.7010000e-02
   4.7980000e-02
  -6.8800000e-03
  -2.9900000e-03
   1.4093000e-01
   5.4300000e-03
   7.1840000e-02
  -5.6500000e-03
  -6.1910000e-02
   6.9420000e-02
  -1.0723000e-01
  -4.2200000e-03
  -5.7280000e-02
  -1.0326000e-01
   1.5710000e-02
  -6.0810000e-02
  -1.5740000e-02
   1.0120000e-02
  -4.6530000e-02
   6.1750000e-02
  -1.5490000e-02
   8.4610000e-02
   2.7420000e-02
  -2.9750000e-02
   7.2630000e-02
  -4.8010000e-02
   1.0337000e-01
   5.4320000e-02
  -1.4920000e-02
  -4.7700000e-03
  -1.4257000e-01
  -2.4840000e-02
   4.2090000e-02
  -1.0550000e-01
  -9.8700000e-03
  -1.1740000e-01
  -1.1570000e-01
   8.1980000e-02
  -2.1060000e-02
   6.8270000e-02
   3.1560000e-02
  -6.8020000e-02
   5.9440000e-02
   6.3360000e-02
   5.2940000e-02
   4.9820000e-02
  -3.7290000e-02
  -9.0590000e-02
  -2.4430000e-02
  -1.3200000e-03
  -1.4340000e-02
   2.7970000e-02
  -6.3610000e-02
  -4.1350000e-02
  -7.8400000e-03
   2.9800000e-02
   2.1580000e-02
   1.4070000e-02
  -4.3020000e-02
  -8.4340000e-02
   5.7910000e-02
   2.5500000e-03
   8.0690000e-02
   3.4570000e-02
  -5.0500000e-02
   1.2580000e-02
  -6.4490000e-02
   6.3250000e-02
   1.7000000e-03
  -5.6430000e-02
   1.3240000e-02
  -1.1324000e-01
   3.1060000e-02
  -2.9860000e-02
  -1.1840000e-02
   4.1260000e-02
  -2.9200000e-02
   1.8780000e-02
  -4.8010000e-02
   4.3650000e-02
   2.8460000e-02
  -1.2830000e-02
  -1.0640000e-02
  -3.7510000e-02
  -4.8690000e-02
   2.7030000e-02
   2.1520000e-02
  -7.4440000e-02
   5.4070000e-02
  -5.2400000e-02
   2.4730000e-02
   9.8760000e-02
  -5.3500000e-03
   1.0581000e-01
  -7.6660000e-02
  -1.4500000e-02
  -7.3450000e-02
  -1.6070000e-02
   8.5080000e-02
  -9.7660000e-02
  -1.5300000e-02
  -3.4000000e-02
  -2.8760000e-02
   1.7043000e-01
  -1.2910000e-02
  -1.0800000e-02
   3.8550000e-02
  -6.9090000e-02
   3.8990000e-02
   2.4510000e-02
  -3.6520000e-02
   4.5290000e-02
  -7.2300000e-02
  -7.9100000e-02
   6.2000000e-03
  -2.2840000e-02
   2.5000000e-03
  -6.8300000e-03
   4.5210000e-02
  -5.1660000e-02
  -2.0920000e-02
   6.8080000e-02
  -5.2530000e-02
   9.0920000e-02
  -1.6480000e-02
  -7.7590000e-02
   3.9810000e-02
  -6.3360000e-02
   5.1930000e-02
   3.2740000e-02
  -4.0060000e-02
   5.8900000e-03
  -8.0200000e-02
  -1.7000000e-02
   8.6670000e-02
  -5.5140000e-02
   5.6800000e-03
  -1.5570000e-02
  -1.4038000e-01
   7.5950000e-02
   3.9800000e-03
   1.3870000e-02
   9.3960000e-02
  -5.3600000e-02
   1.0310000e-02
  -6.1700000e-03
  -5.9360000e-02
  -2.8490000e-02
  -3.0980000e-02
   1.7030000e-02
  -5.7060000e-02
   5.0230000e-02
  -1.8480000e-02
  -1.3870000e-02
   5.8130000e-02
  -1.3150000e-01
   2.8540000e-02
   2.3660000e-02
   1.0470000e-02
   9.3330000e-02
  -2.8200000e-03
  -4.2910000e-02
   4.1100000e-02
  -5.9420000e-02
   3.8400000e-03
   6.7200000e-03
  -6.5170000e-02
  -7.8200000e-02
   5.5000000e-04
   2.3910000e-02
   2.2350000e-02
   6.6240000e-02
  -1.4720000e-02
  -2.1100000e-03
   1.0030000e-01
   7.6800000e-03
   6.9000000e-04
   1.9000000e-02
  -1.3709000e-01
   2.0020000e-02
   6.8000000e-03
  -3.5860000e-02
   1.2453000e-01
  -7.8420000e-02
  -8.8510000e-02
  -2.9690000e-02
  -5.5930000e-02
   2.8650000e-02
   1.0153000e-01
  -2.5330000e-02
  -1.8890000e-02
   4.9570000e-02
  -6.3970000e-02
   5.5000000e-02
   5.4750000e-02
  -6.7610000e-02
  -2.8650000e-02
  -5.5990000e-02
  -4.0330000e-02
   4.0140000e-02
   9.8840000e-02
  -3.8000000e-02
  -3.6520000e-02
   2.2980000e-02
  -1.0825000e-01
   4.9540000e-02
   4.2940000e-02
  -6.7700000e-02
   4.9650000e-02
   3.6470000e-02
   1.1200000e-03
   4.8640000e-02
  -4.5730000e-02
  -6.8980000e-02
  -1.6730000e-02
  -2.3940000e-02
  -1.0751000e-01
   5.5100000e-03
   3.2050000e-02
  -4.1460000e-02
   8.4150000e-02
   2.8600000e-02
  -5.3110000e-02
   9.5440000e-02
  -3.8220000e-02
  -5.3790000e-02
   2.3910000e-02
  -4.3590000e-02
  -1.4000000e-04
   3.1310000e-02
  -6.7150000e-02
   4.3900000e-03
   1.7220000e-02
  -8.0470000e-02
  -6.1010000e-02
  -6.9340000e-02
   1.6420000e-02
  -3.8100000e-03
   9.2290000e-02
  -1.2370000e-02
  -2.1550000e-02
   1.2579000e-01
  -1.9910000e-02
   3.1500000e-02
   9.8460000e-02
  -1.9760000e-01
   3.1370000e-02
  -7.8530000e-02
  -4.8860000e-02
   9.3660000e-02
  -2.9800000e-02
   2.3600000e-03
  -6.2380000e-02
  -2.1470000e-02
   1.7820000e-02
  -8.8300000e-03
   1.4419000e-01
   2.6050000e-02
   9.1600000e-03
   2.9260000e-02
  -7.7730000e-02
   7.9290000e-02
   5.3490000e-02
  -1.5080000e-02
   2.4400000e-03
  -1.4320000e-01
  -7.2250000e-02
   2.2350000e-02
  -1.3870000e-02
   9.5000000e-02
  -3.7620000e-02
  -5.2400000e-03
  -2.3500000e-02
   1.7740000e-02
   5.6370000e-02
  -5.8510000e-02
   4.0000000e-02
  -7.7400000e-02
  -3.4820000e-02
   5.5170000e-02
  -5.5660000e-02
   1.2530000e-02
  -1.7080000e-02
  -2.9420000e-02
   6.0000000e-04
   1.8510000e-02
   4.3400000e-02
   3.7600000e-03
  -2.4980000e-02
   2.4620000e-02
  -3.0820000e-02
   5.6120000e-02
   1.1870000e-02
  -3.8000000e-02
  -5.2200000e-02
  -1.0638000e-01
  -5.1850000e-02
  -9.6500000e-03
   1.7190000e-02
   1.5630000e-02
   2.4400000e-03
  -4.7650000e-02
   8.5240000e-02
  -9.0200000e-03
   2.3660000e-02
   3.3970000e-02
  -1.3698000e-01
   7.1600000e-03
   3.2960000e-02
  -2.6430000e-02
   7.4910000e-02
  -1.6970000e-02
  -7.2250000e-02
   3.9780000e-02
  -7.0110000e-02
   8.9960000e-02
  -4.9600000e-02
  -8.4230000e-02
   3.8930000e-02
  -1.0224000e-01
   1.0622000e-01
   3.6330000e-02
  -4.7240000e-02
   7.2820000e-02
  -5.1350000e-02
   9.1470000e-02
   6.1960000e-02
  -3.6520000e-02
   2.5470000e-02
  -8.4170000e-02
   2.7230000e-02
  -1.8340000e-02
  -6.9640000e-02
  -1.7770000e-02
  -1.0219000e-01
  -3.6900000e-02
   8.1540000e-02
  -4.8720000e-02
   4.1130000e-02
   8.8640000e-02
   3.5600000e-03
   1.0290000e-01
   1.5600000e-02
  -9.9230000e-02
   3.6270000e-02
  -3.9430000e-02
  -3.0820000e-02
   7.2880000e-02
  -1.8798000e-01
   4.4400000e-03
  -2.1820000e-02
   2.6730000e-02
   7.2250000e-02
  -6.4840000e-02
   2.3830000e-02
  -5.2890000e-02
   3.9560000e-02
   6.9340000e-02
  -1.8400000e-02
   6.5390000e-02
  -3.8190000e-02
  -7.0500000e-03
   4.7160000e-02
  -1.7110000e-02
   1.1730000e-02
  -8.5190000e-02
  -3.1150000e-02
  -2.4320000e-02
   1.0830000e-02
   3.6520000e-02
  -6.7670000e-02
  -7.0050000e-02
  -8.1950000e-02
   3.7260000e-02
   1.9770000e-02
   5.8540000e-02
  -1.5440000e-02
  -4.1810000e-02
   3.3720000e-02
  -3.7370000e-02
   4.7870000e-02
   5.2230000e-02
  -5.9880000e-02
   1.8590000e-02
  -8.6860000e-02
  -9.7530000e-02
   2.1900000e-03
  -3.4820000e-02
   8.6400000e-03
   1.3000000e-02
  -7.2140000e-02
   4.0000000e-03
   6.5200000e-02
   3.8000000e-02
   8.7550000e-02
  -4.6530000e-02
   3.3010000e-02
  -2.9100000e-03
  -4.6800000e-02
   7.9540000e-02
  -7.1730000e-02
   3.6580000e-02
  -2.8270000e-02
  -6.2710000e-02
   1.5820000e-02
  -4.6390000e-02
   2.3110000e-02
  -5.1630000e-02
  -1.4970000e-02
   9.6500000e-03
  -1.6040000e-02
   4.3590000e-02
   7.9180000e-02
   1.1840000e-02
   4.6910000e-02
   5.5000000e-04
   2.1660000e-02
   1.7710000e-02
   2.8650000e-02
   5.3500000e-03
  -9.5770000e-02
  -6.3450000e-02
  -7.6740000e-02
  -4.7400000e-03
   1.5130000e-02
  -2.5330000e-02
  -1.1000000e-04
  -5.1770000e-02
   4.4530000e-02
   3.4380000e-02
   8.3630000e-02
   5.0940000e-02
  -1.4860000e-02
   5.3990000e-02
  -2.5640000e-02
   2.7030000e-02
   3.5180000e-02
  -1.1984000e-01
   1.0400000e-03
  -8.7000000e-02
  -5.4810000e-02
  -2.0320000e-02
  -9.2150000e-02
   2.1580000e-02
  -2.9450000e-02
   2.5060000e-02
   4.1870000e-02
   8.6100000e-03
   7.1780000e-02
   1.6970000e-02
  -1.0720000e-02
  -1.9440000e-02
  -2.3990000e-02
   2.5830000e-02
   3.0520000e-02
  -2.7580000e-02
  -2.9750000e-02
  -8.7050000e-02
   4.1400000e-03
  -4.3300000e-03
  -8.0750000e-02
   4.4400000e-03
  -2.0070000e-02
  -1.1320000e-02
   5.9940000e-02
  -4.1980000e-02
   2.7940000e-02
   7.1950000e-02
  -9.7300000e-03
   9.0200000e-03
   1.5960000e-02
  -3.4350000e-02
  -4.3240000e-02
   2.8930000e-02
  -2.4050000e-02
   6.6870000e-02
   1.2640000e-02
  -1.1222000e-01
  -4.3100000e-02
  -4.7710000e-02
  -4.6830000e-02
   8.6390000e-02
  -3.3200000e-02
  -5.0860000e-02
   4.1150000e-02
   4.6120000e-02
   4.3070000e-02
   1.0397000e-01
   1.9710000e-02
  -6.6000000e-02
  -2.8840000e-02
  -3.8250000e-02
  -9.0040000e-02
   5.9740000e-02
  -7.8420000e-02
  -3.0680000e-02
  -3.4080000e-02
  -6.8520000e-02
  -1.2600000e-03
   7.3620000e-02
  -1.2300000e-03
   7.0410000e-02
   2.2800000e-03
  -2.7010000e-02
   8.7550000e-02
   4.3180000e-02
   5.0150000e-02
  -2.2920000e-02
   1.3700000e-03
  -4.3350000e-02
  -4.1510000e-02
  -5.7300000e-02
  -4.7460000e-02
  -1.4670000e-02
  -3.7300000e-03
   2.2510000e-02
  -6.0480000e-02
  -1.3520000e-02
   1.5130000e-02
  -7.0200000e-03
   8.8970000e-02
  -3.3450000e-02
  -4.9000000e-04
   3.1810000e-02
  -3.8360000e-02
   1.0106000e-01
   3.1610000e-02
  -3.1230000e-02
   2.1610000e-02
  -1.0509000e-01
  -7.8390000e-02
   3.3010000e-02
  -1.4090000e-02
  -4.1980000e-02
  -4.6900000e-03
  -8.3650000e-02
   7.7000000e-04
   3.8770000e-02
   2.9670000e-02
   4.8640000e-02
  -3.1370000e-02
  -3.7510000e-02
   1.2040000e-02
   4.1620000e-02
   5.8320000e-02
  -3.7000000e-03
  -3.3500000e-03
  -7.1590000e-02
  -2.4430000e-02
  -1.3240000e-02
  -5.7910000e-02
   1.2230000e-02
  -5.5000000e-02
  -9.2950000e-02
   6.1800000e-02
  -3.2440000e-02
   6.7200000e-02
   5.4840000e-02
  -1.8590000e-02
  -7.4600000e-03
  -3.8690000e-02
   3.3530000e-02
   3.7400000e-02
   4.1730000e-02
   5.3220000e-02
  -4.9160000e-02
  -2.6430000e-02
  -5.4120000e-02
  -4.6470000e-02
   1.9630000e-02
  -2.3830000e-02
  -3.2710000e-02
  -1.2390000e-02
  -4.4360000e-02
   6.6900000e-02
   5.9910000e-02
  -8.6600000e-03
   8.6370000e-02
  -1.0940000e-02
  -6.9830000e-02
   7.0300000e-02
  -3.6740000e-02
   1.0470000e-02
   7.5920000e-02
  -9.0400000e-02
  -5.6500000e-03
  -1.9030000e-02
  -3.2660000e-02
  -2.8980000e-02
  -1.9470000e-02
  -5.1240000e-02
  -3.9400000e-02
   4.7710000e-02
   8.3600000e-03
   3.2740000e-02
   1.2111000e-01
  -5.2700000e-02
  -7.1000000e-04
   1.1800000e-03
  -6.4730000e-02
   4.6450000e-02
  -6.6650000e-02
  -3.9480000e-02
   8.3900000e-03
  -6.3030000e-02
  -1.9000000e-04
  -6.1580000e-02
  -1.0836000e-01
   3.9730000e-02
  -3.9130000e-02
   8.6530000e-02
   3.0000000e-02
  -5.3080000e-02
   1.2006000e-01
  -6.2130000e-02
   9.1410000e-02
   8.7270000e-02
  -6.3470000e-02
   7.9950000e-02
  -1.1614000e-01
  -5.9660000e-02
   5.9850000e-02
  -1.0704000e-01
   5.2600000e-03
  -1.4070000e-02
  -5.7500000e-02
   8.7110000e-02
   2.8460000e-02
   8.9700000e-03
   9.3740000e-02
  -7.9460000e-02
  -1.2940000e-02
   2.8410000e-02
  -3.8900000e-03
   5.9200000e-02
   3.5750000e-02
  -1.0655000e-01
  -1.5440000e-02
  -6.7810000e-02
  -1.1200000e-03
   2.8500000e-03
  -8.9990000e-02
   1.8070000e-02
  -6.0510000e-02
   6.2510000e-02
   9.3500000e-03
   4.2800000e-02
   4.0900000e-03
  -7.5100000e-03
   3.1560000e-02
  -6.9040000e-02
   1.0197000e-01
  -2.5170000e-02
  -8.6600000e-03
   2.8240000e-02
  -1.3484000e-01
   5.8760000e-02
  -2.1390000e-02
  -6.0320000e-02
  -1.6090000e-02
  -9.0230000e-02
   1.7250000e-02
   1.9060000e-02
  -2.4100000e-02
   1.7880000e-02
  -2.3000000e-03
   2.0600000e-03
   5.7820000e-02
  -5.5740000e-02
  -2.7560000e-02
   5.0400000e-03
  -1.1760000e-02
   2.2620000e-02
   2.4570000e-02
   1.4610000e-02
   3.6080000e-02
  -2.0230000e-02
  -3.4680000e-02
  -7.8420000e-02
  -3.8700000e-03
   4.2060000e-02
  -4.1950000e-02
   3.8910000e-02
  -9.2430000e-02
   2.3910000e-02
   6.2290000e-02
   2.4370000e-02
   1.4390000e-02
  -2.3280000e-02
  -2.9010000e-02
  -2.1170000e-02
  -8.2000000e-03
  -3.0000000e-05
   5.1960000e-02
   1.3600000e-02
  -3.5620000e-02
   3.0960000e-02
  -6.3230000e-02
   2.0620000e-02
   3.5640000e-02
  -5.8100000e-03
   4.4500000e-02
  -3.2790000e-02
  -7.4440000e-02
  -2.1610000e-02
  -5.8000000e-04
   2.6790000e-02
   6.2840000e-02
   3.2550000e-02
  -7.1590000e-02
   8.7700000e-03
  -5.8510000e-02
  -1.5110000e-02
   6.2540000e-02
  -6.1010000e-02
  -3.5120000e-02
  -7.7290000e-02
  -6.4710000e-02
   1.7790000e-02
   3.5100000e-02
   6.9200000e-02
  -2.6710000e-02
   7.3500000e-03
  -1.0360000e-02
  -2.2240000e-02
  -1.4590000e-02
  -4.2030000e-02
   2.6300000e-03
   2.4900000e-02
  -7.4440000e-02
  -1.6920000e-02
  -4.8150000e-02
   1.7900000e-02
   2.8600000e-02
  -1.8810000e-02
   9.9300000e-03
   2.6600000e-03
   4.1890000e-02
  -5.5490000e-02
   5.8540000e-02
  -5.5690000e-02
   6.4490000e-02
   7.5130000e-02
  -4.0220000e-02
   7.3040000e-02
  -9.1470000e-02
  -1.7300000e-02
   5.7170000e-02
  -3.3400000e-02
   4.3600000e-03
  -6.2100000e-02
  -5.5520000e-02
  -2.9200000e-02
  -8.6600000e-03
   2.4810000e-02
  -4.6250000e-02
   5.6150000e-02
  -7.9000000e-03
  -4.0220000e-02
   8.9960000e-02
   1.2640000e-02
   2.9150000e-02
   8.7160000e-02
  -8.4610000e-02
   4.7190000e-02
  -2.5310000e-02
  -4.2280000e-02
   2.9010000e-02
  -1.0962000e-01
  -6.1100000e-03
   1.1840000e-02
   2.0760000e-02
   2.7090000e-02
  -4.0830000e-02
  -1.4480000e-02
  -5.3960000e-02
   5.9500000e-03
  -2.6350000e-02
   2.3990000e-02
   4.7130000e-02
   1.6290000e-02
  -1.2010000e-02
  -1.3600000e-02
   4.7020000e-02
   8.0000000e-05
  -3.9800000e-03
  -6.5610000e-02
  -1.4534000e-01
   1.6500000e-03
  -1.4720000e-02
  -9.6020000e-02
   9.1690000e-02
  -8.5930000e-02
   3.2100000e-03
   1.5464000e-01
  -4.6120000e-02
   5.2590000e-02
   1.7710000e-02
  -3.6380000e-02
   7.8910000e-02
  -1.5770000e-02
  -1.1380000e-02
  -5.5440000e-02
  -3.2760000e-02
   1.2420000e-02
  -2.6900000e-03
  -1.8340000e-02
  -1.1247000e-01
  -3.9180000e-02
  -2.1660000e-02
   2.1580000e-02
   8.7600000e-02
   1.2150000e-02
  -6.6100000e-03
   8.0900000e-03
  -6.3530000e-02
  -1.0280000e-02
   1.1900000e-02
  -7.8400000e-03
  -1.0830000e-02
  -1.0610000e-02
   7.0500000e-03
  -3.1910000e-02
   4.1920000e-02
   2.9340000e-02
  -2.5660000e-02
   1.2280000e-02
  -1.0082000e-01
  -5.8510000e-02
   2.3720000e-02
  -4.2060000e-02
   7.9290000e-02
  -3.2130000e-02
  -1.2750000e-02
   2.6490000e-02
  -3.8140000e-02
   1.8890000e-02
   2.8490000e-02
  -4.1700000e-02
   8.2300000e-03
   5.0500000e-02
  -1.8420000e-02
   6.7640000e-02
   3.1200000e-02
  -2.3360000e-02
  -3.5590000e-02
   1.9110000e-02
  -8.1210000e-02
   3.8660000e-02
   4.4030000e-02
  -8.1020000e-02
   4.4120000e-02
   2.9170000e-02
  -4.9400000e-03
   3.1390000e-02
   5.7170000e-02
  -6.2790000e-02
   1.1160000e-02
  -1.0560000e-02
  -4.8060000e-02
   1.1093000e-01
  -4.8390000e-02
  -2.2590000e-02
  -1.9550000e-02
  -1.2906000e-01
   1.6940000e-02
   5.0070000e-02
  -4.6580000e-02
   1.4000000e-04
  -8.8530000e-02
  -5.1820000e-02
   7.2690000e-02
   5.4590000e-02
   5.3490000e-02
   3.1170000e-02
  -8.0230000e-02
  -4.0500000e-02
   2.2650000e-02
  -1.1680000e-02
  -1.1840000e-02
  -5.7140000e-02
  -7.3890000e-02
   3.2550000e-02
   3.4520000e-02
  -2.8020000e-02
  -3.4600000e-02
  -4.8260000e-02
  -1.3020000e-02
   5.8810000e-02
   1.8340000e-02
  -2.6160000e-02
  -3.2550000e-02
   4.4400000e-03
  -3.1300000e-03
   5.2230000e-02
   1.1050000e-02
  -3.5310000e-02
  -9.3000000e-04
  -5.6840000e-02
   3.1750000e-02
   5.6230000e-02
  -6.7700000e-03
  -6.6900000e-03
  -7.8100000e-03
  -7.4000000e-02
   4.4640000e-02
   1.6150000e-02
   3.2220000e-02
   9.0800000e-03
  -8.2990000e-02
   6.8110000e-02
  -7.1860000e-02
   6.3390000e-02
   5.8510000e-02
  -9.9830000e-02
   1.9490000e-02
  -9.6290000e-02
   3.8330000e-02
  -2.1110000e-02
   4.4170000e-02
   3.4500000e-03
  -4.2170000e-02
   7.4390000e-02
  -2.6620000e-02
   8.6970000e-02
  -3.0930000e-02
  -6.9230000e-02
   4.4530000e-02
  -4.7300000e-02
   5.7030000e-02
  -9.7100000e-03
  -9.9750000e-02
   6.9600000e-03
  -5.2090000e-02
  -1.1600000e-02
   4.6690000e-02
  -4.4660000e-02
   2.0600000e-03
  -1.7220000e-02
  -6.7860000e-02
   4.1510000e-02
  -5.2590000e-02
   2.3440000e-02
   3.9920000e-02
  -1.8420000e-02
  -3.2930000e-02
  -3.4630000e-02
   2.2590000e-02
   2.2730000e-02
   1.5400000e-03
  -8.8800000e-03
  -2.7060000e-02
  -4.1290000e-02
  -2.4270000e-02
   7.7890000e-02
  -1.4940000e-02
   3.3830000e-02
   1.9710000e-02
  -1.8700000e-02
   1.2120000e-02
   7.1780000e-02
  -6.5200000e-02
   2.1100000e-03
   3.0000000e-02
  -1.2209000e-01
   1.0282000e-01
  -1.0381000e-01
  -4.9570000e-02
   8.3100000e-03
  -3.6490000e-02
   7.2380000e-02
  -6.9750000e-02
   4.0900000e-03
  -3.0110000e-02
  -3.5040000e-02
   8.7240000e-02
  -3.8820000e-02
  -2.7250000e-02
   4.5790000e-02
  -5.3330000e-02
   7.0030000e-02
   6.6320000e-02
  -1.7820000e-02
   1.3650000e-02
   7.0500000e-03
  -4.2910000e-02
   1.6560000e-02
  -2.8380000e-02
  -7.5180000e-02
   6.6400000e-03
  -6.3230000e-02
  -3.6850000e-02
   3.8690000e-02
  -2.1080000e-02
   3.4460000e-02
   6.4600000e-02
  -5.5700000e-03
   4.5320000e-02
   2.6570000e-02
  -3.7450000e-02
   7.9050000e-02
  -5.2100000e-03
  -1.3080000e-02
  -2.2780000e-02
  -4.8090000e-02
  -1.4830000e-02
   2.0950000e-02
   8.5000000e-04
  -5.2640000e-02
  -6.7090000e-02
  -1.7930000e-02
  -1.4500000e-03
   9.3390000e-02
  -1.4700000e-02
  -1.2450000e-02
  -5.3770000e-02
  -1.7330000e-02
   2.3550000e-02
   4.5130000e-02
  -1.3700000e-03
  -1.2500000e-02
  -7.6030000e-02
   3.4880000e-02
