# Supplementary material for: A Novel Classification Method for Flutter Signals Based on the CNN and STFT
Source: Hindawi journal article supplement (doi:10.1155/2019/9375437), 2019-04-09
Supplement: f1 [file 9375437.f1.zip › 00_25_z18.0_23channel.txt]

  -2.2800000e-03
  -2.2200000e-03
  -2.2200000e-03
  -2.3300000e-03
  -2.3300000e-03
  -2.1900000e-03
  -2.2800000e-03
  -2.3000000e-03
  -2.3300000e-03
  -2.2200000e-03
  -2.1900000e-03
  -2.2800000e-03
  -2.3300000e-03
  -2.2800000e-03
  -2.3900000e-03
  -2.3600000e-03
  -2.2800000e-03
  -2.2800000e-03
  -2.2500000e-03
  -2.3600000e-03
  -2.3000000e-03
  -2.2200000e-03
  -2.3000000e-03
  -2.3300000e-03
  -2.2800000e-03
  -2.2800000e-03
  -2.2500000e-03
  -2.3600000e-03
  -2.3600000e-03
  -2.2500000e-03
  -2.2800000e-03
  -2.4100000e-03
  -2.3900000e-03
  -2.2500000e-03
  -2.3300000e-03
  -2.3900000e-03
  -2.3900000e-03
  -2.2800000e-03
  -2.2800000e-03
  -2.4700000e-03
  -2.3600000e-03
  -2.3300000e-03
  -2.3600000e-03
  -2.3600000e-03
  -2.3900000e-03
  -2.3600000e-03
  -2.3300000e-03
  -2.4400000e-03
  -2.3600000e-03
  -2.2500000e-03
  -2.2800000e-03
  -2.3600000e-03
  -2.3300000e-03
  -2.2800000e-03
  -2.3000000e-03
  -2.3900000e-03
  -2.3000000e-03
  -2.2500000e-03
  -2.3000000e-03
  -2.3300000e-03
  -2.3000000e-03
  -2.1900000e-03
  -2.2800000e-03
  -2.3600000e-03
  -2.3000000e-03
  -2.1700000e-03
  -2.2500000e-03
  -2.4100000e-03
  -2.3300000e-03
  -2.2800000e-03
  -2.2800000e-03
  -2.4400000e-03
  -2.3300000e-03
  -2.2200000e-03
  -2.3300000e-03
  -2.3000000e-03
  -2.3900000e-03
  -2.3000000e-03
  -2.2800000e-03
  -2.3600000e-03
  -2.2200000e-03
  -2.2200000e-03
  -2.3000000e-03
  -2.2800000e-03
  -2.3000000e-03
  -2.2200000e-03
  -2.2800000e-03
  -2.3900000e-03
  -2.3300000e-03
  -2.2500000e-03
  -2.2500000e-03
  -2.3600000e-03
  -2.3300000e-03
  -2.2500000e-03
  -2.2200000e-03
  -2.3900000e-03
  -2.3600000e-03
  -2.2200000e-03
  -2.3600000e-03
  -2.3600000e-03
  -2.3000000e-03
  -2.2500000e-03
  -2.3000000e-03
  -2.3600000e-03
  -2.3000000e-03
  -2.1900000e-03
  -2.3300000e-03
  -2.3600000e-03
  -2.2800000e-03
  -2.3000000e-03
  -2.2500000e-03
  -2.3600000e-03
  -2.3300000e-03
  -2.2200000e-03
  -2.3300000e-03
  -2.3300000e-03
  -2.2200000e-03
  -2.2800000e-03
  -2.2200000e-03
  -2.2800000e-03
  -2.3300000e-03
  -2.1700000e-03
  -2.2200000e-03
  -2.3300000e-03
  -2.2200000e-03
  -2.2800000e-03
  -2.3300000e-03
  -2.2500000e-03
  -2.3000000e-03
  -2.2200000e-03
  -2.3000000e-03
  -2.3900000e-03
  -2.2800000e-03
  -2.2500000e-03
  -2.2500000e-03
  -2.3000000e-03
  -2.3000000e-03
  -2.2200000e-03
  -2.2800000e-03
  -2.3900000e-03
  -2.3000000e-03
  -2.2800000e-03
  -2.3000000e-03
  -2.3600000e-03
  -2.3000000e-03
  -2.2500000e-03
  -2.2800000e-03
  -2.3600000e-03
  -2.2800000e-03
  -2.2200000e-03
  -2.2800000e-03
  -2.3300000e-03
  -2.3000000e-03
  -2.2800000e-03
  -2.3600000e-03
  -2.4400000e-03
  -2.3300000e-03
  -2.2500000e-03
  -2.3900000e-03
  -2.3900000e-03
  -2.2800000e-03
  -2.2500000e-03
  -2.2800000e-03
  -2.3600000e-03
  -2.2200000e-03
  -2.2500000e-03
  -2.2800000e-03
  -2.3000000e-03
  -2.2200000e-03
  -2.1400000e-03
  -2.1700000e-03
  -2.2500000e-03
  -2.2200000e-03
  -2.2200000e-03
  -2.2800000e-03
  -2.3300000e-03
  -2.3000000e-03
  -2.2500000e-03
  -2.2800000e-03
  -2.3600000e-03
  -2.2800000e-03
  -2.2200000e-03
  -2.3600000e-03
  -2.3900000e-03
  -2.3300000e-03
  -2.2500000e-03
  -2.2800000e-03
  -2.4100000e-03
  -2.3000000e-03
  -2.2200000e-03
  -2.3600000e-03
  -2.3600000e-03
  -2.3300000e-03
  -2.3000000e-03
  -2.2500000e-03
  -2.3900000e-03
  -2.3300000e-03
  -2.2200000e-03
  -2.3300000e-03
  -2.3900000e-03
  -2.3300000e-03
  -2.2500000e-03
  -2.3000000e-03
  -2.4400000e-03
  -2.3600000e-03
  -2.3000000e-03
  -2.4400000e-03
  -2.3900000e-03
  -2.3300000e-03
  -2.3300000e-03
  -2.3900000e-03
  -2.4400000e-03
  -2.4100000e-03
  -2.2200000e-03
  -2.3600000e-03
  -2.3900000e-03
  -2.3300000e-03
  -2.3900000e-03
  -2.4100000e-03
  -2.4400000e-03
  -2.3600000e-03
  -2.2200000e-03
  -2.3600000e-03
  -2.4400000e-03
  -2.3600000e-03
  -2.3000000e-03
  -2.3900000e-03
  -2.3900000e-03
  -2.3000000e-03
  -2.3000000e-03
  -2.3000000e-03
  -2.4100000e-03
  -2.2800000e-03
  -2.2200000e-03
  -2.3000000e-03
  -2.3600000e-03
  -2.3300000e-03
  -2.2200000e-03
  -2.3000000e-03
  -2.3300000e-03
  -2.2800000e-03
  -2.2800000e-03
  -2.3300000e-03
  -2.3900000e-03
  -2.3000000e-03
  -2.2500000e-03
  -2.3300000e-03
  -2.3900000e-03
  -2.3000000e-03
  -2.3000000e-03
  -2.3600000e-03
  -2.3900000e-03
  -2.2800000e-03
  -2.2800000e-03
  -2.3000000e-03
  -2.4100000e-03
  -2.2800000e-03
  -2.3300000e-03
  -2.3300000e-03
  -2.3600000e-03
  -2.3600000e-03
  -2.3000000e-03
  -2.4100000e-03
  -2.4400000e-03
  -2.2800000e-03
  -2.2800000e-03
  -2.4100000e-03
  -2.3900000e-03
  -2.3000000e-03
  -2.3300000e-03
  -2.3900000e-03
  -2.3600000e-03
  -2.2800000e-03
  -2.2800000e-03
  -2.3600000e-03
  -2.3900000e-03
  -2.3300000e-03
  -2.3000000e-03
  -2.2800000e-03
  -2.3600000e-03
  -2.3000000e-03
  -2.2200000e-03
  -2.3600000e-03
  -2.3300000e-03
  -2.3300000e-03
  -2.3000000e-03
  -2.3600000e-03
  -2.4400000e-03
  -2.3000000e-03
  -2.3000000e-03
  -2.4100000e-03
  -2.4100000e-03
  -2.2500000e-03
  -2.2800000e-03
  -2.3300000e-03
  -2.3300000e-03
  -2.2200000e-03
  -2.2500000e-03
  -2.3900000e-03
  -2.3900000e-03
  -2.3300000e-03
  -2.3300000e-03
  -2.3300000e-03
  -2.3900000e-03
  -2.4100000e-03
  -2.2500000e-03
  -2.3900000e-03
  -2.3900000e-03
  -2.2500000e-03
  -2.3000000e-03
  -2.3900000e-03
  -2.3900000e-03
  -2.3300000e-03
  -2.2500000e-03
  -2.3900000e-03
  -2.3900000e-03
  -2.2800000e-03
  -2.2200000e-03
  -2.3300000e-03
  -2.3600000e-03
  -2.3000000e-03
  -2.2200000e-03
  -2.3000000e-03
  -2.3900000e-03
  -2.2200000e-03
  -2.2500000e-03
  -2.3000000e-03
  -2.3000000e-03
  -2.1900000e-03
  -2.1400000e-03
  -2.2500000e-03
  -2.2800000e-03
  -2.2200000e-03
  -2.2500000e-03
  -2.3900000e-03
  -2.3600000e-03
  -2.2800000e-03
  -2.2200000e-03
  -2.3000000e-03
  -2.3300000e-03
  -2.1700000e-03
  -2.1900000e-03
  -2.3000000e-03
  -2.3600000e-03
  -2.3000000e-03
  -2.1900000e-03
  -2.3000000e-03
  -2.3600000e-03
  -2.2200000e-03
  -2.1700000e-03
  -2.2800000e-03
  -2.2500000e-03
  -2.2200000e-03
  -2.2500000e-03
  -2.3600000e-03
  -2.4100000e-03
  -2.2500000e-03
  -2.2500000e-03
  -2.3300000e-03
  -2.3000000e-03
  -2.2800000e-03
  -2.2200000e-03
  -2.3300000e-03
  -2.3900000e-03
  -2.2800000e-03
  -2.3000000e-03
  -2.3300000e-03
  -2.3600000e-03
  -2.3300000e-03
  -2.2200000e-03
  -2.3000000e-03
  -2.3900000e-03
  -2.3000000e-03
  -2.2500000e-03
  -2.3000000e-03
  -2.2800000e-03
  -2.2500000e-03
  -2.2800000e-03
  -2.3000000e-03
  -2.3900000e-03
  -2.2200000e-03
  -2.2500000e-03
  -2.3900000e-03
  -2.3000000e-03
  -2.2800000e-03
  -2.3000000e-03
  -2.3300000e-03
  -2.3900000e-03
  -2.2200000e-03
  -2.2200000e-03
  -2.3600000e-03
  -2.2200000e-03
  -2.1900000e-03
  -2.2500000e-03
  -2.3000000e-03
  -2.3900000e-03
  -2.2200000e-03
  -2.1100000e-03
  -2.3300000e-03
  -2.2800000e-03
  -2.1400000e-03
  -2.2200000e-03
  -2.2800000e-03
  -2.3300000e-03
  -2.1900000e-03
  -2.1700000e-03
  -2.3000000e-03
  -2.2500000e-03
  -2.2200000e-03
  -2.2800000e-03
  -2.3000000e-03
  -2.3000000e-03
  -2.3000000e-03
  -2.2200000e-03
  -2.3300000e-03
  -2.3600000e-03
  -2.1900000e-03
  -2.2200000e-03
  -2.2800000e-03
  -2.3900000e-03
  -2.2500000e-03
  -2.1900000e-03
  -2.3300000e-03
  -2.4100000e-03
  -2.3000000e-03
  -2.3900000e-03
  -2.4100000e-03
  -2.3600000e-03
  -2.2800000e-03
  -2.3000000e-03
  -2.4100000e-03
  -2.4100000e-03
  -2.3300000e-03
  -2.3300000e-03
  -2.3600000e-03
  -2.3300000e-03
  -2.3000000e-03
  -2.2500000e-03
  -2.3000000e-03
  -2.3000000e-03
  -2.1900000e-03
  -2.2500000e-03
  -2.3600000e-03
  -2.3000000e-03
  -2.2500000e-03
  -2.2500000e-03
  -2.3600000e-03
  -2.3900000e-03
  -2.2800000e-03
  -2.2800000e-03
  -2.3000000e-03
  -2.3900000e-03
  -2.3000000e-03
  -2.2200000e-03
  -2.3900000e-03
  -2.3300000e-03
  -2.2500000e-03
  -2.3300000e-03
  -2.3600000e-03
  -2.3900000e-03
  -2.3000000e-03
  -2.2200000e-03
  -2.3000000e-03
  -2.3600000e-03
  -2.2500000e-03
  -2.3000000e-03
  -2.4400000e-03
  -2.3900000e-03
  -2.3600000e-03
  -2.3900000e-03
  -2.4100000e-03
  -2.4400000e-03
  -2.3000000e-03
  -2.2800000e-03
  -2.4400000e-03
  -2.3600000e-03
  -2.3300000e-03
  -2.3300000e-03
  -2.3600000e-03
  -2.4100000e-03
  -2.2500000e-03
  -2.2500000e-03
  -2.3900000e-03
  -2.3600000e-03
  -2.3300000e-03
  -2.3600000e-03
  -2.3900000e-03
  -2.3600000e-03
  -2.3000000e-03
  -2.3300000e-03
  -2.3900000e-03
  -2.3600000e-03
  -2.3000000e-03
  -2.3000000e-03
  -2.4700000e-03
  -3.0200000e-03
  -2.8800000e-03
  -2.9100000e-03
  -2.9300000e-03
  -2.4100000e-03
  -2.3000000e-03
  -2.3600000e-03
  -2.3900000e-03
  -2.3900000e-03
  -2.3300000e-03
  -2.2500000e-03
  -2.3600000e-03
  -2.3900000e-03
  -2.2800000e-03
  -2.3000000e-03
  -2.3600000e-03
  -2.3600000e-03
  -2.2800000e-03
  -2.2800000e-03
  -2.4400000e-03
  -2.5000000e-03
  -2.3600000e-03
  -2.3300000e-03
  -2.4100000e-03
  -2.3600000e-03
  -2.3000000e-03
  -2.2200000e-03
  -2.3600000e-03
  -2.3900000e-03
  -2.2800000e-03
  -2.3300000e-03
  -2.3600000e-03
  -2.3000000e-03
  -2.2500000e-03
  -2.2800000e-03
  -2.3600000e-03
  -2.3900000e-03
  -2.2200000e-03
  -2.2800000e-03
  -2.3600000e-03
  -2.4400000e-03
  -2.3300000e-03
  -2.3000000e-03
  -2.3300000e-03
  -2.3300000e-03
  -2.1900000e-03
  -2.2200000e-03
  -2.3300000e-03
  -2.3000000e-03
  -2.2800000e-03
  -2.2500000e-03
  -2.3000000e-03
  -2.2500000e-03
  -2.2200000e-03
  -2.2800000e-03
  -2.3000000e-03
  -2.3300000e-03
  -2.3000000e-03
  -2.2500000e-03
  -2.3900000e-03
  -2.3900000e-03
  -2.2500000e-03
  -2.3300000e-03
  -2.4700000e-03
  -2.3900000e-03
  -2.3300000e-03
  -2.3300000e-03
  -2.4100000e-03
  -2.4100000e-03
  -2.2800000e-03
  -2.3000000e-03
  -2.3900000e-03
  -2.3600000e-03
  -2.3600000e-03
  -2.4100000e-03
  -2.4400000e-03
  -2.3900000e-03
  -2.2500000e-03
  -2.3300000e-03
  -2.3900000e-03
  -2.3300000e-03
  -2.3000000e-03
  -2.3300000e-03
  -2.3900000e-03
  -2.4100000e-03
  -2.2800000e-03
  -2.2800000e-03
  -2.4700000e-03
  -2.3600000e-03
  -2.3600000e-03
  -2.3300000e-03
  -2.3300000e-03
  -2.3900000e-03
  -2.3300000e-03
  -2.3300000e-03
  -2.3900000e-03
  -2.3900000e-03
  -2.2800000e-03
  -2.3000000e-03
  -2.3600000e-03
  -2.3600000e-03
  -2.3300000e-03
  -2.3300000e-03
  -2.4100000e-03
  -2.3900000e-03
  -2.2800000e-03
  -2.2800000e-03
  -2.3600000e-03
  -2.3600000e-03
  -2.2500000e-03
  -2.2500000e-03
  -2.4100000e-03
  -2.3000000e-03
  -2.2500000e-03
  -2.3000000e-03
  -2.3300000e-03
  -2.3300000e-03
  -2.2500000e-03
  -2.2200000e-03
  -2.3300000e-03
  -2.3000000e-03
  -2.1700000e-03
  -2.2500000e-03
  -2.3000000e-03
  -2.2800000e-03
  -2.1900000e-03
  -2.2500000e-03
  -2.3300000e-03
  -2.2800000e-03
  -2.2200000e-03
  -2.2500000e-03
  -2.4100000e-03
  -2.3900000e-03
  -2.2800000e-03
  -2.3300000e-03
  -2.4400000e-03
  -2.3900000e-03
  -2.3300000e-03
  -2.3300000e-03
  -2.3900000e-03
  -2.3600000e-03
  -2.3300000e-03
  -2.3000000e-03
  -2.3600000e-03
  -2.3300000e-03
  -2.3000000e-03
  -2.3300000e-03
  -2.3900000e-03
  -2.3300000e-03
  -2.2500000e-03
  -2.3000000e-03
  -2.4100000e-03
  -2.3900000e-03
  -2.2500000e-03
  -2.3300000e-03
  -2.3300000e-03
  -2.2800000e-03
  -2.2800000e-03
  -2.3000000e-03
  -2.3900000e-03
  -2.3300000e-03
  -2.2500000e-03
  -2.2500000e-03
  -2.3900000e-03
  -2.2500000e-03
  -2.2200000e-03
  -2.2500000e-03
  -2.3300000e-03
  -2.3000000e-03
  -2.1900000e-03
  -2.2800000e-03
  -2.3300000e-03
  -2.2500000e-03
  -2.3000000e-03
  -2.2800000e-03
  -2.3300000e-03
  -2.3300000e-03
  -2.2500000e-03
  -2.3600000e-03
  -2.4100000e-03
  -2.2800000e-03
  -2.2200000e-03
  -2.3000000e-03
  -2.3300000e-03
  -2.3300000e-03
  -2.2200000e-03
  -2.3000000e-03
  -2.3300000e-03
  -2.2500000e-03
  -2.2200000e-03
  -2.2800000e-03
  -2.3000000e-03
  -2.2800000e-03
  -2.2500000e-03
  -2.2200000e-03
  -2.3900000e-03
  -2.3300000e-03
  -2.2800000e-03
  -2.3300000e-03
  -2.3600000e-03
  -2.3600000e-03
  -2.2800000e-03
  -2.3300000e-03
  -2.4100000e-03
  -2.3600000e-03
  -2.3000000e-03
  -2.3300000e-03
  -2.4100000e-03
  -2.3600000e-03
  -2.3600000e-03
  -2.3000000e-03
  -2.4400000e-03
  -2.3900000e-03
  -2.3000000e-03
  -2.3600000e-03
  -2.4100000e-03
  -2.4100000e-03
  -2.3900000e-03
  -2.3600000e-03
  -2.4400000e-03
  -2.4700000e-03
  -2.3300000e-03
  -2.3600000e-03
  -2.4100000e-03
  -2.3300000e-03
  -2.3000000e-03
  -2.3300000e-03
  -2.3900000e-03
  -2.4100000e-03
  -2.2500000e-03
  -2.3000000e-03
  -2.4400000e-03
  -2.3600000e-03
  -2.3000000e-03
  -2.3600000e-03
  -2.3900000e-03
  -2.3300000e-03
  -2.2800000e-03
  -2.4100000e-03
  -2.4700000e-03
  -2.3300000e-03
  -2.2800000e-03
  -2.3300000e-03
  -2.4100000e-03
  -2.3900000e-03
  -2.3000000e-03
  -2.3900000e-03
  -2.4400000e-03
  -2.3900000e-03
  -2.3600000e-03
  -2.3900000e-03
  -2.4100000e-03
  -2.3900000e-03
  -2.3300000e-03
  -2.4100000e-03
  -2.4100000e-03
  -2.3600000e-03
  -2.3300000e-03
  -2.3900000e-03
  -2.5200000e-03
  -2.4100000e-03
  -2.3300000e-03
  -2.4100000e-03
  -2.4400000e-03
  -2.3600000e-03
  -2.3300000e-03
  -2.3900000e-03
  -2.4100000e-03
  -2.3000000e-03
  -2.2500000e-03
  -2.3300000e-03
  -2.3900000e-03
  -2.3300000e-03
  -2.3300000e-03
  -2.3300000e-03
  -2.4400000e-03
  -2.4100000e-03
  -2.3000000e-03
  -2.3900000e-03
  -2.4700000e-03
  -2.3600000e-03
  -2.3600000e-03
  -2.3900000e-03
  -2.3900000e-03
  -2.3600000e-03
  -2.2800000e-03
  -2.3600000e-03
  -2.4100000e-03
  -2.3600000e-03
  -2.3000000e-03
  -2.3600000e-03
  -2.3900000e-03
  -2.3900000e-03
  -2.3000000e-03
  -2.3600000e-03
  -2.4700000e-03
  -2.3300000e-03
  -2.2800000e-03
  -2.3900000e-03
  -2.4100000e-03
  -2.3000000e-03
  -2.3300000e-03
  -2.3900000e-03
  -2.4100000e-03
  -2.3000000e-03
  -2.2500000e-03
  -2.3600000e-03
  -2.3600000e-03
  -2.3300000e-03
  -2.3000000e-03
  -2.3300000e-03
  -2.3900000e-03
  -2.2500000e-03
  -2.2500000e-03
  -2.3600000e-03
  -2.4100000e-03
  -2.3300000e-03
  -2.2800000e-03
  -2.3300000e-03
  -2.3900000e-03
  -2.3600000e-03
  -2.3300000e-03
  -2.3000000e-03
  -2.3900000e-03
  -2.3600000e-03
  -2.3000000e-03
  -2.3900000e-03
  -2.4100000e-03
  -2.3900000e-03
  -2.3000000e-03
  -2.4100000e-03
  -2.4700000e-03
  -2.3900000e-03
  -2.3300000e-03
  -2.4100000e-03
  -2.4100000e-03
  -2.2800000e-03
  -2.2500000e-03
  -2.3600000e-03
  -2.3300000e-03
  -2.3300000e-03
  -2.3300000e-03
  -2.3300000e-03
  -2.3600000e-03
  -2.3000000e-03
  -2.2200000e-03
  -2.3300000e-03
  -2.3900000e-03
  -2.3300000e-03
  -2.3000000e-03
  -2.3600000e-03
  -2.4100000e-03
  -2.3600000e-03
  -2.3000000e-03
  -2.3600000e-03
  -2.4400000e-03
  -2.3000000e-03
  -2.2800000e-03
  -2.3300000e-03
  -2.3900000e-03
  -2.3600000e-03
  -2.2500000e-03
  -2.3600000e-03
  -2.3900000e-03
  -2.2500000e-03
  -2.2800000e-03
  -2.3300000e-03
  -2.3300000e-03
  -2.2800000e-03
  -2.2200000e-03
  -2.3300000e-03
  -2.3900000e-03
  -2.3000000e-03
  -2.2800000e-03
  -2.3900000e-03
  -2.4400000e-03
  -2.3000000e-03
  -2.2500000e-03
  -2.3300000e-03
  -2.3600000e-03
  -2.2500000e-03
  -2.2200000e-03
  -2.3000000e-03
  -2.3000000e-03
  -2.2800000e-03
  -2.2200000e-03
  -2.2500000e-03
  -2.2800000e-03
  -2.2500000e-03
  -2.2200000e-03
  -2.3000000e-03
  -2.3600000e-03
  -2.3600000e-03
  -2.2200000e-03
  -2.3000000e-03
  -2.3600000e-03
  -2.2500000e-03
  -2.2200000e-03
  -2.3300000e-03
  -2.3600000e-03
  -2.2800000e-03
  -2.3300000e-03
  -2.3600000e-03
  -2.4700000e-03
  -2.3600000e-03
  -2.3000000e-03
  -2.3600000e-03
  -2.4100000e-03
  -2.3300000e-03
  -2.2800000e-03
  -2.3300000e-03
  -2.3600000e-03
  -2.2500000e-03
  -2.2800000e-03
  -2.3900000e-03
  -2.3900000e-03
  -2.2500000e-03
  -2.2500000e-03
  -2.2800000e-03
  -2.3300000e-03
  -2.2500000e-03
  -2.2200000e-03
  -2.3600000e-03
  -2.3900000e-03
  -2.2200000e-03
  -2.2500000e-03
  -2.3000000e-03
  -2.3000000e-03
  -2.3300000e-03
  -2.2500000e-03
  -2.3300000e-03
  -2.3600000e-03
  -2.3000000e-03
  -2.2800000e-03
  -2.3600000e-03
  -2.4100000e-03
  -2.3300000e-03
  -2.3000000e-03
  -2.3900000e-03
  -2.4400000e-03
  -2.2800000e-03
  -2.3000000e-03
  -2.3600000e-03
  -2.4100000e-03
  -2.3000000e-03
  -2.2800000e-03
  -2.4100000e-03
  -2.4700000e-03
  -2.3600000e-03
  -2.3000000e-03
  -2.3300000e-03
  -2.3600000e-03
  -2.3900000e-03
  -2.3300000e-03
  -2.4700000e-03
  -2.4400000e-03
  -2.4100000e-03
  -2.4100000e-03
  -2.4100000e-03
  -2.4700000e-03
  -2.4100000e-03
  -2.3300000e-03
  -2.3900000e-03
  -2.4400000e-03
  -2.3000000e-03
  -2.3600000e-03
  -2.4100000e-03
  -2.4700000e-03
  -2.3600000e-03
  -2.2800000e-03
  -2.3600000e-03
  -2.3900000e-03
  -2.2200000e-03
  -2.3300000e-03
  -2.4100000e-03
  -2.3900000e-03
  -2.3600000e-03
  -2.2800000e-03
  -2.3600000e-03
  -2.4100000e-03
  -2.2500000e-03
  -2.2200000e-03
  -2.4100000e-03
  -2.3600000e-03
  -2.3000000e-03
  -2.2200000e-03
  -2.3000000e-03
  -2.3300000e-03
  -2.2500000e-03
  -2.3000000e-03
  -2.3600000e-03
  -2.3000000e-03
  -2.2800000e-03
  -2.2500000e-03
  -2.3300000e-03
  -2.4100000e-03
  -2.3000000e-03
  -2.2500000e-03
  -2.3900000e-03
  -2.3900000e-03
  -2.3900000e-03
  -2.3000000e-03
  -2.3600000e-03
  -2.4700000e-03
  -2.3300000e-03
  -2.3000000e-03
  -2.3900000e-03
  -2.3900000e-03
  -2.3600000e-03
  -2.3900000e-03
  -2.4100000e-03
  -2.4700000e-03
  -2.3600000e-03
  -2.3600000e-03
  -2.4400000e-03
  -2.4700000e-03
  -2.3600000e-03
  -2.2800000e-03
  -2.3900000e-03
  -2.3900000e-03
  -2.3300000e-03
  -2.2500000e-03
  -2.3300000e-03
  -2.3300000e-03
  -2.2200000e-03
  -2.3000000e-03
  -2.3300000e-03
  -2.4400000e-03
  -2.3000000e-03
  -2.3000000e-03
  -2.4100000e-03
  -2.3300000e-03
  -2.2500000e-03
  -2.2800000e-03
  -2.2800000e-03
  -2.3300000e-03
  -2.3000000e-03
  -2.2200000e-03
  -2.3600000e-03
  -2.3900000e-03
  -2.3000000e-03
  -2.2800000e-03
  -2.3600000e-03
  -2.3600000e-03
  -2.3300000e-03
  -2.2200000e-03
  -2.3000000e-03
  -2.3300000e-03
  -2.2500000e-03
  -2.3300000e-03
  -2.3300000e-03
  -2.3600000e-03
  -2.2800000e-03
  -2.2500000e-03
  -2.3300000e-03
  -2.3600000e-03
  -2.2800000e-03
  -2.3000000e-03
  -2.3600000e-03
  -2.3600000e-03
  -2.2800000e-03
  -2.2200000e-03
  -2.3300000e-03
  -2.3900000e-03
  -2.2200000e-03
  -2.3600000e-03
  -2.3900000e-03
  -2.3600000e-03
  -2.3300000e-03
  -2.3300000e-03
  -2.4100000e-03
  -2.4100000e-03
  -2.2500000e-03
  -2.3000000e-03
  -2.4400000e-03
  -2.3900000e-03
  -2.3300000e-03
  -2.3300000e-03
  -2.4400000e-03
  -2.4400000e-03
  -2.2500000e-03
  -2.3300000e-03
  -2.4400000e-03
  -2.3300000e-03
  -2.2800000e-03
  -2.3000000e-03
  -2.3300000e-03
  -2.3900000e-03
  -2.2500000e-03
  -2.2500000e-03
  -2.3900000e-03
  -2.3600000e-03
  -2.2500000e-03
  -2.2500000e-03
  -2.3600000e-03
  -2.4100000e-03
  -2.3000000e-03
  -2.2500000e-03
  -2.3900000e-03
  -2.3000000e-03
  -2.2200000e-03
  -2.2800000e-03
  -2.3900000e-03
  -2.4100000e-03
  -2.2500000e-03
  -2.2500000e-03
  -2.3300000e-03
  -2.3000000e-03
  -2.2200000e-03
  -2.3000000e-03
  -2.3600000e-03
  -2.3600000e-03
  -2.2800000e-03
  -2.2500000e-03
  -2.4400000e-03
  -2.3600000e-03
  -2.3300000e-03
  -2.3900000e-03
  -2.4400000e-03
  -2.3900000e-03
  -2.3300000e-03
  -2.3300000e-03
  -2.3900000e-03
  -2.3300000e-03
  -2.2500000e-03
  -2.3000000e-03
  -2.3900000e-03
  -2.3300000e-03
  -2.2800000e-03
  -2.3000000e-03
  -2.4100000e-03
  -2.3900000e-03
  -2.2800000e-03
  -2.3600000e-03
  -2.3900000e-03
  -2.3900000e-03
  -2.2800000e-03
  -2.2500000e-03
  -2.4400000e-03
  -2.4100000e-03
  -2.2800000e-03
  -2.3000000e-03
  -2.3900000e-03
  -2.4100000e-03
  -2.3600000e-03
  -2.3000000e-03
  -2.4100000e-03
  -2.3600000e-03
  -2.3300000e-03
  -2.3300000e-03
  -2.3600000e-03
  -2.3300000e-03
  -2.2500000e-03
  -2.2200000e-03
  -2.3600000e-03
  -2.3300000e-03
  -2.2500000e-03
  -2.2800000e-03
  -2.3300000e-03
  -2.3300000e-03
  -2.2500000e-03
  -2.3000000e-03
  -2.4700000e-03
  -2.3900000e-03
  -2.2800000e-03
  -2.3000000e-03
  -2.3600000e-03
  -2.2800000e-03
  -2.2800000e-03
  -2.2500000e-03
  -2.3000000e-03
  -2.3000000e-03
  -2.1700000e-03
  -2.2200000e-03
  -2.3300000e-03
  -2.3000000e-03
  -2.3000000e-03
  -2.2500000e-03
  -2.2800000e-03
  -2.2800000e-03
  -2.1900000e-03
  -2.2200000e-03
  -2.3000000e-03
  -2.2200000e-03
  -2.1900000e-03
  -2.2200000e-03
  -2.2800000e-03
  -2.3300000e-03
  -2.1400000e-03
  -2.2500000e-03
  -2.3000000e-03
  -2.3000000e-03
  -2.2200000e-03
  -2.2200000e-03
  -2.3000000e-03
  -2.3300000e-03
  -2.2200000e-03
  -2.2200000e-03
  -2.3900000e-03
  -2.3600000e-03
  -2.2200000e-03
  -2.2200000e-03
  -2.2800000e-03
  -2.3300000e-03
  -2.2800000e-03
  -2.3300000e-03
  -2.4100000e-03
  -2.2800000e-03
  -2.2200000e-03
  -2.3600000e-03
  -2.3900000e-03
  -2.3600000e-03
  -2.2200000e-03
  -2.2200000e-03
  -2.3600000e-03
  -2.2800000e-03
  -2.2200000e-03
  -2.2200000e-03
  -2.3000000e-03
  -2.3900000e-03
  -2.2500000e-03
  -2.2500000e-03
  -2.3000000e-03
  -2.2800000e-03
  -2.2200000e-03
  -2.2500000e-03
  -2.3900000e-03
  -2.3000000e-03
  -2.2200000e-03
  -2.2500000e-03
  -2.2800000e-03
  -2.2800000e-03
  -2.1900000e-03
  -2.2200000e-03
  -2.2800000e-03
  -2.3000000e-03
  -2.2200000e-03
  -2.2500000e-03
  -2.3300000e-03
  -2.2800000e-03
  -2.2500000e-03
  -2.3000000e-03
  -2.3000000e-03
  -2.3600000e-03
  -2.2500000e-03
  -2.2200000e-03
  -2.3300000e-03
  -2.2200000e-03
  -2.1700000e-03
  -2.3000000e-03
  -2.3000000e-03
  -2.3300000e-03
  -2.2800000e-03
  -2.2500000e-03
  -2.3900000e-03
  -2.3000000e-03
  -2.3000000e-03
  -2.3600000e-03
  -2.3300000e-03
  -2.1900000e-03
  -2.1700000e-03
  -2.1700000e-03
  -2.2800000e-03
  -2.2800000e-03
  -2.1700000e-03
  -2.2500000e-03
  -2.3000000e-03
  -2.2200000e-03
  -2.2500000e-03
  -2.2800000e-03
  -2.3600000e-03
  -2.2800000e-03
  -2.1400000e-03
  -2.2500000e-03
  -2.3000000e-03
  -2.3000000e-03
  -2.2200000e-03
  -2.2200000e-03
  -2.3300000e-03
  -2.3300000e-03
  -2.2200000e-03
  -2.1900000e-03
  -2.3900000e-03
  -2.3000000e-03
  -2.2200000e-03
  -2.2800000e-03
  -2.3300000e-03
  -2.3000000e-03
  -2.2200000e-03
  -2.2500000e-03
  -2.2800000e-03
  -2.2200000e-03
  -2.1900000e-03
  -2.3000000e-03
  -2.3000000e-03
  -2.2800000e-03
  -2.2200000e-03
  -2.3300000e-03
  -2.3900000e-03
  -2.3600000e-03
  -2.3300000e-03
  -2.3300000e-03
  -2.3900000e-03
  -2.3900000e-03
  -2.3300000e-03
  -2.3000000e-03
  -2.3900000e-03
  -2.3300000e-03
  -2.2800000e-03
  -2.2800000e-03
  -2.3600000e-03
  -2.3900000e-03
  -2.2800000e-03
  -2.3300000e-03
  -2.4100000e-03
  -2.3600000e-03
  -2.3000000e-03
  -2.3300000e-03
  -2.3600000e-03
  -2.3900000e-03
  -2.3300000e-03
  -2.3300000e-03
  -2.4100000e-03
  -2.3300000e-03
  -2.3300000e-03
  -2.3600000e-03
  -2.3900000e-03
  -2.4100000e-03
  -2.2800000e-03
  -2.3000000e-03
  -2.3600000e-03
  -2.2800000e-03
  -2.2800000e-03
  -2.3300000e-03
  -2.3600000e-03
  -2.3300000e-03
  -2.2500000e-03
  -2.3000000e-03
  -2.4400000e-03
  -2.3600000e-03
  -2.2200000e-03
  -2.2200000e-03
  -2.3600000e-03
  -2.3600000e-03
  -2.2800000e-03
  -2.3600000e-03
  -2.4100000e-03
  -2.3000000e-03
  -2.1900000e-03
  -2.3300000e-03
  -2.3900000e-03
  -2.3000000e-03
  -2.3000000e-03
  -2.3000000e-03
  -2.3300000e-03
  -2.2800000e-03
  -2.1400000e-03
  -2.2800000e-03
  -2.3300000e-03
  -2.3000000e-03
  -2.2800000e-03
  -2.2800000e-03
  -2.3300000e-03
  -2.2800000e-03
  -2.2200000e-03
  -2.2500000e-03
  -2.3600000e-03
  -2.2500000e-03
  -2.2800000e-03
  -2.2500000e-03
  -2.3000000e-03
  -2.2800000e-03
  -2.1400000e-03
  -2.3000000e-03
  -2.3900000e-03
  -2.2500000e-03
  -2.2500000e-03
  -2.3000000e-03
  -2.3300000e-03
  -2.3000000e-03
  -2.1700000e-03
  -2.2500000e-03
  -2.3300000e-03
  -2.1700000e-03
  -2.1700000e-03
  -2.2500000e-03
  -2.3300000e-03
  -2.2800000e-03
  -2.1700000e-03
  -2.1700000e-03
  -2.3000000e-03
  -2.2200000e-03
  -2.1700000e-03
  -2.3000000e-03
  -2.2800000e-03
  -2.2200000e-03
  -2.1900000e-03
  -2.2800000e-03
  -2.3000000e-03
  -2.1900000e-03
  -2.1900000e-03
  -2.2800000e-03
  -2.3300000e-03
  -2.3000000e-03
  -2.2500000e-03
  -2.3600000e-03
  -2.4700000e-03
  -2.3000000e-03
  -2.2500000e-03
  -2.3300000e-03
  -2.3300000e-03
  -2.2800000e-03
  -2.2500000e-03
  -2.3900000e-03
  -2.3600000e-03
  -2.3000000e-03
  -2.2200000e-03
  -2.3300000e-03
  -2.3000000e-03
  -2.2500000e-03
  -2.1700000e-03
  -2.2800000e-03
  -2.3300000e-03
  -2.2500000e-03
  -2.2200000e-03
  -2.2800000e-03
  -2.3000000e-03
  -2.3000000e-03
  -2.1900000e-03
  -2.2800000e-03
  -2.3900000e-03
  -2.3000000e-03
  -2.2800000e-03
  -2.3300000e-03
  -2.3300000e-03
  -2.2500000e-03
  -2.1700000e-03
  -2.2500000e-03
  -2.3300000e-03
  -2.2200000e-03
  -2.2200000e-03
  -2.2800000e-03
  -2.3300000e-03
  -2.2500000e-03
  -2.1900000e-03
  -2.2500000e-03
  -2.3300000e-03
  -2.2500000e-03
  -2.1400000e-03
  -2.3000000e-03
  -2.3000000e-03
  -2.2500000e-03
  -2.2500000e-03
  -2.3000000e-03
  -2.3000000e-03
  -2.2200000e-03
  -2.1700000e-03
  -2.2800000e-03
  -2.2800000e-03
  -2.2500000e-03
  -2.1900000e-03
  -2.2200000e-03
  -2.3600000e-03
  -2.3300000e-03
  -2.2200000e-03
  -2.3000000e-03
  -2.3900000e-03
  -2.2200000e-03
  -2.2200000e-03
  -2.3300000e-03
  -2.3600000e-03
  -2.3600000e-03
  -2.2500000e-03
  -2.3300000e-03
  -2.3900000e-03
  -2.2500000e-03
  -2.2800000e-03
  -2.3300000e-03
  -2.3300000e-03
  -2.3000000e-03
  -2.2500000e-03
  -2.2800000e-03
  -2.2800000e-03
  -2.2200000e-03
  -2.2800000e-03
  -2.3300000e-03
  -2.3600000e-03
  -2.3300000e-03
  -2.2500000e-03
  -2.3600000e-03
  -2.4400000e-03
  -2.3000000e-03
  -2.2500000e-03
  -2.3600000e-03
  -2.3300000e-03
  -2.3000000e-03
  -2.2200000e-03
  -2.3000000e-03
  -2.3900000e-03
  -2.2200000e-03
  -2.2200000e-03
  -2.2500000e-03
  -2.3600000e-03
  -2.3000000e-03
  -2.2500000e-03
  -2.3600000e-03
  -2.3600000e-03
  -2.3000000e-03
  -2.2500000e-03
  -2.3900000e-03
  -2.3300000e-03
  -2.3000000e-03
  -2.2500000e-03
  -2.2800000e-03
  -2.3300000e-03
  -2.2800000e-03
  -2.2800000e-03
  -2.3900000e-03
  -2.3600000e-03
  -2.3300000e-03
  -2.2800000e-03
  -2.3900000e-03
  -2.3900000e-03
  -2.2800000e-03
  -2.2200000e-03
  -2.2200000e-03
  -2.2500000e-03
  -2.2800000e-03
  -2.2500000e-03
  -2.3000000e-03
  -2.3600000e-03
  -2.2500000e-03
  -2.1900000e-03
  -2.2800000e-03
  -2.3000000e-03
  -2.1700000e-03
  -2.2200000e-03
  -2.2800000e-03
  -2.3600000e-03
  -2.2500000e-03
  -2.1700000e-03
  -2.2800000e-03
  -2.3000000e-03
  -2.2200000e-03
  -2.2200000e-03
  -2.2500000e-03
  -2.3300000e-03
  -2.3000000e-03
  -2.2500000e-03
  -2.3300000e-03
  -2.3300000e-03
  -2.3000000e-03
  -2.3300000e-03
  -2.3600000e-03
  -2.3900000e-03
  -2.3900000e-03
  -2.2500000e-03
  -2.3900000e-03
  -2.3900000e-03
  -2.2800000e-03
  -2.3600000e-03
  -2.3900000e-03
  -2.3900000e-03
  -2.3600000e-03
  -2.2800000e-03
  -2.4400000e-03
  -2.3900000e-03
  -2.3000000e-03
  -2.3300000e-03
  -2.4100000e-03
  -2.4100000e-03
  -2.3300000e-03
  -2.2500000e-03
  -2.3900000e-03
  -2.3900000e-03
  -2.2800000e-03
  -2.2800000e-03
  -2.3600000e-03
  -2.3300000e-03
  -2.3300000e-03
  -2.2800000e-03
  -2.4100000e-03
  -2.4400000e-03
  -2.3300000e-03
  -2.3000000e-03
  -2.3900000e-03
  -2.3900000e-03
  -2.3300000e-03
  -2.2200000e-03
  -2.3000000e-03
  -2.4100000e-03
  -2.2500000e-03
  -2.2800000e-03
  -2.3300000e-03
  -2.3600000e-03
  -2.2500000e-03
  -2.1700000e-03
  -2.2800000e-03
  -2.3000000e-03
  -2.3000000e-03
  -2.2800000e-03
  -2.3600000e-03
  -2.3600000e-03
  -2.2800000e-03
  -2.2500000e-03
  -2.3600000e-03
  -2.4100000e-03
  -2.3000000e-03
  -2.2800000e-03
  -2.3300000e-03
  -2.3300000e-03
  -2.2500000e-03
  -2.2200000e-03
  -2.3000000e-03
  -2.3600000e-03
  -2.2500000e-03
  -2.2500000e-03
  -2.3600000e-03
  -2.3600000e-03
  -2.2500000e-03
  -2.3000000e-03
  -2.3600000e-03
  -2.4700000e-03
  -2.3300000e-03
  -2.2800000e-03
  -2.3900000e-03
  -2.3900000e-03
  -2.3000000e-03
  -2.3000000e-03
  -2.3600000e-03
  -2.3900000e-03
  -2.3000000e-03
  -2.2800000e-03
  -2.3900000e-03
  -2.3600000e-03
  -2.3000000e-03
  -2.3000000e-03
  -2.3900000e-03
  -2.4400000e-03
  -2.3000000e-03
  -2.2200000e-03
  -2.3900000e-03
  -2.3600000e-03
  -2.2800000e-03
  -2.3300000e-03
  -2.3600000e-03
  -2.4100000e-03
  -2.3300000e-03
  -2.2200000e-03
  -2.3600000e-03
  -2.3600000e-03
  -2.3300000e-03
  -2.3300000e-03
  -2.3900000e-03
  -2.4100000e-03
  -2.3600000e-03
  -2.2800000e-03
  -2.4100000e-03
  -2.4100000e-03
  -2.2200000e-03
  -2.3000000e-03
  -2.3900000e-03
  -2.3600000e-03
  -2.2800000e-03
  -2.2800000e-03
  -2.3600000e-03
  -2.3600000e-03
  -2.3000000e-03
  -2.2800000e-03
  -2.3600000e-03
  -2.3600000e-03
  -2.3600000e-03
  -2.3000000e-03
  -2.3300000e-03
  -2.3900000e-03
  -2.2800000e-03
  -2.2800000e-03
  -2.3900000e-03
  -2.4400000e-03
  -2.3600000e-03
  -2.3300000e-03
  -2.3900000e-03
  -2.4100000e-03
  -2.2500000e-03
  -2.2500000e-03
  -2.3300000e-03
  -2.3000000e-03
  -2.2500000e-03
  -2.2800000e-03
  -2.3000000e-03
  -2.3900000e-03
  -2.2200000e-03
  -2.2200000e-03
  -2.3900000e-03
  -2.3900000e-03
  -2.2800000e-03
  -2.2500000e-03
  -2.3000000e-03
  -2.3000000e-03
  -2.2500000e-03
  -2.1900000e-03
  -2.2800000e-03
  -2.2800000e-03
  -2.2500000e-03
  -2.1700000e-03
  -2.3000000e-03
  -2.3000000e-03
  -2.2200000e-03
  -2.2500000e-03
  -2.3900000e-03
  -2.3900000e-03
  -2.3300000e-03
  -2.2800000e-03
  -2.3600000e-03
  -2.3600000e-03
  -2.2500000e-03
  -2.2200000e-03
  -2.3300000e-03
  -2.3300000e-03
  -2.3000000e-03
  -2.3300000e-03
  -2.3900000e-03
  -2.3900000e-03
  -2.2200000e-03
  -2.1400000e-03
  -2.3300000e-03
  -2.2500000e-03
  -2.1900000e-03
  -2.2800000e-03
  -2.2800000e-03
  -2.3300000e-03
  -2.1900000e-03
  -2.2200000e-03
  -2.3300000e-03
  -2.3000000e-03
  -2.2200000e-03
  -2.2500000e-03
  -2.2800000e-03
  -2.3600000e-03
  -2.2200000e-03
  -2.1900000e-03
  -2.3600000e-03
  -2.2800000e-03
  -2.1900000e-03
  -2.2500000e-03
  -2.2800000e-03
  -2.2500000e-03
  -2.2500000e-03
  -2.2200000e-03
  -2.3600000e-03
  -2.4100000e-03
  -2.1900000e-03
  -2.3300000e-03
  -2.3900000e-03
  -2.3900000e-03
  -2.2800000e-03
  -2.2200000e-03
  -2.3000000e-03
  -2.4100000e-03
  -2.2200000e-03
  -2.2800000e-03
  -2.3000000e-03
  -2.2500000e-03
  -2.2800000e-03
  -2.2200000e-03
  -2.3300000e-03
  -2.3000000e-03
  -2.2500000e-03
  -2.3000000e-03
  -2.3000000e-03
  -2.3000000e-03
  -2.2800000e-03
  -2.2200000e-03
  -2.3000000e-03
  -2.3600000e-03
  -2.2200000e-03
  -2.2800000e-03
  -2.3300000e-03
  -2.2800000e-03
  -2.2500000e-03
  -2.1900000e-03
  -2.3000000e-03
  -2.2800000e-03
  -2.1400000e-03
  -2.1400000e-03
  -2.2800000e-03
  -2.3000000e-03
  -2.2200000e-03
  -2.2500000e-03
  -2.3300000e-03
  -2.3300000e-03
  -2.2800000e-03
  -2.3000000e-03
  -2.3900000e-03
  -2.4100000e-03
  -2.3300000e-03
  -2.3300000e-03
  -2.3600000e-03
  -2.3600000e-03
  -2.2200000e-03
  -2.2800000e-03
  -2.3900000e-03
  -2.3000000e-03
  -2.2500000e-03
  -2.2800000e-03
  -2.3300000e-03
  -2.3300000e-03
  -2.2800000e-03
  -2.2500000e-03
  -2.2800000e-03
  -2.2800000e-03
  -2.3000000e-03
  -2.3300000e-03
  -2.4400000e-03
  -2.5200000e-03
  -2.3900000e-03
  -2.3600000e-03
  -2.4400000e-03
  -2.4700000e-03
  -2.3600000e-03
  -2.3600000e-03
  -2.3600000e-03
  -2.3300000e-03
  -2.3000000e-03
  -2.3000000e-03
  -2.3900000e-03
  -2.3300000e-03
  -2.3000000e-03
  -2.3000000e-03
  -2.3900000e-03
  -2.3900000e-03
  -2.2500000e-03
  -2.2800000e-03
  -2.4400000e-03
  -2.3600000e-03
  -2.3300000e-03
  -2.2800000e-03
  -2.3300000e-03
  -2.3900000e-03
  -2.2200000e-03
  -2.2800000e-03
  -2.4100000e-03
  -2.3600000e-03
  -2.3000000e-03
  -2.4700000e-03
  -2.4400000e-03
  -2.4400000e-03
  -2.3300000e-03
  -2.2800000e-03
  -2.4400000e-03
  -2.4400000e-03
  -2.3300000e-03
  -2.3300000e-03
  -2.4400000e-03
  -2.4100000e-03
  -2.3900000e-03
  -2.3600000e-03
  -2.4400000e-03
  -2.4100000e-03
  -2.3300000e-03
  -2.3900000e-03
  -2.5000000e-03
  -2.4400000e-03
  -2.3000000e-03
  -2.3300000e-03
  -2.4400000e-03
  -2.3900000e-03
  -2.2800000e-03
  -2.3300000e-03
  -2.3900000e-03
  -2.2800000e-03
  -2.3000000e-03
  -2.2800000e-03
  -2.3300000e-03
  -2.3600000e-03
  -2.2200000e-03
  -2.2800000e-03
  -2.3600000e-03
  -2.3000000e-03
  -2.2200000e-03
  -2.2500000e-03
  -2.4100000e-03
  -2.3900000e-03
  -2.2500000e-03
  -2.2800000e-03
  -2.3900000e-03
  -2.3300000e-03
  -2.3300000e-03
  -2.3000000e-03
  -2.3300000e-03
  -2.3000000e-03
  -2.2500000e-03
  -2.3000000e-03
  -2.4100000e-03
  -2.3300000e-03
  -2.1900000e-03
  -2.2800000e-03
  -2.3000000e-03
  -2.3300000e-03
  -2.1900000e-03
  -2.2800000e-03
  -2.3900000e-03
  -2.3600000e-03
  -2.3000000e-03
  -2.2800000e-03
  -2.3900000e-03
  -2.3900000e-03
  -2.3300000e-03
  -2.3600000e-03
  -2.4100000e-03
  -2.3300000e-03
  -2.2500000e-03
  -2.3300000e-03
  -2.3600000e-03
  -2.3900000e-03
  -2.2800000e-03
  -2.3000000e-03
  -2.4100000e-03
  -2.3600000e-03
  -2.3600000e-03
  -2.3300000e-03
  -2.3900000e-03
  -2.3300000e-03
  -2.2500000e-03
  -2.3000000e-03
  -2.3900000e-03
  -2.2800000e-03
  -2.2800000e-03
  -2.2800000e-03
  -2.3000000e-03
  -2.4100000e-03
  -2.3000000e-03
  -2.3000000e-03
  -2.4400000e-03
  -2.3900000e-03
  -2.3000000e-03
  -2.4100000e-03
  -2.3900000e-03
  -2.3900000e-03
  -2.3300000e-03
  -2.3000000e-03
  -2.4400000e-03
  -2.4100000e-03
  -2.3300000e-03
  -2.3900000e-03
  -2.3300000e-03
  -2.3600000e-03
  -2.3900000e-03
  -2.2500000e-03
  -2.3600000e-03
  -2.3600000e-03
  -2.2200000e-03
  -2.2800000e-03
  -2.3300000e-03
  -2.3600000e-03
  -2.3600000e-03
  -2.3600000e-03
  -2.4100000e-03
  -2.3900000e-03
  -2.3000000e-03
  -2.3600000e-03
  -2.4400000e-03
  -2.3600000e-03
  -2.3000000e-03
  -2.3900000e-03
  -2.4100000e-03
  -2.3600000e-03
  -2.3300000e-03
  -2.3600000e-03
  -2.4100000e-03
  -2.3900000e-03
  -2.3900000e-03
  -2.3600000e-03
  -2.4400000e-03
  -2.4100000e-03
  -2.3000000e-03
  -2.4100000e-03
  -2.4100000e-03
  -2.3900000e-03
  -2.3600000e-03
  -2.3300000e-03
  -2.4700000e-03
  -2.4100000e-03
  -2.3900000e-03
  -2.3600000e-03
  -2.4400000e-03
  -2.3600000e-03
  -2.3000000e-03
  -2.3000000e-03
  -2.3900000e-03
  -2.3600000e-03
  -2.3000000e-03
  -2.3900000e-03
  -2.4100000e-03
  -2.3900000e-03
  -2.3300000e-03
  -2.3900000e-03
  -2.4400000e-03
  -2.3900000e-03
  -2.2800000e-03
  -2.3600000e-03
  -2.3900000e-03
  -2.3900000e-03
  -2.3300000e-03
  -2.3600000e-03
  -2.4400000e-03
  -2.4100000e-03
  -2.3300000e-03
  -2.3900000e-03
  -2.3900000e-03
  -2.3600000e-03
  -2.3900000e-03
  -2.4100000e-03
  -2.4100000e-03
  -2.4100000e-03
  -2.3300000e-03
  -2.3300000e-03
  -2.4100000e-03
  -2.3300000e-03
  -2.3300000e-03
  -2.3000000e-03
  -2.3900000e-03
  -2.3600000e-03
  -2.2800000e-03
  -2.3300000e-03
  -2.4400000e-03
  -2.3900000e-03
  -2.3000000e-03
  -2.3600000e-03
  -2.4100000e-03
  -2.3300000e-03
  -2.2500000e-03
  -2.2800000e-03
  -2.4700000e-03
  -2.3900000e-03
  -2.3300000e-03
  -2.4400000e-03
  -2.3900000e-03
  -2.3600000e-03
  -2.3000000e-03
  -2.3000000e-03
  -2.4400000e-03
  -2.3900000e-03
  -2.2500000e-03
  -2.4100000e-03
  -2.3900000e-03
  -2.3600000e-03
  -2.3600000e-03
  -2.3300000e-03
  -2.5000000e-03
  -2.4400000e-03
  -2.3600000e-03
  -2.4100000e-03
  -2.4700000e-03
  -2.4100000e-03
  -2.3000000e-03
  -2.3300000e-03
  -2.4100000e-03
  -2.3300000e-03
  -2.2800000e-03
  -2.4400000e-03
  -2.3600000e-03
  -2.2500000e-03
  -2.3300000e-03
  -2.3300000e-03
  -2.3600000e-03
  -2.3300000e-03
  -2.2800000e-03
  -2.3000000e-03
  -2.4700000e-03
  -2.4100000e-03
  -2.3900000e-03
  -2.3900000e-03
  -2.4100000e-03
  -2.3000000e-03
  -2.2500000e-03
  -2.3600000e-03
  -2.4100000e-03
  -2.3900000e-03
  -2.2800000e-03
  -2.3600000e-03
  -2.4700000e-03
  -2.4100000e-03
  -2.2800000e-03
  -2.3300000e-03
  -2.4100000e-03
  -2.3300000e-03
  -2.3300000e-03
  -2.4100000e-03
  -2.4400000e-03
  -2.3600000e-03
  -2.3300000e-03
  -2.4400000e-03
  -2.4400000e-03
  -2.3000000e-03
  -2.3000000e-03
  -2.3600000e-03
  -2.4100000e-03
  -2.3600000e-03
  -2.2800000e-03
  -2.3600000e-03
  -2.4100000e-03
  -2.3900000e-03
  -2.3300000e-03
  -2.4400000e-03
  -2.5000000e-03
  -2.4100000e-03
  -2.3600000e-03
  -2.4700000e-03
  -2.5200000e-03
  -2.3900000e-03
  -2.3300000e-03
  -2.3900000e-03
  -2.4100000e-03
  -2.3600000e-03
  -2.2500000e-03
  -2.2800000e-03
  -2.4700000e-03
  -2.3900000e-03
  -2.3300000e-03
  -2.3600000e-03
  -2.3300000e-03
  -2.3900000e-03
  -2.2800000e-03
  -2.3900000e-03
  -2.4400000e-03
  -2.3300000e-03
  -2.3300000e-03
  -2.3900000e-03
  -2.3600000e-03
  -2.3600000e-03
  -2.3300000e-03
  -2.3600000e-03
  -2.4100000e-03
  -2.3600000e-03
  -2.3300000e-03
  -2.4100000e-03
  -2.4100000e-03
  -2.3600000e-03
  -2.3000000e-03
  -2.3300000e-03
  -2.4400000e-03
  -2.3000000e-03
  -2.3300000e-03
  -2.4100000e-03
  -2.3600000e-03
  -2.3300000e-03
  -2.3000000e-03
  -2.3300000e-03
  -2.4100000e-03
  -2.3600000e-03
  -2.2200000e-03
  -2.3600000e-03
  -2.3900000e-03
  -2.3300000e-03
  -2.3600000e-03
  -2.3600000e-03
  -2.4700000e-03
  -2.4100000e-03
  -2.3300000e-03
  -2.4700000e-03
  -2.5000000e-03
  -2.4100000e-03
  -2.3900000e-03
  -2.3900000e-03
  -2.4700000e-03
  -2.4400000e-03
  -2.4400000e-03
  -2.5200000e-03
  -2.5000000e-03
  -2.3900000e-03
  -2.3900000e-03
  -2.3900000e-03
  -2.4700000e-03
  -2.5000000e-03
  -2.3900000e-03
  -2.4700000e-03
  -2.4700000e-03
  -2.4700000e-03
  -2.4700000e-03
  -2.4700000e-03
  -2.5200000e-03
  -2.4700000e-03
  -2.3600000e-03
  -2.4700000e-03
  -2.4400000e-03
  -2.3900000e-03
  -2.4100000e-03
  -2.4400000e-03
  -2.5500000e-03
  -2.5000000e-03
  -2.4100000e-03
  -2.4700000e-03
  -2.5200000e-03
  -2.4100000e-03
  -2.3900000e-03
  -2.4100000e-03
  -2.4700000e-03
  -2.3600000e-03
  -2.2500000e-03
  -2.4100000e-03
  -2.4400000e-03
  -2.3000000e-03
  -2.2800000e-03
  -2.4400000e-03
  -2.4400000e-03
  -2.3900000e-03
  -2.3600000e-03
  -2.3900000e-03
  -2.4700000e-03
  -2.3900000e-03
  -2.4100000e-03
  -2.4400000e-03
  -2.4400000e-03
  -2.4100000e-03
  -2.3300000e-03
  -2.3900000e-03
  -2.5000000e-03
  -2.3600000e-03
  -2.3600000e-03
  -2.4400000e-03
  -2.4700000e-03
  -2.5000000e-03
  -2.4700000e-03
  -2.5000000e-03
  -2.5200000e-03
  -2.4700000e-03
  -2.4400000e-03
  -2.5200000e-03
  -2.5200000e-03
  -2.3900000e-03
  -2.3300000e-03
  -2.5200000e-03
  -2.5500000e-03
  -2.4100000e-03
  -2.3900000e-03
  -2.4400000e-03
  -2.4700000e-03
  -2.4100000e-03
  -2.3600000e-03
  -2.3600000e-03
  -2.4700000e-03
  -2.4400000e-03
  -2.3300000e-03
  -2.4700000e-03
  -2.4700000e-03
  -2.3600000e-03
  -2.3300000e-03
  -2.4700000e-03
  -2.4700000e-03
  -2.3600000e-03
  -2.3300000e-03
  -2.4100000e-03
  -2.3900000e-03
  -2.3600000e-03
  -2.3600000e-03
  -2.3600000e-03
  -2.4700000e-03
  -2.3900000e-03
  -2.3000000e-03
  -2.3600000e-03
  -2.3900000e-03
  -2.3600000e-03
  -2.3300000e-03
  -2.3900000e-03
  -2.4400000e-03
  -2.3600000e-03
  -2.3000000e-03
  -2.4400000e-03
  -2.4400000e-03
  -2.3300000e-03
  -2.3900000e-03
  -2.4100000e-03
  -2.3900000e-03
  -2.3600000e-03
  -2.3900000e-03
  -2.4400000e-03
  -2.4100000e-03
  -2.3600000e-03
  -2.3900000e-03
  -2.4400000e-03
  -2.4400000e-03
  -2.3600000e-03
  -2.3300000e-03
  -2.4400000e-03
  -2.4400000e-03
  -2.3300000e-03
  -2.3000000e-03
  -2.4700000e-03
  -2.4100000e-03
  -2.3900000e-03
  -2.3300000e-03
  -2.4400000e-03
  -2.4400000e-03
  -2.3600000e-03
  -2.3300000e-03
  -2.4100000e-03
  -2.3600000e-03
  -2.3300000e-03
  -2.3300000e-03
  -2.4100000e-03
  -2.4400000e-03
  -2.3600000e-03
  -2.4100000e-03
  -2.4400000e-03
  -2.4400000e-03
  -2.4400000e-03
  -2.3300000e-03
  -2.4400000e-03
  -2.5000000e-03
  -2.2800000e-03
  -2.3000000e-03
  -2.3900000e-03
  -2.3900000e-03
  -2.3600000e-03
  -2.3600000e-03
  -2.4700000e-03
  -2.5000000e-03
  -2.3300000e-03
  -2.3300000e-03
  -2.4400000e-03
  -2.4100000e-03
  -2.3600000e-03
  -2.3300000e-03
  -2.3300000e-03
  -2.4400000e-03
  -2.3600000e-03
  -2.3300000e-03
  -2.5200000e-03
  -2.3900000e-03
  -2.3600000e-03
  -2.3300000e-03
  -2.3900000e-03
  -2.4400000e-03
  -2.3600000e-03
  -2.3600000e-03
  -2.5000000e-03
  -2.4700000e-03
  -2.3600000e-03
  -2.3600000e-03
  -2.4100000e-03
  -2.4700000e-03
  -2.3600000e-03
  -2.2500000e-03
  -2.3900000e-03
  -2.3900000e-03
  -2.2500000e-03
  -2.3600000e-03
  -2.3900000e-03
  -2.4100000e-03
  -2.3900000e-03
  -2.3000000e-03
  -2.4400000e-03
  -2.4100000e-03
  -2.3300000e-03
  -2.3600000e-03
  -2.4100000e-03
  -2.3600000e-03
  -2.3300000e-03
  -2.3600000e-03
  -2.4100000e-03
  -2.4700000e-03
  -2.3600000e-03
  -2.3600000e-03
  -2.4400000e-03
  -2.4700000e-03
  -2.3900000e-03
  -2.3000000e-03
  -2.3900000e-03
  -2.3900000e-03
  -2.3000000e-03
  -2.3300000e-03
  -2.4400000e-03
  -2.4100000e-03
  -2.3600000e-03
  -2.2800000e-03
  -2.4100000e-03
  -2.3900000e-03
  -2.3300000e-03
  -2.3600000e-03
  -2.3900000e-03
  -2.3000000e-03
  -2.3000000e-03
  -2.2800000e-03
  -2.4100000e-03
  -2.3900000e-03
  -2.2500000e-03
  -2.3000000e-03
  -2.3900000e-03
  -2.3900000e-03
  -2.3000000e-03
  -2.3000000e-03
  -2.5000000e-03
  -2.4700000e-03
  -2.3300000e-03
  -2.3300000e-03
  -2.4100000e-03
  -2.4100000e-03
  -2.3900000e-03
  -2.3000000e-03
  -2.4100000e-03
  -2.4400000e-03
  -2.3300000e-03
  -2.3600000e-03
  -2.4100000e-03
  -2.3600000e-03
  -2.3600000e-03
  -2.3000000e-03
  -2.3900000e-03
  -2.4400000e-03
  -2.3300000e-03
  -2.3600000e-03
  -2.4700000e-03
  -2.3600000e-03
  -2.3600000e-03
  -2.3600000e-03
  -2.3900000e-03
  -2.4400000e-03
  -2.3000000e-03
  -2.3600000e-03
  -2.4400000e-03
  -2.3600000e-03
  -2.2500000e-03
  -2.2800000e-03
  -2.3600000e-03
  -2.4100000e-03
  -2.3000000e-03
  -2.2800000e-03
  -2.4400000e-03
  -2.4400000e-03
  -2.3300000e-03
  -2.3300000e-03
  -2.3900000e-03
  -2.4100000e-03
  -2.3000000e-03
  -2.3000000e-03
  -2.4700000e-03
  -2.4400000e-03
  -2.3300000e-03
  -2.3600000e-03
  -2.4400000e-03
  -2.5000000e-03
  -2.4100000e-03
  -2.3900000e-03
  -2.4100000e-03
  -2.4100000e-03
  -2.3300000e-03
  -2.3900000e-03
  -2.4400000e-03
  -2.4100000e-03
  -2.3900000e-03
  -2.3600000e-03
  -2.5000000e-03
  -2.4700000e-03
  -2.3600000e-03
  -2.4100000e-03
  -2.4400000e-03
  -2.4700000e-03
  -2.4100000e-03
  -2.3900000e-03
  -2.5000000e-03
  -2.5000000e-03
  -2.4400000e-03
  -2.4100000e-03
  -2.4100000e-03
  -2.4400000e-03
  -2.4400000e-03
  -2.4100000e-03
  -2.4700000e-03
  -2.3900000e-03
  -2.3300000e-03
  -2.3600000e-03
  -2.5000000e-03
  -2.4700000e-03
  -2.3900000e-03
  -2.4100000e-03
  -2.5000000e-03
  -2.4400000e-03
  -2.3300000e-03
  -2.3900000e-03
  -2.4100000e-03
  -2.4100000e-03
  -2.3300000e-03
  -2.2800000e-03
  -2.4700000e-03
  -2.4100000e-03
  -2.2800000e-03
  -2.3600000e-03
  -2.3900000e-03
  -2.4400000e-03
  -2.3600000e-03
  -2.3300000e-03
  -2.4400000e-03
  -2.4400000e-03
  -2.2500000e-03
  -2.3900000e-03
  -2.4400000e-03
  -2.3900000e-03
  -2.3900000e-03
  -2.3900000e-03
  -2.5000000e-03
  -2.4700000e-03
  -2.2800000e-03
  -2.3600000e-03
  -2.4400000e-03
  -2.4700000e-03
  -2.4100000e-03
  -2.3000000e-03
  -2.4100000e-03
  -2.3900000e-03
  -2.2800000e-03
  -2.3300000e-03
  -2.4100000e-03
  -2.3000000e-03
  -2.2800000e-03
  -2.3000000e-03
  -2.3600000e-03
  -2.4100000e-03
  -2.3000000e-03
  -2.3900000e-03
  -2.4400000e-03
  -2.3600000e-03
  -2.3600000e-03
  -2.3900000e-03
  -2.4700000e-03
  -2.3900000e-03
  -2.3000000e-03
  -2.3600000e-03
  -2.4400000e-03
  -2.3900000e-03
  -2.3300000e-03
  -2.3600000e-03
  -2.4100000e-03
  -2.3900000e-03
  -2.2800000e-03
  -2.3300000e-03
  -2.5000000e-03
  -2.4700000e-03
  -2.3000000e-03
  -2.3000000e-03
  -2.3300000e-03
  -2.2800000e-03
  -2.2800000e-03
  -2.3000000e-03
  -2.4400000e-03
  -2.3300000e-03
  -2.2800000e-03
  -2.3000000e-03
  -2.3900000e-03
  -2.3900000e-03
  -2.2800000e-03
  -2.3000000e-03
  -2.4100000e-03
  -2.3300000e-03
  -2.3000000e-03
  -2.3000000e-03
  -2.3900000e-03
  -2.3600000e-03
  -2.3000000e-03
  -2.3000000e-03
  -2.4100000e-03
  -2.3600000e-03
  -2.3600000e-03
  -2.4400000e-03
  -2.3900000e-03
  -2.3600000e-03
  -2.2800000e-03
  -2.3000000e-03
  -2.4100000e-03
  -2.3600000e-03
  -2.3300000e-03
  -2.3600000e-03
  -2.3600000e-03
  -2.3600000e-03
  -2.3000000e-03
  -2.2800000e-03
  -2.4100000e-03
  -2.3000000e-03
  -2.2200000e-03
  -2.3900000e-03
  -2.3900000e-03
  -2.3600000e-03
  -2.3300000e-03
  -2.3300000e-03
  -2.4100000e-03
  -2.3000000e-03
  -2.2800000e-03
  -2.3000000e-03
  -2.3000000e-03
  -2.3300000e-03
  -2.2500000e-03
  -2.3000000e-03
  -2.4400000e-03
  -2.3900000e-03
  -2.3300000e-03
  -2.4100000e-03
  -2.4700000e-03
  -2.3600000e-03
  -2.3900000e-03
  -2.3300000e-03
  -2.4400000e-03
  -2.4100000e-03
  -2.3000000e-03
  -2.3300000e-03
  -2.4100000e-03
  -2.3300000e-03
  -2.3000000e-03
  -2.3900000e-03
  -2.3600000e-03
  -2.3900000e-03
  -2.3000000e-03
  -2.3900000e-03
  -2.5000000e-03
  -2.4100000e-03
  -2.3900000e-03
  -2.3900000e-03
  -2.4400000e-03
  -2.4700000e-03
  -2.3600000e-03
  -2.3600000e-03
  -2.4400000e-03
  -2.3900000e-03
  -2.3900000e-03
  -2.4400000e-03
  -2.4700000e-03
  -2.4700000e-03
  -2.3600000e-03
  -2.3900000e-03
  -2.4400000e-03
  -2.3600000e-03
  -2.3000000e-03
  -2.3600000e-03
  -2.4100000e-03
  -2.4400000e-03
  -2.3300000e-03
  -2.3900000e-03
  -2.5500000e-03
  -2.4100000e-03
  -2.3300000e-03
  -2.3600000e-03
  -2.4100000e-03
  -2.3900000e-03
  -2.2500000e-03
  -2.3300000e-03
  -2.4100000e-03
  -2.3600000e-03
  -2.2800000e-03
  -2.3300000e-03
  -2.3900000e-03
  -2.4700000e-03
  -2.3600000e-03
  -2.3600000e-03
  -2.4400000e-03
  -2.3900000e-03
  -2.2800000e-03
  -2.3300000e-03
  -2.3600000e-03
  -2.3300000e-03
  -2.3000000e-03
  -2.3600000e-03
  -2.4100000e-03
  -2.3300000e-03
  -2.2800000e-03
  -2.3900000e-03
  -2.4100000e-03
  -2.3900000e-03
  -2.3000000e-03
  -2.3300000e-03
  -2.4700000e-03
  -2.4400000e-03
  -2.3600000e-03
  -2.3900000e-03
  -2.4400000e-03
  -2.4100000e-03
  -2.3600000e-03
  -2.3600000e-03
  -2.4400000e-03
  -2.4400000e-03
  -2.3600000e-03
  -2.4700000e-03
  -2.4100000e-03
  -2.3600000e-03
  -2.3300000e-03
  -2.3600000e-03
  -2.5000000e-03
  -2.4400000e-03
  -2.3300000e-03
  -2.3300000e-03
  -2.4700000e-03
  -2.3600000e-03
  -2.3000000e-03
  -2.2800000e-03
  -2.3000000e-03
  -2.3300000e-03
  -2.2200000e-03
  -2.3000000e-03
  -2.3600000e-03
  -2.3300000e-03
  -2.3300000e-03
  -2.3600000e-03
  -2.4100000e-03
  -2.3000000e-03
  -2.2500000e-03
  -2.3600000e-03
  -2.4400000e-03
  -2.4400000e-03
  -2.3900000e-03
  -2.3900000e-03
  -2.5000000e-03
  -2.4700000e-03
  -2.3300000e-03
  -2.3600000e-03
  -2.5000000e-03
  -2.4100000e-03
  -2.3000000e-03
  -2.3300000e-03
  -2.3900000e-03
  -2.4100000e-03
  -2.3000000e-03
  -2.4100000e-03
  -2.5000000e-03
  -2.3300000e-03
  -2.3300000e-03
  -2.4400000e-03
  -2.4700000e-03
  -2.4100000e-03
  -2.3900000e-03
  -2.4400000e-03
  -2.5800000e-03
  -2.4400000e-03
  -2.3000000e-03
  -2.3600000e-03
  -2.4100000e-03
  -2.3900000e-03
  -2.3000000e-03
  -2.3600000e-03
  -2.4400000e-03
  -2.3900000e-03
  -2.3300000e-03
  -2.3600000e-03
  -2.3900000e-03
  -2.3600000e-03
  -2.2800000e-03
  -2.4400000e-03
  -2.4400000e-03
  -2.3600000e-03
  -2.3600000e-03
  -2.4100000e-03
  -2.4700000e-03
  -2.3600000e-03
  -2.3600000e-03
  -2.3600000e-03
  -2.4400000e-03
  -2.3300000e-03
  -2.2800000e-03
  -2.3600000e-03
  -2.3600000e-03
  -2.3300000e-03
  -2.2800000e-03
  -2.3000000e-03
  -2.4400000e-03
  -2.2800000e-03
  -2.2200000e-03
  -2.3600000e-03
  -2.3900000e-03
  -2.4100000e-03
  -2.3600000e-03
  -2.3900000e-03
  -2.4700000e-03
  -2.4400000e-03
  -2.3900000e-03
  -2.4400000e-03
  -2.3600000e-03
  -2.3600000e-03
  -2.3600000e-03
  -2.3300000e-03
  -2.4400000e-03
  -2.3900000e-03
  -2.2800000e-03
  -2.4400000e-03
  -2.4100000e-03
  -2.3600000e-03
  -2.3000000e-03
  -2.3000000e-03
  -2.4100000e-03
  -2.3900000e-03
  -2.3000000e-03
  -2.3900000e-03
  -2.4100000e-03
  -2.3900000e-03
  -2.3900000e-03
  -2.4100000e-03
  -2.5200000e-03
  -2.4400000e-03
  -2.3000000e-03
  -2.4400000e-03
  -2.5200000e-03
  -2.3600000e-03
  -2.3300000e-03
  -2.4700000e-03
  -2.4400000e-03
  -2.4100000e-03
  -2.3600000e-03
  -2.4700000e-03
  -2.5200000e-03
  -2.4400000e-03
  -2.3900000e-03
  -2.4700000e-03
  -2.4700000e-03
  -2.4100000e-03
  -2.3600000e-03
  -2.4400000e-03
  -2.6000000e-03
  -2.4400000e-03
  -2.4400000e-03
  -2.5000000e-03
  -2.5500000e-03
  -2.5200000e-03
  -2.3900000e-03
  -2.5000000e-03
  -2.5800000e-03
  -2.3900000e-03
  -2.3900000e-03
  -2.4700000e-03
  -2.4100000e-03
  -2.4100000e-03
  -2.3000000e-03
  -2.3900000e-03
  -2.4100000e-03
  -2.3300000e-03
  -2.3600000e-03
  -2.4100000e-03
  -2.4400000e-03
  -2.4100000e-03
  -2.3000000e-03
  -2.3300000e-03
  -2.4400000e-03
  -2.3900000e-03
  -2.3000000e-03
  -2.4100000e-03
  -2.4700000e-03
  -2.3300000e-03
  -2.2800000e-03
  -2.3600000e-03
  -2.3900000e-03
  -2.3300000e-03
  -2.3000000e-03
  -2.3600000e-03
  -2.3600000e-03
  -2.3300000e-03
  -2.2500000e-03
  -2.3000000e-03
  -2.3900000e-03
  -2.2800000e-03
  -2.2200000e-03
  -2.3600000e-03
  -2.3000000e-03
  -2.3600000e-03
  -2.3300000e-03
  -2.3000000e-03
  -2.4400000e-03
  -2.3000000e-03
  -2.2800000e-03
  -2.3900000e-03
  -2.3300000e-03
  -2.3000000e-03
  -2.3600000e-03
  -2.3900000e-03
  -2.5000000e-03
  -2.4100000e-03
  -2.3300000e-03
  -2.4100000e-03
  -2.4100000e-03
  -2.4100000e-03
  -2.2800000e-03
  -2.3300000e-03
  -2.4700000e-03
  -2.3300000e-03
  -2.2800000e-03
  -2.4400000e-03
  -2.4400000e-03
  -2.3000000e-03
  -2.3600000e-03
  -2.4100000e-03
  -2.4400000e-03
  -2.3600000e-03
  -2.3000000e-03
  -2.3900000e-03
  -2.3900000e-03
  -2.3600000e-03
  -2.3600000e-03
  -2.3600000e-03
  -2.3600000e-03
  -2.3000000e-03
  -2.3300000e-03
  -2.5000000e-03
  -2.4100000e-03
  -2.3300000e-03
  -2.3000000e-03
  -2.3900000e-03
  -2.3900000e-03
  -2.3300000e-03
  -2.3000000e-03
  -2.3900000e-03
  -2.4400000e-03
  -2.3300000e-03
  -2.2800000e-03
  -2.3300000e-03
  -2.4100000e-03
  -2.3600000e-03
  -2.3000000e-03
  -2.3300000e-03
  -2.4700000e-03
  -2.3300000e-03
  -2.2800000e-03
  -2.2800000e-03
  -2.4100000e-03
  -2.3900000e-03
  -2.2800000e-03
  -2.3300000e-03
  -2.4400000e-03
  -2.3600000e-03
  -2.3600000e-03
  -2.3900000e-03
  -2.4100000e-03
  -2.3900000e-03
  -2.3900000e-03
  -2.5000000e-03
  -2.5000000e-03
  -2.3900000e-03
  -2.4400000e-03
  -2.5000000e-03
  -2.4400000e-03
  -2.4100000e-03
  -2.3900000e-03
  -2.5000000e-03
  -2.5800000e-03
  -2.3900000e-03
  -2.4100000e-03
  -2.4400000e-03
  -2.3900000e-03
  -2.3900000e-03
  -2.2800000e-03
  -2.4100000e-03
  -2.4100000e-03
  -2.3000000e-03
  -2.3000000e-03
  -2.4100000e-03
  -2.4700000e-03
  -2.3900000e-03
  -2.3300000e-03
  -2.4100000e-03
  -2.4400000e-03
  -2.3000000e-03
  -2.3000000e-03
  -2.4700000e-03
  -2.4100000e-03
  -2.3300000e-03
  -2.3600000e-03
  -2.3900000e-03
  -2.5800000e-03
  -2.4100000e-03
  -2.3000000e-03
  -2.3900000e-03
  -2.3600000e-03
  -2.3600000e-03
  -2.3000000e-03
  -2.3900000e-03
  -2.5000000e-03
  -2.3600000e-03
  -2.3000000e-03
  -2.4400000e-03
  -2.3900000e-03
  -2.3300000e-03
  -2.3300000e-03
  -2.4100000e-03
  -2.5000000e-03
  -2.3000000e-03
  -2.2200000e-03
  -2.4100000e-03
  -2.4100000e-03
  -2.2800000e-03
  -2.3300000e-03
  -2.3900000e-03
  -2.3900000e-03
  -2.2500000e-03
  -2.2200000e-03
  -2.4100000e-03
  -2.4400000e-03
  -2.3000000e-03
  -2.3900000e-03
  -2.5000000e-03
  -2.4700000e-03
  -2.4100000e-03
  -2.3600000e-03
  -2.4400000e-03
  -2.4700000e-03
  -2.4100000e-03
  -2.4700000e-03
  -2.5000000e-03
  -2.4700000e-03
  -2.3900000e-03
  -2.3300000e-03
  -2.4100000e-03
  -2.5000000e-03
  -2.3600000e-03
  -2.4100000e-03
  -2.5000000e-03
  -2.4400000e-03
  -2.4100000e-03
  -2.3300000e-03
  -2.4100000e-03
  -2.4400000e-03
  -2.3000000e-03
  -2.3600000e-03
  -2.4400000e-03
  -2.4100000e-03
  -2.3300000e-03
  -2.3900000e-03
  -2.5500000e-03
  -2.5200000e-03
  -2.4100000e-03
  -2.3600000e-03
  -2.4400000e-03
  -2.4400000e-03
  -2.3600000e-03
  -2.3300000e-03
  -2.3600000e-03
  -2.4700000e-03
  -2.3000000e-03
  -2.3000000e-03
  -2.3600000e-03
  -2.3900000e-03
  -2.3900000e-03
  -2.3600000e-03
  -2.4700000e-03
  -2.4400000e-03
  -2.2500000e-03
  -2.3600000e-03
  -2.4100000e-03
  -2.3600000e-03
  -2.3300000e-03
  -2.3000000e-03
  -2.4400000e-03
  -2.4400000e-03
  -2.3000000e-03
  -2.3900000e-03
  -2.5000000e-03
  -2.4700000e-03
  -2.4100000e-03
  -2.3600000e-03
  -2.3900000e-03
  -2.4400000e-03
  -2.3000000e-03
  -2.3300000e-03
  -2.4100000e-03
  -2.3300000e-03
  -2.3900000e-03
  -2.4400000e-03
  -2.4100000e-03
  -2.4400000e-03
  -2.3600000e-03
  -2.3600000e-03
  -2.5000000e-03
  -2.4700000e-03
  -2.3900000e-03
  -2.4400000e-03
  -2.5000000e-03
  -2.4700000e-03
  -2.3900000e-03
  -2.3600000e-03
  -2.5200000e-03
  -2.5000000e-03
  -2.4100000e-03
  -2.4100000e-03
  -2.4100000e-03
  -2.4700000e-03
  -2.3900000e-03
  -2.3300000e-03
  -2.5000000e-03
  -2.4400000e-03
  -2.3600000e-03
  -2.4700000e-03
  -2.3900000e-03
  -2.4700000e-03
  -2.3900000e-03
  -2.3300000e-03
  -2.3900000e-03
  -2.4100000e-03
  -2.3300000e-03
  -2.3600000e-03
  -2.4100000e-03
  -2.3900000e-03
  -2.3900000e-03
  -2.3600000e-03
  -2.4100000e-03
  -2.4100000e-03
  -2.3900000e-03
  -2.3600000e-03
  -2.4100000e-03
  -2.4100000e-03
  -2.3000000e-03
  -2.3600000e-03
  -2.4700000e-03
  -2.3900000e-03
  -2.3900000e-03
  -2.3900000e-03
  -2.4400000e-03
  -2.4400000e-03
  -2.4100000e-03
  -2.4400000e-03
  -2.5000000e-03
  -2.5000000e-03
  -2.3900000e-03
  -2.3900000e-03
  -2.4400000e-03
  -2.4400000e-03
  -2.3600000e-03
  -2.2800000e-03
  -2.3900000e-03
  -2.3600000e-03
  -2.3300000e-03
  -2.3300000e-03
  -2.3900000e-03
  -2.4400000e-03
  -2.3300000e-03
  -2.3000000e-03
  -2.4400000e-03
  -2.4400000e-03
  -2.2800000e-03
  -2.3900000e-03
  -2.4400000e-03
  -2.3900000e-03
  -2.4100000e-03
  -2.3600000e-03
  -2.5000000e-03
  -2.4100000e-03
  -2.2200000e-03
  -2.3000000e-03
  -2.3900000e-03
  -2.3300000e-03
  -2.3300000e-03
  -2.2500000e-03
  -2.3300000e-03
  -2.4100000e-03
  -2.2200000e-03
  -2.3600000e-03
  -2.4100000e-03
  -2.3600000e-03
  -2.3000000e-03
  -2.2800000e-03
  -2.3900000e-03
  -2.4100000e-03
  -2.3300000e-03
  -2.3900000e-03
  -2.5200000e-03
  -2.4400000e-03
  -2.4400000e-03
  -2.3900000e-03
  -2.3900000e-03
  -2.5000000e-03
  -2.3600000e-03
  -2.3600000e-03
  -2.5200000e-03
  -2.4700000e-03
  -2.4100000e-03
  -2.3900000e-03
  -2.4400000e-03
  -2.4100000e-03
  -2.3600000e-03
  -2.3000000e-03
  -2.5000000e-03
  -2.4700000e-03
  -2.3900000e-03
  -2.4700000e-03
  -2.4700000e-03
  -2.5000000e-03
  -2.4100000e-03
  -2.3600000e-03
  -2.4700000e-03
  -2.4100000e-03
  -2.3900000e-03
  -2.3900000e-03
  -2.4400000e-03
  -2.4400000e-03
  -2.3900000e-03
  -2.4100000e-03
  -2.5000000e-03
  -2.4400000e-03
  -2.3600000e-03
  -2.4100000e-03
  -2.4700000e-03
  -2.4700000e-03
  -2.4400000e-03
  -2.5000000e-03
  -2.5200000e-03
  -2.4700000e-03
  -2.3600000e-03
  -2.4100000e-03
  -2.4400000e-03
  -2.4400000e-03
  -2.3900000e-03
  -2.3600000e-03
  -2.4700000e-03
  -2.4700000e-03
  -2.3600000e-03
  -2.3900000e-03
  -2.4700000e-03
  -2.4100000e-03
  -2.3300000e-03
  -2.3600000e-03
  -2.4400000e-03
  -2.3900000e-03
  -2.3000000e-03
  -2.3300000e-03
  -2.4100000e-03
  -2.3900000e-03
  -2.3900000e-03
  -2.4100000e-03
  -2.4100000e-03
  -2.4400000e-03
  -2.3300000e-03
  -2.4100000e-03
  -2.5000000e-03
  -2.4400000e-03
  -2.4100000e-03
  -2.4100000e-03
  -2.4700000e-03
  -2.3900000e-03
  -2.2500000e-03
  -2.3600000e-03
  -2.4400000e-03
  -2.4100000e-03
  -2.4400000e-03
  -2.4400000e-03
  -2.5200000e-03
  -2.5000000e-03
  -2.3600000e-03
  -2.4400000e-03
  -2.5800000e-03
  -2.5000000e-03
  -2.5000000e-03
  -2.5000000e-03
  -2.4700000e-03
  -2.5000000e-03
  -2.3600000e-03
  -2.3900000e-03
  -2.5000000e-03
  -2.3900000e-03
  -2.3300000e-03
  -2.4400000e-03
  -2.4400000e-03
  -2.5000000e-03
  -2.3300000e-03
  -2.4700000e-03
  -2.6000000e-03
  -2.5000000e-03
  -2.4100000e-03
  -2.4700000e-03
  -2.5200000e-03
  -2.4700000e-03
  -2.3900000e-03
  -2.4100000e-03
  -2.5200000e-03
  -2.4700000e-03
  -2.5000000e-03
  -2.5200000e-03
  -2.5500000e-03
  -2.5200000e-03
  -2.4400000e-03
  -2.5200000e-03
  -2.6300000e-03
  -2.5500000e-03
  -2.3900000e-03
  -2.4100000e-03
  -2.4700000e-03
  -2.3900000e-03
  -2.3900000e-03
  -2.4100000e-03
  -2.5200000e-03
  -2.4700000e-03
  -2.4100000e-03
  -2.3900000e-03
  -2.4700000e-03
  -2.4700000e-03
  -2.3600000e-03
  -2.4400000e-03
  -2.5200000e-03
  -2.5200000e-03
  -2.4100000e-03
  -2.4700000e-03
  -2.5800000e-03
  -2.5500000e-03
  -2.4100000e-03
  -2.4400000e-03
  -2.5000000e-03
  -2.4700000e-03
  -2.4400000e-03
  -2.5200000e-03
  -2.6300000e-03
  -2.5500000e-03
  -2.5000000e-03
  -2.5200000e-03
  -2.5800000e-03
  -2.5500000e-03
  -2.4700000e-03
  -2.6000000e-03
  -2.6000000e-03
  -2.5200000e-03
  -2.4400000e-03
  -2.4700000e-03
  -2.5200000e-03
  -2.5000000e-03
  -2.3900000e-03
  -2.5000000e-03
  -2.5000000e-03
  -2.4400000e-03
  -2.3900000e-03
  -2.4100000e-03
  -2.5000000e-03
  -2.4400000e-03
  -2.3900000e-03
  -2.5200000e-03
  -2.5200000e-03
  -2.4700000e-03
  -2.4100000e-03
  -2.4700000e-03
  -2.5000000e-03
  -2.4400000e-03
  -2.3000000e-03
  -2.4100000e-03
  -2.5500000e-03
  -2.3600000e-03
  -2.3600000e-03
  -2.3600000e-03
  -2.4100000e-03
  -2.4400000e-03
  -2.3000000e-03
  -2.4100000e-03
  -2.5200000e-03
  -2.4400000e-03
  -2.4100000e-03
  -2.4100000e-03
  -2.4700000e-03
  -2.4700000e-03
  -2.3600000e-03
  -2.4100000e-03
  -2.5200000e-03
  -2.4400000e-03
  -2.3600000e-03
  -2.3900000e-03
  -2.4100000e-03
  -2.5000000e-03
  -2.4700000e-03
  -2.4700000e-03
  -2.5500000e-03
  -2.4700000e-03
  -2.3900000e-03
  -2.3900000e-03
  -2.4700000e-03
  -2.4100000e-03
  -2.3000000e-03
  -2.3900000e-03
  -2.5200000e-03
  -2.4100000e-03
  -2.3900000e-03
  -2.5200000e-03
  -2.4700000e-03
  -2.4100000e-03
  -2.3900000e-03
  -2.3900000e-03
  -2.5200000e-03
  -2.4400000e-03
  -2.3900000e-03
  -2.4100000e-03
  -2.4400000e-03
  -2.4700000e-03
  -2.3600000e-03
  -2.4100000e-03
  -2.4700000e-03
  -2.3600000e-03
  -2.3600000e-03
  -2.4400000e-03
  -2.4700000e-03
  -2.4100000e-03
  -2.3300000e-03
  -2.3900000e-03
  -2.4700000e-03
  -2.4400000e-03
  -2.4100000e-03
  -2.4700000e-03
  -2.5500000e-03
  -2.4700000e-03
  -2.3900000e-03
  -2.3900000e-03
  -2.4700000e-03
  -2.5000000e-03
  -2.3900000e-03
  -2.4100000e-03
  -2.4100000e-03
  -2.3900000e-03
  -2.3900000e-03
  -2.4700000e-03
  -2.5800000e-03
  -2.5500000e-03
  -2.4100000e-03
  -2.5500000e-03
  -2.5800000e-03
  -2.4700000e-03
  -2.4100000e-03
  -2.4400000e-03
  -2.5800000e-03
  -2.5500000e-03
  -2.3600000e-03
  -2.5500000e-03
  -2.5500000e-03
  -2.4100000e-03
  -2.3900000e-03
  -2.4100000e-03
  -2.5800000e-03
  -2.4700000e-03
  -2.3600000e-03
  -2.4700000e-03
  -2.5500000e-03
  -2.4100000e-03
  -2.4100000e-03
  -2.4400000e-03
  -2.4700000e-03
  -2.4700000e-03
  -2.3000000e-03
  -2.4100000e-03
  -2.4700000e-03
  -2.3900000e-03
  -2.3900000e-03
  -2.4700000e-03
  -2.5000000e-03
  -2.4400000e-03
  -2.3900000e-03
  -2.4400000e-03
  -2.5200000e-03
  -2.4700000e-03
  -2.4700000e-03
  -2.5000000e-03
  -2.4700000e-03
  -2.4700000e-03
  -2.4100000e-03
  -2.4100000e-03
  -2.5000000e-03
  -2.4100000e-03
  -2.3600000e-03
  -2.4100000e-03
  -2.4400000e-03
  -2.3900000e-03
  -2.3900000e-03
  -2.4400000e-03
  -2.4700000e-03
  -2.3000000e-03
  -2.3300000e-03
  -2.3900000e-03
  -2.3000000e-03
  -2.3000000e-03
  -2.3000000e-03
  -2.3600000e-03
  -2.5000000e-03
  -2.3900000e-03
  -2.3000000e-03
  -2.4400000e-03
  -2.5000000e-03
  -2.4100000e-03
  -2.4100000e-03
  -2.3900000e-03
  -2.4400000e-03
  -2.3900000e-03
  -2.2800000e-03
  -2.4400000e-03
  -2.4100000e-03
  -2.3600000e-03
  -2.3600000e-03
  -2.4400000e-03
  -2.5000000e-03
  -2.3900000e-03
  -2.3900000e-03
  -2.4700000e-03
  -2.4400000e-03
  -2.3900000e-03
  -2.3600000e-03
  -2.3600000e-03
  -2.4700000e-03
  -2.3600000e-03
  -2.3000000e-03
  -2.4100000e-03
  -2.3900000e-03
  -2.3000000e-03
  -2.3000000e-03
  -2.3900000e-03
  -2.4700000e-03
  -2.3300000e-03
  -2.2800000e-03
  -2.3600000e-03
  -2.4400000e-03
  -2.3900000e-03
  -2.3600000e-03
  -2.4100000e-03
  -2.4400000e-03
  -2.4100000e-03
  -2.3600000e-03
  -2.5000000e-03
  -2.6000000e-03
  -2.4400000e-03
  -2.3900000e-03
  -2.4700000e-03
  -2.6000000e-03
  -2.5000000e-03
  -2.3300000e-03
  -2.4700000e-03
  -2.5200000e-03
  -2.4100000e-03
  -2.4100000e-03
  -2.4700000e-03
  -2.4700000e-03
  -2.4100000e-03
  -2.3600000e-03
  -2.5000000e-03
  -2.5200000e-03
  -2.3900000e-03
  -2.4700000e-03
  -2.4700000e-03
  -2.4700000e-03
  -2.4700000e-03
  -2.3600000e-03
  -2.4400000e-03
  -2.4400000e-03
  -2.3900000e-03
  -2.3900000e-03
  -2.4700000e-03
  -2.4700000e-03
  -2.3900000e-03
  -2.3300000e-03
  -2.4700000e-03
  -2.5200000e-03
  -2.3900000e-03
  -2.3600000e-03
  -2.4700000e-03
  -2.4100000e-03
  -2.4100000e-03
  -2.3300000e-03
  -2.4100000e-03
  -2.4400000e-03
  -2.3600000e-03
  -2.3000000e-03
  -2.4100000e-03
  -2.4100000e-03
  -2.3300000e-03
  -2.3600000e-03
  -2.4400000e-03
  -2.5200000e-03
  -2.4100000e-03
  -2.3600000e-03
  -2.5000000e-03
  -2.4700000e-03
  -2.3600000e-03
  -2.3600000e-03
  -2.4400000e-03
  -2.4700000e-03
  -2.3900000e-03
  -2.3000000e-03
  -2.4400000e-03
  -2.4700000e-03
  -2.4400000e-03
  -2.4400000e-03
  -2.5000000e-03
  -2.5500000e-03
  -2.4400000e-03
  -2.3900000e-03
  -2.5200000e-03
  -2.4700000e-03
  -2.4100000e-03
  -2.3300000e-03
  -2.4400000e-03
  -2.5200000e-03
  -2.4400000e-03
  -2.3900000e-03
  -2.4700000e-03
  -2.5200000e-03
  -2.4400000e-03
  -2.4100000e-03
  -2.4700000e-03
  -2.5000000e-03
  -2.4400000e-03
  -2.3900000e-03
  -2.4700000e-03
  -2.4400000e-03
  -2.4100000e-03
  -2.4100000e-03
  -2.4700000e-03
  -2.5200000e-03
  -2.4100000e-03
  -2.4400000e-03
  -2.5500000e-03
  -2.5000000e-03
  -2.4400000e-03
  -2.4700000e-03
  -2.5000000e-03
  -2.5500000e-03
  -2.5000000e-03
  -2.4100000e-03
  -2.5200000e-03
  -2.5500000e-03
  -2.3900000e-03
  -2.3900000e-03
  -2.4700000e-03
  -2.5200000e-03
  -2.4700000e-03
  -2.3900000e-03
  -2.5200000e-03
  -2.5000000e-03
  -2.3900000e-03
  -2.3900000e-03
  -2.4100000e-03
  -2.5000000e-03
  -2.4100000e-03
  -2.2800000e-03
  -2.5200000e-03
  -2.4700000e-03
  -2.3600000e-03
  -2.4100000e-03
  -2.4700000e-03
  -2.4400000e-03
  -2.4100000e-03
  -2.3300000e-03
  -2.4100000e-03
  -2.5200000e-03
  -2.3900000e-03
  -2.4100000e-03
  -2.5200000e-03
  -2.4100000e-03
  -2.4100000e-03
  -2.3600000e-03
  -2.4700000e-03
  -2.4700000e-03
  -2.3900000e-03
  -2.4400000e-03
  -2.5000000e-03
  -2.5000000e-03
  -2.3900000e-03
  -2.4400000e-03
  -2.5200000e-03
  -2.5500000e-03
  -2.3900000e-03
  -2.3600000e-03
  -2.4400000e-03
  -2.4700000e-03
  -2.4400000e-03
  -2.3600000e-03
  -2.4700000e-03
  -2.5200000e-03
  -2.3900000e-03
  -2.3900000e-03
  -2.5200000e-03
  -2.4400000e-03
  -2.4100000e-03
  -2.4100000e-03
  -2.4100000e-03
  -2.5000000e-03
  -2.4400000e-03
  -2.4100000e-03
  -2.4100000e-03
  -2.4400000e-03
  -2.4100000e-03
  -2.3900000e-03
  -2.4700000e-03
  -2.5000000e-03
  -2.3900000e-03
  -2.4100000e-03
  -2.5200000e-03
  -2.4400000e-03
  -2.3900000e-03
  -2.5000000e-03
  -2.5200000e-03
  -2.5000000e-03
  -2.3600000e-03
  -2.4100000e-03
  -2.5500000e-03
  -2.5000000e-03
  -2.4100000e-03
  -2.4400000e-03
  -2.5000000e-03
  -2.5500000e-03
  -2.3600000e-03
  -2.3900000e-03
  -2.4700000e-03
  -2.4400000e-03
  -2.4100000e-03
  -2.4400000e-03
  -2.5000000e-03
  -2.5500000e-03
  -2.4100000e-03
  -2.3900000e-03
  -2.5200000e-03
  -2.4700000e-03
  -2.3900000e-03
  -2.3900000e-03
  -2.4400000e-03
  -2.4700000e-03
  -2.3300000e-03
  -2.3600000e-03
  -2.5500000e-03
  -2.4400000e-03
  -2.3300000e-03
  -2.4400000e-03
  -2.4400000e-03
  -2.4700000e-03
  -2.4400000e-03
  -2.4100000e-03
  -2.5200000e-03
  -2.5200000e-03
  -2.3900000e-03
  -2.4100000e-03
  -2.4700000e-03
  -2.5200000e-03
  -2.4100000e-03
  -2.3300000e-03
  -2.4700000e-03
  -2.5000000e-03
  -2.3300000e-03
  -2.4700000e-03
  -2.4700000e-03
  -2.5200000e-03
  -2.5000000e-03
  -2.4700000e-03
  -2.4700000e-03
  -2.5000000e-03
  -2.3900000e-03
  -2.4700000e-03
  -2.5500000e-03
  -2.5000000e-03
  -2.4700000e-03
  -2.4700000e-03
  -2.5500000e-03
  -2.5200000e-03
  -2.3600000e-03
  -2.3900000e-03
  -2.5200000e-03
  -2.4400000e-03
  -2.3900000e-03
  -2.3900000e-03
  -2.5000000e-03
  -2.5000000e-03
  -2.3900000e-03
  -2.4700000e-03
  -2.5000000e-03
  -2.4700000e-03
  -2.4100000e-03
  -2.3300000e-03
  -2.4700000e-03
  -2.5200000e-03
  -2.4100000e-03
  -2.4100000e-03
  -2.4700000e-03
  -2.4400000e-03
  -2.4100000e-03
  -2.3900000e-03
  -2.4700000e-03
  -2.4700000e-03
  -2.3300000e-03
  -2.3900000e-03
  -2.5200000e-03
  -2.3900000e-03
  -2.3600000e-03
  -2.4100000e-03
  -2.4700000e-03
  -2.4700000e-03
  -2.3600000e-03
  -2.4100000e-03
  -2.4700000e-03
  -2.5000000e-03
  -2.4400000e-03
  -2.5000000e-03
  -2.5200000e-03
  -2.5000000e-03
  -2.4100000e-03
  -2.4700000e-03
  -2.6000000e-03
  -2.5200000e-03
  -2.4400000e-03
  -2.5000000e-03
  -2.5800000e-03
  -2.5200000e-03
  -2.4400000e-03
  -2.4400000e-03
  -2.6000000e-03
  -2.5500000e-03
  -2.5000000e-03
  -2.5200000e-03
  -2.5800000e-03
  -2.6000000e-03
  -2.5200000e-03
  -2.5800000e-03
  -2.7100000e-03
  -2.6600000e-03
  -2.5000000e-03
  -2.5500000e-03
  -2.5800000e-03
  -2.6000000e-03
  -2.5500000e-03
  -2.5800000e-03
  -2.6900000e-03
  -2.6000000e-03
  -2.4700000e-03
  -2.5800000e-03
  -2.6000000e-03
  -2.5800000e-03
  -2.5200000e-03
  -2.4100000e-03
  -2.6000000e-03
  -2.5200000e-03
  -2.4400000e-03
  -2.5500000e-03
  -2.5800000e-03
  -2.5500000e-03
  -2.5000000e-03
  -2.4700000e-03
  -2.5800000e-03
  -2.5000000e-03
  -2.4100000e-03
  -2.5000000e-03
  -2.5000000e-03
  -2.4700000e-03
  -2.4400000e-03
  -2.4100000e-03
  -2.5000000e-03
  -2.4700000e-03
  -2.4100000e-03
  -2.3900000e-03
  -2.4700000e-03
  -2.5000000e-03
  -2.3900000e-03
  -2.4100000e-03
  -2.5200000e-03
  -2.5000000e-03
  -2.3900000e-03
  -2.5000000e-03
  -2.5200000e-03
  -2.5000000e-03
  -2.4400000e-03
  -2.4400000e-03
  -2.5200000e-03
  -2.4700000e-03
  -2.3600000e-03
  -2.5000000e-03
  -2.5200000e-03
  -2.4400000e-03
  -2.4100000e-03
  -2.5200000e-03
  -2.5200000e-03
  -2.4700000e-03
  -2.3900000e-03
  -2.4400000e-03
  -2.5000000e-03
  -2.4700000e-03
  -2.4100000e-03
  -2.4100000e-03
  -2.5200000e-03
  -2.5200000e-03
  -2.4700000e-03
  -2.5500000e-03
  -2.5800000e-03
  -2.5000000e-03
  -2.4700000e-03
  -2.4700000e-03
  -2.5000000e-03
  -2.5500000e-03
  -2.3900000e-03
  -2.4400000e-03
  -2.5500000e-03
  -2.4700000e-03
  -2.4700000e-03
  -2.4700000e-03
  -2.5800000e-03
  -2.5500000e-03
  -2.4100000e-03
  -2.5200000e-03
  -2.5800000e-03
  -2.4700000e-03
  -2.4100000e-03
  -2.4700000e-03
  -2.5200000e-03
  -2.5200000e-03
  -2.4100000e-03
  -2.4100000e-03
  -2.5000000e-03
  -2.4400000e-03
  -2.3600000e-03
  -2.5200000e-03
  -2.5800000e-03
  -2.5500000e-03
  -2.4400000e-03
  -2.4700000e-03
  -2.5200000e-03
  -2.4400000e-03
  -2.4100000e-03
  -2.5200000e-03
  -2.5500000e-03
  -2.5500000e-03
  -2.5200000e-03
  -2.5200000e-03
  -2.6000000e-03
  -2.4700000e-03
  -2.4700000e-03
  -2.5200000e-03
  -2.5200000e-03
  -2.5000000e-03
  -2.3900000e-03
  -2.4400000e-03
  -2.5000000e-03
  -2.5000000e-03
  -2.3900000e-03
  -2.5200000e-03
  -2.5000000e-03
  -2.4400000e-03
  -2.4700000e-03
  -2.4100000e-03
  -2.4700000e-03
  -2.4700000e-03
  -2.3900000e-03
  -2.3600000e-03
  -2.5000000e-03
  -2.4700000e-03
  -2.3900000e-03
  -2.4400000e-03
  -2.4400000e-03
  -2.3900000e-03
  -2.3300000e-03
  -2.4400000e-03
  -2.4700000e-03
  -2.4100000e-03
  -2.4100000e-03
  -2.3900000e-03
  -2.5000000e-03
  -2.5000000e-03
  -2.4100000e-03
  -2.3900000e-03
  -2.5200000e-03
  -2.3900000e-03
  -2.3000000e-03
  -2.4400000e-03
  -2.5000000e-03
  -2.5000000e-03
  -2.3600000e-03
  -2.4700000e-03
  -2.4700000e-03
  -2.3900000e-03
  -2.3900000e-03
  -2.3900000e-03
  -2.4400000e-03
  -2.5000000e-03
  -2.4100000e-03
  -2.3900000e-03
  -2.4100000e-03
  -2.3600000e-03
  -2.3300000e-03
  -2.3900000e-03
  -2.4400000e-03
  -2.4100000e-03
  -2.3300000e-03
  -2.4700000e-03
  -2.5500000e-03
  -2.3900000e-03
  -2.4400000e-03
  -2.4100000e-03
  -2.4700000e-03
  -2.4700000e-03
  -2.3900000e-03
  -2.5000000e-03
  -2.5500000e-03
  -2.4400000e-03
  -2.4100000e-03
  -2.4400000e-03
  -2.4100000e-03
  -2.4700000e-03
  -2.3300000e-03
  -2.4400000e-03
  -2.6000000e-03
  -2.4400000e-03
  -2.4100000e-03
  -2.5000000e-03
  -2.5500000e-03
  -2.4700000e-03
  -2.3300000e-03
  -2.4100000e-03
  -2.5000000e-03
  -2.4400000e-03
  -2.3600000e-03
  -2.4400000e-03
  -2.5000000e-03
  -2.4400000e-03
  -2.3300000e-03
  -2.3600000e-03
  -2.5500000e-03
  -2.4100000e-03
  -2.3600000e-03
  -2.4400000e-03
  -2.4100000e-03
  -2.4400000e-03
  -2.4400000e-03
  -2.4100000e-03
  -2.4700000e-03
  -2.4400000e-03
  -2.3300000e-03
  -2.4700000e-03
  -2.4100000e-03
  -2.3300000e-03
  -2.3000000e-03
  -2.3300000e-03
  -2.4400000e-03
  -2.3900000e-03
  -2.3000000e-03
  -2.4400000e-03
  -2.5200000e-03
  -2.3900000e-03
  -2.3600000e-03
  -2.4400000e-03
  -2.5000000e-03
  -2.5000000e-03
  -2.3600000e-03
  -2.4400000e-03
  -2.5000000e-03
  -2.4100000e-03
  -2.3900000e-03
  -2.4400000e-03
  -2.5000000e-03
  -2.4400000e-03
  -2.3600000e-03
  -2.4400000e-03
  -2.4700000e-03
  -2.3900000e-03
  -2.3600000e-03
  -2.4400000e-03
  -2.4700000e-03
  -2.4400000e-03
  -2.3900000e-03
  -2.4700000e-03
  -2.5000000e-03
  -2.4400000e-03
  -2.3900000e-03
  -2.4700000e-03
  -2.5000000e-03
  -2.4400000e-03
  -2.3900000e-03
  -2.4700000e-03
  -2.5000000e-03
  -2.3900000e-03
  -2.3000000e-03
  -2.4100000e-03
  -2.4700000e-03
  -2.4100000e-03
  -2.3600000e-03
  -2.4400000e-03
  -2.4100000e-03
  -2.3600000e-03
  -2.3600000e-03
  -2.4700000e-03
  -2.5000000e-03
  -2.5000000e-03
  -2.3900000e-03
  -2.4700000e-03
  -2.4700000e-03
  -2.3300000e-03
  -2.3600000e-03
  -2.4700000e-03
  -2.4700000e-03
  -2.4100000e-03
  -2.3600000e-03
  -2.4100000e-03
  -2.4700000e-03
  -2.4100000e-03
  -2.3900000e-03
  -2.4100000e-03
  -2.4100000e-03
  -2.4100000e-03
  -2.3300000e-03
  -2.3900000e-03
  -2.5200000e-03
  -2.3600000e-03
  -2.3300000e-03
  -2.4100000e-03
  -2.5000000e-03
  -2.4100000e-03
  -2.4100000e-03
  -2.4400000e-03
  -2.5000000e-03
  -2.4400000e-03
  -2.3300000e-03
  -2.5500000e-03
  -2.4700000e-03
  -2.4100000e-03
  -2.3900000e-03
  -2.4700000e-03
  -2.5200000e-03
  -2.4400000e-03
  -2.3600000e-03
  -2.5200000e-03
  -2.5500000e-03
  -2.4400000e-03
  -2.4700000e-03
  -2.4700000e-03
  -2.5200000e-03
  -2.4400000e-03
  -2.3600000e-03
  -2.4700000e-03
  -2.5200000e-03
  -2.5000000e-03
  -2.4100000e-03
  -2.4700000e-03
  -2.4700000e-03
  -2.5000000e-03
  -2.3900000e-03
  -2.5000000e-03
  -2.5500000e-03
  -2.4700000e-03
  -2.5200000e-03
  -2.5200000e-03
  -2.5200000e-03
  -2.4700000e-03
  -2.4400000e-03
  -2.5200000e-03
  -2.6300000e-03
  -2.4700000e-03
  -2.4400000e-03
  -2.5000000e-03
  -2.5800000e-03
  -2.5000000e-03
  -2.4400000e-03
  -2.5500000e-03
  -2.5200000e-03
  -2.4700000e-03
  -2.4400000e-03
  -2.5000000e-03
  -2.5800000e-03
  -2.5200000e-03
  -2.4400000e-03
  -2.4700000e-03
  -2.5800000e-03
  -2.4100000e-03
  -2.4700000e-03
  -2.5200000e-03
  -2.5800000e-03
  -2.5200000e-03
  -2.4100000e-03
  -2.5500000e-03
  -2.5200000e-03
  -2.4400000e-03
  -2.3900000e-03
  -2.4700000e-03
  -2.4700000e-03
  -2.4100000e-03
  -2.3600000e-03
  -2.5500000e-03
  -2.5500000e-03
  -2.4100000e-03
  -2.4100000e-03
  -2.5000000e-03
  -2.5500000e-03
  -2.5200000e-03
  -2.5000000e-03
  -2.5500000e-03
  -2.5500000e-03
  -2.4100000e-03
  -2.4700000e-03
  -2.6300000e-03
  -2.6000000e-03
  -2.5000000e-03
  -2.4400000e-03
  -2.5200000e-03
  -2.5800000e-03
  -2.4400000e-03
  -2.4400000e-03
  -2.5500000e-03
  -2.5200000e-03
  -2.4700000e-03
  -2.4400000e-03
  -2.4400000e-03
  -2.5200000e-03
  -2.4400000e-03
  -2.3900000e-03
  -2.4700000e-03
  -2.4400000e-03
  -2.3900000e-03
  -2.3900000e-03
  -2.3900000e-03
  -2.4700000e-03
  -2.3900000e-03
  -2.3900000e-03
  -2.4700000e-03
  -2.5000000e-03
  -2.3300000e-03
  -2.3900000e-03
  -2.4700000e-03
  -2.4700000e-03
  -2.3900000e-03
  -2.3000000e-03
  -2.4400000e-03
  -2.4700000e-03
  -2.4400000e-03
  -2.4700000e-03
  -2.4700000e-03
  -2.4700000e-03
  -2.4700000e-03
  -2.4100000e-03
  -2.5200000e-03
  -2.5500000e-03
  -2.3900000e-03
  -2.3900000e-03
  -2.4100000e-03
  -2.3900000e-03
  -2.3000000e-03
  -2.3300000e-03
  -2.4100000e-03
  -2.4100000e-03
  -2.3600000e-03
  -2.3900000e-03
  -2.4100000e-03
  -2.4700000e-03
  -2.3900000e-03
  -2.3600000e-03
  -2.4400000e-03
  -2.5000000e-03
  -2.3300000e-03
  -2.3300000e-03
  -2.4400000e-03
  -2.4100000e-03
  -2.3000000e-03
  -2.3300000e-03
  -2.4700000e-03
  -2.5200000e-03
  -2.3900000e-03
  -2.4100000e-03
  -2.5000000e-03
  -2.4400000e-03
  -2.4700000e-03
  -2.3900000e-03
  -2.4700000e-03
  -2.4700000e-03
  -2.3600000e-03
  -2.3900000e-03
  -2.4400000e-03
  -2.5000000e-03
  -2.4400000e-03
  -2.3600000e-03
  -2.4400000e-03
  -2.5000000e-03
  -2.3000000e-03
  -2.3900000e-03
  -2.4700000e-03
  -2.3900000e-03
  -2.4100000e-03
  -2.2800000e-03
  -2.4100000e-03
  -2.4400000e-03
  -2.3300000e-03
  -2.3600000e-03
  -2.4700000e-03
  -2.4400000e-03
  -2.4100000e-03
  -2.3600000e-03
  -2.4700000e-03
  -2.5500000e-03
  -2.3600000e-03
  -2.3900000e-03
  -2.5200000e-03
  -2.5000000e-03
  -2.4100000e-03
  -2.4700000e-03
  -2.4700000e-03
  -2.5200000e-03
  -2.3900000e-03
  -2.4100000e-03
  -2.5000000e-03
  -2.4100000e-03
  -2.3600000e-03
  -2.3900000e-03
  -2.5000000e-03
  -2.5200000e-03
  -2.3900000e-03
  -2.4100000e-03
  -2.5200000e-03
  -2.4400000e-03
  -2.3300000e-03
  -2.3300000e-03
  -2.4100000e-03
  -2.5000000e-03
  -2.4400000e-03
  -2.3900000e-03
  -2.5500000e-03
  -2.5000000e-03
  -2.3900000e-03
  -2.3900000e-03
  -2.4700000e-03
  -2.5200000e-03
  -2.4400000e-03
  -2.3900000e-03
  -2.5000000e-03
  -2.4400000e-03
  -2.4100000e-03
  -2.4100000e-03
  -2.4700000e-03
  -2.5000000e-03
  -2.4400000e-03
  -2.3900000e-03
  -2.5200000e-03
  -2.5500000e-03
  -2.4100000e-03
  -2.4700000e-03
  -2.5200000e-03
  -2.5000000e-03
  -2.4400000e-03
  -2.4400000e-03
  -2.5800000e-03
  -2.5800000e-03
  -2.4400000e-03
  -2.3900000e-03
  -2.5000000e-03
  -2.4700000e-03
  -2.4400000e-03
  -2.4100000e-03
  -2.5200000e-03
  -2.5200000e-03
  -2.4400000e-03
  -2.4700000e-03
  -2.4700000e-03
  -2.5200000e-03
  -2.4100000e-03
  -2.4100000e-03
  -2.5000000e-03
  -2.5000000e-03
  -2.4100000e-03
  -2.4700000e-03
  -2.5200000e-03
  -2.5500000e-03
  -2.5000000e-03
  -2.4400000e-03
  -2.5200000e-03
  -2.5500000e-03
  -2.5000000e-03
  -2.5000000e-03
  -2.5800000e-03
  -2.5500000e-03
  -2.5200000e-03
  -2.3900000e-03
  -2.5200000e-03
  -2.6000000e-03
  -2.4100000e-03
  -2.4400000e-03
  -2.5500000e-03
  -2.5500000e-03
  -2.4700000e-03
  -2.5000000e-03
  -2.5500000e-03
  -2.5500000e-03
  -2.4400000e-03
  -2.4700000e-03
  -2.5200000e-03
  -2.4700000e-03
  -2.4100000e-03
  -2.4100000e-03
  -2.4700000e-03
  -2.5500000e-03
  -2.4100000e-03
  -2.3900000e-03
  -2.6000000e-03
  -2.4700000e-03
  -2.4400000e-03
  -2.4400000e-03
  -2.5000000e-03
  -2.5500000e-03
  -2.3600000e-03
  -2.4100000e-03
  -2.5800000e-03
  -2.4700000e-03
  -2.4100000e-03
  -2.4400000e-03
  -2.5000000e-03
  -2.5800000e-03
  -2.4700000e-03
  -2.4700000e-03
  -2.5800000e-03
  -2.5800000e-03
  -2.5000000e-03
  -2.4700000e-03
  -2.5500000e-03
  -2.5000000e-03
  -2.4700000e-03
  -2.4100000e-03
  -2.5000000e-03
  -2.6000000e-03
  -2.5500000e-03
  -2.5800000e-03
  -2.6300000e-03
  -2.5500000e-03
  -2.5000000e-03
  -2.4100000e-03
  -2.4700000e-03
  -2.4100000e-03
  -2.3900000e-03
  -2.4700000e-03
