# Supplementary material for: A Novel Classification Method for Flutter Signals Based on the CNN and STFT
Source: Hindawi journal article supplement (doi:10.1155/2019/9375437), 2019-04-09
Supplement: f1 [file 9375437.f1.zip › 00_25_z18.0_25channel.txt]

  -3.2410000e-02
   8.5000000e-04
  -4.2390000e-02
  -5.4300000e-03
   6.0460000e-02
   9.3500000e-03
  -8.8000000e-04
   1.0610000e-02
  -4.3810000e-02
   4.2640000e-02
  -4.8800000e-03
  -2.6980000e-02
  -1.0010000e-02
  -9.5000000e-02
  -1.1320000e-02
   2.2180000e-02
   1.9820000e-02
   5.0090000e-02
  -2.0620000e-02
  -1.7500000e-03
   2.9830000e-02
  -4.7100000e-02
   6.1250000e-02
  -3.0460000e-02
   3.7040000e-02
   1.2260000e-02
  -2.3770000e-02
  -7.3500000e-03
  -6.7090000e-02
  -4.6450000e-02
   3.5810000e-02
   2.7940000e-02
   7.4000000e-04
   1.0310000e-02
  -4.1260000e-02
  -3.6140000e-02
   1.7630000e-02
   3.4600000e-02
   4.9000000e-02
  -3.7260000e-02
  -1.9060000e-02
  -6.7370000e-02
  -4.0090000e-02
   7.2330000e-02
   3.6330000e-02
   7.9870000e-02
   8.5820000e-02
  -3.6520000e-02
  -1.4750000e-02
  -4.3900000e-03
   8.4400000e-03
   2.2700000e-02
   6.9900000e-03
  -5.8620000e-02
  -6.6020000e-02
   2.9910000e-02
  -5.4600000e-03
   1.3160000e-02
   5.2260000e-02
  -8.0900000e-03
   2.9860000e-02
  -1.0970000e-02
   1.0890000e-02
   2.9100000e-03
   4.9100000e-03
   5.3500000e-03
  -9.8700000e-03
  -5.0610000e-02
  -5.4400000e-02
  -4.0330000e-02
  -8.3400000e-03
   2.5330000e-02
  -7.8400000e-03
   1.4310000e-02
   2.1360000e-02
   5.1240000e-02
  -2.0150000e-02
   2.3090000e-02
   4.9740000e-02
  -1.0986000e-01
   5.9940000e-02
  -7.9650000e-02
  -7.9050000e-02
   5.6540000e-02
  -1.4279000e-01
   2.7770000e-02
  -2.8730000e-02
  -8.4120000e-02
   4.9050000e-02
   3.1480000e-02
   6.6210000e-02
   2.8600000e-02
  -6.4700000e-03
  -1.8070000e-02
   7.5700000e-03
   3.8470000e-02
   3.2050000e-02
   4.6910000e-02
  -2.0600000e-03
  -5.6180000e-02
  -4.4750000e-02
   1.3110000e-02
   3.3120000e-02
   8.8810000e-02
  -2.6350000e-02
  -3.1120000e-02
   1.0090000e-02
   1.2300000e-03
  -6.3100000e-03
   7.2160000e-02
  -3.0460000e-02
   1.5410000e-02
  -2.0320000e-02
  -1.8180000e-02
   2.4430000e-02
  -3.8000000e-04
   6.0870000e-02
  -1.0310000e-02
   5.8780000e-02
   6.5800000e-03
  -6.6540000e-02
   4.1840000e-02
   9.6800000e-03
  -1.4200000e-02
  -1.0340000e-02
  -5.8510000e-02
   4.7820000e-02
  -8.2200000e-02
  -1.0720000e-02
   4.1870000e-02
  -3.5860000e-02
   7.0770000e-02
   1.9360000e-02
  -5.1190000e-02
   1.9660000e-02
   3.6470000e-02
  -5.6540000e-02
   8.1320000e-02
  -4.1100000e-03
  -4.4550000e-02
   1.6670000e-02
  -9.1910000e-02
   4.0900000e-03
   5.0970000e-02
   2.0590000e-02
   9.9300000e-03
  -3.3560000e-02
  -7.9870000e-02
   6.6100000e-03
   5.0940000e-02
   9.2900000e-03
   2.3580000e-02
  -3.0190000e-02
  -3.3230000e-02
  -1.5380000e-02
   3.2350000e-02
   4.4800000e-02
   8.3820000e-02
   1.6400000e-02
  -2.0560000e-02
  -8.4860000e-02
  -4.7570000e-02
   6.8440000e-02
  -1.0640000e-02
   5.5990000e-02
   3.0460000e-02
  -1.7140000e-02
   1.4590000e-02
   1.3220000e-02
   2.2320000e-02
   4.1890000e-02
   2.2180000e-02
  -6.1500000e-02
  -6.6190000e-02
  -4.0000000e-02
  -4.9630000e-02
  -1.9140000e-02
  -7.0500000e-03
  -5.3740000e-02
   9.9000000e-04
   1.3380000e-02
   9.2900000e-03
   8.2170000e-02
   7.4600000e-03
   1.3110000e-02
  -3.3530000e-02
  -4.9960000e-02
  -7.1600000e-03
   2.6300000e-03
  -6.9400000e-03
   5.0700000e-03
   1.0060000e-02
  -3.2190000e-02
  -6.1280000e-02
   8.2800000e-03
  -3.2130000e-02
   3.3920000e-02
   4.5760000e-02
   2.2510000e-02
   7.3840000e-02
   4.9080000e-02
  -4.3000000e-03
   2.4270000e-02
   3.0000000e-05
   1.7000000e-03
   7.0880000e-02
   3.6700000e-03
  -4.4310000e-02
  -8.3100000e-03
   4.0940000e-02
  -2.4540000e-02
   2.2890000e-02
  -8.9700000e-03
  -4.4310000e-02
   3.9070000e-02
   3.2850000e-02
  -3.6270000e-02
   6.5360000e-02
  -2.9260000e-02
  -6.6160000e-02
   3.4350000e-02
   4.0300000e-03
   5.6400000e-02
   6.8020000e-02
   1.1000000e-04
  -5.4040000e-02
  -5.5490000e-02
  -7.9920000e-02
  -2.2180000e-02
   4.1650000e-02
   1.9060000e-02
  -8.7500000e-03
  -9.0800000e-03
  -6.1330000e-02
  -4.2690000e-02
   2.5800000e-02
   9.0800000e-03
   2.0700000e-02
   4.3050000e-02
  -5.4150000e-02
  -5.1050000e-02
  -3.7560000e-02
  -1.7000000e-03
   3.4080000e-02
   6.6400000e-03
  -4.0740000e-02
   8.3900000e-03
  -2.6240000e-02
   2.4650000e-02
   1.6830000e-02
   1.8340000e-02
  -7.5100000e-03
   3.1390000e-02
  -1.6070000e-02
  -1.9850000e-02
   5.1110000e-02
   4.5800000e-03
  -2.5420000e-02
   1.8750000e-02
  -5.4890000e-02
   1.2780000e-02
   4.0600000e-03
  -1.3300000e-02
   4.8670000e-02
  -5.4800000e-03
   1.1102000e-01
   2.2240000e-02
   2.2400000e-02
   5.0720000e-02
  -4.3350000e-02
   6.8600000e-02
   2.4790000e-02
  -2.0560000e-02
  -1.3410000e-02
  -1.2500000e-02
  -5.1160000e-02
  -4.4440000e-02
  -2.5200000e-03
  -4.8280000e-02
   2.3610000e-02
   4.8940000e-02
   1.1460000e-02
   7.3920000e-02
   3.1340000e-02
   3.2680000e-02
  -1.8150000e-02
  -9.3030000e-02
  -4.1570000e-02
   2.1820000e-02
   3.1370000e-02
   7.1670000e-02
  -2.9310000e-02
  -1.0740000e-01
  -3.0540000e-02
   1.9700000e-03
   2.3580000e-02
   5.5850000e-02
   1.0990000e-02
  -4.0500000e-02
   1.3410000e-02
  -3.5780000e-02
  -7.1000000e-04
   6.1310000e-02
   1.1100000e-02
   2.1080000e-02
   3.7290000e-02
   4.3600000e-03
  -4.9850000e-02
  -5.3080000e-02
  -9.7300000e-03
  -3.4770000e-02
   3.6330000e-02
  -1.4480000e-02
  -5.1880000e-02
   8.4200000e-03
  -2.9580000e-02
   2.6980000e-02
   4.0060000e-02
   2.2920000e-02
  -3.1700000e-02
   1.8700000e-02
   4.3730000e-02
   1.4090000e-02
   1.0910000e-02
   1.3400000e-03
  -5.5190000e-02
   1.2300000e-03
  -1.7270000e-02
  -4.7870000e-02
  -5.8460000e-02
  -1.6730000e-02
  -6.6160000e-02
   3.8700000e-03
   1.1020000e-02
   3.2160000e-02
   8.0470000e-02
   5.2750000e-02
   2.9500000e-02
   2.5530000e-02
   2.6620000e-02
  -1.1380000e-02
  -1.2800000e-02
  -1.7110000e-02
  -1.9060000e-02
  -1.8260000e-02
  -1.3130000e-02
  -4.8640000e-02
  -3.9980000e-02
  -3.7120000e-02
  -2.0730000e-02
  -9.7600000e-03
   1.1210000e-02
   4.5900000e-02
   6.0540000e-02
   5.1960000e-02
   6.4820000e-02
   3.5670000e-02
   8.9470000e-02
   4.9520000e-02
  -5.4640000e-02
  -6.0160000e-02
  -1.2146000e-01
  -3.7210000e-02
   6.6850000e-02
   8.0200000e-02
   1.2750000e-02
  -4.5930000e-02
  -7.5510000e-02
   4.5650000e-02
   8.1570000e-02
   9.9770000e-02
   9.6210000e-02
  -2.0320000e-02
  -3.0000000e-04
  -8.1620000e-02
  -3.0380000e-02
   1.6810000e-02
   3.0460000e-02
   8.2040000e-02
  -5.3410000e-02
  -4.1980000e-02
  -5.3550000e-02
  -2.9470000e-02
   5.4890000e-02
   1.4720000e-02
   4.7820000e-02
   1.8400000e-02
  -3.4250000e-02
   3.3860000e-02
  -1.0257000e-01
  -1.5300000e-02
  -3.8550000e-02
  -9.7910000e-02
   7.3620000e-02
  -8.5000000e-03
  -1.0700000e-03
   1.5380000e-02
  -7.5240000e-02
   8.5000000e-04
  -1.2580000e-02
   3.0300000e-02
   5.1380000e-02
   1.0750000e-02
   2.2070000e-02
  -4.5540000e-02
   1.0800000e-02
   3.5730000e-02
  -3.8800000e-02
   3.5040000e-02
  -3.6190000e-02
  -2.8840000e-02
   2.2480000e-02
  -5.8900000e-03
   1.7470000e-02
   7.4880000e-02
   2.7500000e-02
   3.5480000e-02
  -1.1840000e-02
  -5.7060000e-02
  -3.5010000e-02
   1.2100000e-03
   3.0570000e-02
   5.7720000e-02
   7.7810000e-02
  -4.8800000e-03
   4.6340000e-02
  -1.9170000e-02
  -1.9690000e-02
   2.8600000e-02
   3.9450000e-02
   4.1210000e-02
   6.6000000e-04
  -4.4550000e-02
  -1.0970000e-02
   2.8000000e-03
   6.1880000e-02
   4.5980000e-02
   4.4500000e-02
   2.3880000e-02
   2.8840000e-02
   1.4230000e-02
  -6.3900000e-03
   7.9800000e-03
  -8.4400000e-03
  -2.2260000e-02
  -3.1090000e-02
  -7.0520000e-02
  -5.9610000e-02
  -3.5040000e-02
  -1.0500000e-02
  -3.9200000e-03
   3.0430000e-02
   4.7320000e-02
   1.3650000e-02
   3.3070000e-02
  -1.8840000e-02
  -3.4790000e-02
  -2.3440000e-02
  -8.2800000e-02
  -5.2560000e-02
  -3.1670000e-02
   8.8300000e-03
   5.5030000e-02
   1.3700000e-03
   2.6790000e-02
   2.7310000e-02
   6.0350000e-02
   3.8300000e-02
   1.4970000e-02
   4.7400000e-03
   1.9190000e-02
   1.5930000e-02
  -1.2860000e-02
  -9.9000000e-04
  -5.0530000e-02
  -1.2910000e-02
   1.9930000e-02
  -5.4860000e-02
   3.3890000e-02
  -8.0300000e-03
  -6.8440000e-02
   1.1784000e-01
  -3.2760000e-02
   8.0360000e-02
   9.0750000e-02
  -6.3610000e-02
  -2.3550000e-02
  -5.3110000e-02
   1.4500000e-03
   5.0230000e-02
   1.4010000e-02
  -1.0230000e-02
  -1.6010000e-02
  -6.9600000e-03
   4.6900000e-03
   2.9900000e-03
  -1.7740000e-02
  -3.6250000e-02
   5.1800000e-03
   7.5900000e-03
  -1.5240000e-02
   8.1100000e-02
   6.8220000e-02
   1.3460000e-02
   5.1110000e-02
  -2.0890000e-02
  -6.1960000e-02
   4.0660000e-02
  -4.1920000e-02
   8.4200000e-03
  -1.2610000e-02
  -6.5170000e-02
   5.2180000e-02
   3.2380000e-02
   8.1540000e-02
   5.2920000e-02
  -6.9400000e-03
  -8.8800000e-03
  -5.4150000e-02
  -2.4920000e-02
  -1.1870000e-02
   5.4300000e-03
  -1.6180000e-02
   2.2180000e-02
   2.2480000e-02
  -1.2670000e-02
  -1.9250000e-02
  -4.9930000e-02
  -1.1020000e-02
  -4.9600000e-03
   6.0180000e-02
   5.8480000e-02
  -8.5300000e-03
   6.9400000e-03
  -1.2914000e-01
  -1.5850000e-02
   7.0140000e-02
  -3.4410000e-02
   2.8380000e-02
  -8.5760000e-02
  -5.9520000e-02
   7.2660000e-02
   2.1300000e-02
   6.7830000e-02
   5.2010000e-02
  -2.7560000e-02
  -2.9300000e-03
  -4.9270000e-02
   2.7420000e-02
  -7.1800000e-03
  -4.5000000e-03
  -2.7010000e-02
   5.0260000e-02
  -4.5430000e-02
   3.4220000e-02
  -3.1830000e-02
  -1.0016000e-01
   7.9680000e-02
  -1.7680000e-02
  -3.5400000e-03
   7.9000000e-03
  -6.1660000e-02
   1.6560000e-02
   8.7110000e-02
   5.6230000e-02
   3.0740000e-02
   2.7610000e-02
  -5.7300000e-03
  -4.1180000e-02
   4.8910000e-02
  -5.8460000e-02
   5.5490000e-02
   4.8640000e-02
  -2.2760000e-02
   2.6270000e-02
  -7.2440000e-02
  -2.2320000e-02
   2.4270000e-02
  -3.6360000e-02
   1.3380000e-02
   2.4870000e-02
   2.3060000e-02
   6.7390000e-02
   3.7670000e-02
   6.5800000e-02
  -2.4400000e-03
  -1.8780000e-02
  -1.2900000e-03
  -3.1810000e-02
   4.6750000e-02
   4.4610000e-02
  -9.3330000e-02
   7.3200000e-03
  -1.5266000e-01
  -1.8480000e-02
   3.3890000e-02
  -1.6640000e-02
   6.4600000e-02
  -3.1890000e-02
  -3.1150000e-02
   6.4200000e-03
  -1.4500000e-03
   6.9640000e-02
   3.1260000e-02
  -2.8800000e-03
   1.5710000e-02
  -3.4960000e-02
  -1.4420000e-02
  -3.2100000e-03
  -3.4600000e-02
  -3.6330000e-02
  -2.3990000e-02
   4.2910000e-02
   1.1190000e-02
   4.6280000e-02
   3.9260000e-02
  -6.2400000e-02
   4.7400000e-03
  -9.9800000e-03
  -9.5100000e-03
   8.0250000e-02
  -4.2660000e-02
   1.0860000e-02
  -3.5120000e-02
  -3.6140000e-02
   6.5830000e-02
  -2.2670000e-02
  -1.1520000e-02
   5.1800000e-03
  -3.4680000e-02
   3.8080000e-02
  -9.0200000e-03
   4.8610000e-02
   1.8450000e-02
  -1.0420000e-02
   1.1130000e-02
  -9.9010000e-02
   4.4250000e-02
  -7.9800000e-03
  -3.5400000e-02
   8.1020000e-02
   8.6900000e-03
  -1.1020000e-02
  -2.9830000e-02
  -8.1240000e-02
  -1.7030000e-02
   5.3740000e-02
   4.3510000e-02
   0.0000000e+00
   4.0600000e-03
  -7.1040000e-02
  -8.5300000e-03
   3.2760000e-02
  -1.7900000e-02
   8.4120000e-02
   1.1430000e-02
   3.5420000e-02
   2.2430000e-02
  -1.3650000e-02
  -1.2720000e-02
   4.2090000e-02
   6.1200000e-02
   5.6450000e-02
   1.8750000e-02
   2.6320000e-02
  -6.7590000e-02
  -6.7230000e-02
  -6.9640000e-02
  -6.0180000e-02
   1.4230000e-02
   3.4500000e-03
   1.0560000e-02
   3.8800000e-02
   2.9260000e-02
   6.3990000e-02
  -9.0000000e-04
   1.2970000e-02
   4.3160000e-02
  -4.2850000e-02
   4.8670000e-02
   2.3850000e-02
  -7.6960000e-02
   4.0900000e-03
  -7.6280000e-02
  -5.0420000e-02
   1.6290000e-02
  -3.8280000e-02
   4.4100000e-03
  -1.0560000e-02
  -1.0470000e-02
  -8.8800000e-03
   3.1010000e-02
   7.0700000e-03
   1.8010000e-02
   7.6220000e-02
  -5.9500000e-02
   1.3160000e-02
   4.6310000e-02
  -6.6930000e-02
   1.9960000e-02
  -5.1710000e-02
  -6.6930000e-02
  -5.3080000e-02
   1.2090000e-02
  -5.7000000e-03
  -1.4200000e-02
   8.2670000e-02
  -4.9330000e-02
   3.2000000e-02
   6.6160000e-02
  -9.5310000e-02
   1.1269000e-01
  -9.9800000e-03
   1.8900000e-03
   5.5690000e-02
  -8.7600000e-02
  -1.6620000e-02
  -4.7190000e-02
  -3.4410000e-02
   4.6830000e-02
   8.2200000e-02
   1.5080000e-02
   1.4670000e-02
   4.6340000e-02
  -8.8510000e-02
   4.2690000e-02
   4.7000000e-04
   1.9000000e-04
   4.0410000e-02
  -1.8860000e-02
   4.0300000e-03
   6.5800000e-02
   6.6980000e-02
   5.5380000e-02
   2.5360000e-02
  -4.1240000e-02
  -6.2270000e-02
   2.2620000e-02
  -5.2370000e-02
   2.8930000e-02
  -1.2300000e-03
  -4.0470000e-02
   1.6420000e-02
  -1.6010000e-02
   3.2550000e-02
   5.5520000e-02
  -7.2900000e-03
   4.9460000e-02
   4.8560000e-02
   2.6070000e-02
   1.2340000e-02
  -3.7750000e-02
  -7.6850000e-02
  -7.4500000e-02
  -4.1890000e-02
  -4.0220000e-02
  -2.1470000e-02
  -2.0430000e-02
  -1.9520000e-02
   4.1350000e-02
   1.5490000e-02
   7.6110000e-02
   8.6890000e-02
   2.0920000e-02
   7.4500000e-02
  -2.0290000e-02
  -5.3140000e-02
   1.1630000e-02
  -6.8660000e-02
  -4.1650000e-02
   2.2020000e-02
  -5.0450000e-02
  -8.8800000e-03
  -4.4580000e-02
  -9.7170000e-02
  -3.7540000e-02
  -2.0540000e-02
   3.1390000e-02
   4.7460000e-02
   3.2220000e-02
   6.0180000e-02
   4.4530000e-02
   6.9200000e-02
  -1.3350000e-02
   2.1900000e-03
  -6.5800000e-03
  -9.5250000e-02
  -1.8320000e-02
  -2.7610000e-02
  -3.6380000e-02
   4.4390000e-02
  -4.2250000e-02
  -1.6510000e-02
  -1.3160000e-02
  -2.8380000e-02
   5.9060000e-02
   4.1890000e-02
   6.3200000e-02
  -1.8510000e-02
  -3.0020000e-02
   3.5290000e-02
   1.8750000e-02
   1.0068000e-01
   2.3200000e-02
   9.9800000e-03
   2.6300000e-03
  -7.8830000e-02
  -3.3530000e-02
  -8.9400000e-03
   3.2410000e-02
   3.8140000e-02
   3.5840000e-02
  -8.4860000e-02
  -3.3200000e-02
   8.9110000e-02
   4.5540000e-02
   6.2810000e-02
  -9.2900000e-03
  -2.2460000e-02
   3.9590000e-02
   5.9220000e-02
   4.4720000e-02
  -2.7580000e-02
  -4.2800000e-02
  -2.0290000e-02
  -6.6000000e-04
   9.4900000e-03
   6.8500000e-03
  -3.1280000e-02
  -1.6590000e-02
   3.2930000e-02
  -3.5040000e-02
   1.7990000e-02
  -2.8510000e-02
  -4.0720000e-02
  -2.9640000e-02
  -3.8000000e-04
   5.7360000e-02
   9.8200000e-03
   5.8260000e-02
   8.0100000e-03
  -4.9400000e-03
   2.6210000e-02
  -5.8870000e-02
   2.4350000e-02
   4.3900000e-03
  -9.1300000e-03
  -7.7900000e-03
  -1.0797000e-01
  -1.0880000e-01
  -2.4460000e-02
   1.7330000e-02
  -3.3500000e-02
   3.8030000e-02
   2.7940000e-02
  -1.0627000e-01
   5.4070000e-02
  -3.0540000e-02
   2.8570000e-02
   1.2220000e-01
   8.8300000e-03
  -3.0980000e-02
   6.9600000e-03
  -5.1350000e-02
  -2.7310000e-02
   1.5660000e-02
  -1.0010000e-02
  -3.7810000e-02
  -2.9720000e-02
  -7.6500000e-03
  -4.4030000e-02
  -8.5500000e-03
  -8.9140000e-02
  -6.0350000e-02
   4.8200000e-02
   7.8910000e-02
   1.1845000e-01
   1.1228000e-01
   6.7170000e-02
   7.0110000e-02
   3.7400000e-02
   8.0140000e-02
  -6.8740000e-02
  -4.1730000e-02
  -1.0093000e-01
  -1.0646000e-01
   2.8980000e-02
  -2.9940000e-02
  -5.4260000e-02
   5.6500000e-03
  -5.0780000e-02
   7.5370000e-02
   7.4770000e-02
   6.7480000e-02
   8.7000000e-02
   1.7050000e-02
   8.2230000e-02
   9.3500000e-03
   6.3770000e-02
   4.1870000e-02
  -2.3910000e-02
  -5.0920000e-02
  -8.4200000e-02
  -4.1040000e-02
  -6.0020000e-02
  -5.8510000e-02
  -3.4710000e-02
  -6.7500000e-02
  -3.4900000e-02
   2.6000000e-03
   2.8240000e-02
   5.6260000e-02
   7.1370000e-02
  -2.0650000e-02
   2.2980000e-02
   1.0317000e-01
   0.0000000e+00
   7.2740000e-02
   1.5100000e-03
  -4.5020000e-02
  -3.3610000e-02
  -1.1233000e-01
  -6.5780000e-02
  -6.6350000e-02
  -5.2120000e-02
   2.4920000e-02
   3.9500000e-03
   3.7560000e-02
   5.5030000e-02
  -2.4700000e-02
  -6.4100000e-02
   4.6610000e-02
  -3.6770000e-02
   5.9690000e-02
   6.0160000e-02
  -9.6000000e-03
   2.3690000e-02
  -6.2130000e-02
  -4.4140000e-02
  -3.7370000e-02
  -1.0720000e-02
  -1.7820000e-02
  -1.8180000e-02
   3.5450000e-02
  -7.7540000e-02
   5.6200000e-03
  -4.6300000e-03
   1.0780000e-02
   1.4299000e-01
   9.4900000e-03
   5.0310000e-02
   7.4280000e-02
  -6.7010000e-02
   2.6050000e-02
  -5.6200000e-03
  -2.4240000e-02
   7.7460000e-02
  -5.4590000e-02
  -4.4060000e-02
  -5.1800000e-03
  -1.1184000e-01
   4.4090000e-02
  -5.9360000e-02
  -6.0000000e-04
   2.2070000e-02
  -3.6190000e-02
   1.1346000e-01
   5.5270000e-02
   2.9310000e-02
   6.7230000e-02
  -2.4070000e-02
   4.3680000e-02
  -1.7930000e-02
  -1.2530000e-02
  -5.2970000e-02
  -7.5100000e-03
  -3.1370000e-02
  -5.3740000e-02
   9.6000000e-04
  -6.5780000e-02
  -2.5030000e-02
   3.2130000e-02
  -3.1800000e-03
   9.1740000e-02
   3.8410000e-02
   7.1100000e-02
   4.3270000e-02
   7.5100000e-03
   5.5550000e-02
   1.4120000e-02
  -1.7050000e-02
  -1.6940000e-02
  -9.5720000e-02
  -5.7740000e-02
  -2.3500000e-02
  -6.9810000e-02
  -3.7670000e-02
  -2.9060000e-02
  -3.1940000e-02
   3.9290000e-02
   5.2040000e-02
   5.1350000e-02
   8.5980000e-02
   2.0670000e-02
  -1.3020000e-02
   9.2100000e-03
  -3.3530000e-02
  -2.3520000e-02
  -3.2400000e-03
  -9.0480000e-02
  -4.8970000e-02
  -5.4370000e-02
  -4.8500000e-02
   1.1800000e-03
  -2.7640000e-02
  -2.5200000e-03
  -1.3200000e-03
   5.4320000e-02
   9.3060000e-02
   4.4360000e-02
   4.5790000e-02
  -4.8640000e-02
   1.0700000e-03
   3.8030000e-02
   2.9450000e-02
  -6.1100000e-03
  -8.5000000e-03
  -9.1630000e-02
  -2.3000000e-02
  -2.5500000e-02
  -9.5700000e-03
   7.9000000e-03
  -5.1790000e-02
   3.1780000e-02
   5.2310000e-02
   3.3830000e-02
   5.7960000e-02
   3.5730000e-02
   3.8220000e-02
  -2.8570000e-02
   3.3500000e-02
  -3.0820000e-02
  -3.5150000e-02
   4.7650000e-02
  -8.8750000e-02
  -3.5150000e-02
  -3.4740000e-02
  -7.9380000e-02
   4.2830000e-02
  -1.6640000e-02
   5.9390000e-02
   8.4390000e-02
   6.7700000e-02
   2.8680000e-02
  -4.6360000e-02
  -3.8850000e-02
  -3.2020000e-02
   4.5430000e-02
   3.4960000e-02
   1.8950000e-02
   2.1360000e-02
  -4.4970000e-02
  -3.9150000e-02
  -1.7660000e-02
  -2.5500000e-03
   4.8750000e-02
   1.0140000e-02
  -8.3680000e-02
  -2.1410000e-02
  -4.1260000e-02
   9.3500000e-03
   6.7120000e-02
  -1.6700000e-02
   2.1100000e-03
  -2.2890000e-02
   1.0940000e-02
   1.8640000e-02
   3.2900000e-02
   1.9110000e-02
  -5.1550000e-02
   2.8620000e-02
  -8.2890000e-02
   1.4180000e-02
   4.7950000e-02
  -5.7800000e-02
  -6.1100000e-03
  -6.7810000e-02
  -7.8390000e-02
   7.9950000e-02
  -4.0300000e-03
  -1.1320000e-02
   8.5080000e-02
   2.3960000e-02
   6.6300000e-02
   5.9610000e-02
  -6.5300000e-03
  -2.8730000e-02
  -1.7930000e-02
  -1.2260000e-02
  -2.0430000e-02
  -1.6860000e-02
  -2.4480000e-02
  -3.0900000e-02
  -4.8480000e-02
  -5.1790000e-02
   1.7300000e-02
   1.8530000e-02
   1.0877000e-01
   9.4840000e-02
   2.0800000e-03
   2.9260000e-02
  -7.0500000e-03
  -5.9880000e-02
   5.2780000e-02
   1.4260000e-02
  -3.1120000e-02
  -4.4530000e-02
  -1.0745000e-01
  -8.6860000e-02
   2.8050000e-02
   2.8190000e-02
   2.8980000e-02
   3.9840000e-02
   2.2040000e-02
   1.8950000e-02
   7.7290000e-02
  -3.7840000e-02
   2.4510000e-02
   1.0545000e-01
  -2.6650000e-02
   3.8170000e-02
   1.3050000e-02
  -8.5050000e-02
   5.5300000e-02
  -7.0080000e-02
  -8.0600000e-03
  -3.1480000e-02
  -6.3310000e-02
  -4.2060000e-02
  -1.1650000e-02
   4.8890000e-02
   1.0200000e-02
   2.5500000e-02
  -2.2260000e-02
  -4.3430000e-02
   4.5190000e-02
   3.3480000e-02
   6.5450000e-02
   1.9250000e-02
  -5.8100000e-03
  -3.8800000e-02
  -2.0070000e-02
  -2.8350000e-02
  -7.5560000e-02
  -3.6470000e-02
  -4.8480000e-02
  -3.0650000e-02
  -6.6000000e-04
  -2.9470000e-02
  -2.0590000e-02
   1.2530000e-02
  -3.4300000e-03
   6.8600000e-02
   5.3080000e-02
   1.9930000e-02
   6.8330000e-02
  -2.8380000e-02
   1.5960000e-02
  -2.4400000e-03
  -3.4410000e-02
   3.1780000e-02
  -1.0967000e-01
  -1.6400000e-02
  -9.0640000e-02
  -7.5980000e-02
   6.3660000e-02
  -4.4640000e-02
   7.0790000e-02
   4.3810000e-02
   2.6680000e-02
   1.0156000e-01
   4.7190000e-02
   4.3240000e-02
   2.2870000e-02
  -5.2530000e-02
   1.3000000e-02
  -1.0250000e-02
  -2.8160000e-02
  -3.4000000e-03
  -6.8870000e-02
  -7.4500000e-02
  -4.4000000e-04
  -1.7880000e-02
  -2.2500000e-03
   8.0600000e-03
  -3.2350000e-02
   1.0280000e-02
   6.9590000e-02
   6.9340000e-02
   1.0688000e-01
   6.1250000e-02
   1.6200000e-02
  -4.7650000e-02
  -4.6640000e-02
  -1.0280000e-02
   1.7440000e-02
  -3.4000000e-02
  -6.5000000e-03
  -7.9590000e-02
  -7.6660000e-02
  -7.3540000e-02
  -8.1980000e-02
   2.5640000e-02
   6.2240000e-02
   4.6470000e-02
   8.6530000e-02
  -2.0760000e-02
   2.5640000e-02
   4.3430000e-02
   4.0190000e-02
   7.8060000e-02
   3.8520000e-02
   7.4000000e-04
  -7.4550000e-02
  -6.2980000e-02
  -1.0049000e-01
  -6.6050000e-02
  -1.7140000e-02
  -4.9110000e-02
   2.3170000e-02
   8.7500000e-03
  -1.8560000e-02
   3.7510000e-02
  -4.3600000e-03
   3.6700000e-03
   7.4300000e-02
   5.1080000e-02
   3.9980000e-02
   9.0950000e-02
   1.9410000e-02
  -6.0210000e-02
   2.0230000e-02
  -7.3560000e-02
  -4.1810000e-02
  -4.8910000e-02
  -8.3520000e-02
  -5.4120000e-02
  -3.3370000e-02
   3.8390000e-02
   3.4300000e-03
   1.5490000e-02
   1.9820000e-02
   1.8860000e-02
   9.3030000e-02
   3.0430000e-02
   4.8060000e-02
  -2.1060000e-02
  -2.9890000e-02
   4.1510000e-02
  -3.2550000e-02
  -1.1240000e-02
  -3.8400000e-03
  -3.9620000e-02
  -4.0060000e-02
  -2.6240000e-02
  -5.1460000e-02
  -1.8480000e-02
   2.6540000e-02
  -7.9500000e-03
   1.2120000e-02
   2.1930000e-02
   2.5280000e-02
   5.9140000e-02
   5.7720000e-02
   4.4470000e-02
   1.8640000e-02
   1.6370000e-02
  -4.2720000e-02
  -4.4910000e-02
   6.6000000e-02
   2.3250000e-02
   1.5130000e-02
  -7.6330000e-02
  -1.2048000e-01
  -2.2920000e-02
  -2.4510000e-02
   9.7970000e-02
   4.4690000e-02
  -1.5030000e-02
   7.1070000e-02
  -4.0600000e-03
   8.2470000e-02
   4.8530000e-02
   3.8580000e-02
  -3.3940000e-02
  -4.8910000e-02
  -2.5800000e-02
  -5.9390000e-02
   7.2100000e-03
  -6.5170000e-02
  -6.4410000e-02
  -1.8510000e-02
  -9.5690000e-02
   4.7300000e-02
   3.5200000e-02
   4.3050000e-02
   6.5010000e-02
  -1.1840000e-02
  -1.2900000e-03
  -5.8700000e-03
   2.7100000e-03
   5.0400000e-03
   2.1390000e-02
  -7.2470000e-02
  -2.9150000e-02
  -3.0270000e-02
  -2.6400000e-02
   6.9260000e-02
  -7.8800000e-02
  -2.9830000e-02
   3.0400000e-03
  -4.2690000e-02
   7.7920000e-02
   1.6810000e-02
  -4.3300000e-03
   2.5280000e-02
   4.9110000e-02
   2.8820000e-02
  -3.9150000e-02
   3.0000000e-04
  -4.4310000e-02
   8.6600000e-03
   8.3980000e-02
  -2.6650000e-02
   2.6160000e-02
  -2.9060000e-02
  -1.8560000e-02
   2.1140000e-02
  -2.7560000e-02
   8.0610000e-02
  -7.8990000e-02
  -2.0800000e-03
   8.2800000e-03
  -2.5120000e-02
   5.4320000e-02
   3.3700000e-03
  -3.2380000e-02
   5.2940000e-02
   4.8940000e-02
   1.9910000e-02
   6.3940000e-02
  -5.6780000e-02
  -5.1440000e-02
   1.5770000e-02
   9.8700000e-03
   6.4980000e-02
   6.7940000e-02
  -9.7470000e-02
  -6.2050000e-02
  -9.1930000e-02
   1.5400000e-03
   7.5560000e-02
   7.2580000e-02
   5.0500000e-02
   3.5150000e-02
   2.0620000e-02
   1.7520000e-02
   2.4430000e-02
   4.1150000e-02
  -2.1360000e-02
   1.6010000e-02
  -3.2850000e-02
  -7.3500000e-03
   9.1900000e-03
  -8.8590000e-02
   2.9390000e-02
  -8.0300000e-03
   2.2920000e-02
   9.5000000e-02
   2.9670000e-02
  -5.5900000e-03
  -9.2900000e-03
  -2.5360000e-02
   3.0540000e-02
   5.7500000e-02
   3.8000000e-02
  -3.5730000e-02
  -1.6510000e-02
  -6.6900000e-03
  -3.4990000e-02
   4.0500000e-02
   3.9730000e-02
   3.8220000e-02
   1.2600000e-03
   1.6310000e-02
  -2.0590000e-02
   3.0400000e-03
   3.9040000e-02
   1.3600000e-02
  -5.3140000e-02
  -1.1680000e-02
   5.4860000e-02
  -1.5900000e-02
   2.9940000e-02
   1.5880000e-02
  -3.2550000e-02
   8.8810000e-02
   1.3080000e-02
  -9.7100000e-03
  -5.9800000e-03
  -4.1460000e-02
  -1.3630000e-02
   8.2780000e-02
   5.9500000e-03
   1.6370000e-02
  -6.6600000e-03
  -8.9300000e-02
  -6.0000000e-03
   2.5090000e-02
   2.0540000e-02
   7.0350000e-02
   2.4400000e-03
   1.7190000e-02
   3.5810000e-02
   2.7660000e-02
  -7.1600000e-03
   1.2910000e-02
   2.8540000e-02
  -4.2850000e-02
   2.7120000e-02
   2.1900000e-03
   3.9350000e-02
  -6.3600000e-03
  -1.4610000e-02
   5.3850000e-02
   1.5380000e-02
   2.5880000e-02
   5.6480000e-02
  -4.0170000e-02
  -7.1300000e-03
   5.1080000e-02
  -3.9370000e-02
   5.4700000e-02
   2.3910000e-02
  -5.4590000e-02
   9.1660000e-02
  -2.9450000e-02
   2.1080000e-02
   6.4680000e-02
  -3.2020000e-02
   1.7250000e-02
  -1.3700000e-03
  -1.5630000e-02
  -2.3830000e-02
   1.8700000e-02
  -2.9970000e-02
   2.8790000e-02
   6.3500000e-02
  -2.6620000e-02
   3.6580000e-02
  -2.9010000e-02
  -9.9140000e-02
   4.6720000e-02
   2.3000000e-03
   7.6030000e-02
   1.9710000e-02
  -3.7730000e-02
  -2.1280000e-02
  -2.4540000e-02
   1.8730000e-02
   4.5600000e-02
   5.2830000e-02
   2.1100000e-03
  -5.6200000e-03
   2.5800000e-03
  -2.8600000e-02
   8.0000000e-04
   1.6620000e-02
  -3.9180000e-02
  -2.9200000e-02
  -1.3960000e-02
  -4.3320000e-02
   3.8300000e-02
   9.5580000e-02
   1.7270000e-02
   6.5200000e-02
   1.2940000e-02
   2.9360000e-02
   3.2050000e-02
  -1.2170000e-02
   1.2280000e-02
  -2.1690000e-02
  -4.7080000e-02
   1.4040000e-02
  -3.6490000e-02
   3.0430000e-02
   5.2450000e-02
  -2.4510000e-02
   3.5560000e-02
  -2.1110000e-02
  -2.6000000e-03
   2.5770000e-02
   1.0312000e-01
   5.3900000e-02
   4.2090000e-02
   4.2740000e-02
  -5.2560000e-02
   4.6280000e-02
   1.2610000e-02
   1.8640000e-02
   8.3680000e-02
  -8.7790000e-02
  -2.5440000e-02
  -3.1120000e-02
  -4.4250000e-02
   4.0090000e-02
  -1.0010000e-02
  -3.5510000e-02
   3.8900000e-03
  -5.0860000e-02
   9.4300000e-03
   4.7270000e-02
   1.5770000e-02
   5.4290000e-02
   1.6640000e-02
   2.4270000e-02
   4.8300000e-03
   1.8290000e-02
  -1.5520000e-02
  -7.6500000e-03
   3.9260000e-02
  -2.3830000e-02
   2.3500000e-02
  -7.6800000e-03
  -7.5620000e-02
  -3.8440000e-02
  -1.3490000e-02
  -3.4190000e-02
  -1.0670000e-02
   4.7240000e-02
   6.6600000e-03
   7.5350000e-02
   1.0340000e-02
   7.0200000e-03
   3.4190000e-02
   5.0340000e-02
   4.1700000e-03
   2.5060000e-02
   2.7580000e-02
  -1.4640000e-02
  -4.6530000e-02
  -7.2800000e-02
  -4.5730000e-02
   4.0990000e-02
   5.5270000e-02
   9.2100000e-03
  -3.7800000e-03
  -5.5490000e-02
  -5.8000000e-04
   3.2930000e-02
   2.1220000e-02
   6.4160000e-02
   4.8280000e-02
   3.8660000e-02
  -1.1080000e-02
  -6.2500000e-03
  -2.7690000e-02
  -1.2090000e-02
   1.5960000e-02
  -1.9410000e-02
   3.3500000e-03
   8.0000000e-04
  -2.3500000e-02
  -5.3080000e-02
  -1.7490000e-02
   1.4150000e-02
   1.6670000e-02
  -1.3700000e-03
  -1.4780000e-02
   3.7620000e-02
   3.9870000e-02
   2.2290000e-02
   5.2920000e-02
  -2.8300000e-02
   3.9450000e-02
  -7.4300000e-03
  -1.8900000e-03
  -2.0620000e-02
  -2.9170000e-02
  -3.6140000e-02
  -1.2800000e-02
  -2.4400000e-03
   3.3700000e-02
  -1.3270000e-02
  -8.0000000e-04
  -1.5380000e-02
   4.9710000e-02
   3.5230000e-02
  -8.5000000e-04
   2.5010000e-02
   3.1000000e-03
   1.3490000e-02
   4.9100000e-03
  -5.1350000e-02
  -2.5530000e-02
  -4.7320000e-02
   3.1560000e-02
   6.5800000e-03
  -2.2870000e-02
   1.0400000e-03
  -5.1330000e-02
   5.2940000e-02
   2.3550000e-02
   4.6690000e-02
   6.3200000e-02
   2.7010000e-02
   5.1550000e-02
   1.0420000e-02
  -3.7510000e-02
  -1.6010000e-02
  -5.9520000e-02
   2.9300000e-03
  -7.1800000e-03
  -8.9100000e-03
   1.4090000e-02
  -1.7440000e-02
  -4.2500000e-02
  -2.7120000e-02
   4.6040000e-02
   3.4080000e-02
   8.3080000e-02
   3.8520000e-02
  -5.6760000e-02
  -4.7680000e-02
  -4.0440000e-02
  -2.8080000e-02
   4.7630000e-02
   4.4660000e-02
  -1.2370000e-02
   3.1010000e-02
  -3.3500000e-03
  -3.4000000e-02
   3.4930000e-02
  -1.6070000e-02
  -2.7610000e-02
   6.3600000e-03
  -1.6340000e-02
  -5.3680000e-02
  -1.6260000e-02
  -3.8690000e-02
  -8.1700000e-03
   1.0712000e-01
   1.8230000e-02
   1.1800000e-03
   2.5470000e-02
  -6.6000000e-02
   2.0870000e-02
   7.7810000e-02
   2.1800000e-02
   4.5080000e-02
  -1.6200000e-03
  -8.7550000e-02
  -7.3430000e-02
   4.9600000e-03
  -4.9850000e-02
   8.9400000e-03
  -1.9580000e-02
  -3.7180000e-02
   2.0230000e-02
   3.2110000e-02
   6.1720000e-02
   6.0510000e-02
   2.5170000e-02
   8.5000000e-03
  -1.0700000e-03
  -2.2150000e-02
   4.9900000e-03
  -6.9700000e-02
  -2.6380000e-02
  -4.4830000e-02
  -4.7950000e-02
  -4.0720000e-02
  -4.2170000e-02
  -7.9800000e-03
  -8.6400000e-03
  -4.9930000e-02
   4.9710000e-02
   1.0390000e-02
   5.2700000e-02
   1.7550000e-02
  -1.5680000e-02
   4.7320000e-02
  -7.5590000e-02
  -2.8820000e-02
  -4.4420000e-02
  -9.7880000e-02
   5.2620000e-02
  -4.8170000e-02
  -2.6540000e-02
   8.6900000e-03
  -2.6270000e-02
   6.0000000e-03
   1.2420000e-02
   1.9910000e-02
  -3.2490000e-02
  -3.3040000e-02
   2.0180000e-02
  -3.5590000e-02
   6.7010000e-02
   2.9260000e-02
  -7.2660000e-02
   4.3300000e-03
  -8.6530000e-02
  -3.8000000e-02
   4.3180000e-02
  -1.5190000e-02
   9.5400000e-03
  -2.6050000e-02
  -3.1000000e-03
   5.6400000e-02
   6.9400000e-02
   1.3020000e-02
  -2.6900000e-03
  -3.2790000e-02
  -3.3480000e-02
   3.8360000e-02
  -8.6900000e-03
  -5.5770000e-02
   3.0320000e-02
  -1.9770000e-02
  -1.1870000e-02
   2.4320000e-02
  -1.0644000e-01
   1.5900000e-03
   2.6070000e-02
  -3.6490000e-02
   1.6480000e-02
  -3.8700000e-03
  -8.9400000e-03
   7.3920000e-02
  -8.2010000e-02
  -1.3300000e-02
  -2.4050000e-02
  -4.8090000e-02
   1.2010000e-02
  -3.0000000e-04
   6.0300000e-03
   1.0720000e-02
   3.4410000e-02
   2.7170000e-02
  -4.8370000e-02
  -2.1140000e-02
  -6.0650000e-02
  -2.1170000e-02
   6.3990000e-02
   3.0650000e-02
  -1.3330000e-02
  -1.7140000e-02
  -3.5260000e-02
  -1.1050000e-02
   8.2470000e-02
  -1.9110000e-02
  -4.9600000e-03
  -3.3860000e-02
  -7.0270000e-02
   3.8300000e-02
   5.0920000e-02
   4.9400000e-03
   3.1970000e-02
   1.1080000e-02
  -1.7550000e-02
   4.9520000e-02
  -9.5310000e-02
  -5.6950000e-02
  -8.0690000e-02
  -3.7450000e-02
  -1.6480000e-02
   3.0520000e-02
   5.1190000e-02
  -2.7280000e-02
   9.1000000e-03
  -1.3000000e-02
   2.9450000e-02
   9.6680000e-02
   6.1610000e-02
   5.0000000e-05
  -3.7290000e-02
  -5.9630000e-02
  -2.5360000e-02
   3.0490000e-02
  -4.1150000e-02
   4.3180000e-02
  -6.0290000e-02
  -3.5920000e-02
  -3.6300000e-02
  -1.5776000e-01
  -1.1300000e-02
  -4.7930000e-02
   5.3500000e-03
   1.1546000e-01
  -3.4630000e-02
   2.2700000e-02
   1.6090000e-02
  -5.9940000e-02
   1.0282000e-01
   1.7140000e-02
   1.2010000e-02
  -3.2900000e-02
  -3.7950000e-02
  -8.7270000e-02
  -7.7210000e-02
  -4.3810000e-02
  -6.7970000e-02
   6.2650000e-02
   3.5150000e-02
  -1.1570000e-02
   5.9090000e-02
  -1.6480000e-02
   4.1870000e-02
  -1.5100000e-03
   6.3690000e-02
   3.2160000e-02
   4.5820000e-02
   1.6400000e-02
  -6.2380000e-02
  -2.3900000e-03
  -4.3730000e-02
  -3.9260000e-02
   2.7310000e-02
  -5.7990000e-02
   4.8610000e-02
  -8.1700000e-03
   4.0900000e-03
  -9.1300000e-03
  -1.1490000e-02
   8.6600000e-03
  -7.9200000e-03
   6.2500000e-03
   3.9320000e-02
   4.8640000e-02
   9.9000000e-04
   2.2150000e-02
  -1.7440000e-02
  -1.7410000e-02
  -2.0650000e-02
  -4.2830000e-02
  -6.6900000e-02
  -7.2330000e-02
   1.2150000e-02
   6.9400000e-03
   5.1300000e-02
   2.1220000e-02
   1.9170000e-02
  -5.2810000e-02
   7.4110000e-02
   4.4700000e-03
   5.2070000e-02
   4.9380000e-02
  -2.6270000e-02
  -2.2760000e-02
   7.7900000e-03
  -7.5290000e-02
  -1.9380000e-02
  -3.4570000e-02
  -5.9990000e-02
   4.3050000e-02
  -5.2150000e-02
   1.6700000e-02
  -1.4180000e-02
   2.3000000e-03
   6.7860000e-02
  -4.3350000e-02
   2.2290000e-02
   3.9130000e-02
   5.3200000e-03
   4.2690000e-02
  -5.7140000e-02
  -2.8270000e-02
  -6.1700000e-03
   1.3630000e-02
   8.0970000e-02
   4.2800000e-02
  -5.4920000e-02
  -6.1330000e-02
  -1.1960000e-01
  -5.1030000e-02
   4.6610000e-02
   2.0670000e-02
   3.3890000e-02
  -3.4930000e-02
  -6.3830000e-02
   7.7000000e-03
   5.8700000e-02
   7.0820000e-02
   1.8890000e-02
   3.1200000e-02
   1.9740000e-02
  -2.3110000e-02
   3.8250000e-02
  -4.7320000e-02
  -2.0590000e-02
  -1.1190000e-02
  -7.2330000e-02
  -4.8370000e-02
  -7.2490000e-02
  -2.8130000e-02
   2.0810000e-02
   2.1250000e-02
   3.8140000e-02
   5.5520000e-02
   5.4970000e-02
   2.2480000e-02
   2.8870000e-02
   6.5970000e-02
   5.9690000e-02
   4.9000000e-04
   6.4200000e-03
  -7.4660000e-02
  -3.1610000e-02
  -7.5100000e-02
   1.8070000e-02
  -7.5700000e-02
  -3.0270000e-02
  -1.6510000e-02
  -5.4840000e-02
   7.3480000e-02
   4.8200000e-02
   7.6990000e-02
   5.1380000e-02
   2.5420000e-02
   3.8910000e-02
  -3.2110000e-02
   8.0800000e-02
  -4.5190000e-02
  -5.1350000e-02
   3.1700000e-02
  -1.6336000e-01
  -2.3660000e-02
   5.6120000e-02
  -6.9120000e-02
   4.4200000e-02
  -1.7990000e-02
  -8.7240000e-02
  -1.2150000e-02
  -4.3350000e-02
  -1.8620000e-02
   6.3720000e-02
   1.1373000e-01
  -6.4700000e-03
  -3.3090000e-02
  -3.6470000e-02
  -5.6560000e-02
   8.7080000e-02
   4.7430000e-02
  -4.3900000e-03
  -5.1800000e-03
  -1.1779000e-01
  -6.1960000e-02
  -8.4060000e-02
  -9.6000000e-04
   7.8110000e-02
  -4.5200000e-03
   7.3100000e-02
  -5.1050000e-02
  -6.6850000e-02
   1.0084000e-01
  -3.6930000e-02
   8.8230000e-02
   8.1930000e-02
  -4.0940000e-02
   5.7500000e-02
   1.6000000e-04
   5.7900000e-03
  -4.8420000e-02
  -1.8260000e-02
  -3.1060000e-02
  -5.5910000e-02
   1.5550000e-02
  -4.9760000e-02
   5.1980000e-02
   1.2480000e-02
  -2.3770000e-02
   1.4800000e-03
  -6.3640000e-02
   5.7440000e-02
   8.6600000e-03
   6.2380000e-02
   2.5640000e-02
  -3.5560000e-02
   4.3700000e-02
  -5.2400000e-02
  -4.9400000e-03
   6.5610000e-02
  -2.3440000e-02
   1.3820000e-02
  -9.5400000e-03
  -9.6920000e-02
   6.2980000e-02
   4.1680000e-02
  -2.9690000e-02
   1.5100000e-03
  -3.5450000e-02
  -8.5020000e-02
   3.8770000e-02
   1.0140000e-02
   2.1850000e-02
   4.2690000e-02
  -1.8840000e-02
   2.2020000e-02
  -2.0870000e-02
   7.8110000e-02
   2.5120000e-02
  -7.7620000e-02
  -8.2800000e-03
  -1.5667000e-01
  -2.7140000e-02
   3.6190000e-02
   1.0500000e-02
   3.0020000e-02
  -6.4620000e-02
  -2.7530000e-02
  -2.4840000e-02
   6.9370000e-02
   2.0070000e-02
  -1.6260000e-02
   5.1790000e-02
  -3.4880000e-02
   5.1660000e-02
   4.1210000e-02
   2.4680000e-02
  -6.3900000e-03
  -3.9650000e-02
  -2.7770000e-02
  -2.8570000e-02
   8.1900000e-02
   3.3970000e-02
  -6.5090000e-02
  -3.3720000e-02
  -4.7240000e-02
  -2.1400000e-03
   1.0364000e-01
  -5.4180000e-02
  -1.1930000e-02
  -2.1440000e-02
  -9.0890000e-02
   2.2590000e-02
   7.1730000e-02
   4.9650000e-02
   8.6530000e-02
  -2.1060000e-02
  -4.6010000e-02
  -7.6200000e-02
  -2.4510000e-02
   1.6480000e-02
  -2.1580000e-02
   3.5450000e-02
   2.4320000e-02
  -1.1800000e-03
   7.6550000e-02
   4.6900000e-03
  -4.5510000e-02
  -1.0830000e-02
  -2.8210000e-02
   2.2800000e-03
   6.1660000e-02
  -4.4000000e-04
  -5.2150000e-02
  -1.7630000e-02
  -4.0940000e-02
   1.0310000e-02
   4.5710000e-02
  -4.1620000e-02
  -2.2400000e-02
  -2.4370000e-02
  -2.7360000e-02
   8.7710000e-02
   3.2130000e-02
   6.1030000e-02
  -1.4890000e-02
   1.8180000e-02
   2.0000000e-03
   3.0540000e-02
   1.2860000e-02
   2.1880000e-02
   3.5890000e-02
  -2.0180000e-02
  -3.6220000e-02
  -1.7580000e-02
  -6.8960000e-02
  -2.5990000e-02
  -3.4140000e-02
  -5.0070000e-02
  -1.1730000e-02
   4.2800000e-03
   1.4780000e-02
   1.6230000e-02
   4.1350000e-02
   2.7910000e-02
  -1.6890000e-02
   2.1250000e-02
   1.9000000e-02
   1.5740000e-02
  -2.9040000e-02
  -5.7410000e-02
  -8.0200000e-02
  -2.3470000e-02
   5.3080000e-02
   1.6830000e-02
  -2.1820000e-02
  -7.3890000e-02
  -8.8750000e-02
  -1.9710000e-02
   4.5840000e-02
   7.0770000e-02
   6.0130000e-02
   2.3090000e-02
   9.4760000e-02
  -4.1370000e-02
   2.9940000e-02
   1.9500000e-03
  -4.0940000e-02
   1.9850000e-02
   1.9880000e-02
  -2.3770000e-02
  -1.9330000e-02
  -3.3150000e-02
  -9.1110000e-02
   7.2100000e-03
   1.9380000e-02
   8.2800000e-03
   7.1600000e-03
   3.7590000e-02
  -1.4370000e-02
   2.8950000e-02
   2.7090000e-02
   2.0480000e-02
   5.7850000e-02
   3.4600000e-02
   2.0920000e-02
  -2.2870000e-02
  -5.2120000e-02
  -2.1610000e-02
  -4.1070000e-02
   4.5840000e-02
   1.1430000e-02
   5.6620000e-02
  -1.4070000e-02
  -2.0920000e-02
  -1.5220000e-02
  -2.2700000e-02
   6.1280000e-02
   4.9980000e-02
  -8.5000000e-03
   6.9900000e-03
  -9.6500000e-03
  -2.3170000e-02
   7.7870000e-02
  -4.7520000e-02
  -1.0630000e-01
  -4.4170000e-02
  -1.1041000e-01
   2.9900000e-03
   4.5540000e-02
   5.0700000e-03
   7.1620000e-02
  -4.5290000e-02
   4.0770000e-02
  -4.0630000e-02
  -3.3700000e-03
   5.7190000e-02
  -3.3860000e-02
   1.2500000e-02
  -2.5310000e-02
  -2.3310000e-02
   2.4900000e-02
  -1.3130000e-02
   2.0300000e-03
   5.5000000e-04
   8.8000000e-04
  -7.8700000e-03
  -3.0300000e-02
  -1.0610000e-02
   6.1090000e-02
   4.5430000e-02
   3.0430000e-02
   1.9190000e-02
   1.4310000e-02
   2.5500000e-03
  -2.6270000e-02
   3.5400000e-03
  -5.4210000e-02
  -4.2110000e-02
  -3.3590000e-02
  -7.8170000e-02
   5.7910000e-02
   4.2530000e-02
   3.2440000e-02
   3.8360000e-02
  -3.7620000e-02
  -1.7270000e-02
   9.8200000e-03
   2.6100000e-02
   6.3900000e-03
   3.4190000e-02
   6.1830000e-02
  -1.8840000e-02
   1.2860000e-02
  -6.7200000e-03
  -7.4030000e-02
   2.5440000e-02
   2.8930000e-02
  -7.2900000e-02
   3.5400000e-03
  -6.0100000e-02
  -4.4660000e-02
   8.1400000e-03
   6.4200000e-03
   5.5700000e-03
   5.1190000e-02
   1.7990000e-02
   4.6450000e-02
   7.3260000e-02
  -1.9490000e-02
   3.7540000e-02
  -2.3030000e-02
   1.4800000e-03
   5.4920000e-02
  -2.0400000e-02
   1.4800000e-03
  -1.0060000e-01
  -7.7950000e-02
  -4.3620000e-02
  -5.9220000e-02
   5.4730000e-02
  -2.2480000e-02
   2.4810000e-02
   1.3790000e-02
   1.1460000e-02
   3.9020000e-02
   2.4430000e-02
   9.1470000e-02
   5.8020000e-02
   1.0310000e-02
   4.5430000e-02
  -6.3000000e-04
  -6.3900000e-03
  -9.4300000e-03
  -1.2780000e-02
  -9.0230000e-02
  -1.4310000e-02
  -4.0060000e-02
  -7.1670000e-02
  -5.6500000e-03
  -1.3270000e-02
  -3.4550000e-02
   7.0110000e-02
   5.4800000e-03
  -4.2090000e-02
   3.0520000e-02
  -2.2200000e-03
   5.2010000e-02
   1.2505000e-01
   2.3990000e-02
  -1.2830000e-02
   4.7400000e-03
  -9.4100000e-02
   2.9560000e-02
   3.3000000e-04
   5.4600000e-03
  -4.0220000e-02
  -6.2650000e-02
  -6.0680000e-02
  -7.0770000e-02
  -5.4600000e-03
  -2.1770000e-02
  -7.4300000e-03
   6.7500000e-02
   3.5260000e-02
   1.0241000e-01
   3.1230000e-02
   3.9700000e-02
  -2.8680000e-02
  -1.2200000e-02
   6.5780000e-02
  -2.1500000e-02
  -2.3900000e-03
  -3.0130000e-02
  -6.1940000e-02
  -1.4040000e-02
  -1.5000000e-02
  -6.7750000e-02
   3.4820000e-02
  -3.8820000e-02
   1.8210000e-02
   4.9900000e-02
  -2.1930000e-02
   4.3130000e-02
  -7.5900000e-03
   4.8170000e-02
   9.3610000e-02
  -4.1100000e-03
   8.1950000e-02
  -6.0840000e-02
  -2.3830000e-02
   8.4400000e-03
  -8.9680000e-02
   3.2050000e-02
  -1.0463000e-01
  -5.2730000e-02
  -2.3220000e-02
  -6.6820000e-02
   8.6200000e-02
   3.8100000e-03
   5.3250000e-02
   8.1290000e-02
  -1.5380000e-02
   6.0680000e-02
   3.1610000e-02
   1.4480000e-02
   3.6110000e-02
  -6.3090000e-02
  -4.5210000e-02
  -3.0200000e-03
  -6.7780000e-02
  -4.9900000e-03
  -4.7570000e-02
  -5.3140000e-02
   7.8000000e-02
  -6.0000000e-03
   1.1980000e-02
   6.2000000e-03
  -1.3850000e-02
   9.9010000e-02
   1.6620000e-02
   7.5760000e-02
  -1.4370000e-02
  -5.3160000e-02
  -2.8270000e-02
  -1.2832000e-01
   5.1000000e-03
  -2.7030000e-02
   1.4800000e-03
   5.7820000e-02
  -3.1940000e-02
   3.2330000e-02
  -1.9330000e-02
  -4.6600000e-03
   6.9310000e-02
   4.8040000e-02
   4.9000000e-02
  -3.8410000e-02
  -5.5080000e-02
  -3.9810000e-02
  -3.6770000e-02
   5.9500000e-03
   4.4860000e-02
  -4.7520000e-02
   2.2480000e-02
  -9.0000000e-04
  -6.0050000e-02
   3.7480000e-02
   2.2890000e-02
   1.8890000e-02
   4.8640000e-02
   4.6100000e-03
  -5.1030000e-02
   1.6590000e-02
  -1.2640000e-02
   8.4500000e-02
   9.7600000e-03
   1.1930000e-02
  -2.1770000e-02
   6.3100000e-03
   3.5750000e-02
  -4.6890000e-02
  -1.7000000e-03
  -5.0560000e-02
  -3.6690000e-02
   5.2640000e-02
   1.0500000e-02
   3.7860000e-02
   2.5170000e-02
   4.4340000e-02
  -4.6670000e-02
   5.7850000e-02
   2.2290000e-02
  -5.5960000e-02
   4.1040000e-02
  -8.4780000e-02
  -4.5190000e-02
   3.9450000e-02
  -5.4640000e-02
   2.1470000e-02
  -2.7690000e-02
   1.7600000e-02
  -1.6000000e-04
  -1.8340000e-02
   5.7690000e-02
  -1.8530000e-02
   1.0567000e-01
   1.4640000e-02
  -5.8700000e-03
   7.0000000e-02
  -9.5610000e-02
  -4.5800000e-03
   1.9700000e-03
  -8.0390000e-02
  -3.0820000e-02
  -6.9310000e-02
  -5.7850000e-02
   7.1750000e-02
   2.3200000e-02
   4.9900000e-03
   2.2760000e-02
   6.8520000e-02
   5.7300000e-02
   4.9080000e-02
   7.7000000e-04
  -4.3680000e-02
   1.8780000e-02
   1.5220000e-02
  -6.9000000e-04
  -1.6830000e-02
  -4.2110000e-02
   3.5040000e-02
  -8.5350000e-02
  -2.8190000e-02
   8.0600000e-03
  -2.0590000e-02
   5.7910000e-02
   3.1910000e-02
  -2.9860000e-02
   1.0720000e-02
  -3.6470000e-02
  -3.5600000e-03
  -2.5860000e-02
   3.5370000e-02
   2.5420000e-02
  -2.4070000e-02
  -4.1900000e-03
  -6.1500000e-02
   2.3470000e-02
   4.4420000e-02
   8.4700000e-03
   3.5730000e-02
  -1.4200000e-02
  -1.3650000e-02
   3.5450000e-02
  -1.0910000e-02
   2.3630000e-02
  -8.1700000e-03
   2.4810000e-02
   1.0700000e-03
  -4.1260000e-02
   1.3490000e-02
   3.7600000e-03
   1.7500000e-03
   5.2260000e-02
  -2.9120000e-02
  -3.3610000e-02
   3.6110000e-02
  -3.0700000e-03
   3.0850000e-02
   5.1740000e-02
  -3.3290000e-02
  -2.1060000e-02
  -6.1910000e-02
  -4.3380000e-02
   5.7520000e-02
   4.2030000e-02
   5.3700000e-03
  -1.0530000e-02
  -2.1330000e-02
   7.3500000e-03
   1.9000000e-04
   1.6090000e-02
   5.1130000e-02
  -2.0370000e-02
   2.4180000e-02
  -4.2990000e-02
  -9.3500000e-02
   9.9300000e-03
  -2.7280000e-02
   2.1330000e-02
   8.1730000e-02
  -6.7230000e-02
   3.2900000e-03
  -3.1000000e-03
  -1.0060000e-02
   1.1861000e-01
   5.3440000e-02
  -1.8070000e-02
  -7.1840000e-02
  -8.6070000e-02
  -4.7080000e-02
   4.2940000e-02
  -4.4690000e-02
  -4.4610000e-02
  -6.4100000e-02
  -6.9830000e-02
  -1.1160000e-02
   5.5470000e-02
   2.8730000e-02
   8.1020000e-02
   5.0260000e-02
  -1.2390000e-02
   2.8790000e-02
   3.9540000e-02
   1.4590000e-02
   2.4180000e-02
   2.6380000e-02
  -2.7530000e-02
  -5.4890000e-02
  -2.1580000e-02
  -5.8180000e-02
  -2.4460000e-02
   1.6040000e-02
  -2.0020000e-02
   2.1410000e-02
   3.7120000e-02
   3.0820000e-02
   4.4800000e-02
   6.7610000e-02
  -1.0280000e-02
   4.1260000e-02
   2.8790000e-02
  -5.0700000e-03
   4.2720000e-02
  -1.9910000e-02
  -6.4190000e-02
  -4.3790000e-02
  -4.7490000e-02
   6.1400000e-03
   3.5100000e-03
   4.8830000e-02
  -2.9390000e-02
  -7.9500000e-03
  -9.3000000e-04
  -2.5800000e-02
   7.6830000e-02
   6.1100000e-03
   1.0310000e-02
   2.2350000e-02
   8.7500000e-03
  -1.0990000e-02
  -4.8800000e-02
  -8.2000000e-03
  -1.5270000e-02
  -2.4130000e-02
   3.5100000e-03
  -1.4810000e-02
   6.4200000e-03
   3.0430000e-02
   4.4250000e-02
   1.8400000e-03
   8.1900000e-02
   1.5770000e-02
   8.2000000e-03
   1.3630000e-02
  -5.6970000e-02
  -2.3580000e-02
  -3.4550000e-02
  -4.7350000e-02
  -3.3370000e-02
   1.0120000e-02
  -1.3570000e-02
   6.8870000e-02
   1.4780000e-02
  -6.6820000e-02
   3.5120000e-02
   3.1010000e-02
   3.0700000e-03
   7.7570000e-02
  -2.7970000e-02
  -6.6790000e-02
   2.8240000e-02
  -6.3170000e-02
   1.3410000e-02
   3.4220000e-02
   2.6840000e-02
  -4.9130000e-02
  -3.8250000e-02
  -5.5410000e-02
  -3.6880000e-02
   8.4750000e-02
  -2.0150000e-02
   1.5790000e-02
   2.6460000e-02
  -4.9710000e-02
   4.4550000e-02
   2.2920000e-02
  -8.4400000e-03
   7.0960000e-02
  -1.7710000e-02
  -3.3290000e-02
  -8.8300000e-03
  -2.2070000e-02
  -1.7710000e-02
   4.1950000e-02
  -2.6900000e-03
   1.0170000e-02
   3.5920000e-02
  -5.7190000e-02
   6.6490000e-02
   3.3700000e-02
   3.4880000e-02
   8.4910000e-02
  -8.0900000e-03
  -4.8260000e-02
  -1.9060000e-02
  -4.3810000e-02
   3.4790000e-02
   2.2350000e-02
  -6.3910000e-02
  -3.0820000e-02
  -3.7590000e-02
  -1.2390000e-02
   1.8210000e-02
  -1.2690000e-02
  -1.1680000e-02
  -1.4640000e-02
   6.9000000e-04
   3.9780000e-02
   8.5540000e-02
   7.4850000e-02
   1.9300000e-02
  -1.2900000e-03
   5.6500000e-03
  -4.1590000e-02
   1.9330000e-02
  -7.7020000e-02
  -6.6380000e-02
  -1.5190000e-02
  -3.1390000e-02
   4.5380000e-02
   3.8060000e-02
  -1.8600000e-03
  -3.2100000e-03
  -1.0720000e-02
   1.5820000e-02
   9.5770000e-02
  -1.3520000e-02
  -1.1570000e-02
  -5.9140000e-02
  -5.9690000e-02
   5.5880000e-02
   2.8510000e-02
  -1.6810000e-02
  -7.3200000e-03
  -6.3750000e-02
  -6.7060000e-02
   1.1020000e-02
  -3.3200000e-03
  -3.2240000e-02
   4.2610000e-02
   4.1700000e-02
  -1.1820000e-02
   1.0487000e-01
  -1.5520000e-02
  -1.0310000e-02
  -9.8400000e-03
  -2.1630000e-02
   5.1000000e-03
   2.1500000e-02
   3.4770000e-02
  -5.7300000e-03
   4.5800000e-03
  -1.8260000e-02
  -2.4400000e-03
  -3.0240000e-02
  -2.3300000e-03
  -3.8100000e-03
   1.2370000e-02
   2.3090000e-02
  -8.2800000e-03
  -9.9500000e-03
  -3.2000000e-02
   4.9020000e-02
   1.2170000e-02
   5.7770000e-02
   2.9860000e-02
   2.1990000e-02
  -3.0350000e-02
  -2.1720000e-02
  -7.4000000e-04
  -1.0990000e-02
   1.7440000e-02
  -2.7690000e-02
  -1.0120000e-02
   4.5000000e-03
  -1.0040000e-02
   1.7470000e-02
  -1.3490000e-02
  -1.7300000e-03
   2.6900000e-02
   5.1550000e-02
   4.9000000e-04
   1.0498000e-01
  -4.6900000e-03
  -2.9420000e-02
  -5.3500000e-03
  -7.5870000e-02
   2.7200000e-02
   7.9290000e-02
  -4.3730000e-02
  -1.9700000e-03
  -3.5860000e-02
  -5.3250000e-02
   3.8360000e-02
  -8.1200000e-03
  -5.1300000e-03
   2.0210000e-02
  -1.9580000e-02
   1.8620000e-02
   7.5100000e-03
  -5.0970000e-02
   7.5900000e-03
   1.9140000e-02
  -2.3330000e-02
   2.8380000e-02
  -2.8320000e-02
  -3.7180000e-02
  -2.2260000e-02
  -2.2870000e-02
   1.0120000e-02
  -4.5200000e-03
  -5.5700000e-03
   1.8620000e-02
   2.6570000e-02
  -1.3460000e-02
   8.6400000e-03
  -6.9750000e-02
  -2.2540000e-02
   3.8820000e-02
  -6.3100000e-03
   1.9060000e-02
  -7.4900000e-03
  -5.8460000e-02
   3.6440000e-02
   5.8620000e-02
   6.7120000e-02
   3.6300000e-02
  -7.7600000e-03
  -3.5200000e-02
   2.2920000e-02
   3.2100000e-03
   6.6050000e-02
  -1.1800000e-03
  -4.4550000e-02
   7.0700000e-03
  -1.3580000e-01
  -1.8180000e-02
   4.2090000e-02
  -3.3700000e-03
   1.5395000e-01
  -7.9510000e-02
   1.0560000e-02
   2.1520000e-02
  -6.1770000e-02
   1.0326000e-01
  -2.4650000e-02
   6.9420000e-02
   3.0520000e-02
  -3.5180000e-02
  -2.7690000e-02
  -8.9080000e-02
  -3.6660000e-02
  -5.3660000e-02
  -6.5580000e-02
  -5.2750000e-02
  -3.8580000e-02
   1.2341000e-01
   8.9900000e-03
   5.8980000e-02
   1.0441000e-01
  -4.7430000e-02
   1.2442000e-01
   2.9090000e-02
  -4.1620000e-02
   6.8160000e-02
  -1.2793000e-01
  -2.8540000e-02
  -3.3830000e-02
  -7.1700000e-02
  -1.9200000e-03
   6.0000000e-04
  -2.2780000e-02
   5.4700000e-02
  -2.3470000e-02
  -2.7690000e-02
   4.2030000e-02
   1.4120000e-02
   4.7710000e-02
   4.1070000e-02
   6.6740000e-02
  -6.6980000e-02
  -2.5250000e-02
  -1.4860000e-02
  -6.9480000e-02
   6.1420000e-02
  -5.9630000e-02
  -7.9810000e-02
   1.0940000e-02
  -3.3260000e-02
   8.0420000e-02
   1.3740000e-02
  -7.6330000e-02
  -1.5900000e-02
  -5.7610000e-02
  -2.0620000e-02
   7.9430000e-02
   7.7810000e-02
   5.3880000e-02
   5.3740000e-02
  -1.6340000e-02
  -1.0457000e-01
  -4.4580000e-02
  -5.9500000e-03
  -8.4750000e-02
   5.2900000e-03
  -2.5660000e-02
  -8.2140000e-02
   7.1700000e-02
  -1.2480000e-02
   1.2860000e-02
   7.6390000e-02
  -1.0390000e-02
   5.7000000e-02
   5.1550000e-02
  -3.5700000e-02
  -4.4470000e-02
  -4.3380000e-02
  -4.5020000e-02
   3.1830000e-02
   2.3630000e-02
  -3.6380000e-02
   1.8860000e-02
   3.8700000e-03
  -1.5900000e-02
   5.7280000e-02
   5.5900000e-03
   8.0060000e-02
   8.3520000e-02
   7.7000000e-03
   1.9690000e-02
  -5.5580000e-02
   2.1360000e-02
   5.8000000e-04
  -1.9820000e-02
   4.8200000e-02
  -3.5230000e-02
   2.2150000e-02
  -9.1600000e-03
   2.5660000e-02
   3.0600000e-02
  -2.1880000e-02
   4.5430000e-02
  -7.3590000e-02
  -2.7970000e-02
   3.4820000e-02
  -2.6900000e-02
   1.0844000e-01
   1.1730000e-02
   3.1530000e-02
   4.8670000e-02
  -2.2650000e-02
   2.9450000e-02
  -1.2451000e-01
   1.2690000e-02
  -3.7400000e-02
  -1.2720000e-02
   2.9150000e-02
  -1.1551000e-01
   1.9690000e-02
  -3.4160000e-02
   1.5900000e-02
   7.5810000e-02
  -4.2640000e-02
   4.8610000e-02
   4.9400000e-03
  -8.0440000e-02
   4.5100000e-02
  -2.0650000e-02
   3.5590000e-02
   2.1190000e-02
  -3.8220000e-02
  -8.7660000e-02
   1.4450000e-02
  -3.2080000e-02
   7.8060000e-02
   5.1350000e-02
  -2.7400000e-03
   6.9640000e-02
  -4.2030000e-02
  -1.8900000e-03
   5.1570000e-02
  -7.4770000e-02
   6.5170000e-02
  -1.1900000e-02
   1.4000000e-04
   1.6940000e-02
   3.3480000e-02
   5.6120000e-02
  -6.2050000e-02
   4.0090000e-02
  -6.1360000e-02
  -3.3700000e-03
   8.6200000e-02
   3.0320000e-02
   3.9210000e-02
  -1.6700000e-02
  -2.7280000e-02
   6.6540000e-02
   6.5610000e-02
   9.8290000e-02
  -1.2040000e-02
  -1.8530000e-02
   9.7300000e-03
  -4.1290000e-02
   3.3400000e-02
   3.2900000e-03
  -3.2110000e-02
   2.8430000e-02
  -2.1820000e-02
  -9.7300000e-03
   4.0830000e-02
   3.7780000e-02
   1.9770000e-02
   4.6990000e-02
   1.0040000e-02
  -5.9990000e-02
   5.9940000e-02
  -3.1560000e-02
   4.3290000e-02
   6.5670000e-02
  -4.2550000e-02
  -1.5960000e-02
  -4.8170000e-02
  -1.2640000e-02
   1.7500000e-03
   4.8280000e-02
   6.1720000e-02
   4.1890000e-02
   2.9940000e-02
   2.7860000e-02
  -9.5400000e-03
   3.8440000e-02
   5.2670000e-02
   3.4960000e-02
   3.3500000e-03
   2.5500000e-02
  -1.5100000e-03
  -1.2750000e-02
  -2.8080000e-02
  -1.4230000e-02
  -4.6970000e-02
  -4.8420000e-02
   1.8890000e-02
  -3.3860000e-02
   4.1890000e-02
   2.6070000e-02
  -5.5900000e-03
   5.9720000e-02
   4.0140000e-02
   2.1170000e-02
  -2.4100000e-03
  -4.8940000e-02
  -2.2320000e-02
   3.2100000e-03
   2.5330000e-02
   4.9850000e-02
   5.5000000e-04
  -2.6920000e-02
  -9.3200000e-03
  -6.2500000e-03
  -7.8960000e-02
   2.7700000e-03
  -1.0860000e-02
  -1.8370000e-02
   1.7960000e-02
  -4.7380000e-02
   5.0500000e-02
   7.1260000e-02
   1.5030000e-02
   1.0200000e-02
  -2.4540000e-02
   1.0640000e-02
  -1.0780000e-02
   1.5330000e-02
  -4.7700000e-03
  -2.7500000e-02
   1.6310000e-02
  -3.0000000e-05
   1.4500000e-02
   4.1350000e-02
  -2.6540000e-02
   1.1210000e-02
  -2.1520000e-02
   5.5400000e-03
   4.4420000e-02
  -1.3190000e-02
   3.9730000e-02
  -1.4700000e-02
   2.3960000e-02
   9.1900000e-03
   3.7890000e-02
   2.7010000e-02
   4.0170000e-02
   3.7560000e-02
   4.1290000e-02
   4.6300000e-03
   1.1100000e-02
  -2.2870000e-02
   2.3000000e-02
   4.2200000e-03
  -3.6440000e-02
  -5.7000000e-03
  -3.1780000e-02
  -1.6830000e-02
   9.0560000e-02
   3.2630000e-02
   3.9590000e-02
   3.7340000e-02
  -3.9780000e-02
   2.7910000e-02
   5.2310000e-02
   1.6700000e-02
  -2.0600000e-03
  -4.2830000e-02
  -3.5180000e-02
   9.7900000e-03
   7.0500000e-03
   3.3860000e-02
  -5.5910000e-02
  -1.9580000e-02
  -6.7120000e-02
  -1.0310000e-02
  -2.0180000e-02
   5.9690000e-02
   5.8620000e-02
   7.2400000e-03
   5.5700000e-03
  -1.2340000e-02
  -1.9300000e-02
   2.1410000e-02
   9.6000000e-04
  -2.7400000e-03
  -4.0740000e-02
   6.1990000e-02
   1.6970000e-02
  -3.3120000e-02
  -1.0780000e-02
  -7.3670000e-02
   1.5350000e-02
  -2.4650000e-02
  -5.0000000e-05
   1.3760000e-02
   3.4190000e-02
   2.6430000e-02
   2.4100000e-02
   1.8700000e-02
   9.6000000e-03
   5.7850000e-02
   2.3900000e-03
  -2.8100000e-02
  -1.3710000e-02
  -4.3070000e-02
  -5.5170000e-02
  -1.2480000e-02
  -3.6770000e-02
  -9.1170000e-02
   4.5000000e-03
  -5.7300000e-03
   2.0760000e-02
   3.4570000e-02
  -1.3350000e-02
  -4.0300000e-03
   4.6450000e-02
   5.5330000e-02
  -3.7480000e-02
   1.3930000e-02
   8.8000000e-04
  -6.8680000e-02
  -7.4000000e-03
   1.7770000e-02
  -3.2160000e-02
  -3.0520000e-02
  -1.4090000e-02
  -7.6910000e-02
   1.0700000e-03
   4.4060000e-02
  -5.3740000e-02
   1.0899000e-01
  -9.1300000e-03
  -2.6600000e-03
   7.4850000e-02
  -4.1890000e-02
   3.5310000e-02
  -5.8000000e-04
  -3.9920000e-02
   4.5430000e-02
  -8.3210000e-02
  -4.8150000e-02
  -1.0954000e-01
  -4.1980000e-02
  -1.2260000e-02
  -1.5980000e-02
   3.5810000e-02
  -7.2380000e-02
  -5.7330000e-02
   2.3740000e-02
  -5.9500000e-03
   1.5138000e-01
   8.3870000e-02
   2.9900000e-03
   1.3050000e-02
  -2.3300000e-03
  -2.8000000e-03
  -1.1520000e-02
  -7.3150000e-02
  -4.1480000e-02
  -3.1200000e-02
   2.1110000e-02
   1.5400000e-03
  -5.1110000e-02
  -3.4000000e-02
   8.9900000e-03
  -4.2800000e-02
   7.6990000e-02
  -7.8700000e-03
  -5.8400000e-03
  -1.3270000e-02
   2.0890000e-02
   1.6590000e-02
  -2.5030000e-02
   1.4120000e-02
  -4.9130000e-02
  -7.3700000e-02
   5.0610000e-02
  -6.7860000e-02
   3.0160000e-02
   2.3770000e-02
  -7.9700000e-02
   2.6840000e-02
  -1.0493000e-01
  -3.1370000e-02
   3.0130000e-02
  -1.8590000e-02
   6.2710000e-02
  -6.6600000e-03
  -2.2870000e-02
   7.1530000e-02
   4.0990000e-02
   7.9790000e-02
   3.9810000e-02
  -3.3810000e-02
  -4.2250000e-02
  -6.3770000e-02
  -1.1014000e-01
  -4.0190000e-02
  -4.2690000e-02
  -4.5500000e-03
   8.5800000e-03
  -5.8700000e-03
   2.3440000e-02
   3.3720000e-02
   2.9750000e-02
   8.3900000e-03
  -1.0170000e-02
   1.2100000e-03
  -3.6300000e-02
   5.1520000e-02
  -1.1270000e-02
  -2.9390000e-02
   7.8740000e-02
  -2.5330000e-02
   8.0100000e-03
   1.5110000e-02
  -8.6720000e-02
  -2.5000000e-03
   4.5710000e-02
  -8.2360000e-02
   3.3200000e-02
  -1.8260000e-02
  -5.1800000e-03
   3.2100000e-03
   1.2040000e-02
   4.3000000e-03
  -1.3300000e-02
   3.2190000e-02
  -4.7460000e-02
  -1.9360000e-02
  -9.3200000e-03
  -9.6460000e-02
   4.3700000e-02
  -4.4280000e-02
   2.4650000e-02
   9.8240000e-02
  -3.7670000e-02
   6.0000000e-04
  -2.4730000e-02
  -9.4920000e-02
   5.5080000e-02
  -1.2040000e-02
  -4.7490000e-02
   2.5750000e-02
  -2.9390000e-02
  -1.4890000e-02
   2.0370000e-02
  -3.2220000e-02
  -4.2690000e-02
   5.9220000e-02
  -2.2500000e-03
   2.2400000e-02
   5.8870000e-02
  -8.3130000e-02
  -2.1080000e-02
  -2.5030000e-02
  -4.3810000e-02
   5.3000000e-02
   1.4970000e-02
  -2.3910000e-02
   4.1570000e-02
   1.3270000e-02
  -1.2947000e-01
   1.2200000e-02
  -2.4730000e-02
  -8.2500000e-03
   1.1642000e-01
   7.0700000e-03
  -1.0090000e-02
   4.0190000e-02
  -7.0850000e-02
   1.5600000e-02
   7.7730000e-02
   1.6830000e-02
  -1.6420000e-02
  -2.6070000e-02
  -4.6010000e-02
  -2.1140000e-02
   7.2400000e-03
  -3.9590000e-02
   4.1700000e-03
  -1.1190000e-02
   3.1120000e-02
   2.3500000e-02
  -1.9470000e-02
  -9.9300000e-03
  -5.5600000e-02
  -3.7730000e-02
   3.6000000e-04
  -2.0590000e-02
   7.7000000e-04
   5.6150000e-02
  -5.7190000e-02
  -7.3500000e-03
  -8.1400000e-03
  -5.3050000e-02
   4.6450000e-02
   3.9450000e-02
  -1.4480000e-02
   1.2370000e-02
  -2.3770000e-02
  -1.9000000e-04
   2.5530000e-02
   2.3740000e-02
  -5.5080000e-02
  -1.9170000e-02
  -2.2810000e-02
  -3.5040000e-02
   4.2530000e-02
  -3.2850000e-02
   1.0140000e-02
   5.0400000e-03
  -6.1700000e-03
   1.7850000e-02
  -2.0970000e-02
  -3.4850000e-02
   2.9060000e-02
  -3.2550000e-02
   7.8420000e-02
   1.1570000e-02
   2.3770000e-02
  -1.8780000e-02
  -5.0970000e-02
   6.7780000e-02
   3.2400000e-03
   3.9200000e-03
  -2.6790000e-02
  -1.3372000e-01
   3.6770000e-02
  -5.2010000e-02
   5.6450000e-02
   3.1120000e-02
  -5.1000000e-02
   6.0270000e-02
  -7.7600000e-03
   1.7880000e-02
   5.9470000e-02
  -3.9870000e-02
   2.7560000e-02
  -1.9710000e-02
  -6.3530000e-02
  -1.5110000e-02
   4.4100000e-03
   5.7600000e-03
  -5.5550000e-02
  -3.6330000e-02
  -7.8310000e-02
  -2.7580000e-02
   6.0130000e-02
  -3.6990000e-02
   8.6040000e-02
   3.3720000e-02
   6.6000000e-04
   6.0900000e-02
  -3.0050000e-02
  -2.7640000e-02
   1.0008000e-01
  -4.5510000e-02
   5.7960000e-02
  -2.1060000e-02
  -8.4560000e-02
  -1.6480000e-02
  -7.8360000e-02
   9.0000000e-04
   5.5400000e-03
   1.3000000e-02
   1.0750000e-02
   8.5500000e-03
  -6.9200000e-02
  -8.2000000e-03
   6.0430000e-02
   1.4450000e-02
   6.7090000e-02
   8.8810000e-02
  -4.9220000e-02
   2.7830000e-02
  -1.6890000e-02
  -7.0520000e-02
   4.6780000e-02
  -4.6250000e-02
  -1.3380000e-02
  -3.2520000e-02
  -5.8370000e-02
   1.1730000e-02
  -5.1240000e-02
  -2.0730000e-02
  -7.7100000e-02
   1.7850000e-02
  -6.5300000e-03
  -3.7510000e-02
   4.1040000e-02
   7.4000000e-04
   3.6110000e-02
   8.4200000e-02
   2.1700000e-03
   5.4370000e-02
   1.7740000e-02
  -4.4000000e-04
   4.1510000e-02
  -1.7330000e-02
  -2.1170000e-02
  -6.6300000e-02
  -5.0010000e-02
  -7.0440000e-02
  -6.3880000e-02
  -3.3150000e-02
   8.2000000e-03
   1.0830000e-01
   6.5420000e-02
   4.4420000e-02
   4.3400000e-02
  -3.9670000e-02
   1.3520000e-02
   2.5390000e-02
   1.9440000e-02
   6.8570000e-02
  -2.0000000e-03
  -4.6060000e-02
  -8.4500000e-02
  -1.1554000e-01
  -3.7450000e-02
  -3.7290000e-02
  -6.2000000e-03
  -5.2100000e-03
  -3.1340000e-02
   3.4330000e-02
   2.8160000e-02
   1.9520000e-02
   1.0890000e-01
   4.9980000e-02
   5.6020000e-02
   1.1719000e-01
  -1.7410000e-02
  -5.8980000e-02
  -3.4380000e-02
  -1.4795000e-01
  -4.8530000e-02
  -1.2420000e-02
  -1.0890000e-01
  -8.3600000e-03
  -9.0800000e-03
  -2.1580000e-02
   8.7330000e-02
   4.4860000e-02
  -8.8000000e-03
   5.2860000e-02
  -3.1800000e-03
   4.2550000e-02
   5.2340000e-02
   1.6000000e-04
   9.7900000e-03
  -7.6470000e-02
  -6.7340000e-02
  -3.5260000e-02
   1.1730000e-02
   8.4700000e-03
  -3.7590000e-02
  -3.4770000e-02
  -5.7300000e-03
  -1.4610000e-02
   4.1020000e-02
   2.4540000e-02
   1.6670000e-02
   1.3410000e-01
   2.6300000e-03
   4.1370000e-02
  -3.6700000e-03
  -4.5190000e-02
   5.9440000e-02
  -6.8900000e-02
   4.0830000e-02
  -6.7700000e-03
  -5.5690000e-02
   2.8950000e-02
  -4.2990000e-02
   1.9700000e-03
  -3.4000000e-03
  -2.9420000e-02
  -2.5750000e-02
  -3.3450000e-02
   5.7220000e-02
   3.7860000e-02
   4.0960000e-02
   1.8510000e-02
  -5.6700000e-02
   2.6020000e-02
  -7.2600000e-02
  -1.5850000e-02
   2.1720000e-02
  -4.2800000e-02
   1.5850000e-02
  -3.6410000e-02
  -8.2830000e-02
   4.6140000e-02
   2.4650000e-02
   3.9540000e-02
   4.3540000e-02
  -4.2090000e-02
  -6.3990000e-02
  -5.2070000e-02
  -2.2670000e-02
   5.5630000e-02
   4.4720000e-02
   9.1910000e-02
  -1.9140000e-02
  -7.0880000e-02
   1.3520000e-02
  -7.8580000e-02
   3.8700000e-03
   9.0100000e-02
  -2.9800000e-02
   2.9100000e-03
   3.1530000e-02
  -6.8220000e-02
   9.5100000e-03
   6.4320000e-02
  -5.4970000e-02
   1.8340000e-02
   1.1285000e-01
  -4.4090000e-02
   6.2070000e-02
   1.2940000e-02
  -1.1063000e-01
  -9.1000000e-03
  -2.3610000e-02
  -4.3510000e-02
   5.5330000e-02
  -1.2450000e-02
  -3.8850000e-02
   6.1400000e-03
  -6.7060000e-02
   2.1330000e-02
   2.6980000e-02
   3.5590000e-02
  -2.4350000e-02
  -1.9960000e-02
   1.7000000e-02
  -4.4470000e-02
   6.6740000e-02
  -1.2170000e-02
   4.3300000e-03
  -1.3130000e-02
  -1.0610000e-02
  -1.0990000e-02
  -2.8840000e-02
   1.0561000e-01
  -9.8380000e-02
  -7.8700000e-03
   3.4820000e-02
  -7.5870000e-02
   1.3320000e-01
  -5.6800000e-03
   2.8510000e-02
   7.2740000e-02
  -6.5910000e-02
   1.0940000e-02
  -2.1900000e-03
  -3.4220000e-02
  -1.7380000e-02
  -6.5890000e-02
  -2.1280000e-02
  -2.5800000e-02
   1.8230000e-02
   4.7240000e-02
  -1.4090000e-02
   7.9180000e-02
   3.5450000e-02
  -1.9110000e-02
   7.7790000e-02
   6.2800000e-03
   5.3380000e-02
   7.6410000e-02
  -5.8320000e-02
  -3.4500000e-03
  -6.9340000e-02
  -8.0860000e-02
  -2.6240000e-02
  -3.5970000e-02
  -8.1700000e-03
   2.0620000e-02
   2.7060000e-02
  -5.2000000e-04
   5.8400000e-03
   1.5410000e-02
  -3.2680000e-02
   4.1790000e-02
   3.1750000e-02
  -2.9780000e-02
   4.6470000e-02
   2.5640000e-02
  -3.0110000e-02
   4.3160000e-02
  -7.0190000e-02
  -6.2980000e-02
   1.0780000e-02
  -8.6040000e-02
   1.3710000e-02
  -9.1250000e-02
  -2.7970000e-02
  -1.4890000e-02
  -4.2580000e-02
   1.3701000e-01
   5.8620000e-02
   4.6990000e-02
   9.9280000e-02
  -1.0948000e-01
   1.9330000e-02
   1.1430000e-02
  -4.7520000e-02
   6.2160000e-02
   9.9000000e-04
  -4.0360000e-02
  -5.9000000e-02
  -2.3830000e-02
  -4.3160000e-02
  -2.7090000e-02
  -8.6400000e-03
  -5.2860000e-02
   2.9500000e-02
   1.3248000e-01
   5.7500000e-02
   7.9590000e-02
  -1.8400000e-03
  -9.9250000e-02
   1.7330000e-02
  -3.0960000e-02
   6.9310000e-02
   1.6700000e-02
  -2.5800000e-02
  -6.5500000e-03
  -2.2780000e-02
   2.3030000e-02
   3.4350000e-02
  -2.4700000e-03
  -4.5200000e-03
  -7.5900000e-03
  -6.1400000e-03
   2.2510000e-02
   1.6810000e-02
   2.0180000e-02
   6.1390000e-02
   2.2290000e-02
  -4.7200000e-03
  -2.3030000e-02
  -6.8930000e-02
  -3.9540000e-02
  -7.7180000e-02
  -8.9700000e-03
  -4.7700000e-03
   7.5350000e-02
   1.6090000e-02
   2.0320000e-02
   2.3110000e-02
  -5.5380000e-02
   3.8360000e-02
  -3.5600000e-03
  -6.2760000e-02
   4.4720000e-02
  -4.9600000e-03
  -5.1800000e-03
   2.7280000e-02
  -8.8000000e-04
  -5.0070000e-02
  -8.0100000e-03
  -1.1222000e-01
  -4.7600000e-02
   3.9870000e-02
   4.4100000e-03
   5.2810000e-02
   1.7380000e-02
  -5.3790000e-02
   6.3880000e-02
   1.0010000e-01
   2.6510000e-02
   6.9560000e-02
  -7.4110000e-02
  -7.4110000e-02
  -2.7610000e-02
   2.2350000e-02
   3.2490000e-02
  -1.0720000e-02
  -3.3150000e-02
  -9.6350000e-02
  -4.7980000e-02
   4.3000000e-03
   1.1840000e-02
   9.3110000e-02
   3.9780000e-02
   3.1060000e-02
   5.0260000e-02
  -3.7010000e-02
   7.5130000e-02
   2.4700000e-02
   1.1630000e-02
   3.7340000e-02
  -9.7690000e-02
  -9.4020000e-02
  -1.2230000e-02
  -8.6750000e-02
   4.4390000e-02
   1.5270000e-02
  -3.1280000e-02
   6.5470000e-02
  -4.5840000e-02
   1.5400000e-03
   2.3250000e-02
  -1.4420000e-02
   6.7390000e-02
   3.4820000e-02
   1.4450000e-02
   2.9670000e-02
  -2.4070000e-02
  -4.3180000e-02
   2.8270000e-02
  -3.0900000e-02
  -2.8570000e-02
   2.8570000e-02
   1.2280000e-02
  -2.4460000e-02
   6.8930000e-02
  -7.1970000e-02
   4.8420000e-02
   7.8690000e-02
  -2.3470000e-02
   7.0990000e-02
  -5.5410000e-02
  -5.7220000e-02
  -1.0940000e-02
   1.4610000e-02
   8.6830000e-02
   8.0470000e-02
  -9.1900000e-03
  -2.2620000e-02
   4.4100000e-03
  -7.5700000e-03
  -3.5890000e-02
  -4.5050000e-02
  -5.2120000e-02
  -2.9260000e-02
   2.9970000e-02
  -2.5000000e-04
  -2.1800000e-02
   2.2810000e-02
   3.8900000e-03
   2.5140000e-02
   8.0280000e-02
   8.9400000e-03
   6.7500000e-02
  -7.2300000e-02
  -8.4750000e-02
  -2.3900000e-03
  -6.0130000e-02
   1.2670000e-02
  -3.6380000e-02
  -8.4450000e-02
   9.2900000e-03
   3.6000000e-04
  -2.9970000e-02
   6.5670000e-02
   2.2500000e-03
  -1.4590000e-02
   6.7700000e-02
  -1.3240000e-02
  -2.0970000e-02
   4.6100000e-03
  -1.3020000e-02
   3.3890000e-02
   4.0500000e-02
   1.1190000e-02
  -3.1340000e-02
  -4.0330000e-02
  -3.6690000e-02
  -1.2170000e-02
  -1.1190000e-02
  -1.8970000e-02
  -3.2980000e-02
   4.3620000e-02
   6.5610000e-02
  -1.0060000e-02
   2.7970000e-02
   5.9200000e-03
   7.5590000e-02
   1.0435000e-01
   6.5860000e-02
   8.0300000e-03
  -2.6870000e-02
  -7.1590000e-02
   6.6600000e-03
   3.8030000e-02
  -3.6520000e-02
  -2.7000000e-04
  -8.2390000e-02
  -5.7440000e-02
   2.3360000e-02
  -2.2000000e-04
   4.9600000e-02
   5.4840000e-02
   4.4400000e-03
   2.5550000e-02
  -1.5100000e-03
   3.0300000e-02
   2.0840000e-02
   2.3520000e-02
  -1.1840000e-02
   1.4590000e-02
   5.0920000e-02
  -1.1060000e-01
  -1.9330000e-02
  -6.3610000e-02
  -5.1300000e-02
   7.0520000e-02
  -7.9460000e-02
  -7.3200000e-03
  -9.5100000e-03
   8.6900000e-03
   8.4940000e-02
  -2.0670000e-02
   6.0570000e-02
   1.0780000e-02
   8.5000000e-04
   5.1770000e-02
   9.9000000e-04
  -3.2980000e-02
  -1.3080000e-02
  -6.0050000e-02
  -3.3480000e-02
  -5.8400000e-02
   2.0120000e-02
  -4.0550000e-02
  -2.6600000e-02
  -3.3000000e-04
  -2.4050000e-02
   3.2600000e-02
   3.2350000e-02
   2.5500000e-02
   3.4250000e-02
  -7.2900000e-03
   4.1650000e-02
   2.7340000e-02
   4.2250000e-02
   5.2780000e-02
  -2.1030000e-02
  -2.6980000e-02
  -9.5360000e-02
  -2.5910000e-02
   1.4260000e-02
   1.8780000e-02
   3.8190000e-02
  -7.0740000e-02
  -1.7820000e-02
  -3.1310000e-02
   2.8500000e-03
   7.8530000e-02
   1.9250000e-02
   1.6070000e-02
   1.5130000e-02
  -3.2600000e-02
   5.6780000e-02
   5.8100000e-02
  -1.4310000e-02
   4.0170000e-02
   1.0400000e-03
  -4.4140000e-02
  -1.9220000e-02
  -9.1490000e-02
  -2.9420000e-02
   9.3500000e-03
  -3.0110000e-02
  -3.5010000e-02
  -2.8760000e-02
   4.9400000e-03
   4.4660000e-02
   4.5840000e-02
   1.5600000e-03
   8.6260000e-02
   5.6290000e-02
   5.9550000e-02
   3.9730000e-02
  -1.5570000e-02
  -5.2920000e-02
  -1.2260000e-02
  -5.8040000e-02
  -6.6490000e-02
  -8.2300000e-03
   1.6700000e-03
  -4.2940000e-02
   6.3940000e-02
  -8.0600000e-03
   3.1670000e-02
   3.8710000e-02
  -5.8400000e-03
   1.4970000e-02
   5.3550000e-02
   2.7690000e-02
   9.7600000e-03
   5.9800000e-03
   9.8400000e-03
  -1.3330000e-02
   2.0540000e-02
  -7.3100000e-02
  -5.4340000e-02
  -3.0460000e-02
  -1.6940000e-02
   2.9360000e-02
   1.5900000e-02
  -2.7640000e-02
  -4.5460000e-02
  -1.4700000e-02
  -2.7360000e-02
  -1.8600000e-03
   9.0590000e-02
   2.7470000e-02
   3.1340000e-02
   4.0740000e-02
  -8.7110000e-02
   4.0900000e-03
   2.4570000e-02
  -9.6500000e-03
   3.9070000e-02
  -1.0153000e-01
  -9.2670000e-02
  -1.2717000e-01
  -1.3000000e-02
   8.6890000e-02
  -3.3700000e-03
   9.6790000e-02
  -6.0000000e-04
   5.0200000e-03
   1.0142000e-01
   2.9090000e-02
   8.6180000e-02
   6.6410000e-02
  -2.8790000e-02
  -3.1750000e-02
  -2.6270000e-02
  -2.7000000e-04
  -2.4240000e-02
  -2.5060000e-02
  -1.1091000e-01
  -4.4170000e-02
  -1.2940000e-02
  -3.9260000e-02
   5.6890000e-02
  -4.4860000e-02
   3.4050000e-02
   7.4880000e-02
   3.4550000e-02
   1.3852000e-01
   1.0140000e-02
  -2.5170000e-02
   8.6900000e-03
  -4.4910000e-02
  -4.2360000e-02
   2.2350000e-02
  -3.8170000e-02
  -1.1930000e-02
  -1.4200000e-02
  -6.4730000e-02
  -3.8930000e-02
  -8.3100000e-03
   6.8300000e-03
   2.5770000e-02
   6.0180000e-02
   4.6910000e-02
   3.3810000e-02
   5.7390000e-02
   3.9100000e-02
   3.8550000e-02
  -3.6500000e-03
  -9.4000000e-03
  -5.0530000e-02
  -6.9420000e-02
  -3.7340000e-02
   1.1000000e-03
  -7.8800000e-02
  -4.3570000e-02
  -2.3610000e-02
  -2.8680000e-02
   9.5520000e-02
   1.7710000e-02
  -7.9900000e-02
   6.6210000e-02
  -4.1240000e-02
   8.2830000e-02
   1.2089000e-01
   3.1670000e-02
   7.8030000e-02
  -4.5950000e-02
  -4.1760000e-02
  -7.5150000e-02
  -5.1900000e-02
   2.5500000e-03
  -2.3990000e-02
  -3.2630000e-02
  -3.9980000e-02
  -2.9280000e-02
   3.5420000e-02
  -3.3120000e-02
   8.4610000e-02
  -1.9690000e-02
   9.6000000e-03
   9.3990000e-02
  -1.0170000e-02
   7.1420000e-02
   7.0880000e-02
  -5.1930000e-02
   6.3170000e-02
  -3.3200000e-02
  -7.1420000e-02
  -7.0960000e-02
  -1.0496000e-01
  -5.4530000e-02
   9.9800000e-03
   5.0420000e-02
   2.1410000e-02
   2.2150000e-02
   5.2120000e-02
  -2.7250000e-02
   4.2420000e-02
  -3.6000000e-04
   1.1240000e-02
   3.4270000e-02
  -4.0060000e-02
   9.6500000e-03
   2.8050000e-02
   4.5800000e-03
   3.2350000e-02
   1.7190000e-02
  -3.8470000e-02
   1.2280000e-02
  -8.5500000e-03
  -3.2760000e-02
   3.4570000e-02
  -5.2090000e-02
  -3.2130000e-02
  -1.8900000e-03
  -2.6350000e-02
   6.6570000e-02
   2.0400000e-02
   4.2740000e-02
   5.8650000e-02
  -6.9920000e-02
   2.9450000e-02
   2.9300000e-03
  -2.6380000e-02
   6.3910000e-02
  -5.7300000e-03
  -4.7600000e-02
  -2.9280000e-02
  -1.8123000e-01
  -7.5210000e-02
   1.1870000e-02
   3.9980000e-02
   5.9610000e-02
   3.6030000e-02
  -1.8370000e-02
  -8.4400000e-03
   6.8960000e-02
   4.4690000e-02
   7.1530000e-02
   5.6540000e-02
  -3.6030000e-02
  -3.0960000e-02
  -9.4290000e-02
  -3.2550000e-02
  -1.0230000e-02
  -3.6250000e-02
   2.4870000e-02
  -3.7730000e-02
  -4.1700000e-03
   1.8100000e-03
   5.7300000e-03
   1.0553000e-01
   4.2910000e-02
   7.9400000e-02
   2.3940000e-02
   5.2400000e-03
   1.3790000e-02
   2.1900000e-03
   3.9370000e-02
  -6.7150000e-02
  -1.0076000e-01
  -4.8780000e-02
  -1.0685000e-01
  -1.8340000e-02
  -2.9900000e-03
  -4.1840000e-02
   6.4950000e-02
   2.6490000e-02
   5.1000000e-03
   4.7820000e-02
   1.3960000e-02
   6.3450000e-02
   3.8330000e-02
   2.5060000e-02
  -2.8840000e-02
  -3.3290000e-02
  -4.2850000e-02
  -7.3650000e-02
  -3.3480000e-02
  -2.0040000e-02
   1.9990000e-02
   3.2710000e-02
  -3.5100000e-03
  -5.8180000e-02
  -1.4000000e-03
   4.2280000e-02
   1.8070000e-02
   4.1370000e-02
  -5.6180000e-02
   4.8370000e-02
   2.2260000e-02
   1.7380000e-02
   5.7660000e-02
  -4.9600000e-02
   9.0200000e-03
  -1.4090000e-02
  -1.2571000e-01
  -4.4400000e-03
  -3.1450000e-02
   3.0300000e-02
   6.4570000e-02
  -2.5880000e-02
  -3.9200000e-03
  -6.2000000e-03
   2.2040000e-02
   1.6670000e-02
   4.9870000e-02
   9.9300000e-03
  -4.7710000e-02
   4.5160000e-02
  -4.2960000e-02
   2.5000000e-03
   1.7050000e-02
  -8.7790000e-02
   3.7950000e-02
   2.7170000e-02
  -4.0550000e-02
   3.0350000e-02
  -3.2000000e-02
  -2.0600000e-03
   4.9540000e-02
  -3.6900000e-02
   5.1850000e-02
  -1.2340000e-02
   1.4780000e-02
   8.6310000e-02
  -4.8670000e-02
   3.4160000e-02
   4.3810000e-02
   2.9600000e-03
  -1.6500000e-03
  -8.2010000e-02
  -7.6630000e-02
  -2.0700000e-02
   1.3200000e-03
   8.1400000e-03
   9.2900000e-03
  -1.0530000e-02
  -5.9960000e-02
   5.1440000e-02
  -1.6620000e-02
   2.1850000e-02
   8.2060000e-02
  -8.1840000e-02
   1.9630000e-02
   9.3000000e-04
  -5.3900000e-02
   4.0850000e-02
  -5.2000000e-04
  -1.8840000e-02
   2.5000000e-03
   2.3910000e-02
   2.7530000e-02
   1.6480000e-02
   6.3600000e-03
  -7.0680000e-02
  -3.0380000e-02
   2.2000000e-04
  -4.5200000e-03
  -3.3090000e-02
   2.0370000e-02
   3.3640000e-02
   3.0490000e-02
   7.1640000e-02
  -1.8560000e-02
  -1.3080000e-02
  -1.8480000e-02
  -2.3310000e-02
   1.1270000e-02
  -2.6730000e-02
   5.1300000e-02
  -6.1580000e-02
   4.7400000e-03
  -6.6320000e-02
  -9.3110000e-02
   2.1300000e-02
   1.9330000e-02
   2.7610000e-02
   8.3400000e-03
  -2.8980000e-02
   1.1460000e-02
   3.7750000e-02
   7.6360000e-02
   3.0210000e-02
   5.6070000e-02
  -4.6560000e-02
  -2.2200000e-03
  -3.3530000e-02
  -1.9600000e-02
   6.0160000e-02
   7.6200000e-03
  -4.2200000e-02
  -7.2400000e-03
  -3.0000000e-02
  -2.4510000e-02
   2.6300000e-03
   3.0200000e-03
  -7.6880000e-02
   1.3410000e-02
   5.1800000e-03
   4.9110000e-02
   1.2996000e-01
   7.0490000e-02
   2.3140000e-02
   4.6530000e-02
  -1.2720000e-02
  -3.1000000e-03
  -5.2420000e-02
  -7.2000000e-02
  -8.8040000e-02
  -6.2050000e-02
  -6.8000000e-03
  -5.9500000e-03
  -1.1410000e-02
  -3.1150000e-02
  -6.0900000e-03
   2.5470000e-02
   3.8030000e-02
   8.9550000e-02
   3.1640000e-02
   2.5720000e-02
   9.1470000e-02
  -1.8950000e-02
   1.2300000e-03
   1.9710000e-02
  -7.6580000e-02
  -6.4320000e-02
  -5.1130000e-02
  -8.2040000e-02
  -1.0345000e-01
   1.1460000e-02
  -2.4320000e-02
   4.9930000e-02
   1.1159000e-01
  -1.9820000e-02
   1.9770000e-02
   4.8500000e-02
  -1.6700000e-02
   6.9070000e-02
   4.9630000e-02
  -4.5460000e-02
  -7.4600000e-03
  -5.2450000e-02
  -9.9390000e-02
   1.8420000e-02
  -6.6020000e-02
  -7.4300000e-03
   6.7780000e-02
  -1.1630000e-02
   5.0390000e-02
   2.5200000e-02
  -5.7440000e-02
   1.3110000e-02
   5.3660000e-02
   2.0870000e-02
  -1.2940000e-02
  -3.0790000e-02
  -8.3490000e-02
  -5.1220000e-02
  -1.2690000e-02
  -8.0000000e-04
   4.4640000e-02
   1.4780000e-02
  -2.1190000e-02
   2.8680000e-02
  -2.5880000e-02
   1.3080000e-02
   7.5260000e-02
  -1.1680000e-02
   3.0870000e-02
  -1.2230000e-02
  -2.1800000e-02
   6.1550000e-02
   4.4440000e-02
  -2.5280000e-02
  -3.7300000e-03
  -5.2640000e-02
   7.5100000e-03
   5.4620000e-02
   3.8440000e-02
   3.2110000e-02
   1.2600000e-03
   4.9100000e-03
  -3.3070000e-02
  -5.7520000e-02
   2.7000000e-04
  -3.4220000e-02
   3.0110000e-02
   5.7820000e-02
  -1.0010000e-02
   2.6600000e-02
  -1.7440000e-02
   5.1500000e-03
  -2.6870000e-02
   1.3110000e-02
   3.9800000e-03
  -3.7970000e-02
   1.8070000e-02
  -3.1090000e-02
  -8.6010000e-02
   5.9280000e-02
  -4.1980000e-02
  -2.2320000e-02
   9.4000000e-03
   6.2800000e-03
   5.3630000e-02
   5.8760000e-02
  -5.4070000e-02
  -1.5330000e-02
  -4.9430000e-02
   2.8840000e-02
   7.7240000e-02
  -2.8500000e-03
  -1.2060000e-02
  -8.1380000e-02
  -5.3080000e-02
  -3.5070000e-02
  -5.0970000e-02
   4.9820000e-02
   3.8030000e-02
   2.4920000e-02
   3.3310000e-02
  -6.5420000e-02
  -1.3630000e-02
   1.4000000e-03
   3.8000000e-04
   5.2810000e-02
   1.3240000e-02
   8.5500000e-03
   1.6530000e-02
   3.2330000e-02
  -3.7800000e-03
  -2.5440000e-02
  -7.3800000e-03
  -5.4120000e-02
   1.6560000e-02
   3.1200000e-02
   1.7160000e-02
   3.0790000e-02
  -5.8650000e-02
  -2.9640000e-02
   6.5500000e-03
   3.7290000e-02
   6.8380000e-02
   6.3010000e-02
   4.1730000e-02
   2.5000000e-03
  -2.4760000e-02
   1.9000000e-04
  -2.8200000e-03
   3.2270000e-02
   1.9660000e-02
   1.1680000e-02
  -1.8600000e-03
  -5.5600000e-02
  -5.7610000e-02
  -2.6510000e-02
  -7.1890000e-02
   3.6030000e-02
   4.1950000e-02
  -4.6750000e-02
   8.0170000e-02
  -3.8740000e-02
   3.3940000e-02
   9.9610000e-02
  -3.7840000e-02
   5.0810000e-02
  -3.3310000e-02
  -3.6770000e-02
  -4.3210000e-02
  -8.3100000e-02
  -8.0970000e-02
  -8.1820000e-02
  -3.1500000e-02
  -6.6100000e-03
  -1.8010000e-02
   8.7680000e-02
   3.1860000e-02
   3.9510000e-02
   6.6380000e-02
  -6.1700000e-03
   2.7170000e-02
   2.8800000e-03
  -2.7010000e-02
  -4.3300000e-03
   1.9500000e-03
  -4.5380000e-02
   2.5060000e-02
  -8.0000000e-05
  -1.2890000e-02
   9.8020000e-02
  -4.8260000e-02
   5.9500000e-03
   5.7610000e-02
  -3.8850000e-02
   3.4110000e-02
  -4.0440000e-02
  -2.8160000e-02
   2.7100000e-03
   4.0900000e-03
   4.6280000e-02
   2.9900000e-03
   4.0880000e-02
   3.3750000e-02
  -3.8220000e-02
   4.2310000e-02
  -4.7190000e-02
  -3.4520000e-02
   5.1710000e-02
  -5.3580000e-02
   8.0360000e-02
  -4.4830000e-02
  -3.3500000e-03
   1.0500000e-02
  -5.7110000e-02
   2.0950000e-02
  -5.5060000e-02
