# Supplementary material for: A Novel Classification Method for Flutter Signals Based on the CNN and STFT
Source: Hindawi journal article supplement (doi:10.1155/2019/9375437), 2019-04-09
Supplement: f1 [file 9375437.f1.zip › 00_25_z18.0_27channel.txt]

   4.5490000e-02
  -9.4000000e-03
  -3.8100000e-03
  -1.4310000e-02
  -3.6270000e-02
   1.2480000e-02
  -1.8480000e-02
  -6.2490000e-02
  -8.5800000e-03
   3.1910000e-02
   5.4290000e-02
   6.7060000e-02
   4.0900000e-03
  -1.5300000e-02
  -1.7300000e-03
   2.5580000e-02
   2.4480000e-02
  -1.7790000e-02
  -5.2400000e-02
  -5.4860000e-02
  -2.6950000e-02
   3.1300000e-03
  -3.0000000e-05
  -2.9530000e-02
  -2.9450000e-02
   7.4000000e-03
   2.2570000e-02
   1.8970000e-02
  -2.4210000e-02
  -1.2450000e-02
   4.4530000e-02
  -6.6000000e-04
  -2.6210000e-02
  -1.5220000e-02
  -5.8150000e-02
  -4.5730000e-02
   3.3480000e-02
   5.1440000e-02
   4.1680000e-02
   2.1930000e-02
  -5.9800000e-03
  -7.4000000e-03
   6.0000000e-04
   1.1050000e-02
   1.3190000e-02
  -3.2600000e-02
  -4.8940000e-02
  -7.6550000e-02
  -6.5450000e-02
   1.9200000e-03
  -1.1350000e-02
   4.8260000e-02
   1.0438000e-01
   6.8500000e-03
  -1.6200000e-02
   1.1350000e-02
  -1.6700000e-02
   7.7000000e-03
   1.7300000e-03
  -5.1850000e-02
  -3.5510000e-02
  -1.6620000e-02
  -3.1810000e-02
   1.0750000e-02
   9.4900000e-03
  -1.9710000e-02
   3.7400000e-02
   1.7580000e-02
   2.0300000e-03
   5.1710000e-02
   1.5490000e-02
   2.3390000e-02
   2.0020000e-02
  -5.7850000e-02
  -2.5750000e-02
  -5.7470000e-02
  -7.2600000e-02
  -5.6500000e-03
  -1.3570000e-02
  -6.0300000e-03
   5.2200000e-02
   3.9650000e-02
   4.6230000e-02
   7.2820000e-02
   4.0000000e-03
  -1.5550000e-02
   7.5900000e-03
  -4.2360000e-02
   4.2770000e-02
   3.4030000e-02
  -1.0858000e-01
  -3.9100000e-02
  -3.1890000e-02
  -6.9590000e-02
   2.1000000e-02
   1.2280000e-02
   1.4000000e-04
   3.2410000e-02
  -1.6890000e-02
  -1.5850000e-02
   2.0480000e-02
  -4.5820000e-02
   2.9300000e-03
   5.6150000e-02
  -2.1220000e-02
  -3.6990000e-02
  -3.3200000e-02
  -3.2660000e-02
   4.8260000e-02
   6.5800000e-02
  -3.8800000e-02
  -1.7030000e-02
   2.2020000e-02
  -1.5160000e-02
  -5.4300000e-03
  -1.7500000e-03
  -2.0230000e-02
  -7.0500000e-03
  -1.4780000e-02
  -1.5490000e-02
  -4.3600000e-03
  -1.0400000e-03
   1.3240000e-02
   3.2100000e-03
   3.5530000e-02
   4.4170000e-02
  -4.0190000e-02
  -9.6800000e-03
   8.1130000e-02
   1.6150000e-02
  -3.4660000e-02
   1.4000000e-04
  -5.1440000e-02
  -6.0620000e-02
  -3.0600000e-02
  -3.6700000e-03
   1.0470000e-02
   7.6500000e-03
   9.2900000e-03
   9.1300000e-03
   2.8430000e-02
  -1.5900000e-02
  -2.8430000e-02
   5.5110000e-02
   1.1680000e-02
  -7.4220000e-02
  -3.6990000e-02
  -2.5830000e-02
   6.3100000e-03
   4.1070000e-02
   1.4280000e-02
   2.3910000e-02
  -3.7290000e-02
  -9.8570000e-02
  -8.4400000e-03
   4.1760000e-02
   1.0500000e-02
   1.6090000e-02
   2.2200000e-03
  -6.3120000e-02
  -5.0450000e-02
  -7.5100000e-03
   5.6510000e-02
   7.5100000e-02
   7.2900000e-03
  -1.0500000e-02
  -3.1970000e-02
  -7.1340000e-02
  -5.6540000e-02
  -6.1390000e-02
   3.1000000e-03
   6.9530000e-02
   3.9070000e-02
   5.1820000e-02
   7.8420000e-02
   2.3690000e-02
   1.0500000e-02
   2.0430000e-02
  -4.5050000e-02
  -2.7360000e-02
   4.4100000e-03
  -1.0310000e-02
   1.0640000e-02
  -3.2520000e-02
  -7.2800000e-02
  -4.7410000e-02
  -3.6930000e-02
   3.4740000e-02
   3.9260000e-02
   1.3820000e-02
   6.1530000e-02
   2.7830000e-02
  -2.4840000e-02
  -1.4120000e-02
  -4.0910000e-02
  -2.5940000e-02
   6.7200000e-03
  -1.2890000e-02
  -1.3200000e-03
  -1.0040000e-02
  -7.6060000e-02
  -8.5020000e-02
  -7.1450000e-02
  -4.4120000e-02
   4.8260000e-02
   6.9860000e-02
   3.4330000e-02
   1.8340000e-02
   3.1750000e-02
   1.8100000e-03
  -7.5650000e-02
  -3.3560000e-02
   1.4610000e-02
   7.7900000e-03
   6.6710000e-02
   5.2970000e-02
  -1.9880000e-02
   3.6000000e-04
  -4.7490000e-02
  -7.9160000e-02
   1.9710000e-02
   4.2200000e-03
   4.1900000e-03
   7.9290000e-02
  -2.3880000e-02
  -6.3360000e-02
   6.8300000e-03
  -1.5550000e-02
   4.9520000e-02
   8.6010000e-02
  -4.4100000e-03
   1.8900000e-03
  -4.4100000e-03
  -7.9100000e-02
  -9.2400000e-03
  -2.2000000e-04
  -5.9090000e-02
   4.3590000e-02
   4.3680000e-02
  -2.2480000e-02
  -7.6500000e-03
  -2.7580000e-02
  -1.1840000e-02
   4.1150000e-02
  -5.1300000e-03
  -2.4270000e-02
   6.5500000e-03
  -8.2800000e-03
   2.0230000e-02
   5.5990000e-02
  -4.8170000e-02
  -8.0800000e-02
  -1.8100000e-02
  -2.6160000e-02
   5.9800000e-03
   5.2200000e-02
   3.8600000e-02
   3.0350000e-02
   1.3570000e-02
  -1.7790000e-02
  -1.9520000e-02
  -2.3550000e-02
  -5.9580000e-02
  -1.0420000e-02
   5.3820000e-02
   6.1100000e-03
  -5.5490000e-02
  -7.6720000e-02
  -9.1030000e-02
  -5.5960000e-02
  -1.7140000e-02
   2.5200000e-03
   5.2780000e-02
   8.2610000e-02
   6.7280000e-02
   3.4930000e-02
   2.8240000e-02
  -2.0300000e-03
  -4.2000000e-02
  -1.9000000e-04
   4.0610000e-02
  -4.9100000e-03
  -3.5150000e-02
  -2.1800000e-02
  -5.2180000e-02
  -5.9880000e-02
  -3.1370000e-02
   3.8280000e-02
   8.9850000e-02
   7.5130000e-02
   4.3180000e-02
  -3.1610000e-02
  -1.0740000e-01
  -4.9740000e-02
  -3.2400000e-03
   3.7810000e-02
   8.3130000e-02
   1.3220000e-02
  -4.7460000e-02
  -4.0060000e-02
  -6.3010000e-02
  -2.6900000e-02
   3.4990000e-02
  -3.9100000e-02
  -3.4380000e-02
   2.1440000e-02
  -2.5120000e-02
  -8.7500000e-03
   4.1900000e-03
  -2.4100000e-03
   4.7300000e-02
   8.0420000e-02
   3.3810000e-02
  -3.9800000e-03
  -4.5160000e-02
  -7.1590000e-02
  -1.1000000e-03
   1.9710000e-02
  -2.7830000e-02
  -9.4900000e-03
  -8.3400000e-03
   2.9600000e-03
  -1.3400000e-03
  -3.8710000e-02
  -6.1250000e-02
  -6.2290000e-02
   5.7300000e-03
   9.8130000e-02
   9.2320000e-02
   7.4930000e-02
   4.3900000e-02
  -8.3900000e-03
   3.8100000e-03
  -3.1500000e-03
  -8.2640000e-02
  -8.5050000e-02
  -5.8430000e-02
  -4.2090000e-02
   2.2500000e-03
  -4.3300000e-03
  -3.2740000e-02
   1.2310000e-02
   5.4700000e-02
   3.5560000e-02
   2.5750000e-02
   3.0240000e-02
   1.6450000e-02
   2.9310000e-02
   5.8590000e-02
   4.5680000e-02
  -2.4980000e-02
  -3.2870000e-02
  -3.4140000e-02
  -4.7730000e-02
  -4.2880000e-02
  -1.0375000e-01
  -1.4156000e-01
  -4.0330000e-02
   5.1500000e-03
   1.4670000e-02
   4.2660000e-02
   4.0520000e-02
   8.1400000e-02
   1.3128000e-01
   3.7750000e-02
  -9.6980000e-02
  -1.3739000e-01
  -1.1417000e-01
  -2.1280000e-02
   7.3970000e-02
   6.5580000e-02
   1.4340000e-02
  -5.5440000e-02
  -1.1052000e-01
  -1.5080000e-02
   1.1790000e-02
   1.8320000e-02
   9.8950000e-02
   1.0797000e-01
   7.2800000e-02
  -4.8800000e-03
  -9.0890000e-02
  -7.2270000e-02
  -1.3130000e-02
  -1.3200000e-03
   7.7000000e-03
   1.3490000e-02
  -1.4610000e-02
  -9.9500000e-03
   8.2800000e-03
   3.2930000e-02
   6.0370000e-02
   2.3310000e-02
   1.6040000e-02
   4.1620000e-02
  -2.2700000e-02
  -2.3250000e-02
  -9.0800000e-03
  -4.3840000e-02
   3.5400000e-03
   3.4550000e-02
   5.6800000e-03
  -2.8080000e-02
  -6.3450000e-02
  -4.6170000e-02
  -2.1400000e-03
   2.6320000e-02
   2.9280000e-02
   3.3310000e-02
  -2.1100000e-03
  -1.2090000e-02
  -1.3410000e-02
  -6.0700000e-02
  -4.2280000e-02
  -3.0700000e-03
   3.0000000e-05
   1.9080000e-02
   9.0800000e-03
  -2.4460000e-02
   2.3030000e-02
   5.6340000e-02
   2.1550000e-02
  -1.3200000e-03
  -6.8740000e-02
  -1.1823000e-01
  -5.4920000e-02
  -2.7830000e-02
  -5.2000000e-04
   5.9420000e-02
   6.4710000e-02
   3.3290000e-02
   1.7110000e-02
  -2.4480000e-02
  -5.6870000e-02
  -3.1260000e-02
  -1.5000000e-02
   2.5990000e-02
   3.0490000e-02
  -3.9870000e-02
  -4.3840000e-02
  -3.4110000e-02
  -3.8220000e-02
  -3.7600000e-03
   2.2620000e-02
   4.8340000e-02
   7.5210000e-02
   7.3540000e-02
   6.9500000e-02
   4.4860000e-02
  -2.0480000e-02
  -3.8280000e-02
  -3.0410000e-02
  -4.4910000e-02
  -6.2810000e-02
  -4.0090000e-02
  -1.9200000e-03
   2.0810000e-02
   5.8430000e-02
   9.0730000e-02
   7.2930000e-02
   2.9940000e-02
  -1.7160000e-02
  -1.6940000e-02
  -5.9910000e-02
  -9.7330000e-02
  -7.8550000e-02
  -5.7220000e-02
   1.3130000e-02
   8.2800000e-03
  -3.9980000e-02
  -8.5500000e-03
   9.2100000e-03
  -1.9710000e-02
  -1.0780000e-02
   9.0000000e-04
   3.1720000e-02
   5.1520000e-02
   3.0820000e-02
   4.4530000e-02
   2.2210000e-02
  -3.9590000e-02
  -5.1000000e-02
  -4.6060000e-02
  -4.4880000e-02
   1.2860000e-02
  -1.8180000e-02
  -3.7590000e-02
   5.2120000e-02
   4.6720000e-02
   2.9970000e-02
   5.7990000e-02
  -2.3830000e-02
  -8.5430000e-02
  -5.5550000e-02
   9.9000000e-04
   7.9400000e-02
   9.1270000e-02
  -2.6900000e-03
   4.0110000e-02
  -3.8000000e-04
  -6.6870000e-02
  -4.2500000e-02
  -1.1708000e-01
  -1.2610000e-01
  -1.4720000e-02
   1.7000000e-03
   3.5920000e-02
   9.2400000e-02
   6.1360000e-02
   8.8000000e-03
   2.7560000e-02
  -4.0910000e-02
  -8.1540000e-02
  -6.1440000e-02
  -5.1110000e-02
   1.1160000e-02
   2.6710000e-02
   1.7800000e-03
   1.0230000e-02
   2.8620000e-02
   3.0520000e-02
   3.9540000e-02
   2.5170000e-02
  -1.8180000e-02
  -4.3380000e-02
  -3.1750000e-02
   2.1440000e-02
   2.7390000e-02
  -3.4440000e-02
  -5.2900000e-03
   3.9650000e-02
  -2.2650000e-02
  -4.5710000e-02
  -5.5990000e-02
  -5.8350000e-02
   2.5060000e-02
   8.6370000e-02
   7.6330000e-02
   5.6700000e-02
  -1.7470000e-02
  -1.0084000e-01
  -4.2580000e-02
  -1.7300000e-03
  -1.7220000e-02
   5.7300000e-03
  -4.6610000e-02
  -3.1040000e-02
   7.2000000e-02
   2.1930000e-02
   2.3200000e-02
   2.0370000e-02
  -7.0790000e-02
  -2.6840000e-02
   3.1500000e-03
   4.7200000e-03
   3.4440000e-02
   1.2120000e-02
   7.1290000e-02
   9.3740000e-02
  -4.5680000e-02
  -6.2460000e-02
  -4.8970000e-02
  -7.1560000e-02
   1.4070000e-02
   3.6660000e-02
  -2.4790000e-02
  -2.2000000e-04
  -6.1750000e-02
  -7.5700000e-02
   2.1690000e-02
   4.5800000e-03
  -1.0390000e-02
   4.0190000e-02
   1.2480000e-02
  -8.4200000e-03
   1.0530000e-02
  -2.5530000e-02
   1.7190000e-02
   4.0610000e-02
   5.5400000e-03
   5.3660000e-02
   6.7400000e-03
  -6.9780000e-02
  -4.2090000e-02
  -8.1840000e-02
  -7.7480000e-02
  -3.5260000e-02
  -2.7420000e-02
   5.6950000e-02
   1.0381000e-01
   4.7680000e-02
  -2.5800000e-03
  -6.0920000e-02
  -4.8720000e-02
   4.3540000e-02
   7.3670000e-02
   6.2650000e-02
   5.0890000e-02
  -2.1630000e-02
  -6.9120000e-02
  -4.4310000e-02
  -4.1260000e-02
  -5.2730000e-02
  -1.1160000e-02
   7.9200000e-03
   2.1520000e-02
   2.6490000e-02
  -6.5500000e-03
   2.7640000e-02
   3.2110000e-02
  -1.2530000e-02
   1.4480000e-02
   5.4000000e-03
  -3.0380000e-02
   1.5570000e-02
  -9.8400000e-03
  -6.3940000e-02
  -1.3050000e-02
   3.7600000e-03
  -1.5240000e-02
   3.4820000e-02
  -3.2900000e-03
  -2.1110000e-02
   1.7960000e-02
  -9.3500000e-03
   5.2900000e-03
   7.6200000e-03
  -3.6660000e-02
   7.3800000e-03
  -1.2910000e-02
  -3.1310000e-02
   3.4250000e-02
   2.2200000e-03
  -2.3990000e-02
  -2.1630000e-02
  -6.5230000e-02
   1.0690000e-02
   5.1300000e-02
  -2.6000000e-03
   3.9240000e-02
   5.1160000e-02
  -2.8950000e-02
  -2.8540000e-02
  -4.3570000e-02
  -5.7410000e-02
   1.5790000e-02
   7.8310000e-02
   1.0274000e-01
   3.6770000e-02
  -6.3390000e-02
  -9.3550000e-02
  -6.7590000e-02
  -4.8000000e-03
  -1.1410000e-02
   2.3470000e-02
   4.1590000e-02
  -2.2040000e-02
  -2.2460000e-02
  -3.6250000e-02
  -7.5760000e-02
  -3.6520000e-02
  -3.6930000e-02
  -1.6780000e-02
   4.1510000e-02
   1.4000000e-04
  -3.2900000e-02
   2.4700000e-02
   4.1180000e-02
   8.9000000e-02
   9.9560000e-02
   5.5550000e-02
   1.1900000e-02
  -6.2900000e-02
  -1.0167000e-01
  -7.1860000e-02
  -5.7000000e-02
  -2.5140000e-02
   1.1680000e-02
   4.8010000e-02
   9.4210000e-02
   3.0020000e-02
  -6.9940000e-02
  -2.8600000e-02
  -1.4800000e-03
  -1.1210000e-02
   4.3320000e-02
   5.5360000e-02
   3.1480000e-02
   1.6830000e-02
  -1.9580000e-02
  -3.1260000e-02
  -5.5850000e-02
  -8.7570000e-02
  -3.7540000e-02
   1.9740000e-02
  -1.0990000e-02
   3.2900000e-03
   3.0820000e-02
   1.8400000e-03
   4.5020000e-02
   2.2510000e-02
  -6.6380000e-02
   3.1170000e-02
   7.3320000e-02
   2.3800000e-02
   6.0840000e-02
   9.4600000e-03
  -1.0189000e-01
  -6.3990000e-02
  -7.8610000e-02
  -6.6190000e-02
   2.6870000e-02
   1.4610000e-02
   1.5130000e-02
   7.9760000e-02
   5.2000000e-04
  -7.7300000e-03
   2.4760000e-02
  -6.3280000e-02
  -7.7600000e-03
   2.7010000e-02
  -6.9860000e-02
   8.7500000e-03
   4.7700000e-03
  -9.3110000e-02
   6.3390000e-02
   5.9830000e-02
  -3.5780000e-02
   4.8480000e-02
  -4.6300000e-03
  -7.1230000e-02
  -1.6180000e-02
  -6.1360000e-02
  -4.8970000e-02
   2.6350000e-02
  -3.4330000e-02
   2.5010000e-02
   1.0060000e-01
   2.6490000e-02
   6.6270000e-02
   6.4760000e-02
  -5.9990000e-02
  -2.9750000e-02
  -3.5840000e-02
  -6.8410000e-02
   3.0570000e-02
   5.4800000e-03
  -4.4530000e-02
  -1.3190000e-02
  -7.3860000e-02
  -4.8090000e-02
  -1.0100000e-03
  -3.3200000e-02
   6.7200000e-02
   1.4373000e-01
   9.4950000e-02
   5.4100000e-02
   8.5800000e-03
  -6.4980000e-02
  -7.3810000e-02
  -7.7350000e-02
  -6.7500000e-02
  -5.0150000e-02
  -5.1550000e-02
  -2.4700000e-03
   1.1430000e-02
  -5.4800000e-03
   2.3170000e-02
   2.1580000e-02
   5.8510000e-02
   9.3850000e-02
   3.3590000e-02
   2.6840000e-02
   4.5400000e-02
  -1.2690000e-02
  -1.1790000e-02
   2.2950000e-02
   9.5700000e-03
  -7.4000000e-04
  -5.4290000e-02
  -1.2303000e-01
  -8.5600000e-02
  -9.3390000e-02
  -6.0370000e-02
   4.6720000e-02
   4.6280000e-02
   6.0350000e-02
   1.2771000e-01
   7.4190000e-02
  -1.8400000e-03
  -2.3000000e-02
  -6.0760000e-02
  -2.5220000e-02
   2.3910000e-02
  -1.9820000e-02
   3.1750000e-02
   4.8280000e-02
  -3.7840000e-02
  -5.5990000e-02
  -6.2020000e-02
  -5.9940000e-02
   5.3700000e-03
   3.1390000e-02
  -1.2090000e-02
  -7.2400000e-03
  -2.1770000e-02
  -5.2560000e-02
   1.7250000e-02
   3.2820000e-02
   1.1600000e-02
   6.9150000e-02
   1.6510000e-02
  -6.1280000e-02
  -1.2340000e-02
  -1.5930000e-02
  -5.2040000e-02
  -1.8100000e-02
  -2.2840000e-02
  -4.7760000e-02
  -1.8510000e-02
   1.2310000e-02
   8.6400000e-03
  -1.4970000e-02
  -2.8900000e-02
   1.9520000e-02
   7.6800000e-02
   2.4290000e-02
  -1.0400000e-03
   9.7600000e-03
  -3.5900000e-03
   8.3900000e-03
  -1.8400000e-03
   1.6830000e-02
   2.5500000e-02
  -6.1400000e-03
   2.8130000e-02
   6.6350000e-02
   4.9600000e-03
  -6.3880000e-02
  -5.4950000e-02
  -6.2620000e-02
  -7.2330000e-02
  -2.0870000e-02
   1.6120000e-02
   4.8040000e-02
   4.0190000e-02
   6.2000000e-03
   1.8590000e-02
  -2.9830000e-02
  -4.5540000e-02
   6.6960000e-02
   1.0803000e-01
   5.9610000e-02
   3.7950000e-02
  -2.9830000e-02
  -9.3550000e-02
  -5.9000000e-02
  -8.3570000e-02
  -7.4710000e-02
   7.0680000e-02
   5.2230000e-02
  -1.8210000e-02
   2.2100000e-02
  -3.3400000e-02
  -4.8890000e-02
   5.0200000e-02
   1.1100000e-02
   1.8920000e-02
   5.6840000e-02
   1.8810000e-02
   6.0050000e-02
   5.9960000e-02
  -3.8080000e-02
  -1.7930000e-02
   2.1610000e-02
  -4.0740000e-02
  -6.3420000e-02
  -1.0370000e-01
  -1.6722000e-01
  -1.5080000e-01
  -8.0310000e-02
  -1.7680000e-02
   7.4030000e-02
   9.5910000e-02
   9.9060000e-02
   1.1782000e-01
   9.8430000e-02
   5.3990000e-02
  -3.3480000e-02
  -5.2940000e-02
  -3.3370000e-02
  -2.3940000e-02
   3.0930000e-02
   1.7710000e-02
  -6.3640000e-02
  -6.5560000e-02
  -5.6400000e-02
  -7.9870000e-02
  -1.1160000e-02
   6.0000000e-03
   2.2000000e-04
   7.3040000e-02
   8.5410000e-02
   7.7570000e-02
   6.5260000e-02
   3.8390000e-02
   2.4870000e-02
  -1.3050000e-02
  -1.9410000e-02
   2.9010000e-02
  -2.5660000e-02
  -4.9460000e-02
  -5.5630000e-02
  -8.8290000e-02
  -6.0180000e-02
  -6.1220000e-02
  -1.0296000e-01
   1.2860000e-02
   5.4040000e-02
  -3.9760000e-02
   2.0180000e-02
   8.0990000e-02
   5.5660000e-02
   8.2910000e-02
   6.6130000e-02
   3.7840000e-02
   9.0200000e-03
  -7.9680000e-02
  -6.9890000e-02
  -1.3630000e-02
  -6.7640000e-02
  -4.1980000e-02
   3.9670000e-02
   5.1960000e-02
   4.9680000e-02
  -3.1560000e-02
  -1.0287000e-01
  -3.6220000e-02
  -3.5120000e-02
   7.3800000e-03
   1.3610000e-01
   1.1502000e-01
   7.4190000e-02
   3.3830000e-02
  -6.8850000e-02
  -5.9720000e-02
  -6.3470000e-02
  -1.2297000e-01
   2.5250000e-02
   5.8320000e-02
  -7.0490000e-02
  -3.3290000e-02
  -5.7550000e-02
  -7.0820000e-02
   3.1610000e-02
  -1.6400000e-02
   4.9080000e-02
   8.9270000e-02
  -2.2840000e-02
   4.8310000e-02
   1.0625000e-01
   2.8680000e-02
   3.0350000e-02
  -1.9960000e-02
  -2.5140000e-02
   2.3550000e-02
  -5.7630000e-02
  -6.4380000e-02
  -5.1850000e-02
  -8.5000000e-02
  -9.4780000e-02
  -5.9580000e-02
   1.5710000e-02
   4.2280000e-02
   7.1970000e-02
   6.7670000e-02
   4.9000000e-02
   2.1440000e-02
  -1.0750000e-02
  -3.1890000e-02
   2.8200000e-03
   2.1820000e-02
  -1.3270000e-02
  -2.0870000e-02
  -6.3880000e-02
  -9.9360000e-02
  -8.7550000e-02
  -6.0840000e-02
  -1.2940000e-02
   1.0830000e-02
   2.7500000e-02
   6.8930000e-02
   7.7620000e-02
   4.7870000e-02
   6.6870000e-02
   7.8390000e-02
   1.5550000e-02
   7.6200000e-03
   1.4610000e-02
  -1.7580000e-02
  -1.5980000e-02
  -6.4020000e-02
  -9.5060000e-02
  -6.7670000e-02
  -5.8180000e-02
  -3.8060000e-02
   2.7140000e-02
   4.4250000e-02
   7.3210000e-02
   5.9690000e-02
   4.0330000e-02
   6.3750000e-02
  -8.2000000e-04
  -3.7120000e-02
   1.1210000e-02
  -3.2790000e-02
  -3.2520000e-02
   7.1800000e-03
  -2.6870000e-02
  -5.3250000e-02
  -7.0820000e-02
  -1.1162000e-01
  -3.0630000e-02
   2.4460000e-02
   3.8630000e-02
   8.6180000e-02
   4.6560000e-02
  -2.5420000e-02
   4.4100000e-03
   2.9750000e-02
   2.0320000e-02
  -4.2200000e-03
  -2.8820000e-02
   1.4810000e-02
   8.4200000e-03
  -4.0470000e-02
  -4.1980000e-02
  -8.4170000e-02
  -1.1524000e-01
  -5.1740000e-02
   7.6800000e-03
   2.2920000e-02
   6.4430000e-02
   9.0480000e-02
   5.6840000e-02
   3.5860000e-02
   1.8150000e-02
  -3.8820000e-02
  -1.9140000e-02
  -1.6310000e-02
  -3.3560000e-02
   7.6200000e-03
  -1.0090000e-02
  -7.3840000e-02
  -5.2700000e-02
  -3.3640000e-02
   3.4850000e-02
   9.5630000e-02
   5.1190000e-02
   1.1270000e-02
  -2.2870000e-02
  -6.0020000e-02
  -2.8130000e-02
  -2.1410000e-02
  -8.7200000e-03
   8.5110000e-02
   5.2510000e-02
  -4.1700000e-03
   1.9690000e-02
  -2.7660000e-02
  -1.9000000e-02
   1.4230000e-02
  -7.6690000e-02
  -4.6580000e-02
   2.5800000e-02
  -3.9870000e-02
   2.7230000e-02
   5.2310000e-02
  -6.7910000e-02
  -1.8340000e-02
   2.3600000e-03
  -2.5200000e-02
   6.7910000e-02
   2.1880000e-02
  -1.7140000e-02
   7.0410000e-02
   2.6600000e-03
  -2.9100000e-03
   5.7280000e-02
  -3.3090000e-02
  -3.8140000e-02
  -3.8900000e-03
  -1.0770000e-01
  -1.0323000e-01
  -3.1260000e-02
  -6.8960000e-02
  -4.1350000e-02
   6.6110000e-02
   6.8240000e-02
   8.2690000e-02
   8.0500000e-02
  -1.6500000e-03
  -1.5110000e-02
  -2.3830000e-02
  -3.6220000e-02
   3.7840000e-02
   2.9090000e-02
  -4.1870000e-02
  -5.1880000e-02
  -9.4320000e-02
  -1.0997000e-01
  -4.2940000e-02
  -1.7110000e-02
   5.7660000e-02
   1.4038000e-01
   1.0062000e-01
   7.4110000e-02
   2.7250000e-02
  -4.6910000e-02
  -2.1720000e-02
   2.0560000e-02
   6.8300000e-03
  -3.8400000e-03
  -5.0670000e-02
  -6.1750000e-02
  -2.9150000e-02
  -7.2850000e-02
  -6.2320000e-02
   1.0310000e-02
  -4.5650000e-02
  -1.9500000e-03
   6.9150000e-02
  -1.3400000e-03
   3.7000000e-03
   9.1600000e-03
  -2.5910000e-02
   4.1070000e-02
   4.8640000e-02
  -1.7360000e-02
   2.7970000e-02
   2.2260000e-02
  -3.0410000e-02
   1.9550000e-02
  -4.7350000e-02
  -7.8170000e-02
   7.8700000e-03
  -1.4040000e-02
  -1.2150000e-02
   5.4600000e-03
  -7.9590000e-02
  -3.1830000e-02
   2.9360000e-02
   2.2130000e-02
   9.3410000e-02
   8.6720000e-02
   3.0020000e-02
   5.1030000e-02
   3.9950000e-02
  -2.3200000e-02
  -5.9740000e-02
  -6.9670000e-02
  -3.6000000e-02
  -1.5740000e-02
  -1.9850000e-02
  -2.9690000e-02
  -5.0450000e-02
  -7.1150000e-02
  -4.4720000e-02
   1.4530000e-02
   1.9820000e-02
   1.8290000e-02
   8.3240000e-02
   9.9910000e-02
   6.6320000e-02
   2.5420000e-02
   1.3080000e-02
  -1.1490000e-02
  -6.6740000e-02
  -7.9650000e-02
  -7.2110000e-02
  -4.3320000e-02
  -3.6050000e-02
  -3.1280000e-02
  -6.1700000e-03
   9.6800000e-03
   1.4830000e-02
   3.4000000e-03
   2.6620000e-02
   4.2830000e-02
   3.3000000e-04
   5.2730000e-02
   8.7930000e-02
  -2.7000000e-04
  -2.9300000e-03
   0.0000000e+00
  -8.2560000e-02
  -6.2160000e-02
  -6.3660000e-02
  -5.3680000e-02
  -2.3500000e-02
  -5.4510000e-02
  -9.9990000e-02
  -6.2980000e-02
   1.2500000e-02
   4.4720000e-02
   1.0123000e-01
   1.0317000e-01
   1.9910000e-02
   5.3500000e-03
   1.0140000e-02
   2.4700000e-02
   3.3700000e-02
   9.7300000e-03
   3.0320000e-02
   3.1590000e-02
  -6.8050000e-02
  -1.2744000e-01
  -1.1765000e-01
  -9.2320000e-02
  -5.0700000e-02
  -1.3400000e-03
   2.8620000e-02
   1.9490000e-02
   9.1300000e-03
   4.0110000e-02
   8.3820000e-02
   5.3580000e-02
   6.1990000e-02
   5.8510000e-02
   4.0220000e-02
   6.6900000e-03
  -5.6070000e-02
  -5.1880000e-02
  -2.9500000e-02
  -1.4200000e-02
  -1.2370000e-02
  -5.8240000e-02
  -9.0100000e-02
  -3.9810000e-02
  -6.1220000e-02
  -7.2300000e-02
   4.4800000e-02
   6.3580000e-02
   7.2710000e-02
   1.4356000e-01
   8.3840000e-02
   9.6800000e-03
   1.4150000e-02
  -2.4070000e-02
  -7.7650000e-02
  -4.9900000e-02
  -7.6220000e-02
  -4.7050000e-02
   2.1690000e-02
  -1.5030000e-02
  -3.8520000e-02
  -3.7730000e-02
  -5.1240000e-02
  -4.6100000e-03
  -6.3900000e-03
   1.7160000e-02
   6.7150000e-02
   3.1780000e-02
   9.1600000e-03
   4.8060000e-02
   3.3530000e-02
   2.1900000e-03
  -1.1800000e-03
  -6.0920000e-02
  -4.2310000e-02
  -1.3400000e-03
  -4.6970000e-02
  -1.9630000e-02
   8.0000000e-05
  -4.4660000e-02
  -1.3980000e-02
  -3.2460000e-02
  -6.8790000e-02
  -3.8100000e-03
   5.5060000e-02
   6.9480000e-02
   7.3210000e-02
   2.1910000e-02
  -2.1410000e-02
   2.9100000e-03
   3.0270000e-02
   5.4180000e-02
  -8.8800000e-03
  -8.8530000e-02
  -8.2120000e-02
  -6.9610000e-02
  -7.0520000e-02
  -3.6250000e-02
  -3.0740000e-02
  -1.7190000e-02
   2.4100000e-02
   6.6600000e-02
   5.8760000e-02
   6.4760000e-02
   5.3030000e-02
   2.4240000e-02
   4.4140000e-02
   5.7600000e-03
  -3.7670000e-02
  -1.6070000e-02
  -4.6750000e-02
  -5.0370000e-02
  -2.0150000e-02
  -6.5340000e-02
  -5.2090000e-02
   1.0670000e-02
   5.9200000e-03
   2.6430000e-02
   4.3590000e-02
  -2.0290000e-02
  -1.2580000e-02
   3.9760000e-02
   1.9660000e-02
  -2.3110000e-02
  -3.4140000e-02
  -3.1280000e-02
  -5.2900000e-03
   2.4650000e-02
   1.1210000e-02
  -6.4160000e-02
  -5.2180000e-02
  -1.4720000e-02
  -4.4230000e-02
  -1.2690000e-02
   3.2300000e-02
   5.7600000e-03
   3.8360000e-02
   4.5130000e-02
  -7.7300000e-03
  -2.2650000e-02
  -5.7410000e-02
  -6.5830000e-02
   8.1400000e-03
   6.5860000e-02
   7.0220000e-02
   1.8640000e-02
  -4.1900000e-03
   7.4900000e-03
  -1.8560000e-02
  -1.2260000e-02
  -5.6200000e-03
  -4.6800000e-02
  -1.0580000e-02
  -4.9600000e-03
  -2.8840000e-02
  -3.1810000e-02
  -8.0800000e-02
  -7.4110000e-02
   4.2500000e-02
   6.7590000e-02
   2.7140000e-02
   3.3290000e-02
  -1.5600000e-02
  -5.8100000e-03
   3.1370000e-02
   1.4810000e-02
   4.9460000e-02
   8.6900000e-03
  -9.4290000e-02
  -5.5140000e-02
  -5.9960000e-02
  -1.1370000e-01
  -5.2970000e-02
   2.7660000e-02
   8.9990000e-02
   9.5030000e-02
   2.7970000e-02
  -1.4780000e-02
  -2.7830000e-02
  -3.0540000e-02
  -2.7400000e-03
   9.1900000e-03
   4.8500000e-03
   3.8800000e-02
   5.0700000e-03
  -7.9270000e-02
  -6.5360000e-02
  -4.1590000e-02
  -2.0670000e-02
   6.1960000e-02
   2.9360000e-02
  -3.3720000e-02
   2.3580000e-02
   6.5000000e-03
  -2.5770000e-02
   4.1700000e-03
  -2.9340000e-02
  -4.8860000e-02
   2.8730000e-02
  -4.1400000e-03
  -3.3290000e-02
   1.9700000e-03
   2.0560000e-02
   4.1100000e-02
   1.0200000e-02
   2.7800000e-02
   1.7490000e-02
  -4.8200000e-02
  -1.4610000e-02
  -8.0000000e-04
  -3.2240000e-02
   1.1210000e-02
  -5.7600000e-03
  -1.4500000e-02
   2.7120000e-02
  -3.1610000e-02
  -1.4700000e-02
   3.8550000e-02
  -1.6670000e-02
  -6.7700000e-03
   3.1800000e-03
  -4.6250000e-02
   2.7060000e-02
   4.2500000e-02
  -2.9610000e-02
   2.5310000e-02
  -3.3420000e-02
  -9.9420000e-02
  -2.9670000e-02
  -5.4010000e-02
  -4.8500000e-02
   5.4530000e-02
   3.8170000e-02
   2.8000000e-03
   3.7210000e-02
  -4.7000000e-04
  -3.6190000e-02
  -1.1460000e-02
  -2.1550000e-02
  -2.3550000e-02
  -3.1560000e-02
  -1.0800000e-02
   4.6170000e-02
  -8.5000000e-03
  -2.4130000e-02
   3.1830000e-02
   2.3770000e-02
   1.3650000e-02
  -1.3430000e-02
  -5.6430000e-02
   3.8900000e-03
  -1.5300000e-02
  -6.6410000e-02
   5.4780000e-02
   3.1810000e-02
  -3.0160000e-02
   2.4540000e-02
  -1.0280000e-02
  -6.3300000e-03
   3.9240000e-02
  -3.3450000e-02
  -6.9100000e-03
   6.5500000e-02
  -3.2270000e-02
  -1.2300000e-03
   2.9780000e-02
  -6.4980000e-02
   3.7670000e-02
   6.8550000e-02
  -1.7270000e-02
   2.3610000e-02
  -4.9220000e-02
  -9.7420000e-02
   4.4970000e-02
   3.7180000e-02
  -1.1760000e-02
  -7.7000000e-04
  -7.8000000e-02
  -4.5650000e-02
  -2.2840000e-02
  -4.9960000e-02
   2.8680000e-02
   5.9360000e-02
   1.6560000e-02
   5.5580000e-02
   2.1630000e-02
  -5.9630000e-02
  -2.6730000e-02
  -3.1810000e-02
  -6.2920000e-02
  -4.1070000e-02
  -3.4520000e-02
  -1.9580000e-02
   4.1680000e-02
   2.9890000e-02
   5.7900000e-03
   4.2580000e-02
   8.8000000e-03
  -1.9960000e-02
   2.9450000e-02
   3.1040000e-02
   8.5500000e-03
  -3.4270000e-02
  -4.6470000e-02
  -1.4450000e-02
  -1.9060000e-02
  -1.6670000e-02
  -7.9200000e-03
  -3.0870000e-02
  -4.9020000e-02
  -3.2330000e-02
  -3.6410000e-02
  -1.9490000e-02
   4.1040000e-02
   3.7340000e-02
   3.2350000e-02
   1.7110000e-02
  -2.6920000e-02
  -2.1030000e-02
   2.2670000e-02
   5.3960000e-02
   7.2190000e-02
   1.0140000e-02
  -3.4660000e-02
  -1.8600000e-03
  -1.4640000e-02
  -5.8700000e-03
  -1.1540000e-02
  -3.8520000e-02
  -1.8920000e-02
  -3.9760000e-02
  -3.5200000e-02
  -1.2720000e-02
  -3.2380000e-02
  -6.4700000e-03
   4.6750000e-02
   1.3520000e-02
  -7.5100000e-03
  -2.9200000e-02
  -3.2130000e-02
   6.2490000e-02
   6.6820000e-02
  -4.7400000e-03
   2.8950000e-02
   2.6160000e-02
  -6.4540000e-02
  -6.7170000e-02
  -5.5690000e-02
  -9.0640000e-02
  -4.6360000e-02
  -3.8100000e-03
   2.5310000e-02
   8.4150000e-02
   2.2400000e-02
  -3.2630000e-02
   1.4120000e-02
   4.4000000e-04
  -4.9900000e-03
   7.2140000e-02
   6.3310000e-02
   1.2910000e-02
  -1.3710000e-02
  -9.2040000e-02
  -7.4220000e-02
  -2.1960000e-02
  -3.0570000e-02
   3.4380000e-02
   2.6730000e-02
  -7.6250000e-02
  -4.1210000e-02
  -2.1800000e-02
  -2.3990000e-02
   5.8890000e-02
   5.0500000e-02
   4.1320000e-02
   5.8430000e-02
  -1.3270000e-02
  -1.4720000e-02
  -9.3000000e-04
  -1.0530000e-02
   1.2560000e-02
   1.8530000e-02
   2.7310000e-02
   1.8730000e-02
  -5.7610000e-02
  -7.6990000e-02
  -3.2630000e-02
  -4.4170000e-02
  -6.0900000e-02
  -1.4590000e-02
   1.2640000e-02
   3.5120000e-02
   3.3640000e-02
   9.3500000e-03
   1.3160000e-02
   8.9700000e-03
   1.2010000e-02
   2.0180000e-02
  -1.4920000e-02
  -5.8780000e-02
  -3.8250000e-02
  -2.4050000e-02
  -2.8710000e-02
  -8.0000000e-05
  -2.4480000e-02
  -5.4340000e-02
   7.4000000e-04
  -4.5800000e-03
  -4.9600000e-03
   2.2840000e-02
   2.6680000e-02
   5.3490000e-02
   6.3230000e-02
   7.9800000e-03
  -1.2500000e-02
  -4.5080000e-02
  -5.3360000e-02
   6.9000000e-04
   1.6370000e-02
  -4.8560000e-02
  -3.9040000e-02
  -2.0020000e-02
  -1.9740000e-02
  -1.2750000e-02
  -2.8410000e-02
   3.9370000e-02
   1.0062000e-01
   5.1380000e-02
   2.8950000e-02
   1.7440000e-02
  -4.8890000e-02
  -8.4280000e-02
  -5.1460000e-02
  -2.0870000e-02
  -3.1800000e-03
   1.6920000e-02
   5.0000000e-05
  -3.2740000e-02
  -2.2500000e-03
   1.7160000e-02
   2.3800000e-02
   6.9940000e-02
   2.2100000e-02
  -5.7720000e-02
  -3.7480000e-02
  -6.1610000e-02
  -6.1330000e-02
   3.0430000e-02
   2.3830000e-02
   3.7730000e-02
   6.7940000e-02
   5.8400000e-03
  -2.5720000e-02
  -1.5740000e-02
  -3.4110000e-02
   2.4400000e-03
   2.4570000e-02
  -4.7380000e-02
  -4.0580000e-02
  -7.1800000e-03
  -7.1640000e-02
  -2.5420000e-02
   2.8350000e-02
  -3.6690000e-02
  -1.5660000e-02
   1.8320000e-02
  -6.1330000e-02
   1.2690000e-02
   8.5240000e-02
   4.4690000e-02
   6.0760000e-02
   2.2040000e-02
  -1.0381000e-01
  -4.4610000e-02
  -3.3200000e-03
  -9.4210000e-02
  -6.3720000e-02
  -2.8460000e-02
  -2.3940000e-02
   4.6580000e-02
   1.6260000e-02
  -8.2800000e-03
   5.8570000e-02
   2.4370000e-02
   1.6920000e-02
   5.4530000e-02
   5.4010000e-02
   4.6910000e-02
  -6.6600000e-03
  -4.3490000e-02
  -2.3850000e-02
  -3.5450000e-02
  -8.9550000e-02
  -8.1930000e-02
  -4.3380000e-02
  -5.1300000e-03
  -1.0780000e-02
   2.9340000e-02
   8.4640000e-02
   4.5190000e-02
   4.0000000e-03
   3.9620000e-02
   1.4780000e-02
  -5.8670000e-02
  -3.6850000e-02
  -3.9130000e-02
  -1.3130000e-02
   4.4250000e-02
  -6.7400000e-03
  -2.4100000e-02
   1.7770000e-02
  -2.9260000e-02
  -5.1460000e-02
   2.4130000e-02
  -8.7500000e-03
  -7.1700000e-02
  -3.3500000e-03
   9.4900000e-03
   2.3220000e-02
   1.0265000e-01
   9.9500000e-03
  -2.9530000e-02
  -7.0200000e-03
  -1.1581000e-01
  -4.7930000e-02
   3.2520000e-02
  -7.0380000e-02
  -3.9480000e-02
   4.3300000e-03
  -6.4200000e-03
   3.4440000e-02
   1.5660000e-02
  -2.1190000e-02
   5.4070000e-02
   6.5500000e-03
  -4.8780000e-02
   3.0820000e-02
  -1.6000000e-04
   1.2340000e-02
   5.2860000e-02
  -1.3050000e-02
   9.2100000e-03
   2.6000000e-03
  -6.0840000e-02
   2.0100000e-02
   6.3300000e-03
  -2.5770000e-02
   4.7410000e-02
  -6.4700000e-03
   1.1050000e-02
   4.5400000e-02
  -1.0123000e-01
  -6.5260000e-02
  -1.2010000e-02
  -1.1814000e-01
  -1.6500000e-03
   7.4800000e-02
  -6.1400000e-03
   2.8380000e-02
   1.9300000e-02
  -1.7470000e-02
   3.1800000e-03
  -7.0710000e-02
  -1.0348000e-01
   9.5700000e-03
   2.4680000e-02
   2.5170000e-02
   5.6400000e-02
   2.9100000e-03
  -2.3250000e-02
   6.2000000e-03
  -1.9140000e-02
  -1.8010000e-02
  -4.5430000e-02
  -6.9370000e-02
   4.1900000e-03
   2.6160000e-02
   1.3490000e-02
   3.8850000e-02
   8.2640000e-02
   5.6560000e-02
   3.7290000e-02
   2.4870000e-02
  -3.9920000e-02
  -8.5680000e-02
  -1.0745000e-01
  -8.5490000e-02
  -1.7000000e-03
   1.2230000e-02
  -2.2400000e-02
  -1.8730000e-02
  -3.7210000e-02
  -1.9080000e-02
   3.1560000e-02
   1.9820000e-02
   4.4550000e-02
   5.1570000e-02
  -7.7000000e-03
   8.3100000e-03
   2.0670000e-02
  -1.8860000e-02
   4.1700000e-02
   7.9380000e-02
   6.1440000e-02
   4.2690000e-02
  -8.0940000e-02
  -1.2878000e-01
  -7.4390000e-02
  -1.0490000e-01
  -5.2890000e-02
   5.9470000e-02
   3.2790000e-02
   3.9890000e-02
   2.9120000e-02
  -2.9970000e-02
   1.6730000e-02
   3.4250000e-02
  -3.0190000e-02
   4.4060000e-02
   2.1660000e-02
  -8.6260000e-02
  -1.6290000e-02
  -4.9020000e-02
  -1.1804000e-01
  -2.7280000e-02
  -5.4120000e-02
  -2.2650000e-02
   4.5760000e-02
  -2.6210000e-02
   9.0000000e-04
   5.6370000e-02
  -5.2600000e-03
   2.0450000e-02
   3.2570000e-02
  -1.4280000e-02
   3.7430000e-02
   1.0340000e-02
  -5.4860000e-02
   3.2960000e-02
   3.0300000e-02
  -2.3660000e-02
   2.2510000e-02
  -1.3930000e-02
  -3.8080000e-02
  -1.4340000e-02
  -6.8380000e-02
  -3.0900000e-02
   7.9500000e-03
  -3.3720000e-02
   2.9200000e-02
   7.4930000e-02
   2.2070000e-02
   3.2870000e-02
   5.2480000e-02
   1.1570000e-02
  -7.0500000e-03
  -3.5920000e-02
  -9.9090000e-02
  -7.3700000e-02
  -1.5050000e-02
  -1.5900000e-03
   4.2800000e-03
   1.2900000e-03
  -4.4500000e-02
  -3.5100000e-02
   9.5700000e-03
   9.6800000e-03
   3.6900000e-02
   6.0650000e-02
   5.3600000e-02
   5.2860000e-02
   1.1050000e-02
  -4.8170000e-02
  -5.6040000e-02
  -6.6430000e-02
  -4.7570000e-02
  -1.5820000e-02
   3.0320000e-02
   4.4200000e-02
  -1.8780000e-02
  -3.3450000e-02
  -2.3610000e-02
  -5.7250000e-02
  -4.1260000e-02
   1.5000000e-02
   2.5500000e-02
   7.4300000e-03
  -4.4700000e-03
  -1.0280000e-02
   9.0500000e-03
   2.0870000e-02
   6.3940000e-02
   1.0260000e-01
   1.7440000e-02
  -6.0950000e-02
  -8.8070000e-02
  -4.1260000e-02
   1.4780000e-02
  -3.3370000e-02
  -1.3160000e-02
   1.4310000e-02
  -6.5890000e-02
  -5.2970000e-02
   1.7440000e-02
  -1.5600000e-03
   3.4140000e-02
   5.7550000e-02
   4.7710000e-02
   8.1650000e-02
   4.2200000e-02
  -3.4800000e-03
   3.0980000e-02
  -9.8200000e-03
  -7.3450000e-02
  -8.3380000e-02
  -9.8730000e-02
  -7.8910000e-02
  -4.6450000e-02
  -3.7670000e-02
  -1.7410000e-02
   7.5900000e-03
   4.0300000e-03
  -3.0110000e-02
   2.5990000e-02
   9.5060000e-02
   9.3930000e-02
   6.7720000e-02
   3.5780000e-02
   4.0300000e-03
  -3.5010000e-02
  -4.8370000e-02
  -6.4350000e-02
  -8.6340000e-02
  -4.4280000e-02
  -4.7730000e-02
  -7.4250000e-02
  -7.2900000e-03
   1.8920000e-02
  -2.1360000e-02
   3.7340000e-02
   6.3450000e-02
   2.3630000e-02
   6.3860000e-02
   5.9940000e-02
  -7.6610000e-02
  -2.6900000e-02
  -5.1500000e-03
  -5.7520000e-02
   4.1150000e-02
   6.2290000e-02
   3.8440000e-02
   8.8230000e-02
  -3.4500000e-03
  -1.3281000e-01
  -9.4480000e-02
  -8.9710000e-02
  -5.9030000e-02
   1.1694000e-01
   1.1565000e-01
   3.0270000e-02
   2.5200000e-02
  -3.9400000e-02
  -4.7320000e-02
   2.0870000e-02
   3.9200000e-03
   4.2440000e-02
   7.7040000e-02
   4.6600000e-03
  -7.1620000e-02
  -6.5560000e-02
  -6.3530000e-02
  -4.3160000e-02
  -2.7360000e-02
   1.2890000e-02
  -3.1590000e-02
  -3.8580000e-02
   2.7100000e-03
  -3.9890000e-02
  -4.1900000e-03
   3.9510000e-02
   2.6730000e-02
   3.1670000e-02
   4.3380000e-02
   6.3000000e-04
  -1.4230000e-02
  -2.1170000e-02
  -5.2810000e-02
  -3.2660000e-02
  -3.7000000e-03
   2.9690000e-02
   5.4560000e-02
  -8.7700000e-03
  -6.3660000e-02
  -4.2140000e-02
  -5.8510000e-02
  -2.1000000e-02
   2.6240000e-02
   4.5190000e-02
   3.2460000e-02
   3.1000000e-03
  -2.4370000e-02
  -4.0940000e-02
  -1.7360000e-02
  -8.2300000e-03
  -1.2800000e-02
   5.6890000e-02
   3.9150000e-02
  -2.6950000e-02
   5.5930000e-02
   7.0490000e-02
  -7.6850000e-02
  -7.3510000e-02
  -3.7620000e-02
  -5.9630000e-02
   4.0900000e-03
   1.6560000e-02
  -1.0860000e-02
   5.0780000e-02
   4.5080000e-02
  -3.4800000e-03
   4.0960000e-02
   6.0680000e-02
  -1.5240000e-02
  -2.7720000e-02
  -3.0110000e-02
  -4.7760000e-02
  -1.1820000e-02
   2.0540000e-02
   1.3380000e-02
   1.5790000e-02
  -8.5500000e-03
  -8.1290000e-02
  -3.9180000e-02
  -7.4000000e-04
  -7.3230000e-02
  -3.4160000e-02
   3.7480000e-02
   3.4550000e-02
   5.5190000e-02
   4.8500000e-02
  -2.0700000e-02
  -6.3970000e-02
  -8.0580000e-02
  -3.8500000e-02
   5.5690000e-02
   7.9540000e-02
   2.3200000e-02
  -1.0940000e-02
  -1.2170000e-02
  -7.3950000e-02
  -5.3600000e-02
   1.5400000e-03
  -5.1270000e-02
  -9.7600000e-03
   4.7210000e-02
  -1.7710000e-02
   2.4320000e-02
   3.8770000e-02
   8.5000000e-04
   5.4450000e-02
   2.2240000e-02
  -4.5270000e-02
  -2.2130000e-02
  -5.9500000e-03
  -3.9130000e-02
  -2.2840000e-02
   1.6510000e-02
   3.2300000e-02
   3.7180000e-02
   2.3110000e-02
   2.5200000e-03
  -3.3090000e-02
  -6.7890000e-02
  -2.8760000e-02
   5.2070000e-02
   5.8350000e-02
   8.3600000e-03
   6.5300000e-03
  -4.9900000e-03
  -1.8070000e-02
  -1.5440000e-02
  -5.0120000e-02
  -5.7960000e-02
  -4.6010000e-02
  -5.2420000e-02
  -5.8400000e-03
   3.3810000e-02
   7.3500000e-03
  -1.0990000e-02
  -1.1240000e-02
  -2.2460000e-02
   1.3740000e-02
   2.0120000e-02
   2.2350000e-02
   6.2320000e-02
   7.8830000e-02
   5.5190000e-02
   3.2110000e-02
  -8.0100000e-03
  -7.0520000e-02
  -9.6270000e-02
  -3.9430000e-02
  -3.0570000e-02
  -3.7340000e-02
  -1.8900000e-03
   2.0450000e-02
   1.2600000e-03
   1.3080000e-02
  -2.9750000e-02
  -6.5200000e-02
   2.1520000e-02
   8.0250000e-02
   4.5240000e-02
   2.2210000e-02
  -1.5520000e-02
  -3.7590000e-02
   2.5550000e-02
   5.3110000e-02
  -8.2300000e-03
  -5.0830000e-02
  -6.7720000e-02
  -9.1880000e-02
  -6.6190000e-02
  -1.7110000e-02
  -5.2900000e-03
   1.5110000e-02
   7.6470000e-02
   8.9140000e-02
   2.5420000e-02
  -2.8300000e-02
  -3.0320000e-02
  -4.3380000e-02
   3.3310000e-02
   9.4210000e-02
   4.2200000e-02
   2.5500000e-02
  -3.9240000e-02
  -1.1688000e-01
  -7.0740000e-02
  -5.0700000e-02
  -5.3790000e-02
   2.1360000e-02
   3.5260000e-02
   1.9600000e-02
   1.1460000e-02
  -4.0610000e-02
   5.8700000e-03
   2.1610000e-02
  -2.1060000e-02
   3.8520000e-02
   5.2600000e-03
  -4.6750000e-02
  -1.7770000e-02
  -2.4540000e-02
   2.3800000e-02
   2.9150000e-02
  -3.3090000e-02
  -3.8630000e-02
  -3.9240000e-02
  -3.1200000e-02
   7.7000000e-04
   3.9950000e-02
   4.8780000e-02
   3.4250000e-02
   5.4860000e-02
   5.2730000e-02
   4.0690000e-02
   3.1500000e-02
  -3.6000000e-02
  -7.7760000e-02
  -6.1220000e-02
  -1.0575000e-01
  -5.5990000e-02
   3.9560000e-02
   4.7460000e-02
   3.3610000e-02
  -7.4000000e-04
  -1.7820000e-02
  -1.0250000e-02
  -3.2790000e-02
  -1.4480000e-02
   2.7530000e-02
   1.7520000e-02
   3.3610000e-02
   5.4400000e-02
   2.9780000e-02
  -2.9300000e-03
  -4.8150000e-02
  -5.4970000e-02
  -1.4340000e-02
  -3.0380000e-02
  -4.3540000e-02
  -1.5960000e-02
   2.0290000e-02
   5.9850000e-02
   3.9480000e-02
   3.0980000e-02
   3.4880000e-02
  -2.4480000e-02
   9.9000000e-04
   1.9440000e-02
  -5.1770000e-02
  -4.2550000e-02
  -5.8130000e-02
  -6.7370000e-02
   3.1670000e-02
   3.0410000e-02
  -8.4700000e-03
   2.0700000e-02
  -3.6190000e-02
  -8.8290000e-02
  -3.4380000e-02
  -3.0240000e-02
  -2.6070000e-02
   8.7220000e-02
   1.0435000e-01
   5.7990000e-02
   4.2330000e-02
  -3.0540000e-02
  -4.4060000e-02
   2.3740000e-02
   1.8010000e-02
  -2.3250000e-02
   5.1800000e-03
   5.2600000e-03
  -5.0610000e-02
  -5.5550000e-02
  -7.8420000e-02
  -5.8700000e-02
  -4.8500000e-03
  -1.7380000e-02
   5.2150000e-02
   8.1930000e-02
  -1.2280000e-02
  -5.7600000e-03
   6.4200000e-03
   3.3970000e-02
   9.1960000e-02
   3.3780000e-02
   2.6900000e-03
   9.9500000e-03
  -4.6310000e-02
  -5.7820000e-02
  -7.2770000e-02
  -6.4380000e-02
  -7.2900000e-03
  -2.1390000e-02
  -4.6250000e-02
   3.1800000e-03
  -2.0560000e-02
  -3.9370000e-02
   6.7670000e-02
   6.3090000e-02
   2.1900000e-03
   3.6470000e-02
   1.8780000e-02
   4.0830000e-02
   7.4580000e-02
   4.1700000e-03
  -1.4280000e-02
  -8.6600000e-03
  -7.1920000e-02
  -8.0910000e-02
  -2.5960000e-02
  -2.0180000e-02
  -8.5300000e-03
   3.4490000e-02
  -2.8900000e-02
  -7.3560000e-02
  -5.2200000e-02
  -8.2910000e-02
  -4.7400000e-03
   7.7130000e-02
   4.4800000e-02
   6.4540000e-02
   8.5050000e-02
   1.5820000e-02
   1.8750000e-02
   3.1170000e-02
  -5.0070000e-02
  -4.1130000e-02
  -1.0940000e-02
  -2.4700000e-02
  -3.6190000e-02
  -6.4570000e-02
  -8.7930000e-02
  -7.3320000e-02
   5.9500000e-03
   6.1640000e-02
   2.6600000e-02
   1.2500000e-02
   5.4510000e-02
   4.0550000e-02
   4.6580000e-02
   3.5950000e-02
   1.3700000e-03
   8.1200000e-03
  -8.0900000e-03
  -2.7340000e-02
   9.6500000e-03
  -2.0370000e-02
  -5.0720000e-02
  -2.9910000e-02
  -2.8760000e-02
  -4.0740000e-02
  -4.3290000e-02
  -4.4640000e-02
  -5.2400000e-03
  -4.3600000e-03
   2.7660000e-02
   6.7040000e-02
   6.1200000e-02
   6.8460000e-02
   5.9830000e-02
   3.1500000e-02
   3.2680000e-02
  -1.5850000e-02
  -4.7080000e-02
  -4.2000000e-02
  -8.6150000e-02
  -9.3630000e-02
  -5.1130000e-02
  -3.5450000e-02
   1.0940000e-02
  -3.0000000e-04
  -2.2150000e-02
   1.1410000e-02
   2.7940000e-02
   2.3720000e-02
   4.1950000e-02
   2.7970000e-02
   2.1700000e-03
  -3.1800000e-03
  -2.3800000e-02
  -4.3540000e-02
  -5.8130000e-02
  -6.0790000e-02
  -2.4480000e-02
  -9.6800000e-03
  -1.7360000e-02
  -1.9000000e-02
  -8.8600000e-03
   4.4610000e-02
   1.2130000e-01
   1.1529000e-01
   4.5190000e-02
   4.9520000e-02
   8.8600000e-03
  -7.7240000e-02
  -9.5250000e-02
  -6.7420000e-02
  -1.9170000e-02
   3.0320000e-02
   2.5140000e-02
   2.0970000e-02
  -2.1330000e-02
  -3.6660000e-02
  -2.7660000e-02
   3.0300000e-02
   1.1346000e-01
   3.6800000e-02
  -1.8450000e-02
   7.6500000e-03
  -4.0280000e-02
  -6.7830000e-02
  -3.6080000e-02
  -1.5300000e-02
   5.3700000e-03
   2.7390000e-02
   4.2800000e-03
  -2.3220000e-02
  -2.0560000e-02
  -2.3830000e-02
  -1.8620000e-02
   2.1400000e-03
  -4.0500000e-02
  -4.2610000e-02
  -7.4000000e-03
   1.4560000e-02
   4.5710000e-02
   7.6550000e-02
   2.2320000e-02
   1.0170000e-02
   1.7270000e-02
  -2.9780000e-02
  -2.0920000e-02
  -3.9950000e-02
  -1.2566000e-01
  -5.1600000e-02
   1.7790000e-02
  -1.5460000e-02
   2.3740000e-02
   4.7820000e-02
  -5.2600000e-03
   1.1460000e-02
   3.1060000e-02
  -1.4590000e-02
   4.6900000e-03
   1.7380000e-02
  -2.3330000e-02
   2.2620000e-02
  -2.1900000e-03
  -4.2250000e-02
  -1.1540000e-02
  -2.6270000e-02
  -3.9290000e-02
  -4.7200000e-03
  -3.5370000e-02
  -3.6520000e-02
   6.3970000e-02
   8.1320000e-02
   5.4730000e-02
   9.2210000e-02
   6.8520000e-02
   2.7700000e-03
   2.1740000e-02
  -2.6320000e-02
  -9.3520000e-02
  -6.9640000e-02
  -8.8970000e-02
  -6.6050000e-02
   1.8480000e-02
  -2.4700000e-02
  -5.4640000e-02
   2.7280000e-02
  -4.0900000e-03
  -1.7680000e-02
   4.2660000e-02
   2.1000000e-02
   4.4400000e-03
   1.8970000e-02
  -8.0900000e-03
   4.0360000e-02
   3.4300000e-03
  -5.4480000e-02
   1.1650000e-02
  -1.8860000e-02
  -4.2110000e-02
   2.7100000e-03
  -1.5330000e-02
   2.4620000e-02
   6.3720000e-02
   1.2900000e-03
  -2.0260000e-02
  -1.1020000e-02
  -5.9330000e-02
  -7.0200000e-03
   5.8130000e-02
   1.6940000e-02
  -2.0290000e-02
  -5.1930000e-02
  -5.1270000e-02
   1.4040000e-02
  -3.9800000e-03
  -5.0560000e-02
  -9.0500000e-03
   1.3710000e-02
  -1.4610000e-02
   8.9900000e-03
   1.5880000e-02
  -3.9980000e-02
  -1.4920000e-02
   1.0500000e-02
  -2.9450000e-02
  -1.7770000e-02
   2.7400000e-03
   7.7000000e-03
   2.8490000e-02
   2.9170000e-02
   1.0170000e-02
  -1.0670000e-02
  -3.1500000e-03
   2.1910000e-02
   6.6190000e-02
   6.3230000e-02
  -2.9720000e-02
  -7.7980000e-02
  -5.4730000e-02
  -4.3100000e-02
  -2.2200000e-03
   3.5750000e-02
  -8.0600000e-03
  -1.2860000e-02
   1.9410000e-02
  -1.5960000e-02
  -1.6670000e-02
   3.0050000e-02
  -1.0090000e-02
   1.6890000e-02
   5.4730000e-02
  -5.0310000e-02
  -7.9790000e-02
  -4.4060000e-02
  -5.2310000e-02
  -1.0970000e-02
   1.5460000e-02
  -6.0350000e-02
  -2.8270000e-02
   3.6140000e-02
   1.1100000e-02
   9.2040000e-02
   1.0967000e-01
   1.6940000e-02
  -6.5500000e-03
  -2.3770000e-02
  -9.8400000e-03
   4.7710000e-02
  -1.4200000e-02
  -6.9010000e-02
  -4.9760000e-02
  -8.6970000e-02
  -5.0670000e-02
   9.1000000e-03
  -3.1530000e-02
   2.9530000e-02
   5.4510000e-02
  -2.8570000e-02
   4.6390000e-02
   4.7210000e-02
  -3.9350000e-02
   2.1280000e-02
   3.6270000e-02
   7.1000000e-03
   1.5930000e-02
  -3.1310000e-02
  -5.5060000e-02
  -2.8870000e-02
  -7.7680000e-02
  -7.1420000e-02
  -8.5000000e-03
  -1.9500000e-03
   4.9400000e-03
   6.0350000e-02
   3.9370000e-02
   2.6000000e-03
   3.2000000e-02
   2.5800000e-02
   3.4190000e-02
   7.2850000e-02
   1.6070000e-02
  -5.9910000e-02
  -5.6970000e-02
  -5.1380000e-02
  -3.2350000e-02
   7.0200000e-03
  -2.3420000e-02
  -2.7610000e-02
   1.3930000e-02
  -3.9150000e-02
  -5.7910000e-02
   8.9400000e-03
   2.0150000e-02
   2.3030000e-02
   6.1440000e-02
   4.3900000e-02
   1.6290000e-02
  -1.3050000e-02
  -6.7150000e-02
  -6.7010000e-02
  -6.0350000e-02
  -6.6760000e-02
  -1.8230000e-02
  -1.2280000e-02
   1.2500000e-02
   3.1590000e-02
   1.9630000e-02
   5.5990000e-02
   5.5440000e-02
   2.3800000e-02
   3.4380000e-02
  -1.5380000e-02
  -3.9510000e-02
  -2.1910000e-02
  -6.3830000e-02
  -3.3700000e-03
   5.6970000e-02
  -4.9900000e-03
   2.2100000e-02
  -8.4700000e-03
  -7.8220000e-02
   1.2040000e-02
   1.2940000e-02
  -2.6710000e-02
   5.3140000e-02
  -5.6800000e-03
  -4.6140000e-02
   4.6450000e-02
   1.2060000e-02
  -6.8000000e-03
   6.1640000e-02
  -2.9750000e-02
  -5.0750000e-02
  -7.5400000e-03
  -8.0550000e-02
  -1.3960000e-02
   3.2820000e-02
  -3.8170000e-02
   4.9900000e-02
  -5.8400000e-03
  -8.5110000e-02
   1.3110000e-02
   4.0300000e-03
   1.3740000e-02
   7.7540000e-02
  -1.7410000e-02
  -3.6110000e-02
  -9.2700000e-03
  -8.9680000e-02
  -3.9130000e-02
   1.9220000e-02
  -4.5820000e-02
   2.2800000e-03
   7.9000000e-03
  -6.8710000e-02
   1.2260000e-02
   2.8300000e-02
  -1.5400000e-03
   9.8210000e-02
   1.9060000e-02
  -4.5930000e-02
   2.9280000e-02
  -4.5840000e-02
   2.3690000e-02
   7.4850000e-02
  -5.2230000e-02
  -4.1700000e-03
   5.2000000e-04
  -7.1290000e-02
   1.8600000e-03
  -3.7840000e-02
  -1.1192000e-01
  -1.9550000e-02
  -1.6590000e-02
  -6.0600000e-03
   1.2552000e-01
   8.7130000e-02
   5.3380000e-02
   9.1190000e-02
  -5.1500000e-03
  -4.9850000e-02
  -1.6780000e-02
  -8.0580000e-02
  -7.5980000e-02
  -1.4970000e-02
  -1.1900000e-02
   1.7220000e-02
   3.9480000e-02
  -4.8720000e-02
  -4.5820000e-02
  -3.5600000e-03
   2.0300000e-03
   3.0650000e-02
   2.3910000e-02
   3.4110000e-02
   3.8470000e-02
  -1.1540000e-02
   2.7940000e-02
   1.4420000e-02
  -3.2680000e-02
   1.9170000e-02
  -2.9450000e-02
  -8.8640000e-02
  -9.3000000e-04
  -5.2090000e-02
  -8.8040000e-02
   1.9190000e-02
   0.0000000e+00
   1.6830000e-02
   6.2650000e-02
   4.4100000e-03
  -1.8400000e-02
  -1.4370000e-02
  -7.7920000e-02
  -4.1680000e-02
   2.0760000e-02
   2.5170000e-02
   5.4970000e-02
   3.3860000e-02
   1.9000000e-04
   1.5570000e-02
  -1.8670000e-02
  -3.4900000e-02
  -1.1930000e-02
  -3.8960000e-02
  -2.6020000e-02
   2.7280000e-02
  -2.3250000e-02
  -3.2630000e-02
   1.1840000e-02
   1.7140000e-02
   3.7480000e-02
   6.1360000e-02
   2.3580000e-02
   1.5600000e-03
  -1.7520000e-02
  -2.4810000e-02
   3.0200000e-03
  -3.5400000e-02
  -1.8040000e-02
   2.6430000e-02
  -1.7790000e-02
  -2.8930000e-02
  -1.9440000e-02
  -4.9380000e-02
  -3.8740000e-02
  -1.6010000e-02
  -1.1980000e-02
   6.2130000e-02
   8.5130000e-02
   1.5460000e-02
  -1.4500000e-03
  -2.5860000e-02
  -7.0930000e-02
  -1.5850000e-02
   3.0930000e-02
   4.8500000e-03
   4.0090000e-02
   4.7680000e-02
  -1.3330000e-02
  -1.2260000e-02
  -3.9400000e-02
  -6.3010000e-02
  -1.6420000e-02
  -1.3330000e-02
   3.4380000e-02
   6.5610000e-02
  -9.6000000e-03
  -6.0600000e-03
  -2.2430000e-02
  -6.5040000e-02
  -1.9700000e-03
   2.2070000e-02
   1.1760000e-02
   9.2400000e-03
  -2.9280000e-02
   1.9990000e-02
   1.1570000e-02
  -5.4700000e-02
   1.0140000e-02
   2.7830000e-02
   2.7940000e-02
   3.8500000e-02
  -3.3450000e-02
  -2.9800000e-02
   3.2460000e-02
  -5.0310000e-02
  -6.6050000e-02
  -4.1950000e-02
  -1.0641000e-01
  -2.1280000e-02
   9.8490000e-02
   4.7820000e-02
   4.9050000e-02
   1.6830000e-02
  -3.4880000e-02
   4.7000000e-04
   2.8270000e-02
   4.9790000e-02
   2.6900000e-02
  -2.0210000e-02
  -4.3540000e-02
  -4.4550000e-02
  -2.9310000e-02
  -6.6740000e-02
  -3.9370000e-02
   3.1280000e-02
   7.2400000e-03
  -5.5100000e-03
  -2.7340000e-02
  -6.3580000e-02
  -8.8000000e-04
   8.8090000e-02
   1.1461000e-01
   8.6610000e-02
   5.3330000e-02
   4.1700000e-03
  -4.1480000e-02
  -9.0920000e-02
  -1.2009000e-01
  -1.0962000e-01
  -1.2653000e-01
  -3.0130000e-02
   6.5230000e-02
   5.3080000e-02
   5.1770000e-02
   3.3120000e-02
  -1.1650000e-02
   1.6310000e-02
   1.3900000e-02
   8.9100000e-03
   5.7610000e-02
   2.1190000e-02
  -3.3700000e-03
   2.2370000e-02
  -4.3180000e-02
  -6.9340000e-02
  -3.1090000e-02
  -4.8200000e-02
  -9.3200000e-03
   1.2230000e-02
  -6.7120000e-02
   4.2250000e-02
   8.1900000e-02
   8.4200000e-03
   4.8420000e-02
   1.3050000e-02
  -6.4900000e-02
   2.0450000e-02
   2.9940000e-02
  -2.1100000e-03
   4.2470000e-02
  -1.3760000e-02
  -3.1480000e-02
   1.0360000e-02
  -7.5400000e-03
   3.2740000e-02
   1.0280000e-02
  -1.2231000e-01
  -4.2030000e-02
  -4.0170000e-02
  -9.0430000e-02
   6.8680000e-02
   1.2009000e-01
   8.8970000e-02
   1.4444000e-01
   5.1630000e-02
  -1.0279000e-01
  -6.6870000e-02
  -1.2489000e-01
  -1.2678000e-01
   9.4600000e-03
  -1.4890000e-02
   4.9000000e-04
   8.1820000e-02
  -3.0270000e-02
  -5.8590000e-02
   2.3200000e-02
  -1.1100000e-02
   5.2890000e-02
   7.5020000e-02
  -3.0020000e-02
   2.7450000e-02
   2.0760000e-02
  -8.4450000e-02
  -4.1700000e-03
  -3.2680000e-02
  -8.2340000e-02
   6.3600000e-03
  -3.5400000e-02
  -4.6610000e-02
   5.9500000e-02
  -4.3600000e-03
   1.6260000e-02
   7.9980000e-02
  -2.3110000e-02
  -3.7150000e-02
  -9.0000000e-04
  -2.8050000e-02
   4.2800000e-03
  -3.4000000e-03
  -2.1410000e-02
   6.2600000e-02
   2.3800000e-02
  -1.9470000e-02
   4.1480000e-02
  -1.5000000e-02
  -5.6260000e-02
  -2.7500000e-02
  -6.0570000e-02
  -2.1610000e-02
   6.1700000e-03
  -2.6100000e-02
   4.9020000e-02
   8.4800000e-02
   3.5640000e-02
   4.9300000e-02
   3.9540000e-02
  -3.7920000e-02
  -4.9600000e-02
  -3.7210000e-02
   1.0250000e-02
   3.3290000e-02
  -4.0250000e-02
  -2.3000000e-02
   1.6150000e-02
  -3.7560000e-02
  -6.7400000e-03
   3.5400000e-02
  -1.1050000e-02
   1.0690000e-02
   9.7600000e-03
  -9.8700000e-03
   2.8680000e-02
   1.3630000e-02
  -2.7640000e-02
   8.6900000e-03
  -4.2110000e-02
  -4.6970000e-02
  -1.5660000e-02
  -4.7490000e-02
  -3.6200000e-03
   2.4900000e-02
   2.9470000e-02
   7.7700000e-02
   1.7790000e-02
  -3.3750000e-02
   5.6200000e-03
  -5.3080000e-02
  -5.3960000e-02
   2.4790000e-02
   6.9900000e-03
   3.6820000e-02
   1.0079000e-01
   2.0590000e-02
  -4.3020000e-02
  -6.2790000e-02
  -1.3073000e-01
  -6.0700000e-02
   2.0340000e-02
   3.3200000e-03
   5.6200000e-03
   2.4570000e-02
  -1.7160000e-02
   3.3450000e-02
   6.5910000e-02
   2.7140000e-02
  -8.7700000e-03
  -3.4680000e-02
  -2.8080000e-02
   1.3600000e-02
   4.6750000e-02
   1.2230000e-02
  -3.1310000e-02
  -6.8800000e-03
  -2.3250000e-02
  -6.6210000e-02
  -2.3170000e-02
  -1.7000000e-03
   2.2020000e-02
   8.2060000e-02
   1.6260000e-02
  -3.3070000e-02
   1.2800000e-02
  -5.9250000e-02
  -4.1020000e-02
   6.7040000e-02
  -2.5960000e-02
  -5.9220000e-02
  -2.4160000e-02
  -5.3080000e-02
   2.0600000e-03
  -7.5400000e-03
  -3.7650000e-02
   1.6890000e-02
  -2.3550000e-02
  -1.8400000e-02
   2.9860000e-02
  -3.5010000e-02
   1.7930000e-02
   5.3140000e-02
   1.0010000e-02
   1.0359000e-01
   6.1770000e-02
  -4.7820000e-02
   3.6930000e-02
  -8.3600000e-03
  -9.7090000e-02
  -1.4070000e-02
  -9.9800000e-03
  -4.9600000e-03
   4.4280000e-02
   8.5800000e-03
   1.6150000e-02
   4.1400000e-02
   6.3600000e-03
  -1.2560000e-02
  -3.2410000e-02
  -5.7520000e-02
  -1.7990000e-02
  -7.4000000e-03
   2.5880000e-02
   8.8310000e-02
   3.9870000e-02
   2.1400000e-03
   1.0140000e-02
  -5.1790000e-02
  -5.0010000e-02
  -5.0810000e-02
  -7.1810000e-02
   9.4600000e-03
   3.4380000e-02
   2.7100000e-03
   3.3530000e-02
   3.6360000e-02
  -1.3160000e-02
  -3.1700000e-02
  -1.6670000e-02
  -1.2340000e-02
   2.8190000e-02
   4.6170000e-02
  -7.9000000e-03
  -3.1750000e-02
  -1.6700000e-02
   1.1200000e-03
   2.6160000e-02
   4.7400000e-03
  -1.6830000e-02
  -4.2800000e-03
  -2.9010000e-02
  -1.6590000e-02
  -2.9100000e-03
  -5.1520000e-02
  -4.4470000e-02
  -9.0800000e-03
  -2.7530000e-02
  -3.1780000e-02
   5.8400000e-03
   7.2400000e-03
   4.5930000e-02
   5.3770000e-02
   1.6010000e-02
   3.8710000e-02
  -6.6900000e-03
  -5.5960000e-02
  -1.3270000e-02
  -7.1300000e-03
  -2.0730000e-02
  -3.1500000e-03
  -3.0980000e-02
   1.2720000e-02
   8.9410000e-02
   1.0420000e-02
  -3.8550000e-02
  -2.5800000e-03
  -2.1080000e-02
   3.8880000e-02
   9.0620000e-02
   5.1900000e-02
   1.7990000e-02
  -3.8850000e-02
  -2.4210000e-02
   3.1060000e-02
  -2.5200000e-02
  -2.6350000e-02
   1.9910000e-02
  -2.1360000e-02
  -4.1150000e-02
  -6.3940000e-02
  -6.2710000e-02
   1.9000000e-02
  -3.0400000e-03
  -3.4900000e-02
   5.4430000e-02
   7.3920000e-02
  -3.5700000e-02
  -4.6890000e-02
   1.5460000e-02
   2.0920000e-02
   4.1400000e-03
   5.8900000e-03
   5.2010000e-02
   4.0410000e-02
  -6.0270000e-02
  -4.1920000e-02
  -6.6600000e-03
  -8.6640000e-02
  -9.1770000e-02
  -5.1300000e-03
   1.8890000e-02
  -1.6040000e-02
   4.7400000e-03
   2.8490000e-02
   6.7340000e-02
   6.9070000e-02
  -1.2060000e-02
   3.1720000e-02
   7.3040000e-02
  -2.8570000e-02
  -3.3530000e-02
   1.6640000e-02
  -5.4730000e-02
  -5.8130000e-02
  -1.7580000e-02
  -2.8600000e-02
  -6.0600000e-03
  -7.7000000e-03
  -3.8520000e-02
   1.8590000e-02
   6.6650000e-02
   7.3200000e-03
   9.9000000e-04
   5.1900000e-02
   2.6100000e-02
  -1.1210000e-02
   9.7300000e-03
   7.0140000e-02
   2.5770000e-02
  -3.4680000e-02
  -9.5440000e-02
  -9.3740000e-02
  -1.5600000e-02
  -5.0040000e-02
  -2.4400000e-02
   7.5950000e-02
   2.1720000e-02
  -1.5160000e-02
   1.0860000e-02
   1.4090000e-02
   1.0780000e-02
   9.3000000e-04
   1.6730000e-02
   9.8730000e-02
   6.6600000e-02
  -7.2140000e-02
  -7.3290000e-02
  -4.5240000e-02
  -6.1250000e-02
  -2.1440000e-02
  -1.1500000e-03
  -7.7870000e-02
  -8.1130000e-02
  -2.7280000e-02
  -5.5000000e-04
   6.0650000e-02
   3.8580000e-02
  -1.3190000e-02
   6.2160000e-02
   9.0290000e-02
   3.6000000e-04
  -3.3920000e-02
  -2.8950000e-02
  -3.1830000e-02
   2.0210000e-02
   5.4510000e-02
   4.8310000e-02
  -4.6530000e-02
  -6.6080000e-02
  -2.2430000e-02
  -8.3900000e-03
  -2.8000000e-03
   1.2910000e-02
  -1.6420000e-02
   3.0900000e-02
   8.9300000e-02
   1.6700000e-02
  -2.9610000e-02
  -1.3960000e-02
  -8.6090000e-02
  -4.1130000e-02
   3.6270000e-02
   4.6420000e-02
   1.1765000e-01
   5.5490000e-02
  -2.9750000e-02
  -1.4670000e-02
  -1.1357000e-01
  -1.2730000e-01
  -5.7820000e-02
  -7.2190000e-02
  -6.7400000e-03
   7.3750000e-02
   3.8330000e-02
   7.8360000e-02
   5.2180000e-02
   5.5700000e-03
   6.8520000e-02
   5.3500000e-03
  -5.7330000e-02
  -3.3290000e-02
  -5.7960000e-02
  -5.8980000e-02
  -1.9880000e-02
  -4.9850000e-02
  -5.5400000e-03
   8.8600000e-03
  -2.1630000e-02
   5.7610000e-02
   1.1800000e-03
  -6.3450000e-02
   7.6800000e-03
  -3.7070000e-02
  -3.9620000e-02
   3.1780000e-02
  -2.7200000e-02
   4.7240000e-02
   1.1746000e-01
   1.6200000e-03
   1.8780000e-02
   1.8180000e-02
  -1.2094000e-01
  -5.0450000e-02
   2.5940000e-02
  -2.2730000e-02
   6.6320000e-02
   6.5200000e-02
   5.3700000e-03
   3.3230000e-02
   3.7800000e-03
   1.5740000e-02
   1.3490000e-02
  -5.2780000e-02
  -3.7000000e-03
   5.9280000e-02
  -5.8070000e-02
  -8.0230000e-02
  -1.8260000e-02
  -2.6270000e-02
   6.1610000e-02
   6.4510000e-02
  -2.7060000e-02
   2.2370000e-02
  -2.9500000e-02
  -7.4500000e-02
   3.7560000e-02
  -1.5850000e-02
  -7.0740000e-02
   3.7510000e-02
   2.7090000e-02
  -1.0100000e-03
   2.2950000e-02
  -8.5220000e-02
  -5.1900000e-02
   6.9810000e-02
  -8.4700000e-03
   1.5050000e-02
   4.4530000e-02
  -4.5570000e-02
  -4.7000000e-04
  -2.8210000e-02
  -8.9190000e-02
   3.9620000e-02
   1.9190000e-02
  -1.6970000e-02
   9.7500000e-02
   1.3570000e-02
  -9.2210000e-02
  -5.4560000e-02
  -9.8270000e-02
  -5.8240000e-02
   7.6660000e-02
   2.8680000e-02
   4.0190000e-02
   6.4160000e-02
  -2.6540000e-02
   2.3000000e-03
   6.2100000e-02
  -6.4160000e-02
  -2.9310000e-02
   3.4630000e-02
  -1.5680000e-02
   2.6790000e-02
   1.1800000e-03
  -4.0880000e-02
   2.8490000e-02
   1.7800000e-03
  -5.1000000e-03
   8.3350000e-02
   1.3350000e-02
  -3.7620000e-02
   2.8840000e-02
  -4.6600000e-03
   9.3500000e-03
   3.0400000e-03
  -4.1980000e-02
   2.9500000e-02
  -7.1800000e-03
  -7.5670000e-02
  -2.8160000e-02
  -5.4430000e-02
  -2.5750000e-02
   3.4790000e-02
  -1.0090000e-02
   1.5900000e-02
   9.7300000e-03
  -3.3830000e-02
   4.9380000e-02
   2.7060000e-02
  -9.2020000e-02
  -3.9240000e-02
  -1.3650000e-02
  -8.7700000e-03
   5.8650000e-02
   1.6070000e-02
  -6.9600000e-03
   9.1300000e-03
  -2.5800000e-02
  -9.6000000e-03
  -3.1170000e-02
  -9.1990000e-02
  -2.6460000e-02
   4.6360000e-02
   4.4250000e-02
   3.2220000e-02
   1.5100000e-03
   1.8600000e-03
   2.1690000e-02
   1.7330000e-02
   1.4670000e-02
  -2.0450000e-02
  -5.8760000e-02
  -1.4890000e-02
  -3.2400000e-03
  -2.2100000e-02
  -1.5300000e-02
  -3.4550000e-02
  -6.0600000e-03
   1.7190000e-02
  -9.9000000e-03
   2.8710000e-02
   6.7750000e-02
   7.8100000e-03
  -3.3200000e-03
   1.4340000e-02
  -7.7600000e-03
   2.2400000e-02
   3.3560000e-02
  -2.9900000e-03
  -8.0300000e-03
  -4.1570000e-02
  -8.7350000e-02
  -5.8260000e-02
  -4.2690000e-02
  -2.1300000e-02
   5.3520000e-02
   4.8780000e-02
   1.8560000e-02
   3.8030000e-02
  -3.5450000e-02
  -3.1370000e-02
   2.8210000e-02
   3.6500000e-03
   3.9950000e-02
   4.2530000e-02
  -3.8630000e-02
  -3.8080000e-02
  -5.0280000e-02
  -6.2620000e-02
  -1.7220000e-02
  -2.8460000e-02
   1.6180000e-02
   3.7370000e-02
  -7.8910000e-02
  -6.6020000e-02
   2.9940000e-02
  -1.5330000e-02
   4.5130000e-02
   9.7910000e-02
   8.5300000e-03
   4.2530000e-02
   2.4680000e-02
  -1.5190000e-02
   6.1660000e-02
  -1.2230000e-02
  -4.2090000e-02
   4.7300000e-02
  -1.1460000e-02
  -1.0090000e-02
   3.2900000e-02
  -5.2860000e-02
  -7.2820000e-02
  -2.7970000e-02
  -6.2100000e-02
  -6.6600000e-02
  -6.1990000e-02
  -5.2730000e-02
   6.2460000e-02
   8.8940000e-02
   4.6560000e-02
   5.2890000e-02
   4.7210000e-02
   2.1390000e-02
   3.5780000e-02
   1.9600000e-02
   1.1210000e-02
   7.8400000e-03
  -7.3120000e-02
  -7.7480000e-02
  -9.2180000e-02
  -1.3098000e-01
  -6.1090000e-02
   4.0170000e-02
   5.3630000e-02
   5.0530000e-02
   4.5490000e-02
  -1.5980000e-02
  -1.2610000e-02
   1.8340000e-02
   4.0140000e-02
   9.0530000e-02
   1.0852000e-01
   2.9640000e-02
   2.5500000e-03
  -2.2590000e-02
  -1.1535000e-01
  -1.2599000e-01
  -1.2749000e-01
  -1.0529000e-01
  -5.3710000e-02
  -1.0720000e-02
  -1.1930000e-02
   1.3600000e-02
   6.9370000e-02
   4.2250000e-02
   8.3870000e-02
   1.4326000e-01
   3.4380000e-02
   1.4010000e-02
   4.6470000e-02
  -5.8510000e-02
  -5.1000000e-02
  -4.7540000e-02
  -1.1787000e-01
   3.0000000e-05
   1.6620000e-02
  -5.6180000e-02
   6.2620000e-02
   2.3220000e-02
  -9.0890000e-02
  -1.2940000e-02
  -1.7220000e-02
   4.5190000e-02
   1.0888000e-01
   4.9900000e-02
   5.6700000e-02
   4.5290000e-02
  -6.8460000e-02
  -5.2890000e-02
  -1.2580000e-02
  -5.5110000e-02
  -4.9050000e-02
  -1.7660000e-02
  -3.4570000e-02
  -4.6800000e-02
  -1.3240000e-02
  -2.3220000e-02
   3.1300000e-03
   9.3800000e-03
  -4.8000000e-03
   3.2110000e-02
   8.1400000e-03
  -8.5500000e-03
   6.9900000e-03
  -3.1560000e-02
   3.7300000e-03
   5.4180000e-02
   2.5860000e-02
   1.5880000e-02
  -1.2200000e-02
  -4.6230000e-02
  -3.6360000e-02
  -4.0170000e-02
  -5.1030000e-02
   2.1400000e-03
   4.7300000e-02
   5.3300000e-02
   8.7980000e-02
   1.3680000e-02
  -4.2470000e-02
  -4.4060000e-02
  -9.2210000e-02
  -2.0620000e-02
   3.3040000e-02
   7.2700000e-03
   2.2780000e-02
  -2.0290000e-02
  -8.2280000e-02
   6.1100000e-03
   1.2890000e-02
   1.1130000e-02
   6.6210000e-02
   2.5830000e-02
  -4.0500000e-02
  -2.5800000e-02
  -5.4230000e-02
  -2.9890000e-02
   5.1660000e-02
   7.2660000e-02
   5.2530000e-02
   1.8150000e-02
  -3.9150000e-02
  -7.3620000e-02
  -4.1370000e-02
  -1.5960000e-02
  -3.3480000e-02
   4.6100000e-03
   3.8710000e-02
  -2.5030000e-02
   1.1000000e-03
  -2.7700000e-03
  -1.0353000e-01
  -7.2700000e-03
   8.9000000e-02
   3.2000000e-02
   6.6520000e-02
   4.0220000e-02
  -4.9540000e-02
   3.5100000e-03
  -2.9310000e-02
  -6.2760000e-02
   4.7270000e-02
  -1.6560000e-02
  -3.4050000e-02
   4.6170000e-02
  -3.6300000e-02
  -6.7720000e-02
   4.0720000e-02
  -1.4070000e-02
  -4.3320000e-02
   2.2350000e-02
  -1.7680000e-02
   2.7250000e-02
   6.7750000e-02
   9.7600000e-03
   3.6500000e-03
   4.9400000e-03
  -4.0090000e-02
  -6.7450000e-02
  -3.6410000e-02
  -2.6510000e-02
  -5.6070000e-02
  -4.5240000e-02
  -2.3630000e-02
  -5.4800000e-03
   5.1740000e-02
   5.6840000e-02
   5.3660000e-02
   6.4980000e-02
   4.4700000e-03
   8.2000000e-04
   2.8620000e-02
  -1.3980000e-02
  -3.1090000e-02
  -4.4400000e-03
  -4.5290000e-02
  -4.3490000e-02
  -4.0520000e-02
  -5.3930000e-02
  -8.9700000e-03
   1.3000000e-02
  -3.3010000e-02
   1.0830000e-02
   5.8980000e-02
   3.8470000e-02
   8.4280000e-02
   7.0570000e-02
   9.0200000e-03
  -1.6500000e-03
  -6.5280000e-02
  -9.0340000e-02
  -3.5230000e-02
  -4.8830000e-02
  -2.9200000e-02
   4.8390000e-02
   2.8650000e-02
  -6.4400000e-03
  -1.9030000e-02
  -8.1930000e-02
  -7.0050000e-02
  -7.5400000e-03
  -2.5000000e-04
   5.2670000e-02
   1.2209000e-01
   8.8340000e-02
   5.4780000e-02
   3.5840000e-02
  -4.4250000e-02
  -9.0400000e-02
  -7.0300000e-02
  -4.2610000e-02
  -2.1170000e-02
  -2.3310000e-02
  -2.6950000e-02
  -2.0780000e-02
  -2.6730000e-02
   5.0400000e-03
   8.1700000e-03
   1.9990000e-02
   5.9740000e-02
   8.1200000e-03
   7.0500000e-03
   7.2080000e-02
   3.7800000e-03
   8.8000000e-04
   4.7160000e-02
  -4.5380000e-02
  -1.9470000e-02
  -1.8900000e-03
  -8.7960000e-02
  -6.5260000e-02
  -6.2100000e-02
  -1.0021000e-01
   5.7720000e-02
   1.1474000e-01
   7.0570000e-02
   9.0810000e-02
  -3.2460000e-02
  -1.0726000e-01
  -4.2960000e-02
  -3.3420000e-02
   1.6090000e-02
   7.0380000e-02
   2.1110000e-02
   2.9170000e-02
   3.3970000e-02
  -6.1310000e-02
  -7.8000000e-02
  -8.9160000e-02
  -8.0420000e-02
   8.2000000e-03
   2.8210000e-02
   4.4420000e-02
   6.9750000e-02
   2.2350000e-02
   2.2870000e-02
   1.1160000e-02
  -2.6490000e-02
  -1.4010000e-02
  -6.9940000e-02
  -8.5460000e-02
  -2.8680000e-02
  -2.6270000e-02
   2.0780000e-02
   5.2040000e-02
   1.0690000e-02
   1.4370000e-02
  -9.6000000e-03
  -4.8720000e-02
  -3.4800000e-03
  -3.4330000e-02
  -1.0910000e-02
   7.1150000e-02
   6.2130000e-02
   5.7220000e-02
   7.0220000e-02
   8.7700000e-03
  -1.9360000e-02
  -5.6180000e-02
  -1.5140000e-01
  -5.6020000e-02
  -3.8900000e-03
  -5.5580000e-02
   4.8390000e-02
   5.5960000e-02
  -4.6250000e-02
   9.9000000e-03
   5.0480000e-02
   1.7930000e-02
   1.3980000e-02
  -3.9370000e-02
  -3.2630000e-02
   6.9420000e-02
   8.6260000e-02
   5.5060000e-02
   3.7400000e-02
  -5.9500000e-02
  -1.5982000e-01
  -1.2026000e-01
  -8.2360000e-02
  -3.7590000e-02
   1.1240000e-02
   4.6780000e-02
   1.0337000e-01
   9.2210000e-02
   1.1460000e-02
   1.3430000e-02
   1.4700000e-02
   1.7300000e-02
   2.1030000e-02
  -3.8330000e-02
  -3.4990000e-02
  -3.3810000e-02
  -8.6420000e-02
  -2.2430000e-02
   1.6230000e-02
  -2.4790000e-02
  -2.4070000e-02
  -5.3250000e-02
  -2.7800000e-02
   5.0200000e-03
  -4.6170000e-02
   1.9600000e-02
   7.1780000e-02
   2.7170000e-02
   3.9760000e-02
  -3.2100000e-03
  -5.1240000e-02
  -1.7990000e-02
  -5.4890000e-02
  -5.3030000e-02
   6.4900000e-02
   3.0540000e-02
   9.8200000e-03
   4.4610000e-02
  -5.1350000e-02
  -3.3860000e-02
   2.2980000e-02
  -3.2930000e-02
  -9.2700000e-03
  -3.3480000e-02
  -9.1410000e-02
   9.3500000e-03
   2.4870000e-02
   3.1450000e-02
   1.1806000e-01
   3.9350000e-02
   1.8450000e-02
   8.2140000e-02
  -2.8300000e-02
  -8.1100000e-02
  -4.7630000e-02
  -8.4640000e-02
  -2.7450000e-02
   1.0940000e-02
  -1.1490000e-02
   1.2970000e-02
  -1.1380000e-02
  -3.4270000e-02
   6.5470000e-02
   8.0800000e-02
   3.0240000e-02
   2.7030000e-02
  -1.7110000e-02
  -3.0410000e-02
  -1.2940000e-02
  -2.1360000e-02
   9.0800000e-03
  -2.8320000e-02
  -7.0220000e-02
   2.8950000e-02
   4.1870000e-02
  -6.9070000e-02
  -4.9960000e-02
  -3.8300000e-02
  -4.0000000e-03
   5.1460000e-02
  -2.4540000e-02
  -3.5290000e-02
   3.2410000e-02
  -1.0170000e-02
   2.8490000e-02
   6.2680000e-02
  -1.2640000e-02
   1.9960000e-02
   1.3490000e-02
  -7.1010000e-02
  -1.5460000e-02
  -3.3480000e-02
  -9.0860000e-02
  -4.6890000e-02
  -2.8160000e-02
  -1.7740000e-02
  -4.9400000e-03
  -4.9350000e-02
  -1.9520000e-02
   9.2510000e-02
   7.3370000e-02
   4.5240000e-02
   6.9970000e-02
  -1.1630000e-02
  -5.2620000e-02
   2.5800000e-02
   2.6290000e-02
   1.5980000e-02
   9.2400000e-03
  -7.7210000e-02
  -4.3070000e-02
   2.0600000e-03
  -5.4840000e-02
  -2.5640000e-02
  -8.3400000e-03
  -3.1060000e-02
   5.4320000e-02
   6.2570000e-02
  -2.6020000e-02
  -3.7300000e-03
   4.3000000e-03
   1.7710000e-02
   9.7390000e-02
   1.8920000e-02
  -5.1550000e-02
  -5.5400000e-03
  -4.5840000e-02
  -7.6610000e-02
  -3.4350000e-02
  -6.8870000e-02
  -7.4250000e-02
  -2.0400000e-02
   1.8750000e-02
   4.3270000e-02
   9.2700000e-03
  -2.3600000e-03
   4.7430000e-02
   8.2000000e-04
   2.7010000e-02
   7.0140000e-02
   2.7000000e-04
   9.4300000e-03
   4.0500000e-02
  -2.4790000e-02
  -6.5300000e-03
  -9.3200000e-03
  -7.3620000e-02
  -4.2910000e-02
  -1.7250000e-02
  -4.6010000e-02
  -2.1930000e-02
  -2.6100000e-02
  -1.0280000e-02
   2.8600000e-02
  -1.7110000e-02
   4.6900000e-03
   6.1470000e-02
   2.1660000e-02
   3.3700000e-03
   2.2950000e-02
  -1.8510000e-02
  -4.9220000e-02
  -3.3750000e-02
   3.9320000e-02
   5.9250000e-02
   1.4000000e-04
  -2.9010000e-02
  -4.7760000e-02
  -2.6490000e-02
  -1.2010000e-02
  -3.0710000e-02
  -7.3500000e-03
   2.7800000e-02
   1.9820000e-02
  -4.2800000e-03
   3.9290000e-02
   3.2600000e-02
   5.4000000e-03
   6.1330000e-02
   4.7570000e-02
   2.8820000e-02
  -8.0000000e-05
  -5.6400000e-02
  -4.6800000e-02
  -4.7950000e-02
  -9.7660000e-02
  -7.0030000e-02
  -5.9390000e-02
  -7.6360000e-02
   8.7700000e-03
  -1.0890000e-02
  -7.2900000e-03
   1.0191000e-01
   1.7410000e-02
   1.0420000e-02
   8.3870000e-02
   8.7200000e-03
  -7.9500000e-03
   1.0140000e-02
  -5.2590000e-02
  -1.6940000e-02
  -1.1210000e-02
  -8.6780000e-02
  -1.5520000e-02
   8.0000000e-05
  -4.0800000e-02
   9.6000000e-03
   5.8000000e-04
  -3.9040000e-02
   4.0440000e-02
   5.7990000e-02
   1.8340000e-02
   4.5100000e-02
   3.7290000e-02
   5.0010000e-02
   6.8110000e-02
  -5.3700000e-03
  -6.8300000e-02
  -3.1500000e-02
  -2.8600000e-02
  -1.7000000e-03
   7.7980000e-02
   3.3810000e-02
  -5.2530000e-02
  -6.1830000e-02
  -6.9200000e-02
  -8.1730000e-02
  -4.2170000e-02
   6.8500000e-03
   5.4950000e-02
   7.6470000e-02
   4.5210000e-02
   1.8420000e-02
   5.3080000e-02
   5.9660000e-02
   7.4000000e-03
  -2.0870000e-02
  -5.6670000e-02
  -1.1842000e-01
  -1.2947000e-01
  -5.1770000e-02
  -3.7150000e-02
  -4.1950000e-02
  -5.7000000e-03
  -4.4310000e-02
  -2.3630000e-02
   4.2470000e-02
   2.7360000e-02
   5.0310000e-02
   6.4270000e-02
   2.2510000e-02
   7.1620000e-02
   6.7640000e-02
   8.7500000e-03
   4.1700000e-03
  -5.0720000e-02
  -8.9960000e-02
  -5.4180000e-02
  -6.5230000e-02
  -4.3570000e-02
  -1.1050000e-02
  -4.3730000e-02
   8.5300000e-03
   3.9890000e-02
   2.8510000e-02
   8.6700000e-02
   3.3810000e-02
  -1.1410000e-02
   5.5820000e-02
   9.5400000e-03
  -1.6500000e-03
   4.8060000e-02
  -7.9200000e-03
  -1.8150000e-02
  -5.9500000e-03
  -7.0960000e-02
  -7.8830000e-02
  -6.9830000e-02
  -9.9030000e-02
  -5.2750000e-02
   2.5550000e-02
   5.9250000e-02
   6.0590000e-02
   2.2290000e-02
   4.5490000e-02
   5.1680000e-02
  -7.2900000e-03
  -3.8700000e-03
   1.2780000e-02
  -1.0100000e-03
   5.7850000e-02
   2.9390000e-02
  -6.5580000e-02
  -4.5620000e-02
  -5.1930000e-02
  -8.0610000e-02
  -2.5440000e-02
  -4.8800000e-02
  -8.3380000e-02
   8.1200000e-03
   1.7520000e-02
   4.0470000e-02
   8.5540000e-02
   5.8480000e-02
   2.1170000e-02
  -1.0090000e-02
  -2.4100000e-02
   5.4300000e-03
  -1.9360000e-02
   1.7000000e-03
   3.3010000e-02
  -3.7890000e-02
  -6.9940000e-02
  -2.0620000e-02
  -7.2410000e-02
  -8.4640000e-02
  -1.2580000e-02
  -4.3810000e-02
   1.7600000e-02
   8.3900000e-02
   3.2440000e-02
   8.9630000e-02
   1.0435000e-01
   4.2090000e-02
   7.9810000e-02
   4.7210000e-02
  -7.8850000e-02
  -6.9890000e-02
  -8.2910000e-02
  -1.1417000e-01
  -2.0100000e-02
   2.4730000e-02
   3.6690000e-02
   7.9270000e-02
   3.7210000e-02
  -2.8000000e-03
  -1.7270000e-02
  -9.7970000e-02
  -6.3170000e-02
  -1.7140000e-02
  -1.3540000e-02
   4.0440000e-02
   8.2670000e-02
   5.5960000e-02
   2.5940000e-02
  -2.3420000e-02
  -7.7890000e-02
  -3.4410000e-02
   1.2420000e-02
  -2.9300000e-03
   2.6730000e-02
  -1.7470000e-02
  -8.3430000e-02
  -8.5220000e-02
  -2.2370000e-02
  -1.3000000e-02
   6.6900000e-03
   5.1050000e-02
   7.5480000e-02
   3.5920000e-02
   1.4000000e-03
   7.1600000e-03
   4.5680000e-02
   7.7070000e-02
   5.0750000e-02
   1.1980000e-02
  -3.2900000e-02
  -1.1115000e-01
  -1.4798000e-01
  -7.1040000e-02
  -2.1630000e-02
  -2.3850000e-02
   2.5770000e-02
   1.4040000e-02
   2.8800000e-03
   3.8910000e-02
   3.6050000e-02
   6.7480000e-02
   8.0750000e-02
   2.2620000e-02
   1.1270000e-02
   2.6270000e-02
  -3.6740000e-02
  -6.9260000e-02
  -6.9830000e-02
  -6.6520000e-02
  -2.1740000e-02
  -4.8640000e-02
  -4.3920000e-02
   9.9500000e-03
   4.1430000e-02
   3.5590000e-02
   2.2100000e-02
   4.0280000e-02
   4.2720000e-02
   3.3180000e-02
   7.2190000e-02
   8.1820000e-02
  -1.4300000e-03
  -1.6970000e-02
  -2.1660000e-02
  -1.1014000e-01
  -9.5420000e-02
  -7.5700000e-02
  -6.2540000e-02
   2.7610000e-02
   8.2500000e-03
  -2.8570000e-02
   3.5150000e-02
   3.0760000e-02
   1.7470000e-02
   4.5350000e-02
   1.2860000e-02
  -1.7850000e-02
  -5.3500000e-03
  -3.9260000e-02
  -5.3250000e-02
  -7.6500000e-03
   1.8180000e-02
   8.1200000e-03
   1.1000000e-04
  -2.3140000e-02
  -3.7560000e-02
  -2.1280000e-02
  -8.9400000e-03
   1.4640000e-02
   9.6200000e-03
  -4.7700000e-03
   2.4160000e-02
   3.5920000e-02
   3.5290000e-02
   4.2690000e-02
   3.0000000e-04
   1.6590000e-02
  -1.7790000e-02
  -9.3390000e-02
  -5.9580000e-02
  -1.4010000e-02
   4.0600000e-03
   1.8040000e-02
  -4.5500000e-03
  -1.5190000e-02
   1.5600000e-02
  -8.9700000e-03
  -4.3600000e-03
   3.9130000e-02
  -1.3400000e-03
  -1.1800000e-03
   1.9380000e-02
  -8.8300000e-03
  -1.3300000e-02
  -8.0000000e-04
  -4.9000000e-04
   4.3680000e-02
  -1.8230000e-02
  -8.2170000e-02
  -2.2350000e-02
  -2.8460000e-02
  -2.5010000e-02
  -2.0070000e-02
   5.1800000e-03
   3.1860000e-02
  -2.1630000e-02
  -3.1890000e-02
   1.9660000e-02
   2.2700000e-02
   7.8400000e-03
   5.7610000e-02
   6.6740000e-02
   3.9400000e-02
  -4.3570000e-02
  -9.1850000e-02
  -5.4450000e-02
  -6.3340000e-02
  -3.3590000e-02
   4.6560000e-02
   2.6840000e-02
   2.5800000e-02
   3.8440000e-02
  -3.0200000e-03
   2.3000000e-03
  -8.5500000e-03
  -1.1019000e-01
  -4.1260000e-02
   3.0020000e-02
  -2.1720000e-02
   3.5340000e-02
   5.6120000e-02
  -2.6810000e-02
   3.0540000e-02
   5.3710000e-02
  -7.4000000e-04
   3.3590000e-02
  -1.4670000e-02
  -5.9990000e-02
   2.1900000e-03
  -2.5550000e-02
  -6.3450000e-02
  -4.1510000e-02
   1.5270000e-02
   3.8060000e-02
   3.3370000e-02
   1.7740000e-02
   7.8100000e-03
  -2.1300000e-02
  -4.5160000e-02
  -1.3110000e-02
   3.6330000e-02
   1.0156000e-01
   7.3320000e-02
   1.8340000e-02
  -1.4500000e-03
  -7.1860000e-02
  -1.0923000e-01
  -8.1760000e-02
  -3.6900000e-02
   7.3200000e-03
  -2.7100000e-03
   1.8260000e-02
   2.5860000e-02
   3.5100000e-03
  -7.9000000e-03
  -1.3520000e-02
  -1.2230000e-02
  -2.0260000e-02
  -2.0210000e-02
  -2.2070000e-02
   2.6350000e-02
   8.5600000e-02
   3.4000000e-02
  -9.2700000e-03
   7.7600000e-03
  -4.6140000e-02
  -7.9020000e-02
  -5.4340000e-02
  -9.6460000e-02
  -1.0224000e-01
  -2.4700000e-02
   6.5300000e-03
   5.0310000e-02
   1.0630000e-01
   5.1440000e-02
   5.7110000e-02
   9.0920000e-02
   3.6800000e-02
   1.5490000e-02
  -4.0600000e-03
  -3.8300000e-02
  -4.5200000e-03
  -4.8300000e-03
  -3.4080000e-02
  -3.7860000e-02
  -8.9270000e-02
  -8.8670000e-02
   1.2600000e-03
  -4.4530000e-02
  -2.3390000e-02
   8.3430000e-02
   4.2390000e-02
   7.4410000e-02
   1.1666000e-01
   3.0270000e-02
   1.8700000e-02
   2.9390000e-02
  -2.5140000e-02
  -2.1820000e-02
  -3.7340000e-02
  -1.3336000e-01
  -8.6150000e-02
  -3.8250000e-02
  -6.0400000e-02
   1.9490000e-02
   4.4090000e-02
  -2.4070000e-02
   1.0420000e-02
   1.8750000e-02
   2.1930000e-02
   6.9290000e-02
   4.7320000e-02
   3.8400000e-03
   2.6840000e-02
  -5.2260000e-02
  -7.4170000e-02
  -6.1610000e-02
  -1.2429000e-01
  -2.6760000e-02
   6.4210000e-02
   2.6950000e-02
   3.9920000e-02
   4.7930000e-02
  -2.2290000e-02
   2.0430000e-02
   3.5150000e-02
  -1.3980000e-02
   6.0000000e-03
  -1.7990000e-02
  -3.2630000e-02
   1.1790000e-02
  -5.2150000e-02
  -4.5710000e-02
   3.1530000e-02
  -4.2720000e-02
  -2.8190000e-02
   3.2050000e-02
  -1.1950000e-02
   3.9500000e-03
   1.4780000e-02
  -2.0560000e-02
   1.8290000e-02
  -2.0700000e-02
  -5.1710000e-02
   5.4320000e-02
   4.0280000e-02
  -4.8260000e-02
  -1.1710000e-02
  -2.6490000e-02
   1.2100000e-03
   6.5890000e-02
   4.3920000e-02
   5.6970000e-02
   5.9580000e-02
  -1.9380000e-02
  -3.8850000e-02
  -7.4630000e-02
  -9.5610000e-02
  -6.7750000e-02
  -2.9100000e-03
   6.4790000e-02
   7.9290000e-02
   2.8710000e-02
  -4.7000000e-04
  -4.2850000e-02
  -5.8650000e-02
   3.1000000e-03
  -8.2800000e-03
  -2.3000000e-02
   5.6320000e-02
   2.5940000e-02
  -3.8500000e-02
  -3.0570000e-02
  -7.9130000e-02
  -1.0235000e-01
  -7.5700000e-03
   3.9100000e-02
   6.7720000e-02
   6.8350000e-02
  -2.2240000e-02
  -2.8210000e-02
  -5.8000000e-04
  -2.3610000e-02
   3.5180000e-02
   7.4300000e-02
   1.8120000e-02
  -5.5400000e-03
  -1.8560000e-02
  -6.4080000e-02
  -5.2730000e-02
  -4.2250000e-02
  -2.0320000e-02
   6.4620000e-02
   3.7560000e-02
  -2.8650000e-02
   6.6400000e-03
  -2.0400000e-02
  -7.2270000e-02
  -2.8930000e-02
  -3.3500000e-03
   3.1780000e-02
   9.8050000e-02
   5.7170000e-02
   2.3770000e-02
   6.3100000e-03
  -8.7300000e-02
  -6.8630000e-02
   1.0390000e-02
  -3.5400000e-03
   3.9260000e-02
   3.3860000e-02
  -5.6780000e-02
  -5.8540000e-02
  -4.2170000e-02
  -3.7430000e-02
   1.4090000e-02
   1.9600000e-02
   1.5190000e-02
   4.0300000e-02
  -1.0390000e-02
  -3.6160000e-02
  -1.5850000e-02
  -2.5000000e-04
   3.5310000e-02
   6.6740000e-02
   4.5980000e-02
  -1.5000000e-02
  -4.5080000e-02
  -9.0040000e-02
  -9.4100000e-02
  -5.6970000e-02
  -6.8460000e-02
  -3.5840000e-02
   3.9540000e-02
   2.0890000e-02
   8.8970000e-02
   1.1181000e-01
   2.2240000e-02
   5.4120000e-02
   6.7200000e-02
  -2.7860000e-02
  -6.2500000e-03
  -2.8380000e-02
  -1.0381000e-01
  -6.9920000e-02
  -6.0400000e-02
  -5.3740000e-02
  -1.2640000e-02
  -6.3300000e-03
   4.6230000e-02
   7.5320000e-02
   4.1210000e-02
   1.5130000e-02
  -1.9110000e-02
  -2.8080000e-02
  -2.8840000e-02
  -4.2170000e-02
  -2.5470000e-02
  -7.0700000e-03
   8.3400000e-03
  -3.4500000e-03
   1.5630000e-02
   5.6450000e-02
   1.2450000e-02
  -2.1250000e-02
   2.7700000e-03
  -1.5110000e-02
  -6.2270000e-02
  -3.8060000e-02
  -2.6050000e-02
   5.6800000e-03
   3.0710000e-02
  -2.7530000e-02
   2.0230000e-02
   4.5080000e-02
  -2.5750000e-02
  -2.5660000e-02
  -3.3200000e-03
  -3.5340000e-02
  -5.4600000e-03
   9.2900000e-03
   6.1660000e-02
   9.2540000e-02
