# Supplementary material for: A Novel Classification Method for Flutter Signals Based on the CNN and STFT
Source: Hindawi journal article supplement (doi:10.1155/2019/9375437), 2019-04-09
Supplement: f1 [file 9375437.f1.zip › 00_25_z18.0_28channel.txt]

   3.0900000e-02
  -4.7200000e-03
  -2.9420000e-02
   9.5220000e-02
   4.8420000e-02
   5.8980000e-02
  -5.5880000e-02
  -3.0650000e-02
   9.0500000e-03
  -8.2000000e-04
  -9.2400000e-02
  -8.6830000e-02
  -1.1900000e-02
   5.7410000e-02
   5.6020000e-02
  -2.6620000e-02
   1.0317000e-01
   2.0870000e-02
   1.5930000e-01
   4.8940000e-02
  -1.0115000e-01
  -2.6240000e-02
  -1.9850000e-02
  -2.9940000e-02
  -6.3500000e-02
  -7.4740000e-02
  -1.3930000e-02
   6.5910000e-02
   4.4230000e-02
   6.7370000e-02
   2.4980000e-02
   7.1640000e-02
   1.3761000e-01
   1.8480000e-02
   9.9300000e-03
  -1.1825000e-01
   1.6230000e-02
   6.5500000e-03
  -5.4370000e-02
  -8.1190000e-02
  -2.1740000e-02
   5.9880000e-02
   8.0750000e-02
   3.3890000e-02
  -7.4000000e-04
   1.0455000e-01
   8.5240000e-02
   2.1220000e-02
  -8.5270000e-02
  -5.0700000e-02
  -2.7140000e-02
   2.9780000e-02
  -4.8720000e-02
  -1.0419000e-01
   3.1000000e-03
   1.0734000e-01
   5.6260000e-02
  -3.8140000e-02
   7.8400000e-03
   2.7770000e-02
   1.4830000e-02
  -4.2850000e-02
  -2.6380000e-02
  -9.1060000e-02
   8.6400000e-03
   4.4880000e-02
  -1.2480000e-02
  -8.3100000e-03
   4.6090000e-02
  -2.9600000e-03
   3.8930000e-02
  -4.1100000e-03
  -1.2750000e-02
   1.1870000e-02
   6.3230000e-02
   5.8100000e-02
   2.2350000e-02
   1.8670000e-02
  -3.2460000e-02
   5.4950000e-02
  -7.6800000e-03
  -7.8940000e-02
  -1.0424000e-01
   3.5400000e-03
   3.8550000e-02
  -1.2120000e-02
  -3.3010000e-02
   5.3880000e-02
   1.2541000e-01
   8.6150000e-02
   2.9450000e-02
  -3.6410000e-02
   5.2070000e-02
  -7.9900000e-02
  -2.4240000e-02
  -8.0340000e-02
  -8.2170000e-02
   5.0500000e-02
   1.1380000e-02
   6.0810000e-02
   4.6610000e-02
   4.1130000e-02
   7.4600000e-03
   1.2127000e-01
  -6.5170000e-02
  -1.7080000e-02
  -8.2560000e-02
  -1.2060000e-02
   9.5580000e-02
  -5.2290000e-02
   1.6200000e-03
   7.9270000e-02
   1.0356000e-01
   8.3540000e-02
  -6.2380000e-02
  -3.2900000e-02
   3.4990000e-02
  -5.8020000e-02
  -5.7220000e-02
  -8.3520000e-02
  -1.8860000e-02
   8.7520000e-02
   5.5660000e-02
   7.7700000e-02
   4.3240000e-02
   6.2760000e-02
   6.4540000e-02
  -5.9520000e-02
  -3.4790000e-02
  -5.4480000e-02
  -2.4810000e-02
   4.0520000e-02
  -7.8330000e-02
   7.3840000e-02
   1.0693000e-01
   1.6480000e-02
   1.0084000e-01
  -3.4800000e-03
   1.4970000e-02
   3.4030000e-02
  -1.2505000e-01
  -3.0210000e-02
  -6.1530000e-02
  -4.9430000e-02
   1.0348000e-01
  -2.3030000e-02
  -1.6530000e-02
   1.3682000e-01
   7.8310000e-02
   9.4320000e-02
   9.9800000e-03
  -7.9950000e-02
   4.7000000e-04
  -3.3070000e-02
  -1.3682000e-01
  -7.0850000e-02
  -8.7160000e-02
   8.0140000e-02
   9.7750000e-02
   5.3850000e-02
   8.3760000e-02
   5.8920000e-02
   7.4140000e-02
  -2.1280000e-02
  -4.3210000e-02
  -1.2157000e-01
  -8.3520000e-02
  -7.9790000e-02
   3.4000000e-03
   1.2300000e-03
  -1.4310000e-02
   8.4280000e-02
   9.2920000e-02
   1.1214000e-01
   4.7520000e-02
  -2.1960000e-02
  -1.2580000e-02
   1.1900000e-02
  -7.5620000e-02
  -1.0526000e-01
  -1.5247000e-01
   4.1180000e-02
   5.9110000e-02
   2.1720000e-02
  -5.0260000e-02
   1.6942000e-01
   1.1845000e-01
   5.9170000e-02
   2.5880000e-02
  -9.3990000e-02
   7.0350000e-02
   2.6760000e-02
  -7.8660000e-02
  -1.2722000e-01
  -4.8800000e-03
   4.7570000e-02
   6.6160000e-02
  -7.6500000e-03
  -9.6320000e-02
   1.0024000e-01
   1.2270000e-01
   1.5080000e-02
  -4.2110000e-02
  -1.8510000e-02
  -6.8800000e-03
   1.1025000e-01
  -1.2722000e-01
   2.1280000e-02
  -4.3650000e-02
   7.0460000e-02
   3.5670000e-02
  -8.4450000e-02
  -8.4280000e-02
   5.3000000e-02
   4.0610000e-02
   6.3560000e-02
  -3.8710000e-02
   2.1820000e-02
   1.0041000e-01
   3.0630000e-02
   1.9770000e-02
  -8.5570000e-02
  -8.8810000e-02
   3.6580000e-02
   1.2100000e-03
  -3.8520000e-02
   2.9120000e-02
  -5.1800000e-03
   1.0745000e-01
   9.5310000e-02
  -5.9280000e-02
  -2.4290000e-02
   3.6200000e-03
  -4.2550000e-02
  -3.6880000e-02
  -1.1765000e-01
  -7.3560000e-02
   1.0679000e-01
   1.5490000e-02
   8.3100000e-02
   1.7270000e-02
   3.8740000e-02
   1.5933000e-01
  -5.1330000e-02
  -2.5660000e-02
  -1.1167000e-01
  -2.2780000e-02
  -5.4600000e-03
   1.7140000e-02
  -8.5850000e-02
   6.6630000e-02
   5.7410000e-02
   1.0973000e-01
   1.0670000e-02
  -5.1110000e-02
   1.1430000e-02
   3.0490000e-02
   6.1280000e-02
  -1.1858000e-01
  -1.5960000e-02
  -2.4700000e-03
   1.2141000e-01
  -4.4000000e-04
  -5.8920000e-02
  -2.7640000e-02
   5.4480000e-02
  -3.1300000e-03
   4.2800000e-03
  -1.0030000e-01
   6.5300000e-03
   5.5190000e-02
   1.4070000e-02
  -3.7000000e-03
  -8.8420000e-02
   8.1840000e-02
   1.1620000e-01
   3.9810000e-02
  -4.1700000e-02
   3.9020000e-02
   2.6460000e-02
   5.8760000e-02
  -5.2640000e-02
  -5.5140000e-02
  -7.5400000e-03
   7.9570000e-02
   5.4700000e-02
  -2.8210000e-02
   9.7220000e-02
   1.1100000e-02
   1.2714000e-01
  -1.9580000e-02
  -1.1990000e-01
   1.3160000e-02
  -1.5000000e-02
  -7.6390000e-02
  -2.5690000e-02
  -6.2920000e-02
   6.4350000e-02
   1.0718000e-01
   2.9170000e-02
   4.1540000e-02
   6.1400000e-03
   2.7720000e-02
   1.8100000e-03
  -7.6770000e-02
  -1.3295000e-01
  -1.5600000e-02
   2.9470000e-02
  -1.6670000e-02
  -3.9040000e-02
   1.6590000e-02
   4.9190000e-02
   1.1867000e-01
  -1.8970000e-02
   4.1620000e-02
   2.2670000e-02
   2.1800000e-02
   4.3650000e-02
  -1.2596000e-01
  -7.6000000e-02
  -5.0260000e-02
  -6.6710000e-02
  -9.8400000e-03
  -6.1220000e-02
  -6.6100000e-03
   1.0726000e-01
   2.9060000e-02
   1.2297000e-01
   1.9910000e-02
   3.7040000e-02
   2.7500000e-02
  -4.9600000e-03
  -1.1198000e-01
  -4.9490000e-02
  -1.2667000e-01
   6.7750000e-02
   3.4270000e-02
   1.3300000e-02
   6.1940000e-02
   6.6460000e-02
   1.6155000e-01
   2.6650000e-02
  -5.3930000e-02
  -1.0450000e-02
   3.7890000e-02
  -9.6130000e-02
  -1.8100000e-03
  -1.0455000e-01
   3.2550000e-02
   1.4989000e-01
  -2.7690000e-02
   7.4030000e-02
   3.0540000e-02
  -5.1800000e-03
   9.9170000e-02
  -3.8630000e-02
  -9.3990000e-02
   2.2700000e-02
  -5.7110000e-02
   1.0402000e-01
  -6.0300000e-03
  -2.3740000e-02
   9.4180000e-02
  -3.0980000e-02
   1.2370000e-02
  -1.2150000e-02
  -1.8735000e-01
   2.0480000e-02
   2.2950000e-02
  -4.8450000e-02
   1.1993000e-01
  -2.3600000e-03
   1.6067000e-01
   1.2330000e-01
  -2.2510000e-02
   3.7320000e-02
  -1.2124000e-01
  -7.1750000e-02
  -6.0210000e-02
  -1.8307000e-01
   2.2570000e-02
  -6.3900000e-03
   7.0190000e-02
   1.3284000e-01
   2.5200000e-02
   5.5800000e-02
   2.5420000e-02
  -1.6180000e-02
   9.6800000e-03
  -8.5460000e-02
  -1.0334000e-01
   1.4280000e-02
  -6.6210000e-02
   5.4070000e-02
  -5.8920000e-02
   7.3950000e-02
   1.1022000e-01
   8.5000000e-04
   7.1070000e-02
   2.8730000e-02
  -8.1190000e-02
   1.0250000e-02
  -5.3740000e-02
  -1.2357000e-01
   9.9000000e-04
  -1.2310000e-02
   1.4700000e-02
   4.9900000e-02
   2.1960000e-02
   3.5620000e-02
   1.6860000e-02
   7.1670000e-02
  -2.9530000e-02
  -2.5610000e-02
   3.6660000e-02
   2.9970000e-02
  -5.4670000e-02
   4.6470000e-02
  -5.7250000e-02
  -3.2490000e-02
   1.7410000e-02
  -1.6070000e-02
   2.7310000e-02
   7.4910000e-02
   1.3820000e-02
   8.7900000e-02
   2.5120000e-02
  -6.1280000e-02
  -1.0250000e-02
  -1.4200000e-02
  -2.5360000e-02
   4.1100000e-03
  -2.4070000e-02
   4.5950000e-02
   7.8200000e-02
   2.2590000e-02
   6.1120000e-02
   1.0780000e-02
   3.1260000e-02
   9.0200000e-03
  -5.1380000e-02
  -4.8060000e-02
  -1.3130000e-02
  -2.6900000e-02
   1.2310000e-02
   2.7170000e-02
  -2.3420000e-02
   1.0337000e-01
   5.8730000e-02
  -1.5710000e-02
   3.1260000e-02
   2.9720000e-02
  -2.4510000e-02
   1.8180000e-02
  -9.3390000e-02
   3.7400000e-02
   3.3260000e-02
  -7.9180000e-02
   1.9740000e-02
   2.5120000e-02
   1.2340000e-02
   1.7360000e-02
  -1.5900000e-03
   1.1240000e-02
   1.6260000e-02
  -3.5700000e-02
  -1.4920000e-02
  -5.8920000e-02
  -3.2240000e-02
   3.0820000e-02
   1.6150000e-02
  -7.2580000e-02
   7.1510000e-02
  -3.6200000e-03
  -2.9860000e-02
   7.2300000e-02
  -1.1568000e-01
   8.3100000e-02
   2.6350000e-02
  -9.8680000e-02
   2.7750000e-02
   5.5030000e-02
  -5.0670000e-02
   1.6418000e-01
  -6.4380000e-02
   4.7080000e-02
   1.4203000e-01
  -1.1801000e-01
   7.5810000e-02
  -6.3800000e-02
  -4.0830000e-02
   2.7940000e-02
  -9.2970000e-02
   1.3490000e-02
   6.4460000e-02
   2.0600000e-03
   1.6094000e-01
   1.5600000e-02
   5.9000000e-02
   7.9020000e-02
  -7.1420000e-02
   5.1080000e-02
  -3.2190000e-02
  -1.1266000e-01
   1.2280000e-02
  -1.5406000e-01
   4.8780000e-02
   2.4950000e-02
  -9.4600000e-03
   1.0811000e-01
   2.5960000e-02
   5.2670000e-02
   5.4320000e-02
  -5.0830000e-02
  -7.0500000e-03
  -1.7190000e-02
  -1.0646000e-01
   2.5910000e-02
  -5.1300000e-02
   3.7120000e-02
   8.9850000e-02
   2.0210000e-02
   1.1697000e-01
   8.0250000e-02
  -6.2730000e-02
   3.5730000e-02
  -1.2919000e-01
  -3.0460000e-02
  -1.3790000e-02
  -1.0372000e-01
   9.6240000e-02
   1.0230000e-02
   1.4970000e-02
   4.6970000e-02
  -1.5190000e-02
   5.7880000e-02
  -3.1040000e-02
  -9.6370000e-02
   4.0390000e-02
  -1.2026000e-01
  -9.4600000e-03
   4.4910000e-02
  -7.1180000e-02
   7.9290000e-02
   7.2000000e-02
   8.2090000e-02
   8.0880000e-02
  -5.0810000e-02
  -1.2830000e-02
  -3.5620000e-02
  -1.0836000e-01
   2.2100000e-02
  -8.9770000e-02
   2.2700000e-02
   8.6940000e-02
   2.0670000e-02
   1.2867000e-01
   3.0650000e-02
   4.4390000e-02
   7.0330000e-02
   2.6900000e-03
  -4.5380000e-02
  -5.8620000e-02
  -4.3210000e-02
   2.3990000e-02
  -6.7060000e-02
  -1.5570000e-02
   5.6070000e-02
   6.0270000e-02
   1.6290000e-02
   7.0110000e-02
   6.1700000e-03
   5.1350000e-02
  -2.9500000e-02
  -6.2070000e-02
  -4.3000000e-03
  -4.5270000e-02
   1.9770000e-02
   4.0600000e-03
   3.1420000e-02
   2.9530000e-02
   6.4820000e-02
   2.8790000e-02
   4.3590000e-02
  -4.2800000e-02
   3.8770000e-02
  -5.6320000e-02
  -3.4190000e-02
   3.1860000e-02
  -5.1440000e-02
   3.7010000e-02
   2.3390000e-02
   1.0310000e-02
   7.6500000e-03
   2.0040000e-02
   8.8000000e-03
  -3.9200000e-03
  -4.1540000e-02
   2.2980000e-02
  -5.1500000e-03
  -3.1010000e-02
   8.6830000e-02
  -8.4400000e-03
   3.3450000e-02
   7.5780000e-02
  -1.7140000e-02
   1.4810000e-02
  -3.5290000e-02
  -6.2840000e-02
   1.2970000e-02
  -5.7410000e-02
  -1.7990000e-02
  -2.5860000e-02
   2.0320000e-02
   1.1570000e-01
   6.3250000e-02
   1.2580000e-02
   6.1550000e-02
   3.9070000e-02
   2.6600000e-03
  -4.8640000e-02
  -1.3734000e-01
  -2.2800000e-03
  -6.3310000e-02
  -7.6140000e-02
  -2.7690000e-02
  -2.8000000e-03
   2.9170000e-02
   7.7180000e-02
   1.1520000e-02
   5.6780000e-02
   7.1120000e-02
   8.1400000e-03
  -3.8100000e-03
   3.1260000e-02
  -7.0770000e-02
  -5.8000000e-04
  -3.9240000e-02
   1.3760000e-02
   7.6140000e-02
   3.5070000e-02
  -9.2900000e-03
   4.8090000e-02
   1.8750000e-02
   4.8530000e-02
  -1.0243000e-01
  -1.4810000e-02
   3.8140000e-02
  -5.2120000e-02
   3.1530000e-02
   2.3090000e-02
   5.9000000e-02
   7.0250000e-02
   2.3280000e-02
  -8.2090000e-02
   4.1000000e-04
  -4.6530000e-02
   7.2100000e-03
  -3.3810000e-02
   4.1000000e-04
   2.5960000e-02
   1.1595000e-01
   3.3940000e-02
   7.1340000e-02
  -4.1000000e-04
  -4.9600000e-03
   6.7090000e-02
  -1.1167000e-01
  -3.7670000e-02
  -8.5430000e-02
   4.9540000e-02
   1.1760000e-02
   1.5000000e-02
   3.3310000e-02
   1.0679000e-01
   7.1730000e-02
   9.6000000e-04
  -4.0280000e-02
  -2.5440000e-02
   1.0400000e-03
  -5.4560000e-02
   3.0490000e-02
  -4.1510000e-02
  -1.0230000e-02
   2.4320000e-02
   3.1800000e-03
  -2.2070000e-02
   6.4900000e-02
  -1.4560000e-02
   4.2500000e-02
   4.8970000e-02
  -7.5650000e-02
   1.9630000e-02
  -3.7340000e-02
  -7.7130000e-02
   1.0560000e-02
  -4.1240000e-02
   3.0050000e-02
   1.5630000e-02
  -1.7900000e-02
   9.5420000e-02
  -3.6490000e-02
  -1.5520000e-02
  -2.3300000e-03
  -3.0570000e-02
   3.5780000e-02
  -2.9340000e-02
  -1.1800000e-03
   9.3110000e-02
  -3.2410000e-02
   8.1430000e-02
   2.6810000e-02
  -4.3650000e-02
   9.2950000e-02
  -2.7580000e-02
  -3.0130000e-02
  -4.6420000e-02
  -1.0860000e-01
   6.3500000e-02
  -5.5030000e-02
  -7.1340000e-02
   1.6478000e-01
   3.0900000e-02
   1.0098000e-01
   1.2418000e-01
  -2.7750000e-02
   1.3355000e-01
   2.1060000e-02
  -9.6920000e-02
   2.1740000e-02
  -1.4403000e-01
  -4.0880000e-02
   8.5800000e-03
  -6.9590000e-02
   6.3420000e-02
   8.0010000e-02
   3.0540000e-02
   1.0792000e-01
   6.0950000e-02
   8.3100000e-03
   6.8440000e-02
  -6.7390000e-02
  -5.3160000e-02
  -3.7100000e-02
  -8.4060000e-02
  -6.0050000e-02
  -5.1680000e-02
  -2.9780000e-02
   7.4990000e-02
   1.0808000e-01
   7.0000000e-02
   7.6610000e-02
  -3.8470000e-02
   9.5200000e-02
  -3.1610000e-02
  -7.0490000e-02
  -3.2080000e-02
  -1.1913000e-01
  -3.2380000e-02
  -3.3150000e-02
  -2.7860000e-02
   6.2840000e-02
   8.3430000e-02
   7.9400000e-02
   1.1595000e-01
  -1.3630000e-02
  -5.1800000e-03
  -5.5000000e-02
  -6.3970000e-02
  -8.6940000e-02
  -1.5083000e-01
  -3.3420000e-02
  -4.3870000e-02
  -2.9040000e-02
   1.1527000e-01
  -6.6000000e-04
   2.9530000e-02
   1.2407000e-01
   7.6960000e-02
   5.8150000e-02
  -1.0800000e-02
  -8.5380000e-02
   1.2102000e-01
  -6.5060000e-02
  -1.0169000e-01
  -6.4760000e-02
  -5.5700000e-03
   7.3750000e-02
   4.0960000e-02
  -9.4540000e-02
   1.2078000e-01
   1.2910000e-02
   3.4710000e-02
   1.7710000e-02
  -1.4244000e-01
   8.1100000e-02
   5.8400000e-02
   8.4400000e-03
  -5.0700000e-03
  -2.7560000e-02
   1.3542000e-01
   1.1160000e-02
  -2.1740000e-02
  -2.4400000e-03
  -3.9040000e-02
  -2.8460000e-02
  -4.8910000e-02
  -6.3230000e-02
   2.4920000e-02
   5.6070000e-02
   7.7320000e-02
   1.0169000e-01
  -4.8500000e-03
   6.9370000e-02
  -4.0720000e-02
   2.3300000e-03
  -3.3230000e-02
  -4.9520000e-02
  -1.7550000e-02
   2.8080000e-02
  -9.3500000e-03
   1.4866000e-01
   3.5200000e-02
   6.5560000e-02
   3.5560000e-02
  -7.5100000e-02
  -1.9060000e-02
  -1.0060000e-02
  -1.2892000e-01
  -2.7140000e-02
  -3.3670000e-02
   2.3090000e-02
   1.2152000e-01
   1.5880000e-02
   3.9980000e-02
   1.7295000e-01
   9.1270000e-02
   4.7760000e-02
  -2.9560000e-02
  -9.8130000e-02
   4.7200000e-03
  -1.0863000e-01
  -1.2412000e-01
  -1.0572000e-01
  -7.0460000e-02
   4.2770000e-02
   2.1080000e-02
  -1.5600000e-03
   6.6930000e-02
   9.6760000e-02
   3.0520000e-02
   3.8850000e-02
   2.7200000e-02
  -4.4690000e-02
  -5.7900000e-03
  -1.1617000e-01
  -5.3440000e-02
  -2.7060000e-02
  -3.1860000e-02
   7.6990000e-02
   2.8540000e-02
   9.5700000e-03
   2.0890000e-02
   1.3520000e-02
   1.1710000e-02
  -1.8920000e-02
  -6.4870000e-02
  -4.5320000e-02
  -2.8950000e-02
   4.2200000e-03
   2.9830000e-02
  -4.9220000e-02
   1.7265000e-01
   8.1490000e-02
   1.9990000e-02
   2.7140000e-02
   6.4380000e-02
   8.0600000e-03
  -3.4740000e-02
  -9.6840000e-02
  -6.7700000e-02
   2.2540000e-02
  -3.5810000e-02
   7.5260000e-02
   3.8770000e-02
   1.0230000e-01
   1.2952000e-01
   9.7610000e-02
  -3.3120000e-02
   4.4530000e-02
  -2.2150000e-02
  -5.0480000e-02
  -3.5310000e-02
  -3.8000000e-04
  -1.5820000e-02
   1.7680000e-02
   5.9390000e-02
   6.3340000e-02
   5.9420000e-02
   1.5570000e-02
   5.2810000e-02
  -6.7200000e-03
  -3.7650000e-02
  -3.3230000e-02
  -4.6140000e-02
  -2.2210000e-02
   4.0600000e-03
  -5.4300000e-03
   7.7070000e-02
   4.3290000e-02
   1.1950000e-02
   5.3930000e-02
   7.0700000e-03
   5.1880000e-02
  -5.3900000e-02
  -8.8090000e-02
  -1.5130000e-02
  -3.3180000e-02
  -2.4790000e-02
  -1.8810000e-02
  -7.9100000e-02
   1.1496000e-01
   4.0630000e-02
  -2.2510000e-02
  -6.6570000e-02
   1.9600000e-02
   2.9940000e-02
   4.1900000e-03
  -1.1631000e-01
  -7.0200000e-03
   8.9520000e-02
   5.3790000e-02
   5.2560000e-02
  -4.3210000e-02
   3.9590000e-02
   3.3340000e-02
  -3.9700000e-02
  -1.1233000e-01
  -6.4790000e-02
  -2.7120000e-02
   7.9760000e-02
  -2.7750000e-02
  -9.9800000e-03
   2.7170000e-02
   1.2037000e-01
   1.8625000e-01
   4.3070000e-02
  -1.3930000e-02
  -5.6780000e-02
   1.2670000e-02
  -5.6400000e-02
  -1.4301000e-01
  -2.2115000e-01
   1.0940000e-02
   2.7580000e-02
   3.8300000e-02
   1.3200000e-03
   7.1230000e-02
   1.5590000e-01
   1.9034000e-01
   5.5660000e-02
  -2.0780000e-02
  -3.9480000e-02
  -2.9340000e-02
  -6.5470000e-02
  -1.2108000e-01
  -9.7880000e-02
   5.9800000e-03
   1.2966000e-01
   7.8880000e-02
   6.2180000e-02
   4.1700000e-02
   1.6626000e-01
  -1.3650000e-02
  -1.2060000e-02
  -1.0463000e-01
  -1.1258000e-01
  -2.7170000e-02
  -2.8380000e-02
  -2.4570000e-02
  -2.7000000e-04
   5.1680000e-02
   9.7280000e-02
   9.0620000e-02
   1.2100000e-03
   5.4320000e-02
  -1.3700000e-03
  -2.1700000e-03
  -5.3660000e-02
  -1.6059000e-01
  -4.8260000e-02
  -4.5290000e-02
  -1.7770000e-02
   7.8420000e-02
  -4.2060000e-02
   1.1028000e-01
   9.6570000e-02
   6.7150000e-02
   4.6340000e-02
  -1.4720000e-02
  -7.1700000e-02
   8.7030000e-02
  -6.2160000e-02
  -7.3800000e-03
  -2.6020000e-02
   9.5700000e-03
   1.1332000e-01
  -4.9820000e-02
  -1.2010000e-02
   3.9070000e-02
  -3.6880000e-02
   1.5770000e-02
  -2.8790000e-02
  -1.1269000e-01
   6.5310000e-02
   3.3090000e-02
   1.6940000e-02
   5.2940000e-02
  -4.1980000e-02
   1.0082000e-01
   7.7700000e-02
  -4.6040000e-02
  -7.8170000e-02
  -9.3190000e-02
   6.2500000e-03
  -4.2500000e-03
  -8.0440000e-02
  -4.1510000e-02
   8.4150000e-02
   9.4100000e-02
   9.9200000e-02
  -3.2630000e-02
   4.2440000e-02
   4.0580000e-02
   1.5790000e-02
  -4.6280000e-02
  -5.8480000e-02
   1.7000000e-02
   5.8260000e-02
   3.6690000e-02
  -4.4910000e-02
   1.7790000e-02
   8.8800000e-03
   7.9100000e-02
   7.2100000e-03
  -7.2080000e-02
  -1.6200000e-02
   2.1250000e-02
   6.3230000e-02
  -9.7900000e-03
  -9.4600000e-03
   2.8500000e-03
   9.0400000e-02
  -1.0780000e-02
   2.5660000e-02
  -6.6820000e-02
  -1.8750000e-02
   1.7110000e-02
  -3.0680000e-02
  -6.3010000e-02
   1.0800000e-02
   1.5160000e-02
   1.0764000e-01
   1.4010000e-02
  -7.0080000e-02
   3.5780000e-02
   3.6770000e-02
   6.0700000e-02
   5.5170000e-02
  -3.5100000e-02
   2.2020000e-02
   6.8710000e-02
  -2.8870000e-02
   2.4270000e-02
  -1.1373000e-01
  -4.5000000e-03
  -1.2170000e-02
  -3.5590000e-02
  -6.0400000e-02
   8.2800000e-03
   1.0860000e-02
   6.6350000e-02
   2.3000000e-02
  -2.0840000e-02
   2.9890000e-02
   2.2730000e-02
   3.0320000e-02
  -9.0800000e-03
  -6.7230000e-02
   8.0100000e-03
  -2.1660000e-02
  -1.0583000e-01
   6.2620000e-02
  -5.8370000e-02
   1.2300000e-03
   7.3510000e-02
   4.8860000e-02
   4.7130000e-02
   5.2750000e-02
  -3.5970000e-02
   7.1840000e-02
  -3.1500000e-02
  -5.1550000e-02
   2.7360000e-02
  -4.0770000e-02
   6.8240000e-02
   2.3910000e-02
  -1.3330000e-02
   4.6970000e-02
   3.0000000e-02
   2.7310000e-02
   5.3200000e-03
  -8.8010000e-02
   8.0580000e-02
  -5.2890000e-02
  -6.0070000e-02
   6.0210000e-02
  -1.5600000e-03
   3.8030000e-02
   1.0424000e-01
  -7.0630000e-02
   7.0380000e-02
   9.1330000e-02
  -9.7970000e-02
   6.3340000e-02
  -4.7350000e-02
   7.5100000e-03
   1.9300000e-02
  -6.6110000e-02
   2.5250000e-02
   3.1700000e-02
  -1.7050000e-02
   2.6790000e-02
  -2.5830000e-02
  -2.3000000e-02
   8.8940000e-02
  -6.8550000e-02
   3.3370000e-02
   1.9000000e-02
  -5.7690000e-02
   6.1390000e-02
  -3.6110000e-02
  -4.1590000e-02
   1.3270000e-02
  -1.1600000e-02
   3.4030000e-02
   4.5050000e-02
  -1.0095000e-01
   1.3605000e-01
   7.4000000e-04
  -6.8500000e-03
  -6.1120000e-02
  -1.4780000e-02
   6.8240000e-02
   3.2550000e-02
  -7.3260000e-02
   1.3680000e-02
   4.6060000e-02
   6.5530000e-02
   3.8390000e-02
  -7.0660000e-02
   2.9470000e-02
  -1.8100000e-02
   1.0057000e-01
  -4.7320000e-02
  -9.1300000e-02
  -5.0120000e-02
  -7.0700000e-03
   1.7930000e-02
   2.0800000e-03
  -8.2830000e-02
   5.3270000e-02
   1.1746000e-01
   6.5450000e-02
   8.0300000e-03
  -5.0200000e-02
   3.7040000e-02
   8.3270000e-02
   2.3090000e-02
  -1.3531000e-01
  -1.6810000e-02
  -8.6600000e-03
   9.0530000e-02
  -3.0130000e-02
  -6.7860000e-02
   5.5000000e-02
   8.9960000e-02
   2.4540000e-02
   1.8640000e-02
  -1.0586000e-01
  -4.9710000e-02
   9.4150000e-02
  -4.8750000e-02
  -1.5630000e-02
   4.5400000e-02
   6.8550000e-02
   2.0314000e-01
   5.1600000e-02
  -9.3200000e-03
  -1.7550000e-02
  -3.8660000e-02
  -1.9930000e-02
  -1.3506000e-01
  -1.4863000e-01
  -4.5200000e-03
  -3.2870000e-02
   8.3650000e-02
   3.4380000e-02
  -3.0960000e-02
   1.7188000e-01
   8.1190000e-02
   4.5510000e-02
  -3.0410000e-02
  -9.1470000e-02
   3.5840000e-02
   5.1000000e-03
  -7.2470000e-02
  -3.6360000e-02
  -2.2590000e-02
   8.3650000e-02
   1.1735000e-01
  -6.4320000e-02
  -6.9000000e-04
  -1.8230000e-02
   8.0600000e-03
   7.0570000e-02
  -1.4932000e-01
  -5.3820000e-02
   4.0610000e-02
   7.0270000e-02
   1.1817000e-01
  -2.1000000e-02
  -1.6810000e-02
   8.4530000e-02
  -1.5600000e-02
  -1.8860000e-02
  -1.0361000e-01
  -9.7800000e-02
   2.9560000e-02
  -3.0650000e-02
  -3.1610000e-02
  -3.8080000e-02
   2.3830000e-02
   8.7460000e-02
   7.7150000e-02
  -2.4730000e-02
   3.1890000e-02
   2.8900000e-02
   9.8180000e-02
  -9.7300000e-03
  -7.3230000e-02
  -6.4980000e-02
   3.7100000e-02
  -8.3400000e-03
  -5.9140000e-02
  -9.0810000e-02
   4.3900000e-02
   2.6270000e-02
   1.2769000e-01
  -3.5590000e-02
  -1.8100000e-03
   9.1690000e-02
   3.8690000e-02
   2.7310000e-02
  -9.0120000e-02
  -1.3650000e-02
   7.0820000e-02
   5.3790000e-02
  -6.3360000e-02
   2.0180000e-02
   2.0430000e-02
   9.0320000e-02
   2.1300000e-02
  -2.1410000e-02
  -6.3580000e-02
   1.8400000e-02
  -1.5710000e-02
  -6.2490000e-02
   1.4700000e-02
  -7.4850000e-02
   1.1921000e-01
   4.7020000e-02
   1.1600000e-02
   2.8870000e-02
   5.1030000e-02
   3.9260000e-02
   8.5110000e-02
  -9.8050000e-02
   2.1220000e-02
  -2.9390000e-02
  -1.7880000e-02
   8.4010000e-02
  -1.0221000e-01
   5.0400000e-03
   2.9390000e-02
  -2.5420000e-02
   2.5250000e-02
  -4.2550000e-02
  -2.7450000e-02
   9.6050000e-02
  -7.7590000e-02
   2.7910000e-02
  -1.8700000e-02
  -3.1450000e-02
   1.1148000e-01
   6.7200000e-03
   1.9440000e-02
   7.1180000e-02
  -7.1300000e-03
   5.4750000e-02
   1.2120000e-02
  -7.1420000e-02
  -3.5180000e-02
  -1.3849000e-01
   1.0890000e-02
   5.4800000e-03
  -9.1990000e-02
   2.0920000e-02
   8.1240000e-02
   4.9110000e-02
   1.1845000e-01
  -5.5820000e-02
   2.1630000e-02
   4.9900000e-02
  -6.0290000e-02
   4.8000000e-03
  -4.3460000e-02
   8.8000000e-04
   9.9170000e-02
  -3.2020000e-02
   2.1500000e-02
   3.2790000e-02
   3.2630000e-02
   5.2340000e-02
  -1.2497000e-01
  -8.8260000e-02
   8.0300000e-03
  -3.9870000e-02
   3.3810000e-02
   1.6890000e-02
   2.5200000e-02
   1.6681000e-01
   7.3230000e-02
   1.8150000e-02
   8.2500000e-02
  -8.1100000e-02
   6.6710000e-02
  -6.6350000e-02
  -1.4820000e-01
  -7.8720000e-02
   3.3420000e-02
   3.7700000e-02
   1.9170000e-02
  -3.3670000e-02
   6.2290000e-02
   1.4159000e-01
   2.5720000e-02
   4.6890000e-02
  -6.8020000e-02
  -2.1990000e-02
   1.2230000e-02
  -2.3440000e-02
  -7.8090000e-02
   7.1750000e-02
  -6.6600000e-03
   5.9940000e-02
   7.2190000e-02
  -3.0900000e-02
  -7.4300000e-03
   3.8880000e-02
   2.2260000e-02
  -5.1500000e-03
  -7.7130000e-02
  -6.5340000e-02
   3.6520000e-02
   4.4100000e-03
  -2.3200000e-02
  -2.2650000e-02
   1.1773000e-01
   7.5400000e-02
   1.0989000e-01
  -5.7990000e-02
  -2.7450000e-02
   3.0160000e-02
  -4.0740000e-02
   5.1300000e-03
  -1.3846000e-01
  -5.3880000e-02
   3.8220000e-02
   5.8730000e-02
  -4.8000000e-03
   1.7490000e-02
   2.3550000e-02
   9.3580000e-02
   2.7310000e-02
  -5.9960000e-02
  -5.1630000e-02
  -1.0189000e-01
   1.0610000e-02
   2.3990000e-02
   3.7800000e-03
   1.7440000e-02
   6.1060000e-02
   1.3237000e-01
   5.6230000e-02
  -5.1000000e-03
  -4.2720000e-02
  -2.5660000e-02
  -6.0900000e-03
  -3.8080000e-02
  -1.9437000e-01
   2.1820000e-02
   5.9800000e-02
   1.0479000e-01
   6.1440000e-02
  -5.2860000e-02
   1.4619000e-01
   6.7610000e-02
   7.7950000e-02
  -8.7550000e-02
  -6.3560000e-02
   1.4230000e-02
   3.0870000e-02
  -1.0800000e-01
  -8.7880000e-02
   2.3300000e-03
   7.4800000e-02
   8.6090000e-02
  -4.3130000e-02
   8.7200000e-03
   8.9140000e-02
   1.3835000e-01
   6.7400000e-03
  -1.2327000e-01
  -3.2160000e-02
   2.9670000e-02
   1.3850000e-02
  -6.1090000e-02
  -7.9760000e-02
   4.2830000e-02
   1.0940000e-01
   6.9560000e-02
  -4.6890000e-02
  -5.2290000e-02
   7.2000000e-02
   5.0090000e-02
   2.2980000e-02
  -9.3110000e-02
  -6.3230000e-02
   1.0136000e-01
   8.3820000e-02
  -1.0301000e-01
  -9.2100000e-02
   8.8600000e-03
   5.3300000e-02
   1.0640000e-02
  -8.6500000e-02
  -6.5390000e-02
   1.1003000e-01
   8.4720000e-02
   2.9500000e-02
  -2.2320000e-02
  -2.5440000e-02
   1.2497000e-01
   9.0800000e-03
  -4.4550000e-02
  -1.4745000e-01
  -3.9400000e-02
   1.8420000e-02
   7.0200000e-03
  -8.4560000e-02
  -5.4290000e-02
   8.7680000e-02
   1.4554000e-01
   2.6600000e-03
  -6.6350000e-02
   1.2626000e-01
   3.6550000e-02
   4.4200000e-02
  -1.3824000e-01
  -8.9880000e-02
  -5.0420000e-02
   6.1700000e-03
  -7.1590000e-02
  -7.2820000e-02
   1.7000000e-02
   1.3945000e-01
   8.8200000e-02
   5.9880000e-02
   1.5190000e-02
   8.8590000e-02
   7.2160000e-02
  -2.9010000e-02
  -9.6290000e-02
  -1.0934000e-01
  -2.5880000e-02
   1.4920000e-02
  -4.2990000e-02
  -5.8320000e-02
   4.8720000e-02
   8.6150000e-02
   8.2690000e-02
   5.1680000e-02
   1.5570000e-02
   1.0540000e-01
   5.0890000e-02
  -6.0510000e-02
  -9.5800000e-02
  -1.1165000e-01
  -1.2500000e-02
   1.5960000e-02
  -1.2040000e-02
  -3.6300000e-02
   8.5160000e-02
   1.0707000e-01
   7.8090000e-02
  -3.4330000e-02
   2.1850000e-02
  -3.3860000e-02
   2.7340000e-02
  -7.2710000e-02
  -7.4800000e-02
   1.8920000e-02
   4.0910000e-02
   1.8340000e-02
  -4.0220000e-02
   3.0520000e-02
   8.0420000e-02
   3.0300000e-02
  -2.3940000e-02
  -1.3270000e-02
   2.6240000e-02
   3.1700000e-02
  -3.6520000e-02
  -1.4090000e-02
   3.9780000e-02
   5.9550000e-02
  -2.2200000e-03
  -3.1340000e-02
  -1.2280000e-02
  -4.5570000e-02
   8.2530000e-02
   2.0600000e-03
  -9.8100000e-02
   2.2840000e-02
   1.4780000e-02
   7.3040000e-02
   4.6910000e-02
  -7.5590000e-02
  -4.8120000e-02
   5.0750000e-02
  -2.6320000e-02
  -3.7070000e-02
  -7.7290000e-02
   6.8300000e-02
   1.6415000e-01
   8.2780000e-02
   8.2500000e-03
  -1.1570000e-02
   5.1520000e-02
  -1.2170000e-02
  -8.1460000e-02
  -8.9080000e-02
  -1.1359000e-01
   8.3680000e-02
   2.2760000e-02
  -4.1020000e-02
   1.3200000e-03
   1.4390000e-02
   1.4937000e-01
   2.0400000e-02
  -4.6360000e-02
   6.0600000e-03
   2.2480000e-02
   1.1900000e-02
   2.1400000e-03
  -1.2286000e-01
   4.4660000e-02
   9.6100000e-02
   6.0130000e-02
   2.4370000e-02
  -8.2090000e-02
   1.2519000e-01
   1.2670000e-02
   1.1950000e-02
  -8.3680000e-02
  -1.5713000e-01
   5.5300000e-02
   2.9860000e-02
  -2.4460000e-02
   3.1000000e-03
   2.7250000e-02
   1.3778000e-01
   1.4512000e-01
  -3.9240000e-02
   1.5330000e-02
  -3.2680000e-02
   4.8830000e-02
  -1.5710000e-02
  -1.4666000e-01
  -8.2250000e-02
   4.3180000e-02
   2.3520000e-02
   8.9880000e-02
  -8.9900000e-02
   4.9270000e-02
   1.5157000e-01
   2.8510000e-02
  -2.5720000e-02
  -7.3290000e-02
  -2.8080000e-02
   5.2530000e-02
  -4.3980000e-02
  -7.7980000e-02
  -8.9900000e-03
  -4.4200000e-02
   1.3369000e-01
   3.5340000e-02
  -2.0540000e-02
   1.1252000e-01
  -4.9760000e-02
   1.2382000e-01
  -4.1260000e-02
  -1.3347000e-01
   1.5600000e-03
   6.8500000e-03
   3.0000000e-02
   7.6660000e-02
  -6.7340000e-02
   9.3520000e-02
   6.6520000e-02
   2.9600000e-03
   4.8720000e-02
  -1.6440000e-01
   2.0120000e-02
   4.2220000e-02
  -8.9700000e-03
  -6.7670000e-02
   1.0170000e-02
   5.5700000e-03
   8.1600000e-02
  -5.6200000e-03
  -3.2870000e-02
  -3.7010000e-02
   1.0309000e-01
   3.0350000e-02
  -2.7560000e-02
  -1.5380000e-02
  -2.1930000e-02
   9.1250000e-02
  -1.1160000e-02
  -5.6890000e-02
  -6.5750000e-02
   2.3880000e-02
  -1.7710000e-02
   6.5170000e-02
  -1.2969000e-01
   1.5130000e-02
   6.8240000e-02
   5.3080000e-02
   1.2480000e-02
  -3.2680000e-02
   2.9360000e-02
   1.0079000e-01
   3.9870000e-02
  -8.9660000e-02
   3.3610000e-02
  -4.7080000e-02
   7.0220000e-02
  -5.5360000e-02
  -4.2330000e-02
  -3.1590000e-02
   3.1500000e-02
   4.6200000e-02
   3.5100000e-02
   1.3240000e-02
   2.0100000e-02
   6.4300000e-02
  -9.1900000e-03
  -4.3300000e-03
  -7.3070000e-02
  -1.7520000e-02
  -1.6040000e-02
   1.1500000e-03
   1.6920000e-02
   9.6500000e-03
   3.9100000e-02
   7.1970000e-02
   8.1730000e-02
  -1.0530000e-02
   1.1430000e-02
  -2.6840000e-02
  -8.0640000e-02
  -4.0470000e-02
  -5.1350000e-02
  -6.2950000e-02
   7.6850000e-02
   5.7910000e-02
   6.8350000e-02
   9.3850000e-02
   1.3350000e-02
   8.4310000e-02
  -8.4700000e-03
  -2.0950000e-02
  -7.5980000e-02
  -5.5250000e-02
  -7.3950000e-02
  -7.4000000e-03
  -2.6620000e-02
   2.9090000e-02
   7.4800000e-02
   7.6060000e-02
   1.1721000e-01
  -2.2730000e-02
  -2.6920000e-02
  -4.8390000e-02
  -1.0610000e-02
  -1.1686000e-01
  -8.5130000e-02
  -3.3370000e-02
   6.5830000e-02
   8.0770000e-02
   7.4900000e-03
   5.2260000e-02
   1.2563000e-01
   3.1860000e-02
   3.2350000e-02
  -7.6220000e-02
  -4.1810000e-02
  -3.8410000e-02
  -4.7380000e-02
  -2.9830000e-02
  -4.9850000e-02
   1.9300000e-02
   1.3660000e-01
   2.2570000e-02
   7.1920000e-02
   3.1590000e-02
  -1.9250000e-02
   9.0290000e-02
  -4.8780000e-02
  -8.0010000e-02
  -1.3240000e-02
  -2.0210000e-02
  -2.8490000e-02
  -2.6920000e-02
  -1.3700000e-03
   1.2377000e-01
   5.7110000e-02
   1.6890000e-02
   1.5160000e-02
   7.0200000e-03
   5.6430000e-02
  -2.5200000e-03
  -9.8380000e-02
   4.0770000e-02
   3.7340000e-02
   9.0800000e-03
  -2.7860000e-02
  -7.1100000e-02
   1.0649000e-01
   2.8490000e-02
  -3.9500000e-03
  -1.0062000e-01
   1.4480000e-02
   1.2260000e-02
   9.4020000e-02
  -9.1930000e-02
   2.3910000e-02
   7.3700000e-02
   1.9690000e-02
   1.2090000e-02
  -6.9290000e-02
  -1.2390000e-02
   3.0930000e-02
   3.5230000e-02
  -9.4920000e-02
   6.0870000e-02
   6.4400000e-03
   5.3360000e-02
   1.3410000e-02
  -5.0010000e-02
  -6.7090000e-02
   2.7610000e-02
  -5.7550000e-02
   1.6230000e-02
  -7.0520000e-02
   2.3000000e-02
   1.2582000e-01
   2.4240000e-02
   4.2060000e-02
  -1.1145000e-01
   8.8420000e-02
   4.2310000e-02
  -1.4720000e-02
  -1.1387000e-01
   2.0100000e-02
   2.3690000e-02
   1.1104000e-01
   4.4700000e-03
  -2.7450000e-02
   2.0670000e-02
   2.7060000e-02
  -2.7700000e-03
  -2.8950000e-02
  -8.1900000e-02
   5.0310000e-02
   5.7610000e-02
   1.3270000e-02
   1.9030000e-02
  -4.3700000e-02
   5.3680000e-02
  -4.5800000e-03
  -7.5560000e-02
  -2.8650000e-02
  -5.0810000e-02
   6.1310000e-02
   3.7650000e-02
  -4.5760000e-02
   1.1006000e-01
  -3.3500000e-02
   6.1220000e-02
   5.3930000e-02
  -1.0027000e-01
   2.4840000e-02
  -2.7230000e-02
  -3.7700000e-02
   1.7660000e-02
  -6.2290000e-02
  -2.6600000e-03
   1.4005000e-01
   2.7100000e-03
   3.0110000e-02
   2.4810000e-02
   1.2280000e-02
   1.0175000e-01
   2.3600000e-03
  -2.8710000e-02
  -4.5680000e-02
  -6.3100000e-03
   2.5660000e-02
   3.6700000e-03
  -7.1890000e-02
  -6.0300000e-03
   5.2860000e-02
   6.1170000e-02
   2.6020000e-02
  -4.4440000e-02
   8.0300000e-03
   5.1410000e-02
   5.0450000e-02
  -3.4790000e-02
  -3.6200000e-03
   9.8400000e-03
   1.1730000e-02
   1.4590000e-02
  -2.2870000e-02
  -2.0400000e-02
   3.6220000e-02
   1.7330000e-02
   3.1500000e-03
  -4.1320000e-02
  -8.3080000e-02
  -4.7270000e-02
   3.4440000e-02
  -5.9000000e-02
  -4.3570000e-02
   5.2510000e-02
   1.0529000e-01
   1.8510000e-02
   9.1660000e-02
   6.3600000e-03
   8.8090000e-02
   6.0270000e-02
  -3.1910000e-02
  -2.4160000e-02
  -1.0674000e-01
  -1.0693000e-01
   4.4420000e-02
  -6.9290000e-02
  -1.1178000e-01
   5.9390000e-02
  -1.9910000e-02
   1.6618000e-01
   3.6080000e-02
   3.7730000e-02
   7.8800000e-02
   6.4900000e-02
  -1.2670000e-02
   1.0100000e-03
  -1.3720000e-01
  -6.4950000e-02
  -2.0540000e-02
  -1.1782000e-01
   6.1390000e-02
  -3.0900000e-02
   7.3230000e-02
   6.9830000e-02
   5.1520000e-02
   2.3910000e-02
   5.2640000e-02
  -1.2170000e-02
   5.0700000e-03
  -2.1700000e-03
  -2.8840000e-02
   1.5660000e-02
  -5.5080000e-02
   5.1980000e-02
   4.1040000e-02
  -3.1040000e-02
   8.6640000e-02
   3.9920000e-02
  -1.0560000e-02
   7.1670000e-02
  -5.3190000e-02
   1.9380000e-02
   5.9910000e-02
  -6.8440000e-02
   1.3960000e-02
  -6.8760000e-02
  -5.7470000e-02
   1.4860000e-02
  -3.5200000e-02
   3.1390000e-02
  -1.8100000e-03
   3.4220000e-02
   1.0745000e-01
  -1.1085000e-01
   8.8970000e-02
   2.7230000e-02
  -6.3990000e-02
   4.3240000e-02
  -4.0250000e-02
   1.2970000e-02
   5.8840000e-02
  -6.5040000e-02
  -2.4240000e-02
  -4.3430000e-02
  -2.6160000e-02
   6.9720000e-02
  -4.9410000e-02
   3.7480000e-02
   5.5820000e-02
   4.8750000e-02
   2.8870000e-02
   3.7290000e-02
  -6.3030000e-02
   8.6010000e-02
  -5.4180000e-02
  -5.1770000e-02
  -7.3320000e-02
  -4.0060000e-02
   7.9100000e-02
   1.2120000e-02
   3.8140000e-02
   6.6380000e-02
   8.3190000e-02
   6.3770000e-02
  -1.4040000e-02
  -9.0700000e-02
  -6.9070000e-02
  -7.6330000e-02
  -6.2100000e-02
  -9.2970000e-02
   1.4800000e-03
   6.3060000e-02
   1.0317000e-01
   5.7440000e-02
   1.1335000e-01
   1.1677000e-01
   4.9760000e-02
   4.9900000e-03
  -9.7990000e-02
  -6.6050000e-02
  -7.8140000e-02
  -7.1530000e-02
  -6.3090000e-02
  -1.1380000e-02
   6.7810000e-02
   1.1932000e-01
   3.2270000e-02
   6.8870000e-02
   5.1600000e-02
   2.9420000e-02
  -1.8840000e-02
  -9.3410000e-02
   9.8400000e-03
  -4.4530000e-02
  -2.6570000e-02
  -2.4700000e-03
  -1.5380000e-02
   8.4090000e-02
   1.1362000e-01
  -6.9600000e-03
   6.2760000e-02
   3.6690000e-02
  -2.2670000e-02
   2.4350000e-02
  -9.7910000e-02
  -2.3900000e-03
  -1.8750000e-02
  -9.1000000e-03
   3.2490000e-02
  -2.8130000e-02
   1.9580000e-02
   1.0822000e-01
   4.9240000e-02
   4.7600000e-02
   5.6650000e-02
  -5.1680000e-02
   5.3220000e-02
  -5.5410000e-02
  -9.7090000e-02
  -5.8480000e-02
  -2.9800000e-02
   4.7460000e-02
   2.0480000e-02
  -2.4870000e-02
   1.0441000e-01
   5.6340000e-02
   4.5290000e-02
  -5.2810000e-02
  -4.7460000e-02
   2.2620000e-02
  -2.1800000e-02
  -5.5740000e-02
  -5.2420000e-02
   5.2090000e-02
   1.0071000e-01
   5.8130000e-02
  -4.3540000e-02
   3.1860000e-02
   2.5800000e-02
   2.2430000e-02
  -2.6270000e-02
  -1.2478000e-01
  -3.2820000e-02
   5.7770000e-02
  -3.8190000e-02
  -5.0890000e-02
   1.3050000e-02
   2.7660000e-02
   1.4707000e-01
  -1.0280000e-02
  -4.4200000e-02
   2.6320000e-02
   6.3000000e-04
   1.3710000e-02
  -4.2500000e-02
  -1.1039000e-01
   1.0010000e-01
   8.8120000e-02
   5.8290000e-02
  -3.1500000e-03
   9.3800000e-03
   1.3542000e-01
   8.1950000e-02
  -1.1247000e-01
  -5.2150000e-02
  -5.7220000e-02
   4.0630000e-02
   5.5470000e-02
  -1.3701000e-01
   7.9400000e-02
   3.5620000e-02
   9.8790000e-02
   4.6470000e-02
  -4.7160000e-02
  -8.8600000e-03
   4.3180000e-02
   6.6600000e-03
  -3.9620000e-02
  -7.5670000e-02
  -2.7580000e-02
   1.6237000e-01
  -2.5610000e-02
   1.0610000e-02
  -3.8030000e-02
   3.0190000e-02
   6.8740000e-02
  -4.7520000e-02
  -9.1930000e-02
  -4.1510000e-02
  -4.4400000e-03
   4.7490000e-02
  -1.7800000e-03
  -3.1890000e-02
   7.9950000e-02
  -1.5770000e-02
   1.1746000e-01
  -3.2160000e-02
  -2.4270000e-02
  -7.6800000e-03
  -8.3100000e-03
   2.8620000e-02
   5.4040000e-02
  -1.4852000e-01
   6.6240000e-02
   6.9450000e-02
  -1.7000000e-03
   2.3800000e-02
  -1.4858000e-01
   6.5340000e-02
   3.4770000e-02
  -3.4220000e-02
  -9.7090000e-02
  -9.2900000e-03
  -4.4800000e-02
   1.3514000e-01
  -4.2830000e-02
   1.4280000e-02
   8.7790000e-02
   2.9230000e-02
   1.4441000e-01
  -7.3210000e-02
  -2.4680000e-02
  -4.8170000e-02
   2.2260000e-02
  -1.4780000e-02
  -8.5190000e-02
  -7.2820000e-02
  -1.2300000e-03
   1.1398000e-01
   6.1420000e-02
   1.8260000e-02
  -1.4310000e-02
   1.2379000e-01
   5.4560000e-02
   7.4000000e-03
  -8.4200000e-02
  -9.1410000e-02
   8.5130000e-02
   2.2460000e-02
  -6.0900000e-02
  -7.6940000e-02
   4.1480000e-02
   6.7640000e-02
   4.2060000e-02
  -6.0900000e-02
  -1.8900000e-03
   8.6390000e-02
   7.2710000e-02
  -4.8560000e-02
  -3.5780000e-02
   2.3200000e-02
   2.1470000e-02
   6.6350000e-02
  -8.5000000e-02
  -9.2700000e-02
   6.8820000e-02
   1.1930000e-02
   9.6200000e-03
  -5.6540000e-02
  -2.4620000e-02
   3.7970000e-02
   9.2230000e-02
   2.7700000e-03
  -8.4040000e-02
   2.2070000e-02
   4.7410000e-02
   3.6600000e-02
  -1.0372000e-01
   7.8400000e-03
   8.0420000e-02
   6.7120000e-02
  -1.8590000e-02
  -4.1460000e-02
   5.2370000e-02
   1.1302000e-01
  -3.5750000e-02
  -1.1420000e-01
   7.9000000e-03
  -3.7370000e-02
   8.5540000e-02
  -7.6690000e-02
  -7.8090000e-02
   9.7360000e-02
   3.5780000e-02
  -2.5720000e-02
   3.2900000e-03
   2.7580000e-02
   7.9400000e-02
   6.6050000e-02
  -1.3901000e-01
  -4.9130000e-02
   1.9600000e-02
   4.4580000e-02
  -1.8040000e-02
  -1.0457000e-01
  -4.1100000e-03
   7.4220000e-02
   5.1500000e-03
   2.0150000e-02
  -4.3270000e-02
   1.6310000e-02
   6.7170000e-02
   1.0140000e-02
  -5.2830000e-02
  -1.1790000e-02
   3.5510000e-02
   4.8150000e-02
  -3.9950000e-02
  -1.3630000e-02
   1.4810000e-02
   3.8850000e-02
   3.9780000e-02
  -9.8350000e-02
  -1.5900000e-03
  -3.2680000e-02
   2.3110000e-02
   6.2000000e-03
   2.3250000e-02
  -2.6900000e-03
   1.1025000e-01
   7.0350000e-02
  -2.8020000e-02
   2.6870000e-02
  -2.3580000e-02
  -3.7000000e-03
  -4.8830000e-02
  -3.0930000e-02
  -4.4340000e-02
   6.8160000e-02
   9.5400000e-03
   4.5790000e-02
   2.1690000e-02
   5.1240000e-02
   4.8040000e-02
  -6.1940000e-02
   3.0320000e-02
  -1.1721000e-01
  -4.3900000e-03
  -5.5110000e-02
  -2.9890000e-02
   6.4460000e-02
   6.3340000e-02
   5.9330000e-02
   1.2963000e-01
   3.7370000e-02
   1.9690000e-02
   6.9610000e-02
  -9.9420000e-02
   1.9300000e-02
  -8.4830000e-02
  -8.0230000e-02
  -7.7570000e-02
   6.6100000e-03
   7.5700000e-03
  -3.2020000e-02
   7.8030000e-02
   5.2010000e-02
   4.2220000e-02
  -6.3690000e-02
   5.5550000e-02
  -7.5100000e-03
   4.5240000e-02
  -1.7930000e-02
  -3.3450000e-02
   4.4230000e-02
  -2.4240000e-02
   2.0260000e-02
  -1.7790000e-02
   4.0000000e-02
   2.7660000e-02
   5.2010000e-02
  -1.1980000e-02
  -2.2890000e-02
  -4.1810000e-02
  -2.9300000e-03
   1.4640000e-02
  -1.1380000e-02
  -3.5950000e-02
   9.0800000e-03
   2.7310000e-02
   5.6670000e-02
  -1.6700000e-02
  -5.3700000e-03
   3.5180000e-02
   5.5380000e-02
   2.7420000e-02
  -5.2100000e-03
   2.9360000e-02
   1.6200000e-03
  -1.2300000e-03
  -9.0450000e-02
  -2.2980000e-02
  -4.0410000e-02
   1.3050000e-02
  -1.4920000e-02
   7.2440000e-02
   2.4100000e-03
   3.1940000e-02
   8.0990000e-02
   4.8720000e-02
  -2.2000000e-04
  -2.7280000e-02
  -5.1710000e-02
   1.4610000e-02
   3.8060000e-02
  -9.5200000e-02
   5.7880000e-02
  -4.8500000e-03
   2.3200000e-02
   4.6580000e-02
  -4.3900000e-02
   3.2930000e-02
   3.8580000e-02
  -2.2070000e-02
  -4.1400000e-02
  -6.3170000e-02
   4.9980000e-02
  -6.7700000e-03
  -4.5460000e-02
   5.1710000e-02
  -5.1300000e-03
   9.4460000e-02
   5.1270000e-02
  -3.2960000e-02
   4.7270000e-02
   1.1240000e-02
   3.6220000e-02
  -4.4550000e-02
  -1.1307000e-01
   3.5400000e-02
  -6.9600000e-03
  -7.3780000e-02
  -9.3500000e-03
  -3.6580000e-02
   8.0280000e-02
   9.3390000e-02
  -2.7640000e-02
  -3.4190000e-02
   3.0650000e-02
   4.6470000e-02
   5.0720000e-02
  -6.3470000e-02
  -1.4260000e-02
   3.1910000e-02
   1.4780000e-02
   6.9100000e-03
  -1.3317000e-01
   5.9360000e-02
   2.0290000e-02
  -1.9800000e-02
   5.0180000e-02
  -4.5160000e-02
   2.3310000e-02
   9.7830000e-02
  -6.2600000e-02
   6.3230000e-02
   2.7580000e-02
  -2.1170000e-02
   1.0213000e-01
  -2.8930000e-02
   3.7120000e-02
   3.7450000e-02
  -1.3353000e-01
   4.8610000e-02
  -4.9570000e-02
  -4.6640000e-02
   7.6740000e-02
  -5.7990000e-02
   1.1924000e-01
   9.4700000e-02
  -5.1270000e-02
   2.2100000e-02
  -2.6070000e-02
  -2.8410000e-02
   3.5620000e-02
  -1.0833000e-01
   6.1700000e-03
   4.6530000e-02
   6.9310000e-02
   3.2820000e-02
   3.3010000e-02
   2.1580000e-02
   7.1120000e-02
  -9.0400000e-02
  -2.8620000e-02
  -2.4050000e-02
  -1.0090000e-01
   2.3960000e-02
  -7.9500000e-03
  -4.6040000e-02
   3.7590000e-02
   7.7180000e-02
   1.0858000e-01
   1.3690000e-01
  -2.0670000e-02
   8.7850000e-02
  -4.3680000e-02
  -1.1210000e-02
  -5.0200000e-02
  -9.3960000e-02
  -9.7580000e-02
   1.3270000e-02
   3.5100000e-03
   1.5160000e-02
   8.8000000e-03
   3.1830000e-02
   1.6766000e-01
   5.0670000e-02
   5.7720000e-02
  -6.5260000e-02
   4.6890000e-02
  -6.0790000e-02
  -5.6590000e-02
  -1.6215000e-01
  -8.8010000e-02
   1.5460000e-02
   4.0500000e-02
   1.6590000e-02
   6.6930000e-02
   6.7700000e-02
   1.2738000e-01
   7.0960000e-02
  -5.0830000e-02
  -5.9800000e-03
  -4.1890000e-02
  -8.5570000e-02
  -1.0367000e-01
  -8.5790000e-02
  -2.9120000e-02
   1.2843000e-01
  -6.9100000e-03
   7.8800000e-02
   9.1030000e-02
   4.1130000e-02
   6.3170000e-02
  -5.1930000e-02
  -3.1170000e-02
  -7.2740000e-02
  -9.9300000e-03
  -6.6760000e-02
  -1.8370000e-02
  -4.3760000e-02
   1.1373000e-01
   3.1310000e-02
   5.3220000e-02
   7.4000000e-03
   2.4950000e-02
   2.9940000e-02
  -6.7480000e-02
  -7.4190000e-02
   2.4400000e-03
   2.2620000e-02
   2.8650000e-02
  -5.4300000e-03
  -1.2560000e-02
   1.2135000e-01
   1.2600000e-03
   3.2100000e-03
  -4.6280000e-02
  -4.2390000e-02
   5.1030000e-02
   4.3270000e-02
  -6.5690000e-02
   4.1760000e-02
   2.3000000e-02
   1.2218000e-01
   4.6090000e-02
  -5.4370000e-02
   4.3540000e-02
  -4.6300000e-03
   2.7010000e-02
  -5.7300000e-02
  -1.0926000e-01
  -1.6310000e-02
   5.0230000e-02
   6.4350000e-02
   5.8540000e-02
  -1.9200000e-03
   9.1110000e-02
   9.2260000e-02
  -3.7510000e-02
  -4.5620000e-02
  -6.8550000e-02
  -8.1840000e-02
  -1.6730000e-02
  -8.0360000e-02
  -2.5140000e-02
   6.0160000e-02
   9.4150000e-02
   1.3122000e-01
   4.9160000e-02
  -5.5700000e-03
   5.3660000e-02
  -6.1420000e-02
  -2.1690000e-02
  -1.0043000e-01
  -1.3893000e-01
   5.7600000e-03
  -2.9690000e-02
  -3.7300000e-03
   1.2150000e-02
   2.8160000e-02
   1.2673000e-01
   7.4440000e-02
   7.6500000e-03
   2.2460000e-02
  -4.8500000e-02
  -1.9770000e-02
   7.4000000e-04
  -2.8130000e-02
  -1.0360000e-02
  -2.3170000e-02
   1.0984000e-01
   1.0723000e-01
  -2.3250000e-02
   5.9720000e-02
   2.4680000e-02
  -2.2200000e-03
   3.0710000e-02
  -9.2560000e-02
  -8.7770000e-02
   1.8010000e-02
  -5.9500000e-02
   1.8780000e-02
  -3.3780000e-02
   1.7900000e-02
   1.0855000e-01
  -4.4010000e-02
   9.2670000e-02
   2.0120000e-02
  -2.8460000e-02
   5.6840000e-02
   4.2440000e-02
  -6.0180000e-02
   7.8330000e-02
  -6.4760000e-02
   1.4670000e-02
   4.9980000e-02
  -5.3740000e-02
   1.0164000e-01
  -5.5880000e-02
   4.7200000e-03
  -6.1530000e-02
   4.8060000e-02
  -1.9990000e-02
   7.5950000e-02
  -2.2350000e-02
   1.0726000e-01
   7.1620000e-02
   4.1730000e-02
  -3.2600000e-03
  -6.8980000e-02
  -4.4530000e-02
  -1.0476000e-01
  -9.6500000e-03
  -1.5288000e-01
   6.9780000e-02
   3.3700000e-03
   1.6791000e-01
   4.3810000e-02
   1.1965000e-01
  -1.3240000e-02
  -1.0310000e-02
  -2.8840000e-02
  -9.9450000e-02
  -7.2630000e-02
  -1.1502000e-01
   4.9980000e-02
  -3.0520000e-02
   6.7750000e-02
   4.5800000e-03
   1.7320000e-01
   3.5290000e-02
   7.5020000e-02
   4.4610000e-02
  -3.9670000e-02
  -6.0290000e-02
  -6.1330000e-02
  -8.9700000e-03
  -8.9770000e-02
   1.6750000e-02
   6.9890000e-02
   5.6290000e-02
   6.9010000e-02
   1.0310000e-02
  -1.0140000e-02
   1.1228000e-01
  -4.0940000e-02
  -3.0320000e-02
  -4.0190000e-02
  -5.0180000e-02
   1.6400000e-02
   9.1000000e-03
  -8.3380000e-02
   4.3210000e-02
   8.7500000e-03
   5.3440000e-02
   1.5770000e-02
  -2.4180000e-02
   2.1610000e-02
   3.1150000e-02
   1.8560000e-02
  -1.1980000e-02
  -3.2460000e-02
  -4.4610000e-02
   7.3340000e-02
  -1.7990000e-02
   2.3220000e-02
   4.2110000e-02
   2.1410000e-02
   5.4590000e-02
  -3.7800000e-03
  -6.7610000e-02
   1.6450000e-02
   5.1500000e-03
   7.0850000e-02
   2.3440000e-02
  -1.0548000e-01
   5.4620000e-02
   2.1960000e-02
   2.8490000e-02
  -9.2700000e-03
  -1.1930000e-02
   4.3300000e-03
   1.0797000e-01
   3.0020000e-02
  -7.7620000e-02
   3.0930000e-02
  -4.9790000e-02
   1.1110000e-01
   9.6800000e-03
  -1.2563000e-01
  -4.3270000e-02
   6.3470000e-02
   6.0180000e-02
  -1.7050000e-02
  -6.4710000e-02
  -4.8000000e-03
   1.0759000e-01
   5.7800000e-02
  -1.3490000e-02
  -1.5660000e-02
  -1.7520000e-02
   2.7030000e-02
   9.3200000e-03
  -1.0978000e-01
  -4.8530000e-02
  -5.1960000e-02
   1.5771000e-01
   5.9200000e-03
  -4.0580000e-02
  -2.5910000e-02
   5.6040000e-02
   5.8240000e-02
  -3.4220000e-02
  -1.0866000e-01
  -7.0380000e-02
   8.6280000e-02
   1.4830000e-02
   2.3330000e-02
  -6.0950000e-02
   7.9540000e-02
   8.1240000e-02
   4.5540000e-02
  -1.0625000e-01
   1.3000000e-02
  -3.6190000e-02
   1.7850000e-02
  -4.8230000e-02
  -3.4820000e-02
  -2.5640000e-02
   2.0700000e-02
   8.5820000e-02
   4.0830000e-02
   3.1830000e-02
   3.8900000e-03
   7.0080000e-02
   6.9000000e-04
   3.9810000e-02
  -1.1055000e-01
   2.1820000e-02
  -4.5200000e-03
  -9.7900000e-03
  -7.5180000e-02
   4.3300000e-03
   6.5830000e-02
   1.0912000e-01
   2.6510000e-02
   2.6130000e-02
   6.4540000e-02
   1.1130000e-02
   3.4850000e-02
  -1.0005000e-01
  -3.1780000e-02
   3.1300000e-03
   3.0320000e-02
  -3.8690000e-02
   2.1550000e-02
   1.4700000e-02
   6.8900000e-02
   8.9050000e-02
   1.2600000e-03
   2.8950000e-02
   3.0710000e-02
   1.5270000e-02
  -8.2670000e-02
  -4.5870000e-02
  -8.8590000e-02
  -2.6900000e-03
  -3.8360000e-02
   1.1080000e-02
   9.0100000e-02
   4.2200000e-03
   8.8510000e-02
  -2.8540000e-02
  -2.6620000e-02
   3.9510000e-02
  -3.0740000e-02
  -1.0619000e-01
   1.3270000e-02
   1.6510000e-02
   9.0370000e-02
   6.4050000e-02
  -9.0800000e-03
   7.5760000e-02
   5.3500000e-03
   9.4900000e-03
  -3.5310000e-02
  -5.0310000e-02
  -2.6870000e-02
  -1.0534000e-01
  -3.5920000e-02
  -6.0000000e-04
  -3.8190000e-02
   3.2080000e-02
   8.7130000e-02
   1.0126000e-01
   9.7470000e-02
   8.0170000e-02
   3.5600000e-03
   7.3590000e-02
  -4.4530000e-02
  -7.6910000e-02
  -6.0160000e-02
  -1.0567000e-01
  -1.6260000e-02
   4.4420000e-02
  -1.0216000e-01
   3.2490000e-02
   9.9990000e-02
  -2.0590000e-02
   6.8680000e-02
  -1.5110000e-02
   2.4730000e-02
   3.3200000e-03
   1.2170000e-02
  -7.1000000e-04
  -2.3960000e-02
   2.6160000e-02
   3.6300000e-02
  -4.7540000e-02
   1.1488000e-01
   2.8820000e-02
  -1.2900000e-03
   5.4040000e-02
  -5.9280000e-02
   3.3200000e-03
  -2.1520000e-02
  -4.6420000e-02
  -1.3740000e-02
  -8.5000000e-04
  -1.3020000e-02
   6.5910000e-02
  -1.3850000e-02
   8.3730000e-02
   3.0630000e-02
   3.7430000e-02
   3.1420000e-02
  -4.6750000e-02
   3.4440000e-02
  -3.8930000e-02
  -1.5930000e-02
  -3.0380000e-02
   1.0360000e-02
   4.4880000e-02
   2.6540000e-02
   2.7450000e-02
   5.1790000e-02
   1.4260000e-02
   8.2000000e-03
  -3.1530000e-02
  -9.9280000e-02
   2.4100000e-03
  -4.5460000e-02
  -1.0720000e-02
   7.6500000e-03
   1.5980000e-02
   8.9600000e-02
   6.1940000e-02
   1.5100000e-03
   1.9470000e-02
   1.9200000e-03
  -1.8890000e-02
  -4.3650000e-02
  -8.2280000e-02
  -3.3400000e-02
  -6.4980000e-02
   4.2030000e-02
  -4.6560000e-02
  -3.7450000e-02
   4.4360000e-02
   1.2508000e-01
   1.9470000e-02
   3.4330000e-02
  -7.4280000e-02
   4.5190000e-02
   3.5180000e-02
  -3.4880000e-02
  -1.1494000e-01
  -2.0020000e-02
   8.9300000e-02
  -1.9770000e-02
  -4.8640000e-02
   1.7790000e-02
   5.1770000e-02
   1.3103000e-01
   1.3350000e-02
  -3.8520000e-02
  -2.2650000e-02
  -1.1520000e-02
   2.4460000e-02
  -1.2464000e-01
  -8.7710000e-02
   1.0235000e-01
   6.3450000e-02
   5.1790000e-02
   8.3600000e-02
   7.6200000e-03
   1.3627000e-01
   1.7300000e-03
  -8.1730000e-02
  -3.2000000e-02
  -8.2720000e-02
  -3.0630000e-02
  -1.0250000e-02
  -6.7590000e-02
   5.5930000e-02
   6.6540000e-02
   1.1343000e-01
   1.2505000e-01
   5.5600000e-02
   4.8500000e-02
  -4.6100000e-03
  -3.9560000e-02
  -6.8330000e-02
  -1.0718000e-01
  -5.7910000e-02
  -4.5730000e-02
   6.3140000e-02
   2.9170000e-02
  -2.6980000e-02
   1.3915000e-01
   1.0120000e-01
   1.8950000e-02
   3.2870000e-02
   1.5600000e-02
  -6.9090000e-02
   2.8270000e-02
  -1.0948000e-01
   3.1300000e-03
   1.8180000e-02
  -3.3640000e-02
   5.8150000e-02
   8.2000000e-04
   3.5290000e-02
   4.4230000e-02
   7.8610000e-02
   5.1500000e-03
   3.6190000e-02
  -4.1070000e-02
  -6.7890000e-02
  -9.5960000e-02
  -6.1310000e-02
  -8.8300000e-03
  -1.2867000e-01
   8.3600000e-02
   7.4330000e-02
   1.0496000e-01
   6.2050000e-02
  -3.7070000e-02
   6.0650000e-02
   3.0630000e-02
  -2.2370000e-02
  -8.5850000e-02
  -8.7790000e-02
  -2.2000000e-04
   6.7450000e-02
  -8.7770000e-02
  -3.3450000e-02
   1.1320000e-02
   9.9310000e-02
   7.5070000e-02
  -1.0564000e-01
  -2.4430000e-02
  -1.0230000e-02
  -5.8100000e-03
  -1.9140000e-02
  -3.8600000e-02
  -7.9000000e-03
   8.1430000e-02
   6.9310000e-02
   2.2700000e-02
  -3.3090000e-02
  -3.2100000e-03
   5.1130000e-02
   7.0680000e-02
  -9.9120000e-02
  -5.5360000e-02
  -4.3900000e-03
   5.9550000e-02
   1.0310000e-02
  -9.7330000e-02
   4.9160000e-02
   5.5930000e-02
   1.6177000e-01
   7.5700000e-02
   1.6830000e-02
   1.7140000e-02
   2.0810000e-02
   9.1000000e-03
  -1.3509000e-01
  -7.0710000e-02
  -8.2000000e-04
   5.1330000e-02
   3.0460000e-02
  -2.8980000e-02
   1.6480000e-02
   1.0046000e-01
   1.4389000e-01
  -4.8800000e-03
  -4.3920000e-02
  -3.3200000e-03
  -5.1800000e-03
  -1.4830000e-02
  -3.8250000e-02
  -9.7170000e-02
  -6.8800000e-03
   1.0304000e-01
  -2.6160000e-02
   4.1020000e-02
  -1.5630000e-02
   1.1137000e-01
   1.0975000e-01
  -8.0500000e-02
  -2.1390000e-02
  -7.5260000e-02
   2.2650000e-02
   2.0040000e-02
  -3.9450000e-02
  -2.1030000e-02
   1.0470000e-02
   2.3910000e-02
   2.5910000e-02
  -9.0100000e-02
   6.4790000e-02
   3.7300000e-03
  -2.5000000e-03
   7.3670000e-02
  -3.2410000e-02
   1.4040000e-02
   3.8710000e-02
  -5.3740000e-02
   5.1030000e-02
   1.2120000e-02
  -3.7210000e-02
   4.1210000e-02
  -5.2420000e-02
  -4.8300000e-03
  -2.8930000e-02
  -1.0485000e-01
   2.1820000e-02
  -3.1500000e-03
   4.9110000e-02
   6.6050000e-02
  -3.7730000e-02
   1.0803000e-01
   2.8490000e-02
  -1.4310000e-02
  -7.9050000e-02
  -9.9000000e-03
  -1.0860000e-02
   6.7090000e-02
  -1.2481000e-01
  -2.3000000e-03
   4.0190000e-02
   8.2640000e-02
   6.8410000e-02
  -2.7450000e-02
   1.3700000e-03
   4.9540000e-02
   3.2160000e-02
  -4.8170000e-02
  -2.1720000e-02
  -7.8030000e-02
   1.3632000e-01
  -4.8040000e-02
   2.8930000e-02
  -2.8570000e-02
   4.9630000e-02
   9.7470000e-02
   6.2290000e-02
  -1.4529000e-01
   4.1210000e-02
   4.6750000e-02
   1.7680000e-02
  -3.0930000e-02
  -1.6451000e-01
   6.8160000e-02
   3.7230000e-02
   9.9310000e-02
  -8.0440000e-02
   9.9990000e-02
   5.1080000e-02
   9.8980000e-02
  -3.7560000e-02
  -5.9800000e-02
   7.7000000e-04
   9.1600000e-03
   1.3380000e-02
  -6.7450000e-02
  -5.9800000e-03
   1.1320000e-02
   1.0816000e-01
   4.2060000e-02
   1.1500000e-03
  -3.9150000e-02
   5.6400000e-02
   4.8200000e-02
  -6.1390000e-02
  -5.9990000e-02
  -4.1900000e-03
   1.7110000e-02
   5.0340000e-02
  -2.1280000e-02
   1.9700000e-03
   3.9760000e-02
   4.5130000e-02
   7.0160000e-02
  -1.1003000e-01
  -2.7390000e-02
   4.7000000e-04
  -2.1440000e-02
  -2.9390000e-02
  -4.3620000e-02
  -1.1800000e-03
   9.7580000e-02
   3.5400000e-02
   3.5150000e-02
  -4.7520000e-02
   1.6000000e-04
   4.4530000e-02
  -1.6450000e-02
  -2.1080000e-02
  -1.0814000e-01
   8.8300000e-03
   5.1660000e-02
  -4.2060000e-02
  -5.4230000e-02
  -3.8170000e-02
   2.5060000e-02
   7.9050000e-02
   1.0780000e-02
   2.7700000e-03
   1.7740000e-02
   4.1480000e-02
   8.3130000e-02
   4.7200000e-03
  -6.1400000e-03
  -4.8800000e-03
   9.6200000e-03
   6.3420000e-02
  -2.3940000e-02
  -7.4710000e-02
   6.0180000e-02
   4.2140000e-02
   3.8500000e-02
  -2.4070000e-02
   5.5900000e-03
  -3.7700000e-02
   4.2610000e-02
  -3.6000000e-02
  -3.9450000e-02
   3.2550000e-02
   1.6120000e-02
   4.8800000e-03
   1.5220000e-02
   2.1990000e-02
  -2.4400000e-02
   5.4370000e-02
   2.1220000e-02
   2.7120000e-02
   1.7740000e-02
  -2.1280000e-02
   2.5030000e-02
  -2.8980000e-02
   4.0300000e-03
  -6.6400000e-03
  -2.8050000e-02
   1.5190000e-02
  -6.6600000e-03
  -3.6440000e-02
   6.2730000e-02
  -1.2480000e-02
   1.8750000e-02
   2.7120000e-02
  -3.0130000e-02
   4.2360000e-02
   6.3600000e-03
  -2.4810000e-02
   1.9110000e-02
  -4.2200000e-03
   5.5000000e-04
  -1.8590000e-02
  -9.6570000e-02
   5.5880000e-02
   2.2000000e-04
   1.3790000e-02
  -2.8240000e-02
  -2.1190000e-02
   8.1100000e-02
   3.4350000e-02
  -2.5420000e-02
  -1.1840000e-02
   3.7370000e-02
   4.1350000e-02
   5.0970000e-02
  -7.0050000e-02
   2.1300000e-02
   6.5450000e-02
   5.9220000e-02
   2.8760000e-02
  -9.1710000e-02
  -2.9360000e-02
   5.6430000e-02
  -1.2390000e-02
  -9.1330000e-02
  -6.3030000e-02
   8.6100000e-03
   8.5270000e-02
   6.6600000e-03
   3.8330000e-02
  -3.3150000e-02
   3.7970000e-02
   1.2459000e-01
  -4.7710000e-02
  -9.6590000e-02
  -4.6910000e-02
   7.4770000e-02
  -1.4150000e-02
  -1.4000000e-03
  -9.2020000e-02
   1.5850000e-01
   1.0282000e-01
   8.7240000e-02
  -1.0389000e-01
  -4.4990000e-02
   3.2240000e-02
   1.9220000e-02
  -7.6470000e-02
  -1.4946000e-01
  -2.0970000e-02
   4.9300000e-02
   9.2150000e-02
  -4.9190000e-02
   2.4810000e-02
   3.7480000e-02
   1.6281000e-01
   3.4660000e-02
  -1.2950000e-01
   4.4100000e-03
  -1.7600000e-02
   6.0160000e-02
  -3.0000000e-02
  -9.5880000e-02
   7.4000000e-04
   5.4840000e-02
  -7.7000000e-03
   7.5040000e-02
  -4.6010000e-02
   8.3020000e-02
   4.2310000e-02
   7.7130000e-02
   3.6200000e-03
  -8.0390000e-02
   2.1610000e-02
   5.8100000e-02
  -7.5590000e-02
  -6.1420000e-02
  -9.1300000e-03
  -6.9780000e-02
   8.2800000e-02
  -6.6760000e-02
   1.4070000e-02
  -2.0450000e-02
   6.8790000e-02
   6.8980000e-02
   1.5440000e-02
  -2.1000000e-02
   1.9880000e-02
   4.9650000e-02
   9.7330000e-02
  -3.7750000e-02
  -6.8300000e-02
   8.9300000e-02
  -2.9720000e-02
  -6.6100000e-03
  -8.5130000e-02
  -2.4950000e-02
   4.3620000e-02
  -7.1000000e-04
  -2.8710000e-02
  -1.6090000e-02
  -2.2200000e-03
   8.6450000e-02
  -1.9140000e-02
   6.0900000e-02
  -1.8840000e-02
   3.5100000e-03
   1.6310000e-02
  -5.4230000e-02
  -2.6380000e-02
  -1.2420000e-02
  -3.4930000e-02
   5.2940000e-02
   7.5020000e-02
  -5.3140000e-02
   5.6810000e-02
  -4.6900000e-03
   6.7640000e-02
  -6.3610000e-02
  -5.5690000e-02
   2.9600000e-03
  -2.8790000e-02
   8.0910000e-02
  -3.8080000e-02
   2.8680000e-02
   1.3353000e-01
   5.4430000e-02
   2.1820000e-02
   1.0010000e-02
  -2.5200000e-02
  -4.4000000e-04
  -3.0930000e-02
  -1.0800000e-01
  -7.2740000e-02
  -2.5550000e-02
   5.7610000e-02
   5.1000000e-03
   6.5390000e-02
   7.4250000e-02
   1.0600000e-01
   1.0923000e-01
  -5.6760000e-02
  -3.2960000e-02
  -1.5960000e-02
  -3.8470000e-02
  -5.0940000e-02
  -7.3650000e-02
   2.5360000e-02
   3.2440000e-02
   5.6150000e-02
   2.5800000e-02
   1.3410000e-02
   3.3450000e-02
   4.5430000e-02
  -6.5530000e-02
  -5.7520000e-02
  -5.0390000e-02
  -1.7600000e-02
   6.8410000e-02
  -7.6110000e-02
   8.9100000e-03
   1.1121000e-01
   3.3590000e-02
   1.6070000e-02
  -3.4710000e-02
   1.2780000e-02
  -8.6400000e-03
   1.3540000e-02
  -7.4140000e-02
  -9.3000000e-04
   6.2500000e-03
   8.7410000e-02
   3.5970000e-02
  -4.9430000e-02
   1.7080000e-02
   6.7400000e-03
   5.5470000e-02
  -3.6820000e-02
  -5.4070000e-02
  -4.1700000e-03
   3.2930000e-02
  -3.9500000e-03
   3.4380000e-02
  -4.8310000e-02
   1.1093000e-01
   8.9470000e-02
   5.7600000e-03
   5.3500000e-03
   2.5830000e-02
   1.8320000e-02
  -4.6830000e-02
  -5.4890000e-02
  -8.0830000e-02
  -7.5700000e-03
   1.4300000e-03
   5.2090000e-02
   2.5500000e-02
   5.4640000e-02
   3.9290000e-02
   8.6230000e-02
   9.1300000e-03
  -4.8500000e-03
  -2.8080000e-02
  -2.6840000e-02
   9.4600000e-03
  -8.8180000e-02
  -1.0268000e-01
   3.4600000e-02
   4.6670000e-02
  -1.6010000e-02
   6.9920000e-02
  -2.3250000e-02
   5.1960000e-02
   1.1258000e-01
  -4.9650000e-02
  -7.4440000e-02
  -2.3800000e-02
   8.7700000e-03
  -1.1870000e-02
  -1.1135000e-01
  -8.7550000e-02
   1.1836000e-01
   8.5190000e-02
   6.0480000e-02
  -3.5700000e-02
   1.1930000e-02
   6.5500000e-02
   8.1200000e-03
  -6.5470000e-02
  -5.9250000e-02
  -1.0589000e-01
   5.0890000e-02
   7.1620000e-02
  -1.9580000e-02
   6.1280000e-02
   9.4370000e-02
   9.2120000e-02
   7.6060000e-02
  -8.1540000e-02
  -3.5730000e-02
   8.4200000e-03
  -4.2000000e-02
  -8.8120000e-02
  -1.2497000e-01
  -5.5360000e-02
   1.0951000e-01
   6.7530000e-02
   1.0115000e-01
   1.0065000e-01
   6.3530000e-02
   1.3339000e-01
  -2.3030000e-02
  -1.2777000e-01
  -8.1820000e-02
  -7.0570000e-02
  -3.8220000e-02
  -3.7750000e-02
  -6.5360000e-02
   7.2850000e-02
   6.7370000e-02
   1.1974000e-01
   4.6780000e-02
   1.9880000e-02
  -7.1070000e-02
   1.9960000e-02
  -8.2500000e-02
  -9.2260000e-02
  -1.1672000e-01
  -2.1030000e-02
   1.1400000e-01
   7.4960000e-02
   7.9160000e-02
   9.5220000e-02
   8.8730000e-02
   1.0134000e-01
   1.4000000e-03
  -2.0599000e-01
  -5.3600000e-02
  -1.0131000e-01
  -6.0000000e-04
  -4.8890000e-02
  -3.3560000e-02
   1.0704000e-01
   1.3333000e-01
   3.9260000e-02
   2.3170000e-02
  -5.3740000e-02
   4.3100000e-02
   4.7410000e-02
  -1.4370000e-01
  -5.8730000e-02
  -1.5050000e-02
   4.9300000e-02
   9.7140000e-02
   6.5500000e-03
   1.2310000e-02
   9.5060000e-02
   9.0370000e-02
  -4.0690000e-02
  -4.9080000e-02
  -9.9090000e-02
   4.8150000e-02
   2.9100000e-03
  -5.7170000e-02
   5.5700000e-03
   1.5490000e-02
   1.0356000e-01
   1.1549000e-01
  -4.1700000e-03
  -1.8840000e-02
   4.7350000e-02
  -2.8540000e-02
   5.0420000e-02
  -2.0347000e-01
  -2.0260000e-02
  -3.9800000e-03
  -3.7150000e-02
   2.8410000e-02
  -8.3210000e-02
   4.1370000e-02
   1.5436000e-01
   1.7880000e-02
   1.0360000e-02
   3.6160000e-02
  -6.7780000e-02
   7.1040000e-02
  -3.2850000e-02
  -7.1230000e-02
   1.5380000e-02
   4.0600000e-03
   2.2180000e-02
   4.6970000e-02
  -7.4170000e-02
   1.5000000e-01
  -1.5930000e-02
   1.3930000e-02
  -4.9380000e-02
  -3.2600000e-02
   3.4680000e-02
  -3.2400000e-03
   1.4280000e-02
   4.0000000e-03
  -1.2500000e-02
   7.6170000e-02
   3.9400000e-02
  -1.6230000e-02
   7.2900000e-03
  -4.7210000e-02
   3.2630000e-02
  -2.9040000e-02
  -9.3960000e-02
  -1.5570000e-02
   1.1790000e-02
   3.4630000e-02
   7.9290000e-02
  -2.4700000e-02
   1.0084000e-01
   3.5900000e-03
   4.2500000e-02
  -3.0270000e-02
  -6.7280000e-02
  -3.0130000e-02
  -3.7950000e-02
  -2.8210000e-02
  -2.8430000e-02
  -1.7000000e-03
   2.9580000e-02
   1.3383000e-01
   1.8370000e-02
   7.3370000e-02
  -3.6900000e-02
   8.7680000e-02
   8.2300000e-03
  -6.9260000e-02
  -7.9320000e-02
  -8.9300000e-02
  -7.0700000e-03
   7.6500000e-03
  -6.6520000e-02
   3.2710000e-02
   7.7870000e-02
   7.1950000e-02
   8.5220000e-02
  -1.5980000e-02
   4.9190000e-02
   2.7560000e-02
  -2.1580000e-02
  -1.0230000e-01
  -1.7710000e-02
  -1.2260000e-02
  -8.9400000e-03
   4.9380000e-02
  -1.3870000e-02
   6.0430000e-02
   1.1285000e-01
   3.4680000e-02
   6.1880000e-02
   1.4500000e-03
  -9.4480000e-02
   3.2820000e-02
  -1.2873000e-01
  -7.1420000e-02
  -8.9100000e-03
  -9.6180000e-02
   9.3660000e-02
   8.3540000e-02
   9.1300000e-02
   1.4233000e-01
   8.0000000e-04
   9.0430000e-02
   4.4310000e-02
  -7.6520000e-02
  -5.6450000e-02
  -1.0849000e-01
  -4.9870000e-02
   2.0590000e-02
  -7.1530000e-02
  -5.4600000e-03
   6.9180000e-02
   8.7410000e-02
   7.7790000e-02
  -5.1460000e-02
   4.7930000e-02
  -1.3630000e-02
   2.4430000e-02
  -3.3370000e-02
  -6.3560000e-02
  -2.9780000e-02
   4.1210000e-02
  -5.3200000e-03
   1.1520000e-02
  -4.5760000e-02
  -3.3590000e-02
   7.0220000e-02
  -1.1410000e-02
   3.0570000e-02
  -1.0560000e-02
  -3.8550000e-02
   8.8290000e-02
   1.4530000e-02
  -8.1400000e-02
   5.6700000e-02
  -6.6000000e-04
   8.3410000e-02
   2.2430000e-02
  -8.0860000e-02
   9.8700000e-03
  -7.7300000e-03
  -4.7000000e-04
  -1.7300000e-03
  -6.7940000e-02
   3.2680000e-02
   3.5590000e-02
   8.6600000e-03
   8.8000000e-03
  -1.3850000e-02
   1.1782000e-01
   4.9130000e-02
  -1.0400000e-01
   3.3670000e-02
   4.0990000e-02
  -2.0480000e-02
  -2.1220000e-02
  -6.3560000e-02
   1.5030000e-02
   6.0050000e-02
   3.6900000e-02
  -8.1620000e-02
   5.6070000e-02
   4.6340000e-02
   6.5120000e-02
  -7.3920000e-02
  -3.6110000e-02
  -1.0170000e-02
   5.5220000e-02
   2.1170000e-02
  -5.5800000e-02
   6.8660000e-02
  -2.2430000e-02
   2.5170000e-02
  -2.9580000e-02
  -7.1640000e-02
  -1.7900000e-02
   4.0410000e-02
   1.8860000e-02
   5.8700000e-03
   1.7930000e-02
   6.0870000e-02
   9.9230000e-02
   1.5900000e-03
   2.8500000e-03
   5.5440000e-02
  -8.7500000e-03
  -9.6500000e-03
  -5.3410000e-02
  -2.5140000e-02
  -2.8460000e-02
   3.4570000e-02
  -1.1900000e-02
  -7.1000000e-04
  -2.2650000e-02
   9.0150000e-02
  -5.5690000e-02
  -1.6120000e-02
   5.0860000e-02
  -4.8040000e-02
   9.0890000e-02
   4.0830000e-02
  -2.6070000e-02
   2.3470000e-02
  -2.5330000e-02
  -3.2130000e-02
   1.3200000e-03
  -9.8980000e-02
   3.4460000e-02
  -2.4290000e-02
   1.0090000e-02
   3.5290000e-02
  -3.4850000e-02
   6.1910000e-02
  -2.5030000e-02
   2.3960000e-02
   3.2050000e-02
  -3.9070000e-02
   2.5800000e-03
   1.0170000e-02
  -4.8390000e-02
   3.6740000e-02
  -4.6310000e-02
  -5.4800000e-03
   7.0350000e-02
  -7.4770000e-02
   1.2941000e-01
   1.2390000e-02
   4.6910000e-02
   5.3110000e-02
  -2.1060000e-02
  -4.1290000e-02
  -1.1200000e-03
  -7.0030000e-02
   5.6500000e-03
   2.9450000e-02
  -4.0990000e-02
   7.9490000e-02
  -1.9220000e-02
   5.2860000e-02
   3.6380000e-02
  -1.5770000e-02
  -3.0700000e-03
   3.4770000e-02
  -7.8740000e-02
   3.1280000e-02
  -4.1070000e-02
   1.1000000e-04
   6.9310000e-02
   6.5500000e-03
   4.8040000e-02
   1.8420000e-02
   1.2355000e-01
   2.0320000e-02
  -6.4130000e-02
  -9.5520000e-02
  -3.4500000e-03
  -4.7730000e-02
  -8.7700000e-03
  -8.6600000e-03
   3.1040000e-02
   1.3566000e-01
   7.6410000e-02
   7.0190000e-02
  -1.3870000e-02
   2.9940000e-02
  -3.0000000e-04
  -1.5660000e-02
  -1.0057000e-01
  -4.4940000e-02
  -4.8450000e-02
   9.0000000e-04
   4.3100000e-02
  -1.1488000e-01
   9.7770000e-02
   5.9690000e-02
   5.8370000e-02
   5.8320000e-02
  -2.5720000e-02
  -2.9040000e-02
   5.8320000e-02
  -7.9240000e-02
  -2.5200000e-02
  -7.3700000e-02
  -9.8240000e-02
   1.3780000e-01
   4.1100000e-02
   5.8980000e-02
   1.9800000e-02
   4.4120000e-02
   8.2970000e-02
  -4.9600000e-03
  -1.2459000e-01
  -4.4360000e-02
  -2.9940000e-02
   4.8000000e-03
  -3.6880000e-02
  -8.8750000e-02
   7.8910000e-02
   7.8610000e-02
   7.1810000e-02
   5.8150000e-02
  -3.2000000e-02
   1.0610000e-02
   2.8730000e-02
  -7.3340000e-02
  -4.8010000e-02
  -1.3594000e-01
   4.5210000e-02
   8.9900000e-03
  -1.8510000e-02
   4.2720000e-02
   3.3720000e-02
   7.2710000e-02
   1.3177000e-01
   1.1870000e-02
  -2.4370000e-02
   3.7700000e-02
  -8.9700000e-03
  -2.0950000e-02
  -1.0370000e-01
  -4.0740000e-02
   2.1170000e-02
   6.6870000e-02
   1.8670000e-02
   2.1470000e-02
  -2.3500000e-02
   9.3060000e-02
   1.3650000e-02
   1.4500000e-03
  -2.9310000e-02
  -4.5500000e-03
   3.2930000e-02
  -1.9170000e-02
  -3.6550000e-02
   2.4570000e-02
   1.4860000e-02
   6.7910000e-02
   1.2800000e-02
  -4.6100000e-03
   1.0515000e-01
   1.5240000e-02
   8.4340000e-02
  -2.6900000e-02
  -4.3950000e-02
  -1.8700000e-02
  -9.9610000e-02
  -1.1398000e-01
   4.2440000e-02
  -1.1527000e-01
   6.1420000e-02
   1.1784000e-01
   1.0140000e-02
   1.7153000e-01
   1.7900000e-02
   5.3080000e-02
   6.4020000e-02
  -9.9170000e-02
  -8.0530000e-02
  -9.7280000e-02
  -1.3599000e-01
   1.3650000e-02
  -6.0790000e-02
   1.9990000e-02
   7.6110000e-02
   6.9590000e-02
   8.1050000e-02
   8.0300000e-03
  -1.2100000e-03
   4.6310000e-02
  -2.8460000e-02
  -7.3400000e-02
  -5.8540000e-02
  -6.1530000e-02
   4.5710000e-02
   3.7320000e-02
   2.3900000e-03
   6.5500000e-03
   8.3130000e-02
   6.3090000e-02
   4.1130000e-02
  -4.6060000e-02
  -8.7930000e-02
   2.7400000e-03
  -2.2730000e-02
  -5.9060000e-02
  -1.3684000e-01
   3.1060000e-02
   1.1310000e-01
   3.9100000e-02
   3.7510000e-02
  -4.1180000e-02
   1.2969000e-01
   1.2357000e-01
  -1.5400000e-03
  -1.1192000e-01
  -3.3260000e-02
   2.3900000e-03
   4.6690000e-02
  -9.7390000e-02
  -5.5330000e-02
   7.5210000e-02
   7.5920000e-02
   7.9070000e-02
  -7.7290000e-02
   1.1680000e-02
   3.4300000e-02
   6.6210000e-02
  -4.5080000e-02
  -3.3230000e-02
  -2.8790000e-02
   5.6210000e-02
   1.9520000e-02
  -3.5180000e-02
   1.1600000e-02
   2.9830000e-02
   6.0050000e-02
   1.0970000e-02
   1.5240000e-02
  -6.0540000e-02
   5.2590000e-02
  -5.4290000e-02
   4.1980000e-02
  -6.5610000e-02
   8.5800000e-03
   2.0070000e-02
   4.2500000e-02
  -1.2780000e-02
  -3.5950000e-02
  -1.8780000e-02
   8.1210000e-02
   7.4500000e-02
  -1.3399000e-01
   4.6610000e-02
   3.3260000e-02
   6.5940000e-02
  -1.5680000e-02
  -3.1260000e-02
   1.1500000e-03
   7.5840000e-02
  -4.7710000e-02
  -9.2700000e-03
   1.9690000e-02
  -4.9020000e-02
   9.1630000e-02
   7.0200000e-03
   1.0040000e-02
   4.9080000e-02
   4.2960000e-02
   3.6380000e-02
  -1.8560000e-02
  -4.1620000e-02
   2.8210000e-02
  -2.6810000e-02
  -2.7880000e-02
  -7.7210000e-02
  -5.3360000e-02
  -1.7380000e-02
   6.3560000e-02
  -6.2430000e-02
   7.9920000e-02
   4.1650000e-02
   4.6970000e-02
   5.3000000e-02
  -1.4830000e-02
   2.8190000e-02
  -1.2530000e-02
  -1.0230000e-02
  -3.9450000e-02
   1.1190000e-02
  -6.0210000e-02
   5.6400000e-02
  -3.9780000e-02
  -1.8860000e-02
   1.5300000e-02
   5.2000000e-04
   7.4600000e-03
  -6.0600000e-03
   2.7230000e-02
   2.9230000e-02
   2.0650000e-02
  -5.1800000e-03
   8.2500000e-02
  -7.4440000e-02
   6.2710000e-02
   6.4710000e-02
  -3.8330000e-02
  -5.0390000e-02
  -3.8250000e-02
  -9.1900000e-03
   1.1529000e-01
  -1.2615000e-01
   5.6500000e-03
   3.6630000e-02
   1.5190000e-02
   9.3060000e-02
  -2.6380000e-02
  -6.1060000e-02
   4.1180000e-02
   1.1430000e-02
   3.5640000e-02
  -1.1200000e-03
  -4.6390000e-02
   1.6476000e-01
  -2.8680000e-02
   6.2950000e-02
  -1.3490000e-02
  -9.5140000e-02
   6.4490000e-02
   3.8280000e-02
  -6.4620000e-02
  -8.7200000e-03
  -5.4590000e-02
   2.5640000e-02
   9.3960000e-02
  -1.3232000e-01
   6.9480000e-02
   2.0370000e-02
   3.1670000e-02
   6.1990000e-02
  -3.6110000e-02
   3.1640000e-02
   4.2110000e-02
  -7.5100000e-02
   4.9400000e-03
  -1.1900000e-02
  -1.4515000e-01
   3.0680000e-02
   3.1810000e-02
  -7.0490000e-02
   6.5500000e-02
   9.0340000e-02
   5.7300000e-03
   5.3330000e-02
   2.2180000e-02
  -2.2000000e-04
   2.5170000e-02
  -1.7250000e-02
  -7.2470000e-02
   4.3510000e-02
  -1.2090000e-02
   2.8500000e-03
   3.3120000e-02
  -1.8450000e-02
   1.1570000e-02
  -1.6070000e-02
  -1.4610000e-02
  -1.2830000e-02
  -2.2320000e-02
  -4.2660000e-02
   4.2770000e-02
  -1.1000000e-04
   2.2980000e-02
   2.7420000e-02
   8.4480000e-02
   7.5810000e-02
   7.7570000e-02
   2.8020000e-02
   3.4770000e-02
   6.4020000e-02
  -3.3640000e-02
  -8.9790000e-02
  -5.1000000e-02
  -3.9450000e-02
  -1.4500000e-03
   1.4040000e-02
  -6.4270000e-02
   1.2876000e-01
   1.4610000e-02
   2.0870000e-02
  -8.5800000e-03
  -8.7770000e-02
   7.0740000e-02
   1.9820000e-02
   1.4500000e-02
   1.3110000e-02
  -5.8210000e-02
   9.0000000e-04
   5.0560000e-02
  -1.1930000e-01
   2.8270000e-02
  -6.0320000e-02
   1.8180000e-02
   3.0520000e-02
  -8.5220000e-02
   2.4100000e-02
   5.6230000e-02
   9.6500000e-03
   5.7690000e-02
  -4.3870000e-02
   1.1410000e-02
   9.7970000e-02
  -5.7170000e-02
   2.8350000e-02
  -4.1350000e-02
  -3.2960000e-02
   7.1920000e-02
  -8.1190000e-02
  -8.0600000e-03
   5.5550000e-02
  -2.6180000e-02
   1.0254000e-01
  -3.4140000e-02
  -1.7790000e-02
   7.6500000e-02
  -3.5180000e-02
   3.2760000e-02
  -1.5240000e-02
  -4.5570000e-02
   4.7760000e-02
   3.4630000e-02
   2.7500000e-02
   2.4270000e-02
  -2.3610000e-02
   5.1000000e-02
   2.2320000e-02
  -4.8970000e-02
  -3.9540000e-02
  -2.2810000e-02
   2.2590000e-02
   4.2960000e-02
   2.5280000e-02
   1.9410000e-02
   3.1370000e-02
   4.3760000e-02
   4.9130000e-02
   5.5700000e-03
  -5.8260000e-02
  -2.6790000e-02
   7.4300000e-03
  -4.4720000e-02
  -3.4220000e-02
   7.2700000e-03
   8.1950000e-02
   4.9000000e-02
   1.9220000e-02
  -2.7500000e-02
   3.5200000e-02
   6.1140000e-02
  -3.8990000e-02
  -5.8980000e-02
  -1.0586000e-01
  -3.0630000e-02
   9.0800000e-03
   2.2570000e-02
   3.0460000e-02
   4.0220000e-02
   7.3810000e-02
   1.8230000e-02
   6.9590000e-02
  -3.8550000e-02
  -4.3590000e-02
  -1.1798000e-01
   1.4670000e-02
  -8.2800000e-02
   2.1930000e-02
   3.5950000e-02
   8.6670000e-02
   1.6147000e-01
   8.5930000e-02
   2.4430000e-02
  -4.4440000e-02
  -5.8240000e-02
  -3.9290000e-02
  -6.7610000e-02
  -1.2933000e-01
  -5.5140000e-02
   3.0000000e-05
   1.6964000e-01
   6.2800000e-03
   1.1320000e-02
   1.2346000e-01
   1.0463000e-01
   1.0556000e-01
  -8.7050000e-02
  -1.1008000e-01
  -9.2480000e-02
   4.2990000e-02
  -7.7700000e-02
  -1.0170000e-02
  -7.9590000e-02
   1.3931000e-01
   1.0945000e-01
   9.1360000e-02
   6.7420000e-02
  -3.7260000e-02
   4.3620000e-02
   2.8050000e-02
  -7.9100000e-02
  -1.1793000e-01
  -4.9240000e-02
  -4.9350000e-02
   1.3290000e-01
  -1.3789000e-01
  -2.9780000e-02
   9.0890000e-02
   5.5220000e-02
   1.0655000e-01
  -5.8350000e-02
  -5.6200000e-03
   1.9000000e-04
   7.5040000e-02
  -1.1003000e-01
  -6.1750000e-02
  -7.4740000e-02
   5.4530000e-02
   7.1590000e-02
  -3.3670000e-02
   8.2500000e-03
   6.1750000e-02
   1.6813000e-01
   3.5100000e-02
  -4.3180000e-02
  -7.2270000e-02
   2.2670000e-02
  -9.6070000e-02
  -1.3020000e-02
  -1.3800000e-01
   3.8440000e-02
   7.5370000e-02
   4.8480000e-02
   1.1398000e-01
  -2.3880000e-02
   1.0112000e-01
  -3.2160000e-02
  -4.2200000e-03
  -3.9560000e-02
  -8.2800000e-02
  -9.3520000e-02
   7.4520000e-02
  -3.1800000e-03
   2.1770000e-02
   9.9090000e-02
   2.2950000e-02
   1.2149000e-01
   9.1300000e-03
   1.0500000e-02
  -8.4910000e-02
  -2.6980000e-02
  -4.7700000e-03
   2.8540000e-02
  -4.0500000e-02
  -1.5130000e-02
   6.0320000e-02
   1.0413000e-01
   8.5870000e-02
  -6.8440000e-02
  -3.3780000e-02
   1.4420000e-02
   1.7190000e-02
  -3.4960000e-02
  -8.6150000e-02
   9.3500000e-03
   4.2880000e-02
   4.6970000e-02
   4.9270000e-02
  -1.6230000e-02
   2.9940000e-02
   1.5159000e-01
  -5.9770000e-02
   1.0470000e-02
  -6.5560000e-02
  -9.3300000e-02
   5.2780000e-02
  -8.1870000e-02
  -2.5860000e-02
  -2.3600000e-03
   3.1830000e-02
   1.0106000e-01
   1.1233000e-01
   1.4450000e-02
   9.3170000e-02
  -2.4270000e-02
   7.3260000e-02
  -5.2290000e-02
  -1.2100000e-01
   5.1300000e-03
  -6.7340000e-02
  -8.2300000e-03
   4.3320000e-02
   8.7500000e-03
   7.4500000e-02
   9.4290000e-02
   2.5550000e-02
   5.3700000e-03
  -2.8300000e-02
  -7.8030000e-02
  -2.1170000e-02
   5.8100000e-03
  -6.2290000e-02
   4.0300000e-03
   3.8500000e-02
   7.8000000e-02
   1.2500000e-02
   1.3050000e-02
  -5.8150000e-02
   1.4970000e-02
   6.0020000e-02
  -1.0756000e-01
  -6.9070000e-02
  -1.4200000e-02
   2.4870000e-02
   1.4280000e-02
   3.1700000e-02
  -2.1580000e-02
   5.0480000e-02
   4.8670000e-02
  -8.8000000e-03
  -3.8740000e-02
  -3.3370000e-02
   4.9000000e-04
  -4.1680000e-02
   6.1170000e-02
  -3.0270000e-02
   4.1900000e-03
   3.8710000e-02
   3.8600000e-02
  -4.9000000e-04
   3.3610000e-02
  -5.3710000e-02
   4.1460000e-02
   6.4020000e-02
  -1.6810000e-02
  -4.2000000e-02
  -2.3550000e-02
   6.9830000e-02
   4.9190000e-02
  -5.5900000e-03
  -5.0200000e-03
   3.3120000e-02
   3.7970000e-02
   8.6100000e-03
  -5.7440000e-02
  -8.8000000e-03
   3.5310000e-02
   5.1770000e-02
   1.3570000e-02
  -1.5440000e-02
   7.6200000e-03
   2.6210000e-02
   3.7810000e-02
  -5.2940000e-02
   5.7770000e-02
   9.2700000e-03
   6.8300000e-03
   4.5290000e-02
  -7.6690000e-02
   1.6230000e-02
   2.8100000e-02
  -2.2540000e-02
   1.7030000e-02
  -3.5890000e-02
  -4.8340000e-02
   5.6870000e-02
  -1.0010000e-02
   2.5660000e-02
   3.3500000e-02
  -5.1160000e-02
   6.9180000e-02
   3.6800000e-02
  -4.6750000e-02
  -2.0970000e-02
  -7.3840000e-02
  -2.0970000e-02
   3.9370000e-02
  -6.2100000e-02
  -8.1700000e-03
   8.2200000e-02
   5.4010000e-02
   1.1609000e-01
  -3.7890000e-02
  -2.2460000e-02
   3.4710000e-02
  -3.8030000e-02
  -2.0760000e-02
  -9.8650000e-02
  -6.7150000e-02
   3.4110000e-02
   5.4800000e-03
   1.4340000e-02
  -4.1700000e-03
   4.3870000e-02
   1.3687000e-01
   2.8760000e-02
   4.3100000e-02
  -3.0130000e-02
  -2.3000000e-03
   2.2840000e-02
  -9.7470000e-02
  -6.9500000e-02
  -5.9720000e-02
  -2.2320000e-02
   5.7190000e-02
   1.5980000e-02
   4.3540000e-02
   1.3432000e-01
   1.2889000e-01
   7.3950000e-02
   1.1630000e-02
  -2.8980000e-02
  -3.9730000e-02
  -1.5190000e-02
  -1.0128000e-01
  -1.2445000e-01
  -2.6980000e-02
   1.8480000e-02
   1.9690000e-02
   1.2890000e-02
   4.0580000e-02
   4.7630000e-02
   9.8210000e-02
  -6.1700000e-03
  -6.3910000e-02
  -5.2530000e-02
  -2.0430000e-02
  -1.4970000e-02
  -4.1700000e-02
  -3.2330000e-02
   1.0120000e-02
   1.2815000e-01
   5.8540000e-02
   3.9130000e-02
   2.9750000e-02
   6.3770000e-02
   8.2000000e-03
  -4.2720000e-02
  -7.5320000e-02
  -7.0660000e-02
  -6.0460000e-02
   3.9920000e-02
  -2.0920000e-02
  -4.0770000e-02
   1.3843000e-01
  -1.4720000e-02
   6.1720000e-02
   5.7300000e-03
   6.0570000e-02
   6.0510000e-02
  -6.7720000e-02
  -1.5110000e-02
   2.2780000e-02
  -9.7880000e-02
   3.3290000e-02
   9.1600000e-03
  -3.6080000e-02
   9.9860000e-02
  -6.0480000e-02
   7.5290000e-02
  -3.2190000e-02
  -3.6930000e-02
  -4.3300000e-03
  -3.9780000e-02
  -5.2700000e-02
   3.8410000e-02
   3.3200000e-03
   3.8110000e-02
   8.3490000e-02
   1.2230000e-02
   6.3690000e-02
   5.0000000e-05
  -2.5750000e-02
  -6.5800000e-03
  -2.0400000e-02
  -4.4720000e-02
  -3.6690000e-02
  -2.5360000e-02
   1.8450000e-02
   1.9690000e-02
   2.6050000e-02
   4.4420000e-02
   2.5030000e-02
   4.3290000e-02
  -5.8590000e-02
   2.1330000e-02
  -4.4100000e-03
  -3.2020000e-02
   6.3470000e-02
   7.0080000e-02
   6.5530000e-02
