# Supplementary material for: A Novel Classification Method for Flutter Signals Based on the CNN and STFT
Source: Hindawi journal article supplement (doi:10.1155/2019/9375437), 2019-04-09
Supplement: f1 [file 9375437.f1.zip › 00_25_z18.0_29channel.txt]

  -7.0000000e-02
  -1.9500000e-03
   1.8180000e-02
  -8.4670000e-02
  -4.3870000e-02
   2.3610000e-02
   7.1860000e-02
   1.4860000e-02
  -5.2620000e-02
  -1.6150000e-02
   3.2490000e-02
   4.4340000e-02
  -1.1350000e-02
  -1.0805000e-01
  -2.1500000e-02
   8.9520000e-02
   8.2000000e-04
   1.9300000e-02
  -6.3340000e-02
   3.2600000e-02
   1.6448000e-01
   1.5100000e-03
  -6.7530000e-02
  -4.6340000e-02
  -1.7030000e-02
   3.9840000e-02
  -6.8740000e-02
  -1.2755000e-01
  -4.8010000e-02
   4.9600000e-03
   1.0975000e-01
  -6.6000000e-04
  -3.4960000e-02
   1.5168000e-01
   1.2706000e-01
   1.2390000e-01
  -2.9280000e-02
  -8.7740000e-02
   1.1650000e-02
   4.3490000e-02
  -5.6840000e-02
  -1.6766000e-01
  -6.3690000e-02
   6.0760000e-02
   7.4030000e-02
  -2.2950000e-02
  -6.1940000e-02
   8.8800000e-03
   1.2333000e-01
   6.0460000e-02
  -3.2270000e-02
   6.2200000e-03
   4.0850000e-02
   3.8990000e-02
  -1.3410000e-02
  -1.3572000e-01
  -8.0060000e-02
   8.0230000e-02
   2.1520000e-02
  -7.4930000e-02
  -8.7130000e-02
  -3.0680000e-02
   1.3350000e-02
   7.0700000e-03
  -4.1730000e-02
  -7.6800000e-03
   5.3660000e-02
   8.7790000e-02
   3.3010000e-02
  -4.3300000e-03
  -3.3500000e-02
  -4.3600000e-03
   6.9000000e-04
  -4.6470000e-02
  -3.6380000e-02
  -9.6200000e-03
   4.8280000e-02
   9.2590000e-02
   8.3900000e-03
  -8.7410000e-02
  -9.7100000e-03
   2.7200000e-02
   4.6090000e-02
  -4.5600000e-02
  -1.2950000e-01
   1.8840000e-02
   8.4090000e-02
  -6.9890000e-02
  -3.0130000e-02
   3.9870000e-02
   6.1390000e-02
   1.1612000e-01
  -4.2500000e-02
  -5.5270000e-02
  -1.6730000e-02
   9.7900000e-03
   2.9860000e-02
  -5.2420000e-02
  -5.7140000e-02
  -3.0850000e-02
   0.0000000e+00
   5.4180000e-02
  -3.6550000e-02
  -7.2740000e-02
   4.8940000e-02
   2.4100000e-02
   6.2980000e-02
  -5.1680000e-02
  -1.0104000e-01
   1.5362000e-01
   1.1217000e-01
  -4.6600000e-03
  -8.7200000e-03
  -4.4340000e-02
   6.7530000e-02
   1.3130000e-02
  -1.2075000e-01
  -7.6220000e-02
  -2.8980000e-02
   6.6600000e-03
  -5.0670000e-02
  -4.5980000e-02
   2.1170000e-02
   4.6670000e-02
   1.0079000e-01
   5.4620000e-02
   2.4840000e-02
   5.2810000e-02
   2.1800000e-02
   9.0000000e-04
  -6.5170000e-02
  -3.4030000e-02
   6.0870000e-02
  -7.4660000e-02
  -6.3200000e-02
   4.0190000e-02
  -3.8000000e-02
   8.4800000e-02
   2.8350000e-02
  -5.2340000e-02
   7.7020000e-02
   9.0000000e-04
  -3.6190000e-02
  -6.5910000e-02
  -1.1200000e-01
   4.8090000e-02
   7.5100000e-02
  -4.4880000e-02
   8.3600000e-03
   4.4310000e-02
   8.4940000e-02
   1.0224000e-01
  -7.4330000e-02
  -9.7910000e-02
   1.1460000e-02
  -5.3380000e-02
  -2.9500000e-02
  -1.3169000e-01
  -5.7690000e-02
   8.2120000e-02
   4.6830000e-02
   7.0790000e-02
   9.4900000e-03
  -2.4180000e-02
   3.1310000e-02
   2.7340000e-02
  -3.5890000e-02
  -4.4250000e-02
  -8.2890000e-02
  -1.4180000e-02
   7.0250000e-02
  -1.9410000e-02
  -6.4820000e-02
  -1.3490000e-02
   1.7900000e-02
   7.6720000e-02
   2.3200000e-02
  -1.0797000e-01
   3.5100000e-02
   8.8860000e-02
  -1.9060000e-02
  -1.3136000e-01
  -5.0610000e-02
   5.7740000e-02
   8.8370000e-02
  -4.1810000e-02
  -8.8670000e-02
   4.8390000e-02
   1.5011000e-01
   5.2340000e-02
  -8.7740000e-02
  -7.0270000e-02
   6.7780000e-02
   1.5568000e-01
  -4.0600000e-03
  -1.6338000e-01
  -6.2790000e-02
   8.8640000e-02
   8.3190000e-02
  -1.1052000e-01
  -1.5055000e-01
   5.9800000e-03
   1.2459000e-01
   6.1960000e-02
  -4.1540000e-02
  -6.4930000e-02
   1.2505000e-01
   7.8720000e-02
   4.9350000e-02
  -8.4500000e-02
  -8.0060000e-02
   5.3930000e-02
   4.7200000e-03
  -1.2009000e-01
  -1.0880000e-01
  -7.1670000e-02
   1.1039000e-01
   1.0967000e-01
  -2.4840000e-02
   9.6000000e-04
   4.4170000e-02
   9.3140000e-02
   3.7970000e-02
  -8.1510000e-02
  -7.8060000e-02
   4.3180000e-02
   3.2960000e-02
  -2.3850000e-02
  -9.2950000e-02
  -2.1960000e-02
   9.4980000e-02
   3.8400000e-03
  -7.0710000e-02
  -9.0670000e-02
  -6.4020000e-02
   1.0460000e-01
  -1.6750000e-02
  -1.2741000e-01
   4.5650000e-02
   5.6200000e-03
   1.0413000e-01
   5.1850000e-02
  -1.5050000e-01
   5.2260000e-02
   7.8550000e-02
   2.9120000e-02
  -5.0500000e-02
  -9.1490000e-02
  -1.1380000e-02
   1.0068000e-01
   7.7600000e-03
  -6.6960000e-02
  -6.4020000e-02
   5.4450000e-02
   6.9420000e-02
  -4.3020000e-02
  -9.9940000e-02
  -8.5460000e-02
   1.1590000e-01
   1.0726000e-01
  -9.8700000e-03
  -8.2120000e-02
   5.9990000e-02
   9.3580000e-02
  -3.5120000e-02
  -8.3270000e-02
  -6.8330000e-02
   9.7900000e-03
   8.8400000e-02
  -4.1180000e-02
  -1.2313000e-01
  -1.0450000e-02
   8.0230000e-02
   6.3660000e-02
  -8.5430000e-02
  -1.1760000e-01
   1.6970000e-02
   1.4704000e-01
   8.2250000e-02
  -1.3870000e-02
  -1.8260000e-02
   9.0070000e-02
   8.3840000e-02
  -2.0970000e-02
  -8.1790000e-02
  -5.0400000e-03
   6.8980000e-02
  -2.5800000e-03
  -7.1000000e-04
  -2.2700000e-02
   7.5040000e-02
   8.9850000e-02
  -8.8620000e-02
  -9.5580000e-02
  -3.0490000e-02
   1.4810000e-02
   1.1460000e-02
  -8.4420000e-02
  -6.0590000e-02
   5.8260000e-02
   9.3770000e-02
   2.5200000e-02
  -1.4610000e-02
  -3.9650000e-02
   2.7090000e-02
   6.6210000e-02
  -1.1321000e-01
  -1.0375000e-01
  -2.5800000e-03
   1.0700000e-03
   1.5100000e-03
  -5.8920000e-02
  -9.4570000e-02
   8.5110000e-02
   6.9810000e-02
   3.7320000e-02
  -1.7710000e-02
  -1.3270000e-02
   1.0172000e-01
  -2.2510000e-02
  -8.1510000e-02
  -5.0230000e-02
  -5.6040000e-02
   8.7700000e-03
  -1.1630000e-02
  -1.0575000e-01
  -6.1960000e-02
  -5.3200000e-03
   7.4770000e-02
   3.5260000e-02
   9.4300000e-03
   3.1610000e-02
   3.7180000e-02
   4.2330000e-02
   4.1760000e-02
  -1.2086000e-01
  -1.7960000e-02
   7.7570000e-02
  -1.4000000e-03
   6.9000000e-04
  -6.3900000e-03
  -6.4200000e-03
   1.0186000e-01
  -8.2300000e-03
  -1.1702000e-01
   2.0020000e-02
   1.0910000e-02
   7.9950000e-02
  -2.1440000e-02
  -8.4860000e-02
   1.0545000e-01
   6.2730000e-02
   6.3030000e-02
   2.6240000e-02
  -1.5127000e-01
   4.4530000e-02
   6.7780000e-02
  -4.3920000e-02
   7.8700000e-03
  -8.4090000e-02
   1.3050000e-02
   9.1030000e-02
  -5.4070000e-02
  -7.0500000e-03
  -3.9920000e-02
  -1.5160000e-02
   6.7420000e-02
  -1.5228000e-01
  -7.8440000e-02
   5.0150000e-02
   1.0060000e-02
   1.3013000e-01
   9.6200000e-03
  -6.0900000e-03
   1.3616000e-01
   1.7080000e-02
   3.9650000e-02
  -5.8900000e-03
  -1.0548000e-01
   3.1800000e-03
  -1.3344000e-01
  -9.3820000e-02
  -2.5030000e-02
  -4.1840000e-02
   6.2460000e-02
   1.9250000e-02
  -7.1000000e-03
   8.9400000e-03
  -2.7170000e-02
   9.1770000e-02
   7.8690000e-02
  -5.2150000e-02
   1.3000000e-02
  -1.7440000e-02
   3.8250000e-02
  -1.3080000e-02
  -8.3020000e-02
   4.7000000e-04
  -1.1490000e-02
  -8.6400000e-03
   4.0690000e-02
  -7.4030000e-02
  -1.5330000e-02
   4.4990000e-02
  -6.2400000e-02
  -1.7680000e-02
  -7.6200000e-03
   6.8500000e-03
   7.8550000e-02
  -1.9960000e-02
  -7.6200000e-03
  -2.1140000e-02
  -1.1320000e-02
   6.4270000e-02
  -1.3300000e-02
  -5.0500000e-02
   4.6800000e-02
  -4.0000000e-02
   3.5750000e-02
   4.1100000e-02
  -7.7510000e-02
   4.3600000e-03
   6.9100000e-03
  -7.7600000e-03
   2.8900000e-02
  -2.5280000e-02
   1.5220000e-02
   4.9930000e-02
  -2.3610000e-02
  -1.7990000e-02
  -5.8400000e-03
  -1.5270000e-02
   4.9980000e-02
   2.6900000e-03
   2.4350000e-02
   6.0070000e-02
   3.7840000e-02
   5.4970000e-02
  -5.3700000e-03
  -2.1610000e-02
   3.5100000e-03
  -4.0250000e-02
  -9.3280000e-02
  -3.3670000e-02
  -4.4640000e-02
  -4.0000000e-03
   4.6140000e-02
  -3.5120000e-02
   4.8040000e-02
   1.1721000e-01
   4.8480000e-02
   1.3680000e-02
  -1.2450000e-02
  -3.0400000e-03
   4.7490000e-02
  -6.8760000e-02
  -2.0950000e-02
   5.9440000e-02
  -5.7580000e-02
  -4.4690000e-02
  -2.5220000e-02
  -9.6810000e-02
  -8.8000000e-04
   1.8750000e-02
  -7.2000000e-02
   4.9960000e-02
   3.0540000e-02
  -7.3500000e-03
   3.7450000e-02
  -1.7000000e-02
  -2.6210000e-02
   5.0780000e-02
  -4.8720000e-02
  -9.3190000e-02
  -4.4120000e-02
   1.7000000e-03
   2.9230000e-02
  -8.7550000e-02
   1.4000000e-03
   5.4150000e-02
  -3.5840000e-02
   3.3070000e-02
   3.4050000e-02
  -4.0660000e-02
   1.4776000e-01
   2.7000000e-04
  -2.4980000e-02
   1.1189000e-01
  -4.4140000e-02
   6.9310000e-02
  -4.1240000e-02
  -1.3599000e-01
   5.9770000e-02
  -7.8640000e-02
  -8.1870000e-02
   5.4230000e-02
  -2.9910000e-02
   7.4960000e-02
   9.3770000e-02
   3.0650000e-02
   8.9580000e-02
   2.5800000e-03
   2.1690000e-02
   1.6310000e-02
  -4.4230000e-02
   2.2730000e-02
  -1.0082000e-01
  -4.2960000e-02
   2.3720000e-02
  -5.7280000e-02
   2.6510000e-02
  -3.4550000e-02
  -6.0460000e-02
   5.8590000e-02
  -4.3350000e-02
   1.9200000e-03
   7.2660000e-02
  -7.9160000e-02
   8.4120000e-02
   3.1370000e-02
  -1.3630000e-02
   1.1782000e-01
  -3.8580000e-02
  -2.4760000e-02
   8.2060000e-02
  -5.2290000e-02
  -3.1150000e-02
  -5.7250000e-02
  -7.5240000e-02
  -1.4000000e-03
  -6.6380000e-02
  -3.5600000e-03
   1.3160000e-02
   2.4020000e-02
   3.1370000e-02
  -8.5520000e-02
   3.3720000e-02
   1.9440000e-02
  -9.9750000e-02
   5.4400000e-02
  -4.5980000e-02
  -2.0260000e-02
   1.2023000e-01
  -2.8980000e-02
  -1.8600000e-03
  -7.2700000e-03
  -3.6380000e-02
   5.9720000e-02
  -3.9890000e-02
  -3.2080000e-02
  -1.7440000e-02
  -5.7770000e-02
   6.6160000e-02
  -2.4290000e-02
  -1.5080000e-02
   4.0280000e-02
  -3.2220000e-02
   9.2920000e-02
   7.2050000e-02
  -3.8930000e-02
   4.7130000e-02
   1.2120000e-02
  -1.1020000e-02
  -4.4100000e-03
  -7.5430000e-02
   2.2240000e-02
  -2.4050000e-02
  -7.7510000e-02
   1.9380000e-02
   2.0840000e-02
   3.1000000e-03
   7.4170000e-02
  -2.0150000e-02
  -8.2000000e-04
   4.0250000e-02
  -2.5640000e-02
   1.1410000e-02
  -1.9360000e-02
   1.4230000e-02
   1.2120000e-02
  -2.0780000e-02
   3.8770000e-02
  -3.0350000e-02
   6.1400000e-03
   6.2160000e-02
  -5.6070000e-02
   5.1000000e-03
  -5.3220000e-02
  -7.7150000e-02
   5.7030000e-02
  -3.3400000e-02
   3.7970000e-02
   6.3120000e-02
  -1.8260000e-02
   3.8330000e-02
  -2.2620000e-02
  -3.3500000e-02
   9.3500000e-03
  -6.2870000e-02
  -2.8190000e-02
   9.9300000e-03
  -9.6000000e-03
   7.4600000e-02
  -1.9000000e-02
  -4.5200000e-03
   4.1260000e-02
  -3.1300000e-03
   4.7190000e-02
   3.1500000e-03
  -1.1439000e-01
  -4.0280000e-02
   9.6200000e-03
  -4.9600000e-03
  -2.0920000e-02
  -4.7270000e-02
   4.8040000e-02
   6.9340000e-02
   3.5700000e-02
   2.5500000e-03
   5.5100000e-03
   4.8090000e-02
   1.8450000e-02
  -8.2230000e-02
  -7.6910000e-02
  -6.1750000e-02
  -1.9880000e-02
  -5.7330000e-02
  -8.0250000e-02
  -4.2580000e-02
   1.8860000e-02
  -3.2600000e-02
   3.9200000e-03
   8.6280000e-02
   3.0270000e-02
   4.3430000e-02
   7.1040000e-02
   1.7220000e-02
   7.2800000e-02
  -2.5990000e-02
  -5.1300000e-02
   2.7690000e-02
   3.9200000e-03
  -7.5400000e-03
  -1.8640000e-02
  -6.4600000e-02
   4.8860000e-02
  -2.7530000e-02
  -1.0545000e-01
   2.5140000e-02
   2.4290000e-02
   4.8390000e-02
   3.7590000e-02
   5.7300000e-03
   6.2160000e-02
   3.3070000e-02
  -4.9900000e-02
  -6.6380000e-02
  -6.1170000e-02
   3.7480000e-02
   3.5970000e-02
  -1.5850000e-02
  -5.3770000e-02
   2.2700000e-02
   5.3790000e-02
   6.2380000e-02
  -8.0600000e-03
  -4.9680000e-02
   3.8930000e-02
   8.8000000e-03
   1.0310000e-02
  -7.9290000e-02
  -3.9130000e-02
   5.6760000e-02
   3.2870000e-02
  -5.6200000e-03
  -4.0140000e-02
   3.2460000e-02
   6.7370000e-02
  -3.2710000e-02
  -4.3160000e-02
   1.9000000e-04
  -4.0090000e-02
   3.6850000e-02
   2.4760000e-02
  -4.1730000e-02
  -2.3000000e-02
  -2.0650000e-02
  -4.0440000e-02
   4.1290000e-02
  -4.2170000e-02
   2.6900000e-03
   5.4620000e-02
  -5.2010000e-02
   1.9190000e-02
  -1.0860000e-02
  -9.2590000e-02
   6.9100000e-03
  -5.2230000e-02
  -1.1460000e-02
   4.0520000e-02
  -7.5430000e-02
   2.2620000e-02
   8.0100000e-03
  -2.6730000e-02
  -4.3900000e-03
  -4.2330000e-02
   5.1440000e-02
   3.0790000e-02
  -1.0940000e-02
   7.4250000e-02
  -1.1730000e-02
   5.9310000e-02
   3.6520000e-02
  -1.2237000e-01
   1.1100000e-02
   9.8400000e-03
  -4.6800000e-02
   2.0920000e-02
  -1.4789000e-01
  -2.0510000e-02
   7.5480000e-02
  -1.5149000e-01
   2.5800000e-02
   5.1930000e-02
   5.1770000e-02
   2.0679000e-01
   1.2120000e-02
   6.4270000e-02
   1.0172000e-01
  -6.6740000e-02
   6.0590000e-02
  -3.9920000e-02
  -1.0937000e-01
  -1.7000000e-03
  -7.9350000e-02
  -7.7510000e-02
   5.3440000e-02
  -1.7330000e-02
   1.2580000e-02
   8.7050000e-02
   1.6450000e-02
   7.8090000e-02
   3.9560000e-02
  -2.2290000e-02
  -2.1170000e-02
  -3.0600000e-02
   1.7800000e-03
  -1.5080000e-02
  -1.1647000e-01
  -5.3580000e-02
   3.8700000e-03
   1.8040000e-02
   9.3220000e-02
  -4.6200000e-02
   2.0100000e-02
   5.0150000e-02
   5.3700000e-03
   2.9600000e-03
  -4.6140000e-02
   2.8500000e-03
  -1.9490000e-02
  -1.8150000e-02
  -2.9600000e-03
  -4.9430000e-02
   8.6600000e-03
   1.0759000e-01
  -4.2880000e-02
  -2.3520000e-02
  -6.7390000e-02
  -6.7280000e-02
   5.4840000e-02
  -8.0910000e-02
  -7.4690000e-02
  -6.3420000e-02
  -8.2470000e-02
   6.8870000e-02
   6.0790000e-02
  -3.4630000e-02
   2.3830000e-02
   7.5810000e-02
   8.9250000e-02
   5.7800000e-02
  -9.9280000e-02
  -2.3300000e-03
   6.0510000e-02
   4.9020000e-02
  -6.9860000e-02
  -1.2248000e-01
   2.7500000e-02
   7.8940000e-02
  -1.1343000e-01
  -8.7740000e-02
  -8.6070000e-02
   1.8730000e-02
   1.4756000e-01
  -7.2300000e-02
  -1.4340000e-02
   1.1469000e-01
   1.1847000e-01
   1.0954000e-01
  -5.1460000e-02
   1.5110000e-02
   6.7910000e-02
  -1.4180000e-02
  -1.6070000e-02
  -5.7140000e-02
  -1.0241000e-01
  -4.7790000e-02
  -7.2380000e-02
  -6.7010000e-02
  -1.5790000e-02
   2.3610000e-02
   5.9550000e-02
   4.6890000e-02
   6.9970000e-02
   2.8160000e-02
   2.5060000e-02
   3.4660000e-02
   2.3690000e-02
  -1.0420000e-02
   5.8210000e-02
  -6.8410000e-02
  -1.7630000e-02
   6.2540000e-02
  -2.1390000e-02
  -1.6970000e-02
  -4.0410000e-02
  -1.0493000e-01
   1.2280000e-02
  -2.8500000e-03
  -4.7350000e-02
  -7.0570000e-02
  -2.8190000e-02
   1.4839000e-01
   7.8090000e-02
  -1.1950000e-02
   5.4290000e-02
   8.1950000e-02
   1.5225000e-01
   9.0450000e-02
  -1.1357000e-01
  -5.4700000e-02
  -2.4290000e-02
  -1.2503000e-01
  -1.3528000e-01
  -1.8940000e-01
  -1.3405000e-01
   2.8800000e-03
  -5.0830000e-02
  -7.9380000e-02
   4.5980000e-02
   7.4580000e-02
   1.0945000e-01
   1.4063000e-01
   7.6090000e-02
   9.9090000e-02
   2.7860000e-02
  -2.9500000e-02
  -5.4370000e-02
  -9.5550000e-02
  -5.5380000e-02
  -5.9390000e-02
  -4.6690000e-02
  -5.2370000e-02
  -9.6480000e-02
  -2.5610000e-02
   6.6900000e-03
  -7.1150000e-02
  -1.5900000e-03
   2.5010000e-02
   7.4500000e-02
   1.3199000e-01
  -5.2590000e-02
  -2.1330000e-02
   1.4274000e-01
   8.0720000e-02
  -5.9110000e-02
  -1.8600000e-03
  -1.3200000e-03
  -2.1630000e-02
  -2.6790000e-02
  -1.1165000e-01
  -7.2740000e-02
  -2.8240000e-02
   7.0200000e-03
   2.8820000e-02
   5.2640000e-02
   5.5850000e-02
   1.1716000e-01
   5.9940000e-02
   8.8800000e-03
   3.6820000e-02
   2.1300000e-02
  -9.3000000e-04
   3.6520000e-02
   2.0760000e-02
  -4.8670000e-02
  -5.0090000e-02
  -4.4700000e-03
  -1.5160000e-02
  -2.9500000e-02
   1.7580000e-02
  -2.1190000e-02
   2.1700000e-03
  -1.2060000e-02
  -4.9790000e-02
   3.4160000e-02
   4.3430000e-02
  -5.7960000e-02
   3.8280000e-02
   5.3050000e-02
  -1.8180000e-02
   4.6120000e-02
  -1.6920000e-02
   2.0120000e-02
   3.8080000e-02
  -9.9860000e-02
  -1.3728000e-01
  -3.7810000e-02
  -7.1600000e-03
   1.9360000e-02
  -1.0594000e-01
  -4.0330000e-02
   8.3210000e-02
   6.2920000e-02
  -4.9570000e-02
  -9.6100000e-02
   2.0600000e-03
   7.7730000e-02
  -1.5790000e-02
  -6.2650000e-02
  -1.9220000e-02
   5.2420000e-02
   1.3939000e-01
  -8.2300000e-03
  -7.2000000e-02
  -2.1030000e-02
   3.3810000e-02
  -4.5500000e-03
  -1.0271000e-01
  -1.6245000e-01
  -6.7700000e-03
   9.3250000e-02
   7.6030000e-02
  -3.0270000e-02
  -2.6400000e-02
   1.7328000e-01
   1.8806000e-01
   4.9680000e-02
  -1.0893000e-01
  -8.6860000e-02
   1.6750000e-02
   1.9410000e-02
  -1.3786000e-01
  -1.6791000e-01
  -7.6800000e-02
   9.0560000e-02
   6.5830000e-02
  -8.2670000e-02
  -2.8490000e-02
   1.6306000e-01
   1.5497000e-01
   6.5670000e-02
  -6.4700000e-03
  -2.8900000e-02
   5.2640000e-02
   4.6560000e-02
  -6.8270000e-02
  -1.2911000e-01
  -1.2580000e-02
   6.2290000e-02
   2.7500000e-02
  -6.7390000e-02
  -4.0990000e-02
  -7.2900000e-03
   8.5740000e-02
  -2.6790000e-02
  -9.6730000e-02
   1.2450000e-02
  -5.6500000e-03
  -1.8970000e-02
   3.3010000e-02
  -4.8910000e-02
   1.1320000e-02
   1.3065000e-01
   1.3650000e-02
   9.8200000e-03
  -1.6180000e-02
  -3.1040000e-02
   4.7680000e-02
  -6.2760000e-02
  -1.4049000e-01
  -1.0296000e-01
  -3.8990000e-02
   5.7250000e-02
  -3.8660000e-02
   2.1990000e-02
   5.6800000e-03
   2.1250000e-02
   1.7819000e-01
   2.7280000e-02
  -7.5070000e-02
   1.0633000e-01
   3.6050000e-02
   3.3920000e-02
   2.9470000e-02
  -1.4320000e-01
  -2.8730000e-02
   4.5570000e-02
  -9.5470000e-02
  -1.2335000e-01
  -8.2250000e-02
   2.1190000e-02
   3.5670000e-02
  -4.9430000e-02
  -4.7700000e-03
   4.7980000e-02
   1.4087000e-01
   1.5538000e-01
  -4.0060000e-02
  -4.5760000e-02
   5.7990000e-02
   5.3490000e-02
  -1.4830000e-02
  -1.7375000e-01
  -1.2832000e-01
   2.5470000e-02
  -4.8940000e-02
  -9.4350000e-02
  -6.7040000e-02
   8.7500000e-03
   1.4704000e-01
   2.4810000e-02
  -3.1750000e-02
   5.8150000e-02
   6.2540000e-02
   1.0800000e-01
   1.8230000e-02
  -9.3390000e-02
   4.2310000e-02
   6.6520000e-02
  -3.4820000e-02
  -5.1050000e-02
  -1.3684000e-01
  -4.0390000e-02
   5.8980000e-02
   1.6420000e-02
  -7.0220000e-02
  -6.2600000e-02
   5.6260000e-02
   1.0208000e-01
   4.4610000e-02
  -2.3990000e-02
   6.2920000e-02
   8.4610000e-02
   7.0440000e-02
  -3.3530000e-02
  -1.2851000e-01
  -3.4930000e-02
   6.0000000e-03
  -3.1640000e-02
  -6.7970000e-02
  -1.0531000e-01
   1.3900000e-02
   1.1299000e-01
   3.4600000e-02
  -2.0510000e-02
  -8.9900000e-03
   6.1800000e-02
   1.4650000e-01
   5.1130000e-02
  -5.5520000e-02
  -2.6300000e-03
  -9.7900000e-03
   5.8430000e-02
  -6.1390000e-02
  -1.4153000e-01
  -4.5160000e-02
  -3.7860000e-02
  -6.5280000e-02
  -3.6440000e-02
  -7.8850000e-02
   5.0500000e-02
   9.2480000e-02
  -7.9200000e-03
   1.2150000e-02
  -3.4050000e-02
   4.0170000e-02
   1.0674000e-01
  -3.9430000e-02
  -3.9780000e-02
  -9.6000000e-04
  -9.8380000e-02
   5.1850000e-02
  -7.1000000e-03
  -6.9090000e-02
   3.1500000e-03
  -1.5220000e-02
   3.4710000e-02
   3.3340000e-02
  -7.1890000e-02
   3.8600000e-02
   3.9890000e-02
   1.2010000e-02
   4.8480000e-02
  -7.4300000e-02
   4.6910000e-02
   1.2426000e-01
  -5.1570000e-02
  -3.0700000e-03
   1.3240000e-02
  -3.7260000e-02
   5.3850000e-02
  -7.0880000e-02
  -2.8600000e-02
   3.9430000e-02
  -3.7540000e-02
  -2.1880000e-02
   3.3700000e-03
   6.2950000e-02
   9.3960000e-02
  -4.9980000e-02
   7.8100000e-03
   4.8340000e-02
  -3.8220000e-02
   9.1330000e-02
  -7.0790000e-02
  -4.5400000e-02
   1.1952000e-01
  -8.8150000e-02
  -6.3640000e-02
   1.6940000e-02
  -5.7990000e-02
   4.7950000e-02
   5.1300000e-03
  -7.0030000e-02
   5.2120000e-02
  -2.2890000e-02
  -3.0980000e-02
   4.8340000e-02
  -6.8300000e-02
   2.1500000e-02
   3.9540000e-02
  -7.0960000e-02
  -3.1640000e-02
   5.2000000e-04
   3.0160000e-02
   4.2690000e-02
  -6.5280000e-02
  -2.6600000e-02
   1.7470000e-02
   7.6220000e-02
  -2.3140000e-02
  -1.2547000e-01
  -1.0750000e-02
   1.3520000e-01
   4.4770000e-02
  -1.9380000e-02
  -4.7710000e-02
   2.8380000e-02
   1.0578000e-01
  -8.6600000e-03
  -5.7170000e-02
  -1.3501000e-01
  -2.1900000e-03
   9.5830000e-02
  -6.6100000e-03
  -1.2993000e-01
  -9.5770000e-02
   3.4300000e-02
   1.0929000e-01
  -2.7090000e-02
  -9.0920000e-02
  -9.8400000e-03
   1.1941000e-01
   1.3728000e-01
  -3.8170000e-02
  -1.0073000e-01
   3.7450000e-02
   1.7293000e-01
   2.0970000e-02
  -1.2152000e-01
  -1.2952000e-01
   2.4950000e-02
   1.0970000e-01
  -2.8710000e-02
  -1.0572000e-01
  -4.9600000e-02
   2.0560000e-02
   7.9510000e-02
  -6.5720000e-02
  -1.2914000e-01
   2.0400000e-02
   6.2270000e-02
   8.3930000e-02
   4.9130000e-02
  -2.1770000e-02
   1.6796000e-01
   1.6665000e-01
   3.1170000e-02
  -3.1940000e-02
  -1.6160000e-01
  -3.7540000e-02
  -2.6180000e-02
  -1.7345000e-01
  -1.2165000e-01
  -8.6530000e-02
   6.5280000e-02
   1.0910000e-01
  -6.3940000e-02
   3.1010000e-02
   5.8480000e-02
   1.2061000e-01
   1.5598000e-01
  -9.4240000e-02
  -5.5330000e-02
   1.0611000e-01
   5.1440000e-02
   2.9060000e-02
  -1.0833000e-01
  -1.3682000e-01
   5.4370000e-02
   3.2930000e-02
  -7.0270000e-02
  -1.5913000e-01
  -1.0298000e-01
   1.1886000e-01
   5.8290000e-02
  -4.4720000e-02
  -4.2470000e-02
   2.4100000e-02
   1.9294000e-01
   1.0381000e-01
  -4.7760000e-02
  -3.6190000e-02
  -1.7520000e-02
   6.7890000e-02
  -6.2800000e-03
  -1.5031000e-01
  -7.1640000e-02
  -9.7600000e-03
  -7.9200000e-03
  -5.8460000e-02
  -1.2220000e-01
  -6.0480000e-02
   9.9280000e-02
   9.5310000e-02
   4.5200000e-03
   2.4570000e-02
   1.1368000e-01
   1.1875000e-01
   6.1470000e-02
  -1.1030000e-01
  -1.1549000e-01
   1.9030000e-02
   4.0330000e-02
  -1.1518000e-01
  -1.3224000e-01
  -4.8310000e-02
   9.0150000e-02
   3.7950000e-02
  -4.6360000e-02
  -2.3940000e-02
   4.6800000e-02
   1.7452000e-01
   5.0890000e-02
  -5.2450000e-02
   2.2430000e-02
   1.1030000e-01
   5.3080000e-02
  -9.1900000e-03
  -7.0050000e-02
  -2.0620000e-02
   4.1150000e-02
  -1.9800000e-02
  -1.3273000e-01
  -7.6220000e-02
  -4.0220000e-02
  -1.6090000e-02
  -1.3400000e-03
  -8.7460000e-02
   3.7070000e-02
   7.8420000e-02
   9.1710000e-02
   9.7720000e-02
   8.8800000e-03
   2.0340000e-02
   1.3742000e-01
  -1.0360000e-02
  -1.1540000e-02
  -4.2500000e-02
  -1.1538000e-01
   5.6920000e-02
  -6.3140000e-02
  -1.2588000e-01
  -2.1660000e-02
  -7.3210000e-02
   2.1000000e-02
   8.4200000e-03
  -1.0356000e-01
   7.1620000e-02
   3.5530000e-02
   4.4690000e-02
   4.0940000e-02
  -7.6520000e-02
   5.9610000e-02
   7.8310000e-02
   4.8280000e-02
   8.2990000e-02
  -2.8190000e-02
   1.8210000e-02
   2.4480000e-02
  -8.6450000e-02
  -4.4030000e-02
  -1.8743000e-01
  -1.2769000e-01
   3.3120000e-02
  -5.1880000e-02
  -1.1430000e-02
   4.6600000e-03
  -1.3740000e-02
   1.7180000e-01
  -1.6200000e-03
  -5.1220000e-02
   1.0866000e-01
   1.5660000e-02
   8.2910000e-02
   2.4730000e-02
  -8.4560000e-02
   6.2460000e-02
   1.7630000e-02
  -1.1760000e-02
  -5.1300000e-02
  -1.2708000e-01
   3.0540000e-02
  -7.2900000e-03
  -1.3610000e-01
  -5.1960000e-02
  -4.7430000e-02
   5.4180000e-02
   8.8750000e-02
  -4.3980000e-02
   1.0855000e-01
   1.5713000e-01
   8.6180000e-02
   1.1324000e-01
  -9.4480000e-02
   1.9740000e-02
   7.0570000e-02
  -8.2040000e-02
  -1.2738000e-01
  -1.4055000e-01
  -1.0852000e-01
   6.9940000e-02
  -2.9910000e-02
  -1.1340000e-01
   9.5110000e-02
   9.5360000e-02
   1.0076000e-01
   4.4200000e-02
  -2.2890000e-02
   1.4180000e-02
   7.8000000e-02
   4.6100000e-03
  -3.0380000e-02
  -6.3830000e-02
   8.8300000e-03
   3.6330000e-02
  -1.7160000e-02
  -4.9300000e-02
  -7.3450000e-02
  -1.4560000e-02
   7.1180000e-02
  -3.0400000e-03
  -1.3073000e-01
  -6.3230000e-02
   7.3510000e-02
   8.0140000e-02
  -1.4340000e-02
  -2.4790000e-02
   2.5610000e-02
   1.4910000e-01
   6.6210000e-02
  -5.8240000e-02
  -9.6870000e-02
  -5.0090000e-02
   5.7770000e-02
  -4.8750000e-02
  -1.2782000e-01
  -6.7340000e-02
   6.6400000e-03
   8.3650000e-02
  -1.8900000e-03
  -1.0054000e-01
   1.1500000e-03
   8.1190000e-02
   7.1450000e-02
   3.8140000e-02
  -8.8310000e-02
  -7.4820000e-02
   6.8630000e-02
   5.7660000e-02
  -4.9300000e-02
  -7.9540000e-02
   3.7510000e-02
   1.1239000e-01
   7.5150000e-02
  -4.3490000e-02
  -1.2703000e-01
   6.0900000e-03
   1.0123000e-01
  -1.0219000e-01
  -1.2272000e-01
  -6.3500000e-02
   8.5490000e-02
   1.5719000e-01
  -1.5520000e-02
  -3.3340000e-02
   6.6100000e-03
   1.5116000e-01
   5.7500000e-02
  -1.4288000e-01
  -7.1180000e-02
   6.6900000e-02
   4.4140000e-02
  -3.0760000e-02
  -1.4606000e-01
  -8.6810000e-02
   1.1527000e-01
   6.3560000e-02
  -8.6530000e-02
  -4.8340000e-02
   7.8910000e-02
   1.5634000e-01
   3.6300000e-02
  -1.4885000e-01
  -8.8890000e-02
   1.0570000e-01
   1.0424000e-01
  -4.6060000e-02
  -7.9510000e-02
  -2.4790000e-02
   1.1834000e-01
   1.0970000e-01
  -1.4820000e-01
  -1.1954000e-01
   2.6320000e-02
   9.0100000e-02
   5.0260000e-02
  -1.4186000e-01
  -7.2050000e-02
   1.5977000e-01
   1.2993000e-01
  -6.3390000e-02
  -1.6821000e-01
  -1.6750000e-02
   8.2470000e-02
   1.1900000e-02
  -7.5100000e-02
  -1.0145000e-01
   3.1700000e-02
   1.6922000e-01
   3.4930000e-02
  -1.4038000e-01
   1.3430000e-02
   1.1261000e-01
   8.8970000e-02
  -3.9130000e-02
  -1.8647000e-01
  -8.9850000e-02
   1.0008000e-01
   2.4160000e-02
  -1.6977000e-01
  -1.1897000e-01
   6.0370000e-02
   1.3821000e-01
   1.5550000e-02
   2.1820000e-02
   4.7160000e-02
   1.3610000e-01
   4.3980000e-02
  -1.5096000e-01
  -1.2618000e-01
   1.2670000e-02
   2.7720000e-02
  -6.5200000e-02
  -1.5626000e-01
  -2.7030000e-02
   1.0150000e-01
   9.4400000e-02
   2.8320000e-02
   5.5900000e-03
   7.7260000e-02
   1.2379000e-01
   8.5800000e-03
  -7.3180000e-02
  -5.8780000e-02
  -1.1520000e-02
   1.5820000e-02
  -4.2880000e-02
  -1.4586000e-01
  -4.4940000e-02
   1.0929000e-01
   6.8900000e-02
  -1.0090000e-02
   1.5410000e-02
   7.8170000e-02
   8.3840000e-02
   4.3840000e-02
  -7.4600000e-02
  -4.8970000e-02
   3.5370000e-02
   4.4550000e-02
  -6.2540000e-02
  -8.7520000e-02
  -5.5900000e-03
   4.4310000e-02
  -3.1000000e-03
  -5.5630000e-02
  -5.3790000e-02
   9.7830000e-02
   5.9880000e-02
  -5.6800000e-03
  -2.2370000e-02
  -2.0430000e-02
   7.3230000e-02
  -3.5400000e-03
  -1.0087000e-01
  -3.5900000e-03
   3.5290000e-02
  -3.0820000e-02
  -3.8880000e-02
   1.5100000e-03
   3.0430000e-02
   5.9390000e-02
   1.9660000e-02
  -1.0400000e-01
   3.1260000e-02
   1.1225000e-01
  -3.5620000e-02
   2.0400000e-02
  -8.6180000e-02
  -6.6790000e-02
   1.1965000e-01
  -9.5100000e-03
  -8.7220000e-02
  -6.8710000e-02
   9.3200000e-03
   7.2250000e-02
   3.8900000e-03
  -1.1296000e-01
  -7.0900000e-02
   5.0530000e-02
   9.6620000e-02
  -4.2990000e-02
  -4.0960000e-02
   6.1140000e-02
   1.5072000e-01
   1.3150000e-01
  -4.6390000e-02
  -8.8480000e-02
  -2.1900000e-03
   3.8330000e-02
  -4.2740000e-02
  -1.8611000e-01
  -8.1510000e-02
   4.5760000e-02
   2.6950000e-02
  -2.0370000e-02
  -7.2740000e-02
   6.7940000e-02
   1.2999000e-01
   3.9180000e-02
  -3.3590000e-02
  -6.9810000e-02
   6.9720000e-02
   1.2560000e-01
  -7.8800000e-02
  -5.7300000e-02
  -9.4900000e-03
   9.9660000e-02
   1.6221000e-01
  -9.1380000e-02
  -1.0882000e-01
  -1.5080000e-02
   8.8780000e-02
   1.6450000e-02
  -1.8685000e-01
  -1.1425000e-01
   2.2590000e-02
   8.0280000e-02
   3.3480000e-02
  -1.0419000e-01
   1.2830000e-02
   1.9349000e-01
   9.1960000e-02
   2.6350000e-02
  -1.1304000e-01
  -3.0000000e-02
   1.3232000e-01
   1.3850000e-02
  -1.1107000e-01
  -9.7030000e-02
  -3.2630000e-02
   1.3641000e-01
  -8.7700000e-03
  -1.0290000e-01
  -1.6340000e-02
   4.2740000e-02
   1.0526000e-01
  -2.5770000e-02
  -1.4778000e-01
   1.1900000e-02
   5.0970000e-02
   2.0700000e-02
   1.3400000e-03
  -1.3994000e-01
   2.8130000e-02
   1.5146000e-01
   7.2900000e-03
   9.6000000e-04
  -9.1770000e-02
   9.8400000e-03
   1.0751000e-01
  -2.6320000e-02
  -4.4880000e-02
  -3.0050000e-02
  -1.9200000e-03
   1.4252000e-01
  -6.1400000e-03
  -5.1490000e-02
  -2.5000000e-04
  -1.1950000e-02
   9.2810000e-02
  -3.9020000e-02
  -1.1601000e-01
  -8.1400000e-03
   7.3700000e-02
  -4.5500000e-03
  -6.3770000e-02
  -6.0730000e-02
   4.6560000e-02
   7.4440000e-02
   8.8300000e-03
  -8.0470000e-02
  -5.8840000e-02
   6.6870000e-02
   8.9030000e-02
   1.6150000e-02
  -1.1444000e-01
   4.2500000e-03
   1.1411000e-01
   1.6040000e-02
  -7.3810000e-02
  -8.6230000e-02
  -1.1477000e-01
   8.3650000e-02
  -2.5120000e-02
  -1.3501000e-01
  -1.7600000e-02
   5.4670000e-02
   1.0896000e-01
   6.0510000e-02
  -3.4660000e-02
   5.9220000e-02
   1.5702000e-01
   6.0480000e-02
  -2.3850000e-02
  -1.0827000e-01
   7.8100000e-03
  -2.9750000e-02
  -5.7060000e-02
  -6.2160000e-02
  -1.0046000e-01
  -3.1800000e-03
   1.0350000e-01
   2.4210000e-02
  -1.0940000e-02
   2.6290000e-02
   3.8440000e-02
   4.7650000e-02
   4.1100000e-03
  -1.4180000e-02
  -3.8390000e-02
  -2.9670000e-02
   2.9360000e-02
  -7.4000000e-04
  -4.0600000e-03
   1.5410000e-02
   3.1340000e-02
   2.1390000e-02
  -1.4310000e-02
  -3.7650000e-02
  -3.4550000e-02
  -4.2580000e-02
  -2.1030000e-02
  -6.5860000e-02
  -1.4340000e-02
   3.5670000e-02
   2.0180000e-02
   8.9330000e-02
   1.7000000e-03
   4.0610000e-02
   9.2150000e-02
   3.8770000e-02
  -2.2070000e-02
  -2.8460000e-02
  -6.0870000e-02
  -4.2800000e-03
  -1.0530000e-02
  -2.9390000e-02
  -3.6440000e-02
  -2.4320000e-02
   7.8030000e-02
   2.5030000e-02
  -7.5700000e-02
  -1.0433000e-01
  -1.9080000e-02
  -2.3420000e-02
   8.9700000e-03
  -5.7500000e-02
   9.7900000e-03
   1.5694000e-01
   4.4140000e-02
   7.3200000e-03
   4.2140000e-02
  -2.0650000e-02
   7.3700000e-02
  -3.3480000e-02
  -1.4682000e-01
  -1.3430000e-02
  -2.1690000e-02
  -9.1000000e-03
   6.3610000e-02
  -6.8790000e-02
  -7.1000000e-04
   9.7550000e-02
   1.8010000e-02
  -2.5000000e-04
   3.6500000e-03
   2.5910000e-02
   2.0870000e-02
   2.6790000e-02
  -1.9490000e-02
  -3.1390000e-02
   4.3730000e-02
  -8.1570000e-02
  -1.4965000e-01
   3.0190000e-02
   4.7790000e-02
   3.4030000e-02
   4.2360000e-02
  -4.4120000e-02
   6.9890000e-02
   1.7838000e-01
  -6.0020000e-02
  -5.5850000e-02
   5.0420000e-02
   2.9580000e-02
   6.7860000e-02
  -1.1710000e-01
  -1.5247000e-01
   2.7360000e-02
   6.1090000e-02
  -9.1820000e-02
  -7.4000000e-02
  -1.3820000e-02
   1.0131000e-01
   9.0120000e-02
  -3.9210000e-02
  -3.5310000e-02
   7.1510000e-02
   7.8850000e-02
   5.6200000e-03
  -5.8540000e-02
   1.0010000e-02
   6.4240000e-02
  -8.2230000e-02
  -1.0860000e-02
  -7.7180000e-02
  -2.7750000e-02
   1.0394000e-01
  -4.1760000e-02
  -1.4784000e-01
  -2.6160000e-02
  -4.2770000e-02
   2.9470000e-02
   4.1480000e-02
  -3.3970000e-02
   7.0570000e-02
   1.2930000e-01
   1.0378000e-01
  -1.3092000e-01
  -6.1910000e-02
   6.6350000e-02
   2.0920000e-02
   1.3930000e-02
  -5.3960000e-02
  -1.0704000e-01
   1.0622000e-01
   7.1730000e-02
  -3.9760000e-02
  -1.6340000e-02
  -4.8530000e-02
   2.5800000e-02
   1.0167000e-01
  -5.8290000e-02
  -3.0850000e-02
   2.4620000e-02
   2.5090000e-02
   2.2700000e-02
  -8.9660000e-02
  -4.6280000e-02
   1.4890000e-02
   2.3220000e-02
  -6.7400000e-03
  -1.0742000e-01
  -1.6670000e-02
   7.2800000e-02
  -2.9060000e-02
   2.3740000e-02
  -2.8760000e-02
   8.7700000e-03
   1.0666000e-01
  -4.6040000e-02
  -3.8850000e-02
  -1.5820000e-02
   6.5500000e-03
   7.3040000e-02
  -1.8700000e-02
  -9.3930000e-02
   1.9000000e-04
   6.0540000e-02
   9.6650000e-02
  -9.7300000e-03
  -3.6160000e-02
   4.8610000e-02
   7.3230000e-02
   8.1620000e-02
  -5.0890000e-02
  -1.0416000e-01
  -8.1200000e-03
   4.8500000e-02
   1.0690000e-02
  -7.0190000e-02
  -9.1770000e-02
   1.8370000e-02
   7.0660000e-02
   3.5230000e-02
  -3.9510000e-02
  -2.7450000e-02
   7.9270000e-02
   8.3130000e-02
   3.9760000e-02
  -3.9700000e-02
   5.1500000e-03
   2.0040000e-02
   3.7000000e-03
  -1.2690000e-02
  -6.1090000e-02
  -2.4730000e-02
  -5.4600000e-03
  -1.5790000e-02
  -8.7960000e-02
  -1.4167000e-01
  -1.9580000e-02
   2.4100000e-03
  -4.4440000e-02
  -1.1840000e-02
   8.1570000e-02
   9.4780000e-02
   1.2237000e-01
   5.2590000e-02
   3.8170000e-02
   5.9830000e-02
   2.7420000e-02
   2.0560000e-02
  -1.2610000e-01
  -2.1751000e-01
  -1.7000000e-02
  -1.2230000e-02
  -1.0526000e-01
  -3.2020000e-02
  -7.6140000e-02
   4.8200000e-02
   1.2930000e-01
   4.6170000e-02
   2.4460000e-02
   8.3380000e-02
   6.1750000e-02
   9.2260000e-02
   2.3910000e-02
  -4.9350000e-02
  -3.8770000e-02
  -1.2053000e-01
  -4.2420000e-02
  -8.7900000e-02
  -6.4930000e-02
   2.9390000e-02
  -2.9890000e-02
  -8.5500000e-03
   1.0098000e-01
   7.7000000e-03
   8.8920000e-02
   1.0051000e-01
  -2.5500000e-02
   7.8090000e-02
   8.2500000e-03
  -1.3650000e-02
   8.6090000e-02
  -5.2480000e-02
  -3.0460000e-02
  -1.7960000e-02
  -4.9410000e-02
   4.8720000e-02
  -3.3090000e-02
  -1.7250000e-02
   3.8500000e-02
  -4.4990000e-02
   5.7030000e-02
  -2.4650000e-02
  -9.3390000e-02
   2.1410000e-02
  -2.3690000e-02
  -1.3160000e-02
   1.0310000e-02
  -4.2640000e-02
   5.4150000e-02
  -1.9740000e-02
  -1.9880000e-02
   4.6610000e-02
   3.0350000e-02
   5.6180000e-02
  -4.3510000e-02
  -2.0150000e-02
   8.5870000e-02
  -2.2350000e-02
  -4.4690000e-02
  -9.7770000e-02
  -1.4655000e-01
   6.0320000e-02
   1.2560000e-02
  -8.4150000e-02
   3.7320000e-02
   6.2810000e-02
   5.7880000e-02
   1.2802000e-01
  -3.5480000e-02
   5.3200000e-03
   5.0720000e-02
   2.0780000e-02
  -4.7380000e-02
  -9.8160000e-02
  -1.1380000e-02
   2.7530000e-02
   1.8600000e-03
   2.2200000e-03
  -3.6550000e-02
   1.4700000e-02
   4.6530000e-02
  -6.0320000e-02
  -6.6650000e-02
  -2.0970000e-02
  -1.5630000e-02
  -1.2560000e-02
  -2.0590000e-02
   2.1100000e-03
   7.6880000e-02
   3.6050000e-02
   4.8800000e-03
   3.5640000e-02
   8.0340000e-02
   7.0790000e-02
  -4.7570000e-02
  -6.7810000e-02
  -5.3850000e-02
  -4.3840000e-02
  -6.9230000e-02
  -6.1960000e-02
  -2.4100000e-03
   6.3230000e-02
   1.2670000e-02
   3.5040000e-02
   8.6400000e-03
   3.1610000e-02
   1.0356000e-01
  -6.2020000e-02
  -4.6470000e-02
   2.5390000e-02
  -9.2700000e-03
   1.5000000e-02
  -5.2900000e-03
   6.5500000e-03
   8.9600000e-02
   2.3170000e-02
  -2.0040000e-02
  -2.3610000e-02
  -2.6270000e-02
   4.3400000e-02
  -3.6990000e-02
  -5.1050000e-02
  -3.5340000e-02
  -2.4240000e-02
   2.6070000e-02
   2.7560000e-02
  -1.4810000e-02
   2.5120000e-02
   4.4910000e-02
   3.3180000e-02
   5.7500000e-02
  -5.2200000e-02
   9.8700000e-03
   5.5690000e-02
  -1.0690000e-02
  -8.0660000e-02
  -7.8580000e-02
   1.2640000e-02
   1.7000000e-02
  -6.2650000e-02
  -4.0300000e-02
  -3.5340000e-02
   8.0910000e-02
   4.3100000e-02
  -9.3550000e-02
   1.3520000e-02
   5.4970000e-02
   1.0610000e-02
   1.4920000e-02
  -4.0000000e-02
   9.4600000e-03
   1.3561000e-01
   1.8900000e-03
  -7.9700000e-02
  -4.4090000e-02
  -3.0000000e-05
   4.3870000e-02
  -6.1010000e-02
  -1.8022000e-01
  -2.0920000e-02
   4.6560000e-02
  -8.8300000e-03
   7.2400000e-03
  -5.8780000e-02
   7.2990000e-02
   1.4151000e-01
  -4.6720000e-02
  -4.4280000e-02
  -2.8200000e-03
   9.9340000e-02
   9.6270000e-02
  -1.3035000e-01
  -4.6670000e-02
   3.5100000e-02
   9.1600000e-02
   5.0970000e-02
  -1.2442000e-01
  -1.8670000e-02
   1.1768000e-01
   4.4340000e-02
   3.9320000e-02
  -1.2774000e-01
  -6.4020000e-02
   1.8332000e-01
  -3.9650000e-02
  -8.4500000e-02
  -3.6960000e-02
   6.7200000e-03
   1.3440000e-01
   1.1380000e-02
  -1.1055000e-01
  -2.3310000e-02
   1.7520000e-02
   8.9680000e-02
   7.5100000e-03
  -1.1971000e-01
   5.0180000e-02
   8.5790000e-02
   7.7620000e-02
  -7.9430000e-02
  -1.2434000e-01
   2.0340000e-02
  -1.6560000e-02
  -1.3650000e-02
  -4.9710000e-02
  -1.3081000e-01
   6.7700000e-02
   9.9360000e-02
  -3.5780000e-02
   5.1350000e-02
  -5.8020000e-02
   3.8660000e-02
   8.1840000e-02
  -1.8810000e-02
  -1.9740000e-02
  -7.6200000e-02
   2.8080000e-02
   1.8559000e-01
  -9.8870000e-02
  -1.1387000e-01
  -5.2100000e-03
  -7.3500000e-03
   1.1677000e-01
  -1.0995000e-01
  -1.4970000e-01
   4.8300000e-03
   6.9200000e-02
   1.4000000e-03
  -4.5130000e-02
  -1.0232000e-01
   4.5130000e-02
   1.1165000e-01
   3.4520000e-02
  -4.7200000e-03
  -1.1100000e-02
   1.2618000e-01
   7.6580000e-02
  -4.7630000e-02
  -8.8480000e-02
  -9.0010000e-02
   5.6120000e-02
   8.3350000e-02
  -8.2560000e-02
  -1.2379000e-01
  -2.0950000e-02
   8.2420000e-02
   1.0984000e-01
  -7.3370000e-02
  -5.9690000e-02
   7.1700000e-02
   1.0424000e-01
   8.4200000e-02
  -1.1211000e-01
  -7.3290000e-02
   9.4890000e-02
   5.6450000e-02
  -1.0328000e-01
  -1.1209000e-01
   1.3490000e-02
   7.0110000e-02
   4.5100000e-02
  -9.2700000e-02
  -8.6310000e-02
   1.1189000e-01
   9.1800000e-02
   1.0670000e-02
  -4.5050000e-02
  -3.8880000e-02
   1.1121000e-01
   6.3750000e-02
  -8.7850000e-02
  -7.3860000e-02
  -1.0860000e-02
   4.9740000e-02
  -8.0100000e-03
  -1.2143000e-01
  -6.8710000e-02
   8.2060000e-02
   9.0860000e-02
  -1.3350000e-02
  -1.2821000e-01
  -2.7140000e-02
   1.2684000e-01
   8.5300000e-03
  -4.2940000e-02
  -5.2600000e-03
   7.2190000e-02
   9.6130000e-02
  -3.1810000e-02
  -1.0046000e-01
   4.6800000e-02
   7.4910000e-02
  -6.1860000e-02
  -7.3860000e-02
  -5.1880000e-02
   7.1530000e-02
   2.0340000e-02
  -1.1675000e-01
  -8.4060000e-02
   2.9200000e-02
   8.2670000e-02
   1.8230000e-02
  -1.0537000e-01
   2.2890000e-02
   1.7306000e-01
   1.9500000e-03
  -5.5190000e-02
  -5.2780000e-02
   3.6660000e-02
   1.2771000e-01
  -2.0020000e-02
  -1.5716000e-01
  -9.0590000e-02
   6.0000000e-03
   3.8520000e-02
  -7.3950000e-02
  -9.2950000e-02
   1.5660000e-02
   8.6420000e-02
   8.9490000e-02
  -3.1500000e-03
  -1.2120000e-02
   1.1653000e-01
   5.6510000e-02
  -4.9100000e-03
  -1.7550000e-02
  -6.9560000e-02
   4.7540000e-02
  -3.7120000e-02
  -1.2919000e-01
  -7.0770000e-02
  -5.1000000e-03
   2.0290000e-02
   7.2710000e-02
  -6.9000000e-04
   2.5640000e-02
   1.1713000e-01
   4.9600000e-02
  -1.5570000e-02
  -2.8050000e-02
   2.9260000e-02
  -1.0910000e-02
  -1.0990000e-02
  -2.9470000e-02
  -2.6270000e-02
  -2.0120000e-02
  -8.8600000e-03
  -5.2730000e-02
  -8.0100000e-03
   5.7740000e-02
  -3.5620000e-02
   2.2870000e-02
  -3.6470000e-02
  -4.7630000e-02
   2.2500000e-03
  -3.4300000e-02
   8.1200000e-03
   8.3930000e-02
   5.9960000e-02
   1.0838000e-01
   3.9210000e-02
   5.0120000e-02
   5.9140000e-02
  -7.2270000e-02
   2.0400000e-02
  -3.4990000e-02
  -1.0518000e-01
  -8.2610000e-02
  -8.8450000e-02
  -5.0480000e-02
  -2.5090000e-02
  -4.2250000e-02
  -2.9010000e-02
   5.4970000e-02
  -1.1460000e-02
   7.4000000e-03
   1.1058000e-01
   4.7160000e-02
   7.0520000e-02
   4.8690000e-02
  -7.9500000e-03
   4.6900000e-03
   5.1270000e-02
  -7.8280000e-02
  -9.7770000e-02
  -1.1490000e-02
  -7.7900000e-03
   8.0000000e-04
   4.2440000e-02
  -8.3650000e-02
  -1.2152000e-01
   2.6730000e-02
   5.9090000e-02
  -2.8600000e-02
  -2.5580000e-02
  -2.0840000e-02
   6.9670000e-02
   1.1485000e-01
   3.3000000e-04
  -2.0560000e-02
   6.5890000e-02
   8.5850000e-02
  -1.3000000e-02
  -2.8350000e-02
  -2.7860000e-02
  -4.8830000e-02
  -6.3420000e-02
  -2.5940000e-02
  -9.9420000e-02
  -2.5750000e-02
  -2.3740000e-02
  -3.1310000e-02
   5.3470000e-02
   7.6800000e-03
   7.2100000e-03
   1.1924000e-01
   7.1590000e-02
   2.0670000e-02
  -8.6900000e-03
  -5.2900000e-03
   4.3730000e-02
  -1.1050000e-02
  -1.2480000e-02
  -1.0413000e-01
  -7.0700000e-03
   5.3110000e-02
  -8.0530000e-02
  -2.6430000e-02
   1.6530000e-02
   6.3600000e-03
  -3.2400000e-03
  -7.2160000e-02
   8.9700000e-03
   4.3210000e-02
   2.1520000e-02
   3.2960000e-02
  -6.6350000e-02
   6.3060000e-02
   9.8540000e-02
  -2.2150000e-02
   1.3630000e-02
  -6.5830000e-02
   1.9330000e-02
   9.1030000e-02
  -1.3838000e-01
  -1.2939000e-01
  -6.0300000e-03
   4.5200000e-03
   1.6420000e-02
  -8.1790000e-02
  -6.0320000e-02
   6.9560000e-02
   9.6790000e-02
   1.3400000e-03
  -4.9900000e-02
   4.7540000e-02
   1.1941000e-01
   2.4160000e-02
  -4.1900000e-03
  -6.0050000e-02
  -4.4200000e-02
   9.3470000e-02
  -1.0844000e-01
  -9.1880000e-02
  -8.0300000e-03
  -4.2220000e-02
   4.7410000e-02
  -7.9800000e-03
  -5.2830000e-02
   7.9290000e-02
   1.6260000e-02
   6.7310000e-02
   7.3010000e-02
  -1.9270000e-02
   5.3030000e-02
  -2.2510000e-02
  -7.7600000e-03
   6.5780000e-02
  -1.2020000e-01
  -5.9220000e-02
  -8.6100000e-03
  -8.1460000e-02
   2.1360000e-02
  -8.1460000e-02
  -1.3630000e-02
   1.5214000e-01
   3.2550000e-02
   5.2370000e-02
  -5.8900000e-03
  -4.6830000e-02
   9.1930000e-02
  -1.4180000e-02
  -5.8430000e-02
  -1.3190000e-02
   3.3340000e-02
   6.2900000e-02
   1.1350000e-02
  -7.0140000e-02
   1.9140000e-02
  -1.6040000e-02
  -2.7450000e-02
  -5.3160000e-02
  -1.4622000e-01
  -2.7880000e-02
   3.2790000e-02
   1.6780000e-02
   4.1100000e-02
  -4.0000000e-03
   5.0310000e-02
   1.7586000e-01
   4.6170000e-02
   3.2900000e-02
  -1.9080000e-02
  -2.9060000e-02
   9.6500000e-03
  -6.1960000e-02
  -1.2239000e-01
  -9.1990000e-02
  -3.5700000e-02
   3.0710000e-02
   1.5880000e-02
  -6.6160000e-02
   4.8200000e-02
   1.5061000e-01
   1.0296000e-01
  -1.7680000e-02
   2.4650000e-02
  -5.5400000e-03
   4.3320000e-02
  -1.0830000e-02
  -1.4685000e-01
  -1.1647000e-01
   1.6560000e-02
  -8.5800000e-03
  -1.9690000e-02
  -7.8880000e-02
   1.9910000e-02
   1.0411000e-01
   2.2840000e-02
   2.8900000e-02
  -1.1600000e-02
   3.9400000e-02
   6.3300000e-03
  -1.0287000e-01
  -4.2030000e-02
   8.5000000e-03
  -2.0920000e-02
  -9.5100000e-03
  -3.6160000e-02
  -2.7750000e-02
   7.1340000e-02
   1.5110000e-02
  -2.6460000e-02
  -3.4110000e-02
   2.7010000e-02
   2.2700000e-02
   5.4970000e-02
  -1.3540000e-02
   3.4820000e-02
   4.6200000e-02
   7.0200000e-03
  -5.7960000e-02
  -9.3930000e-02
   1.2910000e-02
  -1.7900000e-02
  -7.1100000e-02
  -6.1530000e-02
   1.6890000e-02
   1.0934000e-01
   6.1030000e-02
  -7.3860000e-02
   4.7870000e-02
   7.5730000e-02
   6.3560000e-02
   4.2500000e-03
  -1.3035000e-01
  -7.4250000e-02
   9.3300000e-02
   4.1540000e-02
  -5.6590000e-02
  -8.5160000e-02
   4.2090000e-02
   1.2182000e-01
   3.1480000e-02
  -2.0370000e-02
  -7.2330000e-02
   3.2270000e-02
   1.0523000e-01
  -5.6320000e-02
  -6.5090000e-02
  -2.4540000e-02
  -9.0500000e-03
   1.1878000e-01
   2.4540000e-02
  -4.3020000e-02
   2.9940000e-02
  -2.6270000e-02
   9.3800000e-03
  -7.0490000e-02
  -1.0956000e-01
   1.2340000e-02
  -1.3520000e-02
  -2.9690000e-02
  -1.4200000e-02
  -7.2100000e-03
   9.0560000e-02
   8.9960000e-02
   1.1200000e-03
  -1.1210000e-02
  -4.9460000e-02
   4.0520000e-02
  -1.0450000e-02
  -1.2678000e-01
  -7.7070000e-02
  -7.8740000e-02
   9.2400000e-03
   5.1130000e-02
  -9.0340000e-02
  -2.1580000e-02
   5.6620000e-02
   4.6200000e-02
   1.0466000e-01
  -2.7580000e-02
  -3.9150000e-02
   8.4890000e-02
   4.2830000e-02
   5.5660000e-02
  -3.7430000e-02
  -6.6740000e-02
   8.4480000e-02
   2.8210000e-02
  -5.2600000e-03
  -8.1240000e-02
  -6.5120000e-02
   6.8440000e-02
  -4.1570000e-02
  -6.9670000e-02
  -5.4300000e-03
  -9.6050000e-02
   6.2760000e-02
   9.8400000e-03
  -1.0548000e-01
   8.2970000e-02
   2.6300000e-03
   4.5190000e-02
   1.0189000e-01
  -1.9030000e-02
   2.3250000e-02
   9.0070000e-02
  -3.7260000e-02
   5.9110000e-02
   4.1700000e-03
  -6.9420000e-02
   2.2200000e-03
  -6.9480000e-02
   1.7000000e-03
  -2.4290000e-02
  -2.9450000e-02
  -6.3500000e-02
  -3.4300000e-02
   5.6480000e-02
   1.0534000e-01
   2.0760000e-02
   8.6970000e-02
   5.2730000e-02
   4.5930000e-02
   5.2830000e-02
  -8.9850000e-02
  -1.0082000e-01
  -6.2730000e-02
  -3.2410000e-02
  -1.0452000e-01
  -5.9500000e-02
  -7.8220000e-02
   7.1510000e-02
   8.1680000e-02
   9.3930000e-02
   1.0780000e-02
  -2.7910000e-02
  -6.1700000e-03
  -6.3900000e-03
   1.0860000e-02
  -5.9250000e-02
  -2.1610000e-02
   3.5860000e-02
   3.8140000e-02
  -3.6900000e-02
   1.9850000e-02
  -1.7300000e-02
  -4.0770000e-02
   4.5000000e-03
   8.5500000e-03
  -1.0100000e-03
  -1.5380000e-02
   3.1200000e-02
   1.6420000e-02
  -5.8430000e-02
   4.3490000e-02
   5.9960000e-02
   8.0660000e-02
  -1.3270000e-02
  -1.5053000e-01
   2.9600000e-03
   2.0890000e-02
   2.1390000e-02
   1.2150000e-02
  -9.7030000e-02
  -1.2230000e-02
   9.5580000e-02
  -6.9090000e-02
  -1.3110000e-02
  -2.1300000e-02
  -6.6000000e-04
   1.1554000e-01
   1.8900000e-03
  -7.6830000e-02
   8.0900000e-03
  -3.1800000e-03
   2.1170000e-02
   1.5350000e-02
  -7.1950000e-02
   1.6560000e-02
   1.8340000e-02
   1.3410000e-02
   2.1820000e-02
  -4.8200000e-02
   7.2900000e-03
   6.6210000e-02
  -4.3210000e-02
  -3.5340000e-02
  -5.6560000e-02
   8.2000000e-03
   1.4183000e-01
  -1.3960000e-02
  -9.5310000e-02
  -3.3860000e-02
   7.2880000e-02
   7.1420000e-02
  -3.2350000e-02
  -4.4990000e-02
   6.1700000e-03
   9.4760000e-02
   7.3620000e-02
  -5.9880000e-02
  -1.5255000e-01
   5.9880000e-02
   1.1505000e-01
  -4.6750000e-02
  -1.1532000e-01
  -1.2226000e-01
   2.6920000e-02
   1.5979000e-01
   5.5900000e-03
  -1.3399000e-01
   2.5610000e-02
   1.1754000e-01
   7.1860000e-02
   2.2780000e-02
  -9.6920000e-02
  -1.1551000e-01
   1.0367000e-01
   2.5880000e-02
  -9.6540000e-02
  -1.3698000e-01
  -1.1270000e-02
   1.3471000e-01
   9.0430000e-02
  -7.1970000e-02
  -1.0880000e-01
   4.9000000e-02
   1.0087000e-01
  -3.6930000e-02
  -1.2985000e-01
  -8.2390000e-02
  -5.3200000e-03
   1.3769000e-01
  -3.5640000e-02
  -5.8570000e-02
   8.5350000e-02
   1.0427000e-01
   7.2400000e-03
  -1.1460000e-02
  -1.1924000e-01
  -3.1810000e-02
   3.7670000e-02
  -3.6330000e-02
  -4.0720000e-02
  -6.1610000e-02
  -4.4530000e-02
   9.6100000e-02
   5.8760000e-02
  -3.0130000e-02
   5.5930000e-02
   5.9220000e-02
   8.6230000e-02
  -7.5100000e-03
  -3.6220000e-02
  -7.4000000e-04
   2.5610000e-02
  -1.3380000e-02
  -1.0496000e-01
  -7.1970000e-02
   8.8260000e-02
   4.6040000e-02
   4.5800000e-03
  -6.8800000e-03
  -3.6380000e-02
   6.0920000e-02
   1.7900000e-02
  -7.1950000e-02
  -1.7740000e-02
   5.4400000e-02
   2.9580000e-02
   5.0120000e-02
  -2.7660000e-02
  -2.7770000e-02
   6.3560000e-02
   4.4970000e-02
  -3.5810000e-02
  -2.6270000e-02
  -1.8590000e-02
  -4.8200000e-02
  -3.2820000e-02
  -4.6310000e-02
  -3.0130000e-02
  -1.5930000e-02
  -9.0500000e-03
  -4.7000000e-04
   3.7370000e-02
   8.2830000e-02
  -2.4290000e-02
  -6.6790000e-02
   2.8820000e-02
   2.4680000e-02
   9.9000000e-04
  -1.9440000e-02
  -4.8610000e-02
   8.0250000e-02
   8.2530000e-02
   9.9300000e-03
  -1.1410000e-02
  -3.2680000e-02
  -5.4670000e-02
  -2.3800000e-02
  -4.8860000e-02
  -6.9610000e-02
  -8.1320000e-02
  -7.5430000e-02
   4.9100000e-03
   2.6490000e-02
  -1.1650000e-02
   4.3840000e-02
   9.9530000e-02
   7.0900000e-02
   1.6207000e-01
   4.3570000e-02
   8.0000000e-04
   7.9540000e-02
  -9.2400000e-03
  -4.1980000e-02
  -1.2335000e-01
  -1.0997000e-01
  -2.5060000e-02
  -1.1428000e-01
  -9.7310000e-02
  -6.5390000e-02
  -3.0790000e-02
   8.8010000e-02
   7.3500000e-03
   6.3120000e-02
   8.2990000e-02
   5.4890000e-02
   1.1505000e-01
   5.5960000e-02
   2.1820000e-02
   6.4510000e-02
  -6.4240000e-02
  -2.1630000e-02
   5.8400000e-03
  -3.4570000e-02
   3.2900000e-03
  -8.1510000e-02
  -6.8300000e-02
  -4.6990000e-02
  -8.0420000e-02
   1.1490000e-02
   8.5500000e-03
   5.4300000e-03
   1.0959000e-01
   2.8870000e-02
   2.0920000e-02
   7.1420000e-02
   4.7190000e-02
   3.9620000e-02
  -2.2320000e-02
  -1.0860000e-02
  -1.7960000e-02
  -6.7700000e-03
  -2.1110000e-02
  -5.1490000e-02
   1.3870000e-02
   3.2550000e-02
  -1.8100000e-02
  -2.3600000e-03
  -2.1400000e-03
   4.9900000e-03
   5.6800000e-03
  -7.3670000e-02
  -4.2470000e-02
  -3.6080000e-02
   1.5680000e-02
  -2.1500000e-02
  -3.7320000e-02
   8.7330000e-02
   8.3600000e-02
   1.6420000e-02
   1.9000000e-02
  -2.5280000e-02
  -3.5890000e-02
   3.0240000e-02
  -5.3520000e-02
  -1.1225000e-01
  -1.0882000e-01
  -4.1700000e-03
   3.6630000e-02
  -5.5440000e-02
  -7.9810000e-02
   6.0180000e-02
   1.1568000e-01
   9.4760000e-02
  -3.4850000e-02
  -3.0350000e-02
   7.1510000e-02
   7.7260000e-02
  -4.0880000e-02
  -1.3994000e-01
  -3.7620000e-02
   5.5770000e-02
   1.2170000e-02
  -4.3700000e-02
  -1.0657000e-01
   7.1640000e-02
   1.0688000e-01
  -1.1100000e-02
  -7.5430000e-02
  -8.0970000e-02
   8.7820000e-02
   1.5550000e-02
  -8.5710000e-02
   1.6620000e-02
   5.8840000e-02
   1.2634000e-01
   1.0526000e-01
  -9.4590000e-02
  -6.8500000e-03
   8.7300000e-02
  -1.9800000e-02
  -4.2940000e-02
  -8.7050000e-02
  -9.7060000e-02
   7.1800000e-03
  -8.5000000e-03
  -4.5000000e-03
  -6.9000000e-04
   7.1310000e-02
   1.1439000e-01
   8.1130000e-02
   8.3650000e-02
   2.1390000e-02
  -3.5070000e-02
   3.6330000e-02
  -5.7110000e-02
  -1.5845000e-01
  -5.3360000e-02
   1.0860000e-02
   8.1700000e-03
  -5.8670000e-02
  -2.9060000e-02
   3.2680000e-02
   5.3630000e-02
   1.1220000e-01
   2.3000000e-02
   1.7820000e-02
   1.2692000e-01
  -2.7880000e-02
  -2.0300000e-03
   4.3570000e-02
  -8.6940000e-02
   3.9980000e-02
   1.7440000e-02
  -9.6570000e-02
  -5.9800000e-03
  -2.1520000e-02
  -5.9660000e-02
   7.1070000e-02
  -3.4300000e-02
  -7.3650000e-02
  -5.4100000e-02
  -5.7910000e-02
   5.3900000e-02
  -3.8630000e-02
  -2.0760000e-02
  -1.4700000e-02
   1.0819000e-01
   1.7243000e-01
  -7.9180000e-02
  -3.9450000e-02
   3.4460000e-02
  -3.1010000e-02
   3.2760000e-02
  -1.1672000e-01
  -1.5683000e-01
   9.3060000e-02
   4.2660000e-02
  -9.1330000e-02
  -9.2120000e-02
  -1.6070000e-02
   9.1000000e-02
   4.1040000e-02
  -6.2180000e-02
  -1.0408000e-01
   1.8450000e-02
   1.2947000e-01
   2.0950000e-02
  -6.7940000e-02
  -3.9700000e-02
  -1.5100000e-03
   1.5922000e-01
   4.9000000e-02
  -1.3438000e-01
   5.0700000e-03
   9.5960000e-02
  -1.4860000e-02
  -5.7440000e-02
  -1.3196000e-01
  -6.3830000e-02
   8.0580000e-02
   3.5700000e-02
  -4.1790000e-02
   2.4700000e-03
   1.5689000e-01
   1.6284000e-01
   5.9030000e-02
  -1.2300000e-03
  -5.1520000e-02
   1.2500000e-02
   5.3740000e-02
  -1.0860000e-01
  -1.4485000e-01
   2.3900000e-03
   3.8030000e-02
   2.9280000e-02
  -6.5000000e-03
  -6.8870000e-02
   1.0391000e-01
   1.6802000e-01
  -1.3410000e-02
  -7.6390000e-02
  -3.6700000e-03
   3.0570000e-02
   6.0130000e-02
  -5.9170000e-02
  -1.3736000e-01
  -2.2780000e-02
   1.8700000e-02
   2.6920000e-02
  -8.6310000e-02
  -3.8960000e-02
   5.3630000e-02
   8.6260000e-02
   6.9860000e-02
  -5.8150000e-02
  -7.6800000e-03
   5.5630000e-02
   1.7300000e-03
  -1.2300000e-03
  -8.2720000e-02
  -5.7850000e-02
   6.4300000e-02
  -9.1800000e-02
  -2.6600000e-02
  -2.1400000e-03
  -6.2510000e-02
   7.6880000e-02
   2.7690000e-02
   7.9200000e-03
   8.0420000e-02
  -3.3450000e-02
   5.3880000e-02
   6.4240000e-02
  -6.9970000e-02
  -3.8000000e-04
  -7.0490000e-02
  -6.5010000e-02
   2.2200000e-03
  -1.1030000e-01
  -6.2540000e-02
  -2.7100000e-03
   4.8910000e-02
   7.1530000e-02
  -7.5430000e-02
  -3.7450000e-02
   7.8110000e-02
   1.3062000e-01
  -7.1000000e-04
  -7.8740000e-02
  -4.8670000e-02
   1.3879000e-01
   4.1130000e-02
  -7.2820000e-02
  -4.0170000e-02
  -3.0520000e-02
   7.6330000e-02
   4.4660000e-02
  -1.1518000e-01
  -8.8670000e-02
   2.3880000e-02
   3.7260000e-02
   4.6230000e-02
  -7.2050000e-02
   4.5380000e-02
   7.8500000e-02
   7.3920000e-02
  -1.4750000e-02
  -9.0840000e-02
   4.0190000e-02
   1.2434000e-01
  -4.4800000e-02
  -5.2560000e-02
  -9.1960000e-02
   9.2400000e-03
   1.2640000e-01
  -1.5960000e-01
  -1.2686000e-01
   1.8290000e-02
   1.2780000e-01
   6.6190000e-02
   2.5090000e-02
  -1.7930000e-02
   8.2250000e-02
   1.4381000e-01
  -3.1780000e-02
  -1.0435000e-01
   9.6500000e-03
   1.6830000e-02
   1.9170000e-02
  -1.9520000e-02
  -1.2958000e-01
   1.2600000e-03
   8.1950000e-02
   3.0900000e-02
  -6.6540000e-02
  -1.8480000e-02
   4.2110000e-02
   8.3980000e-02
   9.2700000e-03
  -1.1562000e-01
  -4.7210000e-02
   1.0424000e-01
   3.4350000e-02
  -5.1790000e-02
  -3.5150000e-02
  -3.4680000e-02
   7.1120000e-02
   2.7450000e-02
  -7.2600000e-02
  -5.9030000e-02
  -2.3720000e-02
   2.0600000e-03
   2.1100000e-03
  -7.0190000e-02
  -3.6880000e-02
   4.2220000e-02
   1.3177000e-01
  -1.8510000e-02
  -8.1080000e-02
   2.7470000e-02
   5.0150000e-02
   8.7030000e-02
  -1.2890000e-02
  -1.3057000e-01
  -3.0320000e-02
   2.0320000e-02
  -4.7710000e-02
  -1.0734000e-01
  -1.1129000e-01
  -3.3120000e-02
   6.7370000e-02
   5.7410000e-02
   2.7990000e-02
   2.0340000e-02
   9.7220000e-02
   1.3084000e-01
   6.2620000e-02
  -2.7500000e-02
  -7.0900000e-02
   1.7300000e-03
   1.9960000e-02
  -4.2770000e-02
  -5.9770000e-02
  -3.9540000e-02
   8.1020000e-02
   2.1080000e-02
  -3.2630000e-02
  -2.1250000e-02
   1.2800000e-02
  -1.4300000e-03
  -1.2280000e-02
  -4.1000000e-04
   2.7100000e-03
   1.6290000e-02
   4.9630000e-02
   1.1160000e-02
  -8.6400000e-03
   1.1570000e-02
  -4.9330000e-02
   5.0370000e-02
   1.2200000e-02
  -6.1310000e-02
   4.0690000e-02
  -1.4300000e-03
   1.9330000e-02
  -2.3000000e-03
  -6.0210000e-02
  -1.5710000e-02
  -2.4210000e-02
  -4.5020000e-02
   1.7850000e-02
  -1.5790000e-02
   3.9500000e-03
   4.5680000e-02
  -2.9500000e-02
   2.8270000e-02
   3.8170000e-02
  -3.5450000e-02
  -3.5600000e-03
  -5.2400000e-03
   1.9300000e-02
   2.0210000e-02
  -8.4010000e-02
  -5.2860000e-02
   1.3080000e-02
   5.3110000e-02
  -2.0560000e-02
  -1.1110000e-01
  -4.8090000e-02
   8.1460000e-02
   5.1440000e-02
  -1.2830000e-02
  -3.6330000e-02
   3.2050000e-02
   1.5996000e-01
   6.8350000e-02
  -4.6200000e-02
  -2.4980000e-02
   5.6180000e-02
   1.2385000e-01
  -4.6060000e-02
  -1.7197000e-01
  -8.2280000e-02
  -6.3100000e-03
  -1.2060000e-02
  -8.9850000e-02
  -9.7830000e-02
   3.4410000e-02
   9.6050000e-02
   8.1930000e-02
  -5.2010000e-02
  -7.8990000e-02
   1.2903000e-01
   1.4630000e-01
   5.6200000e-03
  -1.2218000e-01
  -3.7890000e-02
   1.0474000e-01
   1.0474000e-01
  -1.1595000e-01
  -7.4300000e-02
   1.5460000e-02
   1.5302000e-01
   4.6010000e-02
  -1.5195000e-01
  -1.4334000e-01
   2.9200000e-02
   8.7380000e-02
  -7.9380000e-02
  -1.4833000e-01
  -5.8810000e-02
   1.1787000e-01
   1.1510000e-01
   1.5770000e-02
  -1.0827000e-01
   5.8980000e-02
   1.7397000e-01
  -4.4700000e-03
  -7.4630000e-02
  -1.0427000e-01
  -5.7900000e-03
   7.4000000e-02
  -4.6470000e-02
  -8.2690000e-02
  -2.1440000e-02
   1.6700000e-02
   1.4458000e-01
  -1.7490000e-02
  -1.7820000e-02
   5.7800000e-02
   4.0410000e-02
   1.0427000e-01
   1.4750000e-02
  -1.2922000e-01
   2.8540000e-02
   6.6900000e-02
  -7.9290000e-02
  -9.2040000e-02
  -1.1889000e-01
  -3.2220000e-02
  -2.7000000e-04
   1.8340000e-02
  -5.9610000e-02
  -3.2980000e-02
   1.0688000e-01
   9.0950000e-02
   2.2480000e-02
  -1.2900000e-03
  -2.0230000e-02
   1.5532000e-01
   8.0660000e-02
  -6.0760000e-02
  -2.5660000e-02
  -3.9510000e-02
   1.7900000e-02
  -5.0890000e-02
  -1.1856000e-01
  -5.4560000e-02
  -1.0530000e-02
   1.2230000e-02
  -1.5490000e-02
  -5.0830000e-02
   5.0640000e-02
   3.6710000e-02
   9.0840000e-02
   5.2890000e-02
   3.6220000e-02
  -3.0000000e-05
  -5.7030000e-02
   2.0120000e-02
  -4.6970000e-02
  -1.1466000e-01
   2.2200000e-03
  -5.5400000e-03
  -5.5000000e-04
   1.0250000e-02
  -8.4970000e-02
   8.5570000e-02
   5.2560000e-02
  -5.6540000e-02
  -7.9800000e-03
   7.4000000e-04
   5.8780000e-02
   1.1870000e-02
  -2.2400000e-02
   2.0670000e-02
   6.9180000e-02
   9.3110000e-02
  -2.7830000e-02
  -8.5870000e-02
  -1.7580000e-02
   5.3500000e-03
  -6.5500000e-03
  -6.9780000e-02
  -1.1409000e-01
   2.1910000e-02
   8.0140000e-02
   3.8600000e-02
  -2.7400000e-03
   4.8830000e-02
   1.0556000e-01
   1.8590000e-02
  -3.8700000e-03
  -5.3250000e-02
  -4.9460000e-02
   4.8450000e-02
  -7.0630000e-02
  -6.9970000e-02
   1.9930000e-02
  -3.2600000e-03
   4.6600000e-03
   2.6000000e-03
  -6.0180000e-02
   4.3180000e-02
   3.2050000e-02
  -7.0630000e-02
  -6.4930000e-02
  -4.1400000e-03
   7.9070000e-02
  -1.4390000e-02
  -5.2560000e-02
   1.0890000e-02
   4.8500000e-02
   1.1354000e-01
   3.5100000e-03
  -8.3760000e-02
   2.5000000e-03
   2.0780000e-02
  -3.5590000e-02
  -2.9670000e-02
  -9.1990000e-02
   3.3860000e-02
   1.0073000e-01
  -2.5880000e-02
  -3.7400000e-02
  -5.9420000e-02
   5.1380000e-02
   7.2160000e-02
  -4.1700000e-02
  -2.9120000e-02
  -1.1240000e-02
   3.7920000e-02
   8.5080000e-02
  -6.2900000e-02
  -1.4780000e-02
   5.5630000e-02
   1.9800000e-02
   8.5300000e-03
  -5.2810000e-02
  -1.7850000e-02
   5.0390000e-02
   2.5830000e-02
  -6.7480000e-02
  -1.1730000e-02
  -4.6670000e-02
  -1.7900000e-02
   8.5540000e-02
   2.0290000e-02
  -3.1830000e-02
   6.6980000e-02
   4.8170000e-02
   3.7860000e-02
   2.5800000e-03
  -5.5270000e-02
   6.8000000e-03
   3.5890000e-02
  -1.3575000e-01
  -1.3087000e-01
   8.9900000e-03
  -6.7700000e-03
   4.1680000e-02
  -1.5520000e-02
  -7.5040000e-02
   9.8900000e-02
   1.2538000e-01
  -2.1520000e-02
  -7.9920000e-02
  -5.4320000e-02
   8.5630000e-02
   3.6380000e-02
  -1.4200000e-01
  -7.1340000e-02
   1.0990000e-02
   9.1170000e-02
   3.7260000e-02
  -6.4270000e-02
  -4.8530000e-02
   2.9970000e-02
   3.5560000e-02
   3.0700000e-03
  -8.6750000e-02
  -3.6250000e-02
   1.1990000e-01
   5.8370000e-02
  -4.4000000e-04
   6.9100000e-03
   3.8580000e-02
   1.3676000e-01
   1.4670000e-02
  -1.3986000e-01
  -6.5090000e-02
  -8.8800000e-03
   1.1320000e-02
  -4.0410000e-02
  -1.5563000e-01
  -1.9250000e-02
   8.7030000e-02
   1.0468000e-01
   4.4990000e-02
  -2.0300000e-03
   8.5330000e-02
   8.9580000e-02
   6.6900000e-03
  -3.6360000e-02
  -9.3720000e-02
  -5.1900000e-02
   4.4880000e-02
  -7.0160000e-02
  -7.6610000e-02
  -3.5480000e-02
   4.6830000e-02
   8.8290000e-02
   3.1640000e-02
  -9.6370000e-02
  -5.9550000e-02
   1.7500000e-03
   3.1610000e-02
  -6.5720000e-02
  -9.6480000e-02
   2.7940000e-02
   1.2176000e-01
   1.3481000e-01
   1.9690000e-02
  -4.7710000e-02
   5.2830000e-02
   8.7630000e-02
  -7.0990000e-02
  -7.4060000e-02
  -1.0786000e-01
  -1.3740000e-02
   8.9630000e-02
  -9.9450000e-02
  -9.6980000e-02
   1.2171000e-01
   5.4840000e-02
   1.8920000e-02
  -3.3970000e-02
  -9.7500000e-02
   1.0866000e-01
   9.2340000e-02
  -8.2690000e-02
  -6.8110000e-02
   8.7200000e-03
   1.0230000e-01
   1.1192000e-01
  -3.9430000e-02
  -6.4080000e-02
   3.5560000e-02
   3.6380000e-02
   9.5100000e-03
  -1.4052000e-01
  -1.0128000e-01
   3.5400000e-02
   5.7800000e-02
   4.4910000e-02
  -4.5980000e-02
   4.5200000e-03
   1.4814000e-01
   6.8520000e-02
  -3.2850000e-02
  -3.4600000e-02
  -7.7460000e-02
   1.0833000e-01
  -2.1850000e-02
  -1.1590000e-01
  -6.6900000e-02
  -6.4210000e-02
   6.8740000e-02
  -2.7120000e-02
  -1.3369000e-01
   6.5450000e-02
   4.8340000e-02
   3.1970000e-02
   8.2230000e-02
  -6.4350000e-02
   3.0210000e-02
   8.1620000e-02
  -1.6230000e-02
  -2.7450000e-02
  -4.1810000e-02
   2.3420000e-02
   6.2980000e-02
  -9.7280000e-02
  -2.7720000e-02
  -1.3020000e-02
   4.5270000e-02
   1.1900000e-02
  -9.5440000e-02
  -2.7310000e-02
   4.4830000e-02
   6.2730000e-02
   6.8630000e-02
  -2.4870000e-02
   3.5400000e-03
   4.2850000e-02
   1.3460000e-02
   1.0390000e-02
  -7.4800000e-02
  -2.6020000e-02
   2.9040000e-02
  -3.2080000e-02
  -4.5600000e-02
  -5.9470000e-02
  -8.2000000e-03
   8.0800000e-02
  -2.5580000e-02
  -1.1930000e-02
   4.2250000e-02
   2.3690000e-02
   2.5030000e-02
   5.7000000e-03
  -7.1810000e-02
  -4.9220000e-02
   5.2700000e-02
  -1.1680000e-02
  -7.5620000e-02
  -2.2240000e-02
   3.0020000e-02
   3.8580000e-02
   8.0390000e-02
  -3.6110000e-02
  -2.5280000e-02
   7.0990000e-02
  -7.8700000e-03
  -4.6280000e-02
  -8.8890000e-02
  -7.8580000e-02
   5.3110000e-02
   7.4000000e-03
  -4.2530000e-02
   7.3200000e-03
   2.1300000e-02
   9.0640000e-02
   4.0390000e-02
  -1.4530000e-02
   2.5330000e-02
   4.3510000e-02
  -4.1130000e-02
  -5.2730000e-02
  -3.1830000e-02
  -6.2500000e-03
   5.5710000e-02
   2.3110000e-02
  -2.2890000e-02
   2.5940000e-02
   2.9900000e-03
   4.8390000e-02
   2.3880000e-02
  -8.5080000e-02
   1.7160000e-02
  -8.5380000e-02
  -6.5390000e-02
   7.2930000e-02
  -8.1020000e-02
  -1.3200000e-03
   4.7650000e-02
   2.0020000e-02
   1.4211000e-01
  -1.7500000e-03
   2.0800000e-03
   9.9450000e-02
   1.9000000e-02
  -3.7600000e-03
  -7.8850000e-02
  -7.6770000e-02
   1.9880000e-02
  -1.5490000e-02
  -5.7470000e-02
  -9.4670000e-02
  -1.8400000e-02
   9.9770000e-02
  -1.4150000e-02
  -5.5100000e-03
   2.2950000e-02
   2.4510000e-02
   7.0790000e-02
   2.6050000e-02
  -9.8920000e-02
  -8.4700000e-03
   6.8000000e-03
   2.4430000e-02
  -9.6200000e-03
  -1.2283000e-01
  -3.4490000e-02
   1.0010000e-02
   1.1570000e-02
   3.9780000e-02
  -8.9630000e-02
  -3.7920000e-02
   1.0742000e-01
   2.7000000e-04
   7.5400000e-03
  -8.8000000e-04
   6.0730000e-02
   1.1052000e-01
  -4.0800000e-02
  -3.9510000e-02
  -4.8800000e-02
  -5.4010000e-02
   5.5690000e-02
  -1.1411000e-01
  -6.4130000e-02
   7.8090000e-02
   1.1500000e-03
  -3.0000000e-04
  -2.0120000e-02
  -8.8000000e-03
   9.6650000e-02
   6.3140000e-02
  -3.7400000e-02
  -1.2780000e-02
   7.5040000e-02
   5.7280000e-02
  -9.2450000e-02
  -8.5900000e-02
  -6.2800000e-03
   4.9380000e-02
   3.5600000e-03
  -8.1290000e-02
  -5.6210000e-02
   1.1845000e-01
   6.1640000e-02
  -3.2100000e-03
  -6.1200000e-02
  -8.0300000e-03
   7.7730000e-02
  -2.7060000e-02
  -3.6470000e-02
  -4.0740000e-02
   3.5100000e-03
   4.6090000e-02
  -4.8940000e-02
  -7.6960000e-02
   1.0940000e-02
   2.3940000e-02
   2.0230000e-02
   1.5520000e-02
   2.5500000e-03
   8.6860000e-02
   8.8120000e-02
   2.2150000e-02
   2.8240000e-02
  -6.5500000e-03
   1.0420000e-02
  -5.1900000e-02
  -8.3130000e-02
  -6.1610000e-02
  -4.5600000e-02
  -1.1800000e-03
   8.9900000e-03
  -6.3090000e-02
   2.8410000e-02
   1.8100000e-03
  -3.9200000e-03
   2.0180000e-02
  -5.6290000e-02
   1.1433000e-01
   9.6620000e-02
   1.3980000e-02
   4.8940000e-02
  -6.1880000e-02
  -3.2850000e-02
   2.5060000e-02
  -9.4370000e-02
  -4.9650000e-02
  -7.5100000e-02
  -6.2210000e-02
   3.7010000e-02
   8.0000000e-05
   6.1140000e-02
   3.6700000e-03
  -2.7060000e-02
   6.2070000e-02
  -1.9960000e-02
  -4.0740000e-02
   3.6050000e-02
  -5.9170000e-02
  -1.5930000e-02
   9.2900000e-03
  -6.2270000e-02
   2.7720000e-02
  -1.3430000e-02
   4.6010000e-02
   4.7460000e-02
   2.0760000e-02
   8.4090000e-02
   1.1190000e-02
  -3.2930000e-02
  -4.5800000e-03
  -1.2239000e-01
  -4.0940000e-02
   4.0390000e-02
  -6.0460000e-02
   6.7450000e-02
   1.9060000e-02
  -2.8900000e-02
   8.3350000e-02
  -8.4400000e-03
  -4.8610000e-02
   4.7240000e-02
  -4.6420000e-02
   1.9000000e-04
   1.1840000e-02
   2.1900000e-03
   4.6230000e-02
   3.3700000e-02
   3.2740000e-02
  -6.4460000e-02
  -2.2510000e-02
   8.5980000e-02
   1.0140000e-02
  -8.8260000e-02
  -6.1500000e-02
  -5.7280000e-02
   6.0920000e-02
   1.7660000e-02
  -9.0750000e-02
   8.4530000e-02
   8.8040000e-02
   7.0790000e-02
   5.2890000e-02
  -3.0570000e-02
  -8.8000000e-03
   8.0010000e-02
   7.1000000e-04
  -7.9350000e-02
  -1.2182000e-01
  -6.6020000e-02
   5.9990000e-02
  -5.7520000e-02
  -5.3030000e-02
  -3.9430000e-02
   3.3260000e-02
   1.2360000e-01
   1.5000000e-02
  -5.7030000e-02
  -1.8620000e-02
   1.5490000e-02
   1.0128000e-01
  -2.6320000e-02
  -1.1384000e-01
  -2.5770000e-02
   1.1680000e-02
   1.2947000e-01
   3.8400000e-03
  -1.1735000e-01
   2.1390000e-02
   5.5440000e-02
  -2.2570000e-02
  -5.8350000e-02
  -7.8140000e-02
   6.6490000e-02
   5.7740000e-02
  -4.8860000e-02
  -1.3330000e-02
  -2.5470000e-02
   6.1060000e-02
   8.0250000e-02
  -9.2780000e-02
  -7.5670000e-02
  -1.3380000e-02
   1.3710000e-02
   2.8210000e-02
  -9.2210000e-02
  -4.5760000e-02
   1.8700000e-02
   4.6830000e-02
   8.5800000e-03
  -3.0960000e-02
  -8.6900000e-03
   8.0170000e-02
   1.0328000e-01
   3.7950000e-02
  -3.5840000e-02
  -1.2750000e-02
   6.6630000e-02
  -2.8800000e-03
  -8.9630000e-02
  -5.2070000e-02
   9.6200000e-03
   3.6700000e-03
   2.6810000e-02
  -7.9620000e-02
  -1.6940000e-02
   5.3220000e-02
   5.5030000e-02
   4.2500000e-03
  -1.7990000e-02
   3.0020000e-02
   3.4740000e-02
   1.6180000e-02
  -1.0580000e-02
  -6.1500000e-02
   8.2500000e-02
   8.8940000e-02
  -4.2990000e-02
   5.3110000e-02
  -1.3410000e-02
   1.2610000e-02
   6.7200000e-02
  -3.7260000e-02
  -4.7380000e-02
  -5.7440000e-02
  -1.2632000e-01
  -2.8320000e-02
  -7.2820000e-02
  -1.9060000e-02
   4.8780000e-02
   1.7880000e-02
   1.4170000e-01
   3.9180000e-02
   5.7300000e-03
   8.7160000e-02
  -1.4090000e-02
   2.1400000e-03
  -3.9260000e-02
  -1.4935000e-01
   2.2320000e-02
  -1.8530000e-02
  -9.8240000e-02
  -2.6050000e-02
  -1.8040000e-02
   1.9800000e-02
   2.1740000e-02
  -3.8110000e-02
  -2.4350000e-02
   3.4770000e-02
   8.0200000e-02
   1.5160000e-02
  -7.4030000e-02
   2.4050000e-02
   6.0430000e-02
   6.7230000e-02
   2.0510000e-02
  -6.0680000e-02
  -2.0950000e-02
   7.6580000e-02
   8.6100000e-03
  -1.4863000e-01
  -1.2917000e-01
  -2.7280000e-02
   5.3740000e-02
  -5.9330000e-02
  -1.5253000e-01
   3.7450000e-02
   1.4650000e-01
   1.3512000e-01
  -5.0000000e-05
  -1.4530000e-02
   1.2275000e-01
   1.4732000e-01
  -5.9800000e-03
  -1.5162000e-01
  -9.0510000e-02
   8.0390000e-02
   4.2330000e-02
  -9.3060000e-02
  -1.2922000e-01
  -2.7910000e-02
   9.9690000e-02
   2.3220000e-02
  -6.1660000e-02
  -5.2750000e-02
   6.4460000e-02
   6.6110000e-02
   3.0630000e-02
  -3.0130000e-02
   2.8200000e-03
   8.8370000e-02
   2.0870000e-02
  -2.4480000e-02
  -3.2600000e-02
  -1.2340000e-02
   3.2020000e-02
   2.0730000e-02
  -1.1239000e-01
  -2.4400000e-02
  -3.6330000e-02
   1.1840000e-02
   1.1190000e-02
  -3.2270000e-02
  -3.3810000e-02
   7.0250000e-02
   8.1870000e-02
   8.0100000e-03
  -9.6510000e-02
  -3.6550000e-02
   1.2207000e-01
   3.1230000e-02
  -3.6110000e-02
  -3.6330000e-02
   3.4350000e-02
   6.2180000e-02
  -9.3200000e-03
  -8.0200000e-02
   2.4070000e-02
  -1.7600000e-02
  -9.7600000e-03
  -8.6400000e-03
  -8.6070000e-02
   6.8410000e-02
   5.9090000e-02
   7.8100000e-03
   5.6560000e-02
  -2.8760000e-02
   3.8990000e-02
   6.3770000e-02
  -8.5240000e-02
  -2.5500000e-02
  -8.0000000e-05
  -4.2060000e-02
  -5.5360000e-02
  -7.4880000e-02
  -5.8760000e-02
   3.3290000e-02
   1.6810000e-02
  -6.7700000e-03
  -1.3020000e-02
   1.0682000e-01
   7.0080000e-02
   1.4300000e-03
   4.4880000e-02
  -2.6680000e-02
  -2.0510000e-02
   5.4530000e-02
  -1.2390000e-02
  -7.1970000e-02
   5.7330000e-02
  -5.8780000e-02
  -1.2618000e-01
  -1.5570000e-02
  -7.4030000e-02
  -3.8930000e-02
   6.9260000e-02
  -2.7420000e-02
   2.4900000e-02
   9.8270000e-02
   4.2850000e-02
   1.4145000e-01
  -3.8100000e-03
  -4.4420000e-02
   7.9180000e-02
   5.0670000e-02
   1.0010000e-02
  -1.0507000e-01
  -1.8099000e-01
   6.6930000e-02
   5.8400000e-03
  -6.9150000e-02
  -3.3860000e-02
  -9.7910000e-02
   6.8380000e-02
   1.3295000e-01
  -1.7030000e-02
  -9.1600000e-03
   7.7600000e-03
   1.0660000e-01
   1.3391000e-01
  -6.0760000e-02
   9.1300000e-03
  -1.4310000e-02
   9.7600000e-03
   5.6510000e-02
  -1.1343000e-01
  -1.1381000e-01
   2.8710000e-02
   3.1810000e-02
   2.2460000e-02
  -5.9850000e-02
  -5.4400000e-02
   9.0640000e-02
  -4.4770000e-02
  -4.7460000e-02
  -8.0000000e-04
   1.8320000e-02
   9.6290000e-02
   4.2770000e-02
  -1.1540000e-02
   9.2100000e-03
  -6.0400000e-02
  -5.4640000e-02
   1.0200000e-02
  -8.8560000e-02
  -2.8730000e-02
   1.2970000e-02
  -5.4510000e-02
   2.1220000e-02
   5.1600000e-02
   9.0800000e-03
   5.5880000e-02
   4.9600000e-03
  -1.4970000e-02
   7.2410000e-02
   2.2950000e-02
  -5.5250000e-02
   2.6130000e-02
   2.2950000e-02
  -2.4460000e-02
   9.3800000e-03
  -3.7700000e-02
  -6.9370000e-02
  -4.5540000e-02
  -2.0290000e-02
  -3.5810000e-02
  -4.5980000e-02
  -3.5920000e-02
  -2.7340000e-02
   4.0030000e-02
   8.9770000e-02
   3.2960000e-02
   9.9910000e-02
   1.1713000e-01
   8.3600000e-02
   3.9540000e-02
  -1.8840000e-02
   3.7450000e-02
   6.0810000e-02
  -2.8100000e-02
  -1.2379000e-01
  -1.0561000e-01
  -1.1570000e-02
  -1.6230000e-02
  -1.0043000e-01
  -3.5070000e-02
  -4.9960000e-02
   5.0120000e-02
   7.6630000e-02
  -5.3000000e-02
   4.8610000e-02
   5.4590000e-02
   5.5660000e-02
   1.0633000e-01
  -5.7190000e-02
  -6.0920000e-02
   4.5730000e-02
  -5.1110000e-02
  -2.1280000e-02
  -1.2133000e-01
  -8.8780000e-02
   3.5700000e-02
  -6.1090000e-02
  -4.0740000e-02
   2.1770000e-02
   3.0240000e-02
   1.3087000e-01
   2.0950000e-02
  -3.8880000e-02
   8.6420000e-02
   2.3550000e-02
   4.3210000e-02
  -4.9000000e-02
  -1.2058000e-01
   7.3040000e-02
  -1.3410000e-02
  -5.5580000e-02
   6.2000000e-03
  -7.8170000e-02
   6.7810000e-02
   7.9020000e-02
  -6.1500000e-02
   1.7080000e-02
  -7.4900000e-03
   1.8040000e-02
   8.3730000e-02
  -8.4170000e-02
  -1.6450000e-02
   4.2880000e-02
   3.5730000e-02
   8.9330000e-02
  -5.7300000e-02
  -5.1000000e-02
  -1.4300000e-03
  -2.7880000e-02
  -6.8500000e-03
  -2.0950000e-02
  -2.1880000e-02
   5.6070000e-02
   4.3100000e-02
   2.3600000e-03
  -3.5600000e-03
  -6.8300000e-03
   5.1900000e-02
   3.5260000e-02
  -8.9400000e-03
  -7.1180000e-02
  -2.6790000e-02
   4.7350000e-02
  -2.8460000e-02
  -9.6460000e-02
   9.6000000e-04
   3.4660000e-02
   6.2180000e-02
   2.2840000e-02
  -7.8200000e-02
  -9.6800000e-03
   4.0110000e-02
  -1.7800000e-03
  -8.0280000e-02
  -7.6740000e-02
  -1.9630000e-02
   5.5000000e-04
   5.2310000e-02
   3.0540000e-02
  -3.2900000e-03
  -1.6120000e-02
   4.6390000e-02
   2.7250000e-02
   1.6200000e-02
  -8.6890000e-02
  -4.2060000e-02
  -2.0970000e-02
   3.1340000e-02
   1.0040000e-02
  -3.9040000e-02
   6.7530000e-02
   1.1343000e-01
   7.4190000e-02
  -3.1280000e-02
  -1.2004000e-01
  -1.8700000e-02
   6.7370000e-02
  -3.8800000e-02
  -7.7260000e-02
  -1.6591000e-01
   4.0030000e-02
   1.7312000e-01
  -2.0230000e-02
  -2.7530000e-02
   1.4810000e-02
   1.1332000e-01
   1.4145000e-01
  -3.3480000e-02
  -1.4178000e-01
  -2.4100000e-02
   6.8080000e-02
   9.4700000e-02
  -1.0644000e-01
  -5.4510000e-02
   3.0710000e-02
   3.9890000e-02
   1.2659000e-01
  -3.9150000e-02
  -8.2230000e-02
   5.0890000e-02
   4.4610000e-02
  -9.6000000e-03
  -9.8620000e-02
  -1.6632000e-01
   1.2193000e-01
   5.9940000e-02
  -1.0910000e-01
  -5.8240000e-02
  -5.3900000e-02
   1.2481000e-01
   7.7070000e-02
  -1.0216000e-01
  -5.5550000e-02
   4.1680000e-02
   3.8990000e-02
   2.6130000e-02
  -1.3731000e-01
  -4.3070000e-02
   1.1381000e-01
   9.7470000e-02
  -1.9440000e-02
  -1.0975000e-01
   3.8500000e-02
   1.0109000e-01
   2.4160000e-02
  -6.1250000e-02
  -9.1330000e-02
  -4.2470000e-02
   7.5020000e-02
  -5.4780000e-02
  -5.5410000e-02
  -8.6400000e-03
   1.5330000e-02
   9.7860000e-02
  -5.4600000e-03
  -7.1600000e-03
   5.7000000e-03
   3.5900000e-03
   2.8270000e-02
  -2.9300000e-03
  -8.8920000e-02
  -1.3790000e-02
   1.3080000e-02
   4.4660000e-02
   4.5100000e-02
  -5.8870000e-02
   1.1200000e-03
   7.9200000e-03
   6.7170000e-02
   1.0090000e-02
  -7.4800000e-02
   8.3900000e-03
   7.5180000e-02
   4.8890000e-02
   6.9400000e-03
  -1.0671000e-01
  -3.1150000e-02
   9.7330000e-02
   2.0540000e-02
  -4.5350000e-02
  -7.9510000e-02
  -8.6900000e-03
   1.1085000e-01
  -4.3070000e-02
  -9.4430000e-02
  -3.2600000e-03
   8.0600000e-03
   1.3125000e-01
   5.5490000e-02
  -7.7320000e-02
   6.7260000e-02
   3.1860000e-02
   2.5830000e-02
  -2.5580000e-02
  -1.3789000e-01
  -3.6490000e-02
  -6.0810000e-02
  -2.8320000e-02
   1.1900000e-02
  -8.5380000e-02
   6.5260000e-02
   1.4713000e-01
   2.3170000e-02
   8.9250000e-02
  -8.5500000e-03
   1.8400000e-03
   9.3170000e-02
  -2.2350000e-02
  -4.3870000e-02
  -2.9580000e-02
  -4.4530000e-02
   1.5850000e-02
  -2.4950000e-02
  -1.8860000e-02
   1.7440000e-02
   1.6400000e-02
   2.7910000e-02
  -1.9470000e-02
  -8.2470000e-02
   5.5900000e-03
   2.2950000e-02
  -1.1680000e-02
   4.6280000e-02
  -3.9150000e-02
   8.6400000e-03
   1.1987000e-01
   4.7000000e-04
  -1.3139000e-01
  -9.3190000e-02
   1.6940000e-02
   3.3940000e-02
  -1.5930000e-02
  -1.1145000e-01
  -5.5580000e-02
   1.1579000e-01
   3.2680000e-02
  -4.6450000e-02
   2.9910000e-02
  -2.2700000e-02
   4.4060000e-02
   6.8550000e-02
  -7.7020000e-02
  -6.2320000e-02
  -4.1040000e-02
  -5.3500000e-03
   3.4680000e-02
   6.5300000e-03
  -5.7550000e-02
   3.6140000e-02
   6.9260000e-02
   5.3410000e-02
  -1.7710000e-02
  -6.3060000e-02
  -3.1300000e-03
   1.0038000e-01
   2.2620000e-02
  -5.9610000e-02
  -6.0000000e-03
   5.5360000e-02
   3.9870000e-02
  -3.6330000e-02
  -6.5040000e-02
  -1.8530000e-02
   7.7480000e-02
   2.8320000e-02
  -5.3930000e-02
  -1.8890000e-02
   5.1050000e-02
   7.0740000e-02
   4.0300000e-03
  -3.3530000e-02
   7.4900000e-03
   4.3730000e-02
  -1.8970000e-02
   3.9200000e-03
  -2.6210000e-02
  -6.5090000e-02
   1.1285000e-01
   2.3580000e-02
  -6.5280000e-02
   7.4060000e-02
  -2.1440000e-02
  -1.8100000e-03
   3.8880000e-02
  -9.0700000e-02
  -7.5920000e-02
  -4.0300000e-02
   2.0290000e-02
   4.1510000e-02
  -5.6890000e-02
   1.9700000e-03
   5.6480000e-02
   4.2500000e-02
   5.2730000e-02
  -9.4260000e-02
  -1.1156000e-01
   5.4120000e-02
   6.4200000e-03
  -8.6400000e-03
  -4.3810000e-02
  -4.6560000e-02
   1.3098000e-01
   4.4770000e-02
  -5.5740000e-02
  -1.1490000e-02
   3.2600000e-03
   4.9850000e-02
  -7.2700000e-03
  -1.0419000e-01
  -6.7120000e-02
   4.8300000e-03
   7.1590000e-02
  -3.8000000e-04
  -6.3940000e-02
   8.4500000e-02
   6.8270000e-02
   5.8320000e-02
   3.5840000e-02
  -8.9630000e-02
  -1.7800000e-03
   4.2220000e-02
  -7.9510000e-02
  -1.0550000e-01
  -1.7630000e-02
   2.5640000e-02
   3.9020000e-02
   1.2010000e-02
  -2.1170000e-02
   6.3530000e-02
   1.4334000e-01
   6.8870000e-02
   1.9490000e-02
  -5.7000000e-03
   1.4340000e-02
   3.7040000e-02
  -4.0250000e-02
  -1.4438000e-01
  -9.6590000e-02
  -2.6900000e-03
   1.6200000e-03
  -5.0070000e-02
  -7.3120000e-02
   2.5120000e-02
   7.0930000e-02
   4.1590000e-02
  -3.6110000e-02
  -1.8890000e-02
   4.0990000e-02
   7.0820000e-02
   2.6900000e-03
  -4.2500000e-02
   5.5170000e-02
   4.5020000e-02
   4.8010000e-02
  -2.6400000e-02
  -8.1680000e-02
  -6.3300000e-03
  -2.6900000e-03
  -6.2320000e-02
  -4.7650000e-02
  -7.6200000e-02
   2.3990000e-02
   4.1700000e-02
  -3.3040000e-02
   6.2650000e-02
  -1.6040000e-02
   6.4600000e-02
  -9.7600000e-03
  -7.7020000e-02
   1.3736000e-01
   1.7490000e-02
  -4.1290000e-02
   9.0400000e-02
  -5.6370000e-02
  -1.2690000e-02
   5.1130000e-02
  -1.1365000e-01
   1.8590000e-02
  -2.5060000e-02
  -5.1600000e-02
   4.9100000e-03
  -5.9060000e-02
  -2.4320000e-02
  -9.2700000e-03
  -3.2020000e-02
   4.4550000e-02
   2.2260000e-02
   3.6740000e-02
   7.3480000e-02
   1.4590000e-02
   7.0820000e-02
   6.9100000e-03
  -4.3790000e-02
  -2.0840000e-02
  -5.7880000e-02
   8.4700000e-03
  -2.5690000e-02
  -9.1380000e-02
  -6.3300000e-03
  -5.2730000e-02
  -2.9890000e-02
   7.1450000e-02
   1.5790000e-02
   3.9180000e-02
  -2.1690000e-02
  -1.8750000e-02
   4.7710000e-02
   3.2020000e-02
   3.9320000e-02
   3.0930000e-02
