# Supplementary material for: A Novel Classification Method for Flutter Signals Based on the CNN and STFT
Source: Hindawi journal article supplement (doi:10.1155/2019/9375437), 2019-04-09
Supplement: f1 [file 9375437.f1.zip › 00_25_z18.0_30channel.txt]

  -2.1820000e-02
   3.1560000e-02
   1.2198000e-01
   1.5209000e-01
   1.5683000e-01
   1.1946000e-01
   6.6650000e-02
  -1.2610000e-02
  -7.7210000e-02
  -2.0254000e-01
  -1.8518000e-01
  -6.0570000e-02
   1.0040000e-02
   5.5990000e-02
   1.0136000e-01
   9.9200000e-02
   8.5790000e-02
   8.4310000e-02
  -3.7000000e-03
  -2.9310000e-02
   6.3100000e-03
   2.5090000e-02
   1.8640000e-02
  -2.6130000e-02
  -5.2180000e-02
  -7.2490000e-02
  -9.4480000e-02
  -5.6230000e-02
  -5.1350000e-02
   6.6600000e-03
   5.9800000e-02
   3.9020000e-02
   3.6360000e-02
   9.4570000e-02
   5.0750000e-02
   2.4950000e-02
   9.8620000e-02
   9.6370000e-02
   6.1470000e-02
   5.7850000e-02
   6.9100000e-03
  -6.9970000e-02
  -1.1398000e-01
  -1.6166000e-01
  -1.1359000e-01
  -7.4080000e-02
  -2.8760000e-02
   9.6130000e-02
   1.8850000e-01
   1.8033000e-01
   1.8236000e-01
   1.2777000e-01
   3.0960000e-02
  -4.8500000e-03
  -7.3970000e-02
  -1.3155000e-01
  -1.4208000e-01
  -1.1143000e-01
  -6.7530000e-02
  -2.7530000e-02
  -6.7400000e-03
   7.7590000e-02
   1.0208000e-01
   1.3536000e-01
   1.8101000e-01
   8.1510000e-02
   3.8600000e-02
   5.5900000e-03
  -1.4260000e-01
  -1.5343000e-01
  -2.8820000e-02
  -6.1830000e-02
  -2.0730000e-02
   9.5520000e-02
   3.2790000e-02
   7.3950000e-02
   5.7580000e-02
  -4.9410000e-02
  -7.7600000e-03
  -3.4850000e-02
  -6.7200000e-02
  -4.0300000e-02
  -1.3980000e-02
   5.1800000e-03
   2.7400000e-03
  -2.8490000e-02
   1.6750000e-02
   7.6500000e-02
   6.0900000e-02
   5.2310000e-02
   1.2420000e-01
   3.5780000e-02
  -5.6430000e-02
  -5.7770000e-02
  -1.1576000e-01
  -1.1283000e-01
  -1.1283000e-01
  -4.5760000e-02
   7.7290000e-02
   1.0929000e-01
   1.1847000e-01
   1.3048000e-01
   9.3820000e-02
   6.1550000e-02
   6.8850000e-02
   2.3310000e-02
  -8.6900000e-03
  -2.4160000e-02
  -3.5400000e-03
  -9.0340000e-02
  -7.5870000e-02
  -7.1530000e-02
  -9.4260000e-02
  -4.9400000e-03
   6.9860000e-02
   1.3122000e-01
   1.1935000e-01
   1.0509000e-01
   5.9280000e-02
   3.2000000e-02
   2.9900000e-03
  -5.6210000e-02
  -5.2040000e-02
   1.0580000e-02
  -3.1780000e-02
  -7.6580000e-02
  -3.9400000e-02
  -3.5700000e-02
  -6.4270000e-02
  -2.8410000e-02
   4.6830000e-02
   8.7600000e-02
   1.4458000e-01
   1.1861000e-01
   1.0112000e-01
   1.0460000e-01
   2.5830000e-02
  -1.1008000e-01
  -1.1834000e-01
  -6.6930000e-02
  -1.2190000e-01
  -1.0945000e-01
  -1.6450000e-02
   1.5080000e-02
   2.9750000e-02
   4.1980000e-02
   9.4460000e-02
   1.3484000e-01
   8.5630000e-02
   4.6360000e-02
  -1.5080000e-02
  -4.7350000e-02
  -6.7200000e-02
  -8.7960000e-02
  -4.1150000e-02
  -2.3610000e-02
  -1.2370000e-02
   9.5910000e-02
   1.1861000e-01
   1.0158000e-01
   5.6100000e-02
   2.2670000e-02
   1.0420000e-02
  -8.6400000e-03
  -5.9060000e-02
  -4.9300000e-02
   1.4970000e-02
   2.5530000e-02
   4.9000000e-04
   5.0610000e-02
   4.5210000e-02
  -1.0200000e-02
  -4.2830000e-02
  -4.2850000e-02
   4.4000000e-04
  -5.8240000e-02
  -2.1930000e-02
  -1.6200000e-03
   7.0500000e-03
   2.1280000e-02
   5.7170000e-02
   6.2160000e-02
   6.8960000e-02
   4.6610000e-02
  -1.2300000e-03
  -1.0120000e-02
  -3.4790000e-02
  -1.3517000e-01
  -1.7901000e-01
  -1.1721000e-01
  -7.7480000e-02
  -1.0400000e-03
   9.1360000e-02
   1.7923000e-01
   2.0243000e-01
   1.9267000e-01
   1.3136000e-01
   4.7570000e-02
  -4.8670000e-02
  -9.4210000e-02
  -1.2193000e-01
  -1.1376000e-01
  -6.7720000e-02
  -6.0000000e-03
   5.4230000e-02
   5.7690000e-02
   3.9540000e-02
   9.0210000e-02
   3.9370000e-02
  -1.2640000e-02
   4.2660000e-02
   4.5020000e-02
   3.8630000e-02
   4.4170000e-02
   5.0890000e-02
   3.6740000e-02
   1.2580000e-02
  -2.2840000e-02
   9.3000000e-04
   7.7600000e-03
  -5.5690000e-02
  -2.7340000e-02
  -2.0300000e-03
  -1.1140000e-01
  -1.1332000e-01
  -8.2670000e-02
  -4.6390000e-02
   7.4520000e-02
   1.2122000e-01
   1.6928000e-01
   2.0805000e-01
   1.4082000e-01
  -1.0580000e-02
  -6.4980000e-02
  -1.0339000e-01
  -1.7811000e-01
  -1.7142000e-01
  -1.3525000e-01
  -4.7760000e-02
   4.1350000e-02
   4.6720000e-02
   6.5260000e-02
   8.6370000e-02
   7.4580000e-02
   5.1880000e-02
   4.4010000e-02
  -9.5100000e-03
  -1.4780000e-02
   7.6500000e-03
  -6.1610000e-02
  -6.6000000e-02
  -4.1240000e-02
  -5.9770000e-02
   3.2220000e-02
   7.6500000e-02
   7.1420000e-02
   1.3641000e-01
   1.5346000e-01
   1.7270000e-02
  -1.7520000e-02
  -2.7880000e-02
  -1.4175000e-01
  -1.1963000e-01
  -6.4730000e-02
  -2.3720000e-02
   4.9020000e-02
   9.0480000e-02
   8.2040000e-02
   1.6678000e-01
   1.5765000e-01
   5.6700000e-02
   1.4390000e-02
  -8.6100000e-03
  -3.4220000e-02
  -7.7240000e-02
  -8.4720000e-02
  -4.3980000e-02
  -1.8560000e-02
  -3.2930000e-02
   4.6860000e-02
   6.2600000e-02
   3.1530000e-02
   1.1250000e-01
   5.0830000e-02
  -6.0980000e-02
   1.6920000e-02
   5.8130000e-02
   3.9200000e-03
  -2.8790000e-02
  -3.3010000e-02
  -6.0680000e-02
  -2.6600000e-02
  -1.5030000e-02
  -3.5950000e-02
   6.0070000e-02
   7.7130000e-02
   6.0430000e-02
   3.7370000e-02
   3.4490000e-02
   1.3740000e-02
  -6.2430000e-02
  -7.7180000e-02
  -4.9680000e-02
   1.7740000e-02
   6.1100000e-03
  -7.4660000e-02
   5.4290000e-02
   5.7110000e-02
   5.5100000e-03
   9.9300000e-03
   4.0910000e-02
   5.8350000e-02
  -2.0040000e-02
   1.7660000e-02
   1.2341000e-01
   2.4840000e-02
  -5.3770000e-02
  -5.9990000e-02
  -7.1290000e-02
  -8.0830000e-02
  -6.9890000e-02
  -7.5150000e-02
   3.0080000e-02
   1.3575000e-01
   5.7330000e-02
   9.3470000e-02
   1.2859000e-01
   8.5300000e-03
  -6.5610000e-02
   1.2970000e-02
  -5.6970000e-02
  -1.0764000e-01
  -5.3660000e-02
   4.7400000e-03
   5.3520000e-02
   6.4130000e-02
  -8.8800000e-03
  -1.6010000e-02
   3.3590000e-02
   2.3300000e-03
  -3.9590000e-02
   1.0578000e-01
   1.0433000e-01
   5.7190000e-02
   3.6300000e-02
  -4.8800000e-02
  -8.0900000e-03
  -4.7320000e-02
  -1.2031000e-01
  -6.8740000e-02
   6.8660000e-02
   1.7710000e-02
  -3.2960000e-02
   6.1280000e-02
   1.1612000e-01
   5.9960000e-02
   3.2710000e-02
   2.5280000e-02
   8.1980000e-02
   2.1190000e-02
  -3.9240000e-02
   3.4710000e-02
   2.0920000e-02
  -1.8290000e-02
  -6.3470000e-02
  -4.5730000e-02
  -1.1000000e-04
   2.0890000e-02
   4.1890000e-02
   5.8590000e-02
   8.6750000e-02
   3.8300000e-02
   1.7930000e-02
  -2.7010000e-02
  -1.8180000e-02
   3.1060000e-02
  -4.4970000e-02
  -4.5620000e-02
   3.2190000e-02
   6.9890000e-02
   5.8590000e-02
   2.9690000e-02
  -1.1200000e-03
   4.2940000e-02
  -1.2900000e-03
  -8.2670000e-02
  -8.0140000e-02
  -3.9950000e-02
  -3.1230000e-02
  -8.9630000e-02
  -7.4900000e-03
   4.2990000e-02
   7.0700000e-03
   1.0610000e-02
  -4.5200000e-03
   5.0830000e-02
   5.2120000e-02
   2.5390000e-02
   5.7190000e-02
   8.0300000e-03
  -7.2360000e-02
  -8.2420000e-02
  -1.0323000e-01
  -6.0950000e-02
  -2.5440000e-02
   3.1860000e-02
   6.3580000e-02
   1.0822000e-01
   9.3740000e-02
   1.8780000e-02
   5.2560000e-02
   1.6290000e-02
  -6.9900000e-03
   6.4380000e-02
   2.3580000e-02
  -2.7010000e-02
  -3.8140000e-02
  -9.0230000e-02
  -1.1285000e-01
  -8.7220000e-02
   1.0400000e-03
   6.6110000e-02
   1.1965000e-01
   1.8137000e-01
   1.6149000e-01
   9.7140000e-02
   1.3600000e-02
  -5.2070000e-02
  -3.1120000e-02
   5.2100000e-03
  -4.0960000e-02
  -4.2200000e-03
   3.3810000e-02
  -3.2900000e-02
  -1.0580000e-02
   1.5710000e-02
  -3.9650000e-02
   2.8100000e-02
   1.1370000e-01
   7.5430000e-02
   7.6200000e-02
   1.2138000e-01
   6.5720000e-02
  -1.3000000e-02
  -4.6990000e-02
  -1.1527000e-01
  -1.3440000e-01
  -1.0438000e-01
  -1.2122000e-01
  -7.0190000e-02
   2.9910000e-02
   3.5510000e-02
   4.9350000e-02
   1.2459000e-01
   1.2157000e-01
   6.3690000e-02
   1.2212000e-01
   7.6720000e-02
  -3.7650000e-02
  -6.7810000e-02
  -6.7390000e-02
  -1.6561000e-01
  -1.8905000e-01
  -1.3147000e-01
  -7.7620000e-02
   4.5980000e-02
   1.0808000e-01
   1.4707000e-01
   1.8792000e-01
   1.3997000e-01
   5.7770000e-02
   2.2210000e-02
  -3.7540000e-02
  -5.1790000e-02
  -2.8410000e-02
  -1.6890000e-02
  -2.1080000e-02
  -1.0970000e-02
   2.8000000e-03
  -4.7570000e-02
  -8.2800000e-03
   9.8400000e-03
  -4.7400000e-03
   9.6800000e-03
  -3.0410000e-02
   3.9320000e-02
   8.9680000e-02
   5.2600000e-03
   7.9020000e-02
   9.8270000e-02
   1.8920000e-02
   6.9500000e-02
   4.6340000e-02
   1.1000000e-03
  -7.1890000e-02
  -9.6430000e-02
  -8.3790000e-02
  -9.7580000e-02
  -1.5971000e-01
  -3.2630000e-02
   1.5861000e-01
   1.0556000e-01
   1.1740000e-01
   1.6626000e-01
   1.3893000e-01
   6.5910000e-02
  -1.2690000e-02
  -3.8600000e-02
  -6.5970000e-02
  -1.0306000e-01
  -8.8120000e-02
  -6.6790000e-02
  -1.8210000e-02
   3.3860000e-02
   2.1360000e-02
   8.4200000e-03
   9.8160000e-02
   1.1823000e-01
   1.2890000e-02
   6.6080000e-02
   5.4670000e-02
  -2.1990000e-02
  -8.0600000e-03
  -3.1200000e-02
  -7.4300000e-02
  -4.3270000e-02
  -4.0830000e-02
  -2.9600000e-03
   9.6700000e-02
   3.3920000e-02
   1.1650000e-02
  -3.3370000e-02
  -8.8940000e-02
  -1.5960000e-02
  -4.7570000e-02
  -5.7030000e-02
   8.8230000e-02
   7.3560000e-02
  -6.6600000e-03
   5.9200000e-02
   9.0890000e-02
   1.8400000e-03
  -3.4570000e-02
  -1.1430000e-02
   1.8840000e-02
   5.0000000e-05
  -4.8200000e-02
  -6.0050000e-02
  -3.3150000e-02
  -5.3630000e-02
  -7.5180000e-02
  -7.9800000e-03
   3.2110000e-02
   1.0986000e-01
   7.6580000e-02
   6.7560000e-02
   1.1653000e-01
   6.3420000e-02
  -8.8000000e-03
  -1.2480000e-02
  -4.6300000e-03
   1.6590000e-02
  -2.9120000e-02
  -2.3960000e-02
   2.1700000e-03
  -1.6780000e-02
  -1.1831000e-01
  -9.2020000e-02
   2.3330000e-02
  -5.4430000e-02
   9.7900000e-03
   1.2352000e-01
   1.6456000e-01
   8.0770000e-02
   1.0197000e-01
   8.5870000e-02
   6.5260000e-02
   1.8560000e-02
  -3.2220000e-02
  -4.1840000e-02
  -4.0300000e-02
  -6.7340000e-02
  -1.2146000e-01
  -1.0457000e-01
   1.0010000e-02
   2.9390000e-02
   5.8840000e-02
   1.1365000e-01
   1.3111000e-01
   1.4496000e-01
   4.0550000e-02
  -2.6490000e-02
  -6.1940000e-02
  -7.2580000e-02
  -1.1428000e-01
  -8.0530000e-02
  -2.9670000e-02
   4.5980000e-02
   5.3930000e-02
   3.8500000e-02
   7.4280000e-02
   4.1210000e-02
  -4.8940000e-02
  -6.6380000e-02
  -1.4120000e-02
  -5.3990000e-02
  -2.0070000e-02
   6.0870000e-02
   3.3720000e-02
   8.0530000e-02
   6.0980000e-02
  -2.9120000e-02
   5.9200000e-02
   2.0290000e-02
  -7.4910000e-02
  -2.1470000e-02
   2.5120000e-02
   6.1880000e-02
  -2.4020000e-02
  -1.5160000e-02
   1.0360000e-02
  -7.4850000e-02
  -8.5160000e-02
   6.3900000e-03
   1.1357000e-01
   5.0860000e-02
   5.9470000e-02
   7.4030000e-02
  -1.5400000e-03
   1.2390000e-02
  -8.4690000e-02
  -1.4693000e-01
  -1.2300000e-03
   4.0280000e-02
  -1.3000000e-02
   3.8190000e-02
   1.2267000e-01
   8.5570000e-02
   2.5640000e-02
   2.3390000e-02
  -5.2400000e-03
  -1.1870000e-02
  -4.6360000e-02
  -7.8330000e-02
  -7.1310000e-02
  -7.8470000e-02
  -6.8000000e-02
  -8.5000000e-04
   8.7240000e-02
   1.4965000e-01
   1.1165000e-01
   6.7810000e-02
   1.5502000e-01
   1.0065000e-01
  -6.9420000e-02
  -6.3230000e-02
  -9.2100000e-03
  -8.5460000e-02
  -9.7310000e-02
  -4.4310000e-02
  -5.0400000e-03
   1.1000000e-03
  -1.6920000e-02
   5.2860000e-02
   8.5600000e-02
   2.5990000e-02
   6.6540000e-02
   1.1296000e-01
   3.5310000e-02
   4.2580000e-02
   6.5890000e-02
   2.5610000e-02
   3.7750000e-02
   4.6560000e-02
  -4.5760000e-02
  -7.2360000e-02
  -4.4310000e-02
  -1.0685000e-01
  -1.2695000e-01
  -8.1680000e-02
  -3.9650000e-02
   3.8900000e-03
   5.6670000e-02
   1.1060000e-01
   1.8299000e-01
   1.5371000e-01
   9.4890000e-02
   1.8480000e-02
  -6.3060000e-02
  -7.1340000e-02
  -1.3605000e-01
  -1.5242000e-01
  -4.8750000e-02
  -3.5560000e-02
  -6.2380000e-02
   7.7240000e-02
   5.6950000e-02
  -5.9720000e-02
   5.3850000e-02
   9.1030000e-02
   3.7230000e-02
   2.4350000e-02
   4.7400000e-03
   5.6810000e-02
   4.8530000e-02
  -5.1660000e-02
  -6.3900000e-03
  -6.6350000e-02
  -5.0200000e-02
   2.8930000e-02
   2.5800000e-03
   1.8810000e-02
   9.7910000e-02
  -1.1080000e-02
  -8.4970000e-02
   2.7560000e-02
  -4.6560000e-02
  -5.4260000e-02
   6.8790000e-02
   5.5170000e-02
   4.4750000e-02
   1.4011000e-01
   6.1440000e-02
   4.6830000e-02
   6.2950000e-02
  -8.3630000e-02
  -5.7850000e-02
  -1.6780000e-02
  -5.3790000e-02
  -3.4900000e-02
  -1.5550000e-02
   7.5700000e-02
   9.3220000e-02
   1.7600000e-02
   5.9110000e-02
   1.7164000e-01
   4.1210000e-02
  -6.2650000e-02
   2.1100000e-03
  -4.3130000e-02
  -4.6170000e-02
  -5.5520000e-02
  -5.8570000e-02
   9.5090000e-02
   5.6670000e-02
   8.2800000e-03
   6.8050000e-02
   5.6650000e-02
  -2.3580000e-02
  -7.2190000e-02
  -6.5280000e-02
  -6.7200000e-03
   4.7200000e-03
  -1.6530000e-02
   6.9230000e-02
   7.7460000e-02
  -1.4300000e-03
   3.9800000e-03
  -4.2030000e-02
  -6.5150000e-02
   5.7300000e-03
   7.6200000e-03
   5.8890000e-02
   8.7030000e-02
   5.0340000e-02
   1.5460000e-02
  -1.5850000e-02
  -8.0610000e-02
  -9.7530000e-02
  -7.2740000e-02
  -2.9170000e-02
   2.7280000e-02
   2.4700000e-02
   3.2790000e-02
   8.5900000e-02
   3.4990000e-02
   3.1800000e-03
   5.5820000e-02
   2.8760000e-02
   6.1750000e-02
   3.8280000e-02
  -4.5020000e-02
  -3.0020000e-02
  -5.5600000e-02
  -1.2837000e-01
  -1.3152000e-01
  -1.1200000e-01
  -3.0320000e-02
   5.7900000e-03
   5.3660000e-02
   1.0965000e-01
   1.5044000e-01
   1.9278000e-01
   1.7394000e-01
   1.3503000e-01
   2.2130000e-02
  -2.9910000e-02
  -9.2260000e-02
  -1.7734000e-01
  -1.5604000e-01
  -9.0120000e-02
  -4.2830000e-02
   6.2350000e-02
   1.0221000e-01
   8.1680000e-02
   9.7310000e-02
   1.0523000e-01
   5.0830000e-02
   6.1100000e-03
   2.2000000e-04
  -5.6620000e-02
  -3.6990000e-02
  -2.0290000e-02
   6.8000000e-03
  -1.3200000e-03
   1.2830000e-02
   6.7560000e-02
   9.0290000e-02
   4.6470000e-02
   3.5370000e-02
   6.4930000e-02
  -1.5660000e-02
  -9.6070000e-02
  -4.0110000e-02
   1.2060000e-02
  -2.5090000e-02
  -9.7100000e-03
   2.3470000e-02
   6.5910000e-02
   7.7810000e-02
   2.5720000e-02
   3.0740000e-02
   5.2590000e-02
  -9.9000000e-04
  -2.8020000e-02
  -2.6730000e-02
  -4.9710000e-02
  -6.9780000e-02
  -4.6100000e-03
  -2.4400000e-03
   1.7220000e-02
   4.0500000e-02
   3.1800000e-03
   6.1420000e-02
   4.3680000e-02
  -4.9820000e-02
  -3.9730000e-02
  -2.1170000e-02
  -3.5230000e-02
   2.5200000e-03
  -2.6570000e-02
   1.6420000e-02
   5.4040000e-02
  -9.0200000e-03
  -7.4000000e-04
   7.8700000e-03
  -1.6450000e-02
   9.5700000e-03
   3.3290000e-02
  -6.8410000e-02
  -6.6680000e-02
   3.7620000e-02
  -2.6290000e-02
  -5.3900000e-02
  -1.9170000e-02
   5.3600000e-02
   6.9700000e-02
  -9.9800000e-03
   6.6980000e-02
   9.9420000e-02
  -1.6420000e-02
  -6.0180000e-02
  -2.4100000e-03
   7.9840000e-02
   4.4750000e-02
   8.2010000e-02
   1.1425000e-01
   6.5670000e-02
   7.8400000e-03
  -1.3506000e-01
  -1.6848000e-01
  -1.4035000e-01
  -1.5598000e-01
  -1.1151000e-01
   1.0496000e-01
   1.8455000e-01
   1.3301000e-01
   1.9483000e-01
   2.9458000e-01
   1.6267000e-01
   3.7370000e-02
   3.5700000e-02
  -2.5580000e-02
  -9.1880000e-02
  -1.7057000e-01
  -1.5105000e-01
  -1.0142000e-01
  -1.4449000e-01
  -6.7910000e-02
   1.3080000e-02
   4.4660000e-02
   1.4408000e-01
   1.7704000e-01
   1.8677000e-01
   2.0780000e-01
   1.1200000e-01
  -1.7330000e-02
  -4.4170000e-02
  -1.3224000e-01
  -1.6733000e-01
  -1.2185000e-01
  -1.2437000e-01
  -8.4420000e-02
   5.5000000e-04
  -6.5300000e-03
   1.5350000e-02
   6.3880000e-02
   5.8980000e-02
   7.6720000e-02
   8.9770000e-02
   9.8130000e-02
   9.5330000e-02
   4.0960000e-02
  -8.5000000e-04
  -1.2340000e-02
  -8.4580000e-02
  -1.5042000e-01
  -1.3706000e-01
  -7.5540000e-02
  -2.8270000e-02
   1.0690000e-02
   3.3830000e-02
   1.0189000e-01
   1.0800000e-01
   4.9870000e-02
   5.4510000e-02
   1.5900000e-03
  -1.5080000e-02
   9.7100000e-03
  -5.2670000e-02
  -2.3060000e-02
  -4.1290000e-02
  -9.4180000e-02
  -3.1560000e-02
   4.1260000e-02
   5.6480000e-02
   6.9450000e-02
   9.4670000e-02
   8.4480000e-02
   3.8960000e-02
  -5.3470000e-02
  -2.8600000e-02
   2.6600000e-03
   2.2480000e-02
   9.5400000e-03
   2.2400000e-02
   1.8400000e-02
  -4.1320000e-02
  -1.6500000e-03
  -2.7310000e-02
  -2.7860000e-02
   2.4650000e-02
   7.1120000e-02
   7.2930000e-02
   4.5840000e-02
   6.4350000e-02
   8.4500000e-02
   3.7340000e-02
  -4.0600000e-03
  -6.4460000e-02
  -1.4920000e-02
  -1.1066000e-01
  -1.8184000e-01
  -7.5070000e-02
   3.6080000e-02
   6.8490000e-02
   3.7950000e-02
   1.1894000e-01
   1.4334000e-01
   7.1920000e-02
   1.8210000e-02
  -3.3700000e-03
   2.6020000e-02
  -1.8640000e-02
  -6.5830000e-02
  -6.2950000e-02
   1.5900000e-02
   2.1850000e-02
  -9.4100000e-02
  -4.8780000e-02
   1.6700000e-02
   3.4660000e-02
   1.9710000e-02
   6.4710000e-02
   1.3712000e-01
   1.3004000e-01
   4.2420000e-02
  -4.0410000e-02
  -2.7690000e-02
  -7.5020000e-02
  -1.0128000e-01
  -2.7230000e-02
  -1.5190000e-02
   9.8700000e-03
   3.1830000e-02
  -1.9770000e-02
   1.4720000e-02
  -2.8190000e-02
  -9.1930000e-02
  -5.2530000e-02
   2.2670000e-02
   1.2450000e-02
   4.4610000e-02
   8.4580000e-02
   8.6830000e-02
   6.6930000e-02
   4.3380000e-02
   1.6480000e-02
  -4.6140000e-02
  -9.0890000e-02
  -8.4500000e-02
  -6.9890000e-02
  -3.9540000e-02
   4.2310000e-02
   3.2660000e-02
   7.3180000e-02
   9.5800000e-02
   1.1019000e-01
   6.4950000e-02
   2.7610000e-02
   2.9310000e-02
  -1.5300000e-02
  -4.1570000e-02
  -4.8230000e-02
  -4.7380000e-02
  -5.2560000e-02
  -6.4980000e-02
  -4.1150000e-02
   4.2690000e-02
   4.9410000e-02
   8.2200000e-02
   1.1814000e-01
   7.3010000e-02
   6.2810000e-02
  -1.4180000e-02
  -7.4690000e-02
  -9.2780000e-02
  -5.9800000e-02
  -4.5490000e-02
   1.7680000e-02
   8.0800000e-02
   6.3800000e-02
   8.9630000e-02
   1.2230000e-02
  -1.1430000e-02
   4.7130000e-02
  -5.1460000e-02
   2.2180000e-02
   1.4233000e-01
   1.0640000e-02
  -2.0300000e-03
  -6.9000000e-04
  -8.8730000e-02
  -8.4280000e-02
  -8.5380000e-02
  -6.3750000e-02
   3.7450000e-02
   7.5840000e-02
   4.5760000e-02
   1.0553000e-01
   8.3900000e-02
  -2.6000000e-03
   6.3300000e-03
  -7.0330000e-02
  -3.6770000e-02
   4.4280000e-02
  -9.4950000e-02
  -5.5600000e-02
   3.7260000e-02
  -3.4660000e-02
  -7.5700000e-03
   4.6010000e-02
   1.5770000e-02
   6.0790000e-02
   4.7130000e-02
   5.6500000e-03
   8.7330000e-02
   1.7330000e-02
  -7.9730000e-02
  -5.1350000e-02
  -3.1300000e-03
  -3.2600000e-03
   2.7010000e-02
   3.3530000e-02
   2.2800000e-03
   5.3630000e-02
  -3.2820000e-02
  -5.6670000e-02
  -3.0870000e-02
  -7.0740000e-02
   3.7010000e-02
   4.3460000e-02
   2.7170000e-02
   1.3136000e-01
   1.1321000e-01
   5.5740000e-02
   4.9350000e-02
   3.5600000e-03
  -7.9400000e-02
  -1.1113000e-01
  -1.0619000e-01
  -4.9680000e-02
   4.3620000e-02
  -5.4300000e-03
  -3.1890000e-02
   6.3010000e-02
   5.6180000e-02
   5.6450000e-02
   1.9660000e-02
   7.2990000e-02
   1.5823000e-01
   5.5600000e-02
   5.4530000e-02
   4.7730000e-02
  -4.2000000e-02
  -1.1433000e-01
  -1.0265000e-01
  -6.4650000e-02
  -6.3170000e-02
  -4.2500000e-03
   8.7500000e-03
   4.7240000e-02
   1.0285000e-01
   3.0130000e-02
   4.0280000e-02
   6.0680000e-02
   4.5760000e-02
   5.3250000e-02
   5.1900000e-02
  -1.2530000e-02
  -3.9620000e-02
  -2.4620000e-02
  -1.3624000e-01
  -1.0117000e-01
  -2.1740000e-02
  -6.4380000e-02
  -1.5460000e-02
   6.6650000e-02
   1.0490000e-01
   9.1910000e-02
   8.4890000e-02
   8.4200000e-03
  -4.1100000e-03
  -1.1650000e-02
  -7.4080000e-02
  -4.3620000e-02
  -1.0470000e-02
  -9.3000000e-04
   2.1880000e-02
  -1.9380000e-02
   1.3220000e-02
   5.3490000e-02
  -2.0290000e-02
  -2.8320000e-02
   4.5270000e-02
   6.5300000e-03
  -7.2770000e-02
   2.6000000e-03
  -4.0090000e-02
  -2.6020000e-02
  -8.8300000e-03
  -2.0840000e-02
   8.2140000e-02
   7.4000000e-02
   5.4150000e-02
   6.6380000e-02
   6.2020000e-02
   3.8910000e-02
   2.3830000e-02
  -9.2900000e-03
  -3.2410000e-02
  -4.3100000e-02
  -5.6700000e-02
  -2.5640000e-02
  -6.1060000e-02
  -2.7910000e-02
   5.6480000e-02
   6.9590000e-02
   5.2400000e-02
   5.5060000e-02
   7.4800000e-02
   6.2900000e-02
   3.8710000e-02
  -1.7330000e-02
  -4.5490000e-02
   7.9500000e-03
  -1.1380000e-02
  -3.8820000e-02
  -5.1220000e-02
  -2.9090000e-02
   5.4800000e-03
  -6.1330000e-02
  -3.6700000e-03
   7.8910000e-02
   5.4920000e-02
   2.7230000e-02
   7.0960000e-02
   6.8050000e-02
  -2.2920000e-02
  -1.1630000e-02
  -1.9030000e-02
  -5.5000000e-04
   5.1110000e-02
  -4.9570000e-02
   1.0200000e-02
   3.5670000e-02
  -7.5980000e-02
  -7.2330000e-02
  -6.0600000e-03
  -8.6400000e-03
  -5.0890000e-02
   7.6440000e-02
   1.0855000e-01
   6.4680000e-02
   7.2270000e-02
   4.6120000e-02
  -3.4440000e-02
  -6.1060000e-02
  -1.0046000e-01
  -1.2388000e-01
   3.4140000e-02
   1.2508000e-01
   4.5600000e-02
   5.1130000e-02
   9.3800000e-02
  -1.2150000e-02
  -8.1600000e-02
  -5.6430000e-02
  -4.3210000e-02
  -1.3700000e-03
   6.6980000e-02
   1.9910000e-02
   3.3920000e-02
   6.4190000e-02
  -2.2180000e-02
  -7.3730000e-02
  -5.9500000e-02
  -2.4950000e-02
  -5.8100000e-03
   5.5080000e-02
   1.1494000e-01
   1.4208000e-01
   2.7560000e-02
  -4.6100000e-03
   5.3500000e-03
  -1.0378000e-01
  -5.5380000e-02
  -1.8150000e-02
  -1.0890000e-02
   2.8320000e-02
   5.2100000e-03
  -4.4440000e-02
  -3.7150000e-02
  -5.3250000e-02
  -8.6280000e-02
   3.5290000e-02
   1.4364000e-01
   1.3983000e-01
   1.7838000e-01
   1.1883000e-01
   3.8850000e-02
  -1.5400000e-03
  -1.4592000e-01
  -1.4595000e-01
  -9.2370000e-02
  -2.9860000e-02
   1.5330000e-02
   6.8570000e-02
   1.3007000e-01
   7.9350000e-02
   1.4260000e-02
  -5.8700000e-03
  -1.1570000e-02
  -3.0680000e-02
  -1.1100000e-02
   8.2450000e-02
   5.9800000e-03
   1.2300000e-03
   7.0630000e-02
  -2.5610000e-02
  -2.4870000e-02
   3.9730000e-02
   8.0900000e-03
   1.7000000e-02
   9.5170000e-02
   4.1290000e-02
  -2.1880000e-02
  -5.4510000e-02
  -1.2190000e-01
  -1.4208000e-01
  -6.9590000e-02
  -4.4530000e-02
   3.6710000e-02
   1.2645000e-01
   1.6761000e-01
   1.3693000e-01
   1.0997000e-01
   2.9900000e-03
  -1.0087000e-01
  -1.3649000e-01
  -1.2201000e-01
  -8.7460000e-02
  -3.5150000e-02
   7.3780000e-02
   1.0093000e-01
   7.6170000e-02
   2.0810000e-02
  -3.3920000e-02
  -7.4190000e-02
  -4.4830000e-02
   1.6000000e-04
   4.4530000e-02
   5.5660000e-02
   4.9160000e-02
   2.1470000e-02
   3.3000000e-04
  -1.6860000e-02
  -7.5760000e-02
  -2.8710000e-02
   7.2140000e-02
   2.8020000e-02
   6.5500000e-02
   6.3750000e-02
  -1.6120000e-02
  -6.1880000e-02
  -7.6170000e-02
   5.1000000e-03
   5.7110000e-02
   5.2750000e-02
   1.1113000e-01
   1.7879000e-01
   6.7480000e-02
  -4.9190000e-02
  -1.1886000e-01
  -1.2138000e-01
  -9.5610000e-02
  -6.2900000e-02
   5.2090000e-02
   2.2576000e-01
   1.3196000e-01
   1.7550000e-02
   3.4250000e-02
  -4.0580000e-02
  -1.2207000e-01
  -1.0855000e-01
  -1.0250000e-02
   8.0550000e-02
   5.8510000e-02
   1.2640000e-02
   1.5900000e-02
  -1.3850000e-02
  -6.4510000e-02
  -5.5000000e-02
   4.0990000e-02
   9.3550000e-02
   1.5275000e-01
   6.0430000e-02
   1.2300000e-03
  -1.4640000e-02
  -1.3915000e-01
  -1.5143000e-01
  -6.9920000e-02
  -1.2560000e-02
   5.0010000e-02
   1.4249000e-01
   1.9582000e-01
   1.1052000e-01
   1.6590000e-02
  -6.4980000e-02
  -1.2004000e-01
  -7.6720000e-02
  -9.8020000e-02
  -5.9720000e-02
   6.3720000e-02
   9.5910000e-02
   6.5120000e-02
  -5.9830000e-02
  -2.5800000e-03
   3.1370000e-02
  -1.5240000e-02
   8.0600000e-03
   5.6970000e-02
   7.7100000e-02
   2.3520000e-02
  -5.5100000e-03
  -3.7120000e-02
  -5.8590000e-02
  -5.6650000e-02
  -1.9770000e-02
   1.0450000e-02
   4.0410000e-02
   7.5210000e-02
   5.5490000e-02
   1.4000000e-04
   7.1620000e-02
  -1.0580000e-02
  -2.9610000e-02
   1.1600000e-02
  -1.1240000e-02
   4.4970000e-02
   3.1310000e-02
  -2.3740000e-02
  -4.0660000e-02
  -1.5980000e-02
  -4.7840000e-02
  -4.5820000e-02
  -3.4850000e-02
   1.4000000e-03
   5.0070000e-02
   1.4830000e-02
   2.2500000e-03
   1.0071000e-01
   6.0510000e-02
   4.5760000e-02
   9.9500000e-02
   1.4720000e-02
  -1.3460000e-02
  -9.7900000e-03
  -4.4690000e-02
  -5.7030000e-02
  -6.9260000e-02
  -9.5090000e-02
   3.4160000e-02
   8.0800000e-02
   4.2000000e-02
   1.5234000e-01
   1.3158000e-01
   1.9690000e-02
   9.5100000e-03
   9.3500000e-03
  -4.7570000e-02
  -8.2610000e-02
  -6.1960000e-02
  -4.8420000e-02
  -2.1300000e-02
  -3.3810000e-02
   6.5060000e-02
   7.3750000e-02
   2.0260000e-02
   1.0726000e-01
   1.0696000e-01
   4.0280000e-02
   2.4510000e-02
  -4.6280000e-02
  -1.0391000e-01
  -4.4390000e-02
  -1.0929000e-01
  -1.1729000e-01
   4.7320000e-02
   4.8170000e-02
   5.8510000e-02
   1.1699000e-01
   8.0230000e-02
   4.4090000e-02
   5.8900000e-03
  -3.7230000e-02
  -5.6340000e-02
  -3.5530000e-02
  -5.0150000e-02
  -8.6900000e-03
   9.8400000e-03
  -8.3100000e-03
   4.4100000e-03
  -2.1080000e-02
  -1.8320000e-02
   4.4100000e-03
  -3.9350000e-02
   3.1420000e-02
   2.9720000e-02
   2.6130000e-02
   6.6980000e-02
   3.7860000e-02
   2.3580000e-02
   6.9200000e-02
   6.5470000e-02
   4.1040000e-02
  -3.5400000e-03
  -7.7460000e-02
  -7.9760000e-02
  -1.0391000e-01
  -1.5746000e-01
  -1.1428000e-01
   5.3630000e-02
   5.6700000e-02
   1.0668000e-01
   2.0544000e-01
   1.7811000e-01
   1.5088000e-01
   7.9570000e-02
   7.5400000e-03
   3.0000000e-04
  -2.4480000e-02
  -8.0310000e-02
  -9.6620000e-02
  -6.7970000e-02
  -9.1440000e-02
  -7.1670000e-02
   4.2200000e-03
   1.5000000e-02
   6.9890000e-02
   8.4940000e-02
   8.2610000e-02
   1.0084000e-01
   4.9410000e-02
   8.9900000e-03
   3.5180000e-02
   6.9000000e-04
  -5.0970000e-02
  -3.6770000e-02
  -8.2300000e-03
  -2.8380000e-02
  -4.8940000e-02
   5.6800000e-03
   2.3960000e-02
   1.8290000e-02
   2.9970000e-02
   1.1240000e-02
   1.8420000e-02
   1.5460000e-02
  -4.3600000e-03
  -1.3870000e-02
   2.9470000e-02
  -7.7600000e-03
  -8.4780000e-02
  -1.3410000e-02
   5.2600000e-03
  -8.9330000e-02
  -8.8300000e-03
   4.0250000e-02
   4.4880000e-02
   1.0030000e-01
   8.3710000e-02
   6.5060000e-02
   8.2910000e-02
   5.0480000e-02
  -4.2850000e-02
  -2.9500000e-02
  -4.7410000e-02
  -1.0062000e-01
  -1.0869000e-01
  -1.1326000e-01
   8.5000000e-03
   3.8930000e-02
   3.2240000e-02
   1.3928000e-01
   1.4754000e-01
   1.1661000e-01
   7.5130000e-02
   2.0070000e-02
   3.2600000e-03
  -1.9930000e-02
  -6.1440000e-02
  -5.8370000e-02
  -4.0060000e-02
  -9.0640000e-02
  -8.9220000e-02
  -3.2710000e-02
   3.6770000e-02
   6.8660000e-02
   6.8410000e-02
   1.1850000e-01
   1.2708000e-01
   5.8920000e-02
   3.8740000e-02
   1.8810000e-02
  -9.3550000e-02
  -1.0032000e-01
  -6.5800000e-02
  -7.8440000e-02
  -3.3480000e-02
   1.0800000e-02
  -3.1170000e-02
   3.3120000e-02
   6.4980000e-02
   3.5150000e-02
   7.0330000e-02
   6.0370000e-02
   7.1860000e-02
   6.7970000e-02
   4.4200000e-02
   2.1740000e-02
   4.0300000e-03
  -5.0480000e-02
  -7.5700000e-02
  -6.9260000e-02
  -7.9900000e-02
  -6.8680000e-02
  -3.5780000e-02
   2.2890000e-02
   1.4134000e-01
   9.8790000e-02
   3.2820000e-02
   7.3950000e-02
   3.1530000e-02
  -5.2260000e-02
  -1.2560000e-02
  -3.3000000e-04
  -2.6810000e-02
  -2.5690000e-02
  -4.8500000e-03
  -4.1100000e-02
  -1.2560000e-02
   4.1890000e-02
   3.7480000e-02
   1.2313000e-01
   1.1680000e-01
   8.4940000e-02
   6.1750000e-02
  -2.7580000e-02
  -9.0890000e-02
  -1.4079000e-01
  -1.1395000e-01
  -1.0254000e-01
  -4.3900000e-03
   7.9760000e-02
   6.6740000e-02
   1.4852000e-01
   1.4222000e-01
   6.7370000e-02
   6.3660000e-02
   6.3600000e-03
  -7.5290000e-02
  -1.3517000e-01
  -1.0954000e-01
  -7.5130000e-02
  -9.8650000e-02
  -1.2150000e-02
   5.0860000e-02
   1.1716000e-01
   1.0918000e-01
   7.0270000e-02
   9.7530000e-02
   9.5100000e-03
   7.6500000e-03
  -3.3810000e-02
  -8.3680000e-02
  -3.4160000e-02
  -7.1420000e-02
  -1.0276000e-01
   1.2370000e-02
   7.9240000e-02
   9.5100000e-03
   2.3630000e-02
   8.5000000e-02
   5.4430000e-02
   3.3370000e-02
   2.4700000e-03
  -4.0880000e-02
  -2.5750000e-02
  -9.7910000e-02
  -1.2228000e-01
  -3.2050000e-02
   6.8820000e-02
   5.0420000e-02
   3.2820000e-02
   1.5897000e-01
   2.1575000e-01
   7.3590000e-02
   4.5950000e-02
   1.1916000e-01
   6.7200000e-03
  -1.0545000e-01
  -8.9770000e-02
  -8.4750000e-02
  -1.0611000e-01
  -7.9760000e-02
  -1.2837000e-01
  -1.5570000e-02
   1.6256000e-01
   3.4630000e-02
   3.9210000e-02
   1.5634000e-01
   1.4669000e-01
   2.7880000e-02
  -1.8100000e-03
   2.3220000e-02
  -1.6940000e-02
  -3.3010000e-02
  -4.1070000e-02
  -5.9800000e-02
  -8.0550000e-02
  -7.9210000e-02
  -8.1210000e-02
  -5.5520000e-02
   1.7740000e-02
   7.9510000e-02
   8.9030000e-02
   1.2777000e-01
   1.5003000e-01
   5.8620000e-02
   1.5740000e-02
   2.0430000e-02
  -1.1170000e-01
  -1.0970000e-01
  -7.8200000e-02
  -7.9320000e-02
  -2.7530000e-02
  -9.5100000e-03
   2.0920000e-02
   8.1730000e-02
   6.9750000e-02
   6.1010000e-02
   1.0561000e-01
   5.7960000e-02
  -2.6400000e-02
  -4.4770000e-02
  -8.7080000e-02
  -6.4620000e-02
   1.1730000e-02
  -1.8230000e-02
   5.2450000e-02
   1.3586000e-01
   5.2370000e-02
   7.7350000e-02
  -2.3770000e-02
  -8.4560000e-02
  -3.3340000e-02
  -8.8730000e-02
  -8.7490000e-02
   3.6380000e-02
   7.5950000e-02
   9.0920000e-02
   1.4397000e-01
   7.8740000e-02
   4.2940000e-02
   1.6370000e-02
  -8.7630000e-02
  -3.3890000e-02
  -2.0970000e-02
  -7.9160000e-02
  -2.4700000e-03
   1.1460000e-02
  -6.1800000e-02
  -6.7700000e-03
   3.7290000e-02
  -1.1600000e-02
   6.6960000e-02
   1.0265000e-01
   8.7500000e-03
   6.9900000e-03
  -5.6320000e-02
  -4.9020000e-02
  -3.1150000e-02
  -8.3840000e-02
   3.3560000e-02
   7.1450000e-02
   9.6650000e-02
   1.3410000e-01
   7.4740000e-02
  -8.1200000e-03
  -3.6990000e-02
  -7.2030000e-02
  -8.5410000e-02
   6.7530000e-02
   5.2290000e-02
  -3.3700000e-02
   8.7300000e-02
   3.9980000e-02
  -4.8260000e-02
  -3.3090000e-02
  -2.0510000e-02
  -2.3910000e-02
  -2.1910000e-02
  -2.5330000e-02
   1.0690000e-02
   7.8800000e-02
   7.8700000e-03
   6.4200000e-03
   1.2549000e-01
   9.7120000e-02
   8.9190000e-02
   4.7240000e-02
   1.9380000e-02
  -3.8100000e-03
  -1.8735000e-01
  -1.9875000e-01
  -6.4900000e-02
  -1.2678000e-01
  -6.3120000e-02
   8.6180000e-02
   9.5770000e-02
   1.6862000e-01
   1.6333000e-01
   6.4570000e-02
   6.6520000e-02
   1.6920000e-02
  -5.0310000e-02
  -6.3600000e-03
  -2.8900000e-02
  -9.4570000e-02
  -4.8580000e-02
  -6.1960000e-02
  -4.0850000e-02
   1.9250000e-02
  -6.7610000e-02
  -4.4720000e-02
   8.0910000e-02
   9.0000000e-04
   1.7520000e-02
   4.6390000e-02
   2.2130000e-02
   7.7890000e-02
   6.3500000e-02
   4.6340000e-02
   1.3243000e-01
   7.8360000e-02
  -7.1620000e-02
  -5.4510000e-02
  -5.5270000e-02
  -1.4320000e-01
  -1.3520000e-01
  -1.1886000e-01
  -1.8970000e-02
   1.3457000e-01
   3.8740000e-02
   1.1198000e-01
   1.9782000e-01
   1.2335000e-01
   7.0110000e-02
   8.0010000e-02
   6.2710000e-02
  -2.3300000e-03
  -2.6070000e-02
  -1.1697000e-01
  -1.3035000e-01
  -1.1886000e-01
  -1.8521000e-01
  -8.4120000e-02
   2.9910000e-02
   6.1470000e-02
   1.7992000e-01
   1.5990000e-01
   1.7400000e-01
   1.7051000e-01
   7.0000000e-02
  -7.2740000e-02
  -9.8100000e-02
  -9.3500000e-02
  -1.2936000e-01
  -6.4240000e-02
  -1.8780000e-02
  -5.1500000e-03
   2.7880000e-02
   2.2700000e-02
  -6.8300000e-03
   1.6200000e-02
   8.1200000e-03
   5.7030000e-02
   6.9780000e-02
   9.4840000e-02
   2.4180000e-02
   8.3600000e-03
  -4.0300000e-03
  -9.3470000e-02
  -5.7220000e-02
   2.8490000e-02
  -1.1190000e-02
   3.3180000e-02
   5.3520000e-02
  -2.5800000e-03
  -3.6960000e-02
  -5.5030000e-02
  -3.9400000e-02
  -5.8150000e-02
   3.2710000e-02
   9.9010000e-02
   1.3657000e-01
   1.1878000e-01
   8.0720000e-02
   4.5460000e-02
  -1.1099000e-01
  -1.8115000e-01
  -1.4027000e-01
  -7.1730000e-02
  -8.0900000e-03
   4.4310000e-02
   1.0567000e-01
   1.1422000e-01
   1.0556000e-01
  -3.3920000e-02
  -6.6410000e-02
   3.1300000e-03
  -9.5400000e-03
   2.0510000e-02
   4.1430000e-02
   8.3460000e-02
   3.6990000e-02
  -7.2080000e-02
  -1.3710000e-02
  -2.2800000e-03
   1.8560000e-02
  -3.0000000e-05
   1.2420000e-02
   5.5960000e-02
   3.3230000e-02
  -6.5970000e-02
  -9.2210000e-02
  -4.5800000e-03
   9.1600000e-03
  -4.5650000e-02
   7.3100000e-02
   1.9571000e-01
   1.7846000e-01
   1.1392000e-01
   2.6570000e-02
  -1.0010000e-02
  -1.8255000e-01
  -2.2965000e-01
  -1.4079000e-01
  -9.2730000e-02
  -4.7240000e-02
   6.1880000e-02
   1.8680000e-01
   1.5927000e-01
   1.7572000e-01
   2.0745000e-01
   8.5050000e-02
   7.4390000e-02
   1.5660000e-02
  -1.0460000e-01
  -1.1250000e-01
  -2.0300000e-01
  -2.1312000e-01
  -1.5828000e-01
  -9.0810000e-02
  -1.7680000e-02
   7.2820000e-02
   2.1663000e-01
   1.9949000e-01
   1.8694000e-01
   1.3405000e-01
   3.8850000e-02
  -3.6200000e-03
  -1.0449000e-01
  -1.2689000e-01
  -1.4320000e-01
  -8.5430000e-02
  -3.0190000e-02
  -5.4010000e-02
   2.1110000e-02
   4.4690000e-02
   5.4430000e-02
   2.5440000e-02
  -4.6100000e-03
  -1.0100000e-03
  -6.0540000e-02
  -4.4970000e-02
   7.4690000e-02
   7.6360000e-02
   1.2228000e-01
   1.2664000e-01
   3.7840000e-02
  -2.9610000e-02
  -4.4120000e-02
  -7.8830000e-02
  -8.9790000e-02
  -1.2800000e-02
   3.6270000e-02
   1.3600000e-02
   3.2760000e-02
   5.2450000e-02
  -4.5840000e-02
  -6.2070000e-02
  -2.3630000e-02
   3.0760000e-02
   2.4050000e-02
   9.4040000e-02
   7.8720000e-02
   4.5760000e-02
   3.9730000e-02
  -2.8130000e-02
  -1.7740000e-02
   1.2780000e-02
   2.3610000e-02
   6.4460000e-02
   1.0674000e-01
   1.1190000e-02
  -1.6230000e-02
  -7.9790000e-02
  -1.1392000e-01
  -1.1867000e-01
  -9.8920000e-02
  -3.9400000e-02
   5.9500000e-02
   1.3180000e-01
   9.9970000e-02
   1.0775000e-01
   1.0896000e-01
   4.1320000e-02
   2.4180000e-02
  -6.2500000e-03
   4.5500000e-03
   3.1780000e-02
  -4.0850000e-02
  -3.7120000e-02
  -3.5310000e-02
  -1.3139000e-01
  -1.2645000e-01
  -4.0500000e-02
   1.2390000e-02
   3.4110000e-02
   3.8170000e-02
   7.4500000e-02
   9.7360000e-02
   7.6170000e-02
   1.0800000e-02
   6.6650000e-02
   2.1800000e-02
  -6.6760000e-02
  -1.9360000e-02
   2.1060000e-02
  -4.3790000e-02
  -1.1505000e-01
  -5.5220000e-02
  -4.3400000e-02
  -3.5900000e-03
   3.4440000e-02
   7.5400000e-02
   1.5338000e-01
   1.3750000e-01
   1.5790000e-02
   6.6100000e-03
   1.2690000e-02
  -4.0550000e-02
  -1.1126000e-01
  -5.6230000e-02
   8.0900000e-03
   5.3820000e-02
   3.8140000e-02
   1.9220000e-02
   7.1890000e-02
   1.5850000e-02
  -4.6940000e-02
  -6.0590000e-02
  -3.8190000e-02
   1.9060000e-02
   5.7000000e-03
  -1.9060000e-02
   1.8900000e-03
   3.7400000e-02
   3.4190000e-02
   4.0360000e-02
   5.4370000e-02
   1.0062000e-01
   8.9850000e-02
   1.0010000e-02
   1.3870000e-02
  -2.6900000e-03
  -8.0940000e-02
  -8.3270000e-02
  -4.0880000e-02
  -2.9780000e-02
   4.6300000e-03
   2.9340000e-02
   2.8160000e-02
   2.3740000e-02
   4.7410000e-02
  -2.1030000e-02
  -6.3800000e-02
   2.8020000e-02
   2.0480000e-02
  -6.8000000e-03
   6.9090000e-02
   1.3131000e-01
   9.9030000e-02
   4.1810000e-02
  -3.8330000e-02
  -7.5260000e-02
  -5.0530000e-02
  -1.1156000e-01
  -5.0860000e-02
   5.9000000e-02
   6.6350000e-02
   4.3790000e-02
   2.8600000e-02
   6.7530000e-02
  -1.0250000e-02
  -3.7920000e-02
   5.2940000e-02
   1.0213000e-01
   3.2710000e-02
  -2.2620000e-02
   5.4370000e-02
  -4.9300000e-02
  -1.5872000e-01
  -9.0370000e-02
  -5.2590000e-02
  -1.0400000e-03
   5.1130000e-02
   4.6640000e-02
   5.7170000e-02
   5.9800000e-02
  -2.4430000e-02
  -7.7130000e-02
  -9.8200000e-03
   2.3390000e-02
   1.0100000e-03
   1.9110000e-02
   7.6250000e-02
   7.2630000e-02
  -3.9350000e-02
  -5.7220000e-02
  -6.8850000e-02
  -9.4320000e-02
   5.1800000e-03
   6.1140000e-02
   4.3810000e-02
   1.3237000e-01
   1.0578000e-01
  -3.0630000e-02
  -3.3590000e-02
   2.5800000e-03
  -7.6800000e-03
   2.4620000e-02
   3.3750000e-02
   4.3270000e-02
   4.6720000e-02
  -2.3090000e-02
  -4.9630000e-02
  -5.2640000e-02
  -8.6590000e-02
  -7.9460000e-02
  -2.2840000e-02
   7.7130000e-02
   7.8940000e-02
   8.8150000e-02
   1.6445000e-01
   1.4301000e-01
   3.6160000e-02
   3.3700000e-03
   7.5900000e-03
  -6.1010000e-02
  -6.1610000e-02
  -2.5750000e-02
  -6.7890000e-02
  -7.4390000e-02
  -1.2040000e-02
  -7.3500000e-03
   2.5720000e-02
   5.7880000e-02
   2.0340000e-02
   1.8100000e-02
   5.8070000e-02
   7.9460000e-02
   7.8720000e-02
   6.7830000e-02
  -2.2950000e-02
  -3.1670000e-02
  -4.5400000e-02
  -1.0770000e-01
  -1.0230000e-01
  -2.7230000e-02
   2.6760000e-02
  -4.2000000e-02
  -7.8100000e-03
   5.2590000e-02
  -7.4300000e-03
  -4.3400000e-02
   3.2790000e-02
   5.8320000e-02
   4.7760000e-02
   1.1209000e-01
   4.8910000e-02
  -1.4500000e-03
  -7.7900000e-03
  -8.4670000e-02
  -6.2180000e-02
  -1.8840000e-02
  -5.6180000e-02
  -1.0530000e-02
   4.3180000e-02
   7.4630000e-02
   1.7710000e-02
   7.9200000e-03
   6.0730000e-02
   1.8920000e-02
   2.7200000e-02
   5.2070000e-02
   4.1590000e-02
  -9.7900000e-03
  -1.8010000e-02
  -2.2510000e-02
  -7.5040000e-02
  -1.4040000e-02
  -1.0780000e-02
  -7.3800000e-03
   7.8310000e-02
   7.2400000e-03
   2.2570000e-02
   3.8190000e-02
  -3.7560000e-02
  -3.5780000e-02
   1.0830000e-02
   8.3600000e-03
   1.0890000e-02
   4.5350000e-02
  -1.3380000e-02
   4.6800000e-02
   4.5190000e-02
  -9.4840000e-02
  -2.1300000e-02
   5.8760000e-02
   1.4280000e-02
   3.1800000e-03
   6.3770000e-02
   9.8070000e-02
   7.3500000e-03
  -3.7340000e-02
   2.1770000e-02
   2.7640000e-02
  -5.1850000e-02
  -3.7540000e-02
   3.9620000e-02
   8.7700000e-03
   7.7000000e-04
  -4.6300000e-03
  -3.4740000e-02
   1.4000000e-04
  -3.3560000e-02
  -5.8180000e-02
   2.0120000e-02
   7.4550000e-02
   4.2910000e-02
   2.1440000e-02
   4.8040000e-02
   6.1610000e-02
   3.1390000e-02
  -2.1550000e-02
   1.7520000e-02
   3.3010000e-02
  -4.5760000e-02
  -1.9060000e-02
   3.8820000e-02
   1.2260000e-02
  -3.3000000e-04
  -3.0200000e-03
  -1.5440000e-02
   6.4160000e-02
   4.6690000e-02
  -1.0984000e-01
  -2.4870000e-02
  -7.7900000e-03
  -6.6820000e-02
   4.5490000e-02
   6.1390000e-02
   4.0060000e-02
   1.0753000e-01
   8.9360000e-02
   9.1300000e-03
  -2.0700000e-02
   1.2830000e-02
  -1.0457000e-01
  -1.5428000e-01
  -7.5290000e-02
  -3.5120000e-02
   3.0630000e-02
   4.2770000e-02
   1.1433000e-01
   7.2630000e-02
   8.9900000e-03
   1.3570000e-02
  -5.0200000e-02
  -3.8410000e-02
   1.0140000e-02
   1.8950000e-02
   8.0970000e-02
   9.5690000e-02
   5.4340000e-02
   4.3180000e-02
   1.0390000e-02
  -7.2600000e-02
  -8.8480000e-02
  -3.9760000e-02
  -3.6880000e-02
  -5.7820000e-02
  -2.7750000e-02
   2.3580000e-02
   2.3630000e-02
   2.0670000e-02
   6.5230000e-02
   1.0877000e-01
   9.7530000e-02
   9.2290000e-02
   8.8920000e-02
   2.8100000e-02
  -2.3140000e-02
  -1.0838000e-01
  -1.2900000e-01
  -8.6640000e-02
  -9.3550000e-02
  -9.4950000e-02
  -7.8400000e-03
   1.1129000e-01
   1.1082000e-01
   7.7180000e-02
   1.1165000e-01
   1.3885000e-01
   2.7940000e-02
  -1.6560000e-02
  -1.9770000e-02
  -3.8930000e-02
  -7.1860000e-02
  -1.0013000e-01
  -1.1299000e-01
   1.7360000e-02
   7.0050000e-02
   6.1660000e-02
   7.7020000e-02
   9.5880000e-02
   1.3295000e-01
  -1.7490000e-02
  -5.1710000e-02
  -6.5340000e-02
  -5.5690000e-02
  -4.4060000e-02
  -5.2890000e-02
   4.3350000e-02
   6.3090000e-02
   3.8470000e-02
   6.0760000e-02
   2.2890000e-02
  -1.1210000e-02
  -2.6180000e-02
  -4.6500000e-02
  -3.6360000e-02
  -3.9780000e-02
   1.5740000e-02
  -1.5190000e-02
   3.1280000e-02
   7.3650000e-02
   7.6800000e-03
   3.2330000e-02
   6.1830000e-02
   7.1400000e-02
   6.6000000e-02
   5.2230000e-02
   1.5350000e-02
  -4.1350000e-02
  -1.0965000e-01
  -1.2714000e-01
  -7.3010000e-02
  -3.1060000e-02
  -9.6000000e-03
   4.1400000e-02
   8.1710000e-02
   9.0290000e-02
   2.0810000e-02
  -3.8100000e-03
   3.5810000e-02
   6.6930000e-02
   7.7430000e-02
   5.5770000e-02
   6.6000000e-02
   6.0900000e-03
  -1.0649000e-01
  -1.3336000e-01
  -1.1817000e-01
  -1.0751000e-01
  -4.9110000e-02
   8.6310000e-02
   1.7158000e-01
   1.6275000e-01
   1.7057000e-01
   1.1518000e-01
   1.8670000e-02
  -7.8660000e-02
  -8.0140000e-02
  -1.1240000e-02
  -3.9870000e-02
  -2.3000000e-02
   7.9800000e-03
   6.7200000e-03
  -2.7230000e-02
  -8.1020000e-02
  -4.0410000e-02
  -1.6310000e-02
   7.1560000e-02
   1.0816000e-01
   8.1730000e-02
   9.7090000e-02
   3.0080000e-02
  -3.7970000e-02
  -6.4950000e-02
  -6.4050000e-02
  -5.2230000e-02
  -6.3660000e-02
   8.8000000e-03
   3.5750000e-02
  -1.5790000e-02
   5.2620000e-02
   6.0070000e-02
   3.6700000e-03
   3.2740000e-02
   6.2900000e-02
   1.3930000e-02
   5.9200000e-03
   1.4800000e-03
  -1.3080000e-02
  -2.2920000e-02
  -3.5750000e-02
  -7.9650000e-02
  -2.6870000e-02
   3.4570000e-02
   2.6000000e-03
   9.6950000e-02
   8.5240000e-02
   2.6050000e-02
   2.2590000e-02
  -3.3180000e-02
  -4.2310000e-02
  -4.8530000e-02
  -5.3680000e-02
   3.2220000e-02
   9.4040000e-02
   4.5710000e-02
   1.6590000e-02
   1.3020000e-02
  -6.0810000e-02
  -2.5640000e-02
  -3.3560000e-02
  -7.1200000e-02
   6.7260000e-02
   5.6260000e-02
   1.5600000e-03
   4.0770000e-02
   4.2720000e-02
  -9.3500000e-03
  -1.3900000e-02
   2.2590000e-02
   5.5770000e-02
   6.7910000e-02
   2.7360000e-02
  -1.4000000e-03
   6.1700000e-03
  -8.7820000e-02
  -1.4957000e-01
  -4.6970000e-02
   3.4270000e-02
   4.7130000e-02
   8.7680000e-02
   8.3570000e-02
   6.4270000e-02
   5.4620000e-02
  -6.9100000e-03
  -2.0870000e-02
  -1.1190000e-02
  -5.7000000e-03
  -4.6300000e-03
   1.3650000e-02
   4.4310000e-02
  -7.4300000e-03
  -6.2810000e-02
  -2.9340000e-02
  -1.8120000e-02
  -2.5660000e-02
   2.1140000e-02
   9.5390000e-02
   9.0260000e-02
   7.0790000e-02
   7.8200000e-02
   8.3840000e-02
  -4.7200000e-03
  -7.0440000e-02
   2.2040000e-02
  -2.1990000e-02
  -9.5800000e-02
  -2.6710000e-02
  -2.3610000e-02
  -4.8040000e-02
  -3.3700000e-02
   2.1390000e-02
   8.3950000e-02
   9.7390000e-02
   4.0550000e-02
   4.5840000e-02
   6.5230000e-02
  -3.9920000e-02
  -4.0800000e-02
  -9.3200000e-03
  -6.4080000e-02
  -8.8890000e-02
  -6.8220000e-02
  -5.4970000e-02
   1.5330000e-02
   2.2650000e-02
   4.1000000e-04
   1.0742000e-01
   9.1850000e-02
  -2.9830000e-02
   2.9690000e-02
   5.0260000e-02
  -1.1430000e-02
   1.2260000e-02
   3.2460000e-02
   2.5800000e-02
  -1.1650000e-02
  -3.6440000e-02
  -3.7730000e-02
  -2.1000000e-02
  -4.7630000e-02
  -3.1200000e-02
   2.1630000e-02
   6.6680000e-02
   9.7860000e-02
   1.3876000e-01
   9.5800000e-02
   5.8540000e-02
   6.3300000e-03
  -4.8670000e-02
  -6.7700000e-02
  -6.8520000e-02
  -7.0600000e-02
  -2.7170000e-02
  -1.0860000e-02
  -1.3110000e-02
   4.3050000e-02
   6.2620000e-02
   3.3830000e-02
   1.0559000e-01
   1.1647000e-01
   5.5170000e-02
   8.5460000e-02
   1.1080000e-02
  -8.6310000e-02
  -8.2830000e-02
  -1.4943000e-01
  -1.4611000e-01
   3.7840000e-02
   6.2180000e-02
   7.0660000e-02
   1.6385000e-01
   1.1982000e-01
   4.2500000e-03
  -8.0830000e-02
  -1.0164000e-01
  -9.7750000e-02
  -5.1130000e-02
   7.9460000e-02
   1.2659000e-01
   1.0430000e-01
   8.5000000e-02
   3.9890000e-02
  -8.3930000e-02
  -1.3243000e-01
  -8.2450000e-02
  -1.1488000e-01
  -4.4360000e-02
   4.3400000e-02
   8.1790000e-02
   1.4743000e-01
   4.5620000e-02
  -1.6940000e-02
   8.6200000e-02
   3.7730000e-02
   1.6860000e-02
   8.8420000e-02
   4.6800000e-02
  -2.3140000e-02
  -3.9100000e-02
  -1.4447000e-01
  -1.5820000e-01
  -4.8800000e-02
  -8.5190000e-02
   3.9510000e-02
   1.4691000e-01
   9.0590000e-02
   1.6673000e-01
   8.7050000e-02
  -8.3160000e-02
  -3.3780000e-02
  -8.0170000e-02
  -9.6070000e-02
   1.7160000e-02
   5.8400000e-03
   4.0740000e-02
   1.1529000e-01
  -2.9470000e-02
  -8.1400000e-02
   2.1700000e-03
  -9.7470000e-02
  -8.1760000e-02
   3.9400000e-02
   5.5600000e-02
   1.5746000e-01
   1.2711000e-01
   2.0320000e-02
   9.8870000e-02
   3.1910000e-02
  -4.4860000e-02
  -9.3000000e-04
  -2.8800000e-03
  -1.6500000e-03
   2.2700000e-02
  -8.6280000e-02
  -6.0700000e-02
   4.1100000e-03
  -1.4436000e-01
  -7.5150000e-02
   7.8500000e-02
   1.1214000e-01
   1.5425000e-01
   1.8244000e-01
   8.6370000e-02
   9.7310000e-02
  -1.7960000e-02
  -1.9620000e-01
  -1.2352000e-01
  -1.2294000e-01
  -8.7600000e-02
   1.7080000e-02
   1.9710000e-02
   9.8810000e-02
   7.3370000e-02
  -5.5710000e-02
   4.1890000e-02
   6.9970000e-02
   3.3750000e-02
   9.8240000e-02
   1.2357000e-01
   3.1120000e-02
  -3.0300000e-02
  -9.2590000e-02
  -1.4894000e-01
  -1.0718000e-01
  -1.1677000e-01
  -4.7270000e-02
   1.3092000e-01
   1.4430000e-01
   1.3131000e-01
   1.2061000e-01
   3.9780000e-02
   6.1100000e-03
  -4.8010000e-02
  -8.1570000e-02
  -3.0870000e-02
   1.5900000e-02
  -2.4460000e-02
  -1.4150000e-02
  -3.4880000e-02
  -5.8430000e-02
  -6.7260000e-02
  -1.1483000e-01
  -1.8290000e-02
   7.1750000e-02
   8.5300000e-02
   1.6651000e-01
   1.4389000e-01
   6.5280000e-02
   7.2470000e-02
  -3.8900000e-03
  -4.6670000e-02
  -1.9800000e-02
  -6.2980000e-02
  -8.9270000e-02
  -2.9750000e-02
  -5.2450000e-02
  -7.2800000e-02
   3.9800000e-03
  -2.7500000e-02
  -1.0940000e-02
   1.1121000e-01
   1.1719000e-01
   1.4438000e-01
   1.4600000e-01
   1.6420000e-02
  -4.5000000e-03
  -1.0780000e-02
  -6.6300000e-02
  -7.2300000e-02
  -4.7300000e-02
  -5.5060000e-02
  -1.2150000e-02
  -1.5600000e-02
  -2.5750000e-02
   3.9400000e-02
   2.5550000e-02
   4.2960000e-02
   1.1510000e-01
   9.9470000e-02
   1.4389000e-01
   1.3402000e-01
   8.2300000e-03
  -1.2480000e-02
  -8.1320000e-02
  -1.7092000e-01
  -1.4943000e-01
  -9.4240000e-02
  -3.4030000e-02
   4.6900000e-03
   6.1750000e-02
   1.1809000e-01
   1.4619000e-01
   1.1102000e-01
   9.9230000e-02
   8.4060000e-02
   1.3700000e-03
  -5.3490000e-02
  -7.5320000e-02
  -6.8710000e-02
  -1.0685000e-01
  -1.0567000e-01
  -5.3140000e-02
  -2.4790000e-02
  -2.8790000e-02
   6.8500000e-03
   6.8300000e-02
   7.7980000e-02
   1.6108000e-01
   1.1834000e-01
   3.1700000e-02
   7.2690000e-02
  -1.1350000e-02
  -1.3523000e-01
  -1.6939000e-01
  -1.4068000e-01
  -7.5560000e-02
   3.3200000e-03
   3.4930000e-02
   1.0134000e-01
   1.1688000e-01
   1.5380000e-02
  -2.9900000e-03
  -9.9500000e-03
  -1.2090000e-02
  -2.1550000e-02
  -7.2900000e-03
   7.5070000e-02
   1.2300000e-01
   8.1210000e-02
   2.3250000e-02
   1.6480000e-02
  -5.7280000e-02
  -1.4501000e-01
  -5.2420000e-02
  -3.2160000e-02
  -2.3220000e-02
   8.1680000e-02
   6.3720000e-02
   3.3720000e-02
   8.0060000e-02
   5.6780000e-02
   2.8380000e-02
   7.9730000e-02
   8.3080000e-02
  -4.1700000e-02
  -1.6450000e-02
  -9.7600000e-03
  -9.5060000e-02
  -4.9430000e-02
  -2.7690000e-02
  -3.5070000e-02
   8.9700000e-03
   1.6310000e-02
   4.5190000e-02
   4.7710000e-02
   1.9030000e-02
   2.6620000e-02
  -3.6700000e-03
  -4.9160000e-02
  -2.8500000e-03
   2.9170000e-02
  -1.8900000e-03
   2.9420000e-02
   4.6060000e-02
   3.7750000e-02
   4.0280000e-02
   6.0350000e-02
   1.4500000e-02
  -5.5550000e-02
  -5.3990000e-02
  -6.5940000e-02
  -8.1210000e-02
  -5.6620000e-02
   1.2090000e-02
   7.3070000e-02
   9.6460000e-02
   1.5922000e-01
   8.2970000e-02
   5.0450000e-02
   6.4600000e-02
  -6.7170000e-02
  -9.1000000e-02
  -4.2310000e-02
  -1.2404000e-01
  -1.1332000e-01
  -3.4990000e-02
  -2.5310000e-02
  -1.3540000e-02
   5.0830000e-02
   8.3490000e-02
   8.4260000e-02
   1.1543000e-01
   1.0136000e-01
   7.5560000e-02
  -5.8700000e-03
  -6.2900000e-02
  -4.8260000e-02
  -1.2259000e-01
  -1.3243000e-01
  -4.6200000e-02
  -5.6290000e-02
   2.0370000e-02
   1.1288000e-01
   1.9330000e-02
   9.0230000e-02
   1.1453000e-01
  -3.5480000e-02
  -2.6070000e-02
  -1.7250000e-02
   2.2000000e-04
  -1.3160000e-02
   2.7770000e-02
   9.0800000e-03
  -3.7800000e-03
  -1.8290000e-02
  -7.6280000e-02
   2.9830000e-02
  -2.2210000e-02
  -5.3600000e-02
  -5.5000000e-04
  -5.3520000e-02
   9.2100000e-03
   6.3910000e-02
   4.4120000e-02
   9.4350000e-02
   1.3240000e-01
   7.3150000e-02
   7.3860000e-02
   6.8710000e-02
  -3.0240000e-02
  -5.4120000e-02
  -3.0160000e-02
  -9.9860000e-02
  -1.1430000e-02
   2.3830000e-02
   8.2300000e-03
   6.5940000e-02
   5.0940000e-02
   5.6730000e-02
   2.7200000e-02
   9.9300000e-03
   7.1180000e-02
   2.6050000e-02
  -1.5790000e-02
   1.8810000e-02
  -5.4070000e-02
  -8.9520000e-02
   1.6700000e-02
   7.5320000e-02
  -1.2830000e-02
   7.3540000e-02
   1.0315000e-01
   5.5470000e-02
   7.4250000e-02
  -4.6300000e-03
  -2.9200000e-02
  -4.2690000e-02
  -3.4380000e-02
  -6.6930000e-02
  -7.7650000e-02
  -4.5400000e-02
  -4.5080000e-02
  -2.3830000e-02
   5.6120000e-02
   8.6230000e-02
   5.5710000e-02
   1.0570000e-01
   1.1954000e-01
  -5.1270000e-02
  -8.3680000e-02
  -6.4820000e-02
  -1.3235000e-01
  -1.0260000e-01
  -3.5120000e-02
  -3.3120000e-02
   2.7610000e-02
   8.0470000e-02
  -1.0580000e-02
   7.2100000e-03
   2.7250000e-02
  -2.7530000e-02
   6.8300000e-03
   5.6870000e-02
   9.0670000e-02
   7.3540000e-02
   5.0400000e-03
   2.6490000e-02
  -5.0040000e-02
  -8.8010000e-02
  -5.5660000e-02
  -5.2070000e-02
  -2.5770000e-02
   1.4200000e-02
  -3.5670000e-02
  -5.0200000e-03
   5.3110000e-02
   7.3200000e-03
   3.6270000e-02
   1.5368000e-01
   1.8384000e-01
   1.0888000e-01
   1.2664000e-01
   5.3490000e-02
  -6.6490000e-02
  -1.1403000e-01
  -1.1817000e-01
  -1.5664000e-01
  -6.2760000e-02
  -4.5460000e-02
  -3.6410000e-02
   5.7390000e-02
   1.1930000e-01
   5.6070000e-02
   9.1080000e-02
   1.6777000e-01
   3.4270000e-02
   6.8350000e-02
   5.1710000e-02
  -4.9540000e-02
  -1.0603000e-01
  -1.0471000e-01
  -1.4855000e-01
  -9.1660000e-02
  -1.8640000e-02
   3.6110000e-02
   7.8360000e-02
   1.3383000e-01
   1.3610000e-01
   8.0500000e-02
   2.3280000e-02
   3.7650000e-02
  -1.5270000e-02
  -1.0120000e-01
   4.1680000e-02
   6.4700000e-03
  -4.3900000e-02
   9.6800000e-03
  -4.0170000e-02
  -4.3460000e-02
   2.5860000e-02
  -1.3700000e-03
   2.2320000e-02
   1.0317000e-01
   4.3840000e-02
   4.4100000e-03
   7.0110000e-02
   1.4720000e-02
  -7.6390000e-02
  -8.2670000e-02
  -5.3550000e-02
   3.9260000e-02
  -3.6000000e-04
   1.8450000e-02
   7.6410000e-02
  -7.5900000e-03
  -2.6290000e-02
   2.9600000e-03
  -1.3740000e-02
  -7.4000000e-04
   5.5990000e-02
   4.5100000e-02
   2.6400000e-02
   3.1150000e-02
  -3.1200000e-02
  -5.2070000e-02
  -4.5730000e-02
  -7.2770000e-02
  -5.8240000e-02
   2.0540000e-02
   6.1420000e-02
   1.2390000e-02
  -2.9580000e-02
  -3.8740000e-02
  -5.9910000e-02
  -2.7280000e-02
   5.2830000e-02
   8.9740000e-02
   1.1631000e-01
   7.7070000e-02
   1.1779000e-01
   6.7910000e-02
  -5.0010000e-02
  -4.6830000e-02
  -7.8250000e-02
  -9.7690000e-02
  -9.5610000e-02
  -3.8330000e-02
   1.5660000e-02
   4.7380000e-02
   6.5690000e-02
   7.0380000e-02
   7.8660000e-02
   1.9380000e-02
   8.1790000e-02
   1.1313000e-01
   4.3210000e-02
   7.2140000e-02
  -1.5960000e-02
  -8.4090000e-02
  -1.1400000e-01
  -1.5146000e-01
  -1.2865000e-01
  -1.3080000e-02
   4.6280000e-02
   8.6370000e-02
   1.5201000e-01
   1.1066000e-01
   1.0115000e-01
   7.9950000e-02
   3.8400000e-03
   1.1430000e-02
   5.1000000e-03
  -5.6200000e-03
   1.2090000e-02
   2.3220000e-02
  -1.3300000e-02
  -8.3210000e-02
  -7.8140000e-02
  -5.6260000e-02
  -5.9660000e-02
  -4.5650000e-02
   7.3730000e-02
   1.1771000e-01
   1.5960000e-02
   1.9910000e-02
   7.3450000e-02
   2.1880000e-02
  -1.4480000e-02
  -1.2970000e-02
  -1.5520000e-02
   4.5270000e-02
  -5.7300000e-03
  -7.4030000e-02
   5.4800000e-03
   2.5120000e-02
  -9.7830000e-02
  -9.1490000e-02
   5.8920000e-02
   5.0720000e-02
   6.3000000e-04
   5.5880000e-02
   8.0800000e-02
  -2.8160000e-02
  -7.1200000e-02
  -3.6050000e-02
   2.7250000e-02
   6.2000000e-03
   1.4640000e-02
   7.5780000e-02
   8.5190000e-02
   3.6700000e-03
  -2.9860000e-02
   3.0240000e-02
   3.8330000e-02
  -6.0590000e-02
  -3.2570000e-02
   1.7800000e-03
  -9.9000000e-03
  -8.0970000e-02
  -1.0372000e-01
  -2.5610000e-02
   5.9720000e-02
   1.0679000e-01
   6.9920000e-02
   1.4748000e-01
   1.7608000e-01
   4.2060000e-02
  -2.8650000e-02
  -6.5200000e-02
  -5.9550000e-02
  -9.6210000e-02
  -1.4263000e-01
  -5.6730000e-02
  -2.5140000e-02
   6.2200000e-03
   1.0670000e-02
   6.6570000e-02
   1.4310000e-01
   1.1683000e-01
   1.2848000e-01
   1.4427000e-01
   7.6660000e-02
   1.4860000e-02
  -7.7350000e-02
  -1.4227000e-01
  -1.6654000e-01
  -7.8770000e-02
  -4.2280000e-02
  -5.2040000e-02
   8.6780000e-02
   9.6790000e-02
  -1.8290000e-02
  -3.4800000e-03
   5.9520000e-02
   6.1860000e-02
   4.7710000e-02
   2.6790000e-02
   7.6500000e-02
   1.0838000e-01
  -2.7060000e-02
  -1.4907000e-01
  -9.2400000e-02
  -1.1313000e-01
  -1.4707000e-01
  -2.2040000e-02
   1.1184000e-01
   1.4669000e-01
   1.1872000e-01
   1.0967000e-01
   1.1239000e-01
   3.9650000e-02
  -9.0620000e-02
  -7.8140000e-02
  -2.7340000e-02
   6.5800000e-03
   1.5050000e-02
  -8.8000000e-04
   6.0460000e-02
   3.4460000e-02
  -7.0440000e-02
  -6.9970000e-02
  -2.9720000e-02
  -1.7000000e-03
   1.1790000e-02
   1.5630000e-02
   7.1810000e-02
   7.3920000e-02
   1.1100000e-02
  -1.7740000e-02
  -2.3600000e-03
   2.2730000e-02
   1.8260000e-02
  -4.8800000e-02
  -5.9030000e-02
  -1.4200000e-02
  -9.6200000e-03
  -7.2160000e-02
  -1.7270000e-02
   5.9660000e-02
   6.0840000e-02
   8.7220000e-02
   1.2651000e-01
   1.1891000e-01
   4.8910000e-02
  -8.3730000e-02
  -5.1680000e-02
   1.2150000e-02
  -7.2880000e-02
  -5.8540000e-02
   2.1800000e-02
   8.2250000e-02
   6.9720000e-02
  -3.4410000e-02
  -1.8100000e-03
   3.5100000e-02
  -1.5617000e-01
  -6.8410000e-02
  -1.0340000e-02
  -1.6370000e-02
   7.1200000e-02
   1.3786000e-01
   8.1100000e-02
   1.2919000e-01
   6.1440000e-02
  -4.8280000e-02
   2.9260000e-02
  -7.0740000e-02
  -1.2906000e-01
   1.2750000e-02
  -7.6500000e-03
  -7.4960000e-02
   3.2050000e-02
   1.4860000e-02
   1.1430000e-02
   8.4530000e-02
   7.8610000e-02
   4.1240000e-02
   9.0560000e-02
   4.2170000e-02
   8.5500000e-03
  -8.1020000e-02
  -1.3010000e-01
   2.3000000e-03
  -3.0430000e-02
  -2.2780000e-02
   1.0943000e-01
   8.7270000e-02
   5.2200000e-02
  -4.8000000e-03
  -1.0688000e-01
  -8.9000000e-02
  -5.2010000e-02
  -7.7920000e-02
   2.0870000e-02
   1.4915000e-01
   7.7980000e-02
   1.3147000e-01
   8.6610000e-02
  -7.3290000e-02
   9.0500000e-03
  -4.7130000e-02
  -1.0501000e-01
   3.5920000e-02
   9.4300000e-03
  -2.7910000e-02
   6.6300000e-02
  -2.5990000e-02
  -5.4210000e-02
   1.6450000e-02
  -3.7450000e-02
   2.5720000e-02
   1.1255000e-01
   4.6890000e-02
   6.8220000e-02
   9.6650000e-02
  -7.2470000e-02
  -9.0750000e-02
  -3.2380000e-02
  -9.3140000e-02
  -2.5090000e-02
   8.0360000e-02
   1.3923000e-01
   2.0161000e-01
   9.0320000e-02
  -3.2850000e-02
  -1.3000000e-02
  -7.9100000e-02
  -1.1291000e-01
  -5.0260000e-02
   0.0000000e+00
   3.1230000e-02
   3.6250000e-02
   2.0540000e-02
   5.1710000e-02
   1.1240000e-02
  -4.3240000e-02
   1.8900000e-03
   4.0030000e-02
   2.9640000e-02
   1.7000000e-03
   1.2670000e-02
   1.2090000e-02
  -7.1890000e-02
  -1.5508000e-01
  -4.1460000e-02
   5.2530000e-02
   5.5820000e-02
   1.5165000e-01
   1.6026000e-01
   1.1749000e-01
   4.7840000e-02
  -1.0597000e-01
  -9.1470000e-02
  -5.5250000e-02
  -1.6338000e-01
  -1.1825000e-01
   8.1790000e-02
   8.1430000e-02
  -1.9960000e-02
   1.6010000e-02
   6.3170000e-02
   3.1830000e-02
   2.1770000e-02
   3.1890000e-02
   5.6590000e-02
   5.2830000e-02
   3.7400000e-02
   5.4230000e-02
  -5.3080000e-02
  -5.0920000e-02
  -8.4940000e-02
  -8.0970000e-02
   1.8120000e-02
  -8.6600000e-03
   6.0840000e-02
   1.4164000e-01
  -1.3190000e-02
  -1.3740000e-02
   3.8300000e-02
   4.5490000e-02
   2.0450000e-02
   4.8340000e-02
   4.4500000e-02
   5.2750000e-02
  -1.0060000e-02
  -9.4540000e-02
  -6.8680000e-02
  -1.0959000e-01
  -1.3492000e-01
  -4.1790000e-02
   3.0980000e-02
   5.4730000e-02
   1.7715000e-01
   1.3353000e-01
   8.2940000e-02
   5.6780000e-02
  -5.2040000e-02
  -3.2380000e-02
  -5.3700000e-03
  -5.3140000e-02
   6.7200000e-03
   4.5430000e-02
  -9.6200000e-03
  -9.6800000e-03
  -3.3830000e-02
  -7.9050000e-02
  -4.6640000e-02
  -2.2500000e-03
   6.8270000e-02
   1.4592000e-01
   9.8870000e-02
   8.8530000e-02
   6.4410000e-02
  -3.9950000e-02
  -1.1562000e-01
  -7.2660000e-02
  -5.5990000e-02
   8.3100000e-03
   1.8900000e-03
   5.4800000e-03
   1.2154000e-01
   3.5780000e-02
  -4.4440000e-02
   4.0090000e-02
  -1.0450000e-02
  -3.5120000e-02
   1.9520000e-02
   4.4170000e-02
   2.5660000e-02
   3.5310000e-02
  -1.8040000e-02
  -5.3820000e-02
  -8.2500000e-03
  -3.9130000e-02
  -3.0000000e-04
   3.9260000e-02
   3.1230000e-02
   6.2980000e-02
  -2.0260000e-02
  -6.7280000e-02
  -6.2800000e-03
  -4.4610000e-02
  -5.2450000e-02
   5.9960000e-02
   1.1760000e-01
   7.3670000e-02
   4.7900000e-02
   5.0700000e-03
  -4.0220000e-02
  -1.3386000e-01
  -2.0533000e-01
  -9.6200000e-03
   1.5291000e-01
   1.1211000e-01
   1.4244000e-01
   1.5033000e-01
   1.2058000e-01
   3.1450000e-02
  -9.4700000e-02
  -5.2260000e-02
   7.6720000e-02
  -1.2910000e-02
  -9.3910000e-02
  -1.2480000e-02
  -2.9040000e-02
  -1.6366000e-01
  -1.8420000e-01
  -2.7200000e-02
   1.1900000e-02
   6.8680000e-02
   1.6462000e-01
   2.6014000e-01
   2.4095000e-01
   1.0235000e-01
  -1.2830000e-02
  -2.8000000e-03
  -6.3500000e-02
  -1.6700000e-01
  -1.0353000e-01
  -2.4100000e-02
  -6.8960000e-02
  -7.5620000e-02
  -3.3230000e-02
  -7.9620000e-02
  -1.9800000e-02
   1.8560000e-02
   6.8190000e-02
   2.1896000e-01
   1.6720000e-01
   8.8810000e-02
   1.0180000e-01
   2.0370000e-02
  -6.7720000e-02
  -8.7820000e-02
  -1.2629000e-01
  -1.3229000e-01
  -6.8600000e-02
  -3.7540000e-02
  -2.7100000e-03
   4.2440000e-02
   9.9300000e-03
   8.6200000e-02
   1.2259000e-01
   2.9150000e-02
   8.0990000e-02
   8.9030000e-02
   1.7470000e-02
   2.2570000e-02
  -3.9920000e-02
  -1.0161000e-01
  -1.8040000e-02
  -4.7240000e-02
  -1.6090000e-02
   6.2270000e-02
   2.3580000e-02
   2.9890000e-02
   5.4970000e-02
   3.2410000e-02
   5.1300000e-03
   3.2080000e-02
   1.5300000e-02
   2.2570000e-02
   1.1930000e-02
  -4.8090000e-02
   1.5460000e-02
  -6.2500000e-03
  -9.0070000e-02
  -5.8510000e-02
  -3.4490000e-02
   2.9360000e-02
   7.4500000e-02
   8.5760000e-02
   1.5017000e-01
   1.4049000e-01
   5.2640000e-02
   1.3200000e-03
  -6.6930000e-02
  -9.9720000e-02
  -1.5711000e-01
  -1.4274000e-01
  -1.0139000e-01
  -2.1110000e-02
   5.5630000e-02
   3.6440000e-02
   1.3081000e-01
   1.6177000e-01
   9.8210000e-02
   7.9490000e-02
   3.9980000e-02
  -7.0990000e-02
  -1.3514000e-01
  -1.6248000e-01
  -1.3512000e-01
  -9.2230000e-02
  -3.3780000e-02
   6.2500000e-03
   1.8389000e-01
   2.0459000e-01
   1.3997000e-01
   1.3599000e-01
   7.6440000e-02
  -5.1300000e-03
  -6.8190000e-02
  -1.2409000e-01
  -9.0120000e-02
  -7.1000000e-04
  -9.5690000e-02
  -8.8260000e-02
   7.5370000e-02
   1.1894000e-01
   5.2180000e-02
   7.4850000e-02
   7.6000000e-02
   7.1670000e-02
   1.6750000e-02
  -9.6570000e-02
  -3.1150000e-02
  -5.0070000e-02
  -1.1708000e-01
  -9.8380000e-02
  -4.5210000e-02
   2.5390000e-02
   6.6130000e-02
   5.5880000e-02
   8.7330000e-02
   1.3290000e-01
   6.8490000e-02
   3.0570000e-02
   2.8760000e-02
   4.9600000e-03
  -3.7370000e-02
  -1.8530000e-02
  -5.3930000e-02
  -1.4123000e-01
  -5.5910000e-02
  -1.0161000e-01
  -7.7730000e-02
  -3.3230000e-02
   2.8840000e-02
   1.3775000e-01
   1.2988000e-01
   1.5768000e-01
   1.2108000e-01
   1.1162000e-01
   3.0760000e-02
  -5.8760000e-02
  -1.6830000e-02
  -1.9080000e-02
  -1.2623000e-01
  -6.0570000e-02
   1.0890000e-02
  -1.0320000e-01
  -3.6160000e-02
   3.8500000e-02
   1.1540000e-02
   7.1890000e-02
   1.2464000e-01
   8.6450000e-02
   1.0929000e-01
   6.6520000e-02
  -2.7000000e-04
  -1.2900000e-03
  -9.2900000e-03
  -4.3790000e-02
  -3.6960000e-02
  -2.1880000e-02
  -3.6330000e-02
  -3.3700000e-02
  -7.8530000e-02
   7.2900000e-03
   3.6220000e-02
  -3.0600000e-02
   6.1030000e-02
   1.0279000e-01
   5.5190000e-02
   1.1170000e-01
   9.6130000e-02
   2.4320000e-02
  -1.8730000e-02
  -8.3650000e-02
  -8.6940000e-02
  -7.9320000e-02
  -1.3235000e-01
  -1.3111000e-01
  -5.4450000e-02
   3.2630000e-02
   4.7950000e-02
   4.5820000e-02
   1.0753000e-01
   1.4732000e-01
   7.3590000e-02
   4.7380000e-02
   7.7980000e-02
   4.6250000e-02
  -2.3280000e-02
  -6.0840000e-02
  -1.2725000e-01
  -1.3369000e-01
  -8.2450000e-02
  -9.8100000e-02
  -7.7300000e-03
   6.2270000e-02
   4.2110000e-02
   9.1800000e-02
   7.2740000e-02
   8.8260000e-02
   5.9250000e-02
  -2.2260000e-02
   1.6290000e-02
   4.4860000e-02
   6.2900000e-02
   4.5130000e-02
  -3.3670000e-02
  -5.0040000e-02
  -4.0360000e-02
  -7.2220000e-02
  -7.9070000e-02
   1.0010000e-02
   1.3700000e-03
   7.0740000e-02
   7.9160000e-02
   1.5190000e-02
   1.0057000e-01
   1.1790000e-01
  -4.5500000e-03
   2.0120000e-02
   7.5980000e-02
  -2.0800000e-03
  -5.5490000e-02
  -3.3530000e-02
   2.7940000e-02
   1.6640000e-02
  -1.3070000e-01
  -2.5090000e-02
   8.5160000e-02
  -4.6200000e-02
  -4.6420000e-02
   8.2800000e-03
   7.6550000e-02
   8.0010000e-02
  -1.4070000e-02
   7.0080000e-02
   1.6328000e-01
  -2.5120000e-02
  -6.5580000e-02
  -1.8340000e-02
  -6.8240000e-02
  -1.2135000e-01
  -7.4550000e-02
  -8.2060000e-02
  -1.4070000e-02
   5.3330000e-02
  -2.0100000e-02
   9.6370000e-02
   1.0759000e-01
   3.3700000e-02
   6.9610000e-02
   5.0530000e-02
   7.4250000e-02
   8.5300000e-03
  -7.7150000e-02
  -4.2220000e-02
  -4.9630000e-02
  -5.9420000e-02
  -4.8340000e-02
  -5.7330000e-02
  -6.0700000e-02
   7.9070000e-02
   7.8850000e-02
   2.5610000e-02
   1.2697000e-01
   5.7030000e-02
   1.6890000e-02
   2.8900000e-02
  -5.7080000e-02
  -5.6970000e-02
  -1.3760000e-02
   9.4600000e-03
   1.1950000e-02
  -2.7000000e-04
   1.8100000e-02
   5.7300000e-02
  -6.3100000e-03
   1.3710000e-02
   2.7140000e-02
  -2.8380000e-02
  -1.0910000e-02
  -3.6700000e-03
  -2.7910000e-02
   2.8380000e-02
   7.8400000e-03
  -4.4880000e-02
   8.5760000e-02
   9.4290000e-02
   6.8000000e-03
   2.5610000e-02
   6.9530000e-02
  -1.4300000e-03
  -6.6240000e-02
  -6.4100000e-02
  -2.7250000e-02
  -6.1940000e-02
  -1.0359000e-01
  -1.3050000e-02
   8.3130000e-02
   3.0190000e-02
   3.0490000e-02
   4.5600000e-02
   8.3760000e-02
   8.3520000e-02
   1.1210000e-02
   5.4210000e-02
   1.1719000e-01
   4.5930000e-02
  -4.4440000e-02
   6.8300000e-03
  -4.1070000e-02
  -8.6610000e-02
  -2.6290000e-02
  -1.5160000e-02
   2.2100000e-02
   2.8020000e-02
   1.6670000e-02
   7.5400000e-02
   5.2590000e-02
  -3.1830000e-02
  -1.5900000e-03
   1.1520000e-02
  -7.8100000e-03
  -1.1300000e-02
  -1.4720000e-02
   2.8870000e-02
   3.2660000e-02
   8.8000000e-04
   3.3700000e-02
   6.6630000e-02
   4.1620000e-02
   6.2950000e-02
  -9.0260000e-02
  -1.5648000e-01
  -9.4950000e-02
  -1.2448000e-01
  -1.4899000e-01
  -6.4400000e-03
   1.1653000e-01
   1.2958000e-01
   1.8447000e-01
   1.3608000e-01
   8.4800000e-02
   5.5470000e-02
  -5.4370000e-02
  -8.8640000e-02
  -3.9240000e-02
  -8.7570000e-02
  -1.3114000e-01
  -6.0240000e-02
  -6.8110000e-02
  -6.6740000e-02
   4.6100000e-03
   6.3090000e-02
   6.8740000e-02
   1.0729000e-01
   1.2634000e-01
   1.1773000e-01
   9.0640000e-02
   2.6430000e-02
   9.6500000e-03
  -1.9550000e-02
  -8.2390000e-02
  -1.2204000e-01
  -1.0221000e-01
  -7.7600000e-03
   6.0370000e-02
   2.5800000e-02
   6.2540000e-02
   8.5220000e-02
   6.3640000e-02
   3.7750000e-02
   5.7300000e-03
   5.3880000e-02
   9.0480000e-02
  -1.3520000e-02
  -4.8670000e-02
   3.4330000e-02
  -7.4930000e-02
  -1.4219000e-01
  -1.0010000e-02
   1.4120000e-02
   3.4220000e-02
   1.7767000e-01
   6.9340000e-02
   8.5240000e-02
   1.2837000e-01
  -3.4190000e-02
  -7.7430000e-02
  -5.4320000e-02
  -4.8580000e-02
  -1.0457000e-01
  -4.0800000e-02
   6.3100000e-03
   6.3000000e-04
  -3.7300000e-03
  -1.6040000e-02
   4.4140000e-02
   3.4660000e-02
   4.2170000e-02
   1.0822000e-01
   4.2500000e-02
   5.6760000e-02
   1.4340000e-02
  -9.8290000e-02
  -8.0390000e-02
  -6.3720000e-02
  -1.1148000e-01
  -4.5950000e-02
   6.1470000e-02
   4.1400000e-02
   7.6740000e-02
   5.5910000e-02
   6.6400000e-03
   5.7300000e-02
   1.0830000e-02
  -5.0070000e-02
  -5.7600000e-03
   7.6110000e-02
   2.6430000e-02
  -3.7890000e-02
   4.4400000e-03
   1.1710000e-02
  -2.1770000e-02
  -2.4070000e-02
   8.2800000e-03
  -1.8100000e-03
  -3.4770000e-02
  -4.2440000e-02
  -3.3480000e-02
   1.1760000e-02
   2.2800000e-03
  -3.4900000e-02
   9.4240000e-02
   1.9135000e-01
   1.0767000e-01
   5.1110000e-02
   6.9400000e-02
   5.5600000e-02
  -6.7670000e-02
  -1.4000000e-01
  -5.4530000e-02
   2.1700000e-03
  -1.5900000e-02
  -5.2750000e-02
  -2.7100000e-03
   4.9380000e-02
  -4.9080000e-02
  -7.4960000e-02
   3.1610000e-02
   1.3344000e-01
   9.1550000e-02
   6.4570000e-02
   1.2774000e-01
   7.8530000e-02
   6.2500000e-03
  -7.8960000e-02
  -1.4419000e-01
  -6.5420000e-02
  -3.2380000e-02
  -7.6030000e-02
  -1.8590000e-02
   9.5440000e-02
   1.0310000e-02
  -2.0480000e-02
   4.2170000e-02
   5.9880000e-02
   1.1773000e-01
   7.7260000e-02
   6.2270000e-02
   6.8960000e-02
  -2.6950000e-02
  -1.2124000e-01
  -7.2440000e-02
  -6.4430000e-02
  -8.1540000e-02
   1.0670000e-02
   9.6050000e-02
   9.5910000e-02
   9.4400000e-02
   1.0463000e-01
   9.2480000e-02
  -1.1380000e-02
  -1.2431000e-01
  -1.1014000e-01
  -3.6520000e-02
  -7.3180000e-02
  -7.5760000e-02
   6.5830000e-02
   1.2730000e-01
   7.2900000e-02
   4.8970000e-02
   5.9580000e-02
   5.3520000e-02
   1.8670000e-02
  -3.8110000e-02
  -5.2940000e-02
  -4.8580000e-02
  -9.8600000e-02
  -2.0169000e-01
  -7.9050000e-02
   5.8840000e-02
  -1.2390000e-02
   4.6640000e-02
   1.7800000e-01
   1.4567000e-01
   5.6870000e-02
   4.4910000e-02
   1.1500000e-03
  -4.1890000e-02
  -8.0360000e-02
  -1.1324000e-01
  -3.0930000e-02
   8.0090000e-02
   3.4790000e-02
   2.1300000e-02
   5.7740000e-02
   3.5310000e-02
  -1.4000000e-04
  -1.3570000e-02
   1.2200000e-02
   2.9060000e-02
   3.1340000e-02
  -7.0200000e-03
  -1.2830000e-02
   6.2380000e-02
   3.6300000e-02
  -5.1050000e-02
  -1.2120000e-02
   1.2120000e-02
   9.6200000e-03
  -1.2170000e-02
   1.6230000e-02
   6.9100000e-03
   3.5400000e-03
  -5.0920000e-02
  -5.7300000e-02
  -1.2390000e-02
  -6.9400000e-03
   1.1570000e-02
   8.0600000e-03
   1.1210000e-02
   8.2670000e-02
   1.2267000e-01
   8.0090000e-02
   5.2830000e-02
   8.5600000e-02
   6.9920000e-02
   3.8100000e-03
  -7.0570000e-02
  -5.7850000e-02
  -1.5550000e-02
  -1.4353000e-01
  -1.7027000e-01
  -5.5910000e-02
  -6.5910000e-02
  -5.3550000e-02
   2.2810000e-02
   5.3050000e-02
   1.4011000e-01
   1.9226000e-01
   1.4351000e-01
   2.0594000e-01
   1.7904000e-01
   2.8510000e-02
  -6.2920000e-02
  -1.5642000e-01
  -2.7380000e-01
  -2.5397000e-01
  -2.1844000e-01
  -1.3218000e-01
   6.1830000e-02
   1.5250000e-01
   1.6711000e-01
   2.7827000e-01
   2.5460000e-01
   1.2615000e-01
   3.6380000e-02
  -6.3990000e-02
  -3.4880000e-02
  -1.3059000e-01
  -1.9319000e-01
  -6.5910000e-02
  -1.1488000e-01
  -1.1082000e-01
  -4.1510000e-02
  -3.0270000e-02
   4.4420000e-02
   1.3665000e-01
   1.8392000e-01
   2.0026000e-01
   2.0802000e-01
   5.0370000e-02
  -6.2100000e-02
  -4.1130000e-02
  -1.8650000e-01
  -2.0525000e-01
  -6.9420000e-02
  -7.4600000e-03
   4.3460000e-02
   5.3140000e-02
   9.9500000e-02
   7.3700000e-02
   2.4270000e-02
   4.7520000e-02
   4.9820000e-02
   2.9060000e-02
   1.0690000e-02
   7.1000000e-03
  -8.0900000e-03
  -2.0020000e-02
  -6.2950000e-02
  -7.7700000e-02
   3.8520000e-02
   3.7950000e-02
  -2.2650000e-02
   3.9920000e-02
   8.4170000e-02
  -1.4500000e-02
  -7.7730000e-02
   2.3660000e-02
   3.6140000e-02
   2.9280000e-02
   1.1965000e-01
   1.1880000e-01
   4.5210000e-02
  -4.1590000e-02
  -1.2322000e-01
  -1.4482000e-01
  -1.4161000e-01
  -7.8110000e-02
  -1.7740000e-02
   5.4210000e-02
   1.4326000e-01
   1.1458000e-01
   1.1357000e-01
   8.1730000e-02
  -4.1100000e-03
   1.1210000e-02
   2.7700000e-03
  -3.9450000e-02
  -4.6450000e-02
  -1.8840000e-02
  -5.5410000e-02
  -1.0328000e-01
  -3.8440000e-02
  -2.4950000e-02
  -1.6150000e-02
   3.2020000e-02
   5.3250000e-02
   9.5280000e-02
   1.2327000e-01
   7.1750000e-02
  -2.3830000e-02
   3.3700000e-02
   3.6770000e-02
  -7.1180000e-02
   1.5300000e-02
   9.7250000e-02
   5.5220000e-02
   1.3410000e-02
   2.3280000e-02
  -4.1320000e-02
  -7.2380000e-02
  -1.0589000e-01
  -7.6170000e-02
   9.4000000e-03
  -4.4000000e-04
   3.3120000e-02
   1.0227000e-01
   5.7500000e-02
   4.2550000e-02
   1.6890000e-02
   4.1840000e-02
   5.6430000e-02
   4.2060000e-02
   1.8100000e-02
  -1.6830000e-02
  -9.0890000e-02
  -1.7696000e-01
  -1.0145000e-01
  -8.6480000e-02
  -5.7520000e-02
   1.0641000e-01
   1.6295000e-01
   1.5083000e-01
   1.5340000e-01
   3.2080000e-02
  -2.1060000e-02
  -4.3680000e-02
  -6.4710000e-02
  -5.6590000e-02
  -6.6270000e-02
  -4.9600000e-03
   5.1880000e-02
   1.1840000e-02
  -5.7300000e-02
  -4.1700000e-03
   8.6600000e-03
   1.9080000e-02
   4.5270000e-02
   6.1060000e-02
   6.9370000e-02
   4.9100000e-03
  -8.9700000e-03
  -2.0450000e-02
  -5.8620000e-02
  -4.8390000e-02
   1.8450000e-02
   5.5300000e-02
   1.5740000e-02
   1.1209000e-01
   9.1800000e-02
  -3.7290000e-02
  -2.9560000e-02
  -1.0780000e-02
  -2.1500000e-02
  -9.4920000e-02
  -9.1990000e-02
   4.1680000e-02
   6.0540000e-02
   3.8030000e-02
   2.8460000e-02
   6.8850000e-02
   1.1000000e-01
  -9.9300000e-03
   2.0370000e-02
   1.0441000e-01
   3.3700000e-02
  -7.9130000e-02
  -5.1880000e-02
  -6.5300000e-03
  -6.3610000e-02
  -7.5400000e-03
   4.0770000e-02
   2.3000000e-02
   7.4500000e-02
  -9.7600000e-03
  -4.3290000e-02
  -5.6870000e-02
  -3.5070000e-02
   7.7600000e-03
  -2.9720000e-02
   7.3040000e-02
   1.3890000e-01
   1.1746000e-01
   4.0800000e-02
   5.1300000e-03
  -1.0060000e-02
  -1.1444000e-01
  -1.6569000e-01
  -1.4619000e-01
  -1.4005000e-01
  -4.5490000e-02
   3.9840000e-02
   1.0965000e-01
   2.1880000e-01
   2.2102000e-01
   1.2653000e-01
   8.6560000e-02
   7.1340000e-02
  -1.5440000e-02
  -1.0696000e-01
  -1.1639000e-01
  -1.2338000e-01
  -1.3158000e-01
  -9.8350000e-02
  -4.8450000e-02
   1.8230000e-02
   9.7530000e-02
   1.2319000e-01
   1.2239000e-01
   1.5376000e-01
   6.8240000e-02
  -1.3930000e-02
  -6.3470000e-02
  -5.8890000e-02
  -8.8750000e-02
  -1.5083000e-01
  -4.0740000e-02
  -1.2060000e-02
   1.2780000e-02
   4.7820000e-02
   9.7750000e-02
   6.1750000e-02
   7.9320000e-02
   9.0430000e-02
   2.0120000e-02
   4.4690000e-02
   8.8340000e-02
  -1.6670000e-02
  -1.1255000e-01
  -8.7160000e-02
  -9.2430000e-02
  -9.6730000e-02
  -2.9970000e-02
   2.3580000e-02
   9.3990000e-02
   2.1460000e-01
   9.5800000e-02
   6.1140000e-02
   6.4760000e-02
  -2.1440000e-02
  -5.2400000e-02
  -3.5260000e-02
  -2.2890000e-02
  -2.0620000e-02
  -1.2370000e-02
  -1.9690000e-02
  -1.5220000e-02
  -1.4720000e-02
   3.2630000e-02
   3.7320000e-02
  -2.4020000e-02
   4.9600000e-03
   5.5170000e-02
   1.1200000e-03
   1.6000000e-04
  -2.3300000e-03
  -3.4350000e-02
   1.0455000e-01
   5.5690000e-02
  -2.8320000e-02
   1.0482000e-01
   1.1483000e-01
  -1.0670000e-02
  -6.5300000e-03
   9.4900000e-03
  -1.2368000e-01
  -1.0515000e-01
  -7.6140000e-02
  -1.4326000e-01
  -1.8970000e-02
   3.0320000e-02
   4.9570000e-02
   1.1894000e-01
   1.3641000e-01
   9.9660000e-02
   4.9270000e-02
   1.8010000e-02
  -1.3000000e-02
  -2.9260000e-02
  -7.5560000e-02
  -9.1000000e-03
   1.5630000e-02
  -1.0912000e-01
  -9.7530000e-02
  -5.7110000e-02
  -2.1580000e-02
   3.6000000e-02
  -1.4000000e-03
   9.9390000e-02
   1.9409000e-01
   1.0019000e-01
   4.3240000e-02
   6.6190000e-02
   9.1900000e-03
  -7.4820000e-02
  -7.0710000e-02
  -1.2961000e-01
  -6.7670000e-02
  -3.0490000e-02
  -8.7000000e-02
  -4.3900000e-02
   1.5050000e-02
   5.5550000e-02
   7.1840000e-02
   2.9390000e-02
   6.7340000e-02
   1.6835000e-01
   9.0480000e-02
  -1.6670000e-02
   7.3100000e-02
   6.1420000e-02
  -6.0160000e-02
  -1.4087000e-01
  -1.2152000e-01
  -7.3370000e-02
  -1.0309000e-01
  -1.1280000e-01
   2.1400000e-03
   1.6374000e-01
   1.8559000e-01
   1.6810000e-01
   1.8441000e-01
   1.7496000e-01
   6.2710000e-02
  -2.4270000e-02
  -3.7840000e-02
  -6.0680000e-02
  -1.6423000e-01
  -1.4562000e-01
  -7.0770000e-02
  -7.8830000e-02
  -6.8760000e-02
  -2.5830000e-02
   4.5840000e-02
   1.3525000e-01
   1.5269000e-01
   1.4529000e-01
   1.2168000e-01
   1.2393000e-01
   2.9690000e-02
  -9.0590000e-02
  -8.0140000e-02
  -1.1080000e-01
  -1.4715000e-01
  -1.5006000e-01
  -7.8640000e-02
  -3.5970000e-02
  -3.6500000e-03
   8.1980000e-02
   1.5634000e-01
   1.3531000e-01
   1.2958000e-01
   4.9270000e-02
   3.4600000e-02
   2.0760000e-02
  -9.0010000e-02
  -1.3298000e-01
  -6.7280000e-02
  -1.1562000e-01
  -1.6939000e-01
  -1.3190000e-02
   7.8140000e-02
   7.6060000e-02
   8.6890000e-02
   1.1965000e-01
   1.2371000e-01
   1.2207000e-01
   6.1610000e-02
   1.8480000e-02
   1.5600000e-03
  -6.4050000e-02
  -1.7416000e-01
  -1.4400000e-01
  -7.4880000e-02
  -1.1156000e-01
  -6.6570000e-02
   9.8680000e-02
   1.4351000e-01
   1.0795000e-01
   1.4471000e-01
   1.6234000e-01
   8.3490000e-02
   2.8710000e-02
   8.0000000e-04
  -2.3550000e-02
   6.7200000e-03
  -7.0500000e-03
  -1.1719000e-01
  -1.1321000e-01
  -4.0630000e-02
  -1.0583000e-01
  -1.0575000e-01
   4.3210000e-02
   1.1359000e-01
   1.8250000e-01
   2.3859000e-01
   1.2686000e-01
   8.7160000e-02
   4.4500000e-02
  -7.1400000e-02
  -1.3780000e-01
  -1.2368000e-01
  -7.1150000e-02
  -9.4700000e-02
  -5.3770000e-02
  -1.1630000e-02
   7.2550000e-02
   3.3180000e-02
  -5.2970000e-02
   3.8170000e-02
   5.0420000e-02
   2.8130000e-02
   3.4930000e-02
   1.6180000e-02
   5.2480000e-02
   2.7060000e-02
  -5.7990000e-02
  -3.6050000e-02
  -3.2400000e-03
  -8.1600000e-02
  -6.0700000e-02
   2.7140000e-02
  -3.8000000e-02
   4.0880000e-02
   7.6990000e-02
   1.3900000e-02
   2.4460000e-02
   5.2620000e-02
   9.9800000e-03
   1.0360000e-02
   2.3250000e-02
  -4.6300000e-03
   9.1600000e-03
   3.3090000e-02
  -3.6250000e-02
  -1.9470000e-02
   5.9770000e-02
  -4.8060000e-02
  -5.9140000e-02
   2.5550000e-02
   8.0310000e-02
   4.3840000e-02
   4.2940000e-02
   1.2640000e-01
   6.7700000e-02
  -4.4690000e-02
  -6.5750000e-02
  -3.6300000e-02
  -6.0050000e-02
  -4.2140000e-02
  -1.1570000e-02
   4.0190000e-02
   4.5840000e-02
  -2.0120000e-02
   3.3530000e-02
   5.6970000e-02
   8.0000000e-04
   2.4320000e-02
   4.0690000e-02
   3.0190000e-02
   4.9790000e-02
