# Supplementary material for: A Novel Classification Method for Flutter Signals Based on the CNN and STFT
Source: Hindawi journal article supplement (doi:10.1155/2019/9375437), 2019-04-09
Supplement: f1 [file 9375437.f1.zip › 01_9_z29.5_3channel.txt]

   1.3000000e-04
   1.4000000e-04
   1.3000000e-04
   1.1000000e-04
   1.2000000e-04
   1.2000000e-04
   1.1000000e-04
   1.1000000e-04
   1.2000000e-04
   1.1000000e-04
   1.0000000e-04
   1.0000000e-04
   9.0000000e-05
   9.0000000e-05
   9.0000000e-05
   8.0000000e-05
   8.0000000e-05
   9.0000000e-05
   8.0000000e-05
   9.0000000e-05
   9.0000000e-05
   9.0000000e-05
   9.0000000e-05
   8.0000000e-05
   1.0000000e-04
   1.0000000e-04
   9.0000000e-05
   1.0000000e-04
   1.0000000e-04
   1.0000000e-04
   1.0000000e-04
   1.0000000e-04
   1.0000000e-04
   1.0000000e-04
   1.0000000e-04
   1.1000000e-04
   1.1000000e-04
   1.0000000e-04
   1.1000000e-04
   1.0000000e-04
   9.0000000e-05
   1.0000000e-04
   1.0000000e-04
   1.0000000e-04
   1.0000000e-04
   1.1000000e-04
   1.1000000e-04
   1.0000000e-04
   1.1000000e-04
   1.0000000e-04
   1.0000000e-04
   1.1000000e-04
   1.1000000e-04
   1.1000000e-04
   1.2000000e-04
   1.1000000e-04
   1.2000000e-04
   1.2000000e-04
   1.1000000e-04
   1.2000000e-04
   1.2000000e-04
   1.2000000e-04
   1.2000000e-04
   1.2000000e-04
   1.1000000e-04
   1.1000000e-04
   1.1000000e-04
   1.0000000e-04
   9.0000000e-05
   1.0000000e-04
   1.0000000e-04
   8.0000000e-05
   8.0000000e-05
   8.0000000e-05
   7.0000000e-05
   7.0000000e-05
   8.0000000e-05
   9.0000000e-05
   8.0000000e-05
   8.0000000e-05
   9.0000000e-05
   9.0000000e-05
   9.0000000e-05
   1.0000000e-04
   1.0000000e-04
   1.0000000e-04
   1.2000000e-04
   1.1000000e-04
   1.1000000e-04
   1.4000000e-04
   1.3000000e-04
   1.3000000e-04
   1.4000000e-04
   1.4000000e-04
   1.4000000e-04
   1.5000000e-04
   1.5000000e-04
   1.4000000e-04
   1.5000000e-04
   1.5000000e-04
   1.4000000e-04
   1.4000000e-04
   1.4000000e-04
   1.3000000e-04
   1.2000000e-04
   1.2000000e-04
   1.1000000e-04
   1.1000000e-04
   1.1000000e-04
   1.0000000e-04
   1.0000000e-04
   9.0000000e-05
   9.0000000e-05
   9.0000000e-05
   9.0000000e-05
   9.0000000e-05
   8.0000000e-05
   9.0000000e-05
   9.0000000e-05
   8.0000000e-05
   9.0000000e-05
   1.0000000e-04
   1.0000000e-04
   1.1000000e-04
   1.1000000e-04
   1.1000000e-04
   1.1000000e-04
   1.1000000e-04
   1.1000000e-04
   1.2000000e-04
   1.2000000e-04
   1.1000000e-04
   1.1000000e-04
   1.1000000e-04
   1.2000000e-04
   1.1000000e-04
   1.0000000e-04
   1.1000000e-04
   1.1000000e-04
   1.1000000e-04
   1.2000000e-04
   1.1000000e-04
   1.1000000e-04
   1.2000000e-04
   1.1000000e-04
   9.0000000e-05
   1.2000000e-04
   1.1000000e-04
   1.1000000e-04
   1.1000000e-04
   1.1000000e-04
   1.1000000e-04
   1.0000000e-04
   1.1000000e-04
   1.1000000e-04
   1.1000000e-04
   1.0000000e-04
   1.1000000e-04
   1.1000000e-04
   1.0000000e-04
   1.0000000e-04
   1.1000000e-04
   1.0000000e-04
   1.0000000e-04
   1.0000000e-04
   1.0000000e-04
   1.0000000e-04
   9.0000000e-05
   9.0000000e-05
   9.0000000e-05
   8.0000000e-05
   9.0000000e-05
   8.0000000e-05
   8.0000000e-05
   8.0000000e-05
   9.0000000e-05
   9.0000000e-05
   8.0000000e-05
   9.0000000e-05
   9.0000000e-05
   9.0000000e-05
   9.0000000e-05
   1.0000000e-04
   1.1000000e-04
   1.1000000e-04
   1.2000000e-04
   1.2000000e-04
   1.2000000e-04
   1.3000000e-04
   1.4000000e-04
   1.4000000e-04
   1.4000000e-04
   1.3000000e-04
   1.3000000e-04
   1.2000000e-04
   1.1000000e-04
   1.2000000e-04
   1.2000000e-04
   1.1000000e-04
   1.1000000e-04
   1.0000000e-04
   1.0000000e-04
   1.0000000e-04
   8.0000000e-05
   8.0000000e-05
   8.0000000e-05
   7.0000000e-05
   7.0000000e-05
   7.0000000e-05
   7.0000000e-05
   6.0000000e-05
   7.0000000e-05
   8.0000000e-05
   8.0000000e-05
   8.0000000e-05
   8.0000000e-05
   8.0000000e-05
   9.0000000e-05
   9.0000000e-05
   9.0000000e-05
   1.0000000e-04
   1.1000000e-04
   1.1000000e-04
   1.2000000e-04
   1.2000000e-04
   1.2000000e-04
   1.3000000e-04
   1.3000000e-04
   1.4000000e-04
   1.4000000e-04
   1.4000000e-04
   1.4000000e-04
   1.4000000e-04
   1.3000000e-04
   1.2000000e-04
   1.3000000e-04
   1.2000000e-04
   1.2000000e-04
   1.2000000e-04
   1.2000000e-04
   1.1000000e-04
   1.1000000e-04
   1.2000000e-04
   1.1000000e-04
   1.1000000e-04
   1.1000000e-04
   1.0000000e-04
   1.0000000e-04
   1.0000000e-04
   1.0000000e-04
   1.0000000e-04
   9.0000000e-05
   1.1000000e-04
   1.1000000e-04
   1.0000000e-04
   1.0000000e-04
   1.0000000e-04
   1.0000000e-04
   1.0000000e-04
   9.0000000e-05
   1.0000000e-04
   9.0000000e-05
   8.0000000e-05
   1.0000000e-04
   9.0000000e-05
   1.0000000e-04
   1.1000000e-04
   1.1000000e-04
   1.1000000e-04
   1.1000000e-04
   1.2000000e-04
   1.1000000e-04
   1.1000000e-04
   1.2000000e-04
   1.1000000e-04
   1.1000000e-04
   1.2000000e-04
   1.2000000e-04
   1.2000000e-04
   1.2000000e-04
   1.2000000e-04
   1.3000000e-04
   1.2000000e-04
   1.2000000e-04
   1.2000000e-04
   1.1000000e-04
   1.0000000e-04
   1.1000000e-04
   1.1000000e-04
   9.0000000e-05
   1.0000000e-04
   1.0000000e-04
   1.0000000e-04
   8.0000000e-05
   8.0000000e-05
   1.0000000e-04
   8.0000000e-05
   8.0000000e-05
   8.0000000e-05
   6.0000000e-05
   7.0000000e-05
   7.0000000e-05
   7.0000000e-05
   8.0000000e-05
   8.0000000e-05
   9.0000000e-05
   1.0000000e-04
   9.0000000e-05
   1.1000000e-04
   1.1000000e-04
   1.0000000e-04
   1.2000000e-04
   1.2000000e-04
   1.2000000e-04
   1.3000000e-04
   1.3000000e-04
   1.4000000e-04
   1.4000000e-04
   1.5000000e-04
   1.4000000e-04
   1.4000000e-04
   1.3000000e-04
   1.4000000e-04
   1.4000000e-04
   1.3000000e-04
   1.3000000e-04
   1.3000000e-04
   1.3000000e-04
   1.2000000e-04
   1.3000000e-04
   1.2000000e-04
   1.2000000e-04
   1.2000000e-04
   1.1000000e-04
   1.1000000e-04
   1.1000000e-04
   1.0000000e-04
   1.0000000e-04
   1.0000000e-04
   1.0000000e-04
   9.0000000e-05
   8.0000000e-05
   8.0000000e-05
   8.0000000e-05
   7.0000000e-05
   8.0000000e-05
   9.0000000e-05
   7.0000000e-05
   8.0000000e-05
   9.0000000e-05
   8.0000000e-05
   9.0000000e-05
   9.0000000e-05
   9.0000000e-05
   9.0000000e-05
   9.0000000e-05
   9.0000000e-05
   9.0000000e-05
   1.0000000e-04
   1.1000000e-04
   1.0000000e-04
   1.0000000e-04
   1.2000000e-04
   1.2000000e-04
   1.0000000e-04
   1.1000000e-04
   1.2000000e-04
   1.1000000e-04
   1.1000000e-04
   1.2000000e-04
   1.1000000e-04
   1.2000000e-04
   1.2000000e-04
   1.1000000e-04
   1.1000000e-04
   1.2000000e-04
   1.1000000e-04
   9.0000000e-05
   1.0000000e-04
   9.0000000e-05
   8.0000000e-05
   9.0000000e-05
   9.0000000e-05
   6.0000000e-05
   7.0000000e-05
   9.0000000e-05
   8.0000000e-05
   8.0000000e-05
   8.0000000e-05
   7.0000000e-05
   7.0000000e-05
   8.0000000e-05
   8.0000000e-05
   8.0000000e-05
   8.0000000e-05
   9.0000000e-05
   1.0000000e-04
   1.0000000e-04
   1.1000000e-04
   1.1000000e-04
   1.1000000e-04
   1.1000000e-04
   1.1000000e-04
   1.2000000e-04
   1.2000000e-04
   1.2000000e-04
   1.2000000e-04
   1.3000000e-04
   1.4000000e-04
   1.4000000e-04
   1.4000000e-04
   1.4000000e-04
   1.3000000e-04
   1.4000000e-04
   1.4000000e-04
   1.3000000e-04
   1.1000000e-04
   1.1000000e-04
   1.1000000e-04
   1.0000000e-04
   1.0000000e-04
   9.0000000e-05
   9.0000000e-05
   8.0000000e-05
   9.0000000e-05
   9.0000000e-05
   8.0000000e-05
   7.0000000e-05
   7.0000000e-05
   8.0000000e-05
   6.0000000e-05
   7.0000000e-05
   8.0000000e-05
   7.0000000e-05
   8.0000000e-05
   9.0000000e-05
   8.0000000e-05
   9.0000000e-05
   9.0000000e-05
   1.0000000e-04
   1.0000000e-04
   9.0000000e-05
   9.0000000e-05
   1.0000000e-04
   1.0000000e-04
   1.0000000e-04
   1.1000000e-04
   1.1000000e-04
   1.0000000e-04
   1.2000000e-04
   1.2000000e-04
   1.3000000e-04
   1.3000000e-04
   1.2000000e-04
   1.3000000e-04
   1.3000000e-04
   1.2000000e-04
   1.3000000e-04
   1.2000000e-04
   1.2000000e-04
   1.3000000e-04
   1.1000000e-04
   1.2000000e-04
   1.3000000e-04
   1.1000000e-04
   1.1000000e-04
   1.1000000e-04
   1.0000000e-04
   1.1000000e-04
   1.0000000e-04
   1.0000000e-04
   1.0000000e-04
   9.0000000e-05
   9.0000000e-05
   1.0000000e-04
   1.0000000e-04
   9.0000000e-05
   9.0000000e-05
   9.0000000e-05
   8.0000000e-05
   9.0000000e-05
   8.0000000e-05
   8.0000000e-05
   9.0000000e-05
   8.0000000e-05
   7.0000000e-05
   8.0000000e-05
   8.0000000e-05
   8.0000000e-05
   9.0000000e-05
   9.0000000e-05
   9.0000000e-05
   1.0000000e-04
   1.0000000e-04
   1.0000000e-04
   1.1000000e-04
   1.1000000e-04
   1.1000000e-04
   1.0000000e-04
   1.1000000e-04
   1.1000000e-04
   1.1000000e-04
   1.0000000e-04
   1.2000000e-04
   1.2000000e-04
   1.2000000e-04
   1.2000000e-04
   1.2000000e-04
   1.2000000e-04
   1.1000000e-04
   1.0000000e-04
   1.1000000e-04
   1.1000000e-04
   1.0000000e-04
   1.1000000e-04
   1.0000000e-04
   1.0000000e-04
   1.0000000e-04
   1.0000000e-04
   1.0000000e-04
   1.0000000e-04
   9.0000000e-05
   9.0000000e-05
   8.0000000e-05
   8.0000000e-05
   8.0000000e-05
   8.0000000e-05
   8.0000000e-05
   9.0000000e-05
   8.0000000e-05
   9.0000000e-05
   1.1000000e-04
   1.0000000e-04
   9.0000000e-05
   1.1000000e-04
   1.1000000e-04
   1.1000000e-04
   1.2000000e-04
   1.2000000e-04
   1.2000000e-04
   1.3000000e-04
   1.3000000e-04
   1.3000000e-04
   1.3000000e-04
   1.4000000e-04
   1.5000000e-04
   1.4000000e-04
   1.5000000e-04
   1.4000000e-04
   1.2000000e-04
   1.3000000e-04
   1.3000000e-04
   1.2000000e-04
   1.2000000e-04
   1.1000000e-04
   1.1000000e-04
   1.1000000e-04
   9.0000000e-05
   1.0000000e-04
   1.0000000e-04
   8.0000000e-05
   8.0000000e-05
   7.0000000e-05
   5.0000000e-05
   5.0000000e-05
   6.0000000e-05
   3.0000000e-05
   4.0000000e-05
   5.0000000e-05
   5.0000000e-05
   4.0000000e-05
   5.0000000e-05
   7.0000000e-05
   7.0000000e-05
   6.0000000e-05
   7.0000000e-05
   9.0000000e-05
   8.0000000e-05
   9.0000000e-05
   1.0000000e-04
   1.1000000e-04
   1.1000000e-04
   1.2000000e-04
   1.3000000e-04
   1.4000000e-04
   1.3000000e-04
   1.4000000e-04
   1.4000000e-04
   1.5000000e-04
   1.5000000e-04
   1.3000000e-04
   1.4000000e-04
   1.3000000e-04
   1.3000000e-04
   1.4000000e-04
   1.3000000e-04
   1.3000000e-04
   1.2000000e-04
   1.1000000e-04
   1.2000000e-04
   1.1000000e-04
   1.0000000e-04
   1.0000000e-04
   9.0000000e-05
   9.0000000e-05
   9.0000000e-05
   9.0000000e-05
   9.0000000e-05
   9.0000000e-05
   9.0000000e-05
   1.0000000e-04
   1.0000000e-04
   9.0000000e-05
   1.1000000e-04
   1.1000000e-04
   1.1000000e-04
   1.1000000e-04
   1.1000000e-04
   1.2000000e-04
   1.2000000e-04
   1.1000000e-04
   1.3000000e-04
   1.3000000e-04
   1.2000000e-04
   1.3000000e-04
   1.2000000e-04
   1.2000000e-04
   1.1000000e-04
   1.2000000e-04
   1.1000000e-04
   1.1000000e-04
   1.2000000e-04
   1.1000000e-04
   1.0000000e-04
   1.0000000e-04
   1.1000000e-04
   1.0000000e-04
   1.0000000e-04
   1.0000000e-04
   9.0000000e-05
   9.0000000e-05
   9.0000000e-05
   1.0000000e-04
   9.0000000e-05
   8.0000000e-05
   9.0000000e-05
   9.0000000e-05
   8.0000000e-05
   8.0000000e-05
   9.0000000e-05
   9.0000000e-05
   9.0000000e-05
   9.0000000e-05
   1.0000000e-04
   9.0000000e-05
   8.0000000e-05
   9.0000000e-05
   1.0000000e-04
   9.0000000e-05
   9.0000000e-05
   9.0000000e-05
   9.0000000e-05
   9.0000000e-05
   9.0000000e-05
   9.0000000e-05
   1.0000000e-04
   1.0000000e-04
   9.0000000e-05
   9.0000000e-05
   1.0000000e-04
   1.1000000e-04
   1.1000000e-04
   1.0000000e-04
   1.1000000e-04
   1.2000000e-04
   1.2000000e-04
   1.2000000e-04
   1.2000000e-04
   1.3000000e-04
   1.3000000e-04
   1.3000000e-04
   1.4000000e-04
   1.4000000e-04
   1.3000000e-04
   1.4000000e-04
   1.5000000e-04
   1.3000000e-04
   1.3000000e-04
   1.4000000e-04
   1.3000000e-04
   1.2000000e-04
   1.2000000e-04
   1.1000000e-04
   1.1000000e-04
   1.0000000e-04
   1.1000000e-04
   1.1000000e-04
   1.0000000e-04
   8.0000000e-05
   8.0000000e-05
   8.0000000e-05
   6.0000000e-05
   5.0000000e-05
   6.0000000e-05
   6.0000000e-05
   6.0000000e-05
   6.0000000e-05
   5.0000000e-05
   5.0000000e-05
   6.0000000e-05
   6.0000000e-05
   7.0000000e-05
   8.0000000e-05
   8.0000000e-05
   8.0000000e-05
   8.0000000e-05
   1.0000000e-04
   1.0000000e-04
   1.1000000e-04
   1.1000000e-04
   1.2000000e-04
   1.4000000e-04
   1.4000000e-04
   1.5000000e-04
   1.5000000e-04
   1.4000000e-04
   1.5000000e-04
   1.5000000e-04
   1.4000000e-04
   1.4000000e-04
   1.3000000e-04
   1.3000000e-04
   1.2000000e-04
   1.2000000e-04
   1.2000000e-04
   1.2000000e-04
   1.2000000e-04
   1.0000000e-04
   1.0000000e-04
   9.0000000e-05
   7.0000000e-05
   8.0000000e-05
   8.0000000e-05
   5.0000000e-05
   7.0000000e-05
   7.0000000e-05
   5.0000000e-05
   6.0000000e-05
   6.0000000e-05
   6.0000000e-05
   7.0000000e-05
   8.0000000e-05
   8.0000000e-05
   8.0000000e-05
   9.0000000e-05
   1.0000000e-04
   1.1000000e-04
   1.1000000e-04
   1.1000000e-04
   1.1000000e-04
   1.3000000e-04
   1.2000000e-04
   1.3000000e-04
   1.4000000e-04
   1.3000000e-04
   1.4000000e-04
   1.4000000e-04
   1.4000000e-04
   1.4000000e-04
   1.5000000e-04
   1.3000000e-04
   1.3000000e-04
   1.2000000e-04
   1.2000000e-04
   1.2000000e-04
   1.1000000e-04
   1.1000000e-04
   1.0000000e-04
   1.0000000e-04
   1.0000000e-04
   1.0000000e-04
   1.0000000e-04
   1.1000000e-04
   1.0000000e-04
   8.0000000e-05
   1.0000000e-04
   1.0000000e-04
   9.0000000e-05
   9.0000000e-05
   1.0000000e-04
   9.0000000e-05
   1.0000000e-04
   1.1000000e-04
   1.0000000e-04
   1.1000000e-04
   1.1000000e-04
   1.1000000e-04
   1.2000000e-04
   1.2000000e-04
   1.1000000e-04
   1.1000000e-04
   1.1000000e-04
   1.2000000e-04
   1.2000000e-04
   1.1000000e-04
   1.2000000e-04
   1.2000000e-04
   1.2000000e-04
   1.2000000e-04
   1.1000000e-04
   1.2000000e-04
   1.2000000e-04
   1.2000000e-04
   1.2000000e-04
   1.2000000e-04
   1.2000000e-04
   1.2000000e-04
   1.2000000e-04
   1.2000000e-04
   1.3000000e-04
   1.3000000e-04
   1.3000000e-04
   1.3000000e-04
   1.2000000e-04
   1.2000000e-04
   1.2000000e-04
   1.2000000e-04
   1.2000000e-04
   1.1000000e-04
   1.1000000e-04
   1.0000000e-04
   1.0000000e-04
   1.0000000e-04
   9.0000000e-05
   9.0000000e-05
   9.0000000e-05
   8.0000000e-05
   8.0000000e-05
   8.0000000e-05
   7.0000000e-05
   6.0000000e-05
   6.0000000e-05
   7.0000000e-05
   6.0000000e-05
   7.0000000e-05
   6.0000000e-05
   7.0000000e-05
   8.0000000e-05
   8.0000000e-05
   9.0000000e-05
   9.0000000e-05
   9.0000000e-05
   1.0000000e-04
   1.0000000e-04
   1.0000000e-04
   1.1000000e-04
   1.2000000e-04
   1.2000000e-04
   1.3000000e-04
   1.3000000e-04
   1.4000000e-04
   1.4000000e-04
   1.3000000e-04
   1.5000000e-04
   1.4000000e-04
   1.2000000e-04
   1.3000000e-04
   1.4000000e-04
   1.2000000e-04
   1.2000000e-04
   1.2000000e-04
   1.1000000e-04
   1.1000000e-04
   1.1000000e-04
   1.1000000e-04
   1.0000000e-04
   1.0000000e-04
   1.0000000e-04
   8.0000000e-05
   8.0000000e-05
   9.0000000e-05
   8.0000000e-05
   8.0000000e-05
   8.0000000e-05
   9.0000000e-05
   9.0000000e-05
   9.0000000e-05
   9.0000000e-05
   1.0000000e-04
   9.0000000e-05
   1.0000000e-04
   1.1000000e-04
   1.0000000e-04
   1.1000000e-04
   1.1000000e-04
   1.2000000e-04
   1.2000000e-04
   1.2000000e-04
   1.3000000e-04
   1.4000000e-04
   1.4000000e-04
   1.4000000e-04
   1.5000000e-04
   1.4000000e-04
   1.4000000e-04
   1.4000000e-04
   1.4000000e-04
   1.3000000e-04
   1.3000000e-04
   1.3000000e-04
   1.2000000e-04
   1.1000000e-04
   1.1000000e-04
   1.0000000e-04
   1.0000000e-04
   1.0000000e-04
   9.0000000e-05
   8.0000000e-05
   8.0000000e-05
   8.0000000e-05
   8.0000000e-05
   8.0000000e-05
   7.0000000e-05
   7.0000000e-05
   7.0000000e-05
   8.0000000e-05
   7.0000000e-05
   6.0000000e-05
   9.0000000e-05
   8.0000000e-05
   8.0000000e-05
   9.0000000e-05
   8.0000000e-05
   9.0000000e-05
   9.0000000e-05
   1.0000000e-04
   9.0000000e-05
   9.0000000e-05
   1.0000000e-04
   1.0000000e-04
   1.0000000e-04
   1.1000000e-04
   1.1000000e-04
   1.1000000e-04
   1.3000000e-04
   1.3000000e-04
   1.2000000e-04
   1.3000000e-04
   1.2000000e-04
   1.3000000e-04
   1.2000000e-04
   1.2000000e-04
   1.1000000e-04
   1.1000000e-04
   1.2000000e-04
   1.2000000e-04
   1.1000000e-04
   1.2000000e-04
   1.1000000e-04
   1.0000000e-04
   1.1000000e-04
   1.1000000e-04
   1.0000000e-04
   1.0000000e-04
   8.0000000e-05
   8.0000000e-05
   8.0000000e-05
   8.0000000e-05
   8.0000000e-05
   8.0000000e-05
   7.0000000e-05
   8.0000000e-05
   8.0000000e-05
   7.0000000e-05
   8.0000000e-05
   8.0000000e-05
   8.0000000e-05
   7.0000000e-05
   8.0000000e-05
   8.0000000e-05
   9.0000000e-05
   1.0000000e-04
   1.0000000e-04
   1.0000000e-04
   1.1000000e-04
   1.1000000e-04
   1.2000000e-04
   1.3000000e-04
   1.2000000e-04
   1.2000000e-04
   1.3000000e-04
   1.3000000e-04
   1.2000000e-04
   1.2000000e-04
   1.2000000e-04
   1.2000000e-04
   1.2000000e-04
   1.2000000e-04
   1.2000000e-04
   1.2000000e-04
   1.1000000e-04
   1.0000000e-04
   1.1000000e-04
   1.0000000e-04
   9.0000000e-05
   9.0000000e-05
   9.0000000e-05
   8.0000000e-05
   8.0000000e-05
   7.0000000e-05
   9.0000000e-05
   8.0000000e-05
   7.0000000e-05
   8.0000000e-05
   8.0000000e-05
   7.0000000e-05
   8.0000000e-05
   9.0000000e-05
   9.0000000e-05
   8.0000000e-05
   8.0000000e-05
   9.0000000e-05
   1.0000000e-04
   1.0000000e-04
   1.1000000e-04
   1.1000000e-04
   1.0000000e-04
   1.2000000e-04
   1.2000000e-04
   1.2000000e-04
   1.3000000e-04
   1.3000000e-04
   1.3000000e-04
   1.3000000e-04
   1.3000000e-04
   1.3000000e-04
   1.3000000e-04
   1.2000000e-04
   1.4000000e-04
   1.3000000e-04
   1.2000000e-04
   1.3000000e-04
   1.2000000e-04
   1.1000000e-04
   1.1000000e-04
   1.1000000e-04
   1.0000000e-04
   1.1000000e-04
   1.1000000e-04
   1.0000000e-04
   1.0000000e-04
   1.1000000e-04
   9.0000000e-05
   9.0000000e-05
   1.0000000e-04
   1.0000000e-04
   9.0000000e-05
   9.0000000e-05
   9.0000000e-05
   9.0000000e-05
   9.0000000e-05
   9.0000000e-05
   9.0000000e-05
   8.0000000e-05
   9.0000000e-05
   9.0000000e-05
   9.0000000e-05
   1.0000000e-04
   9.0000000e-05
   1.0000000e-04
   1.0000000e-04
   1.0000000e-04
   1.0000000e-04
   1.1000000e-04
   1.2000000e-04
   1.0000000e-04
   1.1000000e-04
   1.1000000e-04
   1.0000000e-04
   1.1000000e-04
   1.2000000e-04
   1.2000000e-04
   1.2000000e-04
   1.2000000e-04
   1.1000000e-04
   1.1000000e-04
   1.2000000e-04
   1.2000000e-04
   1.1000000e-04
   1.1000000e-04
   1.2000000e-04
   1.2000000e-04
   1.1000000e-04
   1.0000000e-04
   1.1000000e-04
   1.1000000e-04
   1.0000000e-04
   1.0000000e-04
   9.0000000e-05
   7.0000000e-05
   8.0000000e-05
   8.0000000e-05
   7.0000000e-05
   8.0000000e-05
   8.0000000e-05
   6.0000000e-05
   7.0000000e-05
   7.0000000e-05
   7.0000000e-05
   7.0000000e-05
   7.0000000e-05
   6.0000000e-05
   7.0000000e-05
   8.0000000e-05
   7.0000000e-05
   8.0000000e-05
   9.0000000e-05
   8.0000000e-05
   1.0000000e-04
   1.0000000e-04
   1.1000000e-04
   1.2000000e-04
   1.1000000e-04
   1.2000000e-04
   1.2000000e-04
   1.3000000e-04
   1.4000000e-04
   1.3000000e-04
   1.4000000e-04
   1.5000000e-04
   1.4000000e-04
   1.4000000e-04
   1.6000000e-04
   1.5000000e-04
   1.4000000e-04
   1.4000000e-04
   1.4000000e-04
   1.3000000e-04
   1.2000000e-04
   1.1000000e-04
   1.1000000e-04
   1.1000000e-04
   1.0000000e-04
   1.0000000e-04
   1.0000000e-04
   1.0000000e-04
   8.0000000e-05
   9.0000000e-05
   9.0000000e-05
   8.0000000e-05
   8.0000000e-05
   8.0000000e-05
   8.0000000e-05
   8.0000000e-05
   8.0000000e-05
   9.0000000e-05
   8.0000000e-05
   9.0000000e-05
   9.0000000e-05
   1.0000000e-04
   9.0000000e-05
   1.0000000e-04
   1.1000000e-04
   1.1000000e-04
   1.1000000e-04
   1.3000000e-04
   1.3000000e-04
   1.2000000e-04
   1.2000000e-04
   1.2000000e-04
   1.3000000e-04
   1.3000000e-04
   1.2000000e-04
   1.3000000e-04
   1.2000000e-04
   1.3000000e-04
   1.2000000e-04
   1.1000000e-04
   1.2000000e-04
   1.2000000e-04
   1.1000000e-04
   1.0000000e-04
   1.0000000e-04
   8.0000000e-05
   8.0000000e-05
   9.0000000e-05
   9.0000000e-05
   8.0000000e-05
   7.0000000e-05
   8.0000000e-05
   8.0000000e-05
   7.0000000e-05
   8.0000000e-05
   8.0000000e-05
   7.0000000e-05
   8.0000000e-05
   7.0000000e-05
   7.0000000e-05
   7.0000000e-05
   7.0000000e-05
   7.0000000e-05
   6.0000000e-05
   8.0000000e-05
   8.0000000e-05
   6.0000000e-05
   8.0000000e-05
   9.0000000e-05
   9.0000000e-05
   9.0000000e-05
   1.0000000e-04
   1.0000000e-04
   1.1000000e-04
   1.1000000e-04
   1.2000000e-04
   1.2000000e-04
   1.3000000e-04
   1.4000000e-04
   1.3000000e-04
   1.3000000e-04
   1.4000000e-04
   1.4000000e-04
   1.4000000e-04
   1.5000000e-04
   1.4000000e-04
   1.4000000e-04
   1.5000000e-04
   1.3000000e-04
   1.3000000e-04
   1.3000000e-04
   1.1000000e-04
   1.2000000e-04
   1.1000000e-04
   1.0000000e-04
   1.0000000e-04
   9.0000000e-05
   9.0000000e-05
   9.0000000e-05
   8.0000000e-05
   8.0000000e-05
   7.0000000e-05
   7.0000000e-05
   8.0000000e-05
   6.0000000e-05
   7.0000000e-05
   7.0000000e-05
   7.0000000e-05
   7.0000000e-05
   8.0000000e-05
   9.0000000e-05
   9.0000000e-05
   1.1000000e-04
   1.2000000e-04
   1.1000000e-04
   1.1000000e-04
   1.3000000e-04
   1.3000000e-04
   1.3000000e-04
   1.4000000e-04
   1.4000000e-04
   1.5000000e-04
   1.5000000e-04
   1.5000000e-04
   1.6000000e-04
   1.5000000e-04
   1.4000000e-04
   1.5000000e-04
   1.4000000e-04
   1.3000000e-04
   1.4000000e-04
   1.2000000e-04
   1.2000000e-04
   1.2000000e-04
   1.1000000e-04
   1.1000000e-04
   1.1000000e-04
   1.0000000e-04
   9.0000000e-05
   8.0000000e-05
   9.0000000e-05
   8.0000000e-05
   8.0000000e-05
   7.0000000e-05
   8.0000000e-05
   8.0000000e-05
   7.0000000e-05
   8.0000000e-05
   9.0000000e-05
   9.0000000e-05
   8.0000000e-05
   8.0000000e-05
   8.0000000e-05
   9.0000000e-05
   8.0000000e-05
   9.0000000e-05
   9.0000000e-05
   9.0000000e-05
   1.0000000e-04
   1.0000000e-04
   1.0000000e-04
   1.0000000e-04
   1.1000000e-04
   9.0000000e-05
   1.1000000e-04
   1.1000000e-04
   1.1000000e-04
   1.1000000e-04
   1.1000000e-04
   1.2000000e-04
   1.2000000e-04
   1.2000000e-04
   1.1000000e-04
   1.2000000e-04
   1.1000000e-04
   1.2000000e-04
   1.1000000e-04
   1.1000000e-04
   1.1000000e-04
   1.0000000e-04
   1.0000000e-04
   1.1000000e-04
   1.0000000e-04
   9.0000000e-05
   1.0000000e-04
   9.0000000e-05
   9.0000000e-05
   9.0000000e-05
   8.0000000e-05
   8.0000000e-05
   7.0000000e-05
   7.0000000e-05
   8.0000000e-05
   8.0000000e-05
   8.0000000e-05
   8.0000000e-05
   8.0000000e-05
   8.0000000e-05
   7.0000000e-05
   8.0000000e-05
   8.0000000e-05
   7.0000000e-05
   8.0000000e-05
   9.0000000e-05
   9.0000000e-05
   1.0000000e-04
   1.0000000e-04
   1.1000000e-04
   1.2000000e-04
   1.3000000e-04
   1.2000000e-04
   1.2000000e-04
   1.4000000e-04
   1.3000000e-04
   1.2000000e-04
   1.4000000e-04
   1.4000000e-04
   1.3000000e-04
   1.4000000e-04
   1.4000000e-04
   1.4000000e-04
   1.4000000e-04
   1.3000000e-04
   1.2000000e-04
   1.2000000e-04
   1.2000000e-04
   9.0000000e-05
   1.0000000e-04
   1.0000000e-04
   7.0000000e-05
   8.0000000e-05
   8.0000000e-05
   7.0000000e-05
   8.0000000e-05
   8.0000000e-05
   7.0000000e-05
   7.0000000e-05
   7.0000000e-05
   7.0000000e-05
   7.0000000e-05
   7.0000000e-05
   7.0000000e-05
   6.0000000e-05
   7.0000000e-05
   8.0000000e-05
   8.0000000e-05
   9.0000000e-05
   9.0000000e-05
   1.0000000e-04
   1.1000000e-04
   1.0000000e-04
   1.1000000e-04
   1.1000000e-04
   1.1000000e-04
   1.1000000e-04
   1.2000000e-04
   1.3000000e-04
   1.3000000e-04
   1.4000000e-04
   1.4000000e-04
   1.4000000e-04
   1.3000000e-04
   1.3000000e-04
   1.2000000e-04
   1.2000000e-04
   1.1000000e-04
   1.1000000e-04
   1.0000000e-04
   1.0000000e-04
   1.1000000e-04
   1.0000000e-04
   1.0000000e-04
   1.1000000e-04
   1.0000000e-04
   1.0000000e-04
   8.0000000e-05
   7.0000000e-05
   9.0000000e-05
   9.0000000e-05
   8.0000000e-05
   8.0000000e-05
   8.0000000e-05
   8.0000000e-05
   8.0000000e-05
   9.0000000e-05
   1.0000000e-04
   9.0000000e-05
   8.0000000e-05
   1.0000000e-04
   8.0000000e-05
   9.0000000e-05
   1.1000000e-04
   9.0000000e-05
   1.0000000e-04
   1.1000000e-04
   1.1000000e-04
   1.2000000e-04
   1.2000000e-04
   1.2000000e-04
   1.2000000e-04
   1.3000000e-04
   1.3000000e-04
   1.2000000e-04
   1.2000000e-04
   1.3000000e-04
   1.2000000e-04
   1.2000000e-04
   1.2000000e-04
   1.2000000e-04
   1.3000000e-04
   1.3000000e-04
   1.2000000e-04
   1.2000000e-04
   1.2000000e-04
   1.1000000e-04
   1.1000000e-04
   1.1000000e-04
   1.0000000e-04
   1.0000000e-04
   9.0000000e-05
   9.0000000e-05
   8.0000000e-05
   8.0000000e-05
   9.0000000e-05
   8.0000000e-05
   7.0000000e-05
   7.0000000e-05
   7.0000000e-05
   6.0000000e-05
   6.0000000e-05
   7.0000000e-05
   5.0000000e-05
   5.0000000e-05
   8.0000000e-05
   6.0000000e-05
   6.0000000e-05
   9.0000000e-05
   7.0000000e-05
   8.0000000e-05
   1.0000000e-04
   1.0000000e-04
   1.0000000e-04
   1.2000000e-04
   1.3000000e-04
   1.3000000e-04
   1.3000000e-04
   1.4000000e-04
   1.3000000e-04
   1.4000000e-04
   1.5000000e-04
   1.5000000e-04
   1.5000000e-04
   1.5000000e-04
   1.5000000e-04
   1.5000000e-04
   1.5000000e-04
   1.4000000e-04
   1.3000000e-04
   1.2000000e-04
   1.2000000e-04
   1.1000000e-04
   9.0000000e-05
   1.0000000e-04
   9.0000000e-05
   6.0000000e-05
   8.0000000e-05
   8.0000000e-05
   6.0000000e-05
   6.0000000e-05
   5.0000000e-05
   6.0000000e-05
   5.0000000e-05
   5.0000000e-05
   7.0000000e-05
   6.0000000e-05
   7.0000000e-05
   7.0000000e-05
   7.0000000e-05
   8.0000000e-05
   9.0000000e-05
   1.0000000e-04
   1.0000000e-04
   1.0000000e-04
   1.0000000e-04
   1.1000000e-04
   1.1000000e-04
   1.1000000e-04
   1.2000000e-04
   1.1000000e-04
   1.2000000e-04
   1.2000000e-04
   1.3000000e-04
   1.3000000e-04
   1.3000000e-04
   1.3000000e-04
   1.2000000e-04
   1.2000000e-04
   1.1000000e-04
   1.1000000e-04
   1.0000000e-04
   1.0000000e-04
   1.0000000e-04
   1.0000000e-04
   9.0000000e-05
   1.0000000e-04
   1.0000000e-04
   9.0000000e-05
   9.0000000e-05
   8.0000000e-05
   9.0000000e-05
   8.0000000e-05
   7.0000000e-05
   8.0000000e-05
   9.0000000e-05
   8.0000000e-05
   9.0000000e-05
   1.0000000e-04
   1.0000000e-04
   1.0000000e-04
   1.0000000e-04
   1.0000000e-04
   1.0000000e-04
   9.0000000e-05
   9.0000000e-05
   1.0000000e-04
   9.0000000e-05
   8.0000000e-05
   9.0000000e-05
   9.0000000e-05
   1.0000000e-04
   1.1000000e-04
   1.1000000e-04
   1.2000000e-04
   1.1000000e-04
   1.2000000e-04
   1.2000000e-04
   1.3000000e-04
   1.3000000e-04
   1.3000000e-04
   1.4000000e-04
   1.4000000e-04
   1.4000000e-04
   1.4000000e-04
   1.4000000e-04
   1.4000000e-04
   1.4000000e-04
   1.4000000e-04
   1.4000000e-04
   1.4000000e-04
   1.3000000e-04
   1.2000000e-04
   1.2000000e-04
   1.1000000e-04
   9.0000000e-05
   9.0000000e-05
   9.0000000e-05
   8.0000000e-05
   8.0000000e-05
   8.0000000e-05
   7.0000000e-05
   7.0000000e-05
   6.0000000e-05
   6.0000000e-05
   6.0000000e-05
   6.0000000e-05
   6.0000000e-05
   6.0000000e-05
   5.0000000e-05
   6.0000000e-05
   6.0000000e-05
   6.0000000e-05
   7.0000000e-05
   8.0000000e-05
   9.0000000e-05
   1.1000000e-04
   1.2000000e-04
   1.2000000e-04
   1.1000000e-04
   1.3000000e-04
   1.4000000e-04
   1.3000000e-04
   1.3000000e-04
   1.3000000e-04
   1.4000000e-04
   1.4000000e-04
   1.5000000e-04
   1.5000000e-04
   1.5000000e-04
   1.4000000e-04
   1.5000000e-04
   1.4000000e-04
   1.3000000e-04
   1.3000000e-04
   1.1000000e-04
   1.0000000e-04
   9.0000000e-05
   9.0000000e-05
   9.0000000e-05
   8.0000000e-05
   9.0000000e-05
   8.0000000e-05
   8.0000000e-05
   9.0000000e-05
   8.0000000e-05
   7.0000000e-05
   8.0000000e-05
   7.0000000e-05
   6.0000000e-05
   6.0000000e-05
   5.0000000e-05
   6.0000000e-05
   7.0000000e-05
   7.0000000e-05
   8.0000000e-05
   9.0000000e-05
   1.0000000e-04
   1.0000000e-04
   1.0000000e-04
   1.1000000e-04
   1.0000000e-04
   9.0000000e-05
   1.0000000e-04
   1.1000000e-04
   1.2000000e-04
   1.2000000e-04
   1.3000000e-04
   1.3000000e-04
   1.3000000e-04
   1.3000000e-04
   1.3000000e-04
   1.4000000e-04
   1.3000000e-04
   1.2000000e-04
   1.1000000e-04
   1.1000000e-04
   1.1000000e-04
   1.0000000e-04
   1.0000000e-04
   1.0000000e-04
   1.0000000e-04
   1.0000000e-04
   1.0000000e-04
   9.0000000e-05
   8.0000000e-05
   9.0000000e-05
   7.0000000e-05
   6.0000000e-05
   6.0000000e-05
   6.0000000e-05
   5.0000000e-05
   5.0000000e-05
   6.0000000e-05
   6.0000000e-05
   6.0000000e-05
   7.0000000e-05
   8.0000000e-05
   7.0000000e-05
   7.0000000e-05
   8.0000000e-05
   9.0000000e-05
   9.0000000e-05
   9.0000000e-05
   1.0000000e-04
   1.0000000e-04
   1.0000000e-04
   1.1000000e-04
   1.2000000e-04
   1.3000000e-04
   1.3000000e-04
   1.3000000e-04
   1.4000000e-04
   1.3000000e-04
   1.4000000e-04
   1.4000000e-04
   1.4000000e-04
   1.2000000e-04
   1.2000000e-04
   1.3000000e-04
   1.3000000e-04
   1.2000000e-04
   1.2000000e-04
   1.1000000e-04
   1.1000000e-04
   1.1000000e-04
   1.1000000e-04
   1.0000000e-04
   9.0000000e-05
   8.0000000e-05
   7.0000000e-05
   6.0000000e-05
   6.0000000e-05
   7.0000000e-05
   7.0000000e-05
   7.0000000e-05
   7.0000000e-05
   6.0000000e-05
   7.0000000e-05
   8.0000000e-05
   7.0000000e-05
   8.0000000e-05
   8.0000000e-05
   7.0000000e-05
   8.0000000e-05
   8.0000000e-05
   8.0000000e-05
   9.0000000e-05
   9.0000000e-05
   1.0000000e-04
   1.2000000e-04
   1.1000000e-04
   1.1000000e-04
   1.3000000e-04
   1.1000000e-04
   1.1000000e-04
   1.2000000e-04
   1.2000000e-04
   1.2000000e-04
   1.2000000e-04
   1.2000000e-04
   1.2000000e-04
   1.2000000e-04
   1.4000000e-04
   1.4000000e-04
   1.2000000e-04
   1.3000000e-04
   1.2000000e-04
   1.0000000e-04
   1.2000000e-04
   1.1000000e-04
   1.0000000e-04
   1.0000000e-04
   1.0000000e-04
   1.0000000e-04
   1.1000000e-04
   1.0000000e-04
   1.0000000e-04
   1.0000000e-04
   1.0000000e-04
   9.0000000e-05
   9.0000000e-05
   9.0000000e-05
   7.0000000e-05
   7.0000000e-05
   8.0000000e-05
   6.0000000e-05
   7.0000000e-05
   9.0000000e-05
   8.0000000e-05
   8.0000000e-05
   8.0000000e-05
   8.0000000e-05
   9.0000000e-05
   9.0000000e-05
   9.0000000e-05
   9.0000000e-05
   8.0000000e-05
   1.0000000e-04
   1.0000000e-04
   1.1000000e-04
   1.3000000e-04
   1.4000000e-04
   1.3000000e-04
   1.4000000e-04
   1.6000000e-04
   1.5000000e-04
   1.4000000e-04
   1.5000000e-04
   1.4000000e-04
   1.3000000e-04
   1.3000000e-04
   1.3000000e-04
   1.3000000e-04
   1.3000000e-04
   1.3000000e-04
   1.2000000e-04
   1.1000000e-04
   1.0000000e-04
   1.0000000e-04
   9.0000000e-05
   9.0000000e-05
   8.0000000e-05
   7.0000000e-05
   7.0000000e-05
   7.0000000e-05
   8.0000000e-05
   7.0000000e-05
   8.0000000e-05
   8.0000000e-05
   7.0000000e-05
   7.0000000e-05
   8.0000000e-05
   8.0000000e-05
   7.0000000e-05
   8.0000000e-05
   8.0000000e-05
   9.0000000e-05
   1.1000000e-04
   1.1000000e-04
   1.1000000e-04
   1.3000000e-04
   1.3000000e-04
   1.3000000e-04
   1.4000000e-04
   1.4000000e-04
   1.4000000e-04
   1.5000000e-04
   1.5000000e-04
   1.5000000e-04
   1.5000000e-04
   1.6000000e-04
   1.5000000e-04
   1.5000000e-04
   1.6000000e-04
   1.5000000e-04
   1.4000000e-04
   1.5000000e-04
   1.3000000e-04
   1.2000000e-04
   1.2000000e-04
   1.1000000e-04
   1.1000000e-04
   1.0000000e-04
   9.0000000e-05
   9.0000000e-05
   9.0000000e-05
   9.0000000e-05
   8.0000000e-05
   8.0000000e-05
   6.0000000e-05
   6.0000000e-05
   6.0000000e-05
   5.0000000e-05
   5.0000000e-05
   5.0000000e-05
   6.0000000e-05
   7.0000000e-05
   7.0000000e-05
   9.0000000e-05
   9.0000000e-05
   8.0000000e-05
   1.0000000e-04
   1.0000000e-04
   1.0000000e-04
   1.2000000e-04
   1.2000000e-04
   1.1000000e-04
   1.2000000e-04
   1.3000000e-04
   1.4000000e-04
   1.4000000e-04
   1.6000000e-04
   1.6000000e-04
   1.5000000e-04
   1.6000000e-04
   1.5000000e-04
   1.4000000e-04
   1.4000000e-04
   1.3000000e-04
   1.3000000e-04
   1.3000000e-04
   1.2000000e-04
   1.1000000e-04
   1.1000000e-04
   1.0000000e-04
   1.1000000e-04
   1.1000000e-04
   1.0000000e-04
   9.0000000e-05
   8.0000000e-05
   7.0000000e-05
   5.0000000e-05
   7.0000000e-05
   6.0000000e-05
   5.0000000e-05
   7.0000000e-05
   7.0000000e-05
   6.0000000e-05
   8.0000000e-05
   8.0000000e-05
   8.0000000e-05
   8.0000000e-05
   7.0000000e-05
   8.0000000e-05
   9.0000000e-05
   9.0000000e-05
   1.0000000e-04
   1.0000000e-04
   1.1000000e-04
   1.2000000e-04
   1.1000000e-04
   1.3000000e-04
   1.2000000e-04
   1.1000000e-04
   1.3000000e-04
   1.3000000e-04
   1.2000000e-04
   1.3000000e-04
   1.3000000e-04
   1.2000000e-04
   1.3000000e-04
   1.2000000e-04
   1.3000000e-04
   1.2000000e-04
   1.2000000e-04
   1.0000000e-04
   1.0000000e-04
   1.0000000e-04
   9.0000000e-05
   1.0000000e-04
   9.0000000e-05
   7.0000000e-05
   8.0000000e-05
   8.0000000e-05
   7.0000000e-05
   7.0000000e-05
   8.0000000e-05
   7.0000000e-05
   7.0000000e-05
   7.0000000e-05
   8.0000000e-05
   7.0000000e-05
   7.0000000e-05
   9.0000000e-05
   7.0000000e-05
   7.0000000e-05
   9.0000000e-05
   9.0000000e-05
   9.0000000e-05
   9.0000000e-05
   9.0000000e-05
   1.0000000e-04
   1.0000000e-04
   9.0000000e-05
   1.1000000e-04
   1.0000000e-04
   9.0000000e-05
   1.2000000e-04
   1.1000000e-04
   1.2000000e-04
   1.3000000e-04
   1.3000000e-04
   1.3000000e-04
   1.4000000e-04
   1.4000000e-04
   1.4000000e-04
   1.4000000e-04
   1.5000000e-04
   1.4000000e-04
   1.3000000e-04
   1.4000000e-04
   1.5000000e-04
   1.4000000e-04
   1.4000000e-04
   1.3000000e-04
   1.2000000e-04
   1.1000000e-04
   1.0000000e-04
   9.0000000e-05
   1.1000000e-04
   8.0000000e-05
   9.0000000e-05
   8.0000000e-05
   6.0000000e-05
   8.0000000e-05
   7.0000000e-05
   6.0000000e-05
   7.0000000e-05
   6.0000000e-05
   5.0000000e-05
   6.0000000e-05
   5.0000000e-05
   7.0000000e-05
   7.0000000e-05
   7.0000000e-05
   8.0000000e-05
   9.0000000e-05
   8.0000000e-05
   1.0000000e-04
   1.2000000e-04
   1.1000000e-04
   1.2000000e-04
   1.3000000e-04
   1.4000000e-04
   1.3000000e-04
   1.4000000e-04
   1.5000000e-04
   1.4000000e-04
   1.5000000e-04
   1.5000000e-04
   1.5000000e-04
   1.4000000e-04
   1.3000000e-04
   1.3000000e-04
   1.3000000e-04
   1.1000000e-04
   1.1000000e-04
   1.1000000e-04
   1.0000000e-04
   9.0000000e-05
   8.0000000e-05
   7.0000000e-05
   8.0000000e-05
   7.0000000e-05
   7.0000000e-05
   7.0000000e-05
   8.0000000e-05
   7.0000000e-05
   6.0000000e-05
   8.0000000e-05
   7.0000000e-05
   7.0000000e-05
   8.0000000e-05
   8.0000000e-05
   7.0000000e-05
   8.0000000e-05
   8.0000000e-05
   8.0000000e-05
   9.0000000e-05
   9.0000000e-05
   9.0000000e-05
   1.0000000e-04
   1.1000000e-04
   1.2000000e-04
   1.2000000e-04
   1.2000000e-04
   1.3000000e-04
   1.2000000e-04
   1.3000000e-04
   1.5000000e-04
   1.4000000e-04
   1.4000000e-04
   1.4000000e-04
   1.4000000e-04
   1.4000000e-04
   1.4000000e-04
   1.6000000e-04
   1.5000000e-04
   1.4000000e-04
   1.4000000e-04
   1.4000000e-04
   1.4000000e-04
   1.3000000e-04
   1.3000000e-04
   1.2000000e-04
   1.2000000e-04
   1.2000000e-04
   1.1000000e-04
   1.0000000e-04
   1.0000000e-04
   9.0000000e-05
   9.0000000e-05
   1.0000000e-04
   8.0000000e-05
   7.0000000e-05
   7.0000000e-05
   7.0000000e-05
   6.0000000e-05
   5.0000000e-05
   5.0000000e-05
   4.0000000e-05
   5.0000000e-05
   6.0000000e-05
   6.0000000e-05
   6.0000000e-05
   6.0000000e-05
   8.0000000e-05
   7.0000000e-05
   9.0000000e-05
   9.0000000e-05
   9.0000000e-05
   1.0000000e-04
   1.1000000e-04
   1.1000000e-04
   1.2000000e-04
   1.3000000e-04
   1.3000000e-04
   1.4000000e-04
   1.5000000e-04
   1.5000000e-04
   1.5000000e-04
   1.5000000e-04
   1.5000000e-04
   1.4000000e-04
   1.3000000e-04
   1.2000000e-04
   1.2000000e-04
   1.2000000e-04
   1.1000000e-04
   1.0000000e-04
   1.0000000e-04
   8.0000000e-05
   7.0000000e-05
   8.0000000e-05
   7.0000000e-05
   6.0000000e-05
   6.0000000e-05
   6.0000000e-05
   4.0000000e-05
   5.0000000e-05
   6.0000000e-05
   5.0000000e-05
   6.0000000e-05
   6.0000000e-05
   5.0000000e-05
   7.0000000e-05
   8.0000000e-05
   7.0000000e-05
   8.0000000e-05
   9.0000000e-05
   9.0000000e-05
   9.0000000e-05
   1.0000000e-04
   1.1000000e-04
   1.1000000e-04
   1.2000000e-04
   1.3000000e-04
   1.2000000e-04
   1.2000000e-04
   1.3000000e-04
   1.3000000e-04
   1.3000000e-04
   1.3000000e-04
   1.3000000e-04
   1.4000000e-04
   1.2000000e-04
   1.2000000e-04
   1.2000000e-04
   1.2000000e-04
   1.2000000e-04
   1.1000000e-04
   1.1000000e-04
   1.0000000e-04
   9.0000000e-05
   1.0000000e-04
   9.0000000e-05
   9.0000000e-05
   9.0000000e-05
   8.0000000e-05
   6.0000000e-05
   7.0000000e-05
   8.0000000e-05
   7.0000000e-05
   7.0000000e-05
   8.0000000e-05
   7.0000000e-05
   7.0000000e-05
   8.0000000e-05
   8.0000000e-05
   7.0000000e-05
   8.0000000e-05
   8.0000000e-05
   8.0000000e-05
   8.0000000e-05
   9.0000000e-05
   9.0000000e-05
   9.0000000e-05
   9.0000000e-05
   9.0000000e-05
   1.0000000e-04
   1.1000000e-04
   1.1000000e-04
   1.0000000e-04
   1.1000000e-04
   1.1000000e-04
   1.2000000e-04
   1.2000000e-04
   1.1000000e-04
   1.3000000e-04
   1.3000000e-04
   1.2000000e-04
   1.3000000e-04
   1.3000000e-04
   1.3000000e-04
   1.3000000e-04
   1.3000000e-04
   1.2000000e-04
   1.2000000e-04
   1.2000000e-04
   1.1000000e-04
   1.2000000e-04
   1.2000000e-04
   1.0000000e-04
   1.0000000e-04
   1.0000000e-04
   1.0000000e-04
   1.0000000e-04
   9.0000000e-05
   1.0000000e-04
   9.0000000e-05
   7.0000000e-05
   8.0000000e-05
   8.0000000e-05
   6.0000000e-05
   7.0000000e-05
   6.0000000e-05
   7.0000000e-05
   7.0000000e-05
   7.0000000e-05
   8.0000000e-05
   8.0000000e-05
   8.0000000e-05
   9.0000000e-05
   1.0000000e-04
   1.0000000e-04
   1.1000000e-04
   1.1000000e-04
   1.1000000e-04
   1.3000000e-04
   1.3000000e-04
   1.3000000e-04
   1.4000000e-04
   1.5000000e-04
   1.4000000e-04
   1.4000000e-04
   1.4000000e-04
   1.4000000e-04
   1.3000000e-04
   1.3000000e-04
   1.3000000e-04
   1.3000000e-04
   1.3000000e-04
   1.2000000e-04
   1.2000000e-04
   1.1000000e-04
   1.0000000e-04
   9.0000000e-05
   8.0000000e-05
   7.0000000e-05
   7.0000000e-05
   7.0000000e-05
   5.0000000e-05
   6.0000000e-05
   6.0000000e-05
   5.0000000e-05
   6.0000000e-05
   6.0000000e-05
   5.0000000e-05
   5.0000000e-05
   7.0000000e-05
   7.0000000e-05
   7.0000000e-05
   6.0000000e-05
   8.0000000e-05
   8.0000000e-05
   8.0000000e-05
   1.0000000e-04
   1.1000000e-04
   1.1000000e-04
   1.1000000e-04
   1.3000000e-04
   1.2000000e-04
   1.3000000e-04
   1.5000000e-04
   1.4000000e-04
   1.4000000e-04
   1.6000000e-04
   1.5000000e-04
   1.5000000e-04
   1.5000000e-04
   1.5000000e-04
   1.5000000e-04
   1.4000000e-04
   1.4000000e-04
   1.4000000e-04
   1.3000000e-04
   1.3000000e-04
   1.2000000e-04
   1.2000000e-04
   1.2000000e-04
   1.0000000e-04
   1.0000000e-04
   1.0000000e-04
   9.0000000e-05
   9.0000000e-05
   9.0000000e-05
   8.0000000e-05
   8.0000000e-05
   9.0000000e-05
   8.0000000e-05
   8.0000000e-05
   8.0000000e-05
   7.0000000e-05
   7.0000000e-05
   7.0000000e-05
   8.0000000e-05
   9.0000000e-05
   8.0000000e-05
   7.0000000e-05
   9.0000000e-05
   9.0000000e-05
   9.0000000e-05
   1.0000000e-04
   1.0000000e-04
   1.1000000e-04
   1.0000000e-04
   1.1000000e-04
   1.2000000e-04
   1.1000000e-04
   1.4000000e-04
   1.3000000e-04
   1.3000000e-04
   1.5000000e-04
   1.5000000e-04
   1.4000000e-04
   1.4000000e-04
   1.5000000e-04
   1.4000000e-04
   1.3000000e-04
   1.4000000e-04
   1.2000000e-04
   1.2000000e-04
   1.2000000e-04
   1.0000000e-04
   1.0000000e-04
   1.0000000e-04
   9.0000000e-05
   8.0000000e-05
   8.0000000e-05
   7.0000000e-05
   6.0000000e-05
   7.0000000e-05
   7.0000000e-05
   6.0000000e-05
   6.0000000e-05
   6.0000000e-05
   6.0000000e-05
   5.0000000e-05
   6.0000000e-05
   6.0000000e-05
   6.0000000e-05
   5.0000000e-05
   6.0000000e-05
   7.0000000e-05
   7.0000000e-05
   7.0000000e-05
   9.0000000e-05
   1.0000000e-04
   1.1000000e-04
   1.2000000e-04
   1.3000000e-04
   1.3000000e-04
   1.4000000e-04
   1.5000000e-04
   1.5000000e-04
   1.5000000e-04
   1.7000000e-04
   1.6000000e-04
   1.6000000e-04
   1.6000000e-04
   1.6000000e-04
   1.6000000e-04
   1.6000000e-04
   1.4000000e-04
   1.3000000e-04
   1.3000000e-04
   1.2000000e-04
   1.2000000e-04
   1.1000000e-04
   1.0000000e-04
   1.0000000e-04
   9.0000000e-05
   9.0000000e-05
   8.0000000e-05
   8.0000000e-05
   7.0000000e-05
   7.0000000e-05
   7.0000000e-05
   6.0000000e-05
   7.0000000e-05
   8.0000000e-05
   5.0000000e-05
   6.0000000e-05
   7.0000000e-05
   7.0000000e-05
   7.0000000e-05
   8.0000000e-05
   9.0000000e-05
   1.0000000e-04
   1.0000000e-04
   1.2000000e-04
   1.1000000e-04
   1.1000000e-04
   1.2000000e-04
   1.3000000e-04
   1.3000000e-04
   1.4000000e-04
   1.5000000e-04
   1.4000000e-04
   1.5000000e-04
   1.5000000e-04
   1.5000000e-04
   1.5000000e-04
   1.4000000e-04
   1.4000000e-04
   1.4000000e-04
   1.3000000e-04
   1.3000000e-04
   1.2000000e-04
   1.2000000e-04
   1.2000000e-04
   1.1000000e-04
   1.2000000e-04
   1.1000000e-04
   1.0000000e-04
   1.0000000e-04
   9.0000000e-05
   9.0000000e-05
   1.0000000e-04
   8.0000000e-05
   7.0000000e-05
   8.0000000e-05
   7.0000000e-05
   7.0000000e-05
   7.0000000e-05
   6.0000000e-05
   7.0000000e-05
   6.0000000e-05
   6.0000000e-05
   8.0000000e-05
   5.0000000e-05
   7.0000000e-05
   9.0000000e-05
   7.0000000e-05
   8.0000000e-05
   9.0000000e-05
   9.0000000e-05
   9.0000000e-05
   1.1000000e-04
   1.1000000e-04
   1.0000000e-04
   1.1000000e-04
   1.3000000e-04
   1.2000000e-04
   1.3000000e-04
   1.4000000e-04
   1.3000000e-04
   1.4000000e-04
   1.4000000e-04
   1.4000000e-04
   1.4000000e-04
   1.3000000e-04
   1.4000000e-04
   1.4000000e-04
   1.2000000e-04
   1.2000000e-04
   1.3000000e-04
   1.1000000e-04
   1.1000000e-04
   1.2000000e-04
   1.0000000e-04
   9.0000000e-05
   1.0000000e-04
   8.0000000e-05
   8.0000000e-05
   8.0000000e-05
   8.0000000e-05
   7.0000000e-05
   5.0000000e-05
   6.0000000e-05
   7.0000000e-05
   6.0000000e-05
   7.0000000e-05
   7.0000000e-05
   6.0000000e-05
   8.0000000e-05
   8.0000000e-05
   7.0000000e-05
   9.0000000e-05
   9.0000000e-05
   9.0000000e-05
   9.0000000e-05
   1.0000000e-04
   1.1000000e-04
   1.0000000e-04
   1.2000000e-04
   1.3000000e-04
   1.3000000e-04
   1.4000000e-04
   1.5000000e-04
   1.5000000e-04
   1.5000000e-04
   1.5000000e-04
   1.5000000e-04
   1.6000000e-04
   1.5000000e-04
   1.4000000e-04
   1.5000000e-04
   1.4000000e-04
   1.4000000e-04
   1.4000000e-04
   1.3000000e-04
   1.3000000e-04
   1.3000000e-04
   1.1000000e-04
   9.0000000e-05
   9.0000000e-05
   8.0000000e-05
   8.0000000e-05
   7.0000000e-05
   6.0000000e-05
   7.0000000e-05
   6.0000000e-05
   5.0000000e-05
   6.0000000e-05
   6.0000000e-05
   5.0000000e-05
   5.0000000e-05
   5.0000000e-05
   5.0000000e-05
   6.0000000e-05
   6.0000000e-05
   7.0000000e-05
   6.0000000e-05
   7.0000000e-05
   8.0000000e-05
   9.0000000e-05
   1.0000000e-04
   1.1000000e-04
   1.1000000e-04
   1.1000000e-04
   1.3000000e-04
   1.2000000e-04
   1.3000000e-04
   1.4000000e-04
   1.4000000e-04
   1.5000000e-04
   1.6000000e-04
   1.5000000e-04
   1.5000000e-04
   1.5000000e-04
   1.4000000e-04
   1.4000000e-04
   1.3000000e-04
   1.3000000e-04
   1.1000000e-04
   1.1000000e-04
   1.1000000e-04
   1.0000000e-04
   1.0000000e-04
   9.0000000e-05
   8.0000000e-05
   8.0000000e-05
   7.0000000e-05
   6.0000000e-05
   7.0000000e-05
   6.0000000e-05
   5.0000000e-05
   5.0000000e-05
   6.0000000e-05
   7.0000000e-05
   6.0000000e-05
   7.0000000e-05
   8.0000000e-05
   7.0000000e-05
   7.0000000e-05
   8.0000000e-05
   9.0000000e-05
   1.0000000e-04
   1.0000000e-04
   1.0000000e-04
   1.0000000e-04
   1.2000000e-04
   1.3000000e-04
   1.3000000e-04
   1.4000000e-04
   1.5000000e-04
   1.6000000e-04
   1.6000000e-04
   1.6000000e-04
   1.8000000e-04
   1.7000000e-04
   1.7000000e-04
   1.7000000e-04
   1.6000000e-04
   1.5000000e-04
   1.5000000e-04
   1.4000000e-04
   1.3000000e-04
   1.4000000e-04
   1.3000000e-04
   1.2000000e-04
   1.1000000e-04
   1.1000000e-04
   9.0000000e-05
   8.0000000e-05
   9.0000000e-05
   7.0000000e-05
   7.0000000e-05
   7.0000000e-05
   5.0000000e-05
   4.0000000e-05
   5.0000000e-05
   5.0000000e-05
   4.0000000e-05
   6.0000000e-05
   6.0000000e-05
   5.0000000e-05
   6.0000000e-05
   6.0000000e-05
   6.0000000e-05
   6.0000000e-05
   7.0000000e-05
   8.0000000e-05
   8.0000000e-05
   9.0000000e-05
   1.1000000e-04
   1.1000000e-04
   1.0000000e-04
   1.2000000e-04
   1.3000000e-04
   1.4000000e-04
   1.4000000e-04
   1.4000000e-04
   1.5000000e-04
   1.4000000e-04
   1.4000000e-04
   1.6000000e-04
   1.4000000e-04
   1.4000000e-04
   1.5000000e-04
   1.4000000e-04
   1.2000000e-04
   1.2000000e-04
   1.1000000e-04
   1.0000000e-04
   9.0000000e-05
   9.0000000e-05
   8.0000000e-05
   8.0000000e-05
   8.0000000e-05
   7.0000000e-05
   7.0000000e-05
   8.0000000e-05
   7.0000000e-05
   6.0000000e-05
   7.0000000e-05
   7.0000000e-05
   8.0000000e-05
   7.0000000e-05
   8.0000000e-05
   8.0000000e-05
   9.0000000e-05
   9.0000000e-05
   9.0000000e-05
   1.0000000e-04
   1.1000000e-04
   1.1000000e-04
   1.1000000e-04
   1.2000000e-04
   1.2000000e-04
   1.2000000e-04
   1.3000000e-04
   1.2000000e-04
   1.2000000e-04
   1.3000000e-04
   1.3000000e-04
   1.3000000e-04
   1.4000000e-04
   1.4000000e-04
   1.4000000e-04
   1.4000000e-04
   1.4000000e-04
   1.4000000e-04
   1.4000000e-04
   1.3000000e-04
   1.3000000e-04
   1.3000000e-04
   1.3000000e-04
   1.3000000e-04
   1.2000000e-04
   1.1000000e-04
   1.2000000e-04
   1.1000000e-04
   1.1000000e-04
   1.2000000e-04
   1.1000000e-04
   9.0000000e-05
   9.0000000e-05
   9.0000000e-05
   8.0000000e-05
   8.0000000e-05
   7.0000000e-05
   7.0000000e-05
   6.0000000e-05
   7.0000000e-05
   8.0000000e-05
   7.0000000e-05
   6.0000000e-05
   7.0000000e-05
   8.0000000e-05
   6.0000000e-05
   6.0000000e-05
   7.0000000e-05
   7.0000000e-05
   7.0000000e-05
   9.0000000e-05
   9.0000000e-05
   1.0000000e-04
   1.1000000e-04
   1.1000000e-04
   1.3000000e-04
   1.3000000e-04
   1.5000000e-04
   1.5000000e-04
   1.5000000e-04
   1.5000000e-04
   1.5000000e-04
   1.5000000e-04
   1.6000000e-04
   1.6000000e-04
   1.5000000e-04
   1.5000000e-04
   1.6000000e-04
   1.5000000e-04
   1.4000000e-04
   1.4000000e-04
   1.3000000e-04
   1.2000000e-04
   1.1000000e-04
   9.0000000e-05
   8.0000000e-05
   8.0000000e-05
   7.0000000e-05
   7.0000000e-05
   7.0000000e-05
   7.0000000e-05
   7.0000000e-05
   6.0000000e-05
   7.0000000e-05
   7.0000000e-05
   6.0000000e-05
   6.0000000e-05
   6.0000000e-05
   5.0000000e-05
   5.0000000e-05
   7.0000000e-05
   7.0000000e-05
   8.0000000e-05
   9.0000000e-05
   9.0000000e-05
   1.0000000e-04
   1.1000000e-04
   1.3000000e-04
   1.3000000e-04
   1.4000000e-04
   1.4000000e-04
   1.4000000e-04
   1.5000000e-04
   1.5000000e-04
   1.6000000e-04
   1.5000000e-04
   1.5000000e-04
   1.6000000e-04
   1.5000000e-04
   1.5000000e-04
   1.6000000e-04
   1.4000000e-04
   1.4000000e-04
   1.4000000e-04
   1.3000000e-04
   1.2000000e-04
   1.1000000e-04
   1.1000000e-04
   1.0000000e-04
   9.0000000e-05
   9.0000000e-05
   8.0000000e-05
   7.0000000e-05
   6.0000000e-05
   7.0000000e-05
   7.0000000e-05
   6.0000000e-05
   7.0000000e-05
   7.0000000e-05
   6.0000000e-05
   6.0000000e-05
   6.0000000e-05
   7.0000000e-05
   7.0000000e-05
   8.0000000e-05
   8.0000000e-05
   8.0000000e-05
   8.0000000e-05
   9.0000000e-05
   1.0000000e-04
   1.0000000e-04
   1.1000000e-04
   1.2000000e-04
   1.2000000e-04
   1.3000000e-04
   1.4000000e-04
   1.5000000e-04
   1.5000000e-04
   1.6000000e-04
   1.6000000e-04
   1.5000000e-04
   1.6000000e-04
   1.5000000e-04
   1.5000000e-04
   1.5000000e-04
   1.5000000e-04
   1.4000000e-04
   1.3000000e-04
   1.2000000e-04
   1.2000000e-04
   1.1000000e-04
   1.0000000e-04
   1.0000000e-04
   8.0000000e-05
   8.0000000e-05
   7.0000000e-05
   6.0000000e-05
   7.0000000e-05
   5.0000000e-05
   4.0000000e-05
   6.0000000e-05
   6.0000000e-05
   4.0000000e-05
   5.0000000e-05
   4.0000000e-05
   4.0000000e-05
   6.0000000e-05
   6.0000000e-05
   7.0000000e-05
   6.0000000e-05
   8.0000000e-05
   9.0000000e-05
   9.0000000e-05
   9.0000000e-05
   1.1000000e-04
   1.2000000e-04
   1.2000000e-04
   1.2000000e-04
   1.3000000e-04
   1.4000000e-04
   1.4000000e-04
   1.5000000e-04
   1.6000000e-04
   1.6000000e-04
   1.6000000e-04
   1.6000000e-04
   1.5000000e-04
   1.5000000e-04
   1.4000000e-04
   1.4000000e-04
   1.3000000e-04
   1.3000000e-04
   1.3000000e-04
   1.2000000e-04
   1.1000000e-04
   1.1000000e-04
   1.0000000e-04
   9.0000000e-05
   8.0000000e-05
   8.0000000e-05
   7.0000000e-05
   7.0000000e-05
   6.0000000e-05
   5.0000000e-05
   6.0000000e-05
   7.0000000e-05
   6.0000000e-05
   6.0000000e-05
   6.0000000e-05
   6.0000000e-05
   7.0000000e-05
   6.0000000e-05
   6.0000000e-05
   7.0000000e-05
   6.0000000e-05
   6.0000000e-05
   7.0000000e-05
   8.0000000e-05
   8.0000000e-05
   1.0000000e-04
   1.0000000e-04
   1.0000000e-04
   1.1000000e-04
   1.1000000e-04
   1.0000000e-04
   1.1000000e-04
   1.3000000e-04
   1.2000000e-04
   1.3000000e-04
   1.3000000e-04
   1.3000000e-04
   1.3000000e-04
   1.4000000e-04
   1.4000000e-04
   1.4000000e-04
   1.3000000e-04
   1.3000000e-04
   1.4000000e-04
   1.3000000e-04
   1.2000000e-04
   1.2000000e-04
   1.2000000e-04
   1.2000000e-04
   1.2000000e-04
   1.1000000e-04
   1.1000000e-04
   1.1000000e-04
   1.0000000e-04
   9.0000000e-05
   9.0000000e-05
   1.0000000e-04
   8.0000000e-05
   7.0000000e-05
   8.0000000e-05
   7.0000000e-05
   7.0000000e-05
   8.0000000e-05
   7.0000000e-05
   7.0000000e-05
   8.0000000e-05
   8.0000000e-05
   8.0000000e-05
   8.0000000e-05
   9.0000000e-05
   9.0000000e-05
   1.0000000e-04
   1.0000000e-04
   1.1000000e-04
   1.2000000e-04
   1.2000000e-04
   1.3000000e-04
   1.4000000e-04
   1.4000000e-04
   1.4000000e-04
   1.5000000e-04
   1.5000000e-04
   1.4000000e-04
   1.5000000e-04
   1.5000000e-04
   1.4000000e-04
   1.5000000e-04
   1.5000000e-04
   1.4000000e-04
   1.3000000e-04
   1.3000000e-04
   1.3000000e-04
   1.1000000e-04
   1.0000000e-04
   9.0000000e-05
   8.0000000e-05
   7.0000000e-05
   6.0000000e-05
   6.0000000e-05
   5.0000000e-05
   4.0000000e-05
   5.0000000e-05
   4.0000000e-05
   4.0000000e-05
   5.0000000e-05
   5.0000000e-05
   5.0000000e-05
   4.0000000e-05
   4.0000000e-05
   5.0000000e-05
   6.0000000e-05
   7.0000000e-05
   8.0000000e-05
   9.0000000e-05
   9.0000000e-05
   1.0000000e-04
   1.2000000e-04
   1.2000000e-04
   1.2000000e-04
   1.4000000e-04
   1.4000000e-04
   1.3000000e-04
   1.5000000e-04
   1.6000000e-04
   1.5000000e-04
   1.6000000e-04
   1.6000000e-04
   1.6000000e-04
   1.6000000e-04
   1.6000000e-04
   1.5000000e-04
   1.4000000e-04
   1.4000000e-04
   1.2000000e-04
   1.1000000e-04
   1.2000000e-04
   1.0000000e-04
   9.0000000e-05
   8.0000000e-05
   8.0000000e-05
   7.0000000e-05
   7.0000000e-05
   6.0000000e-05
   7.0000000e-05
   6.0000000e-05
   4.0000000e-05
   6.0000000e-05
   5.0000000e-05
   5.0000000e-05
   6.0000000e-05
   5.0000000e-05
   5.0000000e-05
   6.0000000e-05
   5.0000000e-05
   6.0000000e-05
   7.0000000e-05
   6.0000000e-05
   8.0000000e-05
   8.0000000e-05
   8.0000000e-05
   9.0000000e-05
   1.0000000e-04
   1.1000000e-04
   1.1000000e-04
   1.1000000e-04
   1.2000000e-04
   1.3000000e-04
   1.4000000e-04
   1.4000000e-04
   1.5000000e-04
   1.5000000e-04
   1.5000000e-04
   1.6000000e-04
   1.6000000e-04
   1.6000000e-04
   1.6000000e-04
   1.5000000e-04
   1.4000000e-04
   1.4000000e-04
   1.4000000e-04
   1.2000000e-04
   1.1000000e-04
   1.1000000e-04
   9.0000000e-05
   9.0000000e-05
   8.0000000e-05
   7.0000000e-05
   7.0000000e-05
   6.0000000e-05
   4.0000000e-05
   5.0000000e-05
   5.0000000e-05
   3.0000000e-05
   4.0000000e-05
   3.0000000e-05
   2.0000000e-05
   4.0000000e-05
   4.0000000e-05
   4.0000000e-05
   5.0000000e-05
   6.0000000e-05
   6.0000000e-05
   9.0000000e-05
   9.0000000e-05
   9.0000000e-05
   1.1000000e-04
   1.2000000e-04
   1.3000000e-04
   1.4000000e-04
   1.5000000e-04
   1.6000000e-04
   1.6000000e-04
   1.7000000e-04
   1.8000000e-04
   1.8000000e-04
   1.8000000e-04
   1.8000000e-04
   1.7000000e-04
   1.6000000e-04
   1.5000000e-04
   1.4000000e-04
   1.3000000e-04
   1.3000000e-04
   1.1000000e-04
   1.0000000e-04
   1.0000000e-04
   1.0000000e-04
   9.0000000e-05
   7.0000000e-05
   7.0000000e-05
   7.0000000e-05
   5.0000000e-05
   5.0000000e-05
   5.0000000e-05
   4.0000000e-05
   5.0000000e-05
   5.0000000e-05
   6.0000000e-05
   7.0000000e-05
   6.0000000e-05
   7.0000000e-05
   8.0000000e-05
   7.0000000e-05
   7.0000000e-05
   9.0000000e-05
   9.0000000e-05
   8.0000000e-05
   1.0000000e-04
   1.1000000e-04
   1.0000000e-04
   1.1000000e-04
   1.2000000e-04
   1.2000000e-04
   1.3000000e-04
   1.4000000e-04
   1.4000000e-04
   1.4000000e-04
   1.3000000e-04
   1.4000000e-04
   1.5000000e-04
   1.4000000e-04
   1.4000000e-04
   1.5000000e-04
   1.4000000e-04
   1.4000000e-04
   1.5000000e-04
   1.5000000e-04
   1.4000000e-04
   1.4000000e-04
   1.4000000e-04
   1.2000000e-04
   1.2000000e-04
   1.2000000e-04
   1.1000000e-04
   1.1000000e-04
   1.0000000e-04
   9.0000000e-05
   9.0000000e-05
   8.0000000e-05
   8.0000000e-05
   8.0000000e-05
   7.0000000e-05
   6.0000000e-05
   6.0000000e-05
   5.0000000e-05
   5.0000000e-05
   5.0000000e-05
   5.0000000e-05
   5.0000000e-05
   6.0000000e-05
   6.0000000e-05
   7.0000000e-05
   8.0000000e-05
   8.0000000e-05
   9.0000000e-05
   1.1000000e-04
   1.1000000e-04
   1.2000000e-04
   1.3000000e-04
   1.4000000e-04
   1.4000000e-04
   1.5000000e-04
   1.6000000e-04
   1.7000000e-04
   1.8000000e-04
   1.8000000e-04
   1.8000000e-04
   1.8000000e-04
   1.9000000e-04
   1.7000000e-04
   1.7000000e-04
   1.7000000e-04
   1.6000000e-04
   1.5000000e-04
   1.4000000e-04
   1.3000000e-04
   1.1000000e-04
   1.0000000e-04
   9.0000000e-05
   8.0000000e-05
   7.0000000e-05
   7.0000000e-05
   5.0000000e-05
   5.0000000e-05
   4.0000000e-05
   3.0000000e-05
   4.0000000e-05
   4.0000000e-05
   4.0000000e-05
   5.0000000e-05
   4.0000000e-05
   6.0000000e-05
   7.0000000e-05
   6.0000000e-05
   7.0000000e-05
   9.0000000e-05
   9.0000000e-05
   1.0000000e-04
   1.0000000e-04
   1.1000000e-04
   1.2000000e-04
   1.3000000e-04
   1.3000000e-04
   1.4000000e-04
   1.4000000e-04
   1.5000000e-04
   1.6000000e-04
   1.6000000e-04
   1.4000000e-04
   1.6000000e-04
   1.5000000e-04
   1.4000000e-04
   1.5000000e-04
   1.4000000e-04
   1.2000000e-04
   1.1000000e-04
   1.2000000e-04
   1.0000000e-04
   9.0000000e-05
   9.0000000e-05
   9.0000000e-05
   8.0000000e-05
   7.0000000e-05
   7.0000000e-05
   6.0000000e-05
   5.0000000e-05
   5.0000000e-05
   5.0000000e-05
   5.0000000e-05
   6.0000000e-05
   6.0000000e-05
   6.0000000e-05
   7.0000000e-05
   8.0000000e-05
   8.0000000e-05
   8.0000000e-05
   8.0000000e-05
   8.0000000e-05
   8.0000000e-05
   8.0000000e-05
   8.0000000e-05
   8.0000000e-05
   9.0000000e-05
   9.0000000e-05
   9.0000000e-05
   1.1000000e-04
   1.1000000e-04
   1.1000000e-04
   1.2000000e-04
   1.1000000e-04
   1.2000000e-04
   1.2000000e-04
   1.3000000e-04
   1.4000000e-04
   1.4000000e-04
   1.5000000e-04
   1.6000000e-04
   1.6000000e-04
   1.6000000e-04
   1.6000000e-04
   1.7000000e-04
   1.6000000e-04
   1.5000000e-04
   1.4000000e-04
   1.4000000e-04
   1.4000000e-04
   1.4000000e-04
   1.3000000e-04
   1.1000000e-04
   1.1000000e-04
   1.2000000e-04
   1.0000000e-04
   9.0000000e-05
   9.0000000e-05
   7.0000000e-05
   5.0000000e-05
   6.0000000e-05
   4.0000000e-05
   4.0000000e-05
   4.0000000e-05
   3.0000000e-05
   3.0000000e-05
   3.0000000e-05
   3.0000000e-05
   3.0000000e-05
   3.0000000e-05
   5.0000000e-05
   5.0000000e-05
   6.0000000e-05
   8.0000000e-05
   9.0000000e-05
   9.0000000e-05
   1.0000000e-04
   1.3000000e-04
   1.3000000e-04
   1.6000000e-04
   1.7000000e-04
   1.7000000e-04
   1.8000000e-04
   1.8000000e-04
   1.9000000e-04
   1.9000000e-04
   1.8000000e-04
   1.8000000e-04
   1.7000000e-04
   1.6000000e-04
   1.6000000e-04
   1.5000000e-04
   1.5000000e-04
   1.2000000e-04
   1.1000000e-04
   1.2000000e-04
   9.0000000e-05
   8.0000000e-05
   8.0000000e-05
   6.0000000e-05
   5.0000000e-05
   4.0000000e-05
   4.0000000e-05
   3.0000000e-05
   3.0000000e-05
   3.0000000e-05
   3.0000000e-05
   4.0000000e-05
   3.0000000e-05
   4.0000000e-05
   5.0000000e-05
   5.0000000e-05
   7.0000000e-05
   7.0000000e-05
   8.0000000e-05
   9.0000000e-05
   1.0000000e-04
   1.1000000e-04
   1.3000000e-04
   1.3000000e-04
   1.4000000e-04
   1.5000000e-04
   1.6000000e-04
   1.6000000e-04
   1.6000000e-04
   1.8000000e-04
   1.7000000e-04
   1.6000000e-04
   1.7000000e-04
   1.8000000e-04
   1.6000000e-04
   1.5000000e-04
   1.6000000e-04
   1.5000000e-04
   1.3000000e-04
   1.3000000e-04
   1.2000000e-04
   1.1000000e-04
   1.0000000e-04
   9.0000000e-05
   9.0000000e-05
   8.0000000e-05
   8.0000000e-05
   8.0000000e-05
   7.0000000e-05
   6.0000000e-05
   7.0000000e-05
   6.0000000e-05
   6.0000000e-05
   8.0000000e-05
   6.0000000e-05
   5.0000000e-05
   7.0000000e-05
   6.0000000e-05
   6.0000000e-05
   7.0000000e-05
   7.0000000e-05
   7.0000000e-05
   7.0000000e-05
   7.0000000e-05
   8.0000000e-05
   8.0000000e-05
   9.0000000e-05
   1.0000000e-04
   9.0000000e-05
   1.0000000e-04
   1.2000000e-04
   1.2000000e-04
   1.2000000e-04
   1.4000000e-04
   1.5000000e-04
   1.4000000e-04
   1.5000000e-04
   1.5000000e-04
   1.6000000e-04
   1.6000000e-04
   1.5000000e-04
   1.5000000e-04
   1.5000000e-04
   1.6000000e-04
   1.5000000e-04
   1.5000000e-04
   1.4000000e-04
   1.3000000e-04
   1.2000000e-04
   1.2000000e-04
   1.1000000e-04
   1.0000000e-04
   8.0000000e-05
   8.0000000e-05
   8.0000000e-05
   7.0000000e-05
   6.0000000e-05
   7.0000000e-05
   7.0000000e-05
   5.0000000e-05
   5.0000000e-05
   6.0000000e-05
   4.0000000e-05
   4.0000000e-05
   5.0000000e-05
   4.0000000e-05
   5.0000000e-05
   5.0000000e-05
   6.0000000e-05
   7.0000000e-05
   8.0000000e-05
   9.0000000e-05
   1.1000000e-04
   1.1000000e-04
   1.2000000e-04
   1.3000000e-04
   1.3000000e-04
   1.4000000e-04
   1.5000000e-04
   1.6000000e-04
   1.6000000e-04
   1.8000000e-04
   1.8000000e-04
   1.8000000e-04
   1.9000000e-04
   1.8000000e-04
   1.7000000e-04
   1.7000000e-04
   1.6000000e-04
   1.5000000e-04
   1.4000000e-04
   1.2000000e-04
   1.3000000e-04
   1.1000000e-04
   1.0000000e-04
   1.0000000e-04
   1.0000000e-04
   8.0000000e-05
   7.0000000e-05
   6.0000000e-05
   6.0000000e-05
   5.0000000e-05
   5.0000000e-05
   4.0000000e-05
   4.0000000e-05
   5.0000000e-05
   5.0000000e-05
   4.0000000e-05
   6.0000000e-05
   7.0000000e-05
   7.0000000e-05
   7.0000000e-05
   8.0000000e-05
   8.0000000e-05
   9.0000000e-05
   1.0000000e-04
   9.0000000e-05
   1.0000000e-04
   1.1000000e-04
   1.2000000e-04
   1.2000000e-04
   1.3000000e-04
   1.4000000e-04
   1.5000000e-04
   1.5000000e-04
   1.6000000e-04
   1.6000000e-04
   1.6000000e-04
   1.6000000e-04
   1.5000000e-04
   1.5000000e-04
   1.4000000e-04
   1.4000000e-04
   1.4000000e-04
   1.4000000e-04
   1.3000000e-04
   1.3000000e-04
   1.3000000e-04
   1.0000000e-04
   1.1000000e-04
   1.1000000e-04
   9.0000000e-05
   8.0000000e-05
   8.0000000e-05
   6.0000000e-05
   5.0000000e-05
   7.0000000e-05
   6.0000000e-05
   6.0000000e-05
   6.0000000e-05
   5.0000000e-05
   6.0000000e-05
   4.0000000e-05
   4.0000000e-05
   6.0000000e-05
   3.0000000e-05
   4.0000000e-05
   6.0000000e-05
   4.0000000e-05
   5.0000000e-05
   7.0000000e-05
   7.0000000e-05
   9.0000000e-05
   9.0000000e-05
   1.1000000e-04
   1.2000000e-04
   1.2000000e-04
   1.3000000e-04
   1.4000000e-04
   1.4000000e-04
   1.4000000e-04
   1.5000000e-04
   1.5000000e-04
   1.5000000e-04
   1.6000000e-04
   1.5000000e-04
   1.6000000e-04
   1.6000000e-04
   1.5000000e-04
   1.4000000e-04
   1.4000000e-04
   1.2000000e-04
   1.1000000e-04
   1.0000000e-04
   9.0000000e-05
   8.0000000e-05
   7.0000000e-05
   7.0000000e-05
   7.0000000e-05
   5.0000000e-05
   5.0000000e-05
   5.0000000e-05
   3.0000000e-05
   5.0000000e-05
   4.0000000e-05
   4.0000000e-05
   3.0000000e-05
   3.0000000e-05
   4.0000000e-05
   4.0000000e-05
   5.0000000e-05
   5.0000000e-05
   5.0000000e-05
   7.0000000e-05
   8.0000000e-05
   7.0000000e-05
   9.0000000e-05
   1.0000000e-04
   1.0000000e-04
   1.2000000e-04
   1.3000000e-04
   1.3000000e-04
   1.4000000e-04
   1.5000000e-04
   1.5000000e-04
   1.6000000e-04
   1.7000000e-04
   1.7000000e-04
   1.8000000e-04
   1.7000000e-04
   1.6000000e-04
   1.6000000e-04
   1.6000000e-04
   1.6000000e-04
   1.4000000e-04
   1.3000000e-04
   1.3000000e-04
   1.2000000e-04
   1.1000000e-04
   1.0000000e-04
   1.0000000e-04
   8.0000000e-05
   8.0000000e-05
   8.0000000e-05
   7.0000000e-05
   5.0000000e-05
   6.0000000e-05
   6.0000000e-05
   5.0000000e-05
   5.0000000e-05
   5.0000000e-05
   4.0000000e-05
   4.0000000e-05
   5.0000000e-05
   5.0000000e-05
   5.0000000e-05
   6.0000000e-05
   7.0000000e-05
   8.0000000e-05
   8.0000000e-05
   8.0000000e-05
   9.0000000e-05
   9.0000000e-05
   9.0000000e-05
   1.2000000e-04
   1.2000000e-04
   1.2000000e-04
   1.4000000e-04
   1.4000000e-04
   1.5000000e-04
   1.6000000e-04
   1.7000000e-04
   1.7000000e-04
   1.7000000e-04
   1.7000000e-04
   1.7000000e-04
   1.6000000e-04
   1.6000000e-04
   1.6000000e-04
   1.4000000e-04
   1.4000000e-04
   1.4000000e-04
   1.2000000e-04
   1.1000000e-04
   1.1000000e-04
   1.0000000e-04
   9.0000000e-05
   8.0000000e-05
   8.0000000e-05
   5.0000000e-05
   5.0000000e-05
   6.0000000e-05
   4.0000000e-05
   3.0000000e-05
   4.0000000e-05
   4.0000000e-05
   3.0000000e-05
   3.0000000e-05
   5.0000000e-05
   5.0000000e-05
   5.0000000e-05
   6.0000000e-05
   5.0000000e-05
   6.0000000e-05
   8.0000000e-05
   9.0000000e-05
   9.0000000e-05
   1.1000000e-04
   1.2000000e-04
   1.3000000e-04
   1.4000000e-04
   1.6000000e-04
   1.7000000e-04
   1.6000000e-04
   1.8000000e-04
   1.8000000e-04
   1.8000000e-04
   1.8000000e-04
   1.9000000e-04
   1.8000000e-04
   1.8000000e-04
   1.7000000e-04
   1.7000000e-04
   1.6000000e-04
   1.5000000e-04
   1.4000000e-04
   1.3000000e-04
   1.1000000e-04
   1.0000000e-04
   9.0000000e-05
   7.0000000e-05
   7.0000000e-05
   4.0000000e-05
   4.0000000e-05
   4.0000000e-05
   3.0000000e-05
   4.0000000e-05
   4.0000000e-05
   4.0000000e-05
   5.0000000e-05
   4.0000000e-05
   4.0000000e-05
   4.0000000e-05
   4.0000000e-05
   4.0000000e-05
   5.0000000e-05
   5.0000000e-05
   6.0000000e-05
   8.0000000e-05
   9.0000000e-05
   1.0000000e-04
   1.1000000e-04
   1.1000000e-04
   1.2000000e-04
   1.4000000e-04
   1.3000000e-04
   1.3000000e-04
   1.5000000e-04
   1.5000000e-04
   1.5000000e-04
   1.6000000e-04
   1.6000000e-04
   1.7000000e-04
   1.7000000e-04
   1.7000000e-04
   1.8000000e-04
   1.8000000e-04
   1.6000000e-04
   1.6000000e-04
   1.5000000e-04
   1.3000000e-04
   1.3000000e-04
   1.3000000e-04
   1.1000000e-04
   1.2000000e-04
   1.1000000e-04
   1.1000000e-04
   1.1000000e-04
   9.0000000e-05
   9.0000000e-05
   8.0000000e-05
   7.0000000e-05
   6.0000000e-05
   7.0000000e-05
   7.0000000e-05
   5.0000000e-05
   6.0000000e-05
   6.0000000e-05
   6.0000000e-05
   6.0000000e-05
   7.0000000e-05
   7.0000000e-05
   6.0000000e-05
   7.0000000e-05
   8.0000000e-05
   7.0000000e-05
   8.0000000e-05
   9.0000000e-05
   1.0000000e-04
   1.1000000e-04
   1.3000000e-04
   1.3000000e-04
   1.5000000e-04
   1.6000000e-04
   1.6000000e-04
   1.7000000e-04
   1.7000000e-04
   1.7000000e-04
   1.7000000e-04
   1.8000000e-04
   1.8000000e-04
   1.7000000e-04
   1.7000000e-04
   1.6000000e-04
   1.5000000e-04
   1.4000000e-04
   1.4000000e-04
   1.3000000e-04
   1.0000000e-04
   1.0000000e-04
   9.0000000e-05
   7.0000000e-05
   6.0000000e-05
   6.0000000e-05
   5.0000000e-05
   4.0000000e-05
   3.0000000e-05
   2.0000000e-05
   2.0000000e-05
   2.0000000e-05
   1.0000000e-05
   1.0000000e-05
   2.0000000e-05
   2.0000000e-05
   1.0000000e-05
   2.0000000e-05
   3.0000000e-05
   4.0000000e-05
   5.0000000e-05
   7.0000000e-05
   8.0000000e-05
   8.0000000e-05
   1.0000000e-04
   1.1000000e-04
   1.2000000e-04
   1.4000000e-04
   1.5000000e-04
   1.6000000e-04
   1.6000000e-04
   1.6000000e-04
   1.8000000e-04
   1.8000000e-04
   1.8000000e-04
   1.9000000e-04
   1.9000000e-04
   1.8000000e-04
   1.7000000e-04
   1.7000000e-04
   1.5000000e-04
   1.3000000e-04
   1.3000000e-04
   1.2000000e-04
   1.0000000e-04
   1.0000000e-04
   9.0000000e-05
   7.0000000e-05
   7.0000000e-05
   6.0000000e-05
   6.0000000e-05
   5.0000000e-05
   5.0000000e-05
   4.0000000e-05
   4.0000000e-05
   4.0000000e-05
   4.0000000e-05
   4.0000000e-05
   4.0000000e-05
   5.0000000e-05
   5.0000000e-05
   6.0000000e-05
   7.0000000e-05
   8.0000000e-05
   9.0000000e-05
   1.0000000e-04
   1.0000000e-04
   1.1000000e-04
   1.2000000e-04
   1.2000000e-04
   1.3000000e-04
   1.4000000e-04
   1.6000000e-04
   1.5000000e-04
   1.7000000e-04
   1.8000000e-04
   1.8000000e-04
   1.8000000e-04
   1.7000000e-04
   1.8000000e-04
   1.7000000e-04
   1.7000000e-04
   1.7000000e-04
   1.6000000e-04
   1.5000000e-04
   1.5000000e-04
   1.4000000e-04
   1.3000000e-04
   1.3000000e-04
   1.1000000e-04
   1.1000000e-04
   1.0000000e-04
   9.0000000e-05
   8.0000000e-05
   6.0000000e-05
   7.0000000e-05
   6.0000000e-05
   6.0000000e-05
   5.0000000e-05
   5.0000000e-05
   5.0000000e-05
   5.0000000e-05
   5.0000000e-05
   5.0000000e-05
   4.0000000e-05
   4.0000000e-05
   5.0000000e-05
   6.0000000e-05
   5.0000000e-05
   6.0000000e-05
   7.0000000e-05
   8.0000000e-05
   9.0000000e-05
   1.0000000e-04
   1.0000000e-04
   1.1000000e-04
   1.2000000e-04
   1.4000000e-04
   1.5000000e-04
   1.6000000e-04
   1.6000000e-04
   1.6000000e-04
   1.7000000e-04
   1.8000000e-04
   1.8000000e-04
   1.8000000e-04
   1.9000000e-04
   1.8000000e-04
   1.7000000e-04
   1.8000000e-04
   1.7000000e-04
   1.6000000e-04
   1.5000000e-04
   1.4000000e-04
   1.2000000e-04
   1.1000000e-04
   1.1000000e-04
   9.0000000e-05
   7.0000000e-05
   7.0000000e-05
   6.0000000e-05
   5.0000000e-05
   6.0000000e-05
   4.0000000e-05
   4.0000000e-05
   5.0000000e-05
   4.0000000e-05
   3.0000000e-05
   4.0000000e-05
   3.0000000e-05
   3.0000000e-05
   4.0000000e-05
   4.0000000e-05
   4.0000000e-05
   6.0000000e-05
   7.0000000e-05
   7.0000000e-05
   8.0000000e-05
   1.0000000e-04
   1.1000000e-04
   1.1000000e-04
   1.2000000e-04
   1.3000000e-04
   1.3000000e-04
   1.5000000e-04
   1.5000000e-04
   1.6000000e-04
   1.8000000e-04
   1.7000000e-04
   1.7000000e-04
   1.7000000e-04
   1.6000000e-04
   1.5000000e-04
   1.5000000e-04
   1.5000000e-04
   1.4000000e-04
   1.3000000e-04
   1.1000000e-04
   1.1000000e-04
   1.0000000e-04
   9.0000000e-05
   8.0000000e-05
   8.0000000e-05
   8.0000000e-05
   7.0000000e-05
   6.0000000e-05
   5.0000000e-05
   6.0000000e-05
   5.0000000e-05
   5.0000000e-05
   5.0000000e-05
   5.0000000e-05
   6.0000000e-05
   5.0000000e-05
   6.0000000e-05
   6.0000000e-05
   6.0000000e-05
   7.0000000e-05
   7.0000000e-05
   7.0000000e-05
   7.0000000e-05
   9.0000000e-05
   1.0000000e-04
   1.0000000e-04
   1.0000000e-04
   1.2000000e-04
   1.3000000e-04
   1.3000000e-04
   1.5000000e-04
   1.5000000e-04
   1.6000000e-04
   1.7000000e-04
   1.7000000e-04
   1.7000000e-04
   1.8000000e-04
   1.7000000e-04
   1.7000000e-04
   1.8000000e-04
   1.7000000e-04
   1.6000000e-04
   1.5000000e-04
   1.5000000e-04
   1.5000000e-04
   1.4000000e-04
   1.4000000e-04
   1.2000000e-04
   1.2000000e-04
   1.0000000e-04
   9.0000000e-05
   9.0000000e-05
   7.0000000e-05
   7.0000000e-05
   6.0000000e-05
   5.0000000e-05
   6.0000000e-05
   6.0000000e-05
   5.0000000e-05
   5.0000000e-05
   3.0000000e-05
   4.0000000e-05
   3.0000000e-05
   4.0000000e-05
   4.0000000e-05
   4.0000000e-05
   5.0000000e-05
   6.0000000e-05
   7.0000000e-05
   9.0000000e-05
   1.0000000e-04
   1.1000000e-04
   1.2000000e-04
   1.3000000e-04
   1.3000000e-04
   1.4000000e-04
   1.5000000e-04
   1.5000000e-04
   1.7000000e-04
   1.8000000e-04
   1.7000000e-04
   1.8000000e-04
   1.8000000e-04
   1.7000000e-04
   1.7000000e-04
   1.7000000e-04
   1.6000000e-04
   1.5000000e-04
   1.4000000e-04
   1.2000000e-04
   1.0000000e-04
   1.0000000e-04
   8.0000000e-05
   8.0000000e-05
   8.0000000e-05
   6.0000000e-05
   6.0000000e-05
   5.0000000e-05
   4.0000000e-05
   3.0000000e-05
   3.0000000e-05
   2.0000000e-05
   2.0000000e-05
   2.0000000e-05
   2.0000000e-05
   2.0000000e-05
   3.0000000e-05
   5.0000000e-05
   5.0000000e-05
   7.0000000e-05
   8.0000000e-05
   7.0000000e-05
   9.0000000e-05
   9.0000000e-05
   9.0000000e-05
   1.1000000e-04
   1.2000000e-04
   1.2000000e-04
   1.3000000e-04
   1.4000000e-04
   1.5000000e-04
   1.6000000e-04
   1.7000000e-04
   1.8000000e-04
   1.7000000e-04
   1.8000000e-04
   1.7000000e-04
   1.8000000e-04
   1.7000000e-04
   1.6000000e-04
   1.5000000e-04
   1.5000000e-04
   1.5000000e-04
   1.4000000e-04
   1.3000000e-04
   1.3000000e-04
   1.1000000e-04
   1.0000000e-04
   1.0000000e-04
   9.0000000e-05
   7.0000000e-05
   6.0000000e-05
   6.0000000e-05
   5.0000000e-05
   4.0000000e-05
   5.0000000e-05
   5.0000000e-05
   5.0000000e-05
   5.0000000e-05
   5.0000000e-05
   4.0000000e-05
   5.0000000e-05
   5.0000000e-05
   3.0000000e-05
   5.0000000e-05
   7.0000000e-05
   6.0000000e-05
   7.0000000e-05
   9.0000000e-05
   8.0000000e-05
   1.0000000e-04
   1.1000000e-04
   1.2000000e-04
   1.2000000e-04
   1.3000000e-04
   1.4000000e-04
   1.5000000e-04
   1.6000000e-04
   1.6000000e-04
   1.6000000e-04
   1.7000000e-04
   1.8000000e-04
   1.7000000e-04
   1.7000000e-04
   1.8000000e-04
   1.7000000e-04
   1.5000000e-04
   1.5000000e-04
   1.4000000e-04
   1.2000000e-04
   1.2000000e-04
   1.1000000e-04
   9.0000000e-05
   9.0000000e-05
   7.0000000e-05
   6.0000000e-05
   5.0000000e-05
   5.0000000e-05
   5.0000000e-05
   5.0000000e-05
   5.0000000e-05
   5.0000000e-05
   4.0000000e-05
   3.0000000e-05
   4.0000000e-05
   3.0000000e-05
   2.0000000e-05
   3.0000000e-05
   4.0000000e-05
   3.0000000e-05
   4.0000000e-05
   6.0000000e-05
   7.0000000e-05
   8.0000000e-05
   9.0000000e-05
   1.0000000e-04
   1.1000000e-04
   1.2000000e-04
   1.2000000e-04
   1.3000000e-04
   1.5000000e-04
   1.5000000e-04
   1.7000000e-04
   1.9000000e-04
   1.9000000e-04
   1.9000000e-04
   2.0000000e-04
   1.9000000e-04
   1.8000000e-04
   1.9000000e-04
   1.7000000e-04
   1.6000000e-04
   1.5000000e-04
   1.5000000e-04
   1.2000000e-04
   1.1000000e-04
   1.1000000e-04
   1.0000000e-04
   8.0000000e-05
   8.0000000e-05
   7.0000000e-05
   5.0000000e-05
   5.0000000e-05
   4.0000000e-05
   4.0000000e-05
   3.0000000e-05
   2.0000000e-05
   3.0000000e-05
   2.0000000e-05
   1.0000000e-05
   2.0000000e-05
   3.0000000e-05
   4.0000000e-05
   4.0000000e-05
   4.0000000e-05
   5.0000000e-05
   6.0000000e-05
   7.0000000e-05
   8.0000000e-05
   8.0000000e-05
   9.0000000e-05
   1.1000000e-04
   1.2000000e-04
   1.4000000e-04
   1.4000000e-04
   1.6000000e-04
   1.8000000e-04
   1.8000000e-04
   1.9000000e-04
   1.9000000e-04
   1.9000000e-04
   1.9000000e-04
   1.8000000e-04
   1.8000000e-04
   1.7000000e-04
   1.6000000e-04
   1.5000000e-04
   1.4000000e-04
   1.4000000e-04
   1.2000000e-04
   1.1000000e-04
   1.2000000e-04
   1.0000000e-04
   9.0000000e-05
   8.0000000e-05
   6.0000000e-05
   7.0000000e-05
   5.0000000e-05
   5.0000000e-05
   4.0000000e-05
   3.0000000e-05
   4.0000000e-05
   4.0000000e-05
   3.0000000e-05
   4.0000000e-05
   4.0000000e-05
   4.0000000e-05
   5.0000000e-05
   5.0000000e-05
   5.0000000e-05
   6.0000000e-05
   6.0000000e-05
   8.0000000e-05
   7.0000000e-05
   9.0000000e-05
   1.1000000e-04
   1.1000000e-04
   1.2000000e-04
   1.3000000e-04
   1.4000000e-04
   1.6000000e-04
   1.7000000e-04
   1.7000000e-04
   1.7000000e-04
   1.8000000e-04
   1.7000000e-04
   1.7000000e-04
   1.8000000e-04
   1.7000000e-04
   1.7000000e-04
   1.6000000e-04
   1.6000000e-04
   1.5000000e-04
   1.4000000e-04
   1.4000000e-04
   1.3000000e-04
   1.1000000e-04
   1.0000000e-04
   9.0000000e-05
   8.0000000e-05
   7.0000000e-05
   6.0000000e-05
   5.0000000e-05
   5.0000000e-05
   4.0000000e-05
   2.0000000e-05
   3.0000000e-05
   4.0000000e-05
   3.0000000e-05
   2.0000000e-05
   2.0000000e-05
   2.0000000e-05
   1.0000000e-05
   4.0000000e-05
   4.0000000e-05
   3.0000000e-05
   5.0000000e-05
   6.0000000e-05
   7.0000000e-05
   8.0000000e-05
   1.1000000e-04
   1.2000000e-04
   1.1000000e-04
   1.3000000e-04
   1.5000000e-04
   1.4000000e-04
   1.4000000e-04
   1.6000000e-04
   1.7000000e-04
   1.6000000e-04
   1.7000000e-04
   1.8000000e-04
   1.7000000e-04
   1.6000000e-04
   1.7000000e-04
   1.6000000e-04
   1.4000000e-04
   1.4000000e-04
   1.3000000e-04
   1.1000000e-04
   9.0000000e-05
   9.0000000e-05
   9.0000000e-05
   7.0000000e-05
   7.0000000e-05
   6.0000000e-05
   5.0000000e-05
   4.0000000e-05
   4.0000000e-05
   4.0000000e-05
   3.0000000e-05
   3.0000000e-05
   4.0000000e-05
   3.0000000e-05
   2.0000000e-05
   5.0000000e-05
   4.0000000e-05
   3.0000000e-05
   6.0000000e-05
   7.0000000e-05
   7.0000000e-05
   8.0000000e-05
   9.0000000e-05
   1.0000000e-04
   1.0000000e-04
   1.2000000e-04
   1.2000000e-04
   1.3000000e-04
   1.3000000e-04
   1.4000000e-04
   1.5000000e-04
   1.6000000e-04
   1.7000000e-04
   1.8000000e-04
   1.8000000e-04
   1.8000000e-04
   1.8000000e-04
   1.8000000e-04
   1.7000000e-04
   1.6000000e-04
   1.6000000e-04
   1.5000000e-04
   1.4000000e-04
   1.4000000e-04
   1.4000000e-04
   1.2000000e-04
   1.1000000e-04
   1.1000000e-04
   1.0000000e-04
   8.0000000e-05
   8.0000000e-05
   6.0000000e-05
   5.0000000e-05
   5.0000000e-05
   4.0000000e-05
   3.0000000e-05
   3.0000000e-05
   4.0000000e-05
   3.0000000e-05
   4.0000000e-05
   3.0000000e-05
   3.0000000e-05
   3.0000000e-05
   3.0000000e-05
   4.0000000e-05
   4.0000000e-05
   3.0000000e-05
   5.0000000e-05
   6.0000000e-05
   6.0000000e-05
   8.0000000e-05
   1.0000000e-04
   1.0000000e-04
   1.1000000e-04
   1.2000000e-04
