# Supplementary material for: A Novel Classification Method for Flutter Signals Based on the CNN and STFT
Source: Hindawi journal article supplement (doi:10.1155/2019/9375437), 2019-04-09
Supplement: f1 [file 9375437.f1.zip › 01_9_z29.5_4channel.txt]

  -5.0000000e-05
  -5.0000000e-05
  -6.0000000e-05
  -4.0000000e-05
  -4.0000000e-05
  -3.0000000e-05
  -3.0000000e-05
  -3.0000000e-05
  -1.0000000e-05
  -1.0000000e-05
  -1.0000000e-05
  -0.0000000e+00
  -0.0000000e+00
  -1.0000000e-05
  -1.0000000e-05
  -0.0000000e+00
  -1.0000000e-05
  -1.0000000e-05
  -1.0000000e-05
  -0.0000000e+00
  -1.0000000e-05
  -2.0000000e-05
  -1.0000000e-05
  -1.0000000e-05
  -1.0000000e-05
  -0.0000000e+00
  -1.0000000e-05
  -1.0000000e-05
  -2.0000000e-05
  -2.0000000e-05
  -2.0000000e-05
  -3.0000000e-05
  -3.0000000e-05
  -3.0000000e-05
  -3.0000000e-05
  -3.0000000e-05
  -4.0000000e-05
  -5.0000000e-05
  -4.0000000e-05
  -5.0000000e-05
  -6.0000000e-05
  -4.0000000e-05
  -4.0000000e-05
  -4.0000000e-05
  -4.0000000e-05
  -4.0000000e-05
  -4.0000000e-05
  -5.0000000e-05
  -3.0000000e-05
  -2.0000000e-05
  -2.0000000e-05
   0.0000000e+00
  -2.0000000e-05
  -2.0000000e-05
  -1.0000000e-05
  -1.0000000e-05
  -1.0000000e-05
  -2.0000000e-05
  -1.0000000e-05
  -1.0000000e-05
  -1.0000000e-05
  -0.0000000e+00
  -0.0000000e+00
  -0.0000000e+00
  -1.0000000e-05
   0.0000000e+00
   1.0000000e-05
   1.0000000e-05
   1.0000000e-05
  -1.0000000e-05
  -2.0000000e-05
  -3.0000000e-05
  -2.0000000e-05
  -2.0000000e-05
  -3.0000000e-05
  -4.0000000e-05
  -4.0000000e-05
  -3.0000000e-05
  -4.0000000e-05
  -4.0000000e-05
  -4.0000000e-05
  -5.0000000e-05
  -4.0000000e-05
  -4.0000000e-05
  -3.0000000e-05
  -4.0000000e-05
  -5.0000000e-05
  -5.0000000e-05
  -5.0000000e-05
  -3.0000000e-05
  -3.0000000e-05
  -3.0000000e-05
  -1.0000000e-05
  -2.0000000e-05
  -2.0000000e-05
  -2.0000000e-05
  -2.0000000e-05
  -2.0000000e-05
  -2.0000000e-05
   1.0000000e-05
   1.0000000e-05
  -1.0000000e-05
  -0.0000000e+00
  -0.0000000e+00
  -2.0000000e-05
  -0.0000000e+00
   0.0000000e+00
   0.0000000e+00
   0.0000000e+00
   0.0000000e+00
  -1.0000000e-05
  -2.0000000e-05
  -3.0000000e-05
  -2.0000000e-05
  -1.0000000e-05
  -2.0000000e-05
  -1.0000000e-05
  -1.0000000e-05
  -3.0000000e-05
  -2.0000000e-05
  -2.0000000e-05
  -3.0000000e-05
  -2.0000000e-05
  -2.0000000e-05
  -2.0000000e-05
  -2.0000000e-05
  -3.0000000e-05
  -3.0000000e-05
  -3.0000000e-05
  -3.0000000e-05
  -2.0000000e-05
  -2.0000000e-05
  -3.0000000e-05
  -2.0000000e-05
  -3.0000000e-05
  -3.0000000e-05
  -1.0000000e-05
  -2.0000000e-05
  -1.0000000e-05
   0.0000000e+00
  -2.0000000e-05
  -1.0000000e-05
  -2.0000000e-05
  -1.0000000e-05
  -0.0000000e+00
  -1.0000000e-05
  -1.0000000e-05
  -1.0000000e-05
  -1.0000000e-05
  -2.0000000e-05
   0.0000000e+00
  -0.0000000e+00
  -1.0000000e-05
  -1.0000000e-05
  -1.0000000e-05
  -1.0000000e-05
   0.0000000e+00
  -0.0000000e+00
  -1.0000000e-05
  -2.0000000e-05
  -2.0000000e-05
   0.0000000e+00
  -0.0000000e+00
  -3.0000000e-05
  -2.0000000e-05
  -3.0000000e-05
  -3.0000000e-05
  -2.0000000e-05
  -2.0000000e-05
  -2.0000000e-05
  -3.0000000e-05
  -3.0000000e-05
  -2.0000000e-05
  -3.0000000e-05
  -3.0000000e-05
  -2.0000000e-05
  -1.0000000e-05
  -3.0000000e-05
  -2.0000000e-05
  -1.0000000e-05
  -2.0000000e-05
  -1.0000000e-05
  -2.0000000e-05
  -2.0000000e-05
  -1.0000000e-05
  -1.0000000e-05
  -1.0000000e-05
   1.0000000e-05
  -0.0000000e+00
  -1.0000000e-05
  -1.0000000e-05
  -2.0000000e-05
  -2.0000000e-05
  -1.0000000e-05
  -1.0000000e-05
  -1.0000000e-05
  -1.0000000e-05
  -1.0000000e-05
  -1.0000000e-05
  -2.0000000e-05
  -3.0000000e-05
  -3.0000000e-05
  -3.0000000e-05
  -4.0000000e-05
  -3.0000000e-05
  -3.0000000e-05
  -5.0000000e-05
  -4.0000000e-05
  -5.0000000e-05
  -4.0000000e-05
  -4.0000000e-05
  -5.0000000e-05
  -3.0000000e-05
  -3.0000000e-05
  -2.0000000e-05
  -1.0000000e-05
  -0.0000000e+00
  -1.0000000e-05
  -0.0000000e+00
   1.0000000e-05
   1.0000000e-05
   1.0000000e-05
   1.0000000e-05
   0.0000000e+00
   0.0000000e+00
  -0.0000000e+00
   1.0000000e-05
   2.0000000e-05
   3.0000000e-05
   3.0000000e-05
   2.0000000e-05
   4.0000000e-05
   4.0000000e-05
   4.0000000e-05
   4.0000000e-05
   5.0000000e-05
   5.0000000e-05
   2.0000000e-05
   2.0000000e-05
   1.0000000e-05
   1.0000000e-05
   1.0000000e-05
   0.0000000e+00
   1.0000000e-05
   0.0000000e+00
  -0.0000000e+00
  -1.0000000e-05
  -1.0000000e-05
  -2.0000000e-05
  -2.0000000e-05
  -2.0000000e-05
  -2.0000000e-05
  -3.0000000e-05
  -4.0000000e-05
  -4.0000000e-05
  -4.0000000e-05
  -4.0000000e-05
  -4.0000000e-05
  -5.0000000e-05
  -4.0000000e-05
  -5.0000000e-05
  -5.0000000e-05
  -4.0000000e-05
  -5.0000000e-05
  -5.0000000e-05
  -5.0000000e-05
  -4.0000000e-05
  -4.0000000e-05
  -4.0000000e-05
  -3.0000000e-05
  -3.0000000e-05
  -3.0000000e-05
  -2.0000000e-05
  -1.0000000e-05
   0.0000000e+00
   0.0000000e+00
  -1.0000000e-05
  -1.0000000e-05
   1.0000000e-05
   2.0000000e-05
   2.0000000e-05
   3.0000000e-05
   1.0000000e-05
   0.0000000e+00
   0.0000000e+00
  -1.0000000e-05
   1.0000000e-05
   0.0000000e+00
  -2.0000000e-05
  -2.0000000e-05
  -2.0000000e-05
  -2.0000000e-05
  -2.0000000e-05
  -3.0000000e-05
  -3.0000000e-05
  -4.0000000e-05
  -6.0000000e-05
  -6.0000000e-05
  -4.0000000e-05
  -5.0000000e-05
  -6.0000000e-05
  -6.0000000e-05
  -7.0000000e-05
  -7.0000000e-05
  -6.0000000e-05
  -7.0000000e-05
  -6.0000000e-05
  -5.0000000e-05
  -6.0000000e-05
  -3.0000000e-05
  -5.0000000e-05
  -5.0000000e-05
  -5.0000000e-05
  -4.0000000e-05
  -2.0000000e-05
  -1.0000000e-05
  -0.0000000e+00
  -1.0000000e-05
  -0.0000000e+00
   0.0000000e+00
   1.0000000e-05
   2.0000000e-05
   3.0000000e-05
   4.0000000e-05
   3.0000000e-05
   2.0000000e-05
   2.0000000e-05
   1.0000000e-05
   1.0000000e-05
   2.0000000e-05
   1.0000000e-05
   0.0000000e+00
   0.0000000e+00
   0.0000000e+00
  -1.0000000e-05
   0.0000000e+00
  -2.0000000e-05
  -2.0000000e-05
  -2.0000000e-05
  -3.0000000e-05
  -4.0000000e-05
  -4.0000000e-05
  -5.0000000e-05
  -6.0000000e-05
  -6.0000000e-05
  -4.0000000e-05
  -6.0000000e-05
  -7.0000000e-05
  -6.0000000e-05
  -6.0000000e-05
  -6.0000000e-05
  -6.0000000e-05
  -5.0000000e-05
  -6.0000000e-05
  -7.0000000e-05
  -7.0000000e-05
  -6.0000000e-05
  -4.0000000e-05
  -5.0000000e-05
  -4.0000000e-05
  -5.0000000e-05
  -5.0000000e-05
  -4.0000000e-05
  -3.0000000e-05
  -2.0000000e-05
  -2.0000000e-05
  -3.0000000e-05
  -4.0000000e-05
  -2.0000000e-05
  -1.0000000e-05
  -1.0000000e-05
  -1.0000000e-05
  -1.0000000e-05
  -2.0000000e-05
  -2.0000000e-05
  -2.0000000e-05
  -1.0000000e-05
  -1.0000000e-05
  -2.0000000e-05
  -2.0000000e-05
  -2.0000000e-05
  -1.0000000e-05
  -1.0000000e-05
  -2.0000000e-05
  -2.0000000e-05
  -0.0000000e+00
  -1.0000000e-05
  -0.0000000e+00
   0.0000000e+00
  -1.0000000e-05
  -3.0000000e-05
  -3.0000000e-05
  -2.0000000e-05
  -1.0000000e-05
  -3.0000000e-05
  -3.0000000e-05
  -2.0000000e-05
  -1.0000000e-05
  -1.0000000e-05
  -1.0000000e-05
  -0.0000000e+00
  -1.0000000e-05
  -1.0000000e-05
  -1.0000000e-05
  -0.0000000e+00
  -1.0000000e-05
  -2.0000000e-05
  -1.0000000e-05
  -1.0000000e-05
  -1.0000000e-05
   0.0000000e+00
   1.0000000e-05
   1.0000000e-05
  -0.0000000e+00
  -1.0000000e-05
  -0.0000000e+00
   0.0000000e+00
  -1.0000000e-05
  -1.0000000e-05
  -1.0000000e-05
  -3.0000000e-05
  -2.0000000e-05
  -2.0000000e-05
  -3.0000000e-05
  -3.0000000e-05
  -3.0000000e-05
  -2.0000000e-05
  -1.0000000e-05
  -3.0000000e-05
  -3.0000000e-05
  -5.0000000e-05
  -5.0000000e-05
  -5.0000000e-05
  -6.0000000e-05
  -6.0000000e-05
  -6.0000000e-05
  -6.0000000e-05
  -5.0000000e-05
  -5.0000000e-05
  -6.0000000e-05
  -7.0000000e-05
  -5.0000000e-05
  -5.0000000e-05
  -4.0000000e-05
  -4.0000000e-05
  -5.0000000e-05
  -4.0000000e-05
  -3.0000000e-05
  -2.0000000e-05
  -2.0000000e-05
   0.0000000e+00
   1.0000000e-05
   0.0000000e+00
   1.0000000e-05
   2.0000000e-05
   2.0000000e-05
   2.0000000e-05
   3.0000000e-05
   2.0000000e-05
   2.0000000e-05
   2.0000000e-05
   2.0000000e-05
   3.0000000e-05
   2.0000000e-05
   2.0000000e-05
   2.0000000e-05
   3.0000000e-05
   4.0000000e-05
   3.0000000e-05
   2.0000000e-05
   1.0000000e-05
  -0.0000000e+00
   0.0000000e+00
  -1.0000000e-05
  -2.0000000e-05
  -2.0000000e-05
  -4.0000000e-05
  -4.0000000e-05
  -4.0000000e-05
  -5.0000000e-05
  -6.0000000e-05
  -7.0000000e-05
  -7.0000000e-05
  -7.0000000e-05
  -6.0000000e-05
  -6.0000000e-05
  -7.0000000e-05
  -6.0000000e-05
  -6.0000000e-05
  -6.0000000e-05
  -7.0000000e-05
  -6.0000000e-05
  -6.0000000e-05
  -7.0000000e-05
  -6.0000000e-05
  -7.0000000e-05
  -7.0000000e-05
  -4.0000000e-05
  -5.0000000e-05
  -4.0000000e-05
  -4.0000000e-05
  -4.0000000e-05
  -2.0000000e-05
  -2.0000000e-05
  -2.0000000e-05
  -2.0000000e-05
  -2.0000000e-05
  -2.0000000e-05
  -2.0000000e-05
  -1.0000000e-05
  -2.0000000e-05
  -2.0000000e-05
  -2.0000000e-05
  -2.0000000e-05
  -3.0000000e-05
  -2.0000000e-05
  -1.0000000e-05
  -2.0000000e-05
  -2.0000000e-05
  -3.0000000e-05
  -2.0000000e-05
  -1.0000000e-05
  -0.0000000e+00
  -1.0000000e-05
  -1.0000000e-05
  -1.0000000e-05
   0.0000000e+00
  -0.0000000e+00
   0.0000000e+00
   0.0000000e+00
  -1.0000000e-05
  -0.0000000e+00
  -1.0000000e-05
  -1.0000000e-05
  -2.0000000e-05
  -1.0000000e-05
  -2.0000000e-05
  -1.0000000e-05
  -0.0000000e+00
  -1.0000000e-05
  -1.0000000e-05
  -2.0000000e-05
  -1.0000000e-05
  -1.0000000e-05
  -1.0000000e-05
  -1.0000000e-05
  -2.0000000e-05
  -2.0000000e-05
  -2.0000000e-05
  -3.0000000e-05
  -2.0000000e-05
  -3.0000000e-05
  -4.0000000e-05
  -3.0000000e-05
  -4.0000000e-05
  -5.0000000e-05
  -4.0000000e-05
  -5.0000000e-05
  -5.0000000e-05
  -6.0000000e-05
  -6.0000000e-05
  -5.0000000e-05
  -7.0000000e-05
  -8.0000000e-05
  -7.0000000e-05
  -8.0000000e-05
  -9.0000000e-05
  -8.0000000e-05
  -9.0000000e-05
  -1.0000000e-04
  -9.0000000e-05
  -9.0000000e-05
  -8.0000000e-05
  -8.0000000e-05
  -9.0000000e-05
  -7.0000000e-05
  -8.0000000e-05
  -8.0000000e-05
  -5.0000000e-05
  -7.0000000e-05
  -6.0000000e-05
  -5.0000000e-05
  -4.0000000e-05
  -2.0000000e-05
  -2.0000000e-05
  -1.0000000e-05
  -1.0000000e-05
   0.0000000e+00
   1.0000000e-05
   2.0000000e-05
   4.0000000e-05
   3.0000000e-05
   3.0000000e-05
   5.0000000e-05
   5.0000000e-05
   6.0000000e-05
   7.0000000e-05
   7.0000000e-05
   7.0000000e-05
   7.0000000e-05
   6.0000000e-05
   7.0000000e-05
   6.0000000e-05
   6.0000000e-05
   5.0000000e-05
   4.0000000e-05
   4.0000000e-05
   3.0000000e-05
   3.0000000e-05
   2.0000000e-05
   2.0000000e-05
   1.0000000e-05
   1.0000000e-05
   2.0000000e-05
   1.0000000e-05
  -1.0000000e-05
  -0.0000000e+00
  -1.0000000e-05
  -2.0000000e-05
  -3.0000000e-05
  -3.0000000e-05
  -3.0000000e-05
  -5.0000000e-05
  -5.0000000e-05
  -4.0000000e-05
  -4.0000000e-05
  -4.0000000e-05
  -4.0000000e-05
  -4.0000000e-05
  -5.0000000e-05
  -5.0000000e-05
  -4.0000000e-05
  -3.0000000e-05
  -3.0000000e-05
  -3.0000000e-05
  -4.0000000e-05
  -4.0000000e-05
  -5.0000000e-05
  -3.0000000e-05
  -2.0000000e-05
  -2.0000000e-05
  -3.0000000e-05
  -3.0000000e-05
  -3.0000000e-05
  -4.0000000e-05
  -3.0000000e-05
  -3.0000000e-05
  -3.0000000e-05
  -2.0000000e-05
  -3.0000000e-05
  -3.0000000e-05
  -3.0000000e-05
  -4.0000000e-05
  -3.0000000e-05
  -4.0000000e-05
  -3.0000000e-05
  -2.0000000e-05
  -2.0000000e-05
  -2.0000000e-05
  -2.0000000e-05
  -3.0000000e-05
  -2.0000000e-05
  -2.0000000e-05
  -2.0000000e-05
  -2.0000000e-05
  -1.0000000e-05
  -1.0000000e-05
  -1.0000000e-05
  -0.0000000e+00
  -1.0000000e-05
  -1.0000000e-05
   0.0000000e+00
   2.0000000e-05
   3.0000000e-05
   3.0000000e-05
   2.0000000e-05
   3.0000000e-05
   3.0000000e-05
   2.0000000e-05
   4.0000000e-05
   2.0000000e-05
   2.0000000e-05
   3.0000000e-05
   3.0000000e-05
   3.0000000e-05
   2.0000000e-05
   0.0000000e+00
   1.0000000e-05
   2.0000000e-05
   1.0000000e-05
   1.0000000e-05
  -0.0000000e+00
  -2.0000000e-05
  -2.0000000e-05
  -2.0000000e-05
  -2.0000000e-05
  -3.0000000e-05
  -4.0000000e-05
  -4.0000000e-05
  -5.0000000e-05
  -5.0000000e-05
  -5.0000000e-05
  -4.0000000e-05
  -5.0000000e-05
  -6.0000000e-05
  -6.0000000e-05
  -8.0000000e-05
  -6.0000000e-05
  -7.0000000e-05
  -8.0000000e-05
  -7.0000000e-05
  -9.0000000e-05
  -8.0000000e-05
  -7.0000000e-05
  -7.0000000e-05
  -7.0000000e-05
  -6.0000000e-05
  -6.0000000e-05
  -5.0000000e-05
  -5.0000000e-05
  -5.0000000e-05
  -5.0000000e-05
  -6.0000000e-05
  -4.0000000e-05
  -4.0000000e-05
  -3.0000000e-05
  -2.0000000e-05
  -2.0000000e-05
  -3.0000000e-05
  -3.0000000e-05
  -2.0000000e-05
  -1.0000000e-05
   0.0000000e+00
  -1.0000000e-05
  -1.0000000e-05
  -1.0000000e-05
  -2.0000000e-05
  -1.0000000e-05
  -0.0000000e+00
  -1.0000000e-05
  -2.0000000e-05
  -2.0000000e-05
  -2.0000000e-05
  -2.0000000e-05
  -1.0000000e-05
  -2.0000000e-05
  -2.0000000e-05
  -1.0000000e-05
  -2.0000000e-05
  -3.0000000e-05
  -4.0000000e-05
  -4.0000000e-05
  -4.0000000e-05
  -3.0000000e-05
  -3.0000000e-05
  -3.0000000e-05
  -4.0000000e-05
  -4.0000000e-05
  -3.0000000e-05
  -3.0000000e-05
  -3.0000000e-05
  -3.0000000e-05
  -3.0000000e-05
  -3.0000000e-05
  -3.0000000e-05
  -4.0000000e-05
  -4.0000000e-05
  -3.0000000e-05
  -3.0000000e-05
  -3.0000000e-05
  -1.0000000e-05
  -1.0000000e-05
  -1.0000000e-05
  -1.0000000e-05
  -2.0000000e-05
  -2.0000000e-05
  -2.0000000e-05
  -1.0000000e-05
  -2.0000000e-05
  -2.0000000e-05
  -4.0000000e-05
  -4.0000000e-05
  -2.0000000e-05
  -2.0000000e-05
  -1.0000000e-05
  -2.0000000e-05
  -3.0000000e-05
  -3.0000000e-05
  -3.0000000e-05
  -1.0000000e-05
  -2.0000000e-05
  -3.0000000e-05
  -3.0000000e-05
  -4.0000000e-05
  -4.0000000e-05
  -3.0000000e-05
  -3.0000000e-05
  -3.0000000e-05
  -4.0000000e-05
  -3.0000000e-05
  -1.0000000e-05
  -1.0000000e-05
  -2.0000000e-05
  -2.0000000e-05
  -2.0000000e-05
  -1.0000000e-05
  -1.0000000e-05
   0.0000000e+00
  -0.0000000e+00
  -2.0000000e-05
  -1.0000000e-05
  -0.0000000e+00
   0.0000000e+00
   0.0000000e+00
  -0.0000000e+00
  -0.0000000e+00
  -1.0000000e-05
  -1.0000000e-05
  -2.0000000e-05
  -2.0000000e-05
  -2.0000000e-05
  -1.0000000e-05
  -1.0000000e-05
  -1.0000000e-05
  -2.0000000e-05
  -3.0000000e-05
  -4.0000000e-05
  -5.0000000e-05
  -5.0000000e-05
  -6.0000000e-05
  -6.0000000e-05
  -7.0000000e-05
  -8.0000000e-05
  -8.0000000e-05
  -9.0000000e-05
  -8.0000000e-05
  -7.0000000e-05
  -8.0000000e-05
  -7.0000000e-05
  -8.0000000e-05
  -8.0000000e-05
  -6.0000000e-05
  -5.0000000e-05
  -5.0000000e-05
  -6.0000000e-05
  -5.0000000e-05
  -5.0000000e-05
  -4.0000000e-05
  -4.0000000e-05
  -2.0000000e-05
  -1.0000000e-05
  -2.0000000e-05
  -1.0000000e-05
  -1.0000000e-05
  -1.0000000e-05
   1.0000000e-05
   2.0000000e-05
   2.0000000e-05
   2.0000000e-05
   2.0000000e-05
   1.0000000e-05
   3.0000000e-05
   2.0000000e-05
   3.0000000e-05
   3.0000000e-05
   2.0000000e-05
   1.0000000e-05
  -1.0000000e-05
  -1.0000000e-05
  -0.0000000e+00
  -2.0000000e-05
  -2.0000000e-05
  -1.0000000e-05
  -2.0000000e-05
  -3.0000000e-05
  -1.0000000e-05
  -1.0000000e-05
  -2.0000000e-05
  -2.0000000e-05
  -1.0000000e-05
  -2.0000000e-05
  -4.0000000e-05
  -4.0000000e-05
  -4.0000000e-05
  -4.0000000e-05
  -4.0000000e-05
  -3.0000000e-05
  -3.0000000e-05
  -3.0000000e-05
  -4.0000000e-05
  -3.0000000e-05
  -1.0000000e-05
  -1.0000000e-05
   0.0000000e+00
  -0.0000000e+00
  -0.0000000e+00
  -0.0000000e+00
   0.0000000e+00
   1.0000000e-05
  -0.0000000e+00
   1.0000000e-05
   0.0000000e+00
   0.0000000e+00
   1.0000000e-05
   0.0000000e+00
   1.0000000e-05
   1.0000000e-05
   1.0000000e-05
   1.0000000e-05
   1.0000000e-05
   1.0000000e-05
   2.0000000e-05
   0.0000000e+00
  -0.0000000e+00
  -2.0000000e-05
  -4.0000000e-05
  -2.0000000e-05
  -3.0000000e-05
  -4.0000000e-05
  -4.0000000e-05
  -6.0000000e-05
  -6.0000000e-05
  -6.0000000e-05
  -6.0000000e-05
  -7.0000000e-05
  -7.0000000e-05
  -7.0000000e-05
  -7.0000000e-05
  -6.0000000e-05
  -7.0000000e-05
  -7.0000000e-05
  -6.0000000e-05
  -6.0000000e-05
  -6.0000000e-05
  -6.0000000e-05
  -5.0000000e-05
  -4.0000000e-05
  -3.0000000e-05
  -3.0000000e-05
  -4.0000000e-05
  -3.0000000e-05
  -2.0000000e-05
  -1.0000000e-05
  -1.0000000e-05
   0.0000000e+00
   2.0000000e-05
   2.0000000e-05
   3.0000000e-05
   5.0000000e-05
   4.0000000e-05
   5.0000000e-05
   5.0000000e-05
   6.0000000e-05
   7.0000000e-05
   5.0000000e-05
   5.0000000e-05
   4.0000000e-05
   4.0000000e-05
   5.0000000e-05
   5.0000000e-05
   5.0000000e-05
   3.0000000e-05
   3.0000000e-05
   4.0000000e-05
   3.0000000e-05
   4.0000000e-05
   2.0000000e-05
  -0.0000000e+00
  -1.0000000e-05
  -2.0000000e-05
  -2.0000000e-05
  -2.0000000e-05
  -5.0000000e-05
  -6.0000000e-05
  -7.0000000e-05
  -8.0000000e-05
  -8.0000000e-05
  -7.0000000e-05
  -8.0000000e-05
  -9.0000000e-05
  -9.0000000e-05
  -1.0000000e-04
  -1.0000000e-04
  -1.0000000e-04
  -1.0000000e-04
  -1.0000000e-04
  -1.1000000e-04
  -1.0000000e-04
  -9.0000000e-05
  -7.0000000e-05
  -6.0000000e-05
  -6.0000000e-05
  -6.0000000e-05
  -5.0000000e-05
  -4.0000000e-05
  -3.0000000e-05
  -2.0000000e-05
  -3.0000000e-05
  -3.0000000e-05
  -2.0000000e-05
  -1.0000000e-05
  -0.0000000e+00
   1.0000000e-05
   0.0000000e+00
   1.0000000e-05
   1.0000000e-05
   0.0000000e+00
   2.0000000e-05
   1.0000000e-05
  -0.0000000e+00
  -1.0000000e-05
  -1.0000000e-05
  -2.0000000e-05
  -2.0000000e-05
  -2.0000000e-05
  -3.0000000e-05
  -4.0000000e-05
  -6.0000000e-05
  -5.0000000e-05
  -5.0000000e-05
  -4.0000000e-05
  -4.0000000e-05
  -6.0000000e-05
  -7.0000000e-05
  -8.0000000e-05
  -7.0000000e-05
  -6.0000000e-05
  -6.0000000e-05
  -8.0000000e-05
  -8.0000000e-05
  -6.0000000e-05
  -6.0000000e-05
  -6.0000000e-05
  -5.0000000e-05
  -5.0000000e-05
  -4.0000000e-05
  -3.0000000e-05
  -2.0000000e-05
  -1.0000000e-05
  -2.0000000e-05
  -2.0000000e-05
  -0.0000000e+00
  -1.0000000e-05
   1.0000000e-05
   1.0000000e-05
   1.0000000e-05
   0.0000000e+00
   1.0000000e-05
   1.0000000e-05
   1.0000000e-05
   2.0000000e-05
   1.0000000e-05
   2.0000000e-05
   2.0000000e-05
   2.0000000e-05
   2.0000000e-05
   1.0000000e-05
   1.0000000e-05
   0.0000000e+00
  -0.0000000e+00
   0.0000000e+00
  -0.0000000e+00
  -0.0000000e+00
  -2.0000000e-05
  -3.0000000e-05
  -4.0000000e-05
  -3.0000000e-05
  -5.0000000e-05
  -4.0000000e-05
  -3.0000000e-05
  -5.0000000e-05
  -5.0000000e-05
  -5.0000000e-05
  -6.0000000e-05
  -6.0000000e-05
  -6.0000000e-05
  -6.0000000e-05
  -7.0000000e-05
  -6.0000000e-05
  -7.0000000e-05
  -6.0000000e-05
  -5.0000000e-05
  -5.0000000e-05
  -3.0000000e-05
  -3.0000000e-05
  -3.0000000e-05
  -1.0000000e-05
  -2.0000000e-05
  -2.0000000e-05
  -1.0000000e-05
  -2.0000000e-05
  -2.0000000e-05
  -2.0000000e-05
  -1.0000000e-05
  -1.0000000e-05
  -2.0000000e-05
  -3.0000000e-05
  -2.0000000e-05
  -2.0000000e-05
  -3.0000000e-05
  -2.0000000e-05
  -2.0000000e-05
  -5.0000000e-05
  -4.0000000e-05
  -4.0000000e-05
  -4.0000000e-05
  -4.0000000e-05
  -5.0000000e-05
  -5.0000000e-05
  -5.0000000e-05
  -6.0000000e-05
  -4.0000000e-05
  -4.0000000e-05
  -6.0000000e-05
  -5.0000000e-05
  -6.0000000e-05
  -6.0000000e-05
  -3.0000000e-05
  -3.0000000e-05
  -3.0000000e-05
  -3.0000000e-05
  -3.0000000e-05
  -3.0000000e-05
  -1.0000000e-05
  -1.0000000e-05
  -1.0000000e-05
   1.0000000e-05
   0.0000000e+00
   1.0000000e-05
   3.0000000e-05
   2.0000000e-05
   2.0000000e-05
   2.0000000e-05
   1.0000000e-05
   2.0000000e-05
   4.0000000e-05
   4.0000000e-05
   4.0000000e-05
   3.0000000e-05
   4.0000000e-05
   3.0000000e-05
   3.0000000e-05
   3.0000000e-05
   3.0000000e-05
   3.0000000e-05
   2.0000000e-05
   3.0000000e-05
   2.0000000e-05
   2.0000000e-05
   2.0000000e-05
   0.0000000e+00
   1.0000000e-05
   0.0000000e+00
   0.0000000e+00
  -0.0000000e+00
  -1.0000000e-05
  -2.0000000e-05
  -2.0000000e-05
  -3.0000000e-05
  -3.0000000e-05
  -3.0000000e-05
  -4.0000000e-05
  -4.0000000e-05
  -4.0000000e-05
  -5.0000000e-05
  -6.0000000e-05
  -6.0000000e-05
  -6.0000000e-05
  -7.0000000e-05
  -6.0000000e-05
  -6.0000000e-05
  -7.0000000e-05
  -8.0000000e-05
  -7.0000000e-05
  -6.0000000e-05
  -6.0000000e-05
  -6.0000000e-05
  -5.0000000e-05
  -5.0000000e-05
  -6.0000000e-05
  -6.0000000e-05
  -5.0000000e-05
  -5.0000000e-05
  -4.0000000e-05
  -3.0000000e-05
  -4.0000000e-05
  -4.0000000e-05
  -4.0000000e-05
  -3.0000000e-05
  -2.0000000e-05
  -2.0000000e-05
  -3.0000000e-05
  -3.0000000e-05
  -3.0000000e-05
  -3.0000000e-05
  -2.0000000e-05
  -2.0000000e-05
  -4.0000000e-05
  -4.0000000e-05
  -3.0000000e-05
  -1.0000000e-05
  -2.0000000e-05
  -3.0000000e-05
  -3.0000000e-05
  -2.0000000e-05
  -1.0000000e-05
  -2.0000000e-05
  -2.0000000e-05
  -3.0000000e-05
  -4.0000000e-05
  -3.0000000e-05
  -1.0000000e-05
  -2.0000000e-05
  -1.0000000e-05
  -1.0000000e-05
  -3.0000000e-05
  -2.0000000e-05
  -2.0000000e-05
  -3.0000000e-05
  -1.0000000e-05
  -2.0000000e-05
  -2.0000000e-05
  -2.0000000e-05
  -1.0000000e-05
  -2.0000000e-05
  -2.0000000e-05
  -2.0000000e-05
  -3.0000000e-05
  -2.0000000e-05
  -3.0000000e-05
  -3.0000000e-05
  -3.0000000e-05
  -5.0000000e-05
  -4.0000000e-05
  -5.0000000e-05
  -5.0000000e-05
  -5.0000000e-05
  -5.0000000e-05
  -5.0000000e-05
  -5.0000000e-05
  -5.0000000e-05
  -4.0000000e-05
  -5.0000000e-05
  -5.0000000e-05
  -4.0000000e-05
  -4.0000000e-05
  -4.0000000e-05
  -3.0000000e-05
  -1.0000000e-05
  -2.0000000e-05
  -3.0000000e-05
  -3.0000000e-05
  -2.0000000e-05
  -2.0000000e-05
  -0.0000000e+00
  -0.0000000e+00
  -1.0000000e-05
  -1.0000000e-05
  -0.0000000e+00
   2.0000000e-05
   2.0000000e-05
   1.0000000e-05
   1.0000000e-05
   0.0000000e+00
   1.0000000e-05
   3.0000000e-05
   2.0000000e-05
   1.0000000e-05
  -1.0000000e-05
  -1.0000000e-05
  -1.0000000e-05
  -1.0000000e-05
  -1.0000000e-05
  -2.0000000e-05
  -2.0000000e-05
  -3.0000000e-05
  -3.0000000e-05
  -2.0000000e-05
  -4.0000000e-05
  -4.0000000e-05
  -4.0000000e-05
  -4.0000000e-05
  -3.0000000e-05
  -4.0000000e-05
  -4.0000000e-05
  -4.0000000e-05
  -4.0000000e-05
  -4.0000000e-05
  -5.0000000e-05
  -5.0000000e-05
  -6.0000000e-05
  -6.0000000e-05
  -5.0000000e-05
  -5.0000000e-05
  -4.0000000e-05
  -5.0000000e-05
  -4.0000000e-05
  -4.0000000e-05
  -4.0000000e-05
  -3.0000000e-05
  -3.0000000e-05
  -2.0000000e-05
  -2.0000000e-05
  -3.0000000e-05
  -3.0000000e-05
  -4.0000000e-05
  -4.0000000e-05
  -2.0000000e-05
  -3.0000000e-05
  -3.0000000e-05
  -3.0000000e-05
  -2.0000000e-05
  -2.0000000e-05
  -2.0000000e-05
  -3.0000000e-05
  -3.0000000e-05
  -4.0000000e-05
  -3.0000000e-05
  -2.0000000e-05
  -3.0000000e-05
  -4.0000000e-05
  -5.0000000e-05
  -4.0000000e-05
  -5.0000000e-05
  -6.0000000e-05
  -5.0000000e-05
  -6.0000000e-05
  -7.0000000e-05
  -6.0000000e-05
  -6.0000000e-05
  -6.0000000e-05
  -6.0000000e-05
  -7.0000000e-05
  -7.0000000e-05
  -7.0000000e-05
  -7.0000000e-05
  -5.0000000e-05
  -5.0000000e-05
  -4.0000000e-05
  -4.0000000e-05
  -5.0000000e-05
  -4.0000000e-05
  -4.0000000e-05
  -2.0000000e-05
  -2.0000000e-05
  -3.0000000e-05
  -1.0000000e-05
  -1.0000000e-05
   0.0000000e+00
   2.0000000e-05
   2.0000000e-05
   1.0000000e-05
   2.0000000e-05
   3.0000000e-05
   4.0000000e-05
   5.0000000e-05
   5.0000000e-05
   3.0000000e-05
   2.0000000e-05
   3.0000000e-05
   3.0000000e-05
   4.0000000e-05
   4.0000000e-05
   2.0000000e-05
   1.0000000e-05
   1.0000000e-05
   2.0000000e-05
   1.0000000e-05
  -0.0000000e+00
  -1.0000000e-05
  -1.0000000e-05
  -2.0000000e-05
  -1.0000000e-05
  -2.0000000e-05
  -4.0000000e-05
  -5.0000000e-05
  -5.0000000e-05
  -6.0000000e-05
  -5.0000000e-05
  -4.0000000e-05
  -6.0000000e-05
  -6.0000000e-05
  -5.0000000e-05
  -5.0000000e-05
  -4.0000000e-05
  -5.0000000e-05
  -4.0000000e-05
  -3.0000000e-05
  -4.0000000e-05
  -3.0000000e-05
  -2.0000000e-05
  -4.0000000e-05
  -3.0000000e-05
  -2.0000000e-05
  -1.0000000e-05
  -1.0000000e-05
  -1.0000000e-05
  -1.0000000e-05
  -1.0000000e-05
  -0.0000000e+00
   1.0000000e-05
   1.0000000e-05
   1.0000000e-05
   0.0000000e+00
  -1.0000000e-05
  -1.0000000e-05
  -1.0000000e-05
  -1.0000000e-05
  -1.0000000e-05
  -2.0000000e-05
  -3.0000000e-05
  -4.0000000e-05
  -4.0000000e-05
  -3.0000000e-05
  -4.0000000e-05
  -4.0000000e-05
  -4.0000000e-05
  -4.0000000e-05
  -4.0000000e-05
  -4.0000000e-05
  -5.0000000e-05
  -6.0000000e-05
  -6.0000000e-05
  -5.0000000e-05
  -4.0000000e-05
  -5.0000000e-05
  -3.0000000e-05
  -4.0000000e-05
  -4.0000000e-05
  -3.0000000e-05
  -3.0000000e-05
  -2.0000000e-05
  -1.0000000e-05
   0.0000000e+00
  -1.0000000e-05
   0.0000000e+00
   2.0000000e-05
   1.0000000e-05
   3.0000000e-05
   4.0000000e-05
   4.0000000e-05
   6.0000000e-05
   4.0000000e-05
   5.0000000e-05
   6.0000000e-05
   6.0000000e-05
   7.0000000e-05
   6.0000000e-05
   4.0000000e-05
   5.0000000e-05
   4.0000000e-05
   5.0000000e-05
   4.0000000e-05
   4.0000000e-05
   3.0000000e-05
   3.0000000e-05
   3.0000000e-05
   2.0000000e-05
   2.0000000e-05
   0.0000000e+00
  -0.0000000e+00
  -1.0000000e-05
  -4.0000000e-05
  -4.0000000e-05
  -4.0000000e-05
  -5.0000000e-05
  -5.0000000e-05
  -6.0000000e-05
  -7.0000000e-05
  -8.0000000e-05
  -7.0000000e-05
  -6.0000000e-05
  -7.0000000e-05
  -7.0000000e-05
  -7.0000000e-05
  -7.0000000e-05
  -7.0000000e-05
  -8.0000000e-05
  -7.0000000e-05
  -7.0000000e-05
  -7.0000000e-05
  -6.0000000e-05
  -6.0000000e-05
  -4.0000000e-05
  -3.0000000e-05
  -3.0000000e-05
  -4.0000000e-05
  -3.0000000e-05
  -3.0000000e-05
  -1.0000000e-05
   0.0000000e+00
   1.0000000e-05
   1.0000000e-05
  -1.0000000e-05
  -0.0000000e+00
  -0.0000000e+00
   2.0000000e-05
   2.0000000e-05
   1.0000000e-05
   1.0000000e-05
   0.0000000e+00
   0.0000000e+00
  -0.0000000e+00
  -1.0000000e-05
  -1.0000000e-05
  -2.0000000e-05
  -1.0000000e-05
  -2.0000000e-05
  -2.0000000e-05
  -2.0000000e-05
  -4.0000000e-05
  -5.0000000e-05
  -5.0000000e-05
  -5.0000000e-05
  -5.0000000e-05
  -4.0000000e-05
  -5.0000000e-05
  -6.0000000e-05
  -7.0000000e-05
  -6.0000000e-05
  -5.0000000e-05
  -6.0000000e-05
  -4.0000000e-05
  -6.0000000e-05
  -6.0000000e-05
  -5.0000000e-05
  -6.0000000e-05
  -5.0000000e-05
  -4.0000000e-05
  -4.0000000e-05
  -4.0000000e-05
  -5.0000000e-05
  -5.0000000e-05
  -5.0000000e-05
  -4.0000000e-05
  -4.0000000e-05
  -4.0000000e-05
  -4.0000000e-05
  -5.0000000e-05
  -5.0000000e-05
  -5.0000000e-05
  -4.0000000e-05
  -4.0000000e-05
  -3.0000000e-05
  -3.0000000e-05
  -5.0000000e-05
  -4.0000000e-05
  -4.0000000e-05
  -4.0000000e-05
  -3.0000000e-05
  -5.0000000e-05
  -4.0000000e-05
  -4.0000000e-05
  -3.0000000e-05
  -3.0000000e-05
  -4.0000000e-05
  -4.0000000e-05
  -4.0000000e-05
  -3.0000000e-05
  -1.0000000e-05
  -0.0000000e+00
  -0.0000000e+00
  -1.0000000e-05
  -0.0000000e+00
  -0.0000000e+00
   0.0000000e+00
   2.0000000e-05
   1.0000000e-05
   1.0000000e-05
   0.0000000e+00
   2.0000000e-05
   3.0000000e-05
   2.0000000e-05
   3.0000000e-05
   3.0000000e-05
   2.0000000e-05
   3.0000000e-05
   5.0000000e-05
   4.0000000e-05
   3.0000000e-05
   3.0000000e-05
   2.0000000e-05
   2.0000000e-05
   2.0000000e-05
   1.0000000e-05
   1.0000000e-05
   0.0000000e+00
  -1.0000000e-05
  -2.0000000e-05
  -2.0000000e-05
  -3.0000000e-05
  -4.0000000e-05
  -4.0000000e-05
  -4.0000000e-05
  -5.0000000e-05
  -6.0000000e-05
  -6.0000000e-05
  -7.0000000e-05
  -8.0000000e-05
  -8.0000000e-05
  -9.0000000e-05
  -9.0000000e-05
  -1.0000000e-04
  -1.0000000e-04
  -8.0000000e-05
  -9.0000000e-05
  -8.0000000e-05
  -8.0000000e-05
  -8.0000000e-05
  -6.0000000e-05
  -5.0000000e-05
  -4.0000000e-05
  -4.0000000e-05
  -4.0000000e-05
  -2.0000000e-05
  -2.0000000e-05
  -2.0000000e-05
  -1.0000000e-05
   1.0000000e-05
   1.0000000e-05
   1.0000000e-05
   1.0000000e-05
   2.0000000e-05
   2.0000000e-05
   2.0000000e-05
   2.0000000e-05
   3.0000000e-05
   2.0000000e-05
   1.0000000e-05
   1.0000000e-05
   1.0000000e-05
   1.0000000e-05
  -0.0000000e+00
   1.0000000e-05
  -0.0000000e+00
  -2.0000000e-05
  -2.0000000e-05
  -3.0000000e-05
  -3.0000000e-05
  -3.0000000e-05
  -4.0000000e-05
  -4.0000000e-05
  -5.0000000e-05
  -6.0000000e-05
  -5.0000000e-05
  -5.0000000e-05
  -6.0000000e-05
  -6.0000000e-05
  -6.0000000e-05
  -7.0000000e-05
  -7.0000000e-05
  -7.0000000e-05
  -6.0000000e-05
  -6.0000000e-05
  -6.0000000e-05
  -6.0000000e-05
  -7.0000000e-05
  -7.0000000e-05
  -5.0000000e-05
  -4.0000000e-05
  -4.0000000e-05
  -4.0000000e-05
  -5.0000000e-05
  -5.0000000e-05
  -4.0000000e-05
  -3.0000000e-05
  -2.0000000e-05
  -3.0000000e-05
  -3.0000000e-05
  -2.0000000e-05
  -2.0000000e-05
  -2.0000000e-05
  -1.0000000e-05
  -2.0000000e-05
  -3.0000000e-05
  -3.0000000e-05
  -3.0000000e-05
  -3.0000000e-05
  -2.0000000e-05
  -2.0000000e-05
  -3.0000000e-05
  -2.0000000e-05
  -3.0000000e-05
  -4.0000000e-05
  -4.0000000e-05
  -4.0000000e-05
  -4.0000000e-05
  -4.0000000e-05
  -5.0000000e-05
  -4.0000000e-05
  -5.0000000e-05
  -7.0000000e-05
  -7.0000000e-05
  -7.0000000e-05
  -7.0000000e-05
  -6.0000000e-05
  -6.0000000e-05
  -6.0000000e-05
  -5.0000000e-05
  -5.0000000e-05
  -4.0000000e-05
  -3.0000000e-05
  -4.0000000e-05
  -3.0000000e-05
  -2.0000000e-05
  -3.0000000e-05
  -2.0000000e-05
  -1.0000000e-05
   1.0000000e-05
   0.0000000e+00
  -1.0000000e-05
   0.0000000e+00
   2.0000000e-05
   2.0000000e-05
   3.0000000e-05
   4.0000000e-05
   3.0000000e-05
   3.0000000e-05
   3.0000000e-05
   4.0000000e-05
   3.0000000e-05
   1.0000000e-05
   2.0000000e-05
   2.0000000e-05
   0.0000000e+00
  -0.0000000e+00
  -1.0000000e-05
  -2.0000000e-05
  -3.0000000e-05
  -2.0000000e-05
  -4.0000000e-05
  -5.0000000e-05
  -4.0000000e-05
  -5.0000000e-05
  -4.0000000e-05
  -4.0000000e-05
  -5.0000000e-05
  -6.0000000e-05
  -6.0000000e-05
  -6.0000000e-05
  -6.0000000e-05
  -6.0000000e-05
  -6.0000000e-05
  -7.0000000e-05
  -8.0000000e-05
  -7.0000000e-05
  -6.0000000e-05
  -7.0000000e-05
  -4.0000000e-05
  -2.0000000e-05
  -3.0000000e-05
  -1.0000000e-05
  -2.0000000e-05
  -1.0000000e-05
  -1.0000000e-05
   0.0000000e+00
   2.0000000e-05
   2.0000000e-05
   1.0000000e-05
   0.0000000e+00
  -2.0000000e-05
  -1.0000000e-05
   2.0000000e-05
   3.0000000e-05
   1.0000000e-05
  -0.0000000e+00
  -1.0000000e-05
  -0.0000000e+00
   0.0000000e+00
   0.0000000e+00
  -0.0000000e+00
  -2.0000000e-05
  -3.0000000e-05
  -2.0000000e-05
  -2.0000000e-05
  -3.0000000e-05
  -4.0000000e-05
  -5.0000000e-05
  -6.0000000e-05
  -7.0000000e-05
  -6.0000000e-05
  -6.0000000e-05
  -7.0000000e-05
  -7.0000000e-05
  -7.0000000e-05
  -8.0000000e-05
  -7.0000000e-05
  -6.0000000e-05
  -5.0000000e-05
  -6.0000000e-05
  -5.0000000e-05
  -5.0000000e-05
  -4.0000000e-05
  -2.0000000e-05
  -3.0000000e-05
  -3.0000000e-05
  -3.0000000e-05
  -4.0000000e-05
  -2.0000000e-05
   0.0000000e+00
   0.0000000e+00
   1.0000000e-05
   0.0000000e+00
   0.0000000e+00
   2.0000000e-05
   3.0000000e-05
   3.0000000e-05
   4.0000000e-05
   1.0000000e-05
   2.0000000e-05
   1.0000000e-05
   0.0000000e+00
   2.0000000e-05
   1.0000000e-05
   1.0000000e-05
   0.0000000e+00
  -2.0000000e-05
  -0.0000000e+00
  -1.0000000e-05
  -3.0000000e-05
  -2.0000000e-05
  -3.0000000e-05
  -3.0000000e-05
  -3.0000000e-05
  -3.0000000e-05
  -4.0000000e-05
  -4.0000000e-05
  -4.0000000e-05
  -5.0000000e-05
  -5.0000000e-05
  -5.0000000e-05
  -5.0000000e-05
  -5.0000000e-05
  -5.0000000e-05
  -4.0000000e-05
  -4.0000000e-05
  -2.0000000e-05
  -2.0000000e-05
  -3.0000000e-05
  -2.0000000e-05
  -1.0000000e-05
  -1.0000000e-05
  -1.0000000e-05
  -1.0000000e-05
  -0.0000000e+00
  -1.0000000e-05
  -1.0000000e-05
   1.0000000e-05
   0.0000000e+00
   1.0000000e-05
   0.0000000e+00
   2.0000000e-05
   2.0000000e-05
   1.0000000e-05
   3.0000000e-05
   1.0000000e-05
   0.0000000e+00
   0.0000000e+00
   0.0000000e+00
   0.0000000e+00
   0.0000000e+00
  -2.0000000e-05
  -2.0000000e-05
  -3.0000000e-05
  -3.0000000e-05
  -3.0000000e-05
  -2.0000000e-05
  -2.0000000e-05
  -2.0000000e-05
  -4.0000000e-05
  -4.0000000e-05
  -4.0000000e-05
  -6.0000000e-05
  -5.0000000e-05
  -5.0000000e-05
  -5.0000000e-05
  -6.0000000e-05
  -6.0000000e-05
  -5.0000000e-05
  -5.0000000e-05
  -6.0000000e-05
  -5.0000000e-05
  -5.0000000e-05
  -5.0000000e-05
  -4.0000000e-05
  -3.0000000e-05
  -4.0000000e-05
  -4.0000000e-05
  -3.0000000e-05
  -2.0000000e-05
  -1.0000000e-05
  -1.0000000e-05
  -1.0000000e-05
  -1.0000000e-05
  -0.0000000e+00
  -1.0000000e-05
  -0.0000000e+00
  -1.0000000e-05
  -2.0000000e-05
  -0.0000000e+00
  -0.0000000e+00
  -0.0000000e+00
  -1.0000000e-05
  -2.0000000e-05
  -2.0000000e-05
  -1.0000000e-05
  -2.0000000e-05
  -2.0000000e-05
  -2.0000000e-05
  -3.0000000e-05
  -3.0000000e-05
  -4.0000000e-05
  -5.0000000e-05
  -6.0000000e-05
  -6.0000000e-05
  -7.0000000e-05
  -6.0000000e-05
  -6.0000000e-05
  -6.0000000e-05
  -6.0000000e-05
  -7.0000000e-05
  -6.0000000e-05
  -6.0000000e-05
  -6.0000000e-05
  -5.0000000e-05
  -5.0000000e-05
  -6.0000000e-05
  -5.0000000e-05
  -5.0000000e-05
  -5.0000000e-05
  -4.0000000e-05
  -2.0000000e-05
  -3.0000000e-05
  -3.0000000e-05
  -2.0000000e-05
  -1.0000000e-05
  -1.0000000e-05
  -0.0000000e+00
   0.0000000e+00
   0.0000000e+00
  -1.0000000e-05
   1.0000000e-05
   1.0000000e-05
   1.0000000e-05
   1.0000000e-05
  -0.0000000e+00
   0.0000000e+00
  -0.0000000e+00
  -1.0000000e-05
  -2.0000000e-05
  -4.0000000e-05
  -4.0000000e-05
  -4.0000000e-05
  -3.0000000e-05
  -4.0000000e-05
  -5.0000000e-05
  -3.0000000e-05
  -6.0000000e-05
  -7.0000000e-05
  -7.0000000e-05
  -7.0000000e-05
  -8.0000000e-05
  -8.0000000e-05
  -7.0000000e-05
  -9.0000000e-05
  -9.0000000e-05
  -1.0000000e-04
  -9.0000000e-05
  -6.0000000e-05
  -7.0000000e-05
  -6.0000000e-05
  -6.0000000e-05
  -6.0000000e-05
  -5.0000000e-05
  -3.0000000e-05
  -2.0000000e-05
  -3.0000000e-05
  -2.0000000e-05
  -3.0000000e-05
  -1.0000000e-05
  -1.0000000e-05
   0.0000000e+00
   1.0000000e-05
   2.0000000e-05
   1.0000000e-05
   2.0000000e-05
   4.0000000e-05
   4.0000000e-05
   4.0000000e-05
   3.0000000e-05
   3.0000000e-05
   3.0000000e-05
   4.0000000e-05
   5.0000000e-05
   3.0000000e-05
   2.0000000e-05
   0.0000000e+00
  -0.0000000e+00
   0.0000000e+00
   1.0000000e-05
  -0.0000000e+00
  -2.0000000e-05
  -2.0000000e-05
  -3.0000000e-05
  -2.0000000e-05
  -2.0000000e-05
  -3.0000000e-05
  -3.0000000e-05
  -4.0000000e-05
  -4.0000000e-05
  -5.0000000e-05
  -5.0000000e-05
  -5.0000000e-05
  -6.0000000e-05
  -7.0000000e-05
  -8.0000000e-05
  -6.0000000e-05
  -7.0000000e-05
  -7.0000000e-05
  -5.0000000e-05
  -5.0000000e-05
  -5.0000000e-05
  -4.0000000e-05
  -4.0000000e-05
  -3.0000000e-05
  -3.0000000e-05
  -3.0000000e-05
  -2.0000000e-05
  -1.0000000e-05
  -2.0000000e-05
  -3.0000000e-05
  -3.0000000e-05
  -4.0000000e-05
  -2.0000000e-05
  -2.0000000e-05
  -3.0000000e-05
  -1.0000000e-05
  -2.0000000e-05
  -1.0000000e-05
  -1.0000000e-05
  -1.0000000e-05
  -1.0000000e-05
  -1.0000000e-05
   0.0000000e+00
  -1.0000000e-05
  -1.0000000e-05
  -2.0000000e-05
  -1.0000000e-05
  -1.0000000e-05
  -2.0000000e-05
   0.0000000e+00
  -1.0000000e-05
  -2.0000000e-05
  -1.0000000e-05
  -1.0000000e-05
  -1.0000000e-05
  -0.0000000e+00
  -0.0000000e+00
   0.0000000e+00
   1.0000000e-05
   0.0000000e+00
  -1.0000000e-05
  -0.0000000e+00
   1.0000000e-05
   1.0000000e-05
   2.0000000e-05
   1.0000000e-05
   0.0000000e+00
  -0.0000000e+00
  -1.0000000e-05
   1.0000000e-05
  -0.0000000e+00
  -2.0000000e-05
  -2.0000000e-05
  -2.0000000e-05
  -3.0000000e-05
  -1.0000000e-05
  -2.0000000e-05
  -3.0000000e-05
  -3.0000000e-05
  -4.0000000e-05
  -3.0000000e-05
  -3.0000000e-05
  -4.0000000e-05
  -4.0000000e-05
  -6.0000000e-05
  -8.0000000e-05
  -9.0000000e-05
  -8.0000000e-05
  -8.0000000e-05
  -9.0000000e-05
  -8.0000000e-05
  -9.0000000e-05
  -9.0000000e-05
  -8.0000000e-05
  -8.0000000e-05
  -8.0000000e-05
  -8.0000000e-05
  -9.0000000e-05
  -8.0000000e-05
  -7.0000000e-05
  -7.0000000e-05
  -6.0000000e-05
  -7.0000000e-05
  -7.0000000e-05
  -6.0000000e-05
  -4.0000000e-05
  -3.0000000e-05
  -3.0000000e-05
  -3.0000000e-05
  -3.0000000e-05
  -3.0000000e-05
  -2.0000000e-05
  -1.0000000e-05
  -1.0000000e-05
   0.0000000e+00
  -0.0000000e+00
  -0.0000000e+00
   0.0000000e+00
  -1.0000000e-05
  -0.0000000e+00
   0.0000000e+00
  -0.0000000e+00
   0.0000000e+00
  -0.0000000e+00
  -0.0000000e+00
  -2.0000000e-05
  -2.0000000e-05
  -1.0000000e-05
  -2.0000000e-05
  -2.0000000e-05
  -3.0000000e-05
  -4.0000000e-05
  -4.0000000e-05
  -4.0000000e-05
  -4.0000000e-05
  -4.0000000e-05
  -5.0000000e-05
  -6.0000000e-05
  -6.0000000e-05
  -6.0000000e-05
  -6.0000000e-05
  -5.0000000e-05
  -6.0000000e-05
  -5.0000000e-05
  -6.0000000e-05
  -5.0000000e-05
  -4.0000000e-05
  -5.0000000e-05
  -3.0000000e-05
  -3.0000000e-05
  -2.0000000e-05
  -2.0000000e-05
  -2.0000000e-05
  -0.0000000e+00
  -1.0000000e-05
  -1.0000000e-05
   0.0000000e+00
   1.0000000e-05
   2.0000000e-05
   1.0000000e-05
   1.0000000e-05
   1.0000000e-05
   1.0000000e-05
   3.0000000e-05
   2.0000000e-05
   1.0000000e-05
  -0.0000000e+00
   0.0000000e+00
   1.0000000e-05
   1.0000000e-05
  -0.0000000e+00
  -2.0000000e-05
  -2.0000000e-05
  -2.0000000e-05
  -3.0000000e-05
  -4.0000000e-05
  -4.0000000e-05
  -6.0000000e-05
  -7.0000000e-05
  -6.0000000e-05
  -6.0000000e-05
  -6.0000000e-05
  -7.0000000e-05
  -9.0000000e-05
  -9.0000000e-05
  -9.0000000e-05
  -9.0000000e-05
  -7.0000000e-05
  -8.0000000e-05
  -8.0000000e-05
  -8.0000000e-05
  -8.0000000e-05
  -7.0000000e-05
  -7.0000000e-05
  -5.0000000e-05
  -6.0000000e-05
  -5.0000000e-05
  -4.0000000e-05
  -3.0000000e-05
  -1.0000000e-05
  -0.0000000e+00
   1.0000000e-05
   3.0000000e-05
   2.0000000e-05
   3.0000000e-05
   4.0000000e-05
   5.0000000e-05
   4.0000000e-05
   6.0000000e-05
   5.0000000e-05
   4.0000000e-05
   5.0000000e-05
   4.0000000e-05
   4.0000000e-05
   2.0000000e-05
   2.0000000e-05
   2.0000000e-05
   1.0000000e-05
   2.0000000e-05
   1.0000000e-05
   1.0000000e-05
  -1.0000000e-05
  -2.0000000e-05
  -2.0000000e-05
  -3.0000000e-05
  -4.0000000e-05
  -5.0000000e-05
  -6.0000000e-05
  -7.0000000e-05
  -8.0000000e-05
  -7.0000000e-05
  -9.0000000e-05
  -1.0000000e-04
  -9.0000000e-05
  -8.0000000e-05
  -8.0000000e-05
  -8.0000000e-05
  -8.0000000e-05
  -8.0000000e-05
  -8.0000000e-05
  -6.0000000e-05
  -6.0000000e-05
  -6.0000000e-05
  -5.0000000e-05
  -6.0000000e-05
  -5.0000000e-05
  -4.0000000e-05
  -3.0000000e-05
  -3.0000000e-05
  -2.0000000e-05
  -1.0000000e-05
  -2.0000000e-05
  -1.0000000e-05
  -1.0000000e-05
  -1.0000000e-05
  -0.0000000e+00
  -2.0000000e-05
  -2.0000000e-05
  -1.0000000e-05
  -1.0000000e-05
  -1.0000000e-05
  -1.0000000e-05
  -3.0000000e-05
  -3.0000000e-05
  -4.0000000e-05
  -3.0000000e-05
  -3.0000000e-05
  -5.0000000e-05
  -5.0000000e-05
  -5.0000000e-05
  -6.0000000e-05
  -5.0000000e-05
  -6.0000000e-05
  -5.0000000e-05
  -6.0000000e-05
  -6.0000000e-05
  -6.0000000e-05
  -5.0000000e-05
  -6.0000000e-05
  -6.0000000e-05
  -6.0000000e-05
  -7.0000000e-05
  -7.0000000e-05
  -5.0000000e-05
  -4.0000000e-05
  -4.0000000e-05
  -4.0000000e-05
  -3.0000000e-05
  -3.0000000e-05
  -2.0000000e-05
  -0.0000000e+00
  -0.0000000e+00
  -0.0000000e+00
   1.0000000e-05
   1.0000000e-05
   1.0000000e-05
   2.0000000e-05
   2.0000000e-05
   1.0000000e-05
   1.0000000e-05
   2.0000000e-05
   2.0000000e-05
   2.0000000e-05
   1.0000000e-05
   1.0000000e-05
   1.0000000e-05
   1.0000000e-05
   1.0000000e-05
  -1.0000000e-05
  -3.0000000e-05
  -4.0000000e-05
  -2.0000000e-05
  -2.0000000e-05
  -2.0000000e-05
  -4.0000000e-05
  -5.0000000e-05
  -5.0000000e-05
  -6.0000000e-05
  -6.0000000e-05
  -5.0000000e-05
  -5.0000000e-05
  -5.0000000e-05
  -6.0000000e-05
  -5.0000000e-05
  -5.0000000e-05
  -4.0000000e-05
  -5.0000000e-05
  -5.0000000e-05
  -3.0000000e-05
  -4.0000000e-05
  -1.0000000e-05
  -1.0000000e-05
  -2.0000000e-05
  -3.0000000e-05
  -3.0000000e-05
  -1.0000000e-05
   1.0000000e-05
  -0.0000000e+00
  -0.0000000e+00
  -0.0000000e+00
  -1.0000000e-05
  -0.0000000e+00
   0.0000000e+00
   0.0000000e+00
   0.0000000e+00
   0.0000000e+00
  -1.0000000e-05
   0.0000000e+00
  -0.0000000e+00
  -1.0000000e-05
  -0.0000000e+00
  -1.0000000e-05
  -3.0000000e-05
  -2.0000000e-05
  -2.0000000e-05
  -3.0000000e-05
  -4.0000000e-05
  -5.0000000e-05
  -4.0000000e-05
  -5.0000000e-05
  -5.0000000e-05
  -4.0000000e-05
  -6.0000000e-05
  -6.0000000e-05
  -6.0000000e-05
  -5.0000000e-05
  -6.0000000e-05
  -6.0000000e-05
  -5.0000000e-05
  -5.0000000e-05
  -5.0000000e-05
  -6.0000000e-05
  -4.0000000e-05
  -5.0000000e-05
  -5.0000000e-05
  -5.0000000e-05
  -4.0000000e-05
  -3.0000000e-05
  -2.0000000e-05
   0.0000000e+00
   1.0000000e-05
   1.0000000e-05
   2.0000000e-05
   2.0000000e-05
   3.0000000e-05
   4.0000000e-05
   3.0000000e-05
   3.0000000e-05
   4.0000000e-05
   3.0000000e-05
   2.0000000e-05
   4.0000000e-05
   3.0000000e-05
   3.0000000e-05
   3.0000000e-05
   3.0000000e-05
   3.0000000e-05
   3.0000000e-05
   2.0000000e-05
   3.0000000e-05
   2.0000000e-05
   1.0000000e-05
  -0.0000000e+00
  -2.0000000e-05
  -1.0000000e-05
  -3.0000000e-05
  -4.0000000e-05
  -4.0000000e-05
  -5.0000000e-05
  -5.0000000e-05
  -5.0000000e-05
  -4.0000000e-05
  -5.0000000e-05
  -5.0000000e-05
  -4.0000000e-05
  -4.0000000e-05
  -3.0000000e-05
  -3.0000000e-05
  -4.0000000e-05
  -3.0000000e-05
  -4.0000000e-05
  -3.0000000e-05
  -1.0000000e-05
  -2.0000000e-05
  -2.0000000e-05
  -1.0000000e-05
  -1.0000000e-05
   0.0000000e+00
   1.0000000e-05
   2.0000000e-05
   2.0000000e-05
   3.0000000e-05
   3.0000000e-05
   3.0000000e-05
   3.0000000e-05
   1.0000000e-05
   0.0000000e+00
  -0.0000000e+00
  -1.0000000e-05
  -2.0000000e-05
  -1.0000000e-05
  -1.0000000e-05
  -2.0000000e-05
  -4.0000000e-05
  -4.0000000e-05
  -4.0000000e-05
  -4.0000000e-05
  -3.0000000e-05
  -3.0000000e-05
  -4.0000000e-05
  -6.0000000e-05
  -7.0000000e-05
  -6.0000000e-05
  -6.0000000e-05
  -7.0000000e-05
  -7.0000000e-05
  -7.0000000e-05
  -8.0000000e-05
  -8.0000000e-05
  -8.0000000e-05
  -8.0000000e-05
  -7.0000000e-05
  -6.0000000e-05
  -5.0000000e-05
  -5.0000000e-05
  -4.0000000e-05
  -4.0000000e-05
  -3.0000000e-05
  -1.0000000e-05
  -1.0000000e-05
  -1.0000000e-05
  -1.0000000e-05
   0.0000000e+00
   0.0000000e+00
   2.0000000e-05
   3.0000000e-05
   2.0000000e-05
   2.0000000e-05
   3.0000000e-05
   3.0000000e-05
   4.0000000e-05
   4.0000000e-05
   4.0000000e-05
   4.0000000e-05
   3.0000000e-05
   2.0000000e-05
   1.0000000e-05
   0.0000000e+00
   0.0000000e+00
  -0.0000000e+00
  -1.0000000e-05
  -3.0000000e-05
  -4.0000000e-05
  -4.0000000e-05
  -4.0000000e-05
  -4.0000000e-05
  -5.0000000e-05
  -5.0000000e-05
  -6.0000000e-05
  -6.0000000e-05
  -6.0000000e-05
  -6.0000000e-05
  -6.0000000e-05
  -7.0000000e-05
  -7.0000000e-05
  -7.0000000e-05
  -7.0000000e-05
  -6.0000000e-05
  -5.0000000e-05
  -5.0000000e-05
  -3.0000000e-05
  -2.0000000e-05
  -3.0000000e-05
  -0.0000000e+00
   0.0000000e+00
  -0.0000000e+00
   0.0000000e+00
   1.0000000e-05
   2.0000000e-05
   4.0000000e-05
   3.0000000e-05
   3.0000000e-05
   3.0000000e-05
   2.0000000e-05
   3.0000000e-05
   4.0000000e-05
   4.0000000e-05
   3.0000000e-05
   2.0000000e-05
   2.0000000e-05
   1.0000000e-05
   1.0000000e-05
   1.0000000e-05
   1.0000000e-05
   2.0000000e-05
   1.0000000e-05
   0.0000000e+00
   0.0000000e+00
  -1.0000000e-05
  -2.0000000e-05
  -3.0000000e-05
  -3.0000000e-05
  -3.0000000e-05
  -4.0000000e-05
  -4.0000000e-05
  -4.0000000e-05
  -4.0000000e-05
  -4.0000000e-05
  -3.0000000e-05
  -4.0000000e-05
  -3.0000000e-05
  -4.0000000e-05
  -5.0000000e-05
  -4.0000000e-05
  -4.0000000e-05
  -4.0000000e-05
  -4.0000000e-05
  -6.0000000e-05
  -5.0000000e-05
  -4.0000000e-05
  -2.0000000e-05
  -3.0000000e-05
  -4.0000000e-05
  -3.0000000e-05
  -4.0000000e-05
  -3.0000000e-05
  -2.0000000e-05
  -2.0000000e-05
  -3.0000000e-05
  -3.0000000e-05
  -1.0000000e-05
  -2.0000000e-05
  -3.0000000e-05
  -2.0000000e-05
  -4.0000000e-05
  -4.0000000e-05
  -2.0000000e-05
  -3.0000000e-05
  -2.0000000e-05
  -3.0000000e-05
  -4.0000000e-05
  -4.0000000e-05
  -3.0000000e-05
  -3.0000000e-05
  -2.0000000e-05
  -2.0000000e-05
  -2.0000000e-05
  -5.0000000e-05
  -4.0000000e-05
  -5.0000000e-05
  -4.0000000e-05
  -3.0000000e-05
  -4.0000000e-05
  -3.0000000e-05
  -2.0000000e-05
  -2.0000000e-05
  -1.0000000e-05
  -1.0000000e-05
  -1.0000000e-05
  -1.0000000e-05
  -0.0000000e+00
   1.0000000e-05
   1.0000000e-05
   1.0000000e-05
   1.0000000e-05
   1.0000000e-05
   1.0000000e-05
   2.0000000e-05
   3.0000000e-05
   3.0000000e-05
   3.0000000e-05
   3.0000000e-05
   3.0000000e-05
   4.0000000e-05
   3.0000000e-05
   2.0000000e-05
   1.0000000e-05
   1.0000000e-05
   1.0000000e-05
   1.0000000e-05
   1.0000000e-05
   1.0000000e-05
   0.0000000e+00
  -2.0000000e-05
  -1.0000000e-05
  -2.0000000e-05
  -4.0000000e-05
  -3.0000000e-05
  -4.0000000e-05
  -5.0000000e-05
  -6.0000000e-05
  -6.0000000e-05
  -7.0000000e-05
  -8.0000000e-05
  -7.0000000e-05
  -9.0000000e-05
  -8.0000000e-05
  -8.0000000e-05
  -9.0000000e-05
  -8.0000000e-05
  -9.0000000e-05
  -8.0000000e-05
  -8.0000000e-05
  -8.0000000e-05
  -7.0000000e-05
  -6.0000000e-05
  -6.0000000e-05
  -5.0000000e-05
  -4.0000000e-05
  -4.0000000e-05
  -3.0000000e-05
  -3.0000000e-05
  -2.0000000e-05
  -1.0000000e-05
  -1.0000000e-05
  -1.0000000e-05
   1.0000000e-05
   0.0000000e+00
   1.0000000e-05
   2.0000000e-05
   1.0000000e-05
   1.0000000e-05
   1.0000000e-05
   0.0000000e+00
   2.0000000e-05
   1.0000000e-05
   0.0000000e+00
  -1.0000000e-05
  -2.0000000e-05
  -1.0000000e-05
  -1.0000000e-05
  -1.0000000e-05
  -2.0000000e-05
  -2.0000000e-05
  -3.0000000e-05
  -4.0000000e-05
  -4.0000000e-05
  -5.0000000e-05
  -5.0000000e-05
  -5.0000000e-05
  -5.0000000e-05
  -6.0000000e-05
  -6.0000000e-05
  -6.0000000e-05
  -6.0000000e-05
  -5.0000000e-05
  -4.0000000e-05
  -3.0000000e-05
  -2.0000000e-05
  -2.0000000e-05
  -2.0000000e-05
  -2.0000000e-05
  -1.0000000e-05
  -0.0000000e+00
   0.0000000e+00
  -0.0000000e+00
   1.0000000e-05
   1.0000000e-05
   1.0000000e-05
   2.0000000e-05
   3.0000000e-05
   4.0000000e-05
   3.0000000e-05
   3.0000000e-05
   5.0000000e-05
   3.0000000e-05
   1.0000000e-05
   2.0000000e-05
   2.0000000e-05
  -0.0000000e+00
  -1.0000000e-05
   0.0000000e+00
  -0.0000000e+00
  -1.0000000e-05
  -1.0000000e-05
  -2.0000000e-05
  -3.0000000e-05
  -4.0000000e-05
  -3.0000000e-05
  -4.0000000e-05
  -5.0000000e-05
  -5.0000000e-05
  -5.0000000e-05
  -5.0000000e-05
  -5.0000000e-05
  -5.0000000e-05
  -5.0000000e-05
  -6.0000000e-05
  -4.0000000e-05
  -4.0000000e-05
  -3.0000000e-05
  -4.0000000e-05
  -6.0000000e-05
  -4.0000000e-05
  -4.0000000e-05
  -3.0000000e-05
  -1.0000000e-05
  -1.0000000e-05
  -0.0000000e+00
   0.0000000e+00
   0.0000000e+00
   1.0000000e-05
   3.0000000e-05
   4.0000000e-05
   4.0000000e-05
   4.0000000e-05
   3.0000000e-05
   3.0000000e-05
   2.0000000e-05
   2.0000000e-05
   1.0000000e-05
   0.0000000e+00
   1.0000000e-05
   1.0000000e-05
   2.0000000e-05
   1.0000000e-05
  -0.0000000e+00
  -0.0000000e+00
  -2.0000000e-05
  -0.0000000e+00
   0.0000000e+00
  -0.0000000e+00
   0.0000000e+00
  -1.0000000e-05
  -2.0000000e-05
  -3.0000000e-05
  -5.0000000e-05
  -4.0000000e-05
  -5.0000000e-05
  -5.0000000e-05
  -4.0000000e-05
  -4.0000000e-05
  -4.0000000e-05
  -4.0000000e-05
  -4.0000000e-05
  -4.0000000e-05
  -3.0000000e-05
  -1.0000000e-05
   0.0000000e+00
   1.0000000e-05
  -1.0000000e-05
  -1.0000000e-05
   0.0000000e+00
  -0.0000000e+00
   0.0000000e+00
   1.0000000e-05
   1.0000000e-05
   1.0000000e-05
   3.0000000e-05
   4.0000000e-05
   3.0000000e-05
   3.0000000e-05
   3.0000000e-05
   3.0000000e-05
   4.0000000e-05
   4.0000000e-05
   5.0000000e-05
   3.0000000e-05
   3.0000000e-05
   2.0000000e-05
   2.0000000e-05
   1.0000000e-05
  -1.0000000e-05
  -1.0000000e-05
  -2.0000000e-05
   0.0000000e+00
  -0.0000000e+00
  -2.0000000e-05
  -3.0000000e-05
  -5.0000000e-05
  -5.0000000e-05
  -4.0000000e-05
  -5.0000000e-05
  -3.0000000e-05
  -5.0000000e-05
  -8.0000000e-05
  -7.0000000e-05
  -7.0000000e-05
  -7.0000000e-05
  -6.0000000e-05
  -6.0000000e-05
  -6.0000000e-05
  -7.0000000e-05
  -7.0000000e-05
  -6.0000000e-05
  -6.0000000e-05
  -5.0000000e-05
  -6.0000000e-05
  -4.0000000e-05
  -3.0000000e-05
  -3.0000000e-05
  -2.0000000e-05
  -2.0000000e-05
  -3.0000000e-05
  -1.0000000e-05
  -1.0000000e-05
  -1.0000000e-05
  -1.0000000e-05
  -1.0000000e-05
  -1.0000000e-05
  -0.0000000e+00
  -1.0000000e-05
  -1.0000000e-05
  -1.0000000e-05
  -2.0000000e-05
  -1.0000000e-05
  -1.0000000e-05
  -2.0000000e-05
  -2.0000000e-05
  -3.0000000e-05
  -4.0000000e-05
  -5.0000000e-05
  -6.0000000e-05
  -6.0000000e-05
  -6.0000000e-05
  -5.0000000e-05
  -6.0000000e-05
  -6.0000000e-05
  -5.0000000e-05
  -6.0000000e-05
  -6.0000000e-05
  -7.0000000e-05
  -7.0000000e-05
  -6.0000000e-05
  -5.0000000e-05
  -5.0000000e-05
  -7.0000000e-05
  -6.0000000e-05
  -6.0000000e-05
  -5.0000000e-05
  -3.0000000e-05
  -3.0000000e-05
  -3.0000000e-05
  -3.0000000e-05
  -0.0000000e+00
  -1.0000000e-05
   0.0000000e+00
   2.0000000e-05
  -0.0000000e+00
   0.0000000e+00
   1.0000000e-05
   2.0000000e-05
   1.0000000e-05
  -0.0000000e+00
   0.0000000e+00
  -1.0000000e-05
  -1.0000000e-05
  -1.0000000e-05
  -1.0000000e-05
  -3.0000000e-05
  -4.0000000e-05
  -4.0000000e-05
  -3.0000000e-05
  -4.0000000e-05
  -3.0000000e-05
  -5.0000000e-05
  -6.0000000e-05
  -6.0000000e-05
  -6.0000000e-05
  -6.0000000e-05
  -7.0000000e-05
  -8.0000000e-05
  -9.0000000e-05
  -9.0000000e-05
  -1.0000000e-04
  -1.0000000e-04
  -8.0000000e-05
  -9.0000000e-05
  -9.0000000e-05
  -8.0000000e-05
  -8.0000000e-05
  -6.0000000e-05
  -6.0000000e-05
  -5.0000000e-05
  -4.0000000e-05
  -3.0000000e-05
  -3.0000000e-05
  -2.0000000e-05
  -2.0000000e-05
  -1.0000000e-05
   1.0000000e-05
   2.0000000e-05
   3.0000000e-05
   3.0000000e-05
   2.0000000e-05
   3.0000000e-05
   4.0000000e-05
   4.0000000e-05
   4.0000000e-05
   3.0000000e-05
   3.0000000e-05
   4.0000000e-05
   3.0000000e-05
   3.0000000e-05
   4.0000000e-05
   3.0000000e-05
   2.0000000e-05
   2.0000000e-05
   1.0000000e-05
   1.0000000e-05
  -0.0000000e+00
  -1.0000000e-05
  -2.0000000e-05
  -3.0000000e-05
  -3.0000000e-05
  -3.0000000e-05
  -4.0000000e-05
  -4.0000000e-05
  -5.0000000e-05
  -5.0000000e-05
  -5.0000000e-05
  -4.0000000e-05
  -4.0000000e-05
  -4.0000000e-05
  -4.0000000e-05
  -3.0000000e-05
  -4.0000000e-05
  -3.0000000e-05
  -3.0000000e-05
  -4.0000000e-05
  -2.0000000e-05
  -1.0000000e-05
   2.0000000e-05
   2.0000000e-05
   1.0000000e-05
   2.0000000e-05
   1.0000000e-05
   2.0000000e-05
   4.0000000e-05
   5.0000000e-05
   3.0000000e-05
   3.0000000e-05
   2.0000000e-05
   1.0000000e-05
   1.0000000e-05
   1.0000000e-05
   1.0000000e-05
   0.0000000e+00
  -2.0000000e-05
  -2.0000000e-05
  -2.0000000e-05
  -4.0000000e-05
  -5.0000000e-05
  -6.0000000e-05
  -7.0000000e-05
  -7.0000000e-05
  -6.0000000e-05
  -8.0000000e-05
  -6.0000000e-05
  -8.0000000e-05
  -1.0000000e-04
  -9.0000000e-05
  -9.0000000e-05
  -9.0000000e-05
  -8.0000000e-05
  -8.0000000e-05
  -1.0000000e-04
  -9.0000000e-05
  -9.0000000e-05
  -7.0000000e-05
  -7.0000000e-05
  -6.0000000e-05
  -4.0000000e-05
  -4.0000000e-05
  -3.0000000e-05
  -2.0000000e-05
  -2.0000000e-05
  -1.0000000e-05
  -1.0000000e-05
   1.0000000e-05
   1.0000000e-05
   2.0000000e-05
   3.0000000e-05
   1.0000000e-05
   2.0000000e-05
   1.0000000e-05
   3.0000000e-05
   5.0000000e-05
   4.0000000e-05
   4.0000000e-05
   4.0000000e-05
   2.0000000e-05
   2.0000000e-05
   3.0000000e-05
   3.0000000e-05
   2.0000000e-05
   0.0000000e+00
  -1.0000000e-05
  -0.0000000e+00
  -1.0000000e-05
  -3.0000000e-05
  -3.0000000e-05
  -4.0000000e-05
  -6.0000000e-05
  -5.0000000e-05
  -6.0000000e-05
  -7.0000000e-05
  -7.0000000e-05
  -9.0000000e-05
  -8.0000000e-05
  -8.0000000e-05
  -1.0000000e-04
  -9.0000000e-05
  -9.0000000e-05
  -9.0000000e-05
  -9.0000000e-05
  -9.0000000e-05
  -8.0000000e-05
  -9.0000000e-05
  -7.0000000e-05
  -6.0000000e-05
  -5.0000000e-05
  -5.0000000e-05
  -5.0000000e-05
  -3.0000000e-05
  -2.0000000e-05
  -0.0000000e+00
   1.0000000e-05
   0.0000000e+00
   0.0000000e+00
   0.0000000e+00
   1.0000000e-05
   3.0000000e-05
   3.0000000e-05
   1.0000000e-05
   2.0000000e-05
   1.0000000e-05
   1.0000000e-05
   2.0000000e-05
   2.0000000e-05
   0.0000000e+00
   0.0000000e+00
  -1.0000000e-05
   0.0000000e+00
   1.0000000e-05
  -2.0000000e-05
  -2.0000000e-05
  -2.0000000e-05
  -3.0000000e-05
  -4.0000000e-05
  -4.0000000e-05
  -4.0000000e-05
  -6.0000000e-05
  -6.0000000e-05
  -7.0000000e-05
  -7.0000000e-05
  -6.0000000e-05
  -8.0000000e-05
  -7.0000000e-05
  -6.0000000e-05
  -7.0000000e-05
  -5.0000000e-05
  -6.0000000e-05
  -7.0000000e-05
  -5.0000000e-05
  -5.0000000e-05
  -4.0000000e-05
  -2.0000000e-05
  -2.0000000e-05
  -2.0000000e-05
  -2.0000000e-05
  -2.0000000e-05
  -1.0000000e-05
  -1.0000000e-05
   0.0000000e+00
   1.0000000e-05
  -1.0000000e-05
   1.0000000e-05
   1.0000000e-05
   1.0000000e-05
   2.0000000e-05
   1.0000000e-05
   1.0000000e-05
   0.0000000e+00
   0.0000000e+00
   0.0000000e+00
  -0.0000000e+00
  -1.0000000e-05
  -3.0000000e-05
  -2.0000000e-05
  -3.0000000e-05
  -5.0000000e-05
  -3.0000000e-05
  -4.0000000e-05
  -4.0000000e-05
  -4.0000000e-05
  -3.0000000e-05
  -2.0000000e-05
  -4.0000000e-05
  -6.0000000e-05
  -6.0000000e-05
  -5.0000000e-05
  -5.0000000e-05
  -4.0000000e-05
  -5.0000000e-05
  -6.0000000e-05
  -5.0000000e-05
  -5.0000000e-05
  -3.0000000e-05
  -3.0000000e-05
  -3.0000000e-05
  -1.0000000e-05
  -1.0000000e-05
  -1.0000000e-05
   0.0000000e+00
   0.0000000e+00
   1.0000000e-05
   2.0000000e-05
   2.0000000e-05
   3.0000000e-05
   3.0000000e-05
   2.0000000e-05
   3.0000000e-05
   3.0000000e-05
   1.0000000e-05
   1.0000000e-05
   1.0000000e-05
   1.0000000e-05
   1.0000000e-05
   0.0000000e+00
  -1.0000000e-05
  -1.0000000e-05
  -3.0000000e-05
  -2.0000000e-05
  -2.0000000e-05
  -5.0000000e-05
  -4.0000000e-05
  -5.0000000e-05
  -6.0000000e-05
  -5.0000000e-05
  -5.0000000e-05
  -6.0000000e-05
  -7.0000000e-05
  -6.0000000e-05
  -7.0000000e-05
  -6.0000000e-05
  -6.0000000e-05
  -7.0000000e-05
  -7.0000000e-05
  -7.0000000e-05
  -5.0000000e-05
  -4.0000000e-05
  -4.0000000e-05
  -3.0000000e-05
  -2.0000000e-05
  -2.0000000e-05
  -0.0000000e+00
   1.0000000e-05
   2.0000000e-05
   4.0000000e-05
   4.0000000e-05
   5.0000000e-05
   5.0000000e-05
   5.0000000e-05
   6.0000000e-05
   6.0000000e-05
   6.0000000e-05
   7.0000000e-05
   7.0000000e-05
   7.0000000e-05
   6.0000000e-05
   5.0000000e-05
   5.0000000e-05
   5.0000000e-05
   5.0000000e-05
   4.0000000e-05
   4.0000000e-05
   3.0000000e-05
   1.0000000e-05
   2.0000000e-05
   0.0000000e+00
  -1.0000000e-05
  -1.0000000e-05
  -2.0000000e-05
  -4.0000000e-05
  -5.0000000e-05
  -6.0000000e-05
  -7.0000000e-05
  -8.0000000e-05
  -8.0000000e-05
  -8.0000000e-05
  -9.0000000e-05
  -8.0000000e-05
  -8.0000000e-05
  -8.0000000e-05
  -9.0000000e-05
  -9.0000000e-05
  -8.0000000e-05
  -7.0000000e-05
  -6.0000000e-05
  -5.0000000e-05
  -6.0000000e-05
  -5.0000000e-05
  -4.0000000e-05
  -2.0000000e-05
  -3.0000000e-05
  -3.0000000e-05
  -2.0000000e-05
  -2.0000000e-05
  -0.0000000e+00
   0.0000000e+00
  -1.0000000e-05
  -2.0000000e-05
  -2.0000000e-05
  -0.0000000e+00
   1.0000000e-05
   1.0000000e-05
   1.0000000e-05
   1.0000000e-05
   0.0000000e+00
  -1.0000000e-05
  -1.0000000e-05
  -1.0000000e-05
  -3.0000000e-05
  -3.0000000e-05
  -4.0000000e-05
  -5.0000000e-05
  -4.0000000e-05
  -6.0000000e-05
  -7.0000000e-05
  -6.0000000e-05
  -7.0000000e-05
  -7.0000000e-05
  -7.0000000e-05
  -7.0000000e-05
  -7.0000000e-05
  -7.0000000e-05
  -7.0000000e-05
  -7.0000000e-05
  -7.0000000e-05
  -7.0000000e-05
  -6.0000000e-05
  -5.0000000e-05
  -5.0000000e-05
  -4.0000000e-05
  -3.0000000e-05
  -3.0000000e-05
  -3.0000000e-05
  -3.0000000e-05
  -2.0000000e-05
  -0.0000000e+00
   1.0000000e-05
   1.0000000e-05
   3.0000000e-05
   2.0000000e-05
   3.0000000e-05
   3.0000000e-05
   2.0000000e-05
   3.0000000e-05
   3.0000000e-05
   1.0000000e-05
   2.0000000e-05
  -0.0000000e+00
  -1.0000000e-05
   0.0000000e+00
  -2.0000000e-05
  -2.0000000e-05
  -1.0000000e-05
  -3.0000000e-05
  -2.0000000e-05
  -2.0000000e-05
  -4.0000000e-05
  -4.0000000e-05
  -4.0000000e-05
  -5.0000000e-05
  -6.0000000e-05
  -7.0000000e-05
  -7.0000000e-05
  -8.0000000e-05
  -8.0000000e-05
  -8.0000000e-05
  -8.0000000e-05
  -8.0000000e-05
  -8.0000000e-05
  -7.0000000e-05
  -7.0000000e-05
  -6.0000000e-05
  -5.0000000e-05
  -5.0000000e-05
  -4.0000000e-05
  -4.0000000e-05
  -4.0000000e-05
  -2.0000000e-05
  -1.0000000e-05
  -0.0000000e+00
   1.0000000e-05
   1.0000000e-05
  -0.0000000e+00
   0.0000000e+00
   1.0000000e-05
   2.0000000e-05
   2.0000000e-05
   1.0000000e-05
   1.0000000e-05
   0.0000000e+00
   2.0000000e-05
   2.0000000e-05
   1.0000000e-05
   1.0000000e-05
   0.0000000e+00
   0.0000000e+00
   0.0000000e+00
  -1.0000000e-05
  -2.0000000e-05
  -2.0000000e-05
  -3.0000000e-05
  -4.0000000e-05
  -3.0000000e-05
  -3.0000000e-05
  -4.0000000e-05
  -4.0000000e-05
  -5.0000000e-05
  -6.0000000e-05
  -7.0000000e-05
  -6.0000000e-05
  -7.0000000e-05
  -6.0000000e-05
  -6.0000000e-05
  -7.0000000e-05
  -7.0000000e-05
  -7.0000000e-05
  -7.0000000e-05
  -5.0000000e-05
  -4.0000000e-05
  -4.0000000e-05
  -4.0000000e-05
  -4.0000000e-05
  -4.0000000e-05
  -4.0000000e-05
  -4.0000000e-05
  -3.0000000e-05
  -2.0000000e-05
  -2.0000000e-05
  -0.0000000e+00
  -0.0000000e+00
  -1.0000000e-05
   0.0000000e+00
   1.0000000e-05
  -0.0000000e+00
   1.0000000e-05
   0.0000000e+00
   0.0000000e+00
  -0.0000000e+00
  -1.0000000e-05
  -1.0000000e-05
  -2.0000000e-05
  -1.0000000e-05
  -1.0000000e-05
  -2.0000000e-05
  -3.0000000e-05
  -3.0000000e-05
  -3.0000000e-05
  -3.0000000e-05
  -2.0000000e-05
  -3.0000000e-05
  -4.0000000e-05
  -3.0000000e-05
  -5.0000000e-05
  -5.0000000e-05
  -4.0000000e-05
  -6.0000000e-05
  -5.0000000e-05
  -5.0000000e-05
  -5.0000000e-05
  -4.0000000e-05
  -4.0000000e-05
  -4.0000000e-05
  -4.0000000e-05
  -4.0000000e-05
  -3.0000000e-05
  -2.0000000e-05
  -1.0000000e-05
   0.0000000e+00
   0.0000000e+00
   1.0000000e-05
   1.0000000e-05
   1.0000000e-05
   1.0000000e-05
   2.0000000e-05
   0.0000000e+00
   1.0000000e-05
   1.0000000e-05
   0.0000000e+00
   0.0000000e+00
  -0.0000000e+00
  -1.0000000e-05
  -1.0000000e-05
  -1.0000000e-05
  -3.0000000e-05
  -3.0000000e-05
  -3.0000000e-05
  -4.0000000e-05
  -5.0000000e-05
  -5.0000000e-05
  -7.0000000e-05
  -6.0000000e-05
  -8.0000000e-05
  -8.0000000e-05
  -7.0000000e-05
  -8.0000000e-05
  -7.0000000e-05
  -8.0000000e-05
  -7.0000000e-05
  -8.0000000e-05
  -7.0000000e-05
  -6.0000000e-05
  -6.0000000e-05
  -4.0000000e-05
  -4.0000000e-05
  -4.0000000e-05
  -5.0000000e-05
  -4.0000000e-05
  -2.0000000e-05
  -1.0000000e-05
   1.0000000e-05
   1.0000000e-05
   1.0000000e-05
   2.0000000e-05
   3.0000000e-05
   3.0000000e-05
   3.0000000e-05
   4.0000000e-05
   3.0000000e-05
   3.0000000e-05
   4.0000000e-05
   3.0000000e-05
   2.0000000e-05
   1.0000000e-05
   1.0000000e-05
   1.0000000e-05
  -1.0000000e-05
  -1.0000000e-05
  -2.0000000e-05
  -2.0000000e-05
  -3.0000000e-05
  -4.0000000e-05
  -4.0000000e-05
  -5.0000000e-05
  -6.0000000e-05
  -6.0000000e-05
  -7.0000000e-05
  -7.0000000e-05
  -9.0000000e-05
  -8.0000000e-05
  -8.0000000e-05
  -1.0000000e-04
  -8.0000000e-05
  -9.0000000e-05
  -9.0000000e-05
  -8.0000000e-05
  -9.0000000e-05
  -8.0000000e-05
  -8.0000000e-05
  -7.0000000e-05
  -5.0000000e-05
  -5.0000000e-05
  -5.0000000e-05
  -3.0000000e-05
  -3.0000000e-05
  -3.0000000e-05
  -1.0000000e-05
  -0.0000000e+00
   1.0000000e-05
   3.0000000e-05
   3.0000000e-05
   4.0000000e-05
   2.0000000e-05
   3.0000000e-05
   3.0000000e-05
   4.0000000e-05
   6.0000000e-05
   6.0000000e-05
   5.0000000e-05
   2.0000000e-05
   3.0000000e-05
   4.0000000e-05
   3.0000000e-05
   3.0000000e-05
   2.0000000e-05
   0.0000000e+00
  -2.0000000e-05
  -1.0000000e-05
  -2.0000000e-05
  -5.0000000e-05
  -5.0000000e-05
  -7.0000000e-05
  -6.0000000e-05
  -8.0000000e-05
  -8.0000000e-05
  -8.0000000e-05
  -1.0000000e-04
  -1.2000000e-04
  -1.2000000e-04
  -1.1000000e-04
  -1.1000000e-04
  -1.1000000e-04
  -1.1000000e-04
  -1.0000000e-04
  -1.1000000e-04
  -1.0000000e-04
  -9.0000000e-05
  -1.0000000e-04
  -9.0000000e-05
  -7.0000000e-05
  -6.0000000e-05
  -4.0000000e-05
  -4.0000000e-05
  -4.0000000e-05
  -2.0000000e-05
  -2.0000000e-05
  -1.0000000e-05
   2.0000000e-05
   2.0000000e-05
   2.0000000e-05
   2.0000000e-05
   2.0000000e-05
   2.0000000e-05
   1.0000000e-05
   0.0000000e+00
   0.0000000e+00
   1.0000000e-05
   1.0000000e-05
   0.0000000e+00
  -1.0000000e-05
  -3.0000000e-05
  -3.0000000e-05
  -3.0000000e-05
  -3.0000000e-05
  -4.0000000e-05
  -5.0000000e-05
  -6.0000000e-05
  -7.0000000e-05
  -6.0000000e-05
  -6.0000000e-05
  -7.0000000e-05
  -8.0000000e-05
  -8.0000000e-05
  -8.0000000e-05
  -8.0000000e-05
  -8.0000000e-05
  -7.0000000e-05
  -8.0000000e-05
  -7.0000000e-05
  -7.0000000e-05
  -7.0000000e-05
  -7.0000000e-05
  -5.0000000e-05
  -4.0000000e-05
  -3.0000000e-05
  -2.0000000e-05
  -2.0000000e-05
  -1.0000000e-05
   1.0000000e-05
   2.0000000e-05
   1.0000000e-05
   1.0000000e-05
   0.0000000e+00
   1.0000000e-05
   2.0000000e-05
   2.0000000e-05
   2.0000000e-05
   1.0000000e-05
   1.0000000e-05
   1.0000000e-05
   0.0000000e+00
   0.0000000e+00
  -1.0000000e-05
  -0.0000000e+00
  -1.0000000e-05
  -3.0000000e-05
  -2.0000000e-05
  -5.0000000e-05
  -4.0000000e-05
  -5.0000000e-05
  -5.0000000e-05
  -6.0000000e-05
  -8.0000000e-05
  -7.0000000e-05
  -8.0000000e-05
  -9.0000000e-05
  -9.0000000e-05
  -9.0000000e-05
  -1.0000000e-04
  -9.0000000e-05
  -8.0000000e-05
  -9.0000000e-05
  -9.0000000e-05
  -9.0000000e-05
  -8.0000000e-05
  -8.0000000e-05
  -7.0000000e-05
  -6.0000000e-05
  -6.0000000e-05
  -6.0000000e-05
  -5.0000000e-05
  -3.0000000e-05
  -3.0000000e-05
  -2.0000000e-05
  -0.0000000e+00
  -1.0000000e-05
   0.0000000e+00
   2.0000000e-05
   2.0000000e-05
   3.0000000e-05
   3.0000000e-05
   4.0000000e-05
   3.0000000e-05
   3.0000000e-05
   4.0000000e-05
   4.0000000e-05
   3.0000000e-05
   3.0000000e-05
   2.0000000e-05
   1.0000000e-05
   1.0000000e-05
  -1.0000000e-05
  -1.0000000e-05
  -1.0000000e-05
  -3.0000000e-05
  -3.0000000e-05
  -4.0000000e-05
  -5.0000000e-05
  -6.0000000e-05
  -7.0000000e-05
  -7.0000000e-05
  -8.0000000e-05
  -8.0000000e-05
  -9.0000000e-05
  -9.0000000e-05
  -9.0000000e-05
  -1.1000000e-04
  -1.0000000e-04
  -9.0000000e-05
  -1.0000000e-04
  -9.0000000e-05
  -9.0000000e-05
  -8.0000000e-05
  -7.0000000e-05
  -6.0000000e-05
  -5.0000000e-05
  -4.0000000e-05
  -4.0000000e-05
  -1.0000000e-05
   0.0000000e+00
  -0.0000000e+00
   0.0000000e+00
   2.0000000e-05
   2.0000000e-05
   3.0000000e-05
   3.0000000e-05
   3.0000000e-05
   2.0000000e-05
   2.0000000e-05
   4.0000000e-05
   3.0000000e-05
   3.0000000e-05
   2.0000000e-05
   2.0000000e-05
   3.0000000e-05
   2.0000000e-05
   2.0000000e-05
   0.0000000e+00
  -2.0000000e-05
  -3.0000000e-05
  -3.0000000e-05
  -3.0000000e-05
  -4.0000000e-05
  -5.0000000e-05
  -5.0000000e-05
  -8.0000000e-05
  -8.0000000e-05
  -9.0000000e-05
  -1.0000000e-04
  -1.0000000e-04
  -1.0000000e-04
  -1.0000000e-04
  -1.0000000e-04
  -9.0000000e-05
  -9.0000000e-05
  -8.0000000e-05
  -7.0000000e-05
  -8.0000000e-05
  -6.0000000e-05
  -7.0000000e-05
  -6.0000000e-05
  -6.0000000e-05
  -6.0000000e-05
  -4.0000000e-05
  -3.0000000e-05
  -3.0000000e-05
  -3.0000000e-05
  -1.0000000e-05
  -2.0000000e-05
  -2.0000000e-05
  -1.0000000e-05
  -1.0000000e-05
  -0.0000000e+00
  -0.0000000e+00
  -1.0000000e-05
  -1.0000000e-05
  -4.0000000e-05
  -3.0000000e-05
  -1.0000000e-05
  -2.0000000e-05
  -1.0000000e-05
  -3.0000000e-05
  -3.0000000e-05
  -3.0000000e-05
  -4.0000000e-05
  -3.0000000e-05
  -3.0000000e-05
  -5.0000000e-05
  -4.0000000e-05
  -4.0000000e-05
  -4.0000000e-05
  -5.0000000e-05
  -6.0000000e-05
  -6.0000000e-05
  -5.0000000e-05
  -5.0000000e-05
  -5.0000000e-05
  -4.0000000e-05
  -4.0000000e-05
  -4.0000000e-05
  -3.0000000e-05
  -3.0000000e-05
  -2.0000000e-05
  -0.0000000e+00
  -1.0000000e-05
   0.0000000e+00
   1.0000000e-05
   0.0000000e+00
   1.0000000e-05
   2.0000000e-05
   3.0000000e-05
   3.0000000e-05
   4.0000000e-05
   4.0000000e-05
   4.0000000e-05
   2.0000000e-05
   2.0000000e-05
   1.0000000e-05
   1.0000000e-05
   1.0000000e-05
   1.0000000e-05
   1.0000000e-05
  -1.0000000e-05
  -2.0000000e-05
  -3.0000000e-05
  -4.0000000e-05
  -4.0000000e-05
  -4.0000000e-05
  -7.0000000e-05
  -7.0000000e-05
  -8.0000000e-05
  -8.0000000e-05
  -8.0000000e-05
  -9.0000000e-05
  -1.0000000e-04
  -1.1000000e-04
  -1.0000000e-04
  -8.0000000e-05
  -1.0000000e-04
  -1.0000000e-04
  -1.0000000e-04
  -1.1000000e-04
  -1.0000000e-04
  -9.0000000e-05
  -8.0000000e-05
  -6.0000000e-05
  -6.0000000e-05
  -4.0000000e-05
  -4.0000000e-05
  -3.0000000e-05
  -1.0000000e-05
  -1.0000000e-05
   1.0000000e-05
   2.0000000e-05
   3.0000000e-05
   3.0000000e-05
   5.0000000e-05
   5.0000000e-05
   5.0000000e-05
   5.0000000e-05
   5.0000000e-05
   8.0000000e-05
   8.0000000e-05
   7.0000000e-05
   7.0000000e-05
   4.0000000e-05
   3.0000000e-05
   4.0000000e-05
   3.0000000e-05
   4.0000000e-05
   1.0000000e-05
   1.0000000e-05
   1.0000000e-05
  -1.0000000e-05
  -2.0000000e-05
  -2.0000000e-05
  -2.0000000e-05
  -3.0000000e-05
  -4.0000000e-05
  -4.0000000e-05
  -5.0000000e-05
  -5.0000000e-05
  -6.0000000e-05
  -6.0000000e-05
  -8.0000000e-05
  -8.0000000e-05
  -7.0000000e-05
  -7.0000000e-05
  -7.0000000e-05
  -7.0000000e-05
  -8.0000000e-05
  -8.0000000e-05
  -7.0000000e-05
  -6.0000000e-05
  -4.0000000e-05
  -4.0000000e-05
  -4.0000000e-05
  -2.0000000e-05
  -1.0000000e-05
  -1.0000000e-05
  -0.0000000e+00
  -0.0000000e+00
  -0.0000000e+00
  -1.0000000e-05
   1.0000000e-05
   1.0000000e-05
   2.0000000e-05
   2.0000000e-05
  -0.0000000e+00
   1.0000000e-05
   1.0000000e-05
   2.0000000e-05
   3.0000000e-05
   2.0000000e-05
   1.0000000e-05
   0.0000000e+00
  -0.0000000e+00
  -1.0000000e-05
  -2.0000000e-05
  -3.0000000e-05
  -3.0000000e-05
  -3.0000000e-05
  -3.0000000e-05
  -4.0000000e-05
  -4.0000000e-05
  -5.0000000e-05
  -6.0000000e-05
  -5.0000000e-05
  -6.0000000e-05
  -5.0000000e-05
  -5.0000000e-05
  -5.0000000e-05
  -5.0000000e-05
  -6.0000000e-05
  -6.0000000e-05
  -6.0000000e-05
  -5.0000000e-05
  -3.0000000e-05
  -3.0000000e-05
  -3.0000000e-05
  -2.0000000e-05
  -2.0000000e-05
  -0.0000000e+00
   0.0000000e+00
   1.0000000e-05
   2.0000000e-05
   2.0000000e-05
   4.0000000e-05
   3.0000000e-05
   2.0000000e-05
   3.0000000e-05
   3.0000000e-05
   3.0000000e-05
   4.0000000e-05
   2.0000000e-05
   1.0000000e-05
   2.0000000e-05
   1.0000000e-05
   1.0000000e-05
   0.0000000e+00
  -1.0000000e-05
  -2.0000000e-05
  -2.0000000e-05
  -2.0000000e-05
  -2.0000000e-05
  -4.0000000e-05
  -4.0000000e-05
  -6.0000000e-05
  -6.0000000e-05
  -5.0000000e-05
  -5.0000000e-05
  -6.0000000e-05
  -6.0000000e-05
  -7.0000000e-05
  -8.0000000e-05
  -6.0000000e-05
  -7.0000000e-05
  -6.0000000e-05
  -5.0000000e-05
  -4.0000000e-05
  -4.0000000e-05
  -4.0000000e-05
  -3.0000000e-05
  -3.0000000e-05
  -2.0000000e-05
  -1.0000000e-05
  -0.0000000e+00
  -0.0000000e+00
   0.0000000e+00
   1.0000000e-05
  -1.0000000e-05
   1.0000000e-05
   2.0000000e-05
   1.0000000e-05
   2.0000000e-05
   2.0000000e-05
   1.0000000e-05
   1.0000000e-05
   0.0000000e+00
  -0.0000000e+00
  -1.0000000e-05
  -2.0000000e-05
  -2.0000000e-05
  -5.0000000e-05
  -4.0000000e-05
  -5.0000000e-05
  -6.0000000e-05
  -7.0000000e-05
  -8.0000000e-05
  -7.0000000e-05
  -7.0000000e-05
  -8.0000000e-05
  -8.0000000e-05
  -8.0000000e-05
  -9.0000000e-05
  -9.0000000e-05
  -9.0000000e-05
  -7.0000000e-05
  -8.0000000e-05
  -8.0000000e-05
  -6.0000000e-05
  -7.0000000e-05
  -6.0000000e-05
  -6.0000000e-05
  -5.0000000e-05
  -3.0000000e-05
  -3.0000000e-05
  -2.0000000e-05
  -0.0000000e+00
   1.0000000e-05
   2.0000000e-05
   3.0000000e-05
   5.0000000e-05
   5.0000000e-05
   6.0000000e-05
   8.0000000e-05
   8.0000000e-05
   9.0000000e-05
   9.0000000e-05
   8.0000000e-05
   8.0000000e-05
   8.0000000e-05
   7.0000000e-05
   6.0000000e-05
   7.0000000e-05
   6.0000000e-05
   6.0000000e-05
   6.0000000e-05
   4.0000000e-05
   3.0000000e-05
   2.0000000e-05
   0.0000000e+00
  -1.0000000e-05
  -2.0000000e-05
  -4.0000000e-05
  -4.0000000e-05
  -7.0000000e-05
  -6.0000000e-05
  -7.0000000e-05
  -8.0000000e-05
  -7.0000000e-05
  -7.0000000e-05
  -9.0000000e-05
  -1.0000000e-04
  -1.1000000e-04
  -1.1000000e-04
  -9.0000000e-05
  -9.0000000e-05
  -9.0000000e-05
  -1.0000000e-04
  -1.0000000e-04
  -7.0000000e-05
  -7.0000000e-05
  -6.0000000e-05
  -5.0000000e-05
  -4.0000000e-05
  -1.0000000e-05
  -0.0000000e+00
   1.0000000e-05
   1.0000000e-05
   1.0000000e-05
   2.0000000e-05
   4.0000000e-05
   5.0000000e-05
   5.0000000e-05
   5.0000000e-05
   5.0000000e-05
   3.0000000e-05
   4.0000000e-05
   4.0000000e-05
   4.0000000e-05
   4.0000000e-05
   1.0000000e-05
   1.0000000e-05
   1.0000000e-05
  -0.0000000e+00
  -1.0000000e-05
  -2.0000000e-05
  -2.0000000e-05
  -3.0000000e-05
  -4.0000000e-05
  -5.0000000e-05
  -7.0000000e-05
  -8.0000000e-05
  -8.0000000e-05
  -9.0000000e-05
  -9.0000000e-05
  -9.0000000e-05
  -1.0000000e-04
  -1.0000000e-04
  -1.0000000e-04
  -1.1000000e-04
  -1.0000000e-04
  -9.0000000e-05
  -9.0000000e-05
  -8.0000000e-05
  -8.0000000e-05
  -8.0000000e-05
  -5.0000000e-05
  -4.0000000e-05
  -3.0000000e-05
  -3.0000000e-05
  -2.0000000e-05
  -1.0000000e-05
   1.0000000e-05
   2.0000000e-05
   2.0000000e-05
   3.0000000e-05
   4.0000000e-05
   5.0000000e-05
   6.0000000e-05
   4.0000000e-05
   5.0000000e-05
   5.0000000e-05
   4.0000000e-05
   7.0000000e-05
   6.0000000e-05
   5.0000000e-05
   4.0000000e-05
   3.0000000e-05
   4.0000000e-05
   3.0000000e-05
   2.0000000e-05
   1.0000000e-05
  -0.0000000e+00
  -2.0000000e-05
  -2.0000000e-05
  -3.0000000e-05
  -5.0000000e-05
  -5.0000000e-05
  -5.0000000e-05
  -5.0000000e-05
  -5.0000000e-05
  -5.0000000e-05
  -5.0000000e-05
  -6.0000000e-05
  -7.0000000e-05
  -6.0000000e-05
  -6.0000000e-05
  -6.0000000e-05
  -5.0000000e-05
  -6.0000000e-05
  -6.0000000e-05
  -3.0000000e-05
  -3.0000000e-05
  -2.0000000e-05
  -1.0000000e-05
   0.0000000e+00
  -0.0000000e+00
   2.0000000e-05
   3.0000000e-05
   3.0000000e-05
   4.0000000e-05
   2.0000000e-05
   3.0000000e-05
   2.0000000e-05
   0.0000000e+00
   3.0000000e-05
   2.0000000e-05
   2.0000000e-05
   2.0000000e-05
  -0.0000000e+00
   0.0000000e+00
  -0.0000000e+00
  -1.0000000e-05
  -1.0000000e-05
  -1.0000000e-05
  -2.0000000e-05
  -4.0000000e-05
  -4.0000000e-05
  -5.0000000e-05
  -6.0000000e-05
  -7.0000000e-05
  -8.0000000e-05
  -8.0000000e-05
  -9.0000000e-05
  -8.0000000e-05
  -8.0000000e-05
  -9.0000000e-05
  -9.0000000e-05
  -1.0000000e-04
  -9.0000000e-05
  -8.0000000e-05
  -7.0000000e-05
  -6.0000000e-05
  -6.0000000e-05
  -6.0000000e-05
  -6.0000000e-05
  -5.0000000e-05
  -4.0000000e-05
  -3.0000000e-05
  -1.0000000e-05
  -1.0000000e-05
  -1.0000000e-05
  -0.0000000e+00
  -0.0000000e+00
   0.0000000e+00
   1.0000000e-05
   2.0000000e-05
   2.0000000e-05
   3.0000000e-05
   2.0000000e-05
   2.0000000e-05
   2.0000000e-05
   1.0000000e-05
   1.0000000e-05
  -0.0000000e+00
   0.0000000e+00
  -1.0000000e-05
  -3.0000000e-05
  -3.0000000e-05
  -5.0000000e-05
  -5.0000000e-05
  -6.0000000e-05
  -7.0000000e-05
  -8.0000000e-05
  -9.0000000e-05
  -8.0000000e-05
  -9.0000000e-05
  -8.0000000e-05
  -9.0000000e-05
  -1.0000000e-04
  -1.0000000e-04
  -1.0000000e-04
  -9.0000000e-05
  -9.0000000e-05
  -1.1000000e-04
  -1.0000000e-04
  -1.0000000e-04
  -9.0000000e-05
  -7.0000000e-05
  -7.0000000e-05
  -7.0000000e-05
  -5.0000000e-05
  -5.0000000e-05
  -3.0000000e-05
  -1.0000000e-05
  -0.0000000e+00
   2.0000000e-05
   2.0000000e-05
   2.0000000e-05
   2.0000000e-05
   3.0000000e-05
   5.0000000e-05
   4.0000000e-05
   4.0000000e-05
   3.0000000e-05
   2.0000000e-05
   3.0000000e-05
   2.0000000e-05
   3.0000000e-05
   2.0000000e-05
   0.0000000e+00
   1.0000000e-05
   1.0000000e-05
   1.0000000e-05
  -0.0000000e+00
  -1.0000000e-05
  -2.0000000e-05
  -2.0000000e-05
  -3.0000000e-05
  -3.0000000e-05
  -4.0000000e-05
  -4.0000000e-05
  -4.0000000e-05
  -5.0000000e-05
  -6.0000000e-05
  -5.0000000e-05
  -6.0000000e-05
  -6.0000000e-05
  -4.0000000e-05
  -4.0000000e-05
  -3.0000000e-05
  -3.0000000e-05
  -3.0000000e-05
  -3.0000000e-05
  -3.0000000e-05
  -1.0000000e-05
  -0.0000000e+00
   1.0000000e-05
   2.0000000e-05
   1.0000000e-05
   1.0000000e-05
   2.0000000e-05
   4.0000000e-05
   3.0000000e-05
   4.0000000e-05
   4.0000000e-05
   4.0000000e-05
   4.0000000e-05
   4.0000000e-05
   4.0000000e-05
   3.0000000e-05
   2.0000000e-05
   2.0000000e-05
   2.0000000e-05
   0.0000000e+00
  -1.0000000e-05
  -2.0000000e-05
  -2.0000000e-05
  -4.0000000e-05
  -5.0000000e-05
  -5.0000000e-05
  -5.0000000e-05
  -5.0000000e-05
  -6.0000000e-05
  -5.0000000e-05
  -6.0000000e-05
  -8.0000000e-05
  -6.0000000e-05
  -7.0000000e-05
  -7.0000000e-05
  -7.0000000e-05
  -9.0000000e-05
  -9.0000000e-05
  -9.0000000e-05
  -9.0000000e-05
  -8.0000000e-05
  -8.0000000e-05
  -8.0000000e-05
  -6.0000000e-05
  -5.0000000e-05
  -4.0000000e-05
  -2.0000000e-05
  -2.0000000e-05
  -2.0000000e-05
  -1.0000000e-05
   0.0000000e+00
   1.0000000e-05
   2.0000000e-05
   1.0000000e-05
   2.0000000e-05
   0.0000000e+00
   1.0000000e-05
   1.0000000e-05
   1.0000000e-05
   2.0000000e-05
   1.0000000e-05
   1.0000000e-05
  -1.0000000e-05
  -1.0000000e-05
  -2.0000000e-05
  -4.0000000e-05
  -4.0000000e-05
  -4.0000000e-05
  -5.0000000e-05
  -6.0000000e-05
  -8.0000000e-05
  -9.0000000e-05
  -9.0000000e-05
  -1.1000000e-04
  -1.1000000e-04
  -1.0000000e-04
  -1.2000000e-04
  -1.1000000e-04
  -1.1000000e-04
  -1.2000000e-04
  -1.2000000e-04
  -1.2000000e-04
  -1.1000000e-04
  -1.1000000e-04
  -1.1000000e-04
  -9.0000000e-05
  -8.0000000e-05
  -7.0000000e-05
  -7.0000000e-05
  -6.0000000e-05
  -5.0000000e-05
  -4.0000000e-05
  -2.0000000e-05
  -0.0000000e+00
   1.0000000e-05
   0.0000000e+00
   2.0000000e-05
   4.0000000e-05
   4.0000000e-05
   6.0000000e-05
   5.0000000e-05
   5.0000000e-05
   5.0000000e-05
   5.0000000e-05
   5.0000000e-05
   4.0000000e-05
   4.0000000e-05
   3.0000000e-05
   3.0000000e-05
   2.0000000e-05
   1.0000000e-05
   1.0000000e-05
  -1.0000000e-05
  -1.0000000e-05
  -2.0000000e-05
  -3.0000000e-05
  -3.0000000e-05
  -4.0000000e-05
  -6.0000000e-05
  -7.0000000e-05
  -7.0000000e-05
  -8.0000000e-05
  -1.0000000e-04
  -1.0000000e-04
  -1.0000000e-04
  -1.0000000e-04
  -1.1000000e-04
  -1.0000000e-04
  -1.1000000e-04
  -1.2000000e-04
  -1.0000000e-04
  -8.0000000e-05
  -7.0000000e-05
  -6.0000000e-05
  -7.0000000e-05
  -8.0000000e-05
  -6.0000000e-05
  -6.0000000e-05
