# Supplementary material for: A Novel Classification Method for Flutter Signals Based on the CNN and STFT
Source: Hindawi journal article supplement (doi:10.1155/2019/9375437), 2019-04-09
Supplement: f1 [file 9375437.f1.zip › 01_9_z29.5_20channel.txt]

  -1.7054000e-01
  -1.3517000e-01
  -1.6097000e-01
  -1.6111000e-01
  -1.0786000e-01
  -1.5919000e-01
  -1.1551000e-01
  -9.9530000e-02
  -2.3426000e-01
  -1.1798000e-01
   3.7950000e-02
   4.7840000e-02
   3.4930000e-02
   1.1365000e-01
   7.3040000e-02
   6.4900000e-02
   1.0745000e-01
   8.6150000e-02
   7.2000000e-02
   2.2253000e-01
   1.8568000e-01
   2.0698000e-01
   2.9203000e-01
   1.1979000e-01
   2.4885000e-01
   1.5351000e-01
   1.9483000e-01
  -7.5670000e-02
   1.1683000e-01
   1.4540000e-01
  -3.9510000e-02
   5.9850000e-02
   5.4150000e-02
   4.1370000e-02
  -2.8000000e-03
  -2.3720000e-02
  -3.9700000e-02
  -1.5667000e-01
   1.4920000e-02
  -1.2048000e-01
  -5.9330000e-02
  -6.9640000e-02
  -6.6380000e-02
  -4.7820000e-02
  -4.9110000e-02
   8.7200000e-03
  -1.1828000e-01
   1.6303000e-01
   5.5770000e-02
   8.7520000e-02
   6.9830000e-02
   5.6070000e-02
   2.1520000e-02
  -3.4460000e-02
   3.6250000e-02
   1.7140000e-02
  -5.5440000e-02
  -8.8400000e-02
  -3.8800000e-02
  -9.0670000e-02
  -7.7320000e-02
   4.4970000e-02
  -2.4350000e-02
  -1.8809000e-01
   1.9960000e-02
   8.2390000e-02
  -2.9310000e-02
  -5.5520000e-02
   2.2130000e-02
  -1.0526000e-01
  -1.8320000e-02
  -2.0370000e-02
  -2.1660000e-02
  -4.7300000e-02
   8.9080000e-02
   8.9520000e-02
   7.2030000e-02
   4.5820000e-02
   1.0553000e-01
   1.0611000e-01
   1.1113000e-01
   8.7680000e-02
  -8.7700000e-03
   6.3200000e-02
  -2.8460000e-02
  -6.1770000e-02
  -1.3953000e-01
   1.7800000e-03
  -1.6799000e-01
  -9.6980000e-02
  -9.2810000e-02
  -1.2286000e-01
  -1.3586000e-01
  -1.7992000e-01
  -6.1470000e-02
  -2.0322000e-01
  -1.5313000e-01
  -1.1348000e-01
  -1.8241000e-01
  -2.1693000e-01
  -1.3336000e-01
  -1.1897000e-01
  -2.0424000e-01
  -8.6310000e-02
  -1.1373000e-01
  -1.8450000e-02
  -8.2230000e-02
  -8.2780000e-02
  -2.8300000e-02
  -3.7950000e-02
  -4.2280000e-02
   7.6800000e-02
  -4.8500000e-03
   1.3820000e-02
   3.7510000e-02
   1.6163000e-01
   1.4035000e-01
   2.0840000e-02
   2.2203000e-01
   1.0126000e-01
   7.3100000e-02
   5.2750000e-02
   6.1100000e-03
   1.2928000e-01
  -7.8500000e-02
   1.9690000e-02
   2.3470000e-02
  -4.1400000e-03
  -7.1620000e-02
  -3.4050000e-02
   7.0680000e-02
  -1.5831000e-01
  -7.1000000e-03
  -3.6190000e-02
  -4.6670000e-02
  -6.4820000e-02
  -5.7220000e-02
  -3.6850000e-02
  -1.8178000e-01
  -1.5083000e-01
  -7.9920000e-02
  -2.5672000e-01
  -2.1318000e-01
  -1.7005000e-01
  -1.6308000e-01
  -2.1194000e-01
  -3.8500000e-02
   4.5950000e-02
   2.9310000e-02
   8.4750000e-02
  -5.5140000e-02
   1.9080000e-02
   1.2834000e-01
   4.9630000e-02
   1.4233000e-01
   7.5430000e-02
   1.1351000e-01
   1.1460000e-02
   2.2620000e-02
   1.3399000e-01
   3.6820000e-02
   5.4260000e-02
   6.7420000e-02
   5.3030000e-02
   7.0820000e-02
  -4.1100000e-03
   1.2017000e-01
   8.2470000e-02
  -3.8580000e-02
   1.1653000e-01
   5.7030000e-02
  -3.7150000e-02
  -4.4100000e-03
   7.2740000e-02
  -2.0040000e-02
  -1.5960000e-02
   8.7000000e-02
   8.7700000e-03
  -7.5180000e-02
  -5.4620000e-02
  -1.3740000e-02
  -4.7460000e-02
   4.3130000e-02
   2.1400000e-03
   7.5100000e-02
   7.2300000e-02
   6.8980000e-02
   8.0170000e-02
   1.9250000e-02
   1.1296000e-01
   1.0424000e-01
   8.0860000e-02
  -4.4690000e-02
  -6.5500000e-02
  -4.6530000e-02
  -8.0830000e-02
  -7.7900000e-03
  -6.3770000e-02
  -5.1740000e-02
  -1.0394000e-01
   3.7450000e-02
  -8.5800000e-03
  -1.8010000e-02
   7.1120000e-02
  -1.2170000e-02
   4.3510000e-02
   1.5324000e-01
   7.1700000e-02
   3.0226000e-01
   3.2872000e-01
   4.0815000e-01
   3.1539000e-01
   2.0923000e-01
   3.2795000e-01
   1.7857000e-01
   1.7685000e-01
  -4.6390000e-02
   8.4560000e-02
   1.3330000e-02
  -9.5740000e-02
  -8.5760000e-02
  -7.6580000e-02
  -9.6100000e-02
  -7.7980000e-02
  -1.7369000e-01
  -8.7570000e-02
  -1.1507000e-01
  -1.2028000e-01
  -1.3882000e-01
  -5.5080000e-02
   5.8590000e-02
  -2.3850000e-02
  -4.2770000e-02
  -1.6193000e-01
  -1.3405000e-01
  -1.3830000e-01
   1.9710000e-02
  -2.4760000e-02
  -5.4750000e-02
  -9.1880000e-02
  -1.0545000e-01
  -4.6900000e-03
  -1.7300000e-03
   1.8197000e-01
   1.1373000e-01
   1.8022000e-01
   2.2280000e-01
   9.9090000e-02
   1.5628000e-01
   1.9349000e-01
   1.7103000e-01
   7.3950000e-02
   1.1642000e-01
   1.6510000e-02
   7.9100000e-02
   1.4016000e-01
  -5.0200000e-03
   1.0224000e-01
   1.1154000e-01
  -3.5100000e-02
   9.6000000e-04
   4.0250000e-02
   2.7360000e-02
  -9.9280000e-02
  -1.6730000e-02
   1.0060000e-02
  -1.9850000e-02
   8.7130000e-02
   9.8920000e-02
   1.0638000e-01
   7.2690000e-02
   1.0485000e-01
   1.2355000e-01
  -4.1320000e-02
   1.4216000e-01
   2.4730000e-02
   1.9710000e-02
   3.1640000e-02
  -4.1400000e-03
   2.5470000e-02
  -1.2352000e-01
   3.6690000e-02
  -2.0300000e-01
  -1.0402000e-01
  -6.2050000e-02
  -7.4550000e-02
  -4.5080000e-02
   1.4920000e-02
   7.8550000e-02
  -7.9130000e-02
  -3.8500000e-02
   4.1620000e-02
  -1.1093000e-01
  -9.5390000e-02
  -3.0790000e-02
  -8.9700000e-03
   1.5088000e-01
   1.0386000e-01
   2.6916000e-01
   2.1671000e-01
   4.3647000e-01
   3.2123000e-01
   2.3996000e-01
   3.8158000e-01
   2.2044000e-01
   2.0399000e-01
   2.1518000e-01
   1.6522000e-01
   1.3232000e-01
  -1.1210000e-02
  -3.1700000e-02
  -1.0342000e-01
  -1.0150000e-01
  -1.3731000e-01
  -1.4959000e-01
  -1.5209000e-01
  -1.5985000e-01
  -7.7540000e-02
  -1.0559000e-01
   1.1513000e-01
   4.8830000e-02
   6.0130000e-02
   5.0830000e-02
  -5.5880000e-02
  -6.1200000e-02
  -2.0621000e-01
   6.8550000e-02
  -1.2500000e-02
   2.4540000e-02
  -5.9000000e-02
  -1.0704000e-01
  -1.3268000e-01
  -1.0781000e-01
  -5.2480000e-02
  -5.5270000e-02
  -4.6390000e-02
   1.1410000e-02
   4.5240000e-02
   3.4220000e-02
   1.4647000e-01
   4.6060000e-02
   2.3440000e-01
   2.2867000e-01
   2.1913000e-01
   2.4164000e-01
   2.3728000e-01
   2.7692000e-01
   1.7317000e-01
   2.3322000e-01
   1.8354000e-01
   1.5489000e-01
   1.8011000e-01
  -1.6450000e-02
   2.3140000e-02
   5.2400000e-03
  -7.2820000e-02
  -8.8530000e-02
  -1.2780000e-01
  -1.6147000e-01
  -1.5195000e-01
  -1.2547000e-01
  -1.1850000e-01
  -2.0141000e-01
  -1.5850000e-01
  -2.1765000e-01
  -9.0230000e-02
  -1.6404000e-01
  -1.6188000e-01
  -8.6590000e-02
  -3.8580000e-02
   7.2900000e-03
   9.1900000e-03
   3.0130000e-02
  -1.2150000e-02
   1.0814000e-01
   1.2970000e-02
   2.0218000e-01
   4.9630000e-02
   2.1973000e-01
   1.1930000e-01
   8.0720000e-02
   4.4940000e-02
   7.7000000e-04
   2.2083000e-01
  -2.3800000e-02
   9.1170000e-02
   1.2434000e-01
  -3.2600000e-03
   1.0420000e-02
   4.3490000e-02
   3.8630000e-02
   1.9220000e-02
  -5.7410000e-02
   1.1160000e-02
  -3.2900000e-02
  -1.8100000e-03
   8.7220000e-02
  -8.2800000e-02
  -6.9100000e-03
  -4.6530000e-02
  -2.6400000e-02
  -1.5782000e-01
  -1.6180000e-02
  -1.8362000e-01
  -7.6280000e-02
   1.4211000e-01
   7.1840000e-02
  -5.8430000e-02
  -1.3820000e-02
   7.3560000e-02
  -4.6450000e-02
  -5.2260000e-02
   7.7460000e-02
  -3.5010000e-02
  -2.3110000e-02
   1.3586000e-01
  -3.0020000e-02
   7.3890000e-02
   1.2977000e-01
   8.6480000e-02
  -6.0620000e-02
  -3.3260000e-02
   2.9260000e-02
  -1.4575000e-01
  -3.0240000e-02
  -1.1581000e-01
  -3.1230000e-02
  -7.4170000e-02
  -5.1380000e-02
  -6.7700000e-03
  -7.0570000e-02
   3.7210000e-02
   5.4750000e-02
   1.7050000e-02
   2.8980000e-02
   7.5870000e-02
   1.0594000e-01
   2.1488000e-01
   2.6648000e-01
   2.8685000e-01
   1.9629000e-01
   2.6003000e-01
   1.1055000e-01
   9.6240000e-02
   1.8694000e-01
   1.3407000e-01
   8.7880000e-02
  -6.4510000e-02
   9.8710000e-02
   8.8070000e-02
   3.3420000e-02
  -6.7200000e-03
   1.0940000e-02
   2.6160000e-02
   3.9540000e-02
   1.3870000e-02
   5.5700000e-03
   2.8710000e-02
   3.8300000e-02
  -1.6599000e-01
  -1.3383000e-01
  -1.3062000e-01
  -1.4293000e-01
  -1.8568000e-01
  -9.4620000e-02
  -6.3060000e-02
  -5.9090000e-02
   4.6900000e-03
  -2.4900000e-02
  -3.6220000e-02
  -5.5960000e-02
  -8.8180000e-02
  -3.2020000e-02
  -5.1880000e-02
   1.6700000e-03
  -4.1590000e-02
   8.1020000e-02
   1.8982000e-01
   2.3374000e-01
   2.1578000e-01
   2.4745000e-01
   1.7808000e-01
   1.9626000e-01
   1.2925000e-01
   1.2730000e-01
   1.3545000e-01
   1.8494000e-01
   1.3695000e-01
   1.6138000e-01
   2.9750000e-02
  -4.0090000e-02
   9.3410000e-02
   3.8360000e-02
  -7.2700000e-03
   5.2860000e-02
  -1.2370000e-02
   6.8190000e-02
   1.8180000e-02
  -4.4250000e-02
  -7.0140000e-02
  -2.5469000e-01
  -1.3621000e-01
  -1.5579000e-01
  -1.7855000e-01
  -2.2428000e-01
  -1.7068000e-01
  -1.3331000e-01
  -2.5521000e-01
  -4.3160000e-02
  -1.9330000e-01
  -2.2209000e-01
  -8.8730000e-02
  -1.3660000e-01
  -2.0045000e-01
  -8.7850000e-02
   2.0000000e-03
  -1.2385000e-01
  -2.5330000e-02
   1.2437000e-01
   1.3569000e-01
   1.5272000e-01
   2.7909000e-01
   3.0327000e-01
   2.5019000e-01
   3.5844000e-01
   1.9623000e-01
   1.0795000e-01
   2.7155000e-01
   1.7430000e-01
   1.6029000e-01
   1.1294000e-01
   1.4109000e-01
   9.8810000e-02
   6.7590000e-02
   8.3270000e-02
   9.2780000e-02
   3.5860000e-02
   1.1124000e-01
  -1.3800000e-01
  -9.1910000e-02
  -1.2541000e-01
  -5.5080000e-02
  -1.2404000e-01
  -2.7350000e-01
  -2.5721000e-01
  -2.5301000e-01
  -2.6121000e-01
  -2.9392000e-01
  -2.5576000e-01
  -1.3679000e-01
  -1.7005000e-01
  -9.8540000e-02
  -4.6970000e-02
   4.6310000e-02
   1.2146000e-01
   1.0375000e-01
   1.3078000e-01
   1.5554000e-01
   1.8406000e-01
   1.9708000e-01
   1.5417000e-01
   1.5798000e-01
   1.8036000e-01
   1.4962000e-01
   1.5017000e-01
   3.4790000e-02
   7.8060000e-02
   1.6070000e-01
   1.2881000e-01
   1.8759000e-01
  -1.7850000e-02
   6.2570000e-02
   7.1260000e-02
   1.8530000e-02
  -1.0720000e-02
  -1.1612000e-01
   5.4640000e-02
  -4.2660000e-02
  -7.0740000e-02
  -1.6210000e-01
  -9.0840000e-02
  -1.2330000e-01
  -1.8115000e-01
  -2.0369000e-01
  -2.0558000e-01
  -1.2560000e-01
  -1.1409000e-01
  -2.7170000e-02
   8.8800000e-03
   6.3010000e-02
   1.4500000e-03
   6.3720000e-02
  -5.0230000e-02
   4.3070000e-02
   2.0870000e-02
   3.8660000e-02
   6.3500000e-02
   5.0560000e-02
   1.0759000e-01
   2.9750000e-02
   1.2930000e-01
   4.2770000e-02
   1.0062000e-01
   6.4320000e-02
  -2.3660000e-02
   1.2684000e-01
   8.0900000e-03
   6.1010000e-02
  -4.5320000e-02
   1.2292000e-01
  -5.6230000e-02
   4.6940000e-02
  -1.1790000e-02
   4.0000000e-02
   2.3060000e-02
  -1.3080000e-02
  -9.5960000e-02
   2.4730000e-02
   7.5900000e-03
  -1.4367000e-01
  -5.8150000e-02
  -4.6280000e-02
  -1.0880000e-01
  -5.8870000e-02
  -2.3900000e-03
   1.2917000e-01
   1.2209000e-01
   1.2196000e-01
   1.4123000e-01
   4.9520000e-02
  -3.0600000e-02
   1.1230000e-01
   3.1560000e-02
  -1.0682000e-01
   2.8980000e-02
   4.0500000e-02
  -9.2510000e-02
  -1.6510000e-02
   9.6000000e-03
  -1.0290000e-01
   4.1210000e-02
  -6.3940000e-02
  -1.3114000e-01
  -1.8324000e-01
  -1.4877000e-01
  -8.3350000e-02
  -8.3840000e-02
  -8.6810000e-02
  -7.6410000e-02
  -1.1957000e-01
  -1.8700000e-02
  -7.8330000e-02
   1.8670000e-02
  -4.4200000e-02
   7.6090000e-02
  -1.1790000e-02
   1.0780000e-02
   2.2006000e-01
   2.0709000e-01
   1.2533000e-01
   2.9071000e-01
   1.9042000e-01
   1.9730000e-01
   2.5907000e-01
   2.5085000e-01
   1.9072000e-01
   2.6050000e-01
   1.9014000e-01
   1.6720000e-01
   1.2873000e-01
   1.5563000e-01
  -1.4450000e-02
   6.6240000e-02
   8.3490000e-02
  -2.8190000e-02
  -4.9570000e-02
  -1.9716000e-01
  -6.0240000e-02
  -1.3923000e-01
  -2.4328000e-01
  -1.7098000e-01
  -2.0292000e-01
  -2.3399000e-01
  -7.2690000e-02
  -1.6086000e-01
  -1.7846000e-01
  -2.2614000e-01
  -9.0560000e-02
  -8.4390000e-02
  -1.3989000e-01
  -1.7361000e-01
  -1.4902000e-01
  -1.1719000e-01
   1.8890000e-02
   1.6940000e-02
   1.3813000e-01
   1.6689000e-01
   1.0638000e-01
   2.5990000e-01
   1.9941000e-01
   2.3887000e-01
   2.4427000e-01
   2.6121000e-01
   2.2502000e-01
   1.9659000e-01
   2.7177000e-01
   2.3256000e-01
   2.6020000e-01
   1.8384000e-01
   1.9234000e-01
   2.6694000e-01
   3.2080000e-02
  -2.3420000e-02
   3.6270000e-02
  -9.8270000e-02
  -1.3306000e-01
  -1.5014000e-01
  -1.2278000e-01
  -1.4674000e-01
  -2.2639000e-01
  -1.4784000e-01
  -2.1904000e-01
  -2.5450000e-01
  -1.8455000e-01
  -1.9952000e-01
  -1.5247000e-01
  -1.3758000e-01
  -1.7257000e-01
  -1.4504000e-01
   6.2460000e-02
   1.6180000e-02
  -7.6440000e-02
   4.8860000e-02
   9.7770000e-02
  -5.0420000e-02
   1.0090000e-01
   7.3970000e-02
   1.2234000e-01
   1.3542000e-01
   9.8050000e-02
   5.7720000e-02
   1.1466000e-01
   9.3000000e-02
   8.7410000e-02
   1.8422000e-01
   5.4590000e-02
   8.9550000e-02
   7.4910000e-02
   9.8900000e-02
   8.0010000e-02
   3.3500000e-03
   1.0471000e-01
   1.8180000e-02
   1.1233000e-01
   4.8940000e-02
   7.0080000e-02
  -5.1330000e-02
  -5.7060000e-02
   1.8370000e-02
  -1.9313000e-01
  -1.2815000e-01
  -2.3585000e-01
  -1.5469000e-01
  -9.2020000e-02
  -1.8365000e-01
  -3.5100000e-02
  -3.2183000e-01
  -1.2185000e-01
  -1.9135000e-01
  -6.9260000e-02
   5.4800000e-03
  -3.6490000e-02
   1.4156000e-01
  -4.6750000e-02
   1.0786000e-01
  -6.2380000e-02
  -1.0945000e-01
  -7.7180000e-02
  -2.0193000e-01
  -4.3510000e-02
  -9.3440000e-02
  -6.7260000e-02
  -9.8350000e-02
   5.4920000e-02
   1.9930000e-02
   5.3500000e-03
  -5.3160000e-02
  -2.4070000e-02
   4.1890000e-02
  -5.5900000e-03
   8.4420000e-02
   7.3800000e-03
   1.0644000e-01
   1.0194000e-01
   2.8710000e-02
   6.3200000e-02
   1.5170000e-01
   2.1542000e-01
   1.1614000e-01
   1.9598000e-01
   2.1296000e-01
   1.5590000e-01
   1.7060000e-01
   9.5610000e-02
   1.4844000e-01
   1.1400000e-01
   1.1329000e-01
   8.5460000e-02
   5.6590000e-02
   8.9360000e-02
  -5.2810000e-02
   7.3100000e-02
  -9.9340000e-02
  -1.9174000e-01
  -1.9160000e-01
  -2.7056000e-01
  -2.6143000e-01
  -1.9146000e-01
  -1.8365000e-01
  -2.9003000e-01
  -1.8683000e-01
  -1.9609000e-01
  -1.8271000e-01
  -1.6443000e-01
  -8.9770000e-02
  -6.1250000e-02
  -9.3630000e-02
   7.0770000e-02
   1.7693000e-01
   2.2521000e-01
   1.4458000e-01
   1.8000000e-01
   2.2609000e-01
   2.0169000e-01
   1.6286000e-01
   2.2423000e-01
   1.3608000e-01
   2.6626000e-01
   3.4621000e-01
   3.0366000e-01
   1.8060000e-01
   3.3765000e-01
   2.1658000e-01
   8.9490000e-02
   1.0597000e-01
  -1.0340000e-02
  -5.4730000e-02
  -2.7940000e-02
  -1.0139000e-01
  -8.2310000e-02
  -1.6588000e-01
  -1.6166000e-01
  -1.4488000e-01
  -1.2102000e-01
  -1.3235000e-01
  -2.7437000e-01
  -1.3427000e-01
  -1.6264000e-01
  -2.2546000e-01
  -2.3747000e-01
  -1.3712000e-01
  -1.7701000e-01
  -2.1032000e-01
  -1.8707000e-01
  -9.7170000e-02
  -8.3790000e-02
  -3.9950000e-02
   2.4540000e-02
   6.6320000e-02
   8.4830000e-02
   9.8100000e-02
   1.2741000e-01
   1.1425000e-01
   1.7443000e-01
   2.2146000e-01
   2.7832000e-01
   1.8858000e-01
   2.7999000e-01
   1.1894000e-01
   1.1891000e-01
   3.9430000e-02
   3.4770000e-02
   6.7150000e-02
  -1.1020000e-02
  -5.7280000e-02
   4.4250000e-02
   7.6660000e-02
  -7.9180000e-02
   7.6200000e-03
   5.1410000e-02
  -1.0800000e-02
  -3.4190000e-02
   3.3200000e-02
   4.7520000e-02
  -2.0100000e-02
   1.3791000e-01
   9.8460000e-02
   2.5360000e-02
   2.7090000e-02
  -1.3811000e-01
  -3.4740000e-02
  -6.6980000e-02
  -3.5810000e-02
  -9.5330000e-02
  -7.0050000e-02
   6.7610000e-02
  -1.1710000e-02
  -7.0200000e-03
  -2.8650000e-02
   1.5680000e-02
  -7.5150000e-02
  -1.0540000e-01
  -6.3420000e-02
  -5.5660000e-02
  -9.3360000e-02
  -8.5960000e-02
  -5.9360000e-02
   3.3450000e-02
  -1.0062000e-01
  -1.5930000e-02
  -8.5710000e-02
  -5.3770000e-02
  -5.5900000e-03
   4.1350000e-02
  -2.1700000e-03
   5.8460000e-02
   1.5376000e-01
   5.1410000e-02
   1.1244000e-01
   1.4658000e-01
   5.2090000e-02
   1.1768000e-01
   2.0451000e-01
   2.6299000e-01
   1.6358000e-01
   1.0712000e-01
   1.7589000e-01
   6.8600000e-02
  -4.6060000e-02
   8.1080000e-02
   7.4520000e-02
  -8.0250000e-02
   2.7390000e-02
   1.2316000e-01
   3.2900000e-03
  -7.2400000e-03
   1.8299000e-01
   1.2690000e-02
  -6.2100000e-02
   8.7570000e-02
   3.0570000e-02
  -1.8071000e-01
  -2.0536000e-01
  -1.9023000e-01
  -2.4320000e-01
  -1.7835000e-01
  -2.3826000e-01
  -2.6952000e-01
  -4.0660000e-02
  -1.6363000e-01
  -7.7290000e-02
  -5.2310000e-02
  -3.4600000e-02
  -1.2215000e-01
   2.1400000e-03
   1.2069000e-01
  -1.2220000e-01
  -3.2080000e-02
   2.0372000e-01
   2.2861000e-01
   2.0978000e-01
   2.2373000e-01
   2.8180000e-01
   1.8049000e-01
   2.2710000e-01
   2.6807000e-01
   2.2765000e-01
   2.1227000e-01
   2.6305000e-01
   1.8129000e-01
   1.8477000e-01
   2.1649000e-01
   6.5390000e-02
   1.3199000e-01
   1.0057000e-01
  -6.9500000e-02
  -7.8530000e-02
  -1.5560000e-01
  -1.5116000e-01
  -2.4734000e-01
  -2.0756000e-01
  -2.5049000e-01
  -2.2115000e-01
  -2.2044000e-01
  -2.4827000e-01
  -1.5519000e-01
  -2.7849000e-01
  -1.9130000e-01
  -1.1814000e-01
  -2.3719000e-01
  -2.0953000e-01
  -7.5620000e-02
  -6.5170000e-02
  -7.2440000e-02
  -8.6750000e-02
   4.7300000e-02
   6.8740000e-02
   1.1417000e-01
   1.9448000e-01
   1.6136000e-01
   1.3339000e-01
   6.0790000e-02
   3.2663000e-01
   2.3569000e-01
   2.6494000e-01
   3.3601000e-01
   3.1196000e-01
   4.0919000e-01
   3.4308000e-01
   2.5200000e-01
   2.5419000e-01
   1.7819000e-01
   2.2784000e-01
  -8.4700000e-03
   9.4600000e-03
  -1.3410000e-01
  -1.7822000e-01
  -1.2102000e-01
  -1.3377000e-01
  -9.4400000e-02
  -1.5140000e-01
  -2.6862000e-01
  -7.7040000e-02
  -1.0775000e-01
  -1.9176000e-01
  -1.1554000e-01
  -5.2830000e-02
   3.3940000e-02
  -1.7347000e-01
  -1.0586000e-01
   3.6470000e-02
  -1.0910000e-02
  -5.7360000e-02
  -1.9911000e-01
   4.4000000e-04
  -4.9110000e-02
  -1.9911000e-01
  -8.4060000e-02
  -5.5660000e-02
  -7.6500000e-03
  -3.4630000e-02
   3.3890000e-02
   4.4910000e-02
  -9.4670000e-02
   5.0590000e-02
   8.2800000e-03
   3.2850000e-02
   5.1240000e-02
   5.3820000e-02
   6.5530000e-02
   1.0753000e-01
  -2.9600000e-03
   2.4180000e-02
   2.3360000e-02
   7.5180000e-02
  -4.3300000e-03
   2.8000000e-03
   9.7720000e-02
   1.2771000e-01
   2.1559000e-01
   2.1926000e-01
   1.5313000e-01
   1.0764000e-01
   4.7130000e-02
  -2.5000000e-04
  -9.2760000e-02
  -6.8000000e-02
  -9.7660000e-02
  -1.0901000e-01
  -2.1792000e-01
  -1.3970000e-01
  -2.0868000e-01
  -1.7863000e-01
  -1.6972000e-01
  -2.6053000e-01
  -1.5768000e-01
  -2.5740000e-01
  -2.4731000e-01
  -2.4462000e-01
  -1.6969000e-01
  -1.4578000e-01
  -1.0674000e-01
  -1.4680000e-01
  -2.1682000e-01
  -3.8330000e-02
  -1.0940000e-02
  -1.2714000e-01
  -3.1340000e-02
  -1.1080000e-02
  -5.7110000e-02
   2.5000000e-04
   6.7750000e-02
   2.2894000e-01
   1.4260000e-01
   2.7185000e-01
   3.4755000e-01
   2.6055000e-01
   2.3127000e-01
   4.2339000e-01
   2.3135000e-01
   3.1048000e-01
   2.9217000e-01
   2.7380000e-01
   1.7783000e-01
   1.2149000e-01
   3.9780000e-02
  -2.3660000e-02
   5.5630000e-02
   4.2200000e-03
  -5.3380000e-02
  -1.8998000e-01
  -1.1453000e-01
  -8.2250000e-02
  -2.2891000e-01
  -1.6322000e-01
  -2.1320000e-01
  -2.7193000e-01
  -1.9283000e-01
  -1.8425000e-01
  -2.7637000e-01
  -2.4704000e-01
  -9.0120000e-02
  -2.2283000e-01
  -1.9645000e-01
  -8.2360000e-02
  -9.3880000e-02
   2.1759000e-01
   4.1100000e-02
   1.2884000e-01
   1.2039000e-01
   1.7877000e-01
   1.4293000e-01
   1.7753000e-01
   2.5052000e-01
   1.1979000e-01
   2.3355000e-01
   1.8894000e-01
   1.7474000e-01
   1.6678000e-01
   8.2830000e-02
   2.4021000e-01
   7.5240000e-02
  -1.5190000e-02
   1.3734000e-01
   2.1090000e-01
   2.4570000e-02
   5.1160000e-02
   1.0822000e-01
   7.5150000e-02
  -1.5922000e-01
   6.3500000e-02
  -6.6240000e-02
  -1.1406000e-01
  -6.1220000e-02
  -3.2110000e-02
  -3.0490000e-02
  -2.2077000e-01
  -1.7627000e-01
   1.5660000e-02
   2.7690000e-02
  -5.0200000e-02
  -6.2130000e-02
  -6.0540000e-02
   4.1000000e-04
   6.1200000e-02
   4.0390000e-02
   9.3500000e-03
   2.8380000e-02
   3.6660000e-02
   1.2621000e-01
  -6.8410000e-02
  -5.3000000e-02
  -6.9370000e-02
  -1.9453000e-01
  -9.1580000e-02
  -6.2430000e-02
  -7.3260000e-02
  -1.2401000e-01
   5.3930000e-02
  -5.9500000e-03
  -3.9560000e-02
   9.1490000e-02
  -4.8090000e-02
   1.7098000e-01
   5.8920000e-02
   7.2880000e-02
   2.0588000e-01
   3.1054000e-01
   2.6209000e-01
   2.6955000e-01
   3.0300000e-01
   2.2222000e-01
   1.9099000e-01
   2.8605000e-01
   1.6163000e-01
   1.4411000e-01
   2.3854000e-01
   1.0117000e-01
  -2.9300000e-03
   1.1050000e-01
  -3.2710000e-02
  -7.3970000e-02
  -6.4300000e-02
  -1.4567000e-01
  -2.3355000e-01
  -1.2064000e-01
  -1.0219000e-01
  -3.0344000e-01
  -1.9859000e-01
  -2.5134000e-01
  -2.3703000e-01
  -1.7644000e-01
  -1.8255000e-01
  -2.3245000e-01
  -1.9324000e-01
  -8.9680000e-02
  -2.7067000e-01
  -1.5030000e-02
   1.0780000e-02
   5.5580000e-02
  -4.5020000e-02
   9.5830000e-02
   1.9889000e-01
   7.2440000e-02
   2.8838000e-01
   2.0002000e-01
   1.9615000e-01
   1.9991000e-01
   2.6321000e-01
   2.4290000e-01
   1.6330000e-01
   2.3434000e-01
   1.8104000e-01
   5.9630000e-02
   1.3473000e-01
   1.3605000e-01
   6.3310000e-02
  -3.7590000e-02
   5.4010000e-02
   3.9430000e-02
  -1.3051000e-01
  -6.2100000e-02
  -9.3910000e-02
  -7.8500000e-02
  -1.8984000e-01
  -1.5892000e-01
  -2.2176000e-01
  -2.2850000e-01
  -1.4715000e-01
  -1.9807000e-01
  -1.8814000e-01
  -1.6067000e-01
  -2.5222000e-01
  -1.4957000e-01
  -1.8430000e-01
  -1.1823000e-01
  -2.5633000e-01
  -1.8463000e-01
  -1.3268000e-01
  -1.5244000e-01
  -1.3043000e-01
  -1.7432000e-01
   2.9450000e-02
  -1.0718000e-01
  -3.5730000e-02
   1.7550000e-02
   3.5780000e-02
  -4.2280000e-02
   4.5100000e-02
  -1.8400000e-03
   1.1069000e-01
   1.4266000e-01
   8.7550000e-02
   6.3250000e-02
   1.5434000e-01
   5.9030000e-02
   1.3608000e-01
   1.3520000e-02
   6.1940000e-02
   4.1730000e-02
   2.0020000e-02
   2.9940000e-02
  -4.9000000e-04
   1.0460000e-01
  -8.8090000e-02
   4.9820000e-02
  -3.1170000e-02
  -9.6210000e-02
   1.3300000e-02
  -1.4578000e-01
  -1.3320000e-01
  -1.9908000e-01
  -1.4430000e-01
  -2.5598000e-01
  -1.7759000e-01
  -9.6730000e-02
  -2.3665000e-01
  -1.6410000e-01
  -1.2607000e-01
  -1.4617000e-01
  -1.4910000e-01
  -1.3366000e-01
  -1.7542000e-01
  -5.1630000e-02
  -1.3065000e-01
  -6.0480000e-02
  -7.6940000e-02
  -1.0038000e-01
  -6.6710000e-02
   1.0450000e-02
  -3.6080000e-02
  -7.6390000e-02
  -7.5100000e-02
   4.5840000e-02
  -5.2100000e-03
   4.7730000e-02
   8.6940000e-02
   6.1200000e-02
   1.1211000e-01
   2.3188000e-01
   1.7945000e-01
   4.7760000e-02
   2.0043000e-01
   1.4617000e-01
   1.4044000e-01
   8.8150000e-02
   1.1195000e-01
   8.5300000e-02
  -2.7030000e-02
  -3.5780000e-02
   6.0000000e-03
  -1.2010000e-02
  -5.1680000e-02
  -1.6221000e-01
  -3.0160000e-02
  -8.7600000e-02
  -7.2990000e-02
  -2.9530000e-02
  -2.0917000e-01
  -1.7386000e-01
  -7.4800000e-02
  -1.4918000e-01
  -1.7901000e-01
  -1.5700000e-01
  -1.1425000e-01
  -2.1860000e-01
  -4.6750000e-02
  -1.0290000e-01
  -2.3596000e-01
  -9.1910000e-02
  -1.3331000e-01
  -9.9140000e-02
  -1.8332000e-01
  -5.3880000e-02
  -1.4180000e-02
  -6.8050000e-02
   6.2650000e-02
   4.5840000e-02
   1.5066000e-01
   1.3882000e-01
   8.4750000e-02
   1.7737000e-01
   1.8195000e-01
   1.5587000e-01
   8.8830000e-02
   8.1270000e-02
   1.4235000e-01
   1.2135000e-01
   9.0480000e-02
   6.7970000e-02
   1.1710000e-01
   8.2690000e-02
   1.6659000e-01
   1.1236000e-01
  -2.2000000e-04
   9.8730000e-02
   7.9730000e-02
  -3.9320000e-02
  -1.0435000e-01
   7.3730000e-02
  -1.2793000e-01
  -1.5198000e-01
   1.2560000e-02
   2.4570000e-02
  -2.2590000e-02
  -1.4639000e-01
   1.1644000e-01
  -1.4373000e-01
  -1.1787000e-01
  -6.8960000e-02
  -1.6742000e-01
  -1.3709000e-01
  -1.1897000e-01
  -9.3170000e-02
  -1.2305000e-01
  -1.4060000e-01
  -4.2140000e-02
  -1.0194000e-01
   6.6680000e-02
  -6.6850000e-02
   1.3600000e-02
   4.5430000e-02
   2.6430000e-02
   6.0400000e-02
   5.3000000e-02
   1.6317000e-01
   5.8590000e-02
   7.6220000e-02
   2.2159000e-01
   1.5083000e-01
   1.8304000e-01
   1.4987000e-01
   1.4381000e-01
   1.7638000e-01
   1.9300000e-01
   1.7890000e-01
   1.1650000e-01
   5.4620000e-02
   1.0350000e-01
   4.0030000e-02
  -4.5500000e-03
   4.9930000e-02
  -2.5960000e-02
  -5.2970000e-02
  -3.1450000e-02
  -6.4600000e-02
  -7.9590000e-02
  -8.3600000e-02
  -1.4992000e-01
  -1.2527000e-01
  -9.5630000e-02
  -6.4130000e-02
  -1.8389000e-01
  -1.0863000e-01
  -1.3087000e-01
  -1.7882000e-01
  -9.8680000e-02
  -1.6275000e-01
  -1.1631000e-01
  -1.3972000e-01
  -1.2135000e-01
  -1.4205000e-01
  -9.0180000e-02
  -7.9500000e-03
   4.3900000e-03
   8.2000000e-04
   7.3950000e-02
   7.8800000e-02
   5.6730000e-02
   1.2996000e-01
   7.1100000e-02
   2.0540000e-02
   2.0443000e-01
   1.4041000e-01
   1.3199000e-01
   1.4798000e-01
   2.2562000e-01
   1.2911000e-01
   1.3898000e-01
   2.0580000e-01
   1.4858000e-01
   1.2719000e-01
   6.0680000e-02
   6.2980000e-02
   2.9120000e-02
   1.5600000e-02
  -3.2790000e-02
  -1.5930000e-02
  -5.4290000e-02
  -1.0679000e-01
  -3.1340000e-02
  -7.8090000e-02
  -1.5565000e-01
  -1.0633000e-01
  -1.3920000e-01
  -4.4500000e-02
  -1.4477000e-01
  -8.5080000e-02
  -1.4230000e-01
  -8.5960000e-02
  -1.6256000e-01
  -1.5009000e-01
  -1.9527000e-01
  -7.3560000e-02
  -2.1674000e-01
  -1.2193000e-01
  -9.8160000e-02
  -9.3820000e-02
   3.7340000e-02
  -7.8960000e-02
   2.9640000e-02
   2.0100000e-02
   9.8950000e-02
   9.0840000e-02
   8.5650000e-02
   1.1206000e-01
   1.5085000e-01
   2.1658000e-01
   2.2009000e-01
   1.4565000e-01
   2.4169000e-01
   2.6576000e-01
   1.1313000e-01
   2.3360000e-01
   1.7490000e-01
   1.1768000e-01
   1.1485000e-01
   7.9270000e-02
   9.3000000e-02
  -3.3640000e-02
   4.0170000e-02
   4.8940000e-02
  -1.2486000e-01
  -1.2420000e-02
  -4.4770000e-02
  -2.4620000e-02
  -1.4071000e-01
  -1.8162000e-01
  -3.0400000e-03
  -1.8770000e-01
  -1.4411000e-01
  -1.5321000e-01
  -1.9845000e-01
  -2.1392000e-01
  -1.9346000e-01
  -1.2220000e-01
  -2.1789000e-01
  -1.6805000e-01
  -4.0520000e-02
  -1.7515000e-01
  -4.9130000e-02
   6.6320000e-02
  -7.8400000e-03
  -4.3000000e-03
   2.2620000e-02
   1.1502000e-01
   8.0120000e-02
   3.7620000e-02
   1.2138000e-01
   1.3492000e-01
   1.2749000e-01
   1.6234000e-01
   1.8913000e-01
   9.8460000e-02
   1.5486000e-01
   2.0725000e-01
   1.4087000e-01
   6.4130000e-02
   1.3498000e-01
   2.3914000e-01
   8.1570000e-02
   1.5752000e-01
   1.2681000e-01
   8.1430000e-02
  -3.2100000e-03
   1.2060000e-02
   4.6280000e-02
  -9.2400000e-03
  -2.4460000e-02
  -7.4280000e-02
  -1.7040000e-01
  -7.6800000e-02
  -1.6053000e-01
  -7.7320000e-02
  -2.5123000e-01
  -1.3898000e-01
  -7.2300000e-02
  -1.6344000e-01
  -1.3989000e-01
  -2.0766000e-01
  -6.3860000e-02
  -1.4529000e-01
  -1.0433000e-01
  -1.7644000e-01
  -6.4540000e-02
  -1.3295000e-01
  -6.3830000e-02
   3.2900000e-03
  -9.2730000e-02
   2.2620000e-02
   1.2648000e-01
   4.1510000e-02
   4.1840000e-02
   7.4060000e-02
   4.6860000e-02
   1.1516000e-01
   1.3342000e-01
   1.9958000e-01
   1.0816000e-01
   1.7608000e-01
   2.2612000e-01
   1.9110000e-01
   2.0865000e-01
   1.2388000e-01
   2.2757000e-01
   1.0065000e-01
   1.0951000e-01
   1.3649000e-01
   3.7510000e-02
   6.2270000e-02
   2.0540000e-02
   5.8070000e-02
  -2.9610000e-02
  -1.4200000e-02
  -4.0220000e-02
  -1.9311000e-01
  -3.3970000e-02
  -1.1913000e-01
  -1.4822000e-01
  -2.2066000e-01
  -1.4277000e-01
  -1.9256000e-01
  -2.6428000e-01
  -6.2050000e-02
  -2.0248000e-01
  -1.1422000e-01
  -1.4707000e-01
  -8.3930000e-02
  -1.6860000e-02
  -1.2440000e-01
  -3.1420000e-02
  -5.3700000e-03
  -5.9960000e-02
  -5.0700000e-03
  -4.2580000e-02
   9.6840000e-02
  -9.6290000e-02
   9.2650000e-02
   1.6755000e-01
   6.9040000e-02
   1.5527000e-01
   2.0871000e-01
   1.7814000e-01
   1.5069000e-01
   2.6711000e-01
   1.8258000e-01
   1.2470000e-01
   2.8060000e-01
   1.8740000e-01
   7.6770000e-02
   1.4389000e-01
   1.0479000e-01
   4.7930000e-02
   2.3900000e-03
  -2.8320000e-02
  -4.1210000e-02
  -4.0360000e-02
  -2.6070000e-02
  -1.3139000e-01
  -3.8990000e-02
  -3.4250000e-02
  -1.3720000e-01
  -1.2985000e-01
  -1.0529000e-01
  -7.5130000e-02
  -1.1132000e-01
  -4.7080000e-02
  -2.1581000e-01
  -9.9030000e-02
  -1.2675000e-01
  -1.8145000e-01
  -1.1823000e-01
  -2.1638000e-01
  -1.1011000e-01
  -1.1050000e-01
  -1.4767000e-01
  -3.2960000e-02
  -6.0160000e-02
   4.8010000e-02
   7.9870000e-02
   9.1550000e-02
   4.6530000e-02
   6.2600000e-02
   2.0237000e-01
   1.1395000e-01
   1.5519000e-01
   2.0618000e-01
   1.1274000e-01
   1.6158000e-01
   1.9143000e-01
   1.6977000e-01
   1.4279000e-01
   2.2529000e-01
   1.7904000e-01
   1.0501000e-01
   1.6662000e-01
   1.1346000e-01
   7.0220000e-02
   4.5760000e-02
   4.9740000e-02
   3.2710000e-02
  -1.9820000e-02
  -4.7130000e-02
  -1.5080000e-02
  -1.6073000e-01
  -1.1343000e-01
  -1.0923000e-01
  -1.7509000e-01
  -1.4416000e-01
  -8.9790000e-02
  -1.4751000e-01
  -1.7032000e-01
  -5.2530000e-02
  -1.7712000e-01
  -1.8071000e-01
  -6.1800000e-02
  -1.3394000e-01
  -1.7071000e-01
  -1.1299000e-01
  -4.1950000e-02
  -1.4841000e-01
  -2.3360000e-02
  -2.4050000e-02
  -1.6640000e-02
  -4.8200000e-02
   6.7810000e-02
   3.6900000e-02
   7.9160000e-02
   1.2574000e-01
   1.9028000e-01
   1.5299000e-01
   2.1904000e-01
   1.7402000e-01
   1.9908000e-01
   2.3911000e-01
   1.8469000e-01
   2.3325000e-01
   1.5812000e-01
   1.4438000e-01
   1.5382000e-01
   1.8324000e-01
   3.1060000e-02
   9.6650000e-02
  -3.0400000e-03
  -8.9900000e-03
  -2.9100000e-03
   2.4870000e-02
  -1.1623000e-01
  -8.5330000e-02
  -3.4600000e-02
  -1.3424000e-01
  -1.7820000e-02
  -8.2450000e-02
  -1.6487000e-01
  -1.2791000e-01
  -1.8063000e-01
  -9.6510000e-02
  -1.7356000e-01
  -1.9788000e-01
  -1.5110000e-01
  -1.5327000e-01
  -1.9708000e-01
  -2.8820000e-02
   7.7000000e-03
   8.4750000e-02
   1.3248000e-01
   2.1962000e-01
   1.6094000e-01
   3.0571000e-01
   2.4328000e-01
   2.8781000e-01
   3.1139000e-01
   2.1211000e-01
   1.5842000e-01
   9.8070000e-02
   1.2749000e-01
   1.2632000e-01
   1.6171000e-01
   1.6075000e-01
   1.6073000e-01
   1.5478000e-01
   7.1340000e-02
   1.9080000e-01
   2.1279000e-01
   1.4140000e-01
   1.0912000e-01
   1.8729000e-01
   1.5373000e-01
   4.1020000e-02
   1.1538000e-01
   1.1283000e-01
  -2.4320000e-02
  -1.8670000e-02
   1.2341000e-01
   6.9180000e-02
  -1.7049000e-01
  -5.4890000e-02
  -2.4487000e-01
  -2.3251000e-01
  -1.2845000e-01
  -1.9588000e-01
  -1.5642000e-01
  -1.6717000e-01
  -1.2800000e-02
  -8.2670000e-02
  -1.0657000e-01
  -5.7960000e-02
  -1.1315000e-01
  -1.3210000e-01
  -5.9940000e-02
  -1.5502000e-01
  -6.6650000e-02
  -1.2516000e-01
   2.1990000e-02
  -1.6262000e-01
  -1.9220000e-02
   1.1132000e-01
  -1.5875000e-01
   1.4910000e-01
   1.3257000e-01
   1.8971000e-01
   1.0775000e-01
   2.7799000e-01
   3.3047000e-01
   3.2652000e-01
   4.4204000e-01
   4.2249000e-01
   4.0351000e-01
   2.9464000e-01
   2.0736000e-01
   1.6473000e-01
   2.0059000e-01
   2.7415000e-01
   1.7850000e-02
  -4.4800000e-02
  -3.7700000e-02
  -6.1390000e-02
  -2.6790000e-02
   1.5240000e-02
  -1.3975000e-01
  -8.5190000e-02
  -3.2330000e-02
  -1.6742000e-01
  -1.0268000e-01
  -1.2656000e-01
  -1.8853000e-01
  -3.6047000e-01
  -2.2022000e-01
  -2.3157000e-01
  -3.2035000e-01
  -2.3944000e-01
  -1.7805000e-01
  -1.9239000e-01
  -1.3673000e-01
   4.0220000e-02
  -5.6430000e-02
   5.4070000e-02
   1.9486000e-01
   1.8795000e-01
   1.9470000e-01
   3.2565000e-01
   3.3231000e-01
   2.6826000e-01
   2.6705000e-01
   2.8046000e-01
   3.5010000e-02
   1.7175000e-01
   1.4776000e-01
   1.6651000e-01
   1.6555000e-01
   2.2779000e-01
   1.4704000e-01
   1.0943000e-01
   1.0965000e-01
   1.6012000e-01
   9.6020000e-02
   4.4500000e-02
   6.6960000e-02
  -8.2970000e-02
   4.6670000e-02
  -4.7100000e-02
  -7.0270000e-02
  -1.2319000e-01
  -1.3865000e-01
  -1.1039000e-01
  -1.1368000e-01
  -2.2595000e-01
  -8.9790000e-02
  -6.8440000e-02
  -8.9270000e-02
  -1.0131000e-01
   1.1474000e-01
   4.8500000e-03
   3.0490000e-02
   1.3037000e-01
  -6.0540000e-02
  -3.9150000e-02
   8.3240000e-02
   2.5010000e-02
  -5.0420000e-02
  -1.7880000e-02
  -9.6500000e-03
  -1.7929000e-01
  -3.6820000e-02
   1.0973000e-01
  -5.7910000e-02
   9.4590000e-02
   1.6160000e-01
   7.9680000e-02
   7.9540000e-02
   1.7358000e-01
   1.4255000e-01
   1.6604000e-01
   7.1120000e-02
   1.2692000e-01
   3.6440000e-02
   1.7175000e-01
   8.5500000e-03
   8.4500000e-02
   1.1636000e-01
  -1.6670000e-02
   2.3755000e-01
   1.1699000e-01
   1.6942000e-01
   1.1916000e-01
   2.2381000e-01
   1.0304000e-01
   1.4416000e-01
   8.2830000e-02
   3.0680000e-02
   1.4370000e-02
  -3.5100000e-03
   6.8330000e-02
  -1.0967000e-01
  -3.0200000e-03
  -1.3002000e-01
  -9.7100000e-03
  -1.8175000e-01
  -1.7674000e-01
  -2.1589000e-01
  -1.5286000e-01
  -1.7046000e-01
  -2.1608000e-01
  -1.7868000e-01
  -1.8713000e-01
  -1.4126000e-01
  -1.0699000e-01
  -4.6060000e-02
  -1.2856000e-01
  -5.7220000e-02
   5.5900000e-03
  -1.8510000e-02
  -8.0900000e-03
   4.4060000e-02
   1.0893000e-01
   1.3868000e-01
   2.0862000e-01
   3.3727000e-01
   2.4676000e-01
   3.4832000e-01
   3.7980000e-01
   3.4185000e-01
   2.7728000e-01
   3.6839000e-01
   2.9740000e-01
   2.0391000e-01
   2.7117000e-01
   1.8255000e-01
   1.5151000e-01
   1.3427000e-01
   1.1148000e-01
  -2.3550000e-02
   4.8970000e-02
  -2.4480000e-02
  -1.1450000e-01
  -6.0790000e-02
  -1.0090000e-01
  -2.4652000e-01
  -2.3478000e-01
  -2.1216000e-01
  -3.3217000e-01
  -2.7654000e-01
  -2.7254000e-01
  -3.2759000e-01
  -2.7580000e-01
  -2.0347000e-01
  -1.5283000e-01
  -2.3782000e-01
  -6.6020000e-02
  -1.5881000e-01
  -1.1540000e-01
   1.4500000e-02
   8.6900000e-03
  -2.7200000e-02
   2.5280000e-02
   9.6900000e-02
   5.8100000e-02
   2.8160000e-02
   1.2031000e-01
   9.0590000e-02
   1.7358000e-01
   1.0194000e-01
   1.2349000e-01
   1.0167000e-01
   2.9305000e-01
   3.3648000e-01
   3.0198000e-01
   2.5392000e-01
   1.6311000e-01
   2.1219000e-01
   1.4707000e-01
   2.3643000e-01
   2.4816000e-01
   1.5689000e-01
   6.5000000e-03
  -2.8950000e-02
  -4.7050000e-02
  -2.3281000e-01
  -1.5346000e-01
  -3.0925000e-01
  -1.6722000e-01
  -2.3234000e-01
  -2.4841000e-01
  -8.9770000e-02
  -1.7783000e-01
  -2.3591000e-01
  -1.7715000e-01
  -8.4170000e-02
  -2.3643000e-01
  -3.1295000e-01
  -1.2664000e-01
  -3.4624000e-01
  -1.7729000e-01
  -1.5351000e-01
  -2.8836000e-01
  -1.1595000e-01
  -9.0480000e-02
  -4.8150000e-02
  -5.2400000e-03
   1.0446000e-01
   7.0330000e-02
   1.3460000e-01
   3.7278000e-01
   3.3938000e-01
   4.0285000e-01
   2.9041000e-01
   3.7217000e-01
   3.1948000e-01
   3.9935000e-01
   3.0708000e-01
   3.1468000e-01
   3.4020000e-01
   3.0368000e-01
   3.0728000e-01
   1.7076000e-01
   1.8976000e-01
   9.0320000e-02
   1.3032000e-01
  -3.1420000e-02
  -6.8000000e-03
  -3.7620000e-02
  -1.8565000e-01
  -6.0680000e-02
  -1.8066000e-01
  -2.2321000e-01
  -2.6069000e-01
  -2.2022000e-01
  -2.6818000e-01
  -2.7706000e-01
  -2.0788000e-01
  -3.2260000e-01
  -1.1214000e-01
  -1.8603000e-01
  -1.8803000e-01
  -4.1370000e-02
  -1.9470000e-02
   6.0210000e-02
   7.9540000e-02
   8.0610000e-02
   5.8780000e-02
   3.7920000e-02
   1.3994000e-01
   9.1300000e-03
   8.3300000e-02
   1.3997000e-01
   6.5230000e-02
   1.9127000e-01
   1.3605000e-01
   2.5504000e-01
   1.6314000e-01
   1.8184000e-01
   2.4866000e-01
   2.2003000e-01
   2.6321000e-01
   1.8869000e-01
   1.9752000e-01
   1.9300000e-01
   1.4329000e-01
   9.1770000e-02
  -5.4840000e-02
   5.4510000e-02
  -2.7530000e-02
  -2.0462000e-01
   8.0900000e-03
  -7.3010000e-02
  -1.4921000e-01
  -1.1357000e-01
  -9.6210000e-02
  -7.8530000e-02
  -2.3459000e-01
  -6.6110000e-02
  -2.8518000e-01
  -1.3279000e-01
  -1.6470000e-01
  -2.4043000e-01
  -1.2952000e-01
  -2.4860000e-01
  -1.6445000e-01
  -1.0172000e-01
  -1.2634000e-01
  -1.9710000e-02
  -8.4450000e-02
  -1.1044000e-01
  -1.6511000e-01
   5.0230000e-02
   6.7200000e-02
   9.0180000e-02
   1.5127000e-01
   1.3512000e-01
   1.1409000e-01
   1.2837000e-01
   1.1502000e-01
   1.8430000e-01
   1.9187000e-01
   1.1694000e-01
   1.9313000e-01
   1.0117000e-01
   1.3322000e-01
   9.7090000e-02
   1.0082000e-01
   1.2283000e-01
   1.2610000e-01
   2.0210000e-02
   7.5370000e-02
   1.1082000e-01
   2.0320000e-02
   5.5300000e-02
   4.6100000e-03
  -6.9860000e-02
  -1.0693000e-01
  -2.7860000e-02
  -2.7500000e-02
  -9.8020000e-02
  -6.6930000e-02
  -7.4110000e-02
  -7.8700000e-03
  -1.9080000e-02
  -1.4652000e-01
  -7.3780000e-02
  -8.8920000e-02
  -6.7010000e-02
  -1.0700000e-03
  -1.0918000e-01
  -5.2070000e-02
   3.7430000e-02
  -4.1100000e-02
  -1.8900000e-03
   6.8820000e-02
  -6.1700000e-03
  -2.7560000e-02
  -5.4120000e-02
  -4.8000000e-03
  -1.0054000e-01
   5.8070000e-02
   4.0960000e-02
   2.0210000e-02
   4.0520000e-02
   1.4660000e-01
   4.5950000e-02
   3.8330000e-02
   1.4611000e-01
   6.9450000e-02
   1.1368000e-01
   1.5192000e-01
   1.0084000e-01
   6.5910000e-02
   4.0410000e-02
   1.7885000e-01
   1.1203000e-01
   3.3370000e-02
   6.5060000e-02
   1.9740000e-02
   1.2031000e-01
   5.7280000e-02
  -4.7380000e-02
  -4.4720000e-02
  -9.9450000e-02
  -2.0670000e-02
  -1.6256000e-01
  -1.1285000e-01
  -1.6590000e-02
  -1.7419000e-01
  -1.7964000e-01
  -2.0306000e-01
  -1.7251000e-01
  -2.6664000e-01
  -2.1523000e-01
  -1.9889000e-01
  -2.1161000e-01
  -1.4660000e-01
  -1.8277000e-01
   1.2860000e-02
  -2.2430000e-02
  -1.0657000e-01
  -5.2750000e-02
  -1.7172000e-01
  -2.9280000e-02
  -8.9790000e-02
   2.6300000e-03
   6.1640000e-02
  -6.2000000e-03
   1.0430000e-01
   8.1980000e-02
   7.5400000e-02
   1.2163000e-01
   1.1261000e-01
   1.4989000e-01
   7.9900000e-02
   1.7616000e-01
   1.3221000e-01
   1.6651000e-01
   1.8441000e-01
   5.4810000e-02
   1.2242000e-01
   8.8040000e-02
   1.3037000e-01
  -2.7940000e-02
   1.6769000e-01
   2.6171000e-01
   1.4545000e-01
   2.1244000e-01
   8.2800000e-02
   8.2280000e-02
   2.6620000e-02
   1.0424000e-01
   1.7580000e-02
  -9.1000000e-02
  -1.6730000e-02
  -1.2090000e-02
  -1.4079000e-01
  -6.6130000e-02
   6.7120000e-02
  -1.4449000e-01
  -1.7572000e-01
  -2.0975000e-01
  -1.8609000e-01
  -2.1871000e-01
  -1.1315000e-01
  -1.5804000e-01
  -2.7451000e-01
  -1.0090000e-01
  -1.1976000e-01
  -7.2930000e-02
  -9.6100000e-02
  -5.5880000e-02
   6.1030000e-02
  -3.6470000e-02
   1.5510000e-01
   4.2200000e-02
   2.3278000e-01
   3.6417000e-01
   3.9035000e-01
   3.7675000e-01
   4.0979000e-01
   4.9569000e-01
   3.2068000e-01
   4.6268000e-01
   3.3541000e-01
   2.7023000e-01
   3.1827000e-01
   1.9582000e-01
   1.8389000e-01
   1.0389000e-01
   1.3046000e-01
   9.3360000e-02
  -2.1850000e-02
   3.6330000e-02
  -1.2398000e-01
  -4.1870000e-02
  -1.9598000e-01
  -1.7183000e-01
  -8.3320000e-02
  -2.3777000e-01
  -2.6143000e-01
  -2.1932000e-01
  -1.6920000e-01
  -3.2501000e-01
  -3.1945000e-01
  -2.2327000e-01
  -2.5578000e-01
  -3.8385000e-01
  -2.2412000e-01
  -2.6023000e-01
  -2.3130000e-01
  -1.8332000e-01
  -5.4340000e-02
  -1.0700000e-03
  -2.4650000e-02
   1.8559000e-01
   8.6970000e-02
   1.4010000e-02
   2.5386000e-01
   2.1266000e-01
   1.7188000e-01
   2.9066000e-01
   3.5002000e-01
   3.3543000e-01
   3.1679000e-01
   3.4284000e-01
   2.7731000e-01
   2.4155000e-01
   3.4429000e-01
   2.2346000e-01
   2.4635000e-01
   2.5806000e-01
   1.4606000e-01
   2.0394000e-01
   1.5752000e-01
  -3.4110000e-02
  -7.0220000e-02
  -8.6280000e-02
  -6.4490000e-02
  -2.0591000e-01
  -2.1575000e-01
  -1.8932000e-01
  -3.5120000e-01
  -2.2296000e-01
  -2.5543000e-01
  -3.0497000e-01
  -3.0108000e-01
  -3.0799000e-01
  -2.2069000e-01
  -2.4997000e-01
  -2.2793000e-01
  -2.2083000e-01
  -1.7515000e-01
  -1.5930000e-01
  -1.8935000e-01
  -8.1460000e-02
  -2.9360000e-02
   6.1750000e-02
   1.4318000e-01
   1.1499000e-01
   1.3926000e-01
   1.9527000e-01
   2.4737000e-01
   2.0114000e-01
   2.0306000e-01
   2.9924000e-01
   3.8215000e-01
   3.9948000e-01
   2.8825000e-01
   3.6014000e-01
   3.9562000e-01
   3.3949000e-01
   2.5806000e-01
   1.5977000e-01
   1.5401000e-01
   5.3270000e-02
   6.5040000e-02
   5.6370000e-02
  -5.4730000e-02
   6.1940000e-02
  -2.5200000e-03
  -1.9300000e-01
  -1.1655000e-01
  -1.4181000e-01
  -1.5584000e-01
  -2.6746000e-01
  -1.7216000e-01
  -3.1939000e-01
  -2.6944000e-01
  -2.6971000e-01
  -3.0311000e-01
  -1.4965000e-01
  -2.6297000e-01
  -1.9503000e-01
  -1.5609000e-01
  -1.2648000e-01
  -1.1460000e-02
  -5.4480000e-02
   2.2370000e-02
  -6.9400000e-03
   1.1694000e-01
   3.9290000e-02
   2.5000000e-03
   2.7670000e-01
   9.4590000e-02
   8.5380000e-02
   3.0590000e-01
   2.6195000e-01
   1.3901000e-01
   6.5560000e-02
   1.9143000e-01
   1.5080000e-01
   1.1329000e-01
   1.7490000e-01
   1.2335000e-01
   1.2988000e-01
   1.7062000e-01
   1.2083000e-01
   1.1184000e-01
   1.4894000e-01
   1.1411000e-01
  -3.1720000e-02
  -1.0360000e-02
   5.3680000e-02
  -1.6432000e-01
  -7.9130000e-02
  -1.1708000e-01
  -1.6240000e-01
  -1.8096000e-01
  -8.9550000e-02
  -2.3388000e-01
  -2.9573000e-01
  -1.0205000e-01
  -6.7970000e-02
  -1.7109000e-01
  -1.9550000e-02
   2.1410000e-02
  -1.3402000e-01
   4.4340000e-02
  -2.3800000e-02
  -6.5640000e-02
  -1.0046000e-01
  -1.1845000e-01
  -1.3120000e-01
  -1.7696000e-01
  -3.6160000e-02
  -1.4570000e-01
  -5.1050000e-02
  -9.5800000e-02
  -5.8700000e-02
  -9.1110000e-02
  -3.4300000e-03
   6.9370000e-02
  -3.7010000e-02
   1.0874000e-01
   1.2437000e-01
   1.5977000e-01
   2.2115000e-01
   2.0794000e-01
   1.5472000e-01
   3.1567000e-01
   1.5952000e-01
   1.2788000e-01
   9.3550000e-02
   7.8720000e-02
   5.5630000e-02
  -5.6800000e-03
  -3.1800000e-03
  -2.9780000e-02
   1.8340000e-02
  -7.7130000e-02
  -1.4726000e-01
   1.2382000e-01
   1.7550000e-02
  -3.6710000e-02
  -2.4870000e-02
  -1.0051000e-01
  -1.1738000e-01
  -1.1869000e-01
  -5.9250000e-02
  -2.4926000e-01
  -3.2732000e-01
  -2.6519000e-01
  -2.8770000e-01
  -3.1177000e-01
  -3.4429000e-01
  -1.5683000e-01
  -1.9662000e-01
  -1.5546000e-01
  -1.1502000e-01
  -4.4090000e-02
  -4.5380000e-02
  -2.0890000e-02
  -3.9650000e-02
   5.8760000e-02
   3.8170000e-02
  -1.7380000e-02
   1.1710000e-01
   7.9050000e-02
   7.3750000e-02
   1.8332000e-01
   1.6931000e-01
   1.4046000e-01
   1.3780000e-01
   2.3928000e-01
   1.7942000e-01
   2.4811000e-01
   2.0884000e-01
   1.5050000e-01
   2.0819000e-01
   1.4608000e-01
   1.0030000e-01
   2.5200000e-02
  -2.1300000e-02
  -1.1151000e-01
   6.8800000e-03
  -1.1269000e-01
  -1.6536000e-01
  -2.0865000e-01
  -7.6250000e-02
  -1.8521000e-01
  -2.4101000e-01
  -1.5593000e-01
  -1.3402000e-01
  -4.5160000e-02
  -7.3430000e-02
  -7.5130000e-02
  -6.5360000e-02
  -1.4762000e-01
  -1.2091000e-01
  -1.1886000e-01
  -1.8968000e-01
  -1.7904000e-01
  -2.1345000e-01
  -1.5096000e-01
  -1.2834000e-01
  -1.0038000e-01
  -8.5110000e-02
  -4.0390000e-02
  -4.7460000e-02
   7.5950000e-02
   1.4436000e-01
   6.2240000e-02
   2.0300000e-01
   1.0948000e-01
   2.1383000e-01
   2.2121000e-01
   1.9837000e-01
   1.5905000e-01
   1.4076000e-01
   2.2475000e-01
   6.1720000e-02
   1.6476000e-01
   1.2719000e-01
   4.9270000e-02
   8.0200000e-02
   9.2920000e-02
   5.1130000e-02
   1.4140000e-01
   8.3520000e-02
   5.6070000e-02
  -1.0041000e-01
   6.4350000e-02
  -3.3530000e-02
  -1.6031000e-01
  -2.9910000e-02
  -1.8225000e-01
  -1.7177000e-01
  -2.3001000e-01
  -2.5715000e-01
  -2.3371000e-01
  -2.3303000e-01
  -2.0155000e-01
  -1.9936000e-01
  -1.8398000e-01
  -1.1724000e-01
  -9.9500000e-02
  -2.0196000e-01
  -1.4625000e-01
  -8.8600000e-03
  -1.4619000e-01
  -1.1957000e-01
  -6.1400000e-03
   8.2890000e-02
  -1.6434000e-01
   3.0130000e-02
   1.0860000e-01
   1.1930000e-02
   7.8940000e-02
   1.1587000e-01
   1.8842000e-01
   1.6887000e-01
   2.5705000e-01
   1.9116000e-01
   1.5502000e-01
   2.8183000e-01
   2.4808000e-01
   2.6453000e-01
   2.1855000e-01
   1.3301000e-01
   1.6402000e-01
   2.2535000e-01
   1.6009000e-01
   5.4260000e-02
   1.0117000e-01
   1.0723000e-01
   1.0800000e-01
   6.2320000e-02
   9.7720000e-02
   3.0270000e-02
   1.0405000e-01
   3.0820000e-02
   2.5010000e-02
   5.4970000e-02
   4.9400000e-03
  -1.1812000e-01
  -1.8047000e-01
  -2.0347000e-01
  -2.7533000e-01
  -1.8823000e-01
  -2.6434000e-01
  -1.6640000e-01
  -1.5146000e-01
  -7.0490000e-02
  -1.7731000e-01
  -7.0270000e-02
  -8.1160000e-02
  -7.9430000e-02
  -2.0260000e-02
  -1.8560000e-02
  -5.5660000e-02
   4.6860000e-02
   1.9820000e-02
   2.1666000e-01
   2.5296000e-01
   2.8531000e-01
   1.8378000e-01
   1.5371000e-01
   3.7324000e-01
   3.4423000e-01
   4.5448000e-01
   3.6699000e-01
   4.0003000e-01
   4.2630000e-01
   2.9028000e-01
   3.1704000e-01
   2.6560000e-01
   1.3937000e-01
   1.3591000e-01
   2.9010000e-02
  -2.0780000e-02
  -1.1266000e-01
  -2.3050000e-01
  -1.0471000e-01
  -1.6922000e-01
  -1.4403000e-01
  -2.5280000e-01
  -2.4016000e-01
  -2.1463000e-01
  -1.3720000e-01
  -1.7790000e-02
  -1.2580000e-02
  -1.2322000e-01
  -8.2500000e-03
  -1.3399000e-01
  -1.1856000e-01
  -1.8840000e-02
  -9.1140000e-02
   1.6230000e-02
  -6.9260000e-02
  -8.7270000e-02
  -1.2478000e-01
   2.8200000e-03
   3.7700000e-02
  -3.6770000e-02
   7.5180000e-02
   8.8970000e-02
   5.9310000e-02
   8.3490000e-02
   1.9889000e-01
   1.4521000e-01
   1.3142000e-01
   1.8683000e-01
   2.2497000e-01
   1.6508000e-01
   2.2110000e-01
   2.8764000e-01
   1.7205000e-01
   1.6865000e-01
   1.7838000e-01
   1.3057000e-01
   1.1033000e-01
   1.5398000e-01
   1.1587000e-01
  -6.4160000e-02
   8.7790000e-02
   1.7421000e-01
   7.9920000e-02
  -6.1500000e-02
   6.0210000e-02
   4.6100000e-03
  -2.0660000e-01
  -1.6881000e-01
  -2.3166000e-01
  -2.9230000e-01
  -3.3913000e-01
  -1.8847000e-01
  -2.4838000e-01
  -3.4552000e-01
  -1.3619000e-01
  -1.9947000e-01
  -1.9376000e-01
  -1.4041000e-01
  -1.4622000e-01
  -2.6380000e-02
  -1.5541000e-01
   6.1420000e-02
   1.9960000e-02
   1.1173000e-01
   1.4134000e-01
   2.3198000e-01
   1.9352000e-01
   1.7671000e-01
   3.3088000e-01
   3.0612000e-01
   2.5949000e-01
   2.0671000e-01
   2.5450000e-01
   1.6388000e-01
   2.2527000e-01
   1.4008000e-01
   2.1238000e-01
   1.5118000e-01
   1.5754000e-01
   1.6909000e-01
   4.1290000e-02
  -3.6500000e-03
   4.0440000e-02
  -4.5020000e-02
  -1.0422000e-01
  -7.5560000e-02
  -8.2800000e-02
  -9.6210000e-02
  -1.4447000e-01
  -4.1570000e-02
  -1.3070000e-01
  -6.9720000e-02
  -1.0542000e-01
  -4.4860000e-02
  -5.8400000e-03
  -6.3660000e-02
  -2.0450000e-02
  -9.2370000e-02
  -9.5030000e-02
  -9.1380000e-02
  -1.4979000e-01
  -2.3097000e-01
  -2.5153000e-01
  -1.8581000e-01
  -1.4523000e-01
  -4.2310000e-02
  -5.5470000e-02
  -5.4810000e-02
  -2.2400000e-02
   9.2510000e-02
   1.3490000e-01
   3.6200000e-03
   2.7910000e-02
   7.0050000e-02
   1.9354000e-01
   1.1943000e-01
   1.7740000e-01
   2.3580000e-01
   1.7517000e-01
   3.1325000e-01
   1.5574000e-01
   3.1843000e-01
   4.0801000e-01
   2.0942000e-01
   2.8888000e-01
   3.1424000e-01
   2.4265000e-01
   2.6426000e-01
   1.9947000e-01
   2.6270000e-02
  -7.0200000e-03
   3.4500000e-03
  -1.2286000e-01
  -1.4809000e-01
  -1.4883000e-01
  -1.5543000e-01
  -1.6489000e-01
  -3.4111000e-01
  -2.5762000e-01
  -2.8646000e-01
  -3.8915000e-01
  -2.9450000e-01
  -2.6999000e-01
  -2.6919000e-01
  -1.5214000e-01
  -1.2338000e-01
  -1.4529000e-01
  -1.7929000e-01
   9.1600000e-02
  -7.4630000e-02
  -6.7010000e-02
   1.6481000e-01
   1.0603000e-01
   1.8831000e-01
   1.4811000e-01
   7.0410000e-02
   2.3667000e-01
   1.7131000e-01
   1.7419000e-01
   1.0227000e-01
   2.5981000e-01
   1.4526000e-01
   2.0188000e-01
   2.8540000e-01
   1.9524000e-01
   2.0369000e-01
   1.9571000e-01
   2.0440000e-01
   4.8500000e-02
   8.1540000e-02
   1.1008000e-01
  -6.6790000e-02
  -6.3360000e-02
  -7.8800000e-02
  -4.7080000e-02
   8.9100000e-03
  -1.4151000e-01
   5.2150000e-02
  -8.0720000e-02
   2.7580000e-02
   2.3470000e-02
  -1.0819000e-01
   2.0510000e-02
  -7.6410000e-02
  -1.8891000e-01
  -1.8899000e-01
  -1.9028000e-01
  -2.4224000e-01
  -3.4108000e-01
  -2.9315000e-01
  -3.3162000e-01
  -3.2274000e-01
  -2.4240000e-01
  -3.8106000e-01
  -6.7340000e-02
  -1.6015000e-01
  -1.7142000e-01
  -1.1694000e-01
   8.0300000e-03
   1.1351000e-01
   2.8930000e-02
   9.3110000e-02
   3.6891000e-01
   3.4695000e-01
   3.5910000e-01
   3.8018000e-01
   3.5871000e-01
   2.8718000e-01
   3.4879000e-01
   2.9294000e-01
   2.4482000e-01
   3.6280000e-01
   2.7775000e-01
   1.7347000e-01
   1.6423000e-01
   1.3534000e-01
   1.9886000e-01
   5.2400000e-02
   5.0500000e-02
  -6.9900000e-03
  -1.6906000e-01
  -1.6720000e-01
  -2.1463000e-01
  -1.8118000e-01
  -3.9880000e-01
  -2.8468000e-01
  -2.7618000e-01
  -3.0771000e-01
  -1.4586000e-01
  -3.0503000e-01
  -2.7605000e-01
  -1.2881000e-01
  -4.6010000e-02
  -5.1710000e-02
  -7.2400000e-03
  -7.4060000e-02
  -3.1260000e-02
   5.2730000e-02
  -4.1700000e-02
  -6.3100000e-03
   1.3243000e-01
   8.3380000e-02
   4.4610000e-02
   2.2828000e-01
   2.1836000e-01
   1.1351000e-01
   2.4731000e-01
   2.3602000e-01
   2.0566000e-01
   2.9732000e-01
   1.0797000e-01
   1.5176000e-01
   2.0322000e-01
   1.7967000e-01
   1.5445000e-01
   1.4405000e-01
   1.5308000e-01
   5.2340000e-02
   1.1280000e-01
   9.6510000e-02
  -4.4580000e-02
   8.0550000e-02
  -8.2200000e-02
   2.5030000e-02
  -3.0050000e-02
  -1.5190000e-02
  -1.9660000e-02
  -1.0553000e-01
  -5.5700000e-03
  -5.9520000e-02
   2.2870000e-02
  -9.2150000e-02
  -1.7509000e-01
  -7.9460000e-02
  -7.4330000e-02
  -8.3820000e-02
  -1.6747000e-01
  -2.8050000e-02
  -4.6830000e-02
  -5.4100000e-02
   3.9100000e-02
  -9.6210000e-02
  -1.2340000e-02
   2.0510000e-02
  -4.5900000e-02
  -3.1370000e-02
  -1.0334000e-01
   2.6730000e-02
  -9.6700000e-02
  -8.3210000e-02
   2.4480000e-02
  -1.1019000e-01
   6.4930000e-02
   2.4180000e-02
   2.0322000e-01
   1.1666000e-01
   1.3416000e-01
   2.8975000e-01
   1.1820000e-01
   3.1468000e-01
   1.4364000e-01
   2.8520000e-01
   3.3195000e-01
   2.7627000e-01
   3.3390000e-01
   1.9919000e-01
   1.5752000e-01
   1.8154000e-01
   1.4554000e-01
   4.9110000e-02
  -7.4770000e-02
   6.5390000e-02
  -2.2950000e-02
  -2.0004000e-01
   7.9380000e-02
  -3.1260000e-02
  -8.2060000e-02
  -1.1570000e-01
  -1.2483000e-01
  -1.8285000e-01
  -2.4994000e-01
  -2.9867000e-01
  -3.5276000e-01
  -2.9192000e-01
  -2.9516000e-01
  -4.2643000e-01
  -3.1218000e-01
  -1.9566000e-01
  -2.8095000e-01
  -2.2628000e-01
  -2.0728000e-01
  -7.0570000e-02
  -7.5700000e-02
  -5.5000000e-02
   5.8480000e-02
   1.2906000e-01
   2.9140000e-01
   1.6426000e-01
   2.4665000e-01
   1.9333000e-01
   4.2101000e-01
   3.2578000e-01
   3.2869000e-01
   4.8116000e-01
   3.6579000e-01
   3.7423000e-01
   3.2055000e-01
   2.5957000e-01
   2.5628000e-01
   2.4150000e-01
   1.8776000e-01
   1.5606000e-01
   1.8510000e-02
  -9.4100000e-02
  -4.7540000e-02
  -8.9410000e-02
  -1.8154000e-01
  -2.0865000e-01
  -1.6857000e-01
  -1.9313000e-01
  -3.1920000e-01
  -2.4772000e-01
  -2.9483000e-01
  -3.8273000e-01
  -3.9178000e-01
  -2.9277000e-01
  -4.2528000e-01
  -3.4868000e-01
  -2.5970000e-01
  -2.6905000e-01
  -2.6968000e-01
   5.0000000e-05
   6.3120000e-02
  -1.1760000e-02
   1.0756000e-01
   1.0257000e-01
   3.0490000e-02
   1.1845000e-01
   2.6760000e-01
   1.0073000e-01
   2.1252000e-01
   1.9223000e-01
   2.9993000e-01
   3.2123000e-01
   1.7975000e-01
   4.5298000e-01
   3.5797000e-01
   3.0207000e-01
   1.8326000e-01
   2.2793000e-01
   2.3665000e-01
   1.6922000e-01
   1.3838000e-01
   1.2390000e-02
   1.5053000e-01
   3.0740000e-02
  -1.2420000e-02
  -5.6230000e-02
  -9.7910000e-02
  -1.1546000e-01
  -9.9530000e-02
  -2.5271000e-01
  -2.9883000e-01
   2.3580000e-02
  -1.7358000e-01
  -2.6966000e-01
  -4.9240000e-02
  -1.4279000e-01
  -1.0764000e-01
  -5.3080000e-02
  -5.0070000e-02
  -7.6610000e-02
   5.4300000e-03
  -3.3200000e-03
  -1.6591000e-01
  -4.0610000e-02
  -9.1000000e-03
  -5.4620000e-02
  -2.0560000e-02
  -3.8700000e-03
   1.3410000e-02
  -2.3600000e-03
   1.6506000e-01
  -4.6090000e-02
   2.5610000e-02
   2.7970000e-02
   8.4200000e-02
   4.3540000e-02
   9.9280000e-02
   2.2041000e-01
   4.2690000e-02
   1.8274000e-01
   1.9357000e-01
   6.3090000e-02
   1.6840000e-01
   1.3057000e-01
   7.4520000e-02
   2.4224000e-01
   1.5626000e-01
   2.2373000e-01
   2.2000000e-01
   2.1353000e-01
   1.2884000e-01
   1.9445000e-01
   7.7590000e-02
  -1.9330000e-02
   7.2710000e-02
  -4.8280000e-02
  -7.4300000e-03
  -2.1990000e-02
  -1.6127000e-01
  -7.1810000e-02
  -7.5760000e-02
  -2.2924000e-01
  -2.9145000e-01
  -2.0649000e-01
  -2.8296000e-01
  -2.9675000e-01
  -2.7772000e-01
  -3.3080000e-01
  -1.9974000e-01
  -2.9343000e-01
  -2.7385000e-01
  -2.5315000e-01
  -1.6034000e-01
  -1.5244000e-01
  -1.9812000e-01
  -2.6900000e-03
  -3.3200000e-03
   2.6069000e-01
   1.6122000e-01
   1.1540000e-01
   2.7410000e-01
   2.7237000e-01
   4.4927000e-01
   2.6299000e-01
   3.6074000e-01
   4.9010000e-01
   4.3710000e-01
   4.6945000e-01
   4.3595000e-01
   4.0768000e-01
   3.4843000e-01
   3.1265000e-01
   2.2137000e-01
   1.4710000e-01
   1.1091000e-01
  -8.1400000e-03
  -1.0156000e-01
  -1.1941000e-01
  -1.3857000e-01
  -1.1170000e-01
  -2.7078000e-01
  -3.8654000e-01
  -2.0287000e-01
  -2.3440000e-01
  -2.5573000e-01
  -3.1451000e-01
  -2.4435000e-01
  -2.1734000e-01
  -1.4104000e-01
  -2.8240000e-02
  -8.8420000e-02
  -5.2670000e-02
  -7.5350000e-02
  -1.2058000e-01
  -1.1400000e-01
  -4.5400000e-02
   3.2900000e-03
  -4.3540000e-02
  -8.3460000e-02
   5.9440000e-02
   2.2590000e-02
   1.5883000e-01
   2.5269000e-01
   2.3401000e-01
   1.2294000e-01
   1.7984000e-01
   2.6217000e-01
   2.6927000e-01
   1.3520000e-01
   1.9903000e-01
   1.7112000e-01
   1.2193000e-01
   1.6467000e-01
   2.0092000e-01
   7.5950000e-02
   1.2596000e-01
   1.0550000e-01
   2.3800000e-02
   2.1605000e-01
   9.0860000e-02
   1.2612000e-01
   4.7130000e-02
  -1.3870000e-02
  -7.7430000e-02
  -6.8980000e-02
  -4.7020000e-02
  -1.3682000e-01
  -7.2850000e-02
  -9.2450000e-02
  -1.4688000e-01
  -1.0005000e-01
  -2.3747000e-01
  -3.8110000e-02
  -2.2834000e-01
  -2.5633000e-01
  -1.4778000e-01
  -2.7070000e-01
  -1.8729000e-01
  -1.2056000e-01
  -2.2370000e-02
  -1.6341000e-01
  -4.2090000e-02
  -1.7468000e-01
  -1.6270000e-01
  -6.8500000e-03
  -8.1490000e-02
  -9.7860000e-02
  -8.1130000e-02
   6.2460000e-02
   1.0301000e-01
   8.0990000e-02
   1.7441000e-01
   1.2895000e-01
   2.0533000e-01
   2.0964000e-01
   3.0791000e-01
   1.9966000e-01
   1.3808000e-01
   2.6557000e-01
   1.3764000e-01
   1.7416000e-01
   8.8590000e-02
   6.6540000e-02
   7.0520000e-02
   5.9470000e-02
   6.6110000e-02
   9.6730000e-02
   8.3400000e-03
  -6.8870000e-02
  -7.6200000e-02
  -1.3712000e-01
  -9.8270000e-02
  -6.9120000e-02
  -1.9530000e-01
  -1.5628000e-01
  -1.3117000e-01
  -2.0215000e-01
  -9.3330000e-02
  -1.3386000e-01
  -1.3103000e-01
  -1.6344000e-01
  -9.5220000e-02
  -1.8461000e-01
  -1.3476000e-01
  -1.3580000e-01
  -2.5869000e-01
  -1.6358000e-01
  -1.2500000e-01
  -1.9028000e-01
  -1.8384000e-01
  -3.7370000e-02
   2.2240000e-02
  -5.4600000e-03
   9.4620000e-02
  -2.1030000e-02
   8.5630000e-02
   1.8982000e-01
   2.5274000e-01
   2.2658000e-01
   3.5394000e-01
   3.1920000e-01
   3.3069000e-01
   4.0135000e-01
   4.1133000e-01
   3.3582000e-01
   3.3228000e-01
   2.6574000e-01
   2.1581000e-01
   2.2085000e-01
   1.6558000e-01
   8.1290000e-02
   2.1410000e-02
   4.5240000e-02
  -1.0986000e-01
  -1.1315000e-01
  -6.9720000e-02
  -2.4092000e-01
  -1.1110000e-01
  -2.1732000e-01
  -2.8468000e-01
  -2.8405000e-01
  -2.6834000e-01
  -3.5899000e-01
  -2.6757000e-01
  -2.7797000e-01
  -2.4912000e-01
  -2.8353000e-01
  -2.3549000e-01
  -1.4038000e-01
  -2.4717000e-01
  -2.0904000e-01
  -2.6031000e-01
  -1.3863000e-01
  -6.3940000e-02
   3.5450000e-02
   1.0328000e-01
   1.6092000e-01
   9.7330000e-02
   9.7010000e-02
   1.0169000e-01
   2.2310000e-01
   2.2335000e-01
   2.3549000e-01
   3.5142000e-01
   1.4049000e-01
   2.8888000e-01
   2.2634000e-01
   2.5123000e-01
   2.7418000e-01
   2.9886000e-01
   3.0763000e-01
   5.4450000e-02
  -2.7390000e-02
   1.1798000e-01
   2.6785000e-01
   1.1743000e-01
   1.1993000e-01
   2.8980000e-02
  -1.7166000e-01
  -5.4230000e-02
   4.5900000e-02
  -2.1658000e-01
  -1.3850000e-02
  -6.7090000e-02
  -2.9738000e-01
  -2.6072000e-01
  -1.4756000e-01
  -2.5181000e-01
  -2.8073000e-01
  -1.8041000e-01
  -3.1717000e-01
  -3.4232000e-01
  -1.5743000e-01
  -5.1490000e-02
  -6.0680000e-02
  -2.2000000e-04
  -2.5310000e-02
  -1.5552000e-01
  -1.2985000e-01
  -9.1660000e-02
   2.0510000e-02
   1.2508000e-01
   2.1082000e-01
   1.0605000e-01
   1.6423000e-01
   1.5321000e-01
   2.1575000e-01
   3.0930000e-01
   2.3892000e-01
   2.5197000e-01
   3.2891000e-01
   3.3357000e-01
   3.1964000e-01
   3.0530000e-01
   3.7774000e-01
   3.2737000e-01
   2.8767000e-01
   1.8019000e-01
  -1.8670000e-02
   7.8690000e-02
  -4.2720000e-02
  -6.0590000e-02
  -4.2940000e-02
  -2.1353000e-01
  -3.4388000e-01
  -2.8115000e-01
  -2.2250000e-01
  -2.5609000e-01
  -1.6988000e-01
  -2.8893000e-01
  -2.8282000e-01
  -1.8982000e-01
  -4.2360000e-02
  -1.7644000e-01
  -4.3920000e-02
  -1.0668000e-01
  -1.2640000e-01
  -1.8219000e-01
  -9.4840000e-02
  -8.0310000e-02
  -7.6630000e-02
  -1.0981000e-01
   1.8560000e-02
  -2.5500000e-02
   5.3050000e-02
   9.1710000e-02
  -1.8040000e-02
   1.1916000e-01
   8.6010000e-02
   8.8890000e-02
   1.4427000e-01
   1.3583000e-01
   1.9182000e-01
   1.2996000e-01
   3.4459000e-01
   2.3955000e-01
   1.6986000e-01
   1.4175000e-01
   1.8749000e-01
   3.6266000e-01
   2.0281000e-01
   2.7207000e-01
   2.1775000e-01
   1.8299000e-01
   1.8082000e-01
  -2.7100000e-03
   1.4285000e-01
   5.5630000e-02
   2.7830000e-02
  -9.5610000e-02
  -6.2650000e-02
   5.8000000e-04
  -1.0756000e-01
  -2.0920000e-02
  -1.5288000e-01
  -8.3980000e-02
  -8.1870000e-02
  -1.6997000e-01
  -1.9069000e-01
  -2.3294000e-01
  -2.1775000e-01
  -2.4967000e-01
  -1.6703000e-01
  -2.7835000e-01
  -2.8433000e-01
  -1.6925000e-01
  -2.0002000e-01
  -1.4699000e-01
  -1.2157000e-01
  -9.1410000e-02
  -5.9110000e-02
  -6.3610000e-02
   2.6050000e-02
   3.4410000e-02
   1.5683000e-01
   1.6991000e-01
   8.3350000e-02
   9.1660000e-02
   1.4515000e-01
   2.4961000e-01
   1.6495000e-01
   2.2562000e-01
   2.4284000e-01
   1.9409000e-01
   1.4855000e-01
   2.1068000e-01
   8.3950000e-02
   1.5261000e-01
   1.3961000e-01
   1.0715000e-01
   8.9790000e-02
   7.1000000e-04
   3.3590000e-02
  -8.3190000e-02
   4.1680000e-02
  -1.1491000e-01
  -1.5373000e-01
  -1.5697000e-01
  -1.2489000e-01
  -1.2445000e-01
  -1.7523000e-01
  -1.8282000e-01
  -1.3745000e-01
  -1.2300000e-01
  -9.6180000e-02
  -1.9280000e-01
  -1.1946000e-01
  -1.1302000e-01
  -3.2060000e-01
  -1.7751000e-01
  -1.8880000e-01
  -1.2034000e-01
  -1.6349000e-01
  -9.9230000e-02
  -6.2810000e-02
  -7.2270000e-02
   3.2490000e-02
   2.2150000e-02
   2.1660000e-02
   3.8060000e-02
   2.2000000e-01
   1.7219000e-01
   1.5417000e-01
   3.0730000e-01
   2.3626000e-01
   2.0813000e-01
   3.0330000e-01
   2.3626000e-01
   1.6018000e-01
   1.5083000e-01
   2.6870000e-02
   6.2430000e-02
   9.2840000e-02
   8.4910000e-02
   5.4510000e-02
   1.3224000e-01
   1.0970000e-01
   2.9100000e-03
   5.5000000e-02
  -2.9560000e-02
  -1.3712000e-01
  -3.1450000e-02
  -1.3109000e-01
  -1.0466000e-01
  -1.9626000e-01
  -1.1960000e-01
  -5.8650000e-02
  -2.1304000e-01
  -1.2228000e-01
  -1.4518000e-01
  -7.5130000e-02
  -1.9560000e-01
  -1.6404000e-01
  -2.0355000e-01
  -3.2745000e-01
  -1.3630000e-01
  -1.5176000e-01
  -1.5255000e-01
  -1.6846000e-01
  -8.4310000e-02
  -1.7470000e-02
  -8.7030000e-02
  -4.7200000e-03
   8.7350000e-02
   4.9300000e-02
   1.8614000e-01
   2.1238000e-01
   3.4640000e-01
   3.3683000e-01
   4.6260000e-01
   4.9317000e-01
   3.7917000e-01
   4.0675000e-01
   3.7571000e-01
   3.6203000e-01
   2.8381000e-01
   1.9439000e-01
   2.9464000e-01
   1.5042000e-01
   2.2384000e-01
   6.0730000e-02
   6.3360000e-02
   6.0680000e-02
  -5.7300000e-02
  -3.6000000e-04
  -6.3360000e-02
  -1.5889000e-01
  -1.7117000e-01
  -2.8490000e-01
  -2.3492000e-01
  -3.8059000e-01
  -2.7659000e-01
  -2.9063000e-01
  -3.7862000e-01
  -2.8797000e-01
  -3.2995000e-01
  -3.0799000e-01
  -2.5691000e-01
  -2.6829000e-01
  -2.2933000e-01
  -2.4778000e-01
  -2.2302000e-01
  -2.2911000e-01
  -1.3339000e-01
  -1.5159000e-01
  -3.0520000e-02
   1.1516000e-01
   1.1650000e-02
   6.9150000e-02
   1.6081000e-01
   1.9694000e-01
   3.6173000e-01
   4.0072000e-01
   4.4908000e-01
   3.1059000e-01
   4.5415000e-01
   3.2932000e-01
   3.1542000e-01
   2.5918000e-01
   3.0333000e-01
   4.5424000e-01
   1.9848000e-01
   2.6450000e-01
   2.4465000e-01
   1.8458000e-01
   8.1100000e-02
   2.4950000e-02
   1.4586000e-01
  -1.1823000e-01
  -8.0200000e-02
  -6.3100000e-03
  -1.7169000e-01
  -1.3588000e-01
  -1.7301000e-01
  -8.3430000e-02
  -2.5669000e-01
  -3.6184000e-01
  -2.2401000e-01
  -3.2192000e-01
  -3.3765000e-01
  -4.8231000e-01
  -2.3506000e-01
  -2.6157000e-01
  -3.3406000e-01
  -2.0665000e-01
  -2.0012000e-01
  -1.8897000e-01
  -1.6901000e-01
  -1.4830000e-01
  -1.2854000e-01
  -4.0170000e-02
   6.8820000e-02
   1.3460000e-02
   1.2272000e-01
   2.2203000e-01
   2.3736000e-01
   3.5441000e-01
   4.5114000e-01
   3.4522000e-01
   4.3836000e-01
   4.6671000e-01
   4.5174000e-01
   4.6597000e-01
   4.6142000e-01
   3.4210000e-01
   2.8696000e-01
   2.9433000e-01
   1.9138000e-01
   1.9198000e-01
   1.2599000e-01
   1.5600000e-02
   4.3870000e-02
  -7.1730000e-02
  -1.4501000e-01
  -1.6769000e-01
  -2.4229000e-01
  -2.4122000e-01
  -3.1684000e-01
  -2.8932000e-01
  -2.9551000e-01
  -3.6924000e-01
  -3.0818000e-01
  -3.3360000e-01
  -3.0176000e-01
  -3.8967000e-01
  -3.0130000e-01
  -1.3358000e-01
  -2.1312000e-01
  -1.1702000e-01
  -1.3575000e-01
  -5.4230000e-02
  -7.8610000e-02
  -2.9450000e-02
   2.7800000e-02
   6.9560000e-02
   1.5716000e-01
   1.0293000e-01
   2.5696000e-01
   2.2488000e-01
   3.8753000e-01
   3.6677000e-01
   3.8597000e-01
   3.8402000e-01
   4.9054000e-01
   4.6959000e-01
   3.9386000e-01
   4.2468000e-01
   3.1251000e-01
   2.9839000e-01
   3.0379000e-01
   1.4869000e-01
   1.6892000e-01
   3.4190000e-02
   1.3572000e-01
  -9.4180000e-02
  -2.0800000e-03
  -1.7880000e-02
  -2.3626000e-01
  -1.2500000e-01
  -2.0150000e-01
  -2.3004000e-01
  -3.8662000e-01
  -2.8907000e-01
  -3.1638000e-01
  -4.2210000e-01
  -2.1981000e-01
  -4.0349000e-01
  -3.3796000e-01
  -2.0613000e-01
  -1.8581000e-01
  -3.2455000e-01
  -1.5442000e-01
   7.6800000e-03
  -2.1830000e-01
  -2.1375000e-01
  -2.4430000e-02
  -1.8730000e-02
  -1.3136000e-01
  -8.9490000e-02
   3.6710000e-02
  -7.1000000e-03
   1.9850000e-02
   3.8100000e-03
   1.6467000e-01
   1.3632000e-01
   1.2577000e-01
   3.8133000e-01
   3.1210000e-01
   2.2565000e-01
   3.2570000e-01
   3.1682000e-01
   3.1928000e-01
   1.9941000e-01
   2.7234000e-01
   1.8296000e-01
   1.3183000e-01
   9.8870000e-02
   6.5040000e-02
   4.9050000e-02
   1.4670000e-02
  -1.3092000e-01
  -1.5864000e-01
  -1.0986000e-01
  -2.3453000e-01
  -2.4997000e-01
  -1.5584000e-01
  -2.7563000e-01
  -3.4539000e-01
  -2.8657000e-01
  -3.1638000e-01
  -2.1970000e-01
  -2.9343000e-01
  -2.5957000e-01
  -3.0876000e-01
  -2.6766000e-01
  -2.9834000e-01
  -2.3360000e-01
  -1.2086000e-01
  -2.7103000e-01
  -2.1120000e-01
  -1.2053000e-01
  -1.4320000e-01
  -6.5010000e-02
  -1.0175000e-01
  -1.0500000e-02
  -3.0980000e-02
   6.5010000e-02
   1.2947000e-01
   1.8304000e-01
   3.4402000e-01
   3.5844000e-01
   4.1064000e-01
   4.7540000e-01
   4.3877000e-01
   5.3770000e-01
   5.1741000e-01
   4.7222000e-01
   3.9910000e-01
   3.0596000e-01
   3.2384000e-01
   1.2747000e-01
   1.2091000e-01
   6.5860000e-02
   1.6780000e-02
   2.0230000e-02
  -1.2525000e-01
  -9.1270000e-02
  -2.4547000e-01
  -1.3139000e-01
  -2.5806000e-01
  -2.2148000e-01
  -2.5524000e-01
  -2.3379000e-01
  -2.7133000e-01
  -2.4243000e-01
  -1.2818000e-01
  -1.4178000e-01
  -3.0451000e-01
  -1.5417000e-01
  -2.2420000e-01
  -1.4455000e-01
  -1.9590000e-01
  -1.3301000e-01
  -3.8360000e-02
  -1.2034000e-01
   8.5960000e-02
  -2.2810000e-02
   7.6690000e-02
   3.3700000e-02
   1.4255000e-01
   2.3092000e-01
   9.3410000e-02
   1.8946000e-01
   2.5661000e-01
   1.3684000e-01
   1.8998000e-01
   1.6903000e-01
   2.5883000e-01
   1.4057000e-01
   2.7659000e-01
   2.6198000e-01
   1.8269000e-01
   2.7928000e-01
   2.4558000e-01
   2.6511000e-01
   2.5195000e-01
   2.3336000e-01
   3.3291000e-01
   1.6374000e-01
   4.5020000e-02
   1.0603000e-01
  -2.9900000e-03
   3.2760000e-02
  -9.0210000e-02
   2.0320000e-02
  -9.8710000e-02
  -1.9991000e-01
  -1.0191000e-01
  -1.6651000e-01
  -1.6766000e-01
  -1.8392000e-01
  -1.5826000e-01
  -2.4364000e-01
  -2.8041000e-01
  -3.0407000e-01
  -2.1507000e-01
  -2.8293000e-01
  -2.3242000e-01
  -3.2666000e-01
  -2.1636000e-01
  -1.7772000e-01
  -1.7805000e-01
  -1.0803000e-01
  -9.5060000e-02
  -1.3641000e-01
   7.7040000e-02
   1.2720000e-02
   4.8610000e-02
   1.8532000e-01
   3.0848000e-01
   3.3889000e-01
   3.2496000e-01
   4.5056000e-01
   4.1955000e-01
   5.1371000e-01
   5.0066000e-01
   4.3354000e-01
   4.0864000e-01
   4.5755000e-01
   3.4582000e-01
   1.8998000e-01
   2.4334000e-01
   1.7293000e-01
   5.5740000e-02
   1.9330000e-02
  -5.2590000e-02
  -1.3931000e-01
  -2.2812000e-01
  -2.1011000e-01
  -2.0111000e-01
  -3.4901000e-01
  -3.1991000e-01
  -2.7709000e-01
  -3.8462000e-01
  -3.7582000e-01
  -2.6234000e-01
  -2.9143000e-01
  -3.5962000e-01
  -1.6347000e-01
  -2.0643000e-01
  -2.8805000e-01
  -5.9110000e-02
   1.1210000e-02
  -1.6459000e-01
  -3.8740000e-02
  -1.0487000e-01
  -1.4011000e-01
  -5.7720000e-02
  -5.1130000e-02
   9.2540000e-02
   1.0970000e-02
   7.1840000e-02
   1.4214000e-01
   1.6421000e-01
   3.1616000e-01
   2.2354000e-01
   3.2416000e-01
   3.1687000e-01
   3.4574000e-01
   3.8873000e-01
   2.7018000e-01
   3.9655000e-01
   1.8935000e-01
   2.9008000e-01
   1.8326000e-01
   9.5220000e-02
   1.3852000e-01
   1.1453000e-01
   4.6390000e-02
  -7.7700000e-02
  -1.9212000e-01
  -4.3210000e-02
  -1.8683000e-01
  -2.4065000e-01
  -2.4794000e-01
  -3.8621000e-01
  -2.7687000e-01
  -2.8416000e-01
  -2.6201000e-01
  -3.6461000e-01
  -2.8076000e-01
  -2.5894000e-01
  -2.9288000e-01
  -2.8153000e-01
  -2.6733000e-01
  -2.8433000e-01
  -2.5230000e-01
  -3.0001000e-01
  -1.8834000e-01
  -2.1375000e-01
  -1.8313000e-01
   6.5090000e-02
  -1.5410000e-02
  -1.8700000e-02
   2.7470000e-02
   2.5470000e-02
   1.4307000e-01
   1.7092000e-01
   2.0410000e-01
   2.6154000e-01
   2.9357000e-01
   3.1188000e-01
   3.0766000e-01
   3.9246000e-01
   3.6609000e-01
   2.1951000e-01
   2.9916000e-01
   2.0199000e-01
   1.3693000e-01
   2.2779000e-01
   7.6030000e-02
   8.8310000e-02
   1.9659000e-01
   3.8100000e-03
   1.1160000e-02
  -2.6760000e-02
   7.0850000e-02
  -6.5500000e-03
  -4.9960000e-02
  -7.4600000e-02
  -7.0570000e-02
  -7.2270000e-02
  -1.6698000e-01
  -2.8466000e-01
  -9.3250000e-02
  -2.0687000e-01
  -1.7139000e-01
  -1.4386000e-01
  -1.7679000e-01
  -7.9590000e-02
  -2.5866000e-01
  -1.9097000e-01
  -2.0873000e-01
  -1.6330000e-01
  -1.6053000e-01
  -2.2135000e-01
  -6.4620000e-02
  -5.5060000e-02
  -4.1430000e-02
  -2.0970000e-02
   8.0000000e-04
   4.5190000e-02
   8.9050000e-02
   1.3317000e-01
   2.1024000e-01
   2.3311000e-01
   3.2057000e-01
   3.8004000e-01
   3.4898000e-01
   5.5930000e-01
   4.3460000e-01
   4.4982000e-01
   5.5045000e-01
   4.6704000e-01
   3.0525000e-01
   3.0382000e-01
   3.3499000e-01
   1.9154000e-01
   1.6895000e-01
   6.5830000e-02
   2.8570000e-02
   2.2150000e-02
  -2.1610000e-02
  -1.3545000e-01
  -1.1464000e-01
  -1.2289000e-01
  -2.3832000e-01
  -2.4416000e-01
  -2.1896000e-01
  -4.0543000e-01
  -3.2161000e-01
  -3.0527000e-01
  -3.1915000e-01
  -3.5356000e-01
  -2.5817000e-01
  -3.1594000e-01
  -4.2961000e-01
  -2.2806000e-01
  -8.5020000e-02
  -7.4220000e-02
  -1.0413000e-01
   5.7360000e-02
   6.2180000e-02
   7.7290000e-02
   2.1841000e-01
   2.4186000e-01
   1.5198000e-01
   2.1085000e-01
   3.8484000e-01
   3.3340000e-01
   3.2600000e-01
   5.1719000e-01
   3.9937000e-01
   4.5322000e-01
   4.3419000e-01
   2.5556000e-01
   3.2633000e-01
   3.6085000e-01
   1.6903000e-01
   1.4699000e-01
   1.8145000e-01
   8.0610000e-02
   7.0330000e-02
   1.9550000e-02
   9.0510000e-02
  -1.3890000e-01
   1.0750000e-02
  -7.5890000e-02
  -1.4279000e-01
  -1.1675000e-01
  -1.8491000e-01
  -2.3848000e-01
  -2.5299000e-01
  -3.3628000e-01
  -3.3088000e-01
  -3.0478000e-01
  -3.5937000e-01
  -3.4308000e-01
  -3.4742000e-01
  -2.0734000e-01
  -3.2326000e-01
  -3.4489000e-01
  -2.7906000e-01
  -3.1898000e-01
  -2.6788000e-01
  -1.9845000e-01
  -2.2444000e-01
  -1.9365000e-01
  -1.2629000e-01
  -6.8500000e-03
  -3.0570000e-02
   4.7930000e-02
   2.9409000e-01
   2.4567000e-01
   4.9632000e-01
   4.3850000e-01
   4.4809000e-01
   5.7222000e-01
   4.9967000e-01
   4.8511000e-01
   4.7516000e-01
   5.0156000e-01
   3.7749000e-01
   3.4059000e-01
   3.3713000e-01
   2.2488000e-01
   1.8718000e-01
   1.4795000e-01
   2.2240000e-02
   1.1200000e-03
  -1.3498000e-01
  -9.1770000e-02
  -1.7021000e-01
  -2.4997000e-01
  -3.2784000e-01
  -2.4331000e-01
  -3.4393000e-01
  -4.0148000e-01
  -3.9616000e-01
  -2.3067000e-01
  -2.4465000e-01
  -2.5458000e-01
  -1.4754000e-01
  -2.1375000e-01
  -1.3361000e-01
  -8.0640000e-02
  -7.3450000e-02
  -1.3440000e-01
  -1.4551000e-01
  -1.5560000e-01
  -1.4345000e-01
  -1.6155000e-01
  -1.9949000e-01
  -2.7230000e-02
  -3.5070000e-02
  -2.3940000e-02
   5.0390000e-02
   1.4515000e-01
   1.4008000e-01
   3.3180000e-02
   2.5713000e-01
   3.6175000e-01
   3.4522000e-01
   5.0096000e-01
   4.5668000e-01
   4.4990000e-01
   4.8656000e-01
   4.7285000e-01
   3.9405000e-01
   2.9436000e-01
   2.9474000e-01
   2.4512000e-01
   1.5371000e-01
   1.5828000e-01
   3.7260000e-02
   9.3770000e-02
   7.0200000e-03
  -1.3284000e-01
  -6.4510000e-02
  -1.3695000e-01
  -1.8803000e-01
  -2.1836000e-01
  -2.4312000e-01
  -2.5337000e-01
  -3.5679000e-01
  -3.1745000e-01
  -4.2347000e-01
  -4.3244000e-01
  -3.8531000e-01
  -3.9263000e-01
  -3.6252000e-01
  -3.8421000e-01
  -2.5864000e-01
  -3.1355000e-01
  -2.3522000e-01
  -1.9152000e-01
  -2.1688000e-01
  -6.8680000e-02
   6.0180000e-02
   1.9670000e-01
   1.9174000e-01
   2.3824000e-01
   2.8784000e-01
   3.2348000e-01
   4.3466000e-01
   4.1453000e-01
   4.3905000e-01
   5.1977000e-01
   4.0242000e-01
   4.8420000e-01
   4.5361000e-01
   4.5769000e-01
   4.0883000e-01
   2.9510000e-01
   3.6398000e-01
   3.5158000e-01
   1.8620000e-01
   1.5667000e-01
   3.5230000e-02
   5.3380000e-02
  -4.6500000e-02
  -2.4646000e-01
  -2.1745000e-01
  -3.6781000e-01
  -3.1797000e-01
  -3.5992000e-01
  -3.6365000e-01
  -4.0387000e-01
  -4.7979000e-01
  -2.6966000e-01
  -3.2611000e-01
  -3.4237000e-01
  -3.4089000e-01
  -1.7339000e-01
  -1.8631000e-01
  -3.1131000e-01
  -1.5883000e-01
  -2.3700000e-01
  -1.4765000e-01
   9.5250000e-02
  -2.0450000e-02
  -4.3240000e-02
   1.1576000e-01
   1.5924000e-01
   3.8520000e-02
   1.4707000e-01
   1.2017000e-01
   1.9305000e-01
   3.1676000e-01
   4.3562000e-01
   3.6154000e-01
   4.0190000e-01
   5.0460000e-01
   3.9071000e-01
   5.1842000e-01
   3.2995000e-01
   3.9627000e-01
   3.5520000e-01
   2.6705000e-01
   1.1592000e-01
   1.7880000e-02
  -2.0840000e-02
  -4.7200000e-03
  -1.4151000e-01
  -1.4076000e-01
  -2.0638000e-01
  -1.6898000e-01
  -2.1754000e-01
  -2.4567000e-01
  -1.6928000e-01
  -3.0116000e-01
  -2.5902000e-01
  -2.8559000e-01
  -3.5978000e-01
  -3.8909000e-01
  -4.0329000e-01
  -2.3316000e-01
  -4.6888000e-01
  -3.9452000e-01
  -4.0239000e-01
  -3.3121000e-01
  -3.0220000e-01
  -2.8049000e-01
  -1.9500000e-01
  -1.1258000e-01
  -4.7930000e-02
  -4.2580000e-02
   5.8650000e-02
   1.9637000e-01
   1.6232000e-01
   1.7984000e-01
   2.8973000e-01
   3.0527000e-01
   2.8490000e-01
   5.0310000e-01
   4.8231000e-01
   4.5887000e-01
   4.4949000e-01
   3.9271000e-01
   2.9483000e-01
   2.7328000e-01
   1.8850000e-01
   2.2650000e-01
   1.7164000e-01
   1.6912000e-01
   9.8210000e-02
   2.6290000e-02
   1.2382000e-01
   7.0350000e-02
   1.4288000e-01
   5.3110000e-02
   1.6810000e-02
  -3.8220000e-02
  -1.7372000e-01
  -8.9190000e-02
  -2.1877000e-01
  -2.4457000e-01
  -1.2969000e-01
  -2.7761000e-01
  -2.6812000e-01
  -3.6299000e-01
  -2.3484000e-01
  -4.1215000e-01
  -3.4783000e-01
  -3.0031000e-01
  -3.0456000e-01
  -2.8888000e-01
  -3.4506000e-01
  -2.8855000e-01
  -2.2370000e-01
  -1.7408000e-01
  -1.7306000e-01
  -3.8580000e-02
   1.4384000e-01
   8.8400000e-02
   2.0396000e-01
   2.6272000e-01
   2.2719000e-01
   4.3365000e-01
   3.8418000e-01
   5.1971000e-01
   4.9813000e-01
   6.0197000e-01
   5.0246000e-01
   4.6057000e-01
   6.5288000e-01
   4.2301000e-01
   3.5663000e-01
   2.9019000e-01
   2.2203000e-01
   2.0673000e-01
   1.2755000e-01
   1.1488000e-01
   7.6200000e-03
  -1.4329000e-01
  -9.9120000e-02
  -1.9313000e-01
  -1.7589000e-01
  -2.9699000e-01
  -3.3022000e-01
  -2.2011000e-01
  -3.5951000e-01
  -3.7382000e-01
  -3.9285000e-01
  -4.0307000e-01
  -4.7677000e-01
  -3.9542000e-01
  -4.5435000e-01
  -4.9375000e-01
  -2.8367000e-01
  -2.5614000e-01
  -3.3563000e-01
  -1.3832000e-01
  -1.7103000e-01
  -6.4840000e-02
   1.5190000e-02
   4.5840000e-02
   1.2947000e-01
   1.7649000e-01
   3.3697000e-01
   2.5120000e-01
   2.0926000e-01
   4.2103000e-01
   4.3326000e-01
   4.3428000e-01
   3.8673000e-01
   4.6518000e-01
   4.0527000e-01
   4.1519000e-01
   3.8580000e-01
   2.6360000e-01
   3.2850000e-01
   2.6511000e-01
   1.8798000e-01
   1.3909000e-01
   1.1093000e-01
   1.3306000e-01
   1.7190000e-02
  -1.3650000e-02
  -1.0051000e-01
  -2.4268000e-01
  -1.7380000e-01
  -2.9532000e-01
  -3.9493000e-01
  -1.9190000e-01
  -2.2428000e-01
  -1.6881000e-01
  -3.3634000e-01
  -1.5255000e-01
  -1.9566000e-01
  -2.2593000e-01
  -6.1910000e-02
  -1.2906000e-01
  -2.3711000e-01
  -1.3503000e-01
  -1.6264000e-01
  -2.1556000e-01
  -2.2938000e-01
  -1.3876000e-01
  -1.8378000e-01
  -1.3142000e-01
  -1.1283000e-01
  -5.7080000e-02
  -1.3110000e-02
  -4.5570000e-02
   2.1652000e-01
   2.3297000e-01
   3.2299000e-01
   3.3584000e-01
   3.9896000e-01
   3.4761000e-01
   5.1782000e-01
   4.3307000e-01
   5.9311000e-01
   4.2674000e-01
   4.1887000e-01
   3.9885000e-01
   3.4772000e-01
   2.6066000e-01
   1.2560000e-01
   2.7410000e-01
  -1.9710000e-02
   4.8750000e-02
  -2.6650000e-02
  -1.2245000e-01
  -2.1844000e-01
  -1.9009000e-01
  -2.9889000e-01
  -2.8685000e-01
  -2.8951000e-01
