# Supplementary material for: A Novel Classification Method for Flutter Signals Based on the CNN and STFT
Source: Hindawi journal article supplement (doi:10.1155/2019/9375437), 2019-04-09
Supplement: f1 [file 9375437.f1.zip › 01_9_z29.5_31channel.txt]

  -5.6920000e-02
  -7.3150000e-02
  -2.2620000e-02
  -1.2031000e-01
  -3.3010000e-02
  -7.2140000e-02
  -8.9140000e-02
  -5.1030000e-02
  -9.2510000e-02
  -3.6820000e-02
  -9.2970000e-02
  -5.1110000e-02
  -3.5420000e-02
  -3.3830000e-02
  -2.7640000e-02
  -2.6540000e-02
  -1.4300000e-03
  -6.0600000e-03
   1.4200000e-02
   7.1300000e-03
   5.1900000e-02
   3.2710000e-02
   4.3650000e-02
   5.5440000e-02
   2.5250000e-02
   8.1430000e-02
   7.4600000e-03
   5.6840000e-02
   3.6140000e-02
   1.5900000e-02
   9.4590000e-02
   9.5100000e-03
   5.6260000e-02
   7.2270000e-02
   1.6830000e-02
   7.4660000e-02
  -1.2530000e-02
   4.0770000e-02
  -5.7000000e-03
   8.2000000e-03
   3.3700000e-03
  -4.1810000e-02
   1.6200000e-02
  -7.6030000e-02
  -8.9400000e-03
  -4.8120000e-02
  -6.0840000e-02
  -4.4910000e-02
  -1.1480000e-01
  -2.6840000e-02
  -1.0995000e-01
  -6.5800000e-02
  -6.6900000e-02
  -5.8650000e-02
  -6.0700000e-02
  -8.6500000e-02
   2.0540000e-02
  -6.7640000e-02
   3.7000000e-03
  -3.0760000e-02
   1.6560000e-02
  -7.3500000e-03
  -3.4410000e-02
   6.1330000e-02
  -6.5720000e-02
   6.4620000e-02
  -1.3110000e-02
   2.4050000e-02
   2.4160000e-02
   1.1840000e-02
   8.0580000e-02
   3.4350000e-02
   7.1120000e-02
   6.0650000e-02
   5.8730000e-02
   5.0750000e-02
   7.8310000e-02
   2.6710000e-02
   3.2220000e-02
   5.5930000e-02
   3.8000000e-04
   6.3640000e-02
  -2.7800000e-02
   1.7140000e-02
   1.7110000e-02
  -3.6250000e-02
   1.2090000e-02
  -5.5220000e-02
   1.4040000e-02
  -4.0470000e-02
  -7.0000000e-02
  -2.9090000e-02
  -7.9650000e-02
  -2.5200000e-02
  -9.4780000e-02
  -5.2830000e-02
  -3.9540000e-02
  -8.4040000e-02
  -7.9210000e-02
  -5.9550000e-02
  -4.6200000e-02
  -7.7950000e-02
  -3.0240000e-02
  -3.8520000e-02
  -7.4000000e-03
  -2.7310000e-02
  -6.4400000e-03
   2.9750000e-02
  -4.1100000e-02
   4.1100000e-02
   1.9470000e-02
   3.2570000e-02
   1.2310000e-02
   4.9980000e-02
   5.1710000e-02
   2.8080000e-02
   5.9630000e-02
   2.6900000e-02
   8.3570000e-02
   3.4820000e-02
   7.2820000e-02
   6.9830000e-02
   3.7260000e-02
   6.7420000e-02
   4.1870000e-02
   4.9300000e-02
  -2.6000000e-03
   2.9040000e-02
   2.0320000e-02
  -1.5270000e-02
  -3.8100000e-03
  -5.2260000e-02
  -2.2240000e-02
  -6.6570000e-02
  -4.2250000e-02
  -2.3200000e-02
  -7.6580000e-02
  -4.1620000e-02
  -5.1240000e-02
  -4.3130000e-02
  -4.3320000e-02
  -5.3880000e-02
  -1.7190000e-02
  -7.4080000e-02
  -3.6140000e-02
  -5.0700000e-02
  -5.8350000e-02
  -2.6900000e-02
  -4.5290000e-02
  -3.5420000e-02
  -4.7210000e-02
   4.5000000e-03
  -2.5470000e-02
  -1.8150000e-02
   1.3960000e-02
  -1.0670000e-02
   2.6540000e-02
   3.2440000e-02
   4.4470000e-02
   3.8140000e-02
   4.5820000e-02
   8.3270000e-02
   1.6400000e-02
   5.9170000e-02
   8.7740000e-02
   4.2220000e-02
   3.4050000e-02
   6.8410000e-02
   6.9090000e-02
   2.1000000e-02
   1.9300000e-02
   2.5580000e-02
   4.2440000e-02
  -3.0570000e-02
  -3.4300000e-03
   8.6400000e-03
  -1.7520000e-02
  -2.2590000e-02
  -3.3810000e-02
  -4.3320000e-02
  -4.4140000e-02
  -4.8750000e-02
  -4.5570000e-02
  -4.9930000e-02
  -6.3530000e-02
  -4.8310000e-02
  -4.0280000e-02
  -6.7040000e-02
  -5.6480000e-02
  -6.5120000e-02
  -6.0870000e-02
  -2.3200000e-02
  -7.1810000e-02
  -3.1420000e-02
  -8.4060000e-02
  -2.2620000e-02
  -3.5970000e-02
  -3.3200000e-02
  -1.8780000e-02
   8.3400000e-03
   1.5000000e-02
   2.7610000e-02
   6.1750000e-02
   1.8340000e-02
   5.7820000e-02
   7.6550000e-02
   7.2580000e-02
   4.3350000e-02
   8.0530000e-02
   6.7450000e-02
   4.2640000e-02
   8.6260000e-02
   3.5040000e-02
   4.8340000e-02
   1.0610000e-02
   4.9430000e-02
   3.0080000e-02
  -2.0070000e-02
   4.4770000e-02
   4.3900000e-03
  -4.3000000e-03
  -9.0200000e-03
  -2.0810000e-02
  -1.1300000e-02
  -4.6580000e-02
  -3.3940000e-02
  -6.3770000e-02
  -5.4750000e-02
  -5.8480000e-02
  -7.5510000e-02
  -8.3210000e-02
  -7.6830000e-02
  -7.7980000e-02
  -9.1470000e-02
  -7.5980000e-02
  -6.6570000e-02
  -5.1770000e-02
  -6.6870000e-02
  -2.4400000e-02
  -4.6910000e-02
  -1.7330000e-02
  -3.3700000e-03
  -9.1300000e-03
   2.3610000e-02
  -9.2400000e-03
   5.4560000e-02
   2.1170000e-02
   7.5730000e-02
   4.3240000e-02
   5.8920000e-02
   1.0142000e-01
   8.9900000e-03
   1.3131000e-01
   3.3830000e-02
   6.4080000e-02
   5.2940000e-02
   1.3020000e-02
   7.2300000e-02
  -1.1490000e-02
   3.7860000e-02
   2.1500000e-02
   8.7200000e-03
   2.6380000e-02
  -1.0910000e-02
   2.9900000e-03
  -1.8180000e-02
  -5.0400000e-03
  -1.6700000e-03
  -5.2970000e-02
  -2.9610000e-02
  -2.4620000e-02
  -4.6280000e-02
  -3.8470000e-02
  -6.7170000e-02
  -4.5350000e-02
  -1.0997000e-01
  -2.9060000e-02
  -9.5250000e-02
  -6.1250000e-02
  -6.2710000e-02
  -9.1990000e-02
  -1.8370000e-02
  -9.4180000e-02
  -9.2100000e-03
  -3.6140000e-02
  -3.1860000e-02
   1.7660000e-02
  -7.6200000e-03
   2.8270000e-02
   1.9000000e-02
   1.3850000e-02
   7.3510000e-02
   2.6810000e-02
   4.2170000e-02
   3.7370000e-02
   3.8800000e-02
   7.4660000e-02
   3.3480000e-02
   5.2040000e-02
   3.4440000e-02
   6.1860000e-02
   4.0500000e-02
   3.7860000e-02
   4.3130000e-02
   5.1850000e-02
   1.4750000e-02
   4.6720000e-02
   1.9080000e-02
   6.2800000e-03
   2.8320000e-02
  -3.5100000e-03
   8.5000000e-03
  -2.9100000e-03
  -5.6040000e-02
   5.5700000e-03
  -4.8670000e-02
  -7.5760000e-02
  -5.8980000e-02
  -9.1060000e-02
  -3.9070000e-02
  -1.0306000e-01
  -9.3390000e-02
  -6.5390000e-02
  -1.0518000e-01
  -3.4490000e-02
  -6.7940000e-02
  -6.8960000e-02
  -1.1430000e-02
  -4.4640000e-02
   1.5930000e-02
  -4.1130000e-02
   3.1590000e-02
   1.5160000e-02
  -1.1000000e-03
   1.7740000e-02
   3.6820000e-02
   1.1760000e-02
   8.4200000e-03
   4.9980000e-02
   2.0780000e-02
   5.5960000e-02
   4.0140000e-02
   5.6760000e-02
   7.2660000e-02
   4.5100000e-02
   5.7520000e-02
   5.5220000e-02
   5.3850000e-02
   6.9780000e-02
   3.2220000e-02
   5.4450000e-02
   3.5670000e-02
   4.2850000e-02
  -8.0000000e-04
   3.0200000e-03
  -1.9500000e-03
   1.5350000e-02
  -2.4350000e-02
  -6.0320000e-02
  -2.4460000e-02
  -3.6740000e-02
  -6.2900000e-02
  -8.0230000e-02
  -6.8600000e-02
  -1.0773000e-01
  -5.3770000e-02
  -7.6330000e-02
  -3.5040000e-02
  -8.2060000e-02
  -4.2610000e-02
  -3.9370000e-02
  -6.0570000e-02
  -5.7220000e-02
  -3.2660000e-02
  -2.3250000e-02
  -2.5530000e-02
  -2.0000000e-03
  -1.6970000e-02
   1.7740000e-02
  -1.4500000e-03
  -3.3500000e-03
   3.6850000e-02
   1.5100000e-03
   5.4840000e-02
   4.7680000e-02
   4.3870000e-02
   4.2220000e-02
   8.9410000e-02
   7.5650000e-02
   3.9210000e-02
   1.0422000e-01
   7.8880000e-02
   7.7510000e-02
   5.8350000e-02
   6.3340000e-02
   5.0150000e-02
   4.2740000e-02
   2.3390000e-02
  -9.7300000e-03
  -1.1460000e-02
  -2.0670000e-02
  -3.0960000e-02
  -5.4070000e-02
  -5.7850000e-02
  -5.1130000e-02
  -6.5200000e-02
  -5.0670000e-02
  -6.5470000e-02
  -4.2500000e-02
  -9.4700000e-02
  -2.9060000e-02
  -8.1430000e-02
  -7.5510000e-02
  -3.9540000e-02
  -6.1010000e-02
  -5.5440000e-02
  -7.8720000e-02
  -2.0430000e-02
  -4.2440000e-02
  -6.0020000e-02
  -3.2630000e-02
  -3.6960000e-02
  -5.7000000e-03
  -1.7250000e-02
   2.1360000e-02
   1.1190000e-02
   2.6600000e-02
   8.0250000e-02
   2.9010000e-02
   3.7860000e-02
   6.6600000e-02
   9.3470000e-02
   9.5470000e-02
   2.5580000e-02
   9.9860000e-02
   3.9480000e-02
   8.0990000e-02
   6.5120000e-02
   2.2480000e-02
   6.9420000e-02
   2.4400000e-02
   2.3390000e-02
  -1.2610000e-02
   5.7900000e-03
   1.1930000e-02
  -1.9220000e-02
  -1.8370000e-02
  -1.9660000e-02
  -5.3790000e-02
  -7.6800000e-03
  -2.7690000e-02
  -4.8310000e-02
  -7.9320000e-02
  -8.6830000e-02
  -3.3860000e-02
  -1.0334000e-01
  -7.4850000e-02
  -1.1740000e-01
  -5.4210000e-02
  -8.6260000e-02
  -6.0730000e-02
  -8.0060000e-02
  -6.1550000e-02
  -6.0240000e-02
  -3.7840000e-02
  -2.1850000e-02
  -3.7890000e-02
  -7.2400000e-03
   4.8340000e-02
   1.9000000e-04
   3.6080000e-02
   3.9730000e-02
   7.4580000e-02
   7.5130000e-02
   6.0590000e-02
   9.4040000e-02
   7.6220000e-02
   8.6150000e-02
   7.0680000e-02
   8.0830000e-02
   3.4880000e-02
   6.4460000e-02
  -1.1710000e-02
   7.9050000e-02
   1.1800000e-03
   2.8730000e-02
  -1.9700000e-03
  -1.6860000e-02
   6.4820000e-02
  -4.8640000e-02
   2.2650000e-02
  -5.4010000e-02
  -1.7160000e-02
  -1.6590000e-02
  -6.6930000e-02
  -5.1410000e-02
  -5.1030000e-02
  -5.5000000e-02
  -8.1840000e-02
  -7.2930000e-02
  -8.0090000e-02
  -6.9750000e-02
  -8.1320000e-02
  -6.4870000e-02
  -7.9900000e-02
  -4.9300000e-02
  -4.5100000e-02
  -5.3490000e-02
  -2.4130000e-02
  -1.0720000e-02
  -1.9770000e-02
   1.4590000e-02
   1.7520000e-02
   2.0290000e-02
   5.4150000e-02
   3.2960000e-02
   4.2360000e-02
   4.0060000e-02
   1.1900000e-02
   9.5740000e-02
   4.8090000e-02
   4.2740000e-02
   5.4210000e-02
   3.2490000e-02
   5.8430000e-02
   4.7460000e-02
   1.2780000e-02
   5.5520000e-02
   2.5940000e-02
   5.6760000e-02
   3.0240000e-02
  -8.0000000e-05
   4.0850000e-02
   2.9090000e-02
   6.6900000e-03
  -3.9240000e-02
   2.6300000e-03
  -2.2290000e-02
  -2.9310000e-02
  -8.1950000e-02
  -4.5570000e-02
  -3.6360000e-02
  -7.8390000e-02
  -7.1290000e-02
  -1.0090000e-01
  -3.7210000e-02
  -9.1520000e-02
  -8.1490000e-02
  -7.3950000e-02
  -8.6780000e-02
  -9.1300000e-03
  -5.8670000e-02
  -2.0450000e-02
  -2.9450000e-02
  -2.0890000e-02
   4.5800000e-03
  -2.3280000e-02
  -3.0700000e-03
   9.3800000e-03
   5.8700000e-03
   3.2520000e-02
   2.1500000e-02
   2.7340000e-02
   4.1570000e-02
   5.9800000e-02
   3.7920000e-02
   4.8830000e-02
   3.7400000e-02
   8.6260000e-02
   5.7190000e-02
   5.7300000e-02
   5.7520000e-02
   6.1770000e-02
   9.3550000e-02
   9.6000000e-03
   3.6220000e-02
   2.0870000e-02
   2.8820000e-02
   7.8700000e-03
  -1.5710000e-02
   4.3600000e-03
  -3.7290000e-02
  -3.2600000e-03
  -7.3780000e-02
  -4.3240000e-02
  -7.2600000e-02
  -5.7820000e-02
  -5.5440000e-02
  -1.3251000e-01
  -3.1530000e-02
  -1.0323000e-01
  -6.2920000e-02
  -9.2480000e-02
  -7.8440000e-02
  -5.5580000e-02
  -6.6380000e-02
  -2.5720000e-02
  -6.8660000e-02
  -2.5660000e-02
  -2.3110000e-02
  -6.8000000e-03
  -8.9700000e-03
  -8.0900000e-03
  -5.5400000e-03
   2.2700000e-02
   1.9330000e-02
   6.2870000e-02
   2.3740000e-02
   2.6400000e-02
   5.3580000e-02
   5.7280000e-02
   3.7620000e-02
   5.8590000e-02
   6.9940000e-02
   4.3730000e-02
   8.0830000e-02
   7.0160000e-02
   6.7940000e-02
   7.3450000e-02
   4.8280000e-02
   5.5990000e-02
   9.7600000e-03
   3.6080000e-02
   2.3830000e-02
  -2.6270000e-02
  -2.4570000e-02
  -3.1040000e-02
  -5.2420000e-02
  -6.3060000e-02
  -7.7570000e-02
  -5.2150000e-02
  -1.0986000e-01
  -5.1160000e-02
  -4.8780000e-02
  -1.0594000e-01
  -6.3280000e-02
  -7.0630000e-02
  -4.2440000e-02
  -7.6960000e-02
  -7.7570000e-02
  -3.9510000e-02
  -5.6430000e-02
  -5.8620000e-02
  -2.5140000e-02
  -4.5100000e-02
  -3.3500000e-03
  -1.4890000e-02
   2.2950000e-02
   7.5400000e-03
   2.9390000e-02
   1.5900000e-02
   4.4970000e-02
   6.9260000e-02
   4.0660000e-02
   6.7150000e-02
   5.2640000e-02
   1.2961000e-01
   5.1520000e-02
   7.9070000e-02
   7.6960000e-02
   6.1800000e-02
   8.5680000e-02
   1.9270000e-02
   6.9230000e-02
   1.0860000e-02
   1.4150000e-02
   1.5240000e-02
  -2.6570000e-02
  -1.0800000e-02
  -5.4300000e-03
  -3.8170000e-02
  -5.0480000e-02
  -5.6210000e-02
  -2.6180000e-02
  -6.2790000e-02
  -3.9810000e-02
  -8.1730000e-02
  -5.4450000e-02
  -6.0760000e-02
  -7.8990000e-02
  -6.7970000e-02
  -9.4890000e-02
  -5.5110000e-02
  -6.0840000e-02
  -7.2800000e-02
  -6.6630000e-02
  -2.9830000e-02
  -4.6610000e-02
  -3.9760000e-02
   4.7200000e-03
  -9.1600000e-03
  -9.7900000e-03
   9.1000000e-03
   5.9660000e-02
   2.9500000e-02
   1.4750000e-02
   6.7120000e-02
   4.7950000e-02
   6.6380000e-02
   5.0890000e-02
   6.8240000e-02
   6.2240000e-02
   6.5090000e-02
   5.3160000e-02
   3.7340000e-02
   2.8510000e-02
   3.1860000e-02
   5.2090000e-02
   2.1330000e-02
   2.7010000e-02
   4.9630000e-02
   2.5010000e-02
   2.0450000e-02
  -8.8800000e-03
   2.8160000e-02
  -1.2090000e-02
  -1.7470000e-02
  -3.7000000e-03
  -3.3040000e-02
  -1.8670000e-02
  -6.8050000e-02
  -6.2920000e-02
  -4.1430000e-02
  -1.2368000e-01
  -5.0970000e-02
  -9.5280000e-02
  -5.8840000e-02
  -9.8840000e-02
  -8.0310000e-02
  -7.0710000e-02
  -8.2200000e-02
  -5.8590000e-02
  -6.9940000e-02
  -3.7600000e-03
  -2.9200000e-02
  -8.2500000e-03
  -1.9140000e-02
  -2.9100000e-03
   4.5160000e-02
   2.8650000e-02
   1.5190000e-02
   6.0320000e-02
   6.7200000e-02
   4.8890000e-02
   8.1600000e-02
   3.9730000e-02
   9.1960000e-02
   7.9020000e-02
   2.8270000e-02
   8.0340000e-02
   5.8870000e-02
   6.5340000e-02
   1.7660000e-02
   6.1800000e-02
   6.4380000e-02
   5.4800000e-03
   2.9580000e-02
   8.7500000e-03
   4.2060000e-02
  -1.1020000e-02
  -4.1370000e-02
  -1.8860000e-02
  -3.6800000e-02
  -4.0960000e-02
  -6.7390000e-02
  -7.0520000e-02
  -6.3280000e-02
  -9.5360000e-02
  -9.0590000e-02
  -7.5240000e-02
  -9.3470000e-02
  -5.5440000e-02
  -1.0899000e-01
  -5.5380000e-02
  -4.6670000e-02
  -3.5150000e-02
  -6.4130000e-02
  -4.4990000e-02
  -2.2620000e-02
  -6.4700000e-03
  -1.4090000e-02
   2.9900000e-03
   2.2320000e-02
   2.0590000e-02
   4.6390000e-02
   1.1490000e-02
   7.3590000e-02
   1.0450000e-02
   5.8730000e-02
   7.1200000e-02
   4.3050000e-02
   6.1360000e-02
   4.9740000e-02
   8.5020000e-02
   5.2260000e-02
   6.2810000e-02
   8.5240000e-02
   4.8060000e-02
   5.4780000e-02
   4.3050000e-02
   4.3380000e-02
   3.5070000e-02
   3.4300000e-03
   1.0940000e-02
  -2.8600000e-02
  -2.5550000e-02
  -1.9600000e-02
  -7.1840000e-02
  -4.3650000e-02
  -1.0345000e-01
  -5.0070000e-02
  -8.1600000e-02
  -7.6250000e-02
  -6.1250000e-02
  -1.0575000e-01
  -4.4580000e-02
  -9.0920000e-02
  -8.3930000e-02
  -7.3150000e-02
  -9.9750000e-02
  -6.2570000e-02
  -5.8540000e-02
  -5.1570000e-02
  -1.3080000e-02
  -3.1560000e-02
  -2.8980000e-02
   4.0600000e-03
  -1.0580000e-02
   3.6440000e-02
   1.3110000e-02
   6.6790000e-02
   5.2920000e-02
   5.7800000e-02
   7.7980000e-02
   8.2720000e-02
   8.4390000e-02
   5.1460000e-02
   9.1600000e-02
   7.8720000e-02
   8.1510000e-02
   6.6350000e-02
   5.0070000e-02
   6.0480000e-02
   5.4040000e-02
   6.4620000e-02
  -6.9400000e-03
   4.8800000e-02
  -8.7700000e-03
  -2.9600000e-03
  -2.4700000e-02
  -7.3010000e-02
  -6.4400000e-03
  -1.1543000e-01
  -3.5400000e-03
  -1.1176000e-01
  -8.8010000e-02
  -6.9420000e-02
  -1.1875000e-01
  -4.8940000e-02
  -1.4427000e-01
  -7.4190000e-02
  -9.6510000e-02
  -8.9850000e-02
  -2.6290000e-02
  -9.9770000e-02
  -2.0870000e-02
  -5.6590000e-02
  -3.2440000e-02
  -3.6930000e-02
   2.1900000e-03
   1.7000000e-02
  -1.0610000e-02
   1.4230000e-02
   6.8300000e-03
   4.9000000e-02
   6.7230000e-02
  -1.2300000e-03
   8.2990000e-02
   3.5400000e-02
   6.9500000e-02
   7.0660000e-02
   5.7060000e-02
   1.0106000e-01
   2.0590000e-02
   1.1751000e-01
   3.6000000e-02
   5.9220000e-02
   6.4710000e-02
   1.3330000e-02
   5.5880000e-02
  -2.5120000e-02
   2.9260000e-02
  -8.1200000e-03
  -1.2200000e-02
  -5.2600000e-03
  -6.2760000e-02
  -1.7800000e-03
  -4.5620000e-02
  -4.0250000e-02
  -7.3430000e-02
  -5.8240000e-02
  -7.3400000e-02
  -6.1770000e-02
  -9.4890000e-02
  -9.4130000e-02
  -7.4600000e-02
  -1.0803000e-01
  -5.7440000e-02
  -1.1713000e-01
  -7.5210000e-02
  -5.8760000e-02
  -8.2060000e-02
  -2.6570000e-02
  -7.5150000e-02
   1.2230000e-02
  -2.4290000e-02
  -1.2170000e-02
   4.4200000e-02
   1.9380000e-02
   9.6700000e-02
   2.4400000e-02
   8.5930000e-02
   6.1200000e-02
   6.3830000e-02
   1.0498000e-01
   6.6960000e-02
   8.7270000e-02
   5.5850000e-02
   9.1270000e-02
   3.1670000e-02
   5.2040000e-02
   5.7140000e-02
   8.9100000e-03
   3.6490000e-02
   2.7250000e-02
   4.0330000e-02
  -3.5900000e-03
   1.7410000e-02
   3.2630000e-02
  -3.4790000e-02
  -1.7710000e-02
  -5.8320000e-02
  -3.3040000e-02
  -7.1810000e-02
  -8.6090000e-02
  -6.1470000e-02
  -1.0419000e-01
  -6.2100000e-02
  -1.2237000e-01
  -5.7630000e-02
  -1.0296000e-01
  -8.7410000e-02
  -3.9240000e-02
  -1.1337000e-01
  -3.8630000e-02
  -3.8390000e-02
  -4.9790000e-02
  -5.3790000e-02
  -3.1390000e-02
   1.7220000e-02
  -4.9600000e-03
   7.6200000e-03
   3.5620000e-02
   2.5690000e-02
   4.8750000e-02
   6.2400000e-02
   4.0300000e-02
   6.7910000e-02
   5.1030000e-02
   6.1940000e-02
   7.5180000e-02
   8.7380000e-02
   4.8390000e-02
   7.6720000e-02
   6.1660000e-02
   5.4400000e-02
   5.4730000e-02
   5.0280000e-02
   3.3070000e-02
   4.4420000e-02
   3.2240000e-02
   8.6100000e-03
   4.8000000e-03
   8.4200000e-03
  -1.8420000e-02
  -8.6600000e-03
  -2.7940000e-02
  -3.8600000e-02
  -4.9630000e-02
  -6.5640000e-02
  -5.5630000e-02
  -7.9430000e-02
  -1.1373000e-01
  -7.0080000e-02
  -1.4192000e-01
  -1.0084000e-01
  -8.1570000e-02
  -1.1998000e-01
  -7.1340000e-02
  -1.0597000e-01
  -5.7960000e-02
  -6.5580000e-02
  -5.9770000e-02
   3.2100000e-03
   8.0000000e-04
   2.1140000e-02
   1.2390000e-02
   7.4300000e-02
   2.3390000e-02
   8.2310000e-02
   6.5530000e-02
   3.5560000e-02
   8.5980000e-02
   4.3430000e-02
   1.0197000e-01
   3.4550000e-02
   5.2530000e-02
   8.6280000e-02
   6.8350000e-02
   5.2620000e-02
   5.6650000e-02
   7.7070000e-02
   5.4640000e-02
   6.5470000e-02
   3.3450000e-02
   5.0750000e-02
  -1.6730000e-02
   4.3130000e-02
  -2.5470000e-02
  -3.3560000e-02
  -4.4990000e-02
  -3.7700000e-02
  -5.1190000e-02
  -8.3270000e-02
  -8.3840000e-02
  -1.1107000e-01
  -6.8680000e-02
  -1.2755000e-01
  -9.2320000e-02
  -1.0221000e-01
  -9.3170000e-02
  -8.5270000e-02
  -7.9290000e-02
  -5.4180000e-02
  -4.5350000e-02
  -3.9150000e-02
  -1.5350000e-02
  -3.6690000e-02
   1.9200000e-03
   4.3600000e-03
   1.2230000e-02
   2.1880000e-02
   2.1000000e-02
   4.4170000e-02
   2.6050000e-02
   6.9940000e-02
   5.2780000e-02
   6.3360000e-02
   4.0060000e-02
   8.4010000e-02
   7.3260000e-02
   6.2840000e-02
   7.9240000e-02
   8.4310000e-02
   7.1700000e-02
   6.5970000e-02
   3.0050000e-02
   4.7840000e-02
   4.3160000e-02
   2.4320000e-02
   9.9000000e-04
  -5.7300000e-03
   1.1760000e-02
  -3.1640000e-02
  -3.0460000e-02
  -3.5070000e-02
  -2.9750000e-02
  -5.3110000e-02
  -4.9680000e-02
  -8.3570000e-02
  -5.7390000e-02
  -7.6690000e-02
  -6.9810000e-02
  -9.3850000e-02
  -8.1100000e-02
  -7.2410000e-02
  -8.1210000e-02
  -6.2570000e-02
  -8.3190000e-02
  -3.3480000e-02
  -6.7750000e-02
  -4.6340000e-02
   4.1400000e-03
  -6.4730000e-02
   1.6730000e-02
  -6.2500000e-03
  -1.4590000e-02
   3.6880000e-02
  -1.5710000e-02
   6.1280000e-02
   2.0100000e-02
   5.6340000e-02
   4.4880000e-02
   4.8640000e-02
   9.2840000e-02
   4.4140000e-02
   1.0285000e-01
   7.1810000e-02
   5.5490000e-02
   8.4450000e-02
   7.3120000e-02
   5.5410000e-02
   6.6050000e-02
   4.3950000e-02
   2.4760000e-02
   1.3080000e-02
  -8.2000000e-04
  -8.0300000e-03
  -2.4650000e-02
  -2.9800000e-02
  -6.2870000e-02
  -4.7870000e-02
  -5.1000000e-02
  -6.8220000e-02
  -5.8590000e-02
  -9.8920000e-02
  -5.2590000e-02
  -6.1330000e-02
  -6.6930000e-02
  -5.1520000e-02
  -1.0567000e-01
  -3.7560000e-02
  -6.5530000e-02
  -7.0880000e-02
  -3.1700000e-02
  -6.8520000e-02
  -2.0180000e-02
  -3.6800000e-02
  -3.6470000e-02
  -1.8100000e-02
  -1.5110000e-02
   1.3350000e-02
  -5.7900000e-03
   1.1240000e-02
   2.3420000e-02
   3.8660000e-02
   5.3600000e-02
   5.1380000e-02
   6.8740000e-02
   8.5680000e-02
   5.5740000e-02
   7.5540000e-02
   4.8120000e-02
   9.8130000e-02
   3.1260000e-02
   1.0221000e-01
   4.6640000e-02
   3.7010000e-02
   6.4540000e-02
   3.0190000e-02
   4.9900000e-02
  -2.8930000e-02
   2.1660000e-02
  -1.7880000e-02
  -3.6030000e-02
   1.2670000e-02
  -6.9810000e-02
  -2.6920000e-02
  -4.7650000e-02
  -6.1640000e-02
  -3.5750000e-02
  -9.1910000e-02
  -8.2860000e-02
  -8.3320000e-02
  -8.8010000e-02
  -8.3710000e-02
  -1.0737000e-01
  -9.7720000e-02
  -7.5400000e-02
  -8.1950000e-02
  -5.0120000e-02
  -6.1330000e-02
  -4.4610000e-02
  -2.7100000e-03
  -2.3690000e-02
   2.4870000e-02
   1.6780000e-02
   2.3250000e-02
   7.1010000e-02
   3.5340000e-02
   7.5480000e-02
   7.1890000e-02
   5.3250000e-02
   7.1970000e-02
   7.9620000e-02
   6.8870000e-02
   6.6600000e-02
   9.1300000e-02
   6.5800000e-02
   7.6850000e-02
   3.7700000e-02
   6.6080000e-02
   6.0400000e-02
   2.4180000e-02
   4.5730000e-02
   6.4700000e-03
   3.9540000e-02
  -3.1500000e-02
  -2.3830000e-02
  -9.7100000e-03
  -5.7500000e-02
   5.5000000e-04
  -7.0630000e-02
  -6.3720000e-02
  -4.3210000e-02
  -1.1192000e-01
  -4.7050000e-02
  -1.0904000e-01
  -8.8010000e-02
  -8.2170000e-02
  -1.1872000e-01
  -5.5690000e-02
  -1.0893000e-01
  -8.4390000e-02
  -3.8850000e-02
  -8.5710000e-02
  -2.4180000e-02
  -3.6030000e-02
  -2.1850000e-02
  -8.7200000e-03
   1.9550000e-02
   3.5180000e-02
   2.1220000e-02
   2.6870000e-02
   9.0480000e-02
   5.5710000e-02
   6.0620000e-02
   9.3080000e-02
   8.8640000e-02
   8.1160000e-02
   8.3930000e-02
   7.4030000e-02
   8.1380000e-02
   8.0440000e-02
   5.9500000e-02
   7.6720000e-02
   2.0150000e-02
   8.4310000e-02
   1.5490000e-02
   2.7140000e-02
   5.1630000e-02
  -2.6920000e-02
   5.3410000e-02
  -3.6000000e-02
   1.2800000e-02
  -4.1480000e-02
  -7.9460000e-02
  -1.0420000e-02
  -1.1110000e-01
  -6.8680000e-02
  -1.2130000e-01
  -1.1250000e-01
  -9.5000000e-02
  -1.4167000e-01
  -8.4230000e-02
  -1.1773000e-01
  -1.1694000e-01
  -6.8820000e-02
  -6.8900000e-02
  -5.0560000e-02
  -3.6330000e-02
  -3.9870000e-02
  -1.7500000e-03
   2.5010000e-02
   2.0150000e-02
   1.1980000e-02
   4.6390000e-02
   3.1170000e-02
   6.9010000e-02
   7.1420000e-02
   6.1530000e-02
   8.2890000e-02
   6.5780000e-02
   8.0970000e-02
   7.4880000e-02
   8.3100000e-02
   7.5070000e-02
   9.4760000e-02
   7.6410000e-02
   5.7080000e-02
   8.7660000e-02
   4.1760000e-02
   6.1500000e-02
  -2.5200000e-03
  -1.8100000e-02
   7.2550000e-02
  -6.5830000e-02
  -2.2800000e-03
  -1.8670000e-02
  -6.8440000e-02
  -9.9000000e-04
  -1.0775000e-01
  -3.5560000e-02
  -8.8750000e-02
  -9.9010000e-02
  -4.5820000e-02
  -1.2547000e-01
  -6.9720000e-02
  -1.0529000e-01
  -6.8220000e-02
  -5.2730000e-02
  -1.0507000e-01
  -6.3860000e-02
  -8.4480000e-02
  -4.0140000e-02
  -4.3070000e-02
  -2.4370000e-02
  -2.0840000e-02
  -1.5460000e-02
   4.6690000e-02
  -9.7900000e-03
   4.1020000e-02
   5.3050000e-02
   2.9600000e-03
   1.1359000e-01
   2.2020000e-02
   6.0680000e-02
   5.5820000e-02
   5.9630000e-02
   9.0620000e-02
   4.8150000e-02
   6.5690000e-02
   6.3880000e-02
   8.2010000e-02
   5.7690000e-02
   7.6910000e-02
   6.0130000e-02
   6.1910000e-02
   6.8710000e-02
   1.4420000e-02
   3.4080000e-02
  -1.5600000e-03
   1.7500000e-03
  -1.4560000e-02
  -5.7250000e-02
  -4.0000000e-02
  -6.0160000e-02
  -6.5640000e-02
  -8.2860000e-02
  -1.1011000e-01
  -8.1350000e-02
  -8.4200000e-02
  -8.6920000e-02
  -1.2242000e-01
  -8.8400000e-02
  -8.5600000e-02
  -6.2600000e-02
  -1.1346000e-01
  -6.7700000e-02
  -4.4990000e-02
  -7.6610000e-02
  -6.9900000e-03
  -7.1310000e-02
   1.2690000e-02
  -2.7230000e-02
   1.8600000e-03
   1.7490000e-02
  -1.1080000e-02
   9.0480000e-02
   3.3780000e-02
   1.0076000e-01
   3.7010000e-02
   1.3196000e-01
   8.7600000e-02
   8.5540000e-02
   1.1368000e-01
   7.7040000e-02
   1.2829000e-01
   2.4210000e-02
   1.0956000e-01
   6.6960000e-02
   4.6060000e-02
   4.4310000e-02
   2.8790000e-02
   3.1230000e-02
  -1.2010000e-02
  -8.4700000e-03
   1.0200000e-02
  -2.8730000e-02
  -4.1650000e-02
  -6.6490000e-02
  -4.6120000e-02
  -4.7320000e-02
  -7.3510000e-02
  -9.5220000e-02
  -7.3040000e-02
  -1.2730000e-01
  -8.7220000e-02
  -1.1274000e-01
  -1.2533000e-01
  -9.0530000e-02
  -1.4211000e-01
  -7.9840000e-02
  -1.0389000e-01
  -6.6930000e-02
  -2.4160000e-02
  -7.7510000e-02
   1.8810000e-02
  -2.5250000e-02
   3.3700000e-02
   3.5450000e-02
   2.2480000e-02
   8.6450000e-02
   4.5000000e-03
   1.2426000e-01
   5.3440000e-02
   9.8790000e-02
   6.5420000e-02
   7.5240000e-02
   1.0331000e-01
   3.9100000e-02
   1.3556000e-01
   3.5730000e-02
   1.3232000e-01
   6.5420000e-02
   3.5780000e-02
   7.5070000e-02
   1.6010000e-02
   5.7690000e-02
  -1.5740000e-02
   4.7210000e-02
  -7.5100000e-03
  -3.6990000e-02
   2.7000000e-04
  -6.2400000e-02
  -8.0100000e-03
  -8.2060000e-02
  -9.1960000e-02
  -8.3100000e-02
  -1.2338000e-01
  -7.4300000e-02
  -1.2489000e-01
  -1.1669000e-01
  -1.1856000e-01
  -1.1480000e-01
  -9.2040000e-02
  -7.5700000e-02
  -8.3320000e-02
  -6.3310000e-02
  -3.9590000e-02
  -4.1920000e-02
  -3.1150000e-02
  -5.2400000e-03
  -2.8710000e-02
   1.8040000e-02
   3.4270000e-02
   1.9270000e-02
   2.9340000e-02
   8.1930000e-02
   7.9020000e-02
   4.5020000e-02
   7.2270000e-02
   1.0191000e-01
   5.2860000e-02
   6.1530000e-02
   7.6060000e-02
   5.9550000e-02
   8.6940000e-02
   5.5550000e-02
   6.9010000e-02
   6.8900000e-02
   6.4100000e-02
   4.8090000e-02
   1.3270000e-02
   4.2940000e-02
   2.1410000e-02
  -2.4400000e-03
   3.6380000e-02
  -5.0180000e-02
  -2.1390000e-02
  -4.1510000e-02
  -9.1030000e-02
  -3.4460000e-02
  -1.3509000e-01
  -3.3420000e-02
  -9.9230000e-02
  -1.3216000e-01
  -6.0590000e-02
  -1.4178000e-01
  -7.7810000e-02
  -1.1584000e-01
  -1.1697000e-01
  -5.7330000e-02
  -1.1228000e-01
  -3.1910000e-02
  -1.0712000e-01
   2.8200000e-03
  -1.0690000e-02
  -3.9020000e-02
   4.2140000e-02
  -2.8410000e-02
   6.1220000e-02
   2.8620000e-02
   1.5350000e-02
   4.7240000e-02
   4.3160000e-02
   9.6680000e-02
   6.1910000e-02
   7.3650000e-02
   9.9340000e-02
   1.0476000e-01
   6.9700000e-02
   1.1875000e-01
   9.2890000e-02
   9.9060000e-02
   8.8830000e-02
   9.0370000e-02
   7.0270000e-02
   2.1470000e-02
   6.1720000e-02
   2.4920000e-02
  -1.1100000e-02
  -2.3360000e-02
   1.5100000e-03
  -7.3340000e-02
  -5.9390000e-02
  -7.5430000e-02
  -9.5880000e-02
  -9.7250000e-02
  -1.2006000e-01
  -8.7930000e-02
  -1.4504000e-01
  -1.0008000e-01
  -8.7900000e-02
  -1.3131000e-01
  -7.5070000e-02
  -9.7470000e-02
  -8.5790000e-02
  -7.0570000e-02
  -7.2520000e-02
  -2.0020000e-02
  -4.2800000e-02
  -2.0870000e-02
  -6.4400000e-03
  -2.4900000e-02
   3.6440000e-02
   2.0800000e-03
   5.4750000e-02
   6.0760000e-02
   5.2700000e-02
   1.1071000e-01
   1.1203000e-01
   1.2335000e-01
   9.2540000e-02
   1.1524000e-01
   1.1066000e-01
   9.0750000e-02
   1.0079000e-01
   8.4390000e-02
   6.4100000e-02
   5.8950000e-02
   4.6420000e-02
   2.8490000e-02
   9.6200000e-03
  -4.3000000e-03
   1.5850000e-02
  -4.2470000e-02
  -2.6620000e-02
  -2.0260000e-02
  -3.9650000e-02
  -5.7550000e-02
  -6.2100000e-02
  -4.4360000e-02
  -8.3020000e-02
  -9.3720000e-02
  -9.2540000e-02
  -9.7360000e-02
  -8.6830000e-02
  -1.1077000e-01
  -1.1864000e-01
  -1.1620000e-01
  -6.2710000e-02
  -1.0161000e-01
  -1.0095000e-01
  -6.0700000e-02
  -6.5860000e-02
  -1.8920000e-02
  -1.9770000e-02
  -2.1030000e-02
   2.1330000e-02
   4.8580000e-02
   5.8460000e-02
   4.2530000e-02
   6.2240000e-02
   9.1910000e-02
   7.6060000e-02
   8.6010000e-02
   8.2800000e-02
   8.8200000e-02
   1.0046000e-01
   5.9630000e-02
   1.1006000e-01
   6.8190000e-02
   8.9790000e-02
   6.3560000e-02
   6.5940000e-02
   5.9720000e-02
   3.3480000e-02
   4.7520000e-02
   9.0000000e-04
   1.7990000e-02
  -9.3200000e-03
  -1.5380000e-02
  -1.1160000e-02
  -7.4300000e-02
  -1.7880000e-02
  -6.2160000e-02
  -8.5110000e-02
  -4.6120000e-02
  -1.2497000e-01
  -6.8350000e-02
  -1.3561000e-01
  -8.9030000e-02
  -1.0364000e-01
  -1.2996000e-01
  -1.1902000e-01
  -1.1732000e-01
  -9.2120000e-02
  -1.0073000e-01
  -4.1920000e-02
  -5.6780000e-02
  -2.5470000e-02
  -2.5000000e-03
   3.0400000e-03
  -1.2600000e-03
   4.9740000e-02
   5.6180000e-02
   3.6520000e-02
   7.4170000e-02
   9.3030000e-02
   1.0260000e-01
   2.9910000e-02
   1.0002000e-01
   1.0416000e-01
   6.8330000e-02
   7.7890000e-02
   8.1760000e-02
   7.6850000e-02
   7.3340000e-02
   5.4670000e-02
   5.9250000e-02
   4.6780000e-02
   5.4010000e-02
   1.1190000e-02
   2.8410000e-02
   2.3550000e-02
  -5.4000000e-03
  -1.1410000e-02
  -3.8410000e-02
  -4.0000000e-02
  -3.9510000e-02
  -5.0610000e-02
  -8.9030000e-02
  -1.0030000e-01
  -9.9170000e-02
  -8.9880000e-02
  -1.1927000e-01
  -1.2829000e-01
  -1.1453000e-01
  -1.1137000e-01
  -1.2086000e-01
  -6.1770000e-02
  -9.8100000e-02
  -4.4970000e-02
  -2.2290000e-02
  -6.0480000e-02
   6.6400000e-03
  -5.1410000e-02
   3.5840000e-02
   8.3400000e-03
   1.7900000e-02
   5.7300000e-02
   3.1280000e-02
   5.6400000e-02
   6.0650000e-02
   8.0970000e-02
   6.4240000e-02
   7.9160000e-02
   9.6730000e-02
   1.0224000e-01
   6.4870000e-02
   1.2017000e-01
   7.3970000e-02
   9.4320000e-02
   7.8390000e-02
   7.3950000e-02
   2.9750000e-02
   5.8370000e-02
   6.7280000e-02
   2.1100000e-03
   3.7950000e-02
  -4.3050000e-02
   3.4600000e-02
  -4.4860000e-02
  -5.9390000e-02
  -5.1770000e-02
  -1.1853000e-01
  -4.0990000e-02
  -1.4331000e-01
  -1.1110000e-01
  -1.1850000e-01
  -1.3975000e-01
  -8.0970000e-02
  -1.3690000e-01
  -8.6610000e-02
  -1.2100000e-01
  -8.0610000e-02
  -7.0710000e-02
  -9.1520000e-02
  -3.9950000e-02
  -7.6720000e-02
   1.4640000e-02
  -1.6860000e-02
  -1.8750000e-02
   6.3090000e-02
  -9.7100000e-03
   8.7190000e-02
   4.1980000e-02
   6.6160000e-02
   1.1847000e-01
   4.4580000e-02
   1.5000000e-01
   3.7210000e-02
   1.2371000e-01
   9.6020000e-02
   7.0250000e-02
   1.1787000e-01
   6.7370000e-02
   1.0082000e-01
   7.4440000e-02
   9.2840000e-02
   6.1880000e-02
   5.4510000e-02
   9.6000000e-03
   3.9890000e-02
  -3.6770000e-02
  -1.2640000e-02
  -4.8640000e-02
  -7.0680000e-02
  -7.1200000e-02
  -8.1510000e-02
  -6.8440000e-02
  -1.1675000e-01
  -9.8900000e-02
  -8.8230000e-02
  -1.0649000e-01
  -9.9880000e-02
  -1.2267000e-01
  -9.2040000e-02
  -1.0529000e-01
  -1.0364000e-01
  -7.5810000e-02
  -9.7140000e-02
  -5.7170000e-02
  -7.6800000e-02
  -8.5800000e-03
  -4.6890000e-02
  -5.0200000e-03
   2.6380000e-02
   1.8920000e-02
   7.6440000e-02
  -2.4570000e-02
   1.2429000e-01
   6.3390000e-02
   8.4450000e-02
   1.1250000e-01
   5.3330000e-02
   1.3440000e-01
   6.8930000e-02
   9.8180000e-02
   7.9350000e-02
   8.9080000e-02
   8.3270000e-02
   6.2510000e-02
   8.5330000e-02
   6.8050000e-02
   4.7980000e-02
   2.4180000e-02
   1.6920000e-02
  -4.8000000e-03
  -7.1800000e-03
  -5.5400000e-03
  -5.0340000e-02
  -3.3640000e-02
  -6.1830000e-02
  -5.4890000e-02
  -7.5510000e-02
  -7.1100000e-02
  -8.9490000e-02
  -1.1549000e-01
  -8.8780000e-02
  -1.1699000e-01
  -1.2297000e-01
  -1.1299000e-01
  -8.4450000e-02
  -7.7480000e-02
  -1.2259000e-01
  -6.7500000e-02
  -5.7820000e-02
  -6.3910000e-02
  -1.9700000e-03
  -2.6790000e-02
  -1.7380000e-02
  -4.3900000e-03
   5.9550000e-02
   2.0700000e-02
   3.7210000e-02
   6.9010000e-02
   7.1620000e-02
   6.6270000e-02
   5.7300000e-02
   1.1894000e-01
   8.3840000e-02
   9.3220000e-02
   1.1751000e-01
   8.1240000e-02
   8.4280000e-02
   9.2590000e-02
   5.9280000e-02
   5.6340000e-02
   5.3990000e-02
   5.9110000e-02
   3.9510000e-02
   4.8610000e-02
   1.2720000e-02
   1.7490000e-02
   8.2000000e-03
  -1.3900000e-02
  -4.3540000e-02
  -6.5280000e-02
  -6.1170000e-02
  -8.4010000e-02
  -6.7890000e-02
  -8.4310000e-02
  -1.3547000e-01
  -9.7770000e-02
  -1.0084000e-01
  -1.2102000e-01
  -1.2080000e-01
  -8.0230000e-02
  -1.0838000e-01
  -1.2338000e-01
  -8.1380000e-02
  -7.5020000e-02
  -5.3470000e-02
  -9.8790000e-02
  -2.0070000e-02
  -4.9400000e-03
  -3.2630000e-02
   4.2390000e-02
   4.9520000e-02
   7.7920000e-02
   6.5170000e-02
   9.5940000e-02
   9.7360000e-02
   8.0690000e-02
   1.4277000e-01
   8.2420000e-02
   8.0280000e-02
   7.8660000e-02
   1.0937000e-01
   5.8240000e-02
   7.0350000e-02
   7.1860000e-02
   1.0293000e-01
   5.1270000e-02
   7.5480000e-02
   4.3400000e-02
   3.4790000e-02
   3.3090000e-02
   3.1830000e-02
  -9.1900000e-03
  -4.5950000e-02
  -1.4970000e-02
  -7.1200000e-02
  -5.0560000e-02
  -7.5700000e-02
  -1.2972000e-01
  -1.0882000e-01
  -1.2804000e-01
  -1.0051000e-01
  -1.5398000e-01
  -1.4000000e-01
  -1.3270000e-01
  -1.1532000e-01
  -1.3347000e-01
  -6.1500000e-02
  -1.0786000e-01
  -4.6140000e-02
  -7.9200000e-03
  -6.4430000e-02
   2.6870000e-02
  -2.4210000e-02
   5.5600000e-02
   7.2100000e-03
   2.3030000e-02
   7.8690000e-02
   1.7490000e-02
   7.3510000e-02
   7.4500000e-02
   6.2290000e-02
   1.0274000e-01
   8.0390000e-02
   1.2749000e-01
   6.9780000e-02
   1.0841000e-01
   1.3062000e-01
   7.7540000e-02
   1.1113000e-01
   6.4100000e-02
   1.0153000e-01
   5.3110000e-02
   4.8230000e-02
   3.4460000e-02
   8.1700000e-03
  -1.7740000e-02
  -2.1190000e-02
  -1.8840000e-02
  -6.8600000e-02
  -5.1980000e-02
  -1.2892000e-01
  -5.9660000e-02
  -1.2431000e-01
  -9.9420000e-02
  -1.2470000e-01
  -1.5650000e-01
  -9.0510000e-02
  -1.1982000e-01
  -1.3912000e-01
  -1.1329000e-01
  -1.0361000e-01
  -6.1330000e-02
  -8.3820000e-02
  -8.0090000e-02
  -6.5500000e-02
  -6.2460000e-02
   1.4120000e-02
  -1.8230000e-02
   1.5490000e-02
   2.8240000e-02
   6.2680000e-02
   8.0640000e-02
   3.5510000e-02
   1.0504000e-01
   9.6730000e-02
   9.0670000e-02
   9.2890000e-02
   8.9490000e-02
   1.1209000e-01
   9.4780000e-02
   7.1810000e-02
   1.0784000e-01
   6.7940000e-02
   1.2311000e-01
   7.1010000e-02
   7.9490000e-02
   6.4210000e-02
   4.0410000e-02
   4.0170000e-02
  -9.9500000e-03
   1.9500000e-03
  -5.7720000e-02
  -4.9190000e-02
  -7.1450000e-02
  -6.5610000e-02
  -1.1601000e-01
  -9.3910000e-02
  -1.1033000e-01
  -1.0978000e-01
  -1.2966000e-01
  -1.2001000e-01
  -1.3205000e-01
  -1.1793000e-01
  -9.8650000e-02
  -1.0030000e-01
  -9.0290000e-02
  -9.0260000e-02
  -5.8730000e-02
  -7.1200000e-02
  -3.7560000e-02
  -2.6070000e-02
  -4.6100000e-03
   1.0040000e-02
   1.5820000e-02
   3.2960000e-02
   1.1540000e-02
   1.0208000e-01
   5.8540000e-02
   8.8780000e-02
   8.4890000e-02
   1.0984000e-01
   1.0413000e-01
   1.1041000e-01
   1.1124000e-01
   1.0775000e-01
   9.5000000e-02
   9.5200000e-02
   8.3600000e-02
   6.0180000e-02
   5.5360000e-02
   5.9990000e-02
   2.2370000e-02
   1.4230000e-02
  -2.9900000e-03
   2.7140000e-02
  -2.9900000e-03
  -8.5000000e-04
  -5.5220000e-02
  -2.9260000e-02
  -5.2590000e-02
  -8.2420000e-02
  -7.4520000e-02
  -8.2170000e-02
  -1.2662000e-01
  -1.1228000e-01
  -1.1699000e-01
  -1.4504000e-01
  -1.1340000e-01
  -1.3078000e-01
  -1.2626000e-01
  -1.1379000e-01
  -1.0871000e-01
  -5.4340000e-02
  -6.8270000e-02
  -3.5150000e-02
  -2.7230000e-02
   1.3600000e-02
   1.4560000e-02
   1.2610000e-02
   7.7100000e-02
   2.1030000e-02
   7.2710000e-02
   7.7020000e-02
   9.2890000e-02
   1.0814000e-01
   5.7990000e-02
   1.1294000e-01
   9.7280000e-02
   1.1154000e-01
   8.8530000e-02
   8.1080000e-02
   9.8100000e-02
   9.4370000e-02
   5.1330000e-02
   6.8380000e-02
   7.6200000e-02
   2.6790000e-02
   3.0680000e-02
   4.2140000e-02
   1.3430000e-02
  -3.3420000e-02
  -1.1500000e-03
  -6.0350000e-02
  -3.0460000e-02
  -8.2040000e-02
  -9.6350000e-02
  -4.3650000e-02
  -1.0682000e-01
  -8.4720000e-02
  -1.3076000e-01
  -1.2936000e-01
  -9.2260000e-02
  -1.4926000e-01
  -1.2906000e-01
  -1.1453000e-01
  -1.1494000e-01
  -9.4240000e-02
  -9.1820000e-02
  -6.2270000e-02
  -5.8650000e-02
  -3.8190000e-02
   2.6400000e-02
  -1.7600000e-02
   4.6640000e-02
   6.7500000e-02
   5.7800000e-02
   8.1020000e-02
   3.8800000e-02
   1.6944000e-01
   4.6420000e-02
   1.0723000e-01
   9.9060000e-02
   9.4950000e-02
   1.0350000e-01
   5.7500000e-02
   1.1765000e-01
   7.5180000e-02
   7.3230000e-02
   8.5000000e-02
   6.4350000e-02
   7.8800000e-02
   5.1240000e-02
   6.5280000e-02
   3.1670000e-02
   2.1960000e-02
   2.0180000e-02
  -4.1350000e-02
  -2.5660000e-02
  -8.4370000e-02
  -4.5460000e-02
  -1.0899000e-01
  -1.0663000e-01
  -1.1812000e-01
  -1.3972000e-01
  -1.3221000e-01
  -1.3630000e-01
  -1.3728000e-01
  -1.2440000e-01
  -9.9880000e-02
  -8.0530000e-02
  -7.7620000e-02
  -8.8620000e-02
  -5.9220000e-02
  -4.0300000e-02
  -2.9500000e-02
  -1.8040000e-02
  -2.2100000e-02
   3.3720000e-02
   3.3720000e-02
   1.0780000e-02
   2.8190000e-02
   5.5520000e-02
   6.5470000e-02
   6.6740000e-02
   8.9770000e-02
   1.0161000e-01
   1.2303000e-01
   5.6150000e-02
   1.3860000e-01
   1.0490000e-01
   8.8040000e-02
   1.2322000e-01
   7.2160000e-02
   1.3218000e-01
   3.8140000e-02
   9.0810000e-02
   4.3240000e-02
   3.5860000e-02
   2.8760000e-02
  -9.7900000e-03
   1.2800000e-02
  -3.0960000e-02
  -4.9570000e-02
  -5.5910000e-02
  -8.2280000e-02
  -1.0663000e-01
  -8.3210000e-02
  -1.5365000e-01
  -1.1420000e-01
  -1.1941000e-01
  -1.4490000e-01
  -1.1365000e-01
  -1.4847000e-01
  -1.1675000e-01
  -9.2430000e-02
  -9.7060000e-02
  -7.2190000e-02
  -7.5070000e-02
  -3.5420000e-02
  -1.5600000e-02
  -4.7460000e-02
   2.3520000e-02
  -5.2810000e-02
   6.3690000e-02
   3.2630000e-02
   4.5350000e-02
   1.0677000e-01
   4.2200000e-02
   1.4416000e-01
   6.7090000e-02
   1.2963000e-01
   8.3460000e-02
   8.8010000e-02
   1.4869000e-01
   9.2730000e-02
   1.1743000e-01
   7.7370000e-02
   1.2105000e-01
   8.7460000e-02
   5.5580000e-02
   5.3470000e-02
   3.9730000e-02
   4.3460000e-02
   1.1130000e-02
  -1.8780000e-02
  -6.5500000e-03
  -6.2600000e-02
  -4.0360000e-02
  -6.4980000e-02
  -9.6870000e-02
  -8.7190000e-02
  -9.1140000e-02
  -1.1189000e-01
  -1.1425000e-01
  -1.0169000e-01
  -1.3018000e-01
  -1.3613000e-01
  -1.1162000e-01
  -1.1162000e-01
  -1.1869000e-01
  -1.1214000e-01
  -5.1520000e-02
  -8.7050000e-02
  -6.9780000e-02
  -3.2300000e-02
  -1.9410000e-02
  -2.3600000e-03
   4.1000000e-04
   4.2940000e-02
   4.7240000e-02
   7.5840000e-02
   8.7680000e-02
   8.2720000e-02
   1.2179000e-01
   9.3110000e-02
   1.3498000e-01
   9.8980000e-02
   9.6050000e-02
   1.1735000e-01
   8.9440000e-02
   8.3100000e-02
   9.4650000e-02
   6.5800000e-02
   9.0890000e-02
   4.6890000e-02
   4.3320000e-02
   4.7460000e-02
   3.0000000e-04
   1.9500000e-03
   8.4700000e-03
  -5.6800000e-03
  -4.8450000e-02
  -5.8240000e-02
  -3.7510000e-02
  -7.2440000e-02
  -8.5430000e-02
  -8.9080000e-02
  -1.1823000e-01
  -8.9630000e-02
  -1.2050000e-01
  -1.2423000e-01
  -1.4279000e-01
  -1.3177000e-01
  -9.8540000e-02
  -1.2316000e-01
  -1.2500000e-01
  -9.8540000e-02
  -4.6670000e-02
  -7.4500000e-02
  -2.7700000e-03
  -3.9260000e-02
   1.8730000e-02
   8.0300000e-03
   4.2140000e-02
   5.9390000e-02
   3.4770000e-02
   1.0375000e-01
   6.9040000e-02
   1.3874000e-01
   4.8310000e-02
   1.2555000e-01
   1.1080000e-01
   6.4540000e-02
   1.4762000e-01
   3.9320000e-02
   1.7073000e-01
   4.6360000e-02
   9.5310000e-02
   1.1294000e-01
   2.9230000e-02
   1.1392000e-01
  -2.5550000e-02
   8.1240000e-02
  -4.0900000e-03
  -2.3520000e-02
   2.7560000e-02
  -6.5690000e-02
  -1.2610000e-02
  -7.8420000e-02
  -1.0367000e-01
  -5.3740000e-02
  -1.8485000e-01
  -9.6180000e-02
  -1.5291000e-01
  -1.1261000e-01
  -1.2590000e-01
  -1.5746000e-01
  -7.9650000e-02
  -1.4066000e-01
  -7.5040000e-02
  -8.7460000e-02
  -7.7620000e-02
  -7.5810000e-02
  -4.2110000e-02
   2.3900000e-03
  -5.2310000e-02
  -6.9400000e-03
   3.6360000e-02
  -1.9200000e-03
   4.5320000e-02
   3.3040000e-02
   7.4580000e-02
   7.3150000e-02
   7.1230000e-02
   1.1664000e-01
   8.7160000e-02
   1.2053000e-01
   1.3846000e-01
   1.1691000e-01
   1.2267000e-01
   1.0866000e-01
   1.2689000e-01
   9.3990000e-02
   9.8980000e-02
   5.9910000e-02
   3.6270000e-02
   4.2830000e-02
   2.4130000e-02
   1.7300000e-03
  -1.0060000e-02
  -4.3700000e-02
  -5.1220000e-02
  -4.2880000e-02
  -8.8510000e-02
  -7.1100000e-02
  -9.5610000e-02
  -8.7050000e-02
  -9.5470000e-02
  -1.2708000e-01
  -9.6290000e-02
  -1.4589000e-01
  -1.2475000e-01
  -1.2684000e-01
  -1.3007000e-01
  -1.3621000e-01
  -1.0797000e-01
  -7.5070000e-02
  -1.1244000e-01
  -4.9490000e-02
  -6.2730000e-02
  -1.5660000e-02
  -2.8160000e-02
   1.9820000e-02
   1.1730000e-02
   2.9310000e-02
   9.8900000e-02
   5.0120000e-02
   9.0620000e-02
   7.6990000e-02
   1.0216000e-01
   1.0723000e-01
   7.1530000e-02
   9.9580000e-02
   1.0838000e-01
   9.5000000e-02
   8.4890000e-02
   6.8740000e-02
   7.5950000e-02
   7.0440000e-02
   3.3640000e-02
   6.5860000e-02
   2.2920000e-02
   2.6950000e-02
  -1.5600000e-03
  -3.4800000e-03
  -4.8670000e-02
  -5.7930000e-02
  -4.0550000e-02
  -1.0690000e-01
  -7.9050000e-02
  -1.1754000e-01
  -9.6700000e-02
  -1.0822000e-01
  -1.4022000e-01
  -1.3054000e-01
  -1.5020000e-01
  -1.5645000e-01
  -1.4151000e-01
  -1.4208000e-01
  -1.4754000e-01
  -1.1603000e-01
  -8.8400000e-02
  -1.0243000e-01
  -7.8740000e-02
  -5.0940000e-02
  -3.7210000e-02
  -8.8000000e-04
  -3.4710000e-02
   7.1750000e-02
   2.2290000e-02
   9.8100000e-02
   9.3930000e-02
   8.6070000e-02
   9.6100000e-02
   1.0411000e-01
   1.1348000e-01
   9.5580000e-02
   1.0411000e-01
   9.2730000e-02
   8.9790000e-02
   7.5700000e-02
   9.9360000e-02
   6.2100000e-02
   5.5000000e-02
   5.7880000e-02
   2.4510000e-02
   1.8860000e-02
   4.0220000e-02
  -1.4970000e-02
  -1.0780000e-02
  -2.6380000e-02
  -5.9060000e-02
  -3.7730000e-02
  -8.2390000e-02
  -9.2760000e-02
  -1.3347000e-01
  -1.3662000e-01
  -1.2856000e-01
  -1.3808000e-01
  -2.0174000e-01
  -1.3753000e-01
  -1.5116000e-01
  -1.3706000e-01
  -1.5955000e-01
  -1.3783000e-01
  -9.5310000e-02
  -1.0246000e-01
  -7.2960000e-02
  -3.8080000e-02
  -2.9090000e-02
  -1.0360000e-02
  -3.6700000e-03
   4.4880000e-02
   3.6470000e-02
   8.1870000e-02
   6.3090000e-02
   7.9590000e-02
   8.3380000e-02
   9.3880000e-02
   8.8700000e-02
   9.4540000e-02
   6.7230000e-02
   9.6100000e-02
   1.0627000e-01
   6.9310000e-02
   8.9270000e-02
   6.1530000e-02
   7.4470000e-02
   6.3120000e-02
   5.9550000e-02
   7.0880000e-02
   2.8240000e-02
   5.2230000e-02
   2.1140000e-02
  -2.9260000e-02
   1.6620000e-02
  -1.0767000e-01
  -3.2000000e-02
  -9.1880000e-02
  -1.1883000e-01
  -1.3893000e-01
  -1.6667000e-01
  -1.0306000e-01
  -1.7890000e-01
  -1.3520000e-01
  -1.6374000e-01
  -1.2415000e-01
  -1.2253000e-01
  -1.2437000e-01
  -8.8860000e-02
  -9.1960000e-02
  -4.3070000e-02
  -4.6670000e-02
  -3.5370000e-02
  -2.4020000e-02
   3.4190000e-02
   2.1610000e-02
   1.5880000e-02
   4.4170000e-02
   7.6060000e-02
   5.9110000e-02
   8.1710000e-02
   1.0024000e-01
   9.0450000e-02
   1.2289000e-01
   8.6310000e-02
   1.3506000e-01
   1.1472000e-01
   8.9410000e-02
   1.3545000e-01
   1.1321000e-01
   9.1660000e-02
   9.4240000e-02
   8.4280000e-02
   1.3923000e-01
   1.3380000e-02
   3.1420000e-02
   7.0250000e-02
  -5.0230000e-02
   3.4140000e-02
  -9.1550000e-02
  -5.7030000e-02
  -5.1160000e-02
  -1.3405000e-01
  -6.1060000e-02
  -1.4532000e-01
  -1.2544000e-01
  -1.0169000e-01
  -1.5892000e-01
  -1.4633000e-01
  -1.3726000e-01
  -1.1041000e-01
  -1.0520000e-01
  -1.3098000e-01
  -7.2990000e-02
  -9.3060000e-02
  -6.0620000e-02
  -6.0100000e-02
  -2.8980000e-02
  -3.7300000e-03
  -8.8000000e-03
   1.9080000e-02
  -4.6300000e-03
   5.9060000e-02
   5.7220000e-02
   7.7400000e-02
   5.4150000e-02
   1.3018000e-01
   1.1214000e-01
   1.1365000e-01
   1.0943000e-01
   1.3312000e-01
   1.3649000e-01
   1.0013000e-01
   1.4789000e-01
   1.2547000e-01
   1.1724000e-01
   1.0246000e-01
   8.1730000e-02
   7.9430000e-02
   4.3790000e-02
   5.1960000e-02
  -5.6500000e-03
  -8.4200000e-03
  -5.6200000e-03
  -8.7300000e-02
  -5.3850000e-02
  -8.5460000e-02
  -7.1420000e-02
  -1.0326000e-01
  -1.3057000e-01
  -9.2070000e-02
  -1.1735000e-01
  -1.2034000e-01
  -1.1587000e-01
  -1.3139000e-01
  -1.1954000e-01
  -1.1159000e-01
  -1.4891000e-01
  -1.1304000e-01
  -8.4530000e-02
  -8.3980000e-02
  -8.3710000e-02
  -6.2870000e-02
  -2.4130000e-02
   2.2800000e-03
   1.8600000e-03
   3.7150000e-02
   6.1360000e-02
   8.0140000e-02
   9.9720000e-02
   1.0150000e-01
   1.0002000e-01
   1.0564000e-01
   1.3194000e-01
   1.3536000e-01
   1.2675000e-01
   1.3775000e-01
   1.0885000e-01
   1.4863000e-01
   1.0027000e-01
   9.7660000e-02
   9.2620000e-02
   4.1070000e-02
   9.3580000e-02
   3.7730000e-02
   3.3940000e-02
   1.2040000e-02
  -5.3200000e-03
   1.2860000e-02
  -3.8220000e-02
  -5.4920000e-02
  -5.8180000e-02
  -5.1240000e-02
  -8.2910000e-02
  -1.2782000e-01
  -1.0833000e-01
  -1.2204000e-01
  -1.4715000e-01
  -1.6380000e-01
  -1.5930000e-01
  -1.4093000e-01
  -1.6939000e-01
  -1.1883000e-01
  -1.3344000e-01
  -1.0301000e-01
  -8.1160000e-02
  -6.2270000e-02
  -3.8740000e-02
  -2.7390000e-02
  -2.3600000e-03
   1.6750000e-02
   4.7730000e-02
   6.8410000e-02
   7.5260000e-02
   8.4780000e-02
   1.4743000e-01
   1.0062000e-01
   1.2963000e-01
   1.2105000e-01
   1.4490000e-01
   9.7610000e-02
   1.2815000e-01
   1.0350000e-01
   1.0773000e-01
   9.7880000e-02
   1.1324000e-01
   8.9080000e-02
   3.8990000e-02
   1.0054000e-01
   2.6620000e-02
   7.4500000e-02
  -3.7800000e-03
   1.7770000e-02
   9.3800000e-03
  -1.9910000e-02
  -3.1640000e-02
  -6.9560000e-02
  -4.4230000e-02
  -9.7030000e-02
  -1.4131000e-01
  -1.3517000e-01
  -1.4112000e-01
  -1.4381000e-01
  -1.7062000e-01
  -1.7457000e-01
  -1.6119000e-01
  -1.5118000e-01
  -1.5184000e-01
  -1.5096000e-01
  -9.9010000e-02
  -9.2450000e-02
  -6.0810000e-02
  -2.6400000e-02
  -3.2460000e-02
   2.7120000e-02
   2.0920000e-02
   6.7040000e-02
   6.7340000e-02
   9.6790000e-02
   9.5330000e-02
   1.2231000e-01
   1.3597000e-01
   1.1025000e-01
   1.4011000e-01
   1.0145000e-01
   1.2999000e-01
   1.2333000e-01
   1.3687000e-01
   9.4650000e-02
   1.2116000e-01
   1.3057000e-01
   8.3840000e-02
   7.7510000e-02
   7.5320000e-02
   7.8660000e-02
  -4.2500000e-03
   6.6900000e-03
   2.2240000e-02
  -5.3520000e-02
  -2.7120000e-02
  -8.8750000e-02
  -8.0500000e-02
  -1.1124000e-01
  -1.0882000e-01
  -1.4148000e-01
  -1.5988000e-01
  -1.5656000e-01
  -1.4578000e-01
  -1.4699000e-01
  -1.7602000e-01
  -1.6020000e-01
  -1.1540000e-01
  -1.2919000e-01
  -1.0904000e-01
  -6.7860000e-02
  -6.8440000e-02
  -5.2040000e-02
   1.9220000e-02
  -2.6000000e-03
   3.2930000e-02
   4.7680000e-02
   8.0910000e-02
   7.9760000e-02
   5.3050000e-02
   1.0923000e-01
   1.0929000e-01
   1.0221000e-01
   1.4044000e-01
   1.0158000e-01
   8.7270000e-02
   1.3742000e-01
   1.3451000e-01
   9.3550000e-02
   1.0202000e-01
   1.2333000e-01
   1.1346000e-01
   7.6060000e-02
   6.5040000e-02
   9.5990000e-02
   4.3840000e-02
   1.1270000e-02
   2.4570000e-02
  -4.8480000e-02
   1.5400000e-03
  -7.7180000e-02
  -6.3340000e-02
  -8.2230000e-02
  -1.3246000e-01
  -6.9480000e-02
  -1.5823000e-01
  -1.3857000e-01
  -1.3906000e-01
  -1.3983000e-01
  -1.1976000e-01
  -1.4578000e-01
  -1.1708000e-01
  -1.2947000e-01
  -1.0860000e-01
  -9.3630000e-02
  -7.8720000e-02
  -9.1190000e-02
  -5.3550000e-02
  -3.5530000e-02
  -1.2010000e-02
  -1.2300000e-03
  -9.0000000e-04
   9.8950000e-02
   4.1890000e-02
   9.2020000e-02
   1.0970000e-01
   8.7460000e-02
   1.4485000e-01
   9.9250000e-02
   1.3139000e-01
   1.1008000e-01
   1.4244000e-01
   1.1453000e-01
   9.9750000e-02
   9.5940000e-02
   1.1266000e-01
   1.0869000e-01
   5.2640000e-02
   6.1770000e-02
   9.2260000e-02
   4.2720000e-02
   8.8800000e-03
   3.4050000e-02
  -2.4210000e-02
  -1.0250000e-02
  -7.4930000e-02
  -3.0490000e-02
  -7.5650000e-02
  -1.2536000e-01
  -6.6320000e-02
  -1.3125000e-01
  -1.2991000e-01
  -1.3931000e-01
  -1.3843000e-01
  -1.6092000e-01
  -1.6166000e-01
  -1.3676000e-01
  -1.2884000e-01
  -1.6037000e-01
  -1.1239000e-01
  -9.0510000e-02
  -7.2330000e-02
  -5.4040000e-02
  -3.3230000e-02
   1.9630000e-02
  -1.0170000e-02
   3.5530000e-02
   2.3990000e-02
   7.7150000e-02
   7.8580000e-02
   7.3400000e-02
   1.1411000e-01
   1.0364000e-01
   1.2037000e-01
   1.1839000e-01
   1.2171000e-01
   1.3893000e-01
   1.2939000e-01
   1.1990000e-01
   1.3059000e-01
   1.0940000e-01
   8.7220000e-02
   8.6150000e-02
   7.2220000e-02
   6.8600000e-02
   2.0450000e-02
   4.2770000e-02
   1.9270000e-02
   8.2000000e-04
   8.4200000e-03
  -7.2550000e-02
  -3.5150000e-02
  -9.4950000e-02
  -8.3840000e-02
  -8.3300000e-02
  -1.5025000e-01
  -1.2398000e-01
  -1.6116000e-01
  -1.5938000e-01
  -1.7098000e-01
  -1.8181000e-01
  -1.7523000e-01
  -1.5365000e-01
  -1.2382000e-01
  -1.3668000e-01
  -9.0780000e-02
  -5.8780000e-02
  -4.6280000e-02
  -3.4520000e-02
  -1.6450000e-02
   1.2530000e-02
   1.2450000e-02
   5.9060000e-02
   6.5230000e-02
   8.6120000e-02
   6.7120000e-02
   1.3942000e-01
   1.2390000e-01
   1.0391000e-01
   1.4307000e-01
   1.6319000e-01
   1.1406000e-01
   1.4320000e-01
   1.6607000e-01
   1.2566000e-01
   9.7250000e-02
   1.3125000e-01
   1.0630000e-01
   6.7590000e-02
   5.3880000e-02
   4.4580000e-02
   2.4570000e-02
  -1.3790000e-02
  -1.2830000e-02
  -5.5030000e-02
  -4.5600000e-02
  -7.8830000e-02
  -7.4190000e-02
  -1.1998000e-01
  -1.3939000e-01
  -1.2566000e-01
  -1.4518000e-01
  -1.5532000e-01
  -1.9966000e-01
  -1.5165000e-01
  -1.4614000e-01
  -1.7397000e-01
  -1.3377000e-01
  -1.2568000e-01
  -1.1716000e-01
  -7.8990000e-02
  -8.4340000e-02
  -6.9600000e-03
  -4.4470000e-02
   4.9900000e-03
   4.4610000e-02
   1.7190000e-02
   1.1113000e-01
   5.2180000e-02
   1.1856000e-01
   7.9400000e-02
   1.2226000e-01
   1.4282000e-01
   1.1603000e-01
   1.2563000e-01
   1.1699000e-01
   1.6020000e-01
   9.2020000e-02
   1.3421000e-01
   1.0526000e-01
   1.2928000e-01
   8.7240000e-02
   8.6310000e-02
   8.7680000e-02
   4.8090000e-02
   6.5060000e-02
  -1.5960000e-02
   2.7030000e-02
  -2.9530000e-02
  -5.3140000e-02
  -2.0260000e-02
  -1.3791000e-01
  -6.3720000e-02
  -1.1804000e-01
  -1.3679000e-01
  -9.8620000e-02
  -2.0898000e-01
  -1.2659000e-01
  -1.6648000e-01
  -1.6802000e-01
  -1.4005000e-01
  -1.6964000e-01
  -1.1987000e-01
  -1.1620000e-01
  -1.0652000e-01
  -8.4830000e-02
  -9.5200000e-02
  -3.0350000e-02
   2.5000000e-03
  -3.1090000e-02
   2.6380000e-02
   4.0090000e-02
   1.1505000e-01
   6.9400000e-02
   8.6180000e-02
   1.4926000e-01
   9.7220000e-02
   1.1625000e-01
   1.3114000e-01
   1.1680000e-01
   1.2749000e-01
   1.2048000e-01
   1.3397000e-01
   1.0191000e-01
   1.0943000e-01
   1.0600000e-01
   8.5790000e-02
   8.4610000e-02
   6.9120000e-02
   6.1640000e-02
   2.2840000e-02
   2.0070000e-02
   7.7600000e-03
  -2.3610000e-02
  -7.2660000e-02
  -4.5540000e-02
  -7.6520000e-02
  -7.6740000e-02
  -1.4660000e-01
  -1.1579000e-01
  -1.1675000e-01
  -1.6382000e-01
  -1.3750000e-01
  -1.9396000e-01
  -1.6062000e-01
  -1.7682000e-01
  -1.3690000e-01
  -1.4787000e-01
  -1.1669000e-01
  -8.2940000e-02
  -8.7740000e-02
  -5.9580000e-02
  -3.2980000e-02
  -4.4100000e-03
  -1.3220000e-02
   3.0930000e-02
   4.1650000e-02
   6.2460000e-02
   8.4610000e-02
   6.2920000e-02
   1.1521000e-01
   1.0068000e-01
   1.3342000e-01
   1.1143000e-01
   1.5297000e-01
   1.4131000e-01
   1.3229000e-01
   1.1307000e-01
   1.2911000e-01
   1.2360000e-01
   9.0450000e-02
   8.8510000e-02
   7.6140000e-02
   7.8640000e-02
   3.9130000e-02
   2.1360000e-02
   1.8450000e-02
  -8.5000000e-04
  -3.5010000e-02
  -3.3940000e-02
  -8.7770000e-02
  -5.8210000e-02
  -1.0932000e-01
  -9.9610000e-02
  -1.3166000e-01
  -1.5417000e-01
  -9.7420000e-02
  -1.8639000e-01
  -1.3591000e-01
  -1.6476000e-01
  -1.5546000e-01
  -1.3254000e-01
  -1.6352000e-01
  -1.2193000e-01
  -1.4071000e-01
  -8.4060000e-02
  -7.2600000e-02
  -6.7590000e-02
  -3.4740000e-02
  -1.9440000e-02
   2.5060000e-02
   4.0090000e-02
   5.0340000e-02
   9.1990000e-02
   8.4690000e-02
   1.5406000e-01
   9.7090000e-02
   1.3287000e-01
   1.4238000e-01
   1.1724000e-01
   1.6717000e-01
   1.0885000e-01
   1.5044000e-01
   1.3087000e-01
   1.5116000e-01
   1.0685000e-01
   1.0487000e-01
   8.6670000e-02
   1.0682000e-01
   1.9600000e-02
   4.0910000e-02
   2.7000000e-04
  -9.1600000e-03
  -2.2460000e-02
  -7.2490000e-02
  -2.8760000e-02
  -9.4570000e-02
  -1.1732000e-01
  -9.2120000e-02
  -1.4707000e-01
  -1.4126000e-01
  -1.7079000e-01
  -1.5812000e-01
  -1.8090000e-01
  -1.7896000e-01
  -1.6912000e-01
  -1.6062000e-01
  -1.4660000e-01
  -1.4976000e-01
  -1.0646000e-01
  -8.6260000e-02
  -7.2360000e-02
  -1.9490000e-02
  -3.7750000e-02
   2.3390000e-02
   1.3110000e-02
   5.8320000e-02
   5.2810000e-02
   7.6250000e-02
   1.2752000e-01
   9.8730000e-02
   1.2409000e-01
   1.2182000e-01
   1.7013000e-01
   1.3654000e-01
   1.4962000e-01
   1.3443000e-01
   1.6434000e-01
   1.0372000e-01
   1.0803000e-01
   8.2310000e-02
   1.0740000e-01
   8.9030000e-02
   4.0220000e-02
   3.7120000e-02
   3.8550000e-02
   1.7440000e-02
  -2.4160000e-02
  -2.3550000e-02
  -4.2690000e-02
  -4.7100000e-02
  -9.5990000e-02
  -8.9660000e-02
  -9.5090000e-02
  -1.4257000e-01
  -1.1932000e-01
  -1.6689000e-01
  -1.8825000e-01
  -1.7498000e-01
  -1.5924000e-01
  -1.7761000e-01
  -1.9875000e-01
  -1.4904000e-01
  -1.6177000e-01
  -1.1409000e-01
  -1.2667000e-01
  -8.6720000e-02
  -2.6020000e-02
  -4.3650000e-02
   4.2990000e-02
  -2.7000000e-04
   1.0597000e-01
   9.2780000e-02
   1.0405000e-01
   1.3791000e-01
   1.1472000e-01
   1.8411000e-01
   1.2305000e-01
   1.5412000e-01
   1.3399000e-01
   1.1527000e-01
   1.4759000e-01
   1.0008000e-01
   1.3301000e-01
   7.2300000e-02
   1.1845000e-01
   1.0934000e-01
   7.2850000e-02
   7.3320000e-02
   5.7030000e-02
   6.0980000e-02
   1.7490000e-02
  -9.8700000e-03
  -3.0110000e-02
  -4.3680000e-02
  -5.2310000e-02
  -1.2889000e-01
  -9.3910000e-02
  -1.5815000e-01
  -1.5587000e-01
  -1.6262000e-01
  -2.0958000e-01
  -1.6519000e-01
  -1.7175000e-01
  -1.6975000e-01
  -1.9061000e-01
  -1.4570000e-01
  -1.3383000e-01
  -1.1960000e-01
  -9.5170000e-02
  -8.8730000e-02
  -6.9070000e-02
  -1.8560000e-02
  -5.3500000e-03
   7.5400000e-03
   2.5030000e-02
   5.5440000e-02
   1.0493000e-01
   7.1480000e-02
   1.2226000e-01
   1.1856000e-01
   1.4274000e-01
   1.5919000e-01
   1.3767000e-01
   1.1984000e-01
   1.5678000e-01
   1.5398000e-01
   1.4373000e-01
   1.1324000e-01
   1.5132000e-01
   1.1612000e-01
   9.5880000e-02
   8.7030000e-02
   6.7610000e-02
   6.0700000e-02
  -2.2020000e-02
   1.8950000e-02
  -4.6200000e-02
  -3.8910000e-02
  -5.8320000e-02
  -7.8690000e-02
  -7.1260000e-02
  -1.3841000e-01
  -1.4227000e-01
  -1.1000000e-01
  -1.7331000e-01
  -1.6163000e-01
  -1.9371000e-01
  -1.7018000e-01
  -1.8971000e-01
  -1.8919000e-01
  -1.0688000e-01
  -1.8313000e-01
  -1.0435000e-01
  -1.0797000e-01
  -5.7960000e-02
  -4.2640000e-02
  -5.0860000e-02
   3.9510000e-02
   2.1820000e-02
   5.8020000e-02
   6.4570000e-02
   6.9720000e-02
   8.3190000e-02
   8.6150000e-02
   1.2135000e-01
   1.4789000e-01
   9.7060000e-02
   1.5398000e-01
   1.4693000e-01
   1.4118000e-01
   1.2146000e-01
   1.3347000e-01
   1.2335000e-01
   1.2149000e-01
   1.1107000e-01
   1.1283000e-01
   1.0309000e-01
   9.1600000e-02
   5.8810000e-02
   4.1210000e-02
   1.9080000e-02
  -1.6750000e-02
  -3.2790000e-02
  -5.3250000e-02
  -9.9060000e-02
  -1.0082000e-01
  -1.2080000e-01
  -1.2802000e-01
  -1.6827000e-01
  -1.8524000e-01
  -1.7251000e-01
  -1.8688000e-01
  -1.6037000e-01
  -1.8285000e-01
  -1.7369000e-01
  -1.5277000e-01
  -1.1420000e-01
  -1.3062000e-01
  -1.1960000e-01
  -9.3720000e-02
  -4.8780000e-02
  -3.6470000e-02
  -5.0120000e-02
   2.7280000e-02
   1.4670000e-02
   6.9640000e-02
   1.0704000e-01
   6.6490000e-02
   1.4192000e-01
   1.1990000e-01
   1.9571000e-01
   1.4340000e-01
   1.5672000e-01
   1.8861000e-01
   1.6075000e-01
   1.4693000e-01
   1.4131000e-01
   1.4554000e-01
   1.0317000e-01
   1.3306000e-01
   5.6670000e-02
   9.5550000e-02
   5.6480000e-02
   3.8930000e-02
   4.0600000e-03
  -3.3920000e-02
   3.0850000e-02
  -7.4250000e-02
  -4.2690000e-02
  -7.0850000e-02
  -1.1151000e-01
  -1.0079000e-01
  -1.3539000e-01
  -1.4340000e-01
  -1.8513000e-01
  -1.5905000e-01
  -2.0838000e-01
  -1.9089000e-01
  -1.8129000e-01
  -1.9308000e-01
  -1.7745000e-01
  -1.7051000e-01
  -1.1565000e-01
  -1.2947000e-01
  -9.2230000e-02
  -6.3340000e-02
   4.1100000e-03
  -5.3200000e-03
   4.0410000e-02
   6.1660000e-02
   1.0759000e-01
   1.2185000e-01
   1.2936000e-01
   1.4455000e-01
   1.4891000e-01
   1.5711000e-01
   1.5870000e-01
   1.1576000e-01
   1.5055000e-01
   1.3268000e-01
   1.3421000e-01
   1.0844000e-01
   1.3503000e-01
   1.1798000e-01
   9.2540000e-02
   1.1129000e-01
   4.5950000e-02
   5.3440000e-02
   4.8150000e-02
   2.9560000e-02
   1.8600000e-03
  -2.6270000e-02
  -2.0890000e-02
  -5.1300000e-02
  -6.3770000e-02
  -8.0690000e-02
  -1.5031000e-01
  -1.2149000e-01
  -1.3122000e-01
  -1.6563000e-01
  -1.7443000e-01
  -2.0531000e-01
  -1.6462000e-01
  -1.9442000e-01
  -1.9626000e-01
  -1.9407000e-01
  -1.4754000e-01
  -1.2324000e-01
  -1.1930000e-01
  -8.5300000e-02
  -4.6010000e-02
  -3.0240000e-02
   1.0400000e-03
   1.1320000e-02
   5.0830000e-02
   9.6320000e-02
   1.0869000e-01
   9.2320000e-02
   1.2780000e-01
   1.6059000e-01
   1.2867000e-01
   1.5612000e-01
   1.3460000e-01
   1.4992000e-01
   1.4866000e-01
   1.1995000e-01
   1.2478000e-01
   1.0285000e-01
   1.2259000e-01
   1.0282000e-01
   9.3820000e-02
   1.0858000e-01
   9.0670000e-02
   7.4030000e-02
   3.0680000e-02
   2.3880000e-02
   1.7930000e-02
  -3.4770000e-02
  -5.9170000e-02
  -8.7240000e-02
  -1.1195000e-01
  -1.1258000e-01
  -1.7487000e-01
  -1.9091000e-01
  -1.9439000e-01
  -2.1860000e-01
  -2.0975000e-01
  -2.1808000e-01
  -1.9886000e-01
  -1.6892000e-01
  -1.7205000e-01
  -1.3290000e-01
  -1.3227000e-01
  -9.7660000e-02
  -6.2790000e-02
  -3.8880000e-02
  -2.6760000e-02
  -8.0900000e-03
   5.5190000e-02
   7.8330000e-02
   5.1820000e-02
   1.2415000e-01
   1.0422000e-01
   1.2451000e-01
   1.4507000e-01
   1.3662000e-01
   1.3632000e-01
   1.3380000e-01
   1.9121000e-01
   1.4537000e-01
   1.2651000e-01
   1.5872000e-01
   1.4474000e-01
   1.5568000e-01
   1.1650000e-01
   8.6700000e-02
   9.2260000e-02
   8.9160000e-02
   5.8700000e-03
   4.7240000e-02
  -1.9520000e-02
  -1.3680000e-02
  -3.6250000e-02
  -8.4010000e-02
  -6.8570000e-02
  -1.5014000e-01
  -9.2450000e-02
  -1.6599000e-01
  -1.6418000e-01
  -1.9204000e-01
  -1.8422000e-01
  -1.7062000e-01
  -2.4158000e-01
  -1.7835000e-01
  -2.1397000e-01
  -1.5516000e-01
  -1.6325000e-01
  -1.4381000e-01
  -1.0350000e-01
  -8.6830000e-02
   6.3000000e-04
  -4.7160000e-02
  -2.5440000e-02
   4.4990000e-02
   6.8710000e-02
   1.0065000e-01
   7.5450000e-02
   1.4367000e-01
   1.4140000e-01
   1.5996000e-01
   1.5102000e-01
   1.7323000e-01
   1.7284000e-01
   1.4559000e-01
   1.8230000e-01
   1.3561000e-01
   1.6755000e-01
   1.4540000e-01
   1.4153000e-01
   1.3013000e-01
   9.3820000e-02
   9.2560000e-02
   6.9370000e-02
   3.0000000e-02
   3.1200000e-02
  -2.5500000e-02
  -4.3290000e-02
  -5.6260000e-02
  -8.4890000e-02
  -8.1620000e-02
  -1.4707000e-01
  -1.5332000e-01
  -1.4918000e-01
  -1.8754000e-01
  -1.6879000e-01
  -2.2469000e-01
  -1.9108000e-01
  -1.9086000e-01
  -1.9354000e-01
  -1.7317000e-01
  -1.8751000e-01
  -1.1984000e-01
  -1.1570000e-01
  -9.4370000e-02
  -9.1930000e-02
  -4.2530000e-02
   1.2100000e-03
   2.1080000e-02
   2.3140000e-02
   9.5850000e-02
   9.6210000e-02
   1.0501000e-01
   1.1576000e-01
   1.7537000e-01
   1.4795000e-01
   1.6341000e-01
   1.6530000e-01
   1.8247000e-01
   1.5516000e-01
   1.6360000e-01
   1.4682000e-01
   1.4671000e-01
   1.3769000e-01
   1.1299000e-01
   9.4780000e-02
   1.0564000e-01
   7.0880000e-02
   5.0670000e-02
   3.3530000e-02
  -1.6010000e-02
  -3.2400000e-03
  -3.4630000e-02
  -3.5070000e-02
  -5.1930000e-02
  -1.3928000e-01
  -5.2810000e-02
  -1.5162000e-01
  -1.6862000e-01
  -1.6580000e-01
  -2.2118000e-01
  -1.6275000e-01
  -2.3240000e-01
  -1.8071000e-01
  -2.2974000e-01
  -1.6931000e-01
  -1.4241000e-01
  -1.5661000e-01
  -1.1680000e-01
  -1.1129000e-01
  -4.1570000e-02
  -2.7250000e-02
  -1.7490000e-02
   2.3830000e-02
   5.2400000e-02
   7.2740000e-02
   1.1294000e-01
   1.0282000e-01
   1.4416000e-01
   1.2303000e-01
   1.4263000e-01
   1.6977000e-01
   1.2876000e-01
   1.5886000e-01
   1.4647000e-01
   1.5129000e-01
   1.3981000e-01
   1.2604000e-01
   1.3613000e-01
   1.2346000e-01
   1.3369000e-01
   1.0800000e-01
   7.2550000e-02
   1.1069000e-01
   6.1860000e-02
   2.0590000e-02
  -2.8200000e-03
  -2.7420000e-02
  -3.9890000e-02
  -1.0049000e-01
  -1.0005000e-01
  -1.4030000e-01
  -1.7515000e-01
  -1.5190000e-01
  -2.0402000e-01
  -1.9656000e-01
  -2.2036000e-01
  -1.9917000e-01
  -1.8891000e-01
  -2.1800000e-01
  -1.5782000e-01
  -1.6341000e-01
  -1.5393000e-01
  -1.0704000e-01
  -1.0578000e-01
  -5.8150000e-02
  -4.2440000e-02
  -2.5010000e-02
   4.5130000e-02
   3.0850000e-02
   7.6170000e-02
   1.1203000e-01
   1.0844000e-01
   1.4167000e-01
   9.8290000e-02
   1.5420000e-01
   1.6083000e-01
   1.7076000e-01
   1.4521000e-01
   1.6593000e-01
   1.6503000e-01
   1.6089000e-01
   1.6402000e-01
   1.4586000e-01
   1.4301000e-01
   1.4214000e-01
   1.3292000e-01
   5.8350000e-02
   4.8610000e-02
   3.2520000e-02
   1.6180000e-02
  -1.6010000e-02
  -5.5440000e-02
  -5.3000000e-02
  -7.2660000e-02
  -1.1272000e-01
  -1.3857000e-01
  -1.4669000e-01
  -1.7040000e-01
  -1.7655000e-01
  -2.0021000e-01
  -2.1526000e-01
  -2.1701000e-01
  -1.7663000e-01
  -2.3563000e-01
  -2.2025000e-01
  -1.7339000e-01
  -1.4329000e-01
  -8.7600000e-02
  -1.3586000e-01
  -4.9570000e-02
  -1.2690000e-02
   9.8700000e-03
   7.2900000e-03
   2.8680000e-02
   8.7190000e-02
   8.3160000e-02
   1.5170000e-01
   1.2634000e-01
   1.6289000e-01
   1.7271000e-01
   1.5286000e-01
   1.8880000e-01
   1.6317000e-01
   1.7024000e-01
   1.6363000e-01
   1.7386000e-01
   1.3635000e-01
   1.2563000e-01
   1.3545000e-01
   9.9530000e-02
   8.6640000e-02
   6.2380000e-02
   5.8810000e-02
   1.5880000e-02
   1.3430000e-02
  -4.9900000e-03
  -3.5420000e-02
  -6.7910000e-02
  -6.5230000e-02
  -9.6620000e-02
  -1.3432000e-01
  -1.4422000e-01
  -1.6155000e-01
  -1.8614000e-01
  -2.1688000e-01
  -1.9475000e-01
  -2.0602000e-01
  -2.1074000e-01
  -1.7841000e-01
  -1.9714000e-01
  -1.6089000e-01
  -1.6023000e-01
  -1.1050000e-01
  -9.2020000e-02
  -5.5220000e-02
  -3.5750000e-02
  -7.0500000e-03
   2.3110000e-02
   4.4970000e-02
   7.3370000e-02
   1.0265000e-01
   8.3320000e-02
   1.4666000e-01
   1.4490000e-01
   1.5165000e-01
   1.6879000e-01
   1.6026000e-01
   1.6341000e-01
   1.5839000e-01
   1.6840000e-01
   1.5560000e-01
   1.5595000e-01
   1.2590000e-01
   1.4271000e-01
   1.1647000e-01
   1.1614000e-01
   7.6610000e-02
   7.1450000e-02
   5.2070000e-02
   2.2540000e-02
  -6.0900000e-03
  -2.8710000e-02
  -5.8840000e-02
  -7.7840000e-02
  -1.1683000e-01
  -1.4584000e-01
  -1.5450000e-01
  -1.8540000e-01
  -1.5669000e-01
  -2.3039000e-01
  -2.2206000e-01
  -2.0054000e-01
  -2.1869000e-01
  -1.9253000e-01
  -1.8653000e-01
  -1.7334000e-01
  -1.3597000e-01
  -1.4924000e-01
  -7.8530000e-02
  -7.6880000e-02
  -4.7650000e-02
  -2.6270000e-02
   4.4970000e-02
   4.6780000e-02
   5.1110000e-02
   1.2533000e-01
   1.2067000e-01
   1.5705000e-01
   1.2481000e-01
   1.9906000e-01
   1.3270000e-01
   1.7402000e-01
   1.7400000e-01
   1.7194000e-01
   1.5516000e-01
   1.8642000e-01
   1.7131000e-01
   1.1104000e-01
   1.6158000e-01
   1.2996000e-01
   9.5850000e-02
   6.8020000e-02
   9.6810000e-02
   4.4860000e-02
  -1.5600000e-02
  -3.5890000e-02
  -2.9280000e-02
  -9.4870000e-02
  -9.1490000e-02
  -1.2514000e-01
  -1.6319000e-01
  -1.2621000e-01
  -1.8126000e-01
  -1.5746000e-01
  -2.5924000e-01
  -1.8047000e-01
  -2.2996000e-01
  -2.4013000e-01
  -2.1019000e-01
  -2.0788000e-01
  -1.5702000e-01
  -1.6881000e-01
  -1.1732000e-01
  -9.8620000e-02
  -7.4390000e-02
  -2.1820000e-02
   3.2400000e-03
   1.8920000e-02
   7.3860000e-02
   1.1047000e-01
   1.1672000e-01
   1.2185000e-01
   1.7156000e-01
   1.6177000e-01
   1.8258000e-01
   1.6270000e-01
   1.8842000e-01
   1.5085000e-01
   1.6004000e-01
   1.5154000e-01
   1.5157000e-01
   1.5190000e-01
   1.1919000e-01
   1.2911000e-01
   1.0361000e-01
   8.4480000e-02
   7.4330000e-02
   5.7800000e-02
   3.1260000e-02
   1.2610000e-02
  -3.5530000e-02
  -1.5630000e-02
  -4.0850000e-02
  -1.2382000e-01
  -9.0750000e-02
  -1.5804000e-01
  -1.7687000e-01
  -1.6991000e-01
  -2.3678000e-01
  -1.7655000e-01
  -2.7964000e-01
  -1.7808000e-01
  -2.1287000e-01
  -2.3031000e-01
  -1.3698000e-01
  -1.9050000e-01
  -8.2140000e-02
  -1.4458000e-01
  -9.2120000e-02
  -4.4000000e-04
  -8.7680000e-02
   3.3010000e-02
   4.1000000e-04
   2.1740000e-02
   7.9210000e-02
   7.1920000e-02
   1.3443000e-01
   1.1431000e-01
   2.0731000e-01
   1.6360000e-01
   1.9267000e-01
   1.7910000e-01
   2.1309000e-01
   1.6037000e-01
   1.6722000e-01
   1.5464000e-01
   1.5560000e-01
   1.2549000e-01
   1.1428000e-01
   1.2536000e-01
   6.6190000e-02
   9.0400000e-02
   4.9270000e-02
   1.0060000e-02
  -2.9600000e-03
  -6.0900000e-03
  -3.0600000e-02
  -6.4300000e-02
  -8.3650000e-02
  -1.0106000e-01
  -1.5837000e-01
  -1.2193000e-01
  -1.7720000e-01
  -2.0591000e-01
  -2.0745000e-01
  -2.3407000e-01
  -2.0150000e-01
  -2.3341000e-01
  -2.3177000e-01
  -2.2908000e-01
  -1.8713000e-01
  -1.6212000e-01
  -1.4937000e-01
  -8.6530000e-02
  -7.5430000e-02
  -3.2870000e-02
   1.5660000e-02
   2.9090000e-02
   8.9550000e-02
   6.4160000e-02
   1.5804000e-01
   1.1107000e-01
   1.6508000e-01
   2.0251000e-01
   1.3462000e-01
   2.0580000e-01
   1.3852000e-01
   1.9294000e-01
   1.8038000e-01
   1.4713000e-01
   1.8008000e-01
   1.5445000e-01
   1.6964000e-01
   1.2069000e-01
   1.3383000e-01
   1.1052000e-01
   6.2100000e-02
   8.6590000e-02
   2.8490000e-02
  -6.3300000e-03
  -1.8560000e-02
  -5.2730000e-02
  -8.5000000e-02
  -1.1115000e-01
  -1.2434000e-01
  -1.4979000e-01
  -2.0860000e-01
  -1.9448000e-01
  -2.0876000e-01
  -2.3645000e-01
  -2.1159000e-01
  -2.5636000e-01
  -2.1721000e-01
  -2.0572000e-01
  -1.6646000e-01
  -1.5667000e-01
  -1.5099000e-01
  -7.8940000e-02
  -6.8490000e-02
  -4.7930000e-02
  -3.6160000e-02
   1.1570000e-02
   5.6430000e-02
   5.5660000e-02
   1.1313000e-01
   1.0742000e-01
   1.2645000e-01
   1.5209000e-01
   1.6618000e-01
   1.5716000e-01
   1.5968000e-01
   1.9634000e-01
   1.5650000e-01
   1.7984000e-01
   1.6604000e-01
   1.4433000e-01
   1.3660000e-01
   1.3410000e-01
   1.7676000e-01
   9.5940000e-02
   9.8180000e-02
   1.1052000e-01
   8.4500000e-02
   3.4380000e-02
  -1.1500000e-03
   8.0300000e-03
  -4.3210000e-02
  -4.3870000e-02
  -1.3174000e-01
  -1.4501000e-01
  -1.3865000e-01
  -1.9714000e-01
  -2.0322000e-01
  -2.4734000e-01
  -2.1962000e-01
  -2.3717000e-01
  -2.2889000e-01
  -2.2458000e-01
  -2.2041000e-01
  -2.0081000e-01
  -1.6783000e-01
  -1.4937000e-01
  -1.4027000e-01
  -5.8760000e-02
  -4.8890000e-02
  -4.4100000e-03
   4.7700000e-03
   4.5100000e-02
   1.0786000e-01
   6.8130000e-02
   1.2618000e-01
   1.3002000e-01
   1.7896000e-01
   1.6467000e-01
   1.5102000e-01
   2.2412000e-01
   1.5716000e-01
   1.9829000e-01
   1.9248000e-01
   1.6980000e-01
   1.9579000e-01
   1.5834000e-01
   1.9618000e-01
   1.5094000e-01
   1.0890000e-01
   1.0433000e-01
   7.5240000e-02
   4.7050000e-02
   9.0500000e-03
  -2.6070000e-02
  -5.6510000e-02
  -6.1090000e-02
  -1.0899000e-01
  -1.3172000e-01
  -1.3937000e-01
  -1.6944000e-01
  -1.5546000e-01
  -2.3330000e-01
  -1.9763000e-01
  -2.3031000e-01
  -2.2225000e-01
  -2.0873000e-01
  -2.5507000e-01
  -1.8897000e-01
  -2.0226000e-01
  -1.5236000e-01
  -1.5598000e-01
  -1.0553000e-01
  -8.0420000e-02
  -5.8730000e-02
  -1.1820000e-02
   1.7880000e-02
   5.7930000e-02
   8.1190000e-02
   1.0348000e-01
   1.3229000e-01
   1.6983000e-01
   1.5719000e-01
   2.0651000e-01
   1.8335000e-01
   2.0355000e-01
   1.7822000e-01
   2.0517000e-01
   1.6670000e-01
   1.5332000e-01
   1.6465000e-01
   1.4850000e-01
   1.2607000e-01
   9.4040000e-02
   1.0644000e-01
   1.0285000e-01
   7.8530000e-02
   5.4780000e-02
   2.8800000e-03
   9.0000000e-04
  -4.3300000e-03
  -4.2420000e-02
  -7.1370000e-02
  -1.0356000e-01
  -1.4109000e-01
  -1.4011000e-01
  -1.7940000e-01
  -2.1191000e-01
  -2.2225000e-01
  -2.3303000e-01
  -2.4674000e-01
  -2.4361000e-01
  -2.2927000e-01
  -2.0531000e-01
  -1.8806000e-01
  -1.6396000e-01
  -1.3890000e-01
  -1.1880000e-01
  -4.7190000e-02
  -5.7410000e-02
  -1.7850000e-02
   8.9900000e-03
   5.5960000e-02
   1.1063000e-01
   8.2560000e-02
   1.5519000e-01
   1.0219000e-01
   1.9102000e-01
   1.7098000e-01
   1.6835000e-01
   1.8373000e-01
   1.7065000e-01
   2.1562000e-01
   1.6338000e-01
   1.8324000e-01
   1.6547000e-01
   1.6086000e-01
   1.5053000e-01
   1.3484000e-01
   1.0498000e-01
   1.0161000e-01
   5.3030000e-02
   9.6790000e-02
  -6.9600000e-03
   3.7000000e-03
  -2.1330000e-02
  -7.4300000e-02
  -4.1480000e-02
  -1.4907000e-01
  -1.0150000e-01
  -1.8488000e-01
  -1.6456000e-01
  -1.9930000e-01
  -2.3854000e-01
  -2.0048000e-01
  -2.6815000e-01
  -2.0161000e-01
  -2.7725000e-01
  -2.0846000e-01
  -1.8280000e-01
  -1.9796000e-01
  -1.3780000e-01
  -1.6300000e-01
  -1.8590000e-02
  -4.7080000e-02
  -2.5220000e-02
   4.6120000e-02
   4.0470000e-02
   1.3446000e-01
   8.5050000e-02
   1.3608000e-01
   1.1943000e-01
   1.7542000e-01
   1.6445000e-01
   1.6525000e-01
   1.6333000e-01
   1.5870000e-01
   2.0761000e-01
   1.4877000e-01
   1.8250000e-01
   1.6717000e-01
   1.7923000e-01
   1.6023000e-01
   1.3843000e-01
   1.5801000e-01
   1.1628000e-01
   9.7170000e-02
   6.5610000e-02
   1.2370000e-02
   1.3540000e-02
  -4.0580000e-02
  -6.4270000e-02
  -1.0712000e-01
  -1.2695000e-01
  -1.5579000e-01
  -1.8014000e-01
  -1.7822000e-01
  -2.3769000e-01
  -2.6097000e-01
  -2.4791000e-01
  -2.3130000e-01
  -2.3547000e-01
  -2.5312000e-01
  -2.2058000e-01
  -1.6742000e-01
  -1.6626000e-01
  -1.3599000e-01
  -1.0246000e-01
  -6.6270000e-02
  -2.4210000e-02
  -2.4180000e-02
   3.5010000e-02
   4.4860000e-02
   6.4540000e-02
   1.2919000e-01
   1.0652000e-01
   1.4608000e-01
   1.8535000e-01
   1.7347000e-01
   1.9327000e-01
   1.8765000e-01
   2.1115000e-01
   1.9832000e-01
   1.7353000e-01
   1.5842000e-01
   1.9031000e-01
   1.7265000e-01
   1.5612000e-01
   1.0435000e-01
   1.3764000e-01
   1.1236000e-01
   6.4020000e-02
   5.2070000e-02
   6.8000000e-03
  -2.2320000e-02
  -5.3410000e-02
  -6.4600000e-02
  -1.0433000e-01
  -1.4419000e-01
  -1.4534000e-01
  -1.8280000e-01
  -2.1024000e-01
  -2.1222000e-01
  -2.2170000e-01
  -2.3103000e-01
  -2.4065000e-01
  -2.3445000e-01
  -2.1839000e-01
  -2.0701000e-01
  -1.8614000e-01
  -1.8696000e-01
  -1.2300000e-01
  -1.1913000e-01
  -9.3470000e-02
  -2.9390000e-02
  -4.2880000e-02
   3.9920000e-02
   4.6990000e-02
   1.0271000e-01
   1.0219000e-01
   1.3344000e-01
   1.9371000e-01
   1.5974000e-01
   1.7591000e-01
   1.9102000e-01
   1.9269000e-01
   1.8134000e-01
   1.9895000e-01
   1.9119000e-01
   1.7893000e-01
   1.5998000e-01
   1.7350000e-01
   1.2401000e-01
   1.3375000e-01
   8.0230000e-02
   9.9830000e-02
   3.9510000e-02
   3.5950000e-02
   9.1000000e-03
  -3.0020000e-02
  -1.2280000e-02
  -6.5750000e-02
  -8.9790000e-02
  -1.2223000e-01
  -9.4730000e-02
  -1.8041000e-01
  -1.9675000e-01
  -2.0424000e-01
  -2.2318000e-01
  -2.1781000e-01
  -2.6642000e-01
  -2.4630000e-01
  -2.6735000e-01
  -1.9664000e-01
  -2.0605000e-01
  -1.9801000e-01
  -1.5239000e-01
  -8.7630000e-02
  -8.0280000e-02
  -3.5040000e-02
  -6.2200000e-03
   2.4700000e-03
   9.2950000e-02
   7.6720000e-02
   1.1220000e-01
   1.5587000e-01
   1.3566000e-01
   1.9220000e-01
   1.5022000e-01
   2.1693000e-01
   1.8820000e-01
   1.8228000e-01
   2.0692000e-01
   1.9280000e-01
   1.8685000e-01
   1.4107000e-01
   1.6275000e-01
   1.5431000e-01
   9.7440000e-02
   1.3638000e-01
   7.6360000e-02
   8.7300000e-02
   5.7500000e-02
  -9.9800000e-03
   1.2150000e-02
  -4.5650000e-02
  -5.9940000e-02
  -7.7790000e-02
  -1.4770000e-01
  -1.3120000e-01
  -1.9733000e-01
  -1.8757000e-01
  -2.1937000e-01
  -2.5959000e-01
  -2.5134000e-01
  -2.5003000e-01
  -2.2911000e-01
  -2.6456000e-01
  -2.3253000e-01
  -1.6840000e-01
  -1.7929000e-01
  -1.3336000e-01
  -1.1708000e-01
  -8.0310000e-02
  -3.9590000e-02
   1.4000000e-03
   4.4830000e-02
   2.8650000e-02
   1.1719000e-01
   1.3981000e-01
   1.4562000e-01
   1.6218000e-01
   1.9497000e-01
   1.9478000e-01
   1.9231000e-01
   2.0182000e-01
   1.8938000e-01
   1.5974000e-01
   1.9472000e-01
   1.5442000e-01
   1.4510000e-01
   1.2982000e-01
   1.5192000e-01
   1.2207000e-01
   1.2311000e-01
   1.2031000e-01
   6.8410000e-02
   4.8010000e-02
   3.7150000e-02
   1.4300000e-03
  -3.0000000e-02
  -7.8310000e-02
  -1.0479000e-01
  -1.1431000e-01
  -1.6999000e-01
  -1.8661000e-01
  -2.0720000e-01
  -2.3267000e-01
  -2.6184000e-01
  -2.4857000e-01
  -2.6667000e-01
  -2.6609000e-01
  -2.3119000e-01
  -2.3177000e-01
  -1.9593000e-01
  -1.6914000e-01
  -1.4033000e-01
  -8.2470000e-02
  -6.2240000e-02
  -2.2000000e-04
  -6.2500000e-03
   4.9080000e-02
   9.1630000e-02
   1.0027000e-01
   1.3386000e-01
   1.2780000e-01
   1.5524000e-01
   1.6004000e-01
   1.8825000e-01
   1.3961000e-01
   2.0130000e-01
   1.6108000e-01
   1.9993000e-01
   1.7315000e-01
   1.8891000e-01
   1.9826000e-01
   1.5889000e-01
   1.9823000e-01
   1.3174000e-01
   1.4395000e-01
   1.1003000e-01
   9.5740000e-02
   3.7260000e-02
  -3.1500000e-03
   3.8900000e-03
  -7.7540000e-02
  -8.7220000e-02
  -1.2834000e-01
  -1.6695000e-01
  -1.6717000e-01
  -2.2017000e-01
  -2.1745000e-01
  -2.4087000e-01
  -2.5554000e-01
  -2.4290000e-01
  -2.8189000e-01
  -2.2645000e-01
  -2.3958000e-01
  -2.1756000e-01
  -1.8757000e-01
  -1.5955000e-01
  -1.3481000e-01
  -9.3800000e-02
  -5.0750000e-02
  -2.0180000e-02
  -7.5900000e-03
   2.9470000e-02
   5.4180000e-02
   1.2026000e-01
   1.0841000e-01
   1.4767000e-01
   1.5881000e-01
   1.9812000e-01
   2.1471000e-01
   1.8938000e-01
   1.9439000e-01
   2.0986000e-01
   2.2933000e-01
   2.0287000e-01
   1.6547000e-01
   1.9231000e-01
   1.8625000e-01
   1.6144000e-01
   1.2119000e-01
   1.0309000e-01
   8.9990000e-02
   5.2890000e-02
   1.8400000e-02
  -2.0370000e-02
  -2.9670000e-02
  -5.9850000e-02
  -8.4260000e-02
  -1.0863000e-01
  -1.5957000e-01
  -1.8047000e-01
  -1.9637000e-01
  -1.9006000e-01
  -2.9688000e-01
  -2.6527000e-01
  -2.5348000e-01
  -2.6316000e-01
  -2.6368000e-01
  -2.5323000e-01
  -1.8894000e-01
  -1.9908000e-01
  -1.4183000e-01
  -1.1071000e-01
  -8.6590000e-02
  -4.6170000e-02
  -2.3310000e-02
   2.5250000e-02
   1.2690000e-02
   1.0405000e-01
   1.1192000e-01
   1.1592000e-01
   1.4208000e-01
   1.6827000e-01
   2.0363000e-01
   1.3854000e-01
   2.3174000e-01
   2.0821000e-01
   2.0651000e-01
   2.0084000e-01
   2.0495000e-01
   2.0687000e-01
   1.4718000e-01
   2.0054000e-01
   1.3602000e-01
   1.4718000e-01
   8.9380000e-02
   9.0180000e-02
   6.8270000e-02
  -1.9850000e-02
   2.6600000e-03
  -4.7300000e-02
  -7.4080000e-02
  -1.0556000e-01
  -1.7312000e-01
  -1.1469000e-01
