# Supplementary material for: A Novel Classification Method for Flutter Signals Based on the CNN and STFT
Source: Hindawi journal article supplement (doi:10.1155/2019/9375437), 2019-04-09
Supplement: f1 [file 9375437.f1.zip › 01_9_z29.5_32channel.txt]

   3.1500000e-03
   7.9700000e-02
   4.1150000e-02
   4.1240000e-02
   7.9290000e-02
   4.6800000e-02
   4.7790000e-02
   6.2350000e-02
   5.9250000e-02
   7.5890000e-02
   6.5000000e-03
   6.6760000e-02
   3.2630000e-02
   4.8830000e-02
   3.5750000e-02
   2.3000000e-02
   2.9010000e-02
   1.9030000e-02
   2.4070000e-02
   2.1060000e-02
  -2.4320000e-02
  -6.0300000e-03
  -4.2470000e-02
   1.5570000e-02
  -6.1800000e-02
  -4.8560000e-02
  -3.1500000e-02
  -4.4940000e-02
  -3.0600000e-02
  -8.6700000e-02
  -3.0050000e-02
  -7.2190000e-02
  -3.6270000e-02
  -5.2560000e-02
  -4.0360000e-02
  -2.1740000e-02
  -3.6630000e-02
   1.4610000e-02
  -1.0140000e-02
   2.3030000e-02
  -1.3190000e-02
   1.7880000e-02
   1.8590000e-02
   4.1510000e-02
   3.6690000e-02
   3.4330000e-02
   3.8360000e-02
   4.7020000e-02
   4.4910000e-02
   6.4100000e-02
   5.4810000e-02
   5.4730000e-02
   6.4600000e-02
   7.6330000e-02
   8.3160000e-02
   5.9060000e-02
   9.1490000e-02
   5.2370000e-02
   4.3270000e-02
   6.1140000e-02
   4.5080000e-02
  -2.9600000e-03
   1.3050000e-02
   3.3070000e-02
   1.0890000e-02
  -3.9150000e-02
  -2.1880000e-02
  -6.4460000e-02
  -4.8060000e-02
  -5.0480000e-02
  -6.9780000e-02
  -6.1030000e-02
  -5.7850000e-02
  -4.3760000e-02
  -5.2620000e-02
  -5.4530000e-02
  -6.3910000e-02
  -3.2490000e-02
  -5.5660000e-02
  -4.2530000e-02
  -5.3050000e-02
  -3.6900000e-02
  -1.4280000e-02
  -1.9440000e-02
   3.0700000e-03
   1.0860000e-02
   1.9030000e-02
   1.5980000e-02
   4.3380000e-02
   4.6610000e-02
   5.2670000e-02
   7.0930000e-02
   6.0950000e-02
   7.1670000e-02
   5.4230000e-02
   8.8920000e-02
   6.1010000e-02
   6.0790000e-02
   6.8490000e-02
   7.4820000e-02
   6.3830000e-02
   4.3790000e-02
   8.5430000e-02
   5.0720000e-02
   6.1360000e-02
   1.4260000e-02
   4.0390000e-02
   4.6360000e-02
  -7.1000000e-03
  -1.2600000e-03
   2.8800000e-03
  -5.4070000e-02
  -3.3670000e-02
  -5.5850000e-02
  -5.7630000e-02
  -4.5490000e-02
  -1.0087000e-01
  -4.6420000e-02
  -7.9050000e-02
  -7.4690000e-02
  -3.8930000e-02
  -7.3670000e-02
   1.2600000e-03
  -7.2110000e-02
  -9.7300000e-03
  -4.5200000e-03
  -4.9000000e-02
   8.9400000e-03
  -2.8570000e-02
  -1.1500000e-03
  -2.1100000e-03
   2.6790000e-02
   2.8540000e-02
   3.2630000e-02
   3.9780000e-02
   6.8710000e-02
   4.8860000e-02
   6.4160000e-02
   1.0285000e-01
   8.1730000e-02
   4.8690000e-02
   1.1203000e-01
   8.0250000e-02
   8.3710000e-02
   9.1660000e-02
   7.5980000e-02
   6.6650000e-02
   4.6470000e-02
   4.8750000e-02
   4.5710000e-02
   2.8100000e-02
   6.9900000e-03
  -2.7800000e-02
  -3.2100000e-03
   2.1140000e-02
  -2.9500000e-02
  -1.7820000e-02
  -5.0090000e-02
  -2.1660000e-02
  -6.0900000e-02
  -7.0190000e-02
  -2.6050000e-02
  -7.5760000e-02
  -4.9300000e-02
  -5.8480000e-02
  -5.6230000e-02
  -6.8110000e-02
  -8.0800000e-02
  -2.1330000e-02
  -5.6260000e-02
  -3.8740000e-02
  -4.8300000e-03
  -2.0920000e-02
   1.0420000e-02
   1.4370000e-02
  -2.5000000e-03
   7.1600000e-03
   2.3440000e-02
   5.1660000e-02
   7.1010000e-02
   5.5440000e-02
   7.3840000e-02
   8.1190000e-02
   1.0789000e-01
   7.8420000e-02
   7.9290000e-02
   1.0855000e-01
   4.7210000e-02
   9.5520000e-02
   8.2200000e-02
   3.9870000e-02
   5.1680000e-02
   8.7500000e-03
   4.0800000e-02
   1.7990000e-02
   8.0600000e-03
  -3.4300000e-03
   1.3850000e-02
   3.1800000e-03
  -8.7200000e-03
  -1.1680000e-02
  -3.9130000e-02
  -1.1650000e-02
  -4.5130000e-02
  -1.5960000e-02
  -1.5710000e-02
  -5.6780000e-02
  -2.8410000e-02
  -4.9130000e-02
  -5.5930000e-02
  -5.9520000e-02
  -7.7540000e-02
  -3.8770000e-02
  -6.7720000e-02
  -7.3950000e-02
  -4.3950000e-02
  -2.3580000e-02
  -3.4380000e-02
  -1.6510000e-02
   1.5520000e-02
   2.0150000e-02
   5.5660000e-02
   4.2990000e-02
   4.1950000e-02
   5.7880000e-02
   8.3190000e-02
   6.4160000e-02
   6.7310000e-02
   5.6730000e-02
   8.7190000e-02
   6.9400000e-02
   7.1450000e-02
   5.0450000e-02
   8.4090000e-02
   6.1330000e-02
   6.6320000e-02
   4.9980000e-02
   1.4150000e-02
   6.2600000e-02
   1.6070000e-02
   3.0870000e-02
   5.9800000e-03
   1.2780000e-02
   1.0700000e-03
   1.7410000e-02
  -9.4600000e-03
  -5.1410000e-02
  -1.0860000e-02
  -4.2580000e-02
  -2.7580000e-02
  -3.2190000e-02
  -6.9290000e-02
  -4.4280000e-02
  -4.2360000e-02
  -5.6290000e-02
  -7.9180000e-02
  -3.2930000e-02
  -7.3590000e-02
  -5.0120000e-02
  -4.1430000e-02
  -4.4970000e-02
  -4.2280000e-02
  -1.8100000e-02
  -9.9000000e-03
   3.4710000e-02
   1.4000000e-03
   4.1840000e-02
   5.2040000e-02
   7.8310000e-02
   7.0820000e-02
   6.1910000e-02
   7.4190000e-02
   4.1480000e-02
   9.8950000e-02
   7.7400000e-02
   5.4480000e-02
   8.0470000e-02
   3.5480000e-02
   8.6010000e-02
   5.5380000e-02
   4.4090000e-02
   4.9050000e-02
   4.1620000e-02
   5.2260000e-02
   2.1140000e-02
   2.5960000e-02
   3.0410000e-02
   6.4200000e-03
  -3.0400000e-03
  -5.7600000e-03
   2.4570000e-02
  -4.8480000e-02
  -2.0150000e-02
  -1.2500000e-02
  -4.0990000e-02
  -1.2120000e-02
  -9.4760000e-02
  -5.9220000e-02
  -4.5270000e-02
  -7.9980000e-02
  -7.4800000e-02
  -5.1050000e-02
  -3.7670000e-02
  -6.3200000e-02
  -2.7450000e-02
  -2.4070000e-02
  -7.4300000e-03
   5.8000000e-04
   1.3270000e-02
   3.3560000e-02
   4.0060000e-02
   2.7750000e-02
   6.6490000e-02
   6.1660000e-02
   7.4300000e-02
   7.6440000e-02
   5.7630000e-02
   4.2830000e-02
   8.0230000e-02
   2.2700000e-02
   4.9350000e-02
   7.0990000e-02
   5.2830000e-02
   5.9580000e-02
   5.3050000e-02
   4.8890000e-02
   6.4080000e-02
   3.8250000e-02
   5.5270000e-02
   2.7860000e-02
   4.2500000e-02
   1.3270000e-02
   7.3200000e-03
   2.7200000e-02
  -4.4700000e-03
  -1.9000000e-02
  -2.5910000e-02
  -4.3160000e-02
  -4.1020000e-02
  -5.8760000e-02
  -5.2040000e-02
  -6.7450000e-02
  -8.7550000e-02
  -5.0750000e-02
  -7.2600000e-02
  -3.2220000e-02
  -4.8120000e-02
  -3.9670000e-02
  -1.1900000e-02
  -2.7090000e-02
  -1.6450000e-02
  -4.2640000e-02
   1.4260000e-02
   1.9170000e-02
   6.6400000e-03
   2.7360000e-02
   1.1930000e-02
   2.7830000e-02
   5.4890000e-02
   5.1900000e-02
   2.6100000e-02
   4.9020000e-02
   6.2020000e-02
   7.5870000e-02
   7.3400000e-02
   4.1570000e-02
   7.3260000e-02
   6.1280000e-02
   5.0940000e-02
   6.8680000e-02
   7.5400000e-02
   6.6710000e-02
   6.8300000e-02
   9.9170000e-02
   2.5860000e-02
   5.3740000e-02
  -2.5500000e-03
   8.0900000e-03
   1.7080000e-02
  -5.3880000e-02
  -1.8210000e-02
  -3.3230000e-02
  -3.5180000e-02
  -6.5970000e-02
  -5.5820000e-02
  -5.8650000e-02
  -6.3340000e-02
  -5.5910000e-02
  -5.9140000e-02
  -5.7770000e-02
  -2.2570000e-02
  -7.9020000e-02
  -3.0960000e-02
  -1.6150000e-02
  -1.3570000e-02
  -4.8800000e-03
  -5.3490000e-02
   2.3940000e-02
  -2.1900000e-03
  -6.0000000e-04
  -2.8500000e-03
   2.5470000e-02
   1.3430000e-02
   3.9020000e-02
   6.9530000e-02
   2.6920000e-02
   7.5350000e-02
   9.5500000e-02
   6.0270000e-02
   9.6430000e-02
   1.0849000e-01
   8.3630000e-02
   9.9030000e-02
   6.8630000e-02
   7.6740000e-02
   5.0780000e-02
   5.0920000e-02
   4.7900000e-02
   3.2460000e-02
   1.8750000e-02
  -1.1240000e-02
   1.9520000e-02
  -5.1300000e-02
  -3.1500000e-03
  -2.8130000e-02
  -1.6010000e-02
  -3.0850000e-02
  -4.4750000e-02
  -1.5000000e-02
  -4.0720000e-02
  -2.6650000e-02
  -6.4160000e-02
  -7.0030000e-02
  -3.8930000e-02
  -5.3220000e-02
  -4.3950000e-02
  -6.1640000e-02
  -5.9440000e-02
  -3.4160000e-02
  -6.2210000e-02
  -3.7780000e-02
  -2.4270000e-02
  -1.2010000e-02
   2.2780000e-02
  -2.6810000e-02
   2.3390000e-02
   2.4160000e-02
   7.5210000e-02
   3.2710000e-02
   3.9240000e-02
   4.9460000e-02
   9.2020000e-02
   9.0180000e-02
   8.5680000e-02
   6.8570000e-02
   7.1150000e-02
   7.8030000e-02
   8.0800000e-02
   3.1810000e-02
   5.1520000e-02
   5.0590000e-02
   4.0090000e-02
   4.7380000e-02
   2.8790000e-02
   3.1640000e-02
   3.4190000e-02
   1.5660000e-02
   4.9900000e-03
   8.7500000e-03
  -2.0430000e-02
   1.4000000e-04
  -1.8210000e-02
  -2.3580000e-02
  -3.3230000e-02
  -2.5690000e-02
  -3.2960000e-02
  -1.9170000e-02
  -5.0920000e-02
  -6.6240000e-02
  -7.3860000e-02
  -5.4430000e-02
  -8.6700000e-02
  -7.0440000e-02
  -8.3790000e-02
  -6.9180000e-02
  -3.1750000e-02
  -3.0900000e-02
  -3.0240000e-02
  -1.1870000e-02
   1.5600000e-02
   5.8730000e-02
   4.7540000e-02
   3.4140000e-02
   8.2940000e-02
   3.7400000e-02
   9.1850000e-02
   6.5340000e-02
   5.7170000e-02
   8.5630000e-02
   6.0290000e-02
   8.7220000e-02
   8.9000000e-02
   3.1090000e-02
   8.9880000e-02
   4.0470000e-02
   4.7630000e-02
   4.3900000e-02
   6.4240000e-02
   1.2530000e-02
   7.8140000e-02
   2.0370000e-02
   3.1040000e-02
   1.5930000e-02
   8.0900000e-03
  -4.4400000e-03
  -1.9470000e-02
  -1.5190000e-02
  -1.6920000e-02
  -3.6250000e-02
  -7.1310000e-02
  -8.4060000e-02
  -3.6160000e-02
  -8.7300000e-02
  -5.4510000e-02
  -1.0487000e-01
  -5.7850000e-02
  -4.3070000e-02
  -7.5620000e-02
  -4.5600000e-02
  -2.9200000e-02
  -1.4560000e-02
   1.7850000e-02
  -2.9530000e-02
   3.1300000e-03
   4.3680000e-02
   1.5790000e-02
   6.6540000e-02
   1.3200000e-03
   6.4980000e-02
   7.2360000e-02
   3.0160000e-02
   8.9490000e-02
   3.1450000e-02
   8.7270000e-02
   8.5630000e-02
   5.3930000e-02
   1.0342000e-01
   7.5130000e-02
   8.6560000e-02
   9.5830000e-02
   5.4890000e-02
   7.1750000e-02
   7.3840000e-02
   5.4590000e-02
   3.4490000e-02
   4.3540000e-02
   1.7990000e-02
   2.4840000e-02
  -2.8130000e-02
  -5.2510000e-02
  -4.0940000e-02
  -4.8060000e-02
  -5.7550000e-02
  -7.3450000e-02
  -7.3120000e-02
  -7.6800000e-02
  -4.2610000e-02
  -1.0452000e-01
  -7.2250000e-02
  -9.5850000e-02
  -4.7270000e-02
  -5.1080000e-02
  -7.0790000e-02
  -2.7830000e-02
  -3.3810000e-02
   1.6830000e-02
  -1.3020000e-02
   6.2500000e-03
   6.0000000e-03
   1.9410000e-02
   4.7410000e-02
   1.0970000e-02
   5.2560000e-02
   5.9520000e-02
   8.4120000e-02
   5.2230000e-02
   6.8190000e-02
   6.4430000e-02
   7.7680000e-02
   6.4100000e-02
   7.9650000e-02
   3.5340000e-02
   1.0093000e-01
   5.6590000e-02
   6.0480000e-02
   6.1800000e-02
   2.2510000e-02
   5.9830000e-02
   2.4540000e-02
   3.3340000e-02
   1.3160000e-02
  -1.1000000e-03
   3.4800000e-03
   1.5100000e-03
  -1.9060000e-02
  -6.1280000e-02
  -1.1930000e-02
  -7.4630000e-02
  -3.7290000e-02
  -7.6250000e-02
  -6.4460000e-02
  -6.3310000e-02
  -4.9020000e-02
  -8.4750000e-02
  -3.2760000e-02
  -4.7080000e-02
  -2.5880000e-02
  -5.0310000e-02
  -2.1880000e-02
   1.1050000e-02
  -1.4200000e-02
  -5.8000000e-04
   1.9190000e-02
  -1.1190000e-02
   2.0700000e-02
   2.5500000e-03
   2.3720000e-02
   1.4530000e-02
   1.1760000e-02
   3.6380000e-02
   8.2200000e-02
   2.1190000e-02
   5.4120000e-02
   9.9970000e-02
   5.5990000e-02
   7.3180000e-02
   7.7040000e-02
   7.2220000e-02
   6.6110000e-02
   7.6220000e-02
   5.2480000e-02
   7.4000000e-02
   4.9330000e-02
   1.4750000e-02
   6.7830000e-02
   1.7500000e-03
  -1.1950000e-02
   2.7530000e-02
  -3.5070000e-02
   1.2200000e-02
  -3.2760000e-02
  -4.5100000e-02
  -2.9800000e-02
  -4.4170000e-02
  -5.1240000e-02
  -3.8300000e-02
  -4.2500000e-02
  -9.1850000e-02
  -4.2030000e-02
  -5.0070000e-02
  -5.4730000e-02
  -4.7210000e-02
  -3.4790000e-02
  -6.5040000e-02
  -4.3510000e-02
  -4.3540000e-02
  -4.6470000e-02
   2.0780000e-02
  -2.1500000e-02
  -1.8260000e-02
   4.7900000e-02
   2.4130000e-02
   5.3680000e-02
   4.7570000e-02
   6.7260000e-02
   8.4200000e-02
   1.0526000e-01
   9.3410000e-02
   1.0323000e-01
   9.9990000e-02
   9.2780000e-02
   8.2580000e-02
   1.1244000e-01
   2.1720000e-02
   6.8520000e-02
   6.8550000e-02
   6.7560000e-02
   5.2830000e-02
   8.8300000e-03
   3.5840000e-02
   4.8420000e-02
  -6.5000000e-03
  -1.2780000e-02
   1.8890000e-02
  -1.9270000e-02
  -1.9170000e-02
  -1.4340000e-02
  -2.4050000e-02
  -5.1220000e-02
  -5.5910000e-02
  -6.5120000e-02
  -5.9500000e-02
  -9.9340000e-02
  -6.3250000e-02
  -8.0550000e-02
  -6.0950000e-02
  -7.9270000e-02
  -7.0900000e-02
  -5.5910000e-02
  -4.0880000e-02
  -6.5800000e-02
  -8.0900000e-03
  -2.7000000e-04
   1.8730000e-02
   2.7560000e-02
   1.0200000e-02
   5.4950000e-02
   5.0750000e-02
   4.4720000e-02
   6.3530000e-02
   6.5560000e-02
   7.8530000e-02
   1.0978000e-01
   6.1390000e-02
   1.0559000e-01
   7.3560000e-02
   4.6140000e-02
   8.5350000e-02
   7.2710000e-02
   4.8310000e-02
   8.6640000e-02
   7.4820000e-02
   7.2270000e-02
   3.2240000e-02
   3.4790000e-02
   4.4400000e-03
   4.1480000e-02
   5.2000000e-04
  -2.9280000e-02
   3.6200000e-03
  -5.1960000e-02
  -2.5530000e-02
  -5.1190000e-02
  -5.3360000e-02
  -9.0340000e-02
  -6.1060000e-02
  -1.0139000e-01
  -9.6730000e-02
  -7.0630000e-02
  -1.1518000e-01
  -6.4900000e-02
  -7.5320000e-02
  -5.1080000e-02
  -4.4310000e-02
  -3.1010000e-02
  -3.1390000e-02
   8.8000000e-03
   3.8690000e-02
   8.4400000e-03
   5.5470000e-02
   6.2510000e-02
   6.1010000e-02
   9.2020000e-02
   3.6380000e-02
   7.0080000e-02
   4.4360000e-02
   8.3760000e-02
   1.0419000e-01
   5.0070000e-02
   9.7140000e-02
   4.6340000e-02
   1.1244000e-01
   4.7650000e-02
   6.3800000e-02
   5.4840000e-02
   1.3760000e-02
   9.0670000e-02
   1.8640000e-02
   5.8430000e-02
   2.6400000e-02
   7.0200000e-03
   1.3960000e-02
  -1.0750000e-02
  -3.3070000e-02
  -2.7580000e-02
  -4.6470000e-02
  -5.1900000e-02
  -2.4620000e-02
  -9.4590000e-02
  -6.1800000e-02
  -6.7200000e-02
  -8.6340000e-02
  -6.1830000e-02
  -7.4360000e-02
  -7.0880000e-02
  -6.4510000e-02
  -4.6530000e-02
  -3.1670000e-02
  -2.3110000e-02
  -1.6830000e-02
  -4.1920000e-02
   2.9970000e-02
  -1.7680000e-02
   2.4900000e-02
   6.5000000e-03
   2.2370000e-02
   4.6230000e-02
   3.3200000e-02
   5.2200000e-02
   6.7610000e-02
   6.8660000e-02
   7.3730000e-02
   6.6410000e-02
   1.0954000e-01
   6.2490000e-02
   1.0959000e-01
   8.4940000e-02
   9.9990000e-02
   7.7680000e-02
   5.2560000e-02
   4.7130000e-02
   5.1240000e-02
   4.0960000e-02
   1.2060000e-02
   3.0490000e-02
  -4.3900000e-03
   2.2260000e-02
  -8.5000000e-03
  -7.8100000e-03
  -5.5140000e-02
  -1.7630000e-02
  -4.3700000e-02
  -4.3400000e-02
  -5.6020000e-02
  -5.1350000e-02
  -7.4360000e-02
  -2.5690000e-02
  -7.3700000e-02
  -9.2810000e-02
  -5.5490000e-02
  -8.1510000e-02
  -3.9540000e-02
  -6.2920000e-02
  -6.2620000e-02
  -3.6300000e-02
  -1.8590000e-02
  -2.3740000e-02
  -6.8800000e-03
   1.3050000e-02
   4.2500000e-03
   4.3050000e-02
   4.0770000e-02
   4.0580000e-02
   5.5600000e-02
   4.7900000e-02
   7.6280000e-02
   7.1700000e-02
   7.5620000e-02
   8.6940000e-02
   8.7000000e-02
   1.0106000e-01
   9.7120000e-02
   8.9440000e-02
   1.1063000e-01
   5.6730000e-02
   6.3990000e-02
   8.3760000e-02
   3.0980000e-02
   7.8280000e-02
  -4.9400000e-03
   2.1280000e-02
  -2.1700000e-03
   8.3600000e-03
  -3.8960000e-02
  -2.1110000e-02
  -6.8900000e-02
  -4.2640000e-02
  -5.7030000e-02
  -8.3680000e-02
  -5.1220000e-02
  -5.6760000e-02
  -7.1420000e-02
  -8.6480000e-02
  -5.4210000e-02
  -4.0910000e-02
  -8.0580000e-02
  -5.6340000e-02
  -5.4340000e-02
  -2.9750000e-02
  -7.4820000e-02
  -2.7390000e-02
  -1.8620000e-02
  -1.6970000e-02
  -1.6420000e-02
   2.7010000e-02
   3.6140000e-02
   4.5980000e-02
   5.8460000e-02
   5.0940000e-02
   9.6400000e-02
   9.6070000e-02
   6.9560000e-02
   9.8400000e-02
   9.5220000e-02
   1.2048000e-01
   8.9030000e-02
   6.9450000e-02
   9.8180000e-02
   7.4820000e-02
   6.0570000e-02
   7.5180000e-02
   5.1160000e-02
   3.0740000e-02
   1.5080000e-02
   2.4900000e-02
   1.6200000e-02
  -3.3500000e-03
  -2.7030000e-02
  -1.3410000e-02
  -4.8560000e-02
  -2.0510000e-02
  -2.6020000e-02
  -4.7760000e-02
  -7.5870000e-02
  -8.1760000e-02
  -7.5510000e-02
  -1.1433000e-01
  -6.0950000e-02
  -1.1145000e-01
  -7.5650000e-02
  -8.8290000e-02
  -7.0300000e-02
  -5.2560000e-02
  -4.4940000e-02
  -3.0520000e-02
   1.8260000e-02
  -1.6290000e-02
   3.1810000e-02
   8.3130000e-02
   2.9060000e-02
   6.4540000e-02
   9.5330000e-02
   7.2740000e-02
   4.6940000e-02
   6.8350000e-02
   8.5710000e-02
   4.8390000e-02
   7.4600000e-02
   9.4430000e-02
   8.3600000e-02
   6.8300000e-02
   6.2510000e-02
   8.4610000e-02
   5.9660000e-02
   2.7560000e-02
   4.5320000e-02
   5.6870000e-02
   5.7550000e-02
   1.1000000e-04
   4.6530000e-02
  -1.9820000e-02
  -1.1730000e-02
   2.2200000e-03
  -1.3020000e-02
  -4.6910000e-02
  -3.5370000e-02
  -2.6540000e-02
  -1.8920000e-02
  -7.7840000e-02
  -4.8830000e-02
  -8.8860000e-02
  -6.1720000e-02
  -9.5740000e-02
  -6.5670000e-02
  -5.7660000e-02
  -5.0390000e-02
  -6.8330000e-02
  -3.2790000e-02
  -4.9650000e-02
  -3.0410000e-02
  -1.4420000e-02
  -3.0000000e-05
   2.6020000e-02
   3.3120000e-02
   8.6600000e-03
   9.3770000e-02
   4.7460000e-02
   7.9590000e-02
   8.0770000e-02
   6.2710000e-02
   1.0084000e-01
   7.7870000e-02
   7.8740000e-02
   1.0090000e-01
   4.8090000e-02
   7.1750000e-02
   8.0010000e-02
   5.1410000e-02
   2.3830000e-02
   5.5030000e-02
   6.4870000e-02
   4.8120000e-02
   4.4970000e-02
   1.0800000e-02
   2.9830000e-02
   1.6010000e-02
   8.6400000e-03
   1.6090000e-02
  -3.6600000e-02
  -1.7440000e-02
  -4.1590000e-02
  -1.4450000e-02
  -8.0640000e-02
  -7.8420000e-02
  -7.5260000e-02
  -1.1812000e-01
  -7.0550000e-02
  -1.0740000e-01
  -9.1250000e-02
  -7.2800000e-02
  -5.7440000e-02
  -4.8640000e-02
  -2.9610000e-02
  -3.2020000e-02
  -4.0000000e-03
   1.3080000e-02
   1.8860000e-02
   2.9280000e-02
   2.7940000e-02
   2.5440000e-02
   5.5550000e-02
   3.6140000e-02
   5.9000000e-02
   2.0920000e-02
   9.0320000e-02
   4.6250000e-02
   5.9520000e-02
   7.5320000e-02
   6.5910000e-02
   9.4650000e-02
   6.6300000e-02
   6.6160000e-02
   9.0810000e-02
   9.4730000e-02
   5.8570000e-02
   5.9470000e-02
   6.8190000e-02
   5.1570000e-02
   2.5140000e-02
   6.4190000e-02
   1.9000000e-04
   4.7700000e-03
  -1.7880000e-02
  -2.2890000e-02
  -1.9300000e-02
  -7.1450000e-02
  -5.3470000e-02
  -7.7790000e-02
  -6.3770000e-02
  -8.2230000e-02
  -8.7900000e-02
  -7.6610000e-02
  -7.2550000e-02
  -4.6340000e-02
  -9.5990000e-02
  -6.0240000e-02
  -6.2760000e-02
  -4.4750000e-02
  -4.3680000e-02
  -3.2660000e-02
  -4.3210000e-02
  -2.0760000e-02
  -1.8920000e-02
   1.7740000e-02
   1.5000000e-02
   4.3980000e-02
   2.7360000e-02
   6.8350000e-02
   7.0600000e-02
   9.3880000e-02
   9.1470000e-02
   8.4780000e-02
   8.9600000e-02
   7.2850000e-02
   1.2015000e-01
   8.5650000e-02
   8.8810000e-02
   1.1354000e-01
   1.1055000e-01
   9.6320000e-02
   8.2250000e-02
   5.9470000e-02
   7.0460000e-02
   5.0180000e-02
   8.3600000e-03
   1.4000000e-04
  -1.6750000e-02
  -1.8100000e-02
  -3.8410000e-02
  -1.4940000e-02
  -7.5290000e-02
  -7.0630000e-02
  -9.5770000e-02
  -7.4030000e-02
  -9.4260000e-02
  -8.9740000e-02
  -1.0153000e-01
  -6.7390000e-02
  -1.1019000e-01
  -7.3210000e-02
  -5.3880000e-02
  -7.2190000e-02
  -4.7840000e-02
  -4.3320000e-02
  -7.5400000e-03
  -2.1170000e-02
   1.7930000e-02
   1.8010000e-02
  -6.9000000e-04
   4.2250000e-02
   3.7890000e-02
   5.2180000e-02
   6.9200000e-02
   5.4730000e-02
   1.0279000e-01
   8.8780000e-02
   1.2426000e-01
   1.0359000e-01
   8.8010000e-02
   1.2780000e-01
   1.2333000e-01
   7.5040000e-02
   6.0320000e-02
   8.4750000e-02
   6.0870000e-02
   7.2140000e-02
   1.8900000e-03
   4.9110000e-02
   2.0340000e-02
  -1.7990000e-02
   3.3860000e-02
  -3.7260000e-02
  -1.3650000e-02
  -4.1100000e-02
  -4.8010000e-02
  -6.4080000e-02
  -5.4510000e-02
  -8.4780000e-02
  -6.1360000e-02
  -6.3470000e-02
  -1.0213000e-01
  -8.3820000e-02
  -3.2160000e-02
  -8.1240000e-02
  -9.4920000e-02
  -4.9300000e-02
  -1.0378000e-01
  -5.8100000e-02
  -5.8040000e-02
  -4.2640000e-02
  -1.8750000e-02
  -1.6860000e-02
   2.0150000e-02
   2.3910000e-02
   2.8100000e-02
   3.6880000e-02
   8.6890000e-02
   8.7160000e-02
   5.6430000e-02
   1.1694000e-01
   8.2910000e-02
   1.0339000e-01
   1.3018000e-01
   1.0581000e-01
   8.5650000e-02
   8.4090000e-02
   9.6160000e-02
   7.9400000e-02
   6.7670000e-02
   2.0760000e-02
   8.0990000e-02
   1.3930000e-02
   2.1660000e-02
   3.3590000e-02
   1.9580000e-02
   3.1300000e-03
  -1.5660000e-02
  -1.1100000e-02
  -4.0770000e-02
  -5.5220000e-02
  -4.8690000e-02
  -8.5410000e-02
  -5.1710000e-02
  -1.2785000e-01
  -1.0065000e-01
  -7.5920000e-02
  -1.0688000e-01
  -8.8530000e-02
  -7.7040000e-02
  -9.7330000e-02
  -4.4060000e-02
  -2.2370000e-02
  -4.9000000e-02
  -2.5390000e-02
  -1.0690000e-02
  -1.3900000e-02
  -1.9550000e-02
   1.4450000e-02
   6.8710000e-02
   5.6210000e-02
   8.6090000e-02
   7.4030000e-02
   8.3710000e-02
   1.1414000e-01
   8.2830000e-02
   7.8940000e-02
   8.1190000e-02
   8.4500000e-02
   8.1930000e-02
   7.5400000e-02
   1.0013000e-01
   7.3950000e-02
   7.8640000e-02
   6.1470000e-02
   6.7150000e-02
   4.3400000e-02
   4.6670000e-02
   2.3520000e-02
   2.7500000e-02
   9.0200000e-03
  -1.2940000e-02
  -7.1000000e-03
  -7.5700000e-03
  -1.9470000e-02
  -3.9290000e-02
  -4.6890000e-02
  -4.1020000e-02
  -5.0200000e-02
  -6.1960000e-02
  -8.5740000e-02
  -7.6850000e-02
  -1.0287000e-01
  -1.0603000e-01
  -9.0810000e-02
  -1.0145000e-01
  -9.6810000e-02
  -5.6560000e-02
  -4.8200000e-02
  -3.0870000e-02
  -4.5650000e-02
   1.6640000e-02
  -2.0870000e-02
   2.3720000e-02
   2.2070000e-02
   5.9720000e-02
   5.2590000e-02
   7.2160000e-02
   7.3560000e-02
   6.9070000e-02
   6.8740000e-02
   1.0904000e-01
   7.5650000e-02
   7.1590000e-02
   7.9760000e-02
   9.0340000e-02
   7.4910000e-02
   1.0518000e-01
   8.5380000e-02
   6.3090000e-02
   1.0589000e-01
   5.7220000e-02
   9.7690000e-02
   3.2960000e-02
   5.5360000e-02
   3.8000000e-02
  -4.7700000e-03
  -6.0300000e-03
  -2.0760000e-02
  -3.8800000e-02
  -4.6670000e-02
  -8.4480000e-02
  -7.9730000e-02
  -7.9620000e-02
  -9.1960000e-02
  -1.0370000e-01
  -7.3890000e-02
  -1.1902000e-01
  -9.6240000e-02
  -5.9740000e-02
  -1.2308000e-01
  -4.6690000e-02
  -6.8600000e-02
  -4.7190000e-02
  -2.9530000e-02
  -1.3700000e-03
  -3.0320000e-02
   1.5300000e-02
   3.6710000e-02
   3.3000000e-04
   7.2550000e-02
   3.3830000e-02
   5.0390000e-02
   1.1735000e-01
   8.4450000e-02
   9.5520000e-02
   1.0397000e-01
   7.4770000e-02
   1.2264000e-01
   9.7990000e-02
   7.3400000e-02
   8.1820000e-02
   7.7430000e-02
   8.3380000e-02
   7.7400000e-02
   6.4240000e-02
   3.6190000e-02
   3.4930000e-02
   5.8780000e-02
   3.2820000e-02
   6.3000000e-04
  -7.7000000e-04
   6.9000000e-04
  -3.6000000e-04
  -4.8090000e-02
  -5.7880000e-02
  -5.2940000e-02
  -7.0850000e-02
  -7.5760000e-02
  -8.5520000e-02
  -1.0932000e-01
  -1.1178000e-01
  -7.7890000e-02
  -1.0863000e-01
  -7.5400000e-02
  -9.5910000e-02
  -7.2710000e-02
  -4.7710000e-02
  -4.1320000e-02
  -2.3690000e-02
   2.7340000e-02
  -2.0120000e-02
   7.3200000e-03
   3.0490000e-02
   3.6600000e-02
   5.7720000e-02
   4.8830000e-02
   5.6070000e-02
   4.7160000e-02
   8.9600000e-02
   9.2730000e-02
   7.1290000e-02
   1.1184000e-01
   7.7320000e-02
   1.2346000e-01
   8.9300000e-02
   9.7500000e-02
   8.5900000e-02
   6.9830000e-02
   9.6810000e-02
   4.8370000e-02
   3.6550000e-02
   2.1500000e-02
   2.1550000e-02
   2.6950000e-02
  -3.0270000e-02
   9.1300000e-03
  -2.4400000e-02
  -2.3090000e-02
  -5.8130000e-02
  -5.3270000e-02
  -6.1910000e-02
  -8.2280000e-02
  -8.7440000e-02
  -9.4020000e-02
  -8.7350000e-02
  -6.8300000e-02
  -7.8360000e-02
  -6.4840000e-02
  -7.7540000e-02
  -5.9060000e-02
  -6.1120000e-02
  -5.9390000e-02
  -6.5860000e-02
  -6.6650000e-02
  -6.7400000e-03
  -4.6640000e-02
  -8.1700000e-03
   2.6510000e-02
   2.9780000e-02
   4.1240000e-02
   7.9730000e-02
   1.1998000e-01
   6.3140000e-02
   9.2620000e-02
   9.5830000e-02
   1.0745000e-01
   7.5840000e-02
   7.9050000e-02
   9.6900000e-02
   6.1880000e-02
   7.6610000e-02
   7.4190000e-02
   1.0356000e-01
   6.2100000e-02
   4.8830000e-02
   8.7660000e-02
   1.9600000e-02
   5.4510000e-02
   2.4570000e-02
   1.6560000e-02
   3.6190000e-02
  -4.1920000e-02
  -8.6900000e-03
  -8.3600000e-03
  -6.6710000e-02
  -4.4390000e-02
  -6.9200000e-02
  -8.0140000e-02
  -7.6910000e-02
  -1.0485000e-01
  -1.0153000e-01
  -1.0019000e-01
  -9.8980000e-02
  -1.1809000e-01
  -9.4620000e-02
  -7.2960000e-02
  -5.5380000e-02
  -4.8800000e-02
  -3.8850000e-02
  -2.2870000e-02
  -1.5520000e-02
   7.0200000e-03
   2.9090000e-02
   4.6610000e-02
   4.8910000e-02
   5.4150000e-02
   6.5450000e-02
   9.7060000e-02
   1.0515000e-01
   9.2560000e-02
   1.0252000e-01
   9.6620000e-02
   1.1587000e-01
   1.1304000e-01
   9.3630000e-02
   1.1091000e-01
   5.9000000e-02
   9.4290000e-02
   7.5100000e-02
   9.3470000e-02
   5.6870000e-02
   7.3650000e-02
   3.0050000e-02
   4.8560000e-02
  -1.2530000e-02
   1.4000000e-04
  -2.7360000e-02
  -3.2960000e-02
  -5.6290000e-02
  -7.4740000e-02
  -6.7970000e-02
  -7.2520000e-02
  -1.2730000e-01
  -8.8530000e-02
  -9.1580000e-02
  -1.0370000e-01
  -9.0320000e-02
  -1.0106000e-01
  -7.0790000e-02
  -8.1130000e-02
  -7.2000000e-02
  -6.2950000e-02
  -2.4680000e-02
  -1.8230000e-02
  -9.4600000e-03
   3.2080000e-02
   1.4090000e-02
   5.7080000e-02
   5.0590000e-02
   6.6430000e-02
   7.8850000e-02
   5.8100000e-02
   9.5660000e-02
   7.0660000e-02
   8.4720000e-02
   8.0910000e-02
   7.9490000e-02
   9.8920000e-02
   9.7720000e-02
   7.2160000e-02
   1.0298000e-01
   7.1590000e-02
   9.1470000e-02
   5.9830000e-02
   7.1200000e-02
   7.7210000e-02
   5.0860000e-02
   7.4500000e-02
   8.8800000e-03
   3.4440000e-02
   7.9800000e-03
  -2.7660000e-02
  -2.5010000e-02
  -5.5770000e-02
  -7.8800000e-02
  -2.6790000e-02
  -1.1847000e-01
  -1.0274000e-01
  -1.1222000e-01
  -1.1252000e-01
  -7.5810000e-02
  -1.3166000e-01
  -7.9460000e-02
  -7.1420000e-02
  -8.0140000e-02
  -6.8270000e-02
  -5.9880000e-02
  -4.3240000e-02
  -3.1010000e-02
  -3.7600000e-03
   1.2940000e-02
   1.1240000e-02
   4.9110000e-02
   4.3350000e-02
   4.1100000e-02
   6.0460000e-02
   6.6130000e-02
   9.8680000e-02
   6.5500000e-02
   1.1140000e-01
   1.2812000e-01
   8.5540000e-02
   1.3109000e-01
   9.8490000e-02
   1.0397000e-01
   8.7110000e-02
   9.2040000e-02
   1.1513000e-01
   5.8570000e-02
   6.7200000e-02
   6.1530000e-02
   6.9000000e-04
   2.8410000e-02
   6.0300000e-03
  -7.8400000e-03
  -3.0680000e-02
  -6.9560000e-02
  -2.6620000e-02
  -4.7980000e-02
  -5.6870000e-02
  -7.0770000e-02
  -8.0640000e-02
  -8.6390000e-02
  -4.6610000e-02
  -7.9810000e-02
  -7.9810000e-02
  -7.1700000e-02
  -8.6810000e-02
  -6.1720000e-02
  -9.5000000e-02
  -7.0630000e-02
  -5.0200000e-02
  -7.7870000e-02
  -5.6890000e-02
  -2.9890000e-02
  -6.8300000e-03
  -1.4500000e-03
   6.6900000e-03
   5.5300000e-02
   4.5570000e-02
   1.0954000e-01
   8.0420000e-02
   1.0158000e-01
   1.1351000e-01
   1.1365000e-01
   1.3734000e-01
   7.9840000e-02
   1.1864000e-01
   1.0060000e-01
   1.2681000e-01
   7.8640000e-02
   8.5490000e-02
   8.0170000e-02
   7.8420000e-02
   7.2990000e-02
   6.0980000e-02
   3.8820000e-02
   3.7300000e-03
   4.5620000e-02
   1.0750000e-02
  -4.1680000e-02
  -6.9900000e-03
  -7.1640000e-02
  -3.3670000e-02
  -3.7590000e-02
  -9.9420000e-02
  -6.5450000e-02
  -1.0345000e-01
  -1.1880000e-01
  -9.1440000e-02
  -1.2429000e-01
  -1.1277000e-01
  -1.0592000e-01
  -9.7910000e-02
  -1.0161000e-01
  -7.4990000e-02
  -6.5910000e-02
  -7.2770000e-02
   6.0600000e-03
  -3.9210000e-02
   6.5500000e-03
   1.6370000e-02
   2.4430000e-02
   5.8650000e-02
   5.1410000e-02
   1.0413000e-01
   6.8740000e-02
   8.5220000e-02
   1.1875000e-01
   8.8230000e-02
   1.3076000e-01
   9.8810000e-02
   1.2105000e-01
   9.7770000e-02
   8.4640000e-02
   1.0663000e-01
   8.9880000e-02
   5.8400000e-02
   5.7410000e-02
   6.2600000e-02
   4.4200000e-02
   1.2060000e-02
   5.8020000e-02
   2.1080000e-02
   6.5000000e-03
  -9.3200000e-03
  -8.1700000e-03
  -2.7560000e-02
  -8.1240000e-02
  -5.2070000e-02
  -8.2890000e-02
  -1.0753000e-01
  -9.9860000e-02
  -1.0657000e-01
  -1.2209000e-01
  -9.8870000e-02
  -1.0542000e-01
  -1.0811000e-01
  -7.4930000e-02
  -8.4560000e-02
  -4.8610000e-02
  -5.0940000e-02
  -3.6770000e-02
  -2.1910000e-02
   1.8210000e-02
  -4.3300000e-03
   3.3370000e-02
   5.8070000e-02
   7.9680000e-02
   4.3020000e-02
   9.1930000e-02
   7.5840000e-02
   8.7630000e-02
   1.0923000e-01
   6.9970000e-02
   1.0364000e-01
   5.3990000e-02
   1.0205000e-01
   9.3080000e-02
   8.3430000e-02
   7.8310000e-02
   9.2430000e-02
   1.1209000e-01
   8.8150000e-02
   4.9980000e-02
   7.8740000e-02
   2.7770000e-02
   4.2280000e-02
   2.5390000e-02
  -3.0350000e-02
  -1.3650000e-02
  -1.8970000e-02
  -6.7310000e-02
  -4.0990000e-02
  -8.4860000e-02
  -1.0282000e-01
  -1.1609000e-01
  -8.8730000e-02
  -1.1921000e-01
  -9.1360000e-02
  -1.1963000e-01
  -8.7680000e-02
  -9.9860000e-02
  -8.5050000e-02
  -8.0470000e-02
  -4.3210000e-02
  -3.0980000e-02
  -4.5490000e-02
   1.2600000e-03
   1.2720000e-02
   3.8280000e-02
   4.7190000e-02
   5.6340000e-02
   4.2110000e-02
   9.8620000e-02
   6.4820000e-02
   5.6670000e-02
   1.2127000e-01
   8.1430000e-02
   1.0575000e-01
   9.7120000e-02
   1.0885000e-01
   6.2570000e-02
   1.0279000e-01
   7.3950000e-02
   9.0370000e-02
   7.5890000e-02
   7.3780000e-02
   5.5140000e-02
   7.1700000e-02
   3.9020000e-02
   3.5120000e-02
   6.6000000e-04
   4.6600000e-03
   6.8000000e-03
  -1.7850000e-02
  -1.9030000e-02
  -5.4120000e-02
  -2.2840000e-02
  -8.7820000e-02
  -8.6180000e-02
  -8.4450000e-02
  -7.8060000e-02
  -1.0553000e-01
  -1.1562000e-01
  -7.9950000e-02
  -9.9880000e-02
  -8.1020000e-02
  -6.6570000e-02
  -7.6280000e-02
  -2.6400000e-02
  -6.0510000e-02
  -3.4880000e-02
   4.0600000e-03
   8.0000000e-05
   2.6300000e-03
   1.2480000e-02
   3.4050000e-02
   3.5120000e-02
   6.6520000e-02
   5.2510000e-02
   7.8830000e-02
   8.5270000e-02
   1.0402000e-01
   9.8760000e-02
   1.3142000e-01
   1.0926000e-01
   1.0951000e-01
   1.4293000e-01
   9.7800000e-02
   9.2370000e-02
   8.6610000e-02
   8.2860000e-02
   6.9480000e-02
   5.3850000e-02
   4.9000000e-02
   2.4210000e-02
   4.3020000e-02
  -1.6670000e-02
  -7.1000000e-04
  -1.4590000e-02
  -3.5480000e-02
  -2.7010000e-02
  -5.3960000e-02
  -7.5100000e-02
  -4.8170000e-02
  -7.7620000e-02
  -8.1050000e-02
  -9.0100000e-02
  -1.0402000e-01
  -1.0005000e-01
  -7.5290000e-02
  -9.9120000e-02
  -8.7660000e-02
  -6.8330000e-02
  -8.3160000e-02
  -5.8040000e-02
  -3.9070000e-02
  -1.5240000e-02
  -1.1930000e-02
  -1.4260000e-02
   4.1350000e-02
   2.5170000e-02
   5.9500000e-02
   6.6270000e-02
   9.0230000e-02
   8.9490000e-02
   1.0041000e-01
   1.2991000e-01
   1.1028000e-01
   1.1688000e-01
   1.3970000e-01
   1.2322000e-01
   1.1252000e-01
   7.8360000e-02
   1.1266000e-01
   1.0619000e-01
   6.4730000e-02
   9.8870000e-02
   3.5120000e-02
   7.4110000e-02
   3.6770000e-02
   3.9400000e-02
   3.4000000e-03
  -1.7160000e-02
  -4.2200000e-03
  -8.6480000e-02
  -6.0600000e-03
  -7.9210000e-02
  -8.4890000e-02
  -7.8500000e-02
  -8.6500000e-02
  -1.1006000e-01
  -1.0729000e-01
  -1.3684000e-01
  -9.9910000e-02
  -1.0633000e-01
  -1.2322000e-01
  -7.3620000e-02
  -8.2970000e-02
  -5.9170000e-02
  -4.2880000e-02
  -4.0390000e-02
  -1.4480000e-02
  -8.5000000e-04
   1.6310000e-02
   5.7250000e-02
   3.4600000e-02
   5.0970000e-02
   9.6620000e-02
   8.5520000e-02
   6.7910000e-02
   8.7050000e-02
   1.2338000e-01
   1.1669000e-01
   1.0901000e-01
   1.7262000e-01
   1.3896000e-01
   1.1148000e-01
   1.3218000e-01
   9.3740000e-02
   7.4500000e-02
   7.6330000e-02
   6.7340000e-02
   4.4860000e-02
   5.2590000e-02
   4.2250000e-02
   1.4180000e-02
  -1.4000000e-03
   8.0600000e-03
  -2.1880000e-02
  -5.2780000e-02
  -5.9800000e-02
  -6.0790000e-02
  -7.3450000e-02
  -9.0070000e-02
  -1.2645000e-01
  -7.8690000e-02
  -1.2667000e-01
  -1.1921000e-01
  -1.1675000e-01
  -1.2719000e-01
  -6.8160000e-02
  -8.0440000e-02
  -8.8730000e-02
  -6.6760000e-02
  -1.8620000e-02
  -2.9060000e-02
   3.4030000e-02
   2.8200000e-03
   2.1740000e-02
   7.8440000e-02
   4.9240000e-02
   1.0767000e-01
   7.4110000e-02
   5.8020000e-02
   1.0487000e-01
   1.0715000e-01
   7.3180000e-02
   1.2407000e-01
   6.5010000e-02
   1.0010000e-01
   9.3660000e-02
   9.9310000e-02
   7.8310000e-02
   1.2656000e-01
   9.7390000e-02
   8.3350000e-02
   8.7440000e-02
   7.8960000e-02
   6.8900000e-02
   3.9450000e-02
   3.6330000e-02
   6.0300000e-03
  -1.5520000e-02
  -1.0990000e-02
  -5.3740000e-02
  -6.9530000e-02
  -9.4260000e-02
  -9.6210000e-02
  -8.6480000e-02
  -1.2078000e-01
  -1.4222000e-01
  -5.7470000e-02
  -1.4754000e-01
  -8.5630000e-02
  -8.9710000e-02
  -8.3820000e-02
  -5.3270000e-02
  -4.7650000e-02
  -3.0980000e-02
  -2.7420000e-02
  -3.3150000e-02
  -4.7000000e-04
   9.5700000e-03
   2.8600000e-02
   2.9690000e-02
   2.7610000e-02
   5.1050000e-02
   9.4320000e-02
   6.4980000e-02
   1.1494000e-01
   6.7230000e-02
   1.2067000e-01
   1.2393000e-01
   1.0298000e-01
   9.1440000e-02
   1.2670000e-01
   8.8890000e-02
   1.2486000e-01
   7.4060000e-02
   7.9570000e-02
   9.2100000e-02
   6.3230000e-02
   7.5070000e-02
   5.0610000e-02
   1.6940000e-02
   2.2400000e-02
   1.5740000e-02
  -1.2900000e-03
  -2.3910000e-02
  -2.9450000e-02
  -4.1950000e-02
  -6.7120000e-02
  -8.0880000e-02
  -9.9690000e-02
  -1.1335000e-01
  -1.1771000e-01
  -1.3967000e-01
  -1.2270000e-01
  -1.1817000e-01
  -9.0370000e-02
  -9.9580000e-02
  -7.3070000e-02
  -7.2030000e-02
  -5.6480000e-02
  -4.3980000e-02
  -3.7890000e-02
  -4.0300000e-03
   6.4200000e-03
   2.4370000e-02
   4.4340000e-02
   4.9380000e-02
   5.6760000e-02
   7.8440000e-02
   6.5420000e-02
   8.4200000e-02
   8.7570000e-02
   9.9770000e-02
   1.2719000e-01
   1.2050000e-01
   1.3599000e-01
   1.1274000e-01
   1.3185000e-01
   1.0666000e-01
   1.1732000e-01
   7.8990000e-02
   1.0323000e-01
   6.3560000e-02
   6.4210000e-02
   4.1980000e-02
  -5.0000000e-05
   7.4900000e-03
  -4.7200000e-03
  -1.6290000e-02
  -4.1650000e-02
  -6.8900000e-02
  -6.4730000e-02
  -8.0910000e-02
  -8.7930000e-02
  -7.8390000e-02
  -9.8460000e-02
  -1.1625000e-01
  -9.1410000e-02
  -1.3191000e-01
  -9.9500000e-02
  -1.2152000e-01
  -1.1554000e-01
  -8.6230000e-02
  -9.7310000e-02
  -6.2070000e-02
  -7.0110000e-02
  -3.4850000e-02
  -8.3400000e-03
  -1.7900000e-02
   3.0300000e-02
   3.2820000e-02
   7.0770000e-02
   9.4870000e-02
   7.6470000e-02
   1.2311000e-01
   8.9440000e-02
   1.5623000e-01
   7.4470000e-02
   1.1447000e-01
   1.5502000e-01
   1.0117000e-01
   1.0320000e-01
   1.0131000e-01
   9.3520000e-02
   1.0899000e-01
   8.7630000e-02
   8.2280000e-02
   5.3790000e-02
   9.5960000e-02
   2.7660000e-02
   4.3430000e-02
   3.6820000e-02
  -2.3440000e-02
  -2.8500000e-03
  -3.5040000e-02
  -5.6450000e-02
  -6.5120000e-02
  -8.9770000e-02
  -1.2681000e-01
  -8.1460000e-02
  -1.0855000e-01
  -1.3440000e-01
  -1.0051000e-01
  -1.3084000e-01
  -1.1510000e-01
  -1.0943000e-01
  -1.1392000e-01
  -1.0175000e-01
  -4.8420000e-02
  -6.7890000e-02
  -2.5220000e-02
  -6.4700000e-03
  -2.2460000e-02
   3.2710000e-02
   2.4050000e-02
   6.8790000e-02
   4.8200000e-02
   8.0690000e-02
   9.4620000e-02
   1.1236000e-01
   1.2876000e-01
   1.0391000e-01
   1.2160000e-01
   1.4463000e-01
   1.3306000e-01
   1.2695000e-01
   9.2020000e-02
   1.1266000e-01
   8.1900000e-02
   7.9070000e-02
   8.6340000e-02
   4.6690000e-02
   1.0008000e-01
   2.5750000e-02
   5.5490000e-02
   3.9700000e-02
   1.3540000e-02
   2.5250000e-02
  -1.9850000e-02
  -1.0420000e-02
  -4.8480000e-02
  -5.4970000e-02
  -7.3650000e-02
  -9.1490000e-02
  -9.8650000e-02
  -1.2193000e-01
  -1.2431000e-01
  -1.4806000e-01
  -1.4293000e-01
  -1.3147000e-01
  -1.3805000e-01
  -1.1543000e-01
  -9.5910000e-02
  -7.7890000e-02
  -3.9040000e-02
  -4.1890000e-02
   4.6200000e-02
  -1.4010000e-02
   1.6780000e-02
   5.9800000e-02
   4.5510000e-02
   8.7550000e-02
   4.8390000e-02
   8.3050000e-02
   7.6880000e-02
   9.9200000e-02
   8.8070000e-02
   1.1258000e-01
   1.1642000e-01
   1.0556000e-01
   1.2640000e-01
   1.2393000e-01
   9.2700000e-02
   1.2780000e-01
   1.0731000e-01
   1.1167000e-01
   9.2970000e-02
   6.6350000e-02
   7.6300000e-02
   3.7400000e-02
   3.6360000e-02
   6.8300000e-03
  -2.1080000e-02
  -3.8660000e-02
  -4.2250000e-02
  -5.2940000e-02
  -9.0780000e-02
  -9.6570000e-02
  -9.9470000e-02
  -1.1066000e-01
  -1.1420000e-01
  -9.9140000e-02
  -1.1085000e-01
  -7.8140000e-02
  -1.0844000e-01
  -9.6900000e-02
  -8.2940000e-02
  -8.4530000e-02
  -7.2740000e-02
  -5.1600000e-02
  -4.9020000e-02
  -2.2240000e-02
   1.1730000e-02
   2.1880000e-02
   4.5430000e-02
   2.2810000e-02
   5.6590000e-02
   1.0490000e-01
   8.1240000e-02
   1.0836000e-01
   9.1820000e-02
   9.2120000e-02
   1.0959000e-01
   9.2540000e-02
   1.2714000e-01
   1.1337000e-01
   1.2947000e-01
   1.2497000e-01
   1.0770000e-01
   1.0243000e-01
   1.2738000e-01
   6.3910000e-02
   5.8700000e-02
   3.8630000e-02
   3.3640000e-02
   3.1830000e-02
   8.2000000e-04
  -1.4670000e-02
  -2.4810000e-02
  -3.7290000e-02
  -5.5690000e-02
  -6.7480000e-02
  -8.3900000e-02
  -9.4370000e-02
  -8.5710000e-02
  -1.2286000e-01
  -1.0413000e-01
  -1.2848000e-01
  -1.1713000e-01
  -1.0808000e-01
  -7.2930000e-02
  -9.4650000e-02
  -7.4250000e-02
  -6.0790000e-02
  -3.0900000e-02
  -3.8470000e-02
  -2.9360000e-02
  -4.0990000e-02
   2.6980000e-02
   7.2900000e-03
   4.2940000e-02
   5.4530000e-02
   9.2120000e-02
   1.0564000e-01
   9.1360000e-02
   1.1817000e-01
   1.3081000e-01
   1.1636000e-01
   1.2574000e-01
   1.0759000e-01
   1.4671000e-01
   1.0904000e-01
   1.3111000e-01
   8.7710000e-02
   1.0827000e-01
   8.4890000e-02
   6.2730000e-02
   7.5870000e-02
   2.9830000e-02
   3.2020000e-02
   1.5490000e-02
  -2.2730000e-02
  -4.5800000e-03
  -4.8150000e-02
  -4.6970000e-02
  -5.7140000e-02
  -8.4860000e-02
  -5.1440000e-02
  -1.0748000e-01
  -9.7610000e-02
  -1.2157000e-01
  -1.2434000e-01
  -1.1050000e-01
  -1.3251000e-01
  -1.1592000e-01
  -1.4501000e-01
  -6.6570000e-02
  -1.0013000e-01
  -7.9790000e-02
  -5.4750000e-02
  -2.3500000e-02
  -9.6200000e-03
  -6.5800000e-03
   3.4190000e-02
   1.9380000e-02
   6.3120000e-02
   6.6650000e-02
   8.6480000e-02
   9.1490000e-02
   8.3900000e-02
   1.4002000e-01
   1.1965000e-01
   9.0120000e-02
   1.4540000e-01
   1.2686000e-01
   9.4260000e-02
   9.9030000e-02
   8.5540000e-02
   1.1214000e-01
   8.8920000e-02
   7.7070000e-02
   7.6660000e-02
   5.0500000e-02
   7.4660000e-02
   4.3900000e-02
   1.8620000e-02
   2.1580000e-02
  -1.8510000e-02
   2.1410000e-02
  -5.7170000e-02
  -5.0830000e-02
  -1.0309000e-01
  -7.4190000e-02
  -1.0424000e-01
  -1.3605000e-01
  -1.3224000e-01
  -1.2982000e-01
  -1.3377000e-01
  -1.4307000e-01
  -1.3111000e-01
  -1.1222000e-01
  -9.5830000e-02
  -9.5960000e-02
  -9.5940000e-02
  -2.9830000e-02
  -4.7190000e-02
  -1.5110000e-02
   2.8730000e-02
   1.8070000e-02
   7.9980000e-02
   8.2720000e-02
   6.7340000e-02
   9.7660000e-02
   1.1241000e-01
   1.0890000e-01
   9.2840000e-02
   1.2440000e-01
   1.3660000e-01
   1.0320000e-01
   1.0649000e-01
   1.5003000e-01
   1.3558000e-01
   1.0581000e-01
   1.1642000e-01
   1.2355000e-01
   9.6870000e-02
   6.5360000e-02
   9.5910000e-02
   4.0170000e-02
   3.3830000e-02
   2.6300000e-03
  -1.4180000e-02
  -2.0810000e-02
  -6.6790000e-02
  -4.1260000e-02
  -9.7580000e-02
  -1.0748000e-01
  -1.0060000e-01
  -9.9390000e-02
  -1.1359000e-01
  -9.8070000e-02
  -1.4918000e-01
  -1.0726000e-01
  -1.1623000e-01
  -8.4060000e-02
  -9.4260000e-02
  -8.0530000e-02
  -6.9940000e-02
  -5.2730000e-02
  -2.4650000e-02
  -3.7340000e-02
  -3.6220000e-02
   1.3460000e-02
  -6.1700000e-03
   6.1440000e-02
   5.0450000e-02
   8.4560000e-02
   1.0158000e-01
   1.0534000e-01
   1.1636000e-01
   1.4707000e-01
   1.1107000e-01
   1.5190000e-01
   1.4444000e-01
   1.4118000e-01
   1.2322000e-01
   9.3080000e-02
   1.2360000e-01
   6.7480000e-02
   7.2490000e-02
   6.6460000e-02
   6.8520000e-02
   6.1250000e-02
   3.4680000e-02
   5.0610000e-02
   3.3000000e-04
   1.3600000e-02
  -3.1810000e-02
  -3.5840000e-02
  -4.8060000e-02
  -6.4020000e-02
  -5.7880000e-02
  -6.8350000e-02
  -1.1417000e-01
  -1.0657000e-01
  -1.2127000e-01
  -9.8180000e-02
  -1.5889000e-01
  -1.1055000e-01
  -1.2760000e-01
  -8.6750000e-02
  -9.0480000e-02
  -8.2940000e-02
  -7.6660000e-02
  -3.9620000e-02
  -1.8970000e-02
  -3.2980000e-02
  -8.3600000e-03
   3.9920000e-02
   1.5350000e-02
   8.6970000e-02
   4.9000000e-02
   1.1559000e-01
   1.1439000e-01
   1.2475000e-01
   1.4477000e-01
   1.1905000e-01
   1.5014000e-01
   1.3218000e-01
   1.5338000e-01
   1.4244000e-01
   1.1642000e-01
   1.2643000e-01
   1.0219000e-01
   8.1320000e-02
   9.7690000e-02
   4.8780000e-02
   6.1360000e-02
   2.4980000e-02
   4.2200000e-02
  -2.8050000e-02
  -3.1300000e-03
  -1.6040000e-02
  -6.1550000e-02
  -4.7650000e-02
  -6.2730000e-02
  -8.8620000e-02
  -6.0840000e-02
  -1.3152000e-01
  -9.4350000e-02
  -1.1746000e-01
  -1.3032000e-01
  -1.2492000e-01
  -1.2823000e-01
  -1.1995000e-01
  -1.0682000e-01
  -1.1126000e-01
  -6.5560000e-02
  -5.4860000e-02
  -2.4730000e-02
  -3.1280000e-02
   3.8600000e-02
   2.9720000e-02
   4.0830000e-02
   1.0529000e-01
   6.4320000e-02
   6.7340000e-02
   1.1379000e-01
   1.3481000e-01
   1.0175000e-01
   1.0175000e-01
   1.0106000e-01
   1.2966000e-01
   1.0005000e-01
   1.0685000e-01
   1.2675000e-01
   7.9650000e-02
   1.1126000e-01
   8.6750000e-02
   1.0370000e-01
   6.2570000e-02
   6.2490000e-02
   4.5790000e-02
   4.3290000e-02
   4.3240000e-02
   1.8320000e-02
   3.1060000e-02
  -1.0610000e-02
  -2.0260000e-02
  -5.4670000e-02
  -6.5560000e-02
  -7.0680000e-02
  -1.1529000e-01
  -1.1148000e-01
  -1.6234000e-01
  -1.1428000e-01
  -1.4241000e-01
  -1.4962000e-01
  -1.4244000e-01
  -1.1255000e-01
  -1.1077000e-01
  -8.4910000e-02
  -9.3410000e-02
  -3.9890000e-02
  -4.3300000e-03
  -5.4600000e-03
  -7.1600000e-03
   2.2920000e-02
   5.2310000e-02
   6.5560000e-02
   6.5450000e-02
   7.7460000e-02
   6.6270000e-02
   1.1606000e-01
   1.0561000e-01
   1.0175000e-01
   1.0175000e-01
   8.5080000e-02
   1.5398000e-01
   1.0391000e-01
   1.2988000e-01
   1.2478000e-01
   1.4707000e-01
   1.3495000e-01
   1.1074000e-01
   1.2080000e-01
   9.6810000e-02
   8.3350000e-02
   5.2920000e-02
   1.7160000e-02
   1.0860000e-02
   2.7100000e-03
  -3.6410000e-02
  -1.9170000e-02
  -1.1239000e-01
  -7.4770000e-02
  -8.7240000e-02
  -1.4778000e-01
  -1.4189000e-01
  -1.4246000e-01
  -1.4326000e-01
  -1.4447000e-01
  -1.5894000e-01
  -1.4123000e-01
  -1.0660000e-01
  -1.0186000e-01
  -1.0117000e-01
  -4.8970000e-02
  -5.3520000e-02
  -3.0350000e-02
   1.6090000e-02
   1.3960000e-02
   9.5100000e-03
   3.0740000e-02
   4.9630000e-02
   7.6770000e-02
   7.8800000e-02
   9.0320000e-02
   1.1461000e-01
   1.1642000e-01
   1.1230000e-01
   1.0422000e-01
   1.1612000e-01
   1.4773000e-01
   1.1675000e-01
   1.3931000e-01
   1.1620000e-01
   1.2988000e-01
   1.1047000e-01
   1.0161000e-01
   1.1760000e-01
   4.9600000e-02
   7.6830000e-02
   1.1380000e-02
   2.0560000e-02
   1.7680000e-02
  -3.4710000e-02
  -3.2930000e-02
  -7.8200000e-02
  -6.9830000e-02
  -9.7280000e-02
  -8.9160000e-02
  -1.2467000e-01
  -1.4011000e-01
  -1.0789000e-01
  -1.1995000e-01
  -1.4312000e-01
  -1.2292000e-01
  -1.1491000e-01
  -1.3002000e-01
  -1.0907000e-01
  -7.5670000e-02
  -6.0950000e-02
  -7.0550000e-02
  -3.8330000e-02
  -3.4600000e-02
  -2.4810000e-02
  -6.2000000e-03
   1.2310000e-02
   3.4740000e-02
   3.9430000e-02
   7.0900000e-02
   9.9090000e-02
   1.3517000e-01
   1.4334000e-01
   1.6042000e-01
   1.6064000e-01
   1.5774000e-01
   1.6190000e-01
   1.4008000e-01
   1.3695000e-01
   1.5757000e-01
   1.1513000e-01
   1.1762000e-01
   1.0337000e-01
   8.2090000e-02
   3.8520000e-02
   6.7390000e-02
   5.4340000e-02
  -8.4400000e-03
  -1.8210000e-02
  -1.7800000e-03
  -2.4900000e-02
  -7.8170000e-02
  -7.7370000e-02
  -9.8950000e-02
  -9.2180000e-02
  -1.0471000e-01
  -1.3152000e-01
  -1.1343000e-01
  -1.6215000e-01
  -1.3690000e-01
  -1.5338000e-01
  -1.4068000e-01
  -1.7742000e-01
  -1.2955000e-01
  -9.4700000e-02
  -9.6100000e-02
  -7.3780000e-02
  -5.2920000e-02
  -1.5980000e-02
   1.2120000e-02
   1.9030000e-02
   5.6590000e-02
   8.2800000e-02
   9.8240000e-02
   1.1357000e-01
   1.2250000e-01
   1.3213000e-01
   1.3761000e-01
   1.4466000e-01
   1.5127000e-01
   1.4477000e-01
   1.5061000e-01
   1.3860000e-01
   1.1335000e-01
   9.8510000e-02
   1.1941000e-01
   7.6740000e-02
   8.9030000e-02
   3.6690000e-02
   6.3250000e-02
   1.8420000e-02
   4.5050000e-02
   3.2680000e-02
  -9.1600000e-03
  -1.4920000e-02
  -2.9040000e-02
  -5.1570000e-02
  -4.0610000e-02
  -9.9470000e-02
  -1.0945000e-01
  -9.3190000e-02
  -1.2675000e-01
  -1.0655000e-01
  -1.5478000e-01
  -1.2407000e-01
  -1.2782000e-01
  -1.5390000e-01
  -1.1614000e-01
  -1.2281000e-01
  -9.9610000e-02
  -8.0500000e-02
  -7.6030000e-02
  -1.1080000e-02
  -2.8980000e-02
   1.5300000e-02
   3.9130000e-02
   4.3210000e-02
   9.3360000e-02
   1.0375000e-01
   8.8040000e-02
   1.3564000e-01
   1.1546000e-01
   1.3783000e-01
   1.5242000e-01
   1.1036000e-01
   1.1291000e-01
   1.1039000e-01
   1.2711000e-01
   1.2689000e-01
   8.1400000e-02
   1.2854000e-01
   9.9690000e-02
   9.7940000e-02
   8.9160000e-02
   6.6790000e-02
   8.7160000e-02
   4.4830000e-02
   4.9870000e-02
   3.0350000e-02
   7.1300000e-03
  -1.6890000e-02
  -3.1340000e-02
  -5.9800000e-02
  -6.1390000e-02
  -1.4230000e-01
  -1.0619000e-01
  -1.3227000e-01
  -1.2519000e-01
  -1.5406000e-01
  -1.5571000e-01
  -1.5563000e-01
  -1.5069000e-01
  -1.4142000e-01
  -1.1798000e-01
  -1.1203000e-01
  -6.1250000e-02
  -6.2680000e-02
  -2.6050000e-02
  -1.3130000e-02
   3.5180000e-02
   4.1620000e-02
   2.7250000e-02
   5.4150000e-02
   9.2400000e-02
   1.0268000e-01
   7.0140000e-02
   1.3191000e-01
   1.2371000e-01
   1.1672000e-01
   1.5291000e-01
   1.2404000e-01
   1.3717000e-01
   1.3468000e-01
   1.4669000e-01
   1.3641000e-01
   1.0372000e-01
   1.3218000e-01
   8.4530000e-02
   1.1184000e-01
   5.9550000e-02
   8.8670000e-02
   3.6410000e-02
   1.8370000e-02
   3.3500000e-02
   1.1680000e-02
  -4.1840000e-02
  -2.8300000e-02
  -5.9500000e-02
  -1.1140000e-01
  -1.2190000e-01
  -1.3728000e-01
  -1.4650000e-01
  -1.4416000e-01
  -1.8080000e-01
  -1.5560000e-01
  -1.3953000e-01
  -1.1867000e-01
  -1.4989000e-01
  -7.2850000e-02
  -1.3950000e-01
  -4.3900000e-02
  -6.7340000e-02
  -5.1770000e-02
  -1.7680000e-02
   1.1820000e-02
  -1.1500000e-03
   6.1030000e-02
   3.1040000e-02
   9.6700000e-02
   8.5870000e-02
   1.1376000e-01
   9.8730000e-02
   1.5722000e-01
   1.2379000e-01
   1.6818000e-01
   1.4493000e-01
   1.5497000e-01
   1.7676000e-01
   1.6670000e-01
   1.5667000e-01
   1.4625000e-01
   1.2511000e-01
   1.3188000e-01
   9.7990000e-02
   7.7980000e-02
   6.5260000e-02
   1.6830000e-02
   2.4210000e-02
   7.6500000e-03
  -3.5200000e-02
  -5.8590000e-02
  -6.5610000e-02
  -5.3380000e-02
  -8.2360000e-02
  -1.2300000e-01
  -1.4156000e-01
  -1.2286000e-01
  -1.8088000e-01
  -1.7435000e-01
  -1.7515000e-01
  -1.4630000e-01
  -1.5711000e-01
  -1.5955000e-01
  -1.0589000e-01
  -1.2039000e-01
  -6.1880000e-02
  -7.8090000e-02
  -6.6980000e-02
  -1.3160000e-02
   1.9520000e-02
   3.7340000e-02
   6.3360000e-02
   7.2410000e-02
   1.1595000e-01
   1.3394000e-01
   1.2766000e-01
   1.6040000e-01
   1.6001000e-01
   1.5924000e-01
   1.5135000e-01
   1.6629000e-01
   1.6651000e-01
   1.2401000e-01
   1.5269000e-01
   1.0874000e-01
   1.2034000e-01
   1.1987000e-01
   8.3210000e-02
   7.4910000e-02
   5.2400000e-02
   7.7240000e-02
   2.0450000e-02
   2.5800000e-03
  -2.0700000e-02
  -5.0150000e-02
  -1.8120000e-02
  -1.2058000e-01
  -1.0142000e-01
  -1.1431000e-01
  -1.2171000e-01
  -1.4622000e-01
  -1.2075000e-01
  -1.6349000e-01
  -1.7199000e-01
  -1.2972000e-01
  -1.6714000e-01
  -1.4022000e-01
  -1.2423000e-01
  -1.2067000e-01
  -5.5600000e-02
  -6.5720000e-02
  -3.8520000e-02
  -2.8500000e-03
   4.1000000e-04
   4.1290000e-02
   2.2700000e-02
   7.4360000e-02
   9.6050000e-02
   1.1494000e-01
   1.4310000e-01
   1.0690000e-01
   1.7241000e-01
   1.4252000e-01
   1.2407000e-01
   1.4984000e-01
   1.1211000e-01
   1.4002000e-01
   1.3227000e-01
   9.1330000e-02
   1.5730000e-01
   7.6960000e-02
   1.1370000e-01
   8.1840000e-02
   1.2209000e-01
   3.7730000e-02
   6.0620000e-02
   5.5660000e-02
   4.2200000e-02
  -5.2000000e-04
  -6.3940000e-02
  -4.6860000e-02
  -6.2730000e-02
  -1.2895000e-01
  -1.0827000e-01
  -1.1559000e-01
  -1.3665000e-01
  -1.3745000e-01
  -1.3183000e-01
  -1.5091000e-01
  -1.2725000e-01
  -1.4260000e-01
  -1.2725000e-01
  -1.3081000e-01
  -9.7610000e-02
  -1.0252000e-01
  -7.2160000e-02
  -6.7970000e-02
  -3.0820000e-02
  -1.7680000e-02
   6.0000000e-04
   4.3680000e-02
   8.3900000e-02
   5.6970000e-02
   1.1658000e-01
   1.2911000e-01
   1.5080000e-01
   1.1729000e-01
   1.7295000e-01
   1.1913000e-01
   1.5683000e-01
   1.5716000e-01
   1.2859000e-01
   1.6678000e-01
   9.7310000e-02
   1.0515000e-01
   1.4896000e-01
   1.0559000e-01
   5.3030000e-02
   1.2154000e-01
   4.2740000e-02
   3.5010000e-02
   2.5660000e-02
   5.6200000e-03
   6.5000000e-03
  -3.8300000e-02
  -5.5990000e-02
  -4.1430000e-02
  -5.5880000e-02
  -9.3960000e-02
  -1.4293000e-01
  -1.0049000e-01
  -1.4907000e-01
  -1.6105000e-01
  -1.4499000e-01
  -1.6341000e-01
  -1.3742000e-01
  -1.2848000e-01
  -1.4312000e-01
  -8.5760000e-02
  -1.0123000e-01
  -7.2330000e-02
  -5.1570000e-02
  -1.9990000e-02
  -1.6860000e-02
   5.1500000e-03
   3.0680000e-02
   3.3890000e-02
   9.2540000e-02
   8.9930000e-02
   1.0221000e-01
   1.1118000e-01
   1.2124000e-01
   1.7405000e-01
   1.5266000e-01
   1.4367000e-01
   1.6484000e-01
   1.4611000e-01
   1.7482000e-01
   1.2629000e-01
   1.2736000e-01
   1.1836000e-01
   1.1710000e-01
   1.2135000e-01
   6.3640000e-02
   6.7590000e-02
   5.0890000e-02
   3.1640000e-02
   1.5850000e-02
  -1.6560000e-02
  -2.1100000e-03
  -9.2650000e-02
  -3.5750000e-02
  -9.9420000e-02
  -1.0235000e-01
  -1.3380000e-01
  -1.3904000e-01
  -1.2889000e-01
  -2.0739000e-01
  -1.5952000e-01
  -1.7295000e-01
  -1.6843000e-01
  -1.2185000e-01
  -1.3553000e-01
  -8.0610000e-02
  -8.6390000e-02
  -7.3260000e-02
  -1.5960000e-02
  -2.3660000e-02
  -2.0590000e-02
   4.8340000e-02
   3.4460000e-02
   7.2360000e-02
   8.5190000e-02
   1.2972000e-01
   1.1719000e-01
   1.1814000e-01
   1.3292000e-01
   1.5255000e-01
   1.2643000e-01
   1.3103000e-01
   1.5648000e-01
   1.5694000e-01
   1.5264000e-01
   1.3808000e-01
   1.1414000e-01
   1.3342000e-01
   1.2201000e-01
   1.0819000e-01
   9.1490000e-02
   7.2080000e-02
   6.2430000e-02
   3.8770000e-02
  -9.5700000e-03
  -1.2640000e-02
  -8.2360000e-02
  -5.4120000e-02
  -1.0710000e-01
  -1.1008000e-01
  -1.3314000e-01
  -1.2516000e-01
  -1.6873000e-01
  -1.7655000e-01
  -1.5787000e-01
  -1.7103000e-01
  -1.5066000e-01
  -1.5297000e-01
  -1.4529000e-01
  -1.1091000e-01
  -8.7130000e-02
  -9.5660000e-02
  -5.2590000e-02
  -6.0160000e-02
  -1.5030000e-02
   2.1500000e-02
   1.4700000e-02
   4.0250000e-02
   8.7190000e-02
   9.2450000e-02
   8.3820000e-02
   1.4617000e-01
   1.2610000e-01
   1.6720000e-01
   1.5497000e-01
   1.5837000e-01
   1.8310000e-01
   1.2887000e-01
   1.7531000e-01
   1.7885000e-01
   1.0205000e-01
   1.5458000e-01
   1.2519000e-01
   1.0016000e-01
   1.0572000e-01
   5.8150000e-02
   7.3260000e-02
   4.0220000e-02
   2.8510000e-02
   7.7300000e-03
  -4.2280000e-02
  -2.9470000e-02
  -4.8800000e-02
  -8.4670000e-02
  -9.1880000e-02
  -1.6007000e-01
  -7.9590000e-02
  -1.7309000e-01
  -1.8713000e-01
  -1.4233000e-01
  -1.7923000e-01
  -1.4614000e-01
  -1.8137000e-01
  -1.4888000e-01
  -1.5346000e-01
  -7.5730000e-02
  -1.4603000e-01
  -3.5100000e-02
  -6.4510000e-02
  -2.2320000e-02
   2.0560000e-02
   3.4250000e-02
   4.0060000e-02
   1.1480000e-01
   1.0869000e-01
   1.3811000e-01
   1.2004000e-01
   2.0569000e-01
   1.5121000e-01
   1.9917000e-01
   1.5727000e-01
   1.2483000e-01
   1.9154000e-01
   1.2785000e-01
   1.3413000e-01
   1.2165000e-01
   1.0836000e-01
   1.2228000e-01
   8.6260000e-02
   8.7710000e-02
   5.8570000e-02
   6.1470000e-02
   6.6600000e-03
   2.3550000e-02
  -3.9350000e-02
  -3.7040000e-02
  -4.6140000e-02
  -9.2540000e-02
  -7.7290000e-02
  -1.1713000e-01
  -1.0731000e-01
  -1.2390000e-01
  -1.4518000e-01
  -1.4194000e-01
  -1.4438000e-01
  -1.3465000e-01
  -1.6508000e-01
  -1.2738000e-01
  -9.5090000e-02
  -1.5170000e-01
  -8.8230000e-02
  -9.6900000e-02
  -7.3730000e-02
  -2.0450000e-02
  -4.5950000e-02
   2.2620000e-02
   2.1060000e-02
   6.3010000e-02
   8.3490000e-02
   1.1433000e-01
   1.0213000e-01
   1.3912000e-01
   1.6026000e-01
   1.4929000e-01
   1.3827000e-01
   1.7449000e-01
   1.6796000e-01
   1.5102000e-01
   1.4995000e-01
   1.2889000e-01
   1.3046000e-01
   1.3100000e-01
   7.0520000e-02
   1.0731000e-01
   8.7770000e-02
   5.6400000e-02
   6.3690000e-02
   6.7400000e-03
   5.7410000e-02
  -6.1700000e-03
   2.8000000e-03
  -3.5370000e-02
  -5.8070000e-02
  -4.3680000e-02
  -1.0186000e-01
  -1.1831000e-01
  -1.5913000e-01
  -1.4765000e-01
  -1.4518000e-01
  -2.0443000e-01
  -1.8140000e-01
  -1.9256000e-01
  -1.6884000e-01
  -1.6295000e-01
  -1.4367000e-01
  -1.1491000e-01
  -7.1860000e-02
  -4.1890000e-02
  -3.2520000e-02
   2.2240000e-02
   1.4500000e-02
   6.6600000e-02
   6.6380000e-02
   5.5440000e-02
   9.7170000e-02
   1.4652000e-01
   1.1551000e-01
   1.3454000e-01
   1.4386000e-01
   1.4279000e-01
   1.5414000e-01
   1.2574000e-01
   1.4581000e-01
   1.2475000e-01
   1.4559000e-01
   1.5409000e-01
   1.4055000e-01
   1.1872000e-01
   1.4400000e-01
   9.8710000e-02
   9.8760000e-02
   2.5690000e-02
   6.1880000e-02
   4.6100000e-03
   1.1630000e-02
   2.6300000e-03
  -6.5780000e-02
  -8.1240000e-02
  -6.8380000e-02
  -1.3564000e-01
  -1.5371000e-01
  -1.4611000e-01
  -1.7334000e-01
  -1.6385000e-01
  -1.8510000e-01
  -1.6665000e-01
  -1.4540000e-01
  -1.7268000e-01
  -1.5009000e-01
  -1.2895000e-01
  -1.2420000e-01
  -7.4580000e-02
  -8.3080000e-02
  -2.8050000e-02
  -1.1190000e-02
  -4.7000000e-04
   6.3580000e-02
   7.8740000e-02
   9.0730000e-02
   1.0460000e-01
   1.2078000e-01
   1.6975000e-01
   1.5223000e-01
   1.7391000e-01
   1.5467000e-01
   1.7358000e-01
   1.5848000e-01
   1.4052000e-01
   1.8082000e-01
   1.3906000e-01
   1.4288000e-01
   1.4126000e-01
   1.0002000e-01
   1.3597000e-01
   8.9160000e-02
   6.5470000e-02
   5.0310000e-02
   6.7260000e-02
  -1.8400000e-03
   1.3700000e-03
  -5.4300000e-03
  -1.8700000e-02
  -4.1370000e-02
  -1.0929000e-01
  -1.3174000e-01
  -1.3021000e-01
  -1.6325000e-01
  -1.6552000e-01
  -1.7915000e-01
  -2.0218000e-01
  -1.8650000e-01
  -1.4655000e-01
  -1.8080000e-01
  -1.3479000e-01
  -1.1875000e-01
  -1.2069000e-01
  -6.0050000e-02
  -8.0800000e-02
  -2.3720000e-02
  -1.2910000e-02
   8.5500000e-03
   4.2440000e-02
   5.8570000e-02
   8.8920000e-02
   8.1620000e-02
   1.5017000e-01
   1.1000000e-01
   1.7071000e-01
   1.5828000e-01
   1.6473000e-01
   2.1817000e-01
   1.4386000e-01
   1.7846000e-01
   1.8186000e-01
   1.5195000e-01
   1.5159000e-01
   1.3909000e-01
   1.4071000e-01
   1.0123000e-01
   1.2294000e-01
   5.5060000e-02
   5.1050000e-02
   2.9390000e-02
  -2.4350000e-02
  -1.8590000e-02
  -8.3600000e-02
  -8.7240000e-02
  -8.7820000e-02
  -8.3350000e-02
  -1.0293000e-01
  -1.4310000e-01
  -1.3610000e-01
  -1.6119000e-01
  -1.6278000e-01
  -2.0509000e-01
  -1.8908000e-01
  -1.7051000e-01
  -1.5867000e-01
  -1.5848000e-01
  -1.4715000e-01
  -1.1170000e-01
  -8.5110000e-02
  -1.0394000e-01
  -3.4140000e-02
  -2.3940000e-02
   2.8460000e-02
   3.9700000e-02
   7.0270000e-02
   9.0230000e-02
   1.1362000e-01
   1.5253000e-01
   1.4940000e-01
   1.5669000e-01
   1.7937000e-01
   1.7454000e-01
   1.6429000e-01
   1.9788000e-01
   1.7487000e-01
   1.5993000e-01
   1.5439000e-01
   1.1757000e-01
   1.5798000e-01
   8.4450000e-02
   1.0268000e-01
   8.7900000e-02
   8.4040000e-02
   3.6630000e-02
   3.1940000e-02
   3.6660000e-02
   3.9810000e-02
  -3.6360000e-02
  -3.7650000e-02
  -7.5400000e-02
  -1.0156000e-01
  -1.2601000e-01
  -1.9574000e-01
  -1.6136000e-01
  -1.9165000e-01
  -1.9541000e-01
  -2.0528000e-01
  -2.0646000e-01
  -1.9119000e-01
  -1.7479000e-01
  -1.6229000e-01
  -1.5754000e-01
  -1.2955000e-01
  -5.7520000e-02
  -8.8200000e-02
  -2.4270000e-02
  -3.2380000e-02
   2.7140000e-02
   7.4500000e-02
   7.9570000e-02
   1.2303000e-01
   1.2193000e-01
   1.7635000e-01
   1.7737000e-01
   1.3427000e-01
   2.0270000e-01
   1.5606000e-01
   1.6580000e-01
   1.8480000e-01
   1.5982000e-01
   1.8175000e-01
   1.6360000e-01
   1.5132000e-01
   1.4707000e-01
   1.0863000e-01
   9.8920000e-02
   9.6590000e-02
   4.7320000e-02
   8.0120000e-02
   2.2570000e-02
   4.6780000e-02
  -2.0480000e-02
  -1.2720000e-02
  -6.0650000e-02
  -6.2980000e-02
  -9.7170000e-02
  -1.2766000e-01
  -1.5949000e-01
  -1.9807000e-01
  -1.6766000e-01
  -2.2094000e-01
  -2.2582000e-01
  -2.2214000e-01
  -2.2595000e-01
  -1.8877000e-01
  -1.7345000e-01
  -1.4510000e-01
  -8.6010000e-02
  -9.9450000e-02
  -3.8690000e-02
  -9.4000000e-03
   2.7640000e-02
   6.7890000e-02
   6.9700000e-02
   8.7410000e-02
   1.8236000e-01
   1.1488000e-01
   1.7633000e-01
   1.6314000e-01
   1.4534000e-01
   1.7923000e-01
   1.6168000e-01
   1.4973000e-01
   1.6733000e-01
   1.4619000e-01
   1.6319000e-01
   1.5530000e-01
   1.2242000e-01
   1.6382000e-01
   1.3808000e-01
   9.9530000e-02
   9.8270000e-02
   9.3550000e-02
   4.9460000e-02
   4.2090000e-02
  -2.5000000e-03
  -3.1970000e-02
  -4.4340000e-02
  -7.9350000e-02
  -1.1458000e-01
  -1.0243000e-01
  -1.8389000e-01
  -1.2283000e-01
  -1.8340000e-01
  -1.8260000e-01
  -2.1808000e-01
  -1.8705000e-01
  -1.9826000e-01
  -1.7501000e-01
  -1.8439000e-01
  -1.4850000e-01
  -1.0753000e-01
  -6.7780000e-02
  -8.0280000e-02
  -3.6220000e-02
  -2.3060000e-02
   2.9690000e-02
   2.9470000e-02
   3.0980000e-02
   8.6120000e-02
   9.4020000e-02
   1.5365000e-01
   1.4268000e-01
   1.6827000e-01
   1.5801000e-01
   1.8014000e-01
   1.8639000e-01
   1.5483000e-01
   1.5859000e-01
   1.4726000e-01
   1.8326000e-01
   1.4419000e-01
   1.4019000e-01
   1.3860000e-01
   1.2091000e-01
   1.2160000e-01
   5.7960000e-02
   6.9310000e-02
   8.2360000e-02
   1.5520000e-02
   4.3160000e-02
  -5.0860000e-02
  -4.3320000e-02
  -6.4020000e-02
  -8.2200000e-02
  -1.3336000e-01
  -1.4013000e-01
  -1.5505000e-01
  -1.6182000e-01
  -1.5595000e-01
  -2.1959000e-01
  -1.6736000e-01
  -2.0736000e-01
  -1.8365000e-01
  -1.7208000e-01
  -1.2593000e-01
  -1.5867000e-01
  -6.0540000e-02
  -8.0090000e-02
  -5.1410000e-02
  -2.9610000e-02
  -3.8850000e-02
   4.0110000e-02
   6.3910000e-02
   5.4040000e-02
   1.1387000e-01
   1.0858000e-01
   1.5195000e-01
   1.6190000e-01
   1.6807000e-01
   1.6292000e-01
   1.7405000e-01
   1.8088000e-01
   1.8151000e-01
   1.4926000e-01
   1.7306000e-01
   1.7092000e-01
   1.5036000e-01
   1.3402000e-01
   1.5645000e-01
   1.2094000e-01
   1.0062000e-01
   7.4600000e-02
   7.6220000e-02
   2.8270000e-02
   1.0640000e-02
  -3.1010000e-02
  -4.0170000e-02
  -7.8850000e-02
  -9.1380000e-02
  -1.0394000e-01
  -1.3358000e-01
  -1.6360000e-01
  -1.5604000e-01
  -1.8644000e-01
  -2.0199000e-01
  -2.0336000e-01
  -2.1523000e-01
  -2.0054000e-01
  -1.9730000e-01
  -1.8705000e-01
  -1.2031000e-01
  -1.1880000e-01
  -1.3046000e-01
  -5.2860000e-02
  -4.0740000e-02
   2.8380000e-02
   3.7950000e-02
   6.1060000e-02
   9.5420000e-02
   1.1617000e-01
   1.7912000e-01
   1.5368000e-01
   1.5694000e-01
   1.8938000e-01
   1.9204000e-01
   2.2187000e-01
   1.4170000e-01
   2.0712000e-01
   2.0788000e-01
   1.3481000e-01
   1.8565000e-01
   1.2442000e-01
   1.3358000e-01
   1.2171000e-01
   1.0367000e-01
   9.4260000e-02
   6.0540000e-02
   6.2070000e-02
   3.5370000e-02
  -1.6000000e-04
  -2.8270000e-02
  -6.1860000e-02
  -5.0200000e-02
  -1.2218000e-01
  -1.2341000e-01
  -1.6593000e-01
  -1.7260000e-01
  -1.7712000e-01
  -2.0240000e-01
  -2.1693000e-01
  -2.2560000e-01
  -1.9237000e-01
  -1.8831000e-01
  -1.7024000e-01
  -1.3909000e-01
  -1.3536000e-01
  -5.8320000e-02
  -1.0019000e-01
  -1.0170000e-02
  -2.7500000e-02
   2.0450000e-02
   7.4580000e-02
   6.4430000e-02
   1.1740000e-01
   1.2577000e-01
   1.1269000e-01
   1.9900000e-01
   1.1812000e-01
   1.6467000e-01
   1.8178000e-01
   1.5187000e-01
   2.0394000e-01
   1.6215000e-01
   1.8143000e-01
   1.7715000e-01
   1.4153000e-01
   1.6821000e-01
   1.0770000e-01
   1.1839000e-01
   1.2470000e-01
   7.4660000e-02
   6.3500000e-02
   3.6630000e-02
   2.2320000e-02
  -5.4000000e-03
  -1.7050000e-02
  -1.0474000e-01
  -5.2150000e-02
  -1.1244000e-01
  -1.4743000e-01
  -1.0652000e-01
  -2.2933000e-01
  -1.6607000e-01
  -2.0657000e-01
  -1.9269000e-01
  -1.9124000e-01
  -1.9530000e-01
  -1.7934000e-01
  -1.3915000e-01
  -1.3682000e-01
  -1.3325000e-01
  -9.2100000e-02
  -5.0500000e-02
  -6.2050000e-02
  -1.6000000e-04
   8.5000000e-04
   3.3860000e-02
   4.3460000e-02
   7.1180000e-02
   1.5404000e-01
   9.0320000e-02
   1.9752000e-01
   1.5974000e-01
   1.9187000e-01
   1.5458000e-01
   1.6997000e-01
   2.2897000e-01
   1.3813000e-01
   1.4713000e-01
   2.0643000e-01
   1.8707000e-01
   1.4293000e-01
   1.2239000e-01
   1.3481000e-01
   1.0243000e-01
   7.3100000e-02
   3.3560000e-02
   4.0830000e-02
   1.6420000e-02
  -6.0900000e-03
  -3.9800000e-03
  -7.7130000e-02
  -9.7140000e-02
  -1.1664000e-01
  -1.3885000e-01
  -1.3745000e-01
  -1.9703000e-01
  -1.9039000e-01
  -1.9193000e-01
  -2.1575000e-01
  -2.1775000e-01
  -2.1425000e-01
  -1.9928000e-01
  -1.6569000e-01
  -1.6081000e-01
  -1.3586000e-01
  -6.2870000e-02
  -7.4990000e-02
  -4.9980000e-02
  -3.0960000e-02
   1.3630000e-02
   3.6990000e-02
   6.6570000e-02
   1.0189000e-01
   1.4707000e-01
   1.5428000e-01
   1.6774000e-01
   1.8513000e-01
   2.1669000e-01
   1.6423000e-01
   1.8340000e-01
   1.8115000e-01
   1.8016000e-01
   1.6064000e-01
   1.7432000e-01
   1.8790000e-01
   1.4082000e-01
   1.4370000e-01
   1.4693000e-01
   1.2708000e-01
   8.0830000e-02
   6.4100000e-02
   4.1920000e-02
   1.7960000e-02
  -4.1700000e-03
  -5.4620000e-02
  -6.2430000e-02
  -8.0550000e-02
  -1.2590000e-01
  -1.3879000e-01
  -1.7545000e-01
  -1.9223000e-01
  -1.7674000e-01
  -2.1902000e-01
  -2.1504000e-01
  -2.0550000e-01
  -2.1644000e-01
  -1.7967000e-01
  -1.5839000e-01
  -1.6240000e-01
  -1.0065000e-01
  -9.0450000e-02
  -5.1440000e-02
   4.8500000e-03
  -1.0390000e-02
   5.0010000e-02
   4.0170000e-02
   1.2111000e-01
   8.0940000e-02
   1.2163000e-01
   1.6492000e-01
   1.4603000e-01
   1.7899000e-01
   1.7243000e-01
   1.9585000e-01
   1.8513000e-01
   1.7613000e-01
   2.0147000e-01
   1.6791000e-01
   1.2766000e-01
   1.6270000e-01
   1.4463000e-01
   9.5690000e-02
   1.2643000e-01
   9.5280000e-02
   7.6830000e-02
   6.3120000e-02
   3.4790000e-02
   3.3180000e-02
  -7.2900000e-03
  -3.7510000e-02
  -6.4020000e-02
  -6.4510000e-02
  -1.2558000e-01
  -1.3904000e-01
  -1.2201000e-01
  -1.9302000e-01
  -1.7890000e-01
  -1.9075000e-01
  -2.3434000e-01
  -1.8485000e-01
  -2.2072000e-01
  -1.7959000e-01
  -1.5434000e-01
  -1.6657000e-01
  -1.1261000e-01
  -8.9680000e-02
  -7.1010000e-02
  -4.7320000e-02
  -4.1400000e-02
   2.8130000e-02
   3.5840000e-02
   6.2050000e-02
   1.0348000e-01
   1.4781000e-01
   1.4076000e-01
   1.8206000e-01
   1.8749000e-01
   1.8949000e-01
   2.0969000e-01
   1.7945000e-01
   2.3884000e-01
   1.8044000e-01
   1.7131000e-01
   1.8518000e-01
   1.7295000e-01
   1.4493000e-01
   7.9730000e-02
   1.2785000e-01
   1.1403000e-01
   6.0020000e-02
   8.7900000e-02
   2.4460000e-02
   1.3980000e-02
  -1.8320000e-02
  -4.2440000e-02
  -5.5550000e-02
  -7.7790000e-02
  -1.3243000e-01
  -1.3920000e-01
  -1.5853000e-01
  -1.9919000e-01
  -1.7970000e-01
  -2.1471000e-01
  -2.1647000e-01
  -2.1655000e-01
  -2.1104000e-01
  -1.9889000e-01
  -1.6909000e-01
  -1.8274000e-01
  -1.1516000e-01
  -9.0640000e-02
  -7.2550000e-02
  -2.2290000e-02
  -2.1550000e-02
   4.2110000e-02
   5.5380000e-02
   1.0131000e-01
   1.1362000e-01
   1.1085000e-01
   1.6585000e-01
   1.7517000e-01
   1.5491000e-01
   1.7844000e-01
   1.8222000e-01
   1.8356000e-01
   1.6503000e-01
   2.0766000e-01
   1.8642000e-01
   2.0284000e-01
   1.8310000e-01
   1.7729000e-01
   1.7202000e-01
   1.1431000e-01
   1.4027000e-01
   8.6260000e-02
   3.7670000e-02
   3.6380000e-02
  -1.5380000e-02
  -1.7880000e-02
  -7.7020000e-02
  -8.0580000e-02
  -9.4320000e-02
  -1.4586000e-01
  -1.3750000e-01
  -1.9439000e-01
  -1.7597000e-01
  -2.0522000e-01
  -1.9226000e-01
  -2.0758000e-01
  -2.0418000e-01
  -1.9467000e-01
  -1.9755000e-01
  -1.8058000e-01
  -1.6651000e-01
  -1.6887000e-01
  -9.2070000e-02
  -1.1159000e-01
  -3.9400000e-02
   1.2580000e-02
  -7.4600000e-03
   7.5730000e-02
   9.8600000e-02
   1.0504000e-01
   1.5864000e-01
   1.6997000e-01
   2.0714000e-01
   1.9947000e-01
   1.8960000e-01
   2.0300000e-01
   2.0772000e-01
   1.7391000e-01
   1.7060000e-01
   1.6338000e-01
   2.0163000e-01
   1.3347000e-01
   1.6243000e-01
   1.5820000e-01
   1.1469000e-01
   1.0512000e-01
   7.7950000e-02
   5.5710000e-02
   4.2000000e-02
   1.6290000e-02
   2.3550000e-02
  -5.4480000e-02
  -4.0470000e-02
  -8.3980000e-02
  -1.2681000e-01
  -1.5321000e-01
  -1.7844000e-01
  -2.0775000e-01
  -2.1230000e-01
  -2.3892000e-01
  -2.6245000e-01
  -2.3166000e-01
  -2.2784000e-01
  -1.9245000e-01
  -1.7822000e-01
  -1.4814000e-01
  -1.0112000e-01
  -7.2990000e-02
  -5.5470000e-02
  -1.4390000e-02
  -9.0200000e-03
   4.1840000e-02
   6.3340000e-02
   1.2527000e-01
   1.2086000e-01
   1.2604000e-01
   2.0394000e-01
   1.6950000e-01
   1.6062000e-01
   2.1323000e-01
   2.0103000e-01
   1.6476000e-01
   2.0202000e-01
   1.7260000e-01
   1.7564000e-01
   1.6133000e-01
   1.6807000e-01
   1.4957000e-01
   1.1680000e-01
   1.1850000e-01
   1.0954000e-01
   6.7720000e-02
   8.6480000e-02
   7.7000000e-03
   2.6380000e-02
  -5.6920000e-02
  -5.2200000e-02
  -3.1830000e-02
  -1.2829000e-01
  -9.9690000e-02
  -1.7101000e-01
  -1.8011000e-01
  -1.9675000e-01
  -2.0731000e-01
  -2.1466000e-01
  -2.5085000e-01
  -2.0495000e-01
  -2.1293000e-01
  -1.9412000e-01
  -1.9300000e-01
  -1.6758000e-01
  -1.0561000e-01
  -8.0250000e-02
  -6.7040000e-02
  -9.9800000e-03
   1.3050000e-02
   6.0210000e-02
   8.8070000e-02
   5.2530000e-02
   1.3896000e-01
   1.2371000e-01
   1.8439000e-01
   1.8027000e-01
   1.5584000e-01
   2.0457000e-01
   1.9903000e-01
   2.1068000e-01
   1.8559000e-01
   1.7386000e-01
   1.7405000e-01
   1.7279000e-01
   1.5626000e-01
   1.6492000e-01
   1.6185000e-01
   1.1825000e-01
   1.1839000e-01
   1.1510000e-01
   4.9790000e-02
   3.0300000e-02
   1.5960000e-02
  -2.5990000e-02
  -4.4690000e-02
  -1.0232000e-01
  -1.1998000e-01
  -1.3375000e-01
  -1.8784000e-01
  -1.8603000e-01
  -1.6887000e-01
  -2.2343000e-01
  -2.1904000e-01
  -2.4512000e-01
  -2.0193000e-01
  -2.1134000e-01
  -1.8126000e-01
  -1.8313000e-01
  -1.5047000e-01
  -1.0219000e-01
  -7.2770000e-02
  -8.8700000e-02
  -1.3540000e-02
  -3.8000000e-02
   3.9650000e-02
   4.5020000e-02
   6.3910000e-02
   1.1538000e-01
   1.4836000e-01
   1.6215000e-01
   1.9069000e-01
   1.9078000e-01
   2.2760000e-01
   2.4032000e-01
   2.1008000e-01
   2.4065000e-01
   2.0210000e-01
   2.2439000e-01
   1.7679000e-01
   1.8233000e-01
   1.7230000e-01
   1.2621000e-01
   1.2785000e-01
   9.9750000e-02
   9.1930000e-02
   7.9180000e-02
   4.9400000e-03
   7.8700000e-03
  -2.7610000e-02
  -4.9870000e-02
  -6.6930000e-02
  -9.5580000e-02
  -1.4608000e-01
  -1.2316000e-01
  -1.9673000e-01
  -1.7748000e-01
  -2.1496000e-01
  -2.3519000e-01
  -2.3330000e-01
  -2.3229000e-01
  -2.1575000e-01
  -2.2927000e-01
  -2.0300000e-01
  -1.6410000e-01
  -1.2939000e-01
  -1.1496000e-01
  -6.2920000e-02
  -4.5510000e-02
   2.5720000e-02
   6.5670000e-02
   6.6960000e-02
   1.1126000e-01
   1.6144000e-01
   1.3950000e-01
   1.8773000e-01
   1.8496000e-01
   1.7712000e-01
   2.0366000e-01
   2.1370000e-01
   2.0152000e-01
   2.0671000e-01
   1.8557000e-01
   2.0618000e-01
   1.7493000e-01
   1.3865000e-01
   2.0468000e-01
   1.5944000e-01
   1.2925000e-01
   1.1069000e-01
   1.1732000e-01
   6.4240000e-02
   4.1290000e-02
   2.4160000e-02
  -5.3990000e-02
  -7.7400000e-02
  -7.4110000e-02
  -1.1507000e-01
  -1.5390000e-01
  -1.8239000e-01
  -2.0062000e-01
  -2.1364000e-01
  -2.3193000e-01
  -2.7012000e-01
  -2.4981000e-01
  -2.1699000e-01
  -2.4372000e-01
  -1.9069000e-01
  -1.8398000e-01
  -1.5949000e-01
  -1.2366000e-01
  -7.5130000e-02
  -6.3970000e-02
  -2.3740000e-02
   3.6380000e-02
   3.0680000e-02
   1.3503000e-01
   7.9050000e-02
   1.6278000e-01
   1.7205000e-01
   1.8960000e-01
   1.9387000e-01
   1.9135000e-01
   2.0882000e-01
   2.3270000e-01
   1.8367000e-01
   1.9642000e-01
   1.9012000e-01
   1.7583000e-01
   1.5546000e-01
   1.3158000e-01
   1.6807000e-01
   1.0608000e-01
   1.3185000e-01
   8.9160000e-02
   5.3930000e-02
   8.9160000e-02
   2.8820000e-02
   1.1240000e-02
  -1.0560000e-02
  -7.1370000e-02
  -5.0810000e-02
  -1.3460000e-01
  -1.4482000e-01
  -1.9453000e-01
  -1.9020000e-01
  -2.2025000e-01
  -2.5258000e-01
  -2.4369000e-01
  -2.2774000e-01
  -2.3626000e-01
  -2.0509000e-01
  -1.8573000e-01
  -1.6306000e-01
  -1.2009000e-01
  -1.0435000e-01
  -8.3410000e-02
  -4.3320000e-02
  -1.2280000e-02
   1.5960000e-02
   3.1810000e-02
   8.3300000e-02
   8.4010000e-02
   1.5064000e-01
   1.7616000e-01
   1.5425000e-01
   1.7188000e-01
   1.9851000e-01
   1.9193000e-01
   2.1924000e-01
   1.8973000e-01
   2.0141000e-01
   2.0649000e-01
   1.8329000e-01
   2.1589000e-01
   1.7139000e-01
   1.5113000e-01
   1.4575000e-01
   1.3512000e-01
   9.6320000e-02
   8.3160000e-02
   3.9290000e-02
   4.0090000e-02
  -2.2510000e-02
  -5.6590000e-02
  -5.5800000e-02
  -8.8730000e-02
  -1.4271000e-01
  -1.5236000e-01
  -1.7224000e-01
  -1.7923000e-01
  -2.3429000e-01
  -2.2077000e-01
  -2.5800000e-01
  -2.1751000e-01
  -2.2324000e-01
  -2.4421000e-01
  -1.9974000e-01
  -1.7764000e-01
  -1.3471000e-01
  -8.8200000e-02
  -1.0677000e-01
  -4.9000000e-02
  -1.8400000e-02
   2.3500000e-02
   4.0990000e-02
   5.5930000e-02
   1.2020000e-01
   1.4140000e-01
   1.4677000e-01
   2.0750000e-01
   1.8107000e-01
   2.0136000e-01
   2.1419000e-01
   2.1984000e-01
   2.0188000e-01
   2.1455000e-01
   2.3124000e-01
   2.0002000e-01
   1.9788000e-01
   1.8524000e-01
   1.7271000e-01
   1.3065000e-01
   1.0869000e-01
   9.3630000e-02
   5.1880000e-02
   4.5290000e-02
   9.5400000e-03
  -5.4600000e-03
  -4.2310000e-02
  -7.0080000e-02
  -1.0010000e-01
  -1.1727000e-01
  -1.5924000e-01
  -1.7929000e-01
  -1.9738000e-01
  -1.9651000e-01
  -2.4106000e-01
  -2.3464000e-01
  -2.1696000e-01
  -2.5315000e-01
  -2.1345000e-01
  -2.1559000e-01
  -1.6256000e-01
  -1.4411000e-01
  -1.4946000e-01
  -7.9050000e-02
  -4.5930000e-02
  -4.5240000e-02
   1.7190000e-02
   3.1780000e-02
   1.0592000e-01
   1.2667000e-01
   1.5395000e-01
   1.9174000e-01
   2.1126000e-01
   2.0300000e-01
   2.2817000e-01
   2.6102000e-01
   2.0747000e-01
   1.9733000e-01
   2.2198000e-01
   2.2168000e-01
   1.8258000e-01
   1.7679000e-01
   1.4883000e-01
   1.7282000e-01
   1.5727000e-01
   1.3131000e-01
   7.5350000e-02
   8.6260000e-02
   7.0930000e-02
   1.0060000e-02
  -5.2000000e-04
  -5.2230000e-02
  -6.1690000e-02
  -1.0211000e-01
  -1.2388000e-01
  -1.5017000e-01
  -1.8145000e-01
  -2.2094000e-01
  -2.0980000e-01
  -2.3939000e-01
  -2.3355000e-01
  -2.8496000e-01
  -2.5570000e-01
  -2.2170000e-01
  -2.4314000e-01
  -1.6591000e-01
  -1.6635000e-01
  -1.1735000e-01
  -3.9260000e-02
  -8.8640000e-02
   1.1160000e-02
   7.3320000e-02
   3.1610000e-02
   1.3078000e-01
   1.1598000e-01
   1.7572000e-01
   1.7375000e-01
   1.8189000e-01
   2.2132000e-01
   2.0287000e-01
   2.2617000e-01
   2.1737000e-01
   2.3925000e-01
   1.7468000e-01
   2.2009000e-01
   1.9174000e-01
   1.5971000e-01
   1.7065000e-01
   1.1156000e-01
   1.3808000e-01
   1.3446000e-01
   9.6730000e-02
   5.5600000e-02
   4.6940000e-02
   3.4800000e-03
  -1.6450000e-02
  -2.8460000e-02
  -8.5760000e-02
  -9.3740000e-02
  -1.0438000e-01
  -1.4828000e-01
  -1.8716000e-01
  -2.0062000e-01
  -2.5088000e-01
  -2.1150000e-01
  -2.7467000e-01
  -2.5046000e-01
  -2.7786000e-01
  -2.0654000e-01
  -2.2875000e-01
  -1.7751000e-01
  -1.4581000e-01
  -1.1483000e-01
  -7.4280000e-02
  -1.1680000e-02
  -2.4620000e-02
   8.1380000e-02
   3.5730000e-02
   1.0509000e-01
   1.3679000e-01
   1.6780000e-01
   1.6942000e-01
   1.8485000e-01
   2.1978000e-01
   1.7967000e-01
   2.4166000e-01
   1.8101000e-01
   2.1841000e-01
   1.9206000e-01
   1.6805000e-01
   2.0487000e-01
   1.7805000e-01
   1.5615000e-01
   1.5458000e-01
   1.5782000e-01
   1.4381000e-01
   9.0450000e-02
   7.3040000e-02
   5.0810000e-02
   5.0090000e-02
  -3.1500000e-02
  -4.6500000e-02
  -8.1870000e-02
  -1.3693000e-01
  -1.0419000e-01
  -2.2924000e-01
  -1.9459000e-01
  -2.2954000e-01
  -2.8468000e-01
  -2.4427000e-01
  -2.6859000e-01
  -2.3555000e-01
  -2.4482000e-01
  -2.2233000e-01
  -1.7295000e-01
  -1.5968000e-01
  -9.2400000e-02
  -1.0786000e-01
  -4.9850000e-02
  -6.5500000e-03
  -1.3930000e-02
   5.0590000e-02
   6.8980000e-02
   6.2160000e-02
   1.2434000e-01
   1.1913000e-01
   1.5335000e-01
   1.6928000e-01
   1.6382000e-01
   2.2562000e-01
   2.0649000e-01
   2.2979000e-01
   2.3837000e-01
   1.9527000e-01
   2.2280000e-01
   2.3462000e-01
   1.8255000e-01
   1.9497000e-01
   1.6818000e-01
   1.5771000e-01
   1.3715000e-01
   1.0899000e-01
   6.0870000e-02
   6.4870000e-02
   9.8400000e-03
  -3.3010000e-02
  -5.3220000e-02
  -1.4463000e-01
  -7.3590000e-02
  -1.8420000e-01
  -1.7315000e-01
  -2.2971000e-01
  -2.0202000e-01
  -2.4728000e-01
  -2.5565000e-01
  -2.7103000e-01
  -2.2661000e-01
  -2.2554000e-01
  -1.9758000e-01
  -2.1836000e-01
  -1.2807000e-01
  -1.4131000e-01
  -9.8070000e-02
  -9.1300000e-02
  -3.8550000e-02
  -1.3870000e-02
   5.7740000e-02
   7.5950000e-02
   1.0720000e-01
   1.1291000e-01
   2.0657000e-01
   1.7323000e-01
   2.0498000e-01
   1.6763000e-01
   2.1551000e-01
   2.1260000e-01
   1.9925000e-01
   2.1386000e-01
   1.9886000e-01
   1.8373000e-01
   2.0533000e-01
   1.9555000e-01
   1.6042000e-01
   1.6613000e-01
   1.5033000e-01
   1.2067000e-01
   1.0625000e-01
   9.4400000e-02
   7.6720000e-02
   2.0600000e-03
  -2.6980000e-02
  -3.2870000e-02
  -1.0046000e-01
  -1.1614000e-01
  -1.4477000e-01
  -1.7805000e-01
  -2.0799000e-01
  -1.9042000e-01
  -2.8241000e-01
  -2.1671000e-01
  -2.7956000e-01
  -2.5973000e-01
  -1.8968000e-01
  -2.5493000e-01
  -1.5453000e-01
  -1.7718000e-01
  -1.2031000e-01
  -1.2245000e-01
  -6.1220000e-02
  -7.1860000e-02
  -9.4000000e-03
   1.2690000e-02
   6.9700000e-02
   6.8440000e-02
   1.3035000e-01
   1.5845000e-01
   1.8842000e-01
