# Supplementary material for: A Novel Classification Method for Flutter Signals Based on the CNN and STFT
Source: Hindawi journal article supplement (doi:10.1155/2019/9375437), 2019-04-09
Supplement: f1 [file 9375437.f1.zip › 01_9_z29.5_38channel.txt]

   1.6340000e-02
   1.5820000e-02
   1.4700000e-02
   1.1760000e-02
   2.2510000e-02
  -6.2000000e-03
  -1.9410000e-02
  -1.2640000e-02
  -1.2640000e-02
  -3.0000000e-05
  -9.4900000e-03
  -1.8100000e-02
  -3.3310000e-02
  -3.5010000e-02
  -5.7410000e-02
  -5.5060000e-02
  -5.0070000e-02
  -2.6980000e-02
  -1.8100000e-02
  -4.1890000e-02
  -5.1460000e-02
  -5.3660000e-02
  -7.8500000e-02
  -8.3870000e-02
  -5.7550000e-02
  -3.7670000e-02
  -4.0330000e-02
  -1.6420000e-02
  -1.1380000e-02
   8.0300000e-03
   8.8300000e-03
   9.4600000e-03
   5.6500000e-03
   6.3000000e-04
   2.0920000e-02
   2.8680000e-02
   5.9090000e-02
   5.3080000e-02
   6.8900000e-02
   8.7270000e-02
   7.2360000e-02
   7.9900000e-02
   4.4640000e-02
   4.7130000e-02
   2.3250000e-02
   4.5930000e-02
   5.0390000e-02
   4.3100000e-02
   3.3590000e-02
   1.9850000e-02
   1.7330000e-02
  -1.6000000e-04
  -2.4430000e-02
  -4.1000000e-04
  -7.5900000e-03
  -7.5700000e-03
  -2.9600000e-03
  -1.2890000e-02
  -4.2940000e-02
  -1.3630000e-02
  -1.5550000e-02
   4.4400000e-03
  -6.9400000e-03
  -2.7610000e-02
  -3.1970000e-02
  -1.3130000e-02
   2.5000000e-04
   1.7000000e-03
   2.9670000e-02
   2.0120000e-02
   1.5520000e-02
   1.7740000e-02
   4.0550000e-02
   4.6530000e-02
   5.1980000e-02
   5.2830000e-02
   5.0700000e-02
   7.6170000e-02
   7.4770000e-02
   7.9430000e-02
   5.5270000e-02
   4.3400000e-02
   4.4910000e-02
   2.7230000e-02
   1.9490000e-02
   1.0690000e-02
   2.4460000e-02
   3.7700000e-02
   5.8480000e-02
   7.7240000e-02
   1.0605000e-01
   9.0370000e-02
   6.5420000e-02
   4.3130000e-02
   3.0900000e-02
  -4.1700000e-03
  -1.1270000e-02
  -1.3790000e-02
  -2.7610000e-02
  -1.2370000e-02
  -2.2480000e-02
  -2.3830000e-02
  -3.5120000e-02
  -5.2860000e-02
  -2.4240000e-02
  -3.2330000e-02
  -5.5990000e-02
  -5.3380000e-02
  -2.7990000e-02
  -4.0550000e-02
  -5.9470000e-02
  -5.0530000e-02
  -6.4930000e-02
  -6.9670000e-02
  -8.1460000e-02
  -7.6830000e-02
  -5.6210000e-02
  -4.6530000e-02
  -3.9100000e-02
  -2.4620000e-02
  -4.8500000e-03
   7.9000000e-03
   3.4300000e-02
   3.4710000e-02
   5.0200000e-02
   6.7200000e-02
   5.1740000e-02
   3.2050000e-02
   4.1650000e-02
   4.2580000e-02
   1.6920000e-02
   3.1780000e-02
   6.1990000e-02
   4.9380000e-02
   1.9380000e-02
   4.8750000e-02
   6.0020000e-02
   2.7170000e-02
   2.1990000e-02
   1.5630000e-02
  -3.6500000e-03
  -3.0700000e-03
  -1.2370000e-02
  -3.7810000e-02
  -5.2040000e-02
  -7.8170000e-02
  -5.6890000e-02
  -3.3860000e-02
  -5.6480000e-02
  -5.6970000e-02
  -6.7310000e-02
  -7.9900000e-02
  -7.6060000e-02
  -7.2550000e-02
  -5.5330000e-02
  -6.0430000e-02
  -4.2420000e-02
  -2.2070000e-02
   2.8500000e-03
  -6.2800000e-03
  -1.6920000e-02
   3.2160000e-02
   2.1030000e-02
   2.0300000e-03
   3.1720000e-02
   4.1700000e-02
   3.6360000e-02
   3.4740000e-02
   3.0460000e-02
   3.6140000e-02
   4.6450000e-02
   9.3630000e-02
   6.9810000e-02
   6.8630000e-02
   4.5900000e-02
   5.5190000e-02
   6.1550000e-02
   4.7790000e-02
   5.0920000e-02
   3.0570000e-02
   1.6180000e-02
   1.3600000e-02
   3.5100000e-02
   3.2270000e-02
   4.2200000e-02
   5.3330000e-02
   2.9610000e-02
   5.7300000e-03
  -2.1140000e-02
  -5.0200000e-03
   1.0670000e-02
  -2.4840000e-02
  -4.2170000e-02
  -6.3360000e-02
  -7.2850000e-02
  -3.4740000e-02
  -3.6600000e-02
  -5.3710000e-02
  -4.8800000e-02
  -5.0090000e-02
  -5.1490000e-02
  -2.9120000e-02
  -4.7570000e-02
  -6.1440000e-02
  -5.7720000e-02
  -4.1700000e-02
  -1.8560000e-02
  -6.9100000e-03
  -2.3300000e-03
  -2.2260000e-02
  -1.9500000e-03
   6.4400000e-03
   4.8500000e-02
   7.2490000e-02
   7.2800000e-02
   5.2010000e-02
   4.4470000e-02
   7.7620000e-02
   8.2720000e-02
   8.7220000e-02
   7.4660000e-02
   5.6510000e-02
   6.2540000e-02
   7.2270000e-02
   7.8390000e-02
   3.9210000e-02
   3.6740000e-02
   3.3610000e-02
   2.9860000e-02
   1.0750000e-02
   1.3000000e-02
  -1.8420000e-02
  -1.8510000e-02
  -1.5770000e-02
  -1.7550000e-02
  -1.0750000e-02
  -1.5850000e-02
   1.5900000e-03
  -2.2810000e-02
  -4.9680000e-02
  -7.4220000e-02
  -6.7150000e-02
  -5.9850000e-02
  -5.5140000e-02
  -5.2260000e-02
  -5.5440000e-02
  -8.9160000e-02
  -6.8960000e-02
  -3.5780000e-02
  -3.5890000e-02
  -3.2380000e-02
  -2.7690000e-02
  -4.7700000e-03
  -1.7330000e-02
  -1.0500000e-02
   1.0090000e-02
   1.4260000e-02
   3.7810000e-02
   4.8010000e-02
   3.9670000e-02
   4.2330000e-02
   4.2310000e-02
   4.8690000e-02
   3.3640000e-02
   4.4970000e-02
   4.5460000e-02
   4.9160000e-02
   3.9020000e-02
   3.4220000e-02
   3.8500000e-02
   3.9950000e-02
  -1.5900000e-03
   1.3410000e-02
   1.2500000e-02
   4.0900000e-03
   1.3960000e-02
   1.9500000e-03
  -1.2450000e-02
  -3.9370000e-02
  -4.6450000e-02
  -5.0150000e-02
  -3.8600000e-02
  -5.1240000e-02
  -6.1250000e-02
  -6.7940000e-02
  -7.0000000e-02
  -5.2230000e-02
  -5.5140000e-02
  -6.6900000e-02
  -5.1380000e-02
  -5.5740000e-02
  -5.4290000e-02
  -6.3640000e-02
  -3.6190000e-02
  -3.3010000e-02
  -3.4460000e-02
  -1.8010000e-02
  -1.1710000e-02
   4.9600000e-03
   2.6730000e-02
   2.8600000e-02
   7.2400000e-03
   5.3500000e-03
  -1.1680000e-02
   9.0200000e-03
   1.3330000e-02
   3.9800000e-03
   1.2640000e-02
   2.0700000e-02
   2.6050000e-02
   5.5410000e-02
   3.1720000e-02
   3.1500000e-02
   3.9370000e-02
   6.3280000e-02
   7.2900000e-02
   6.3970000e-02
   5.6650000e-02
   5.6370000e-02
   6.6240000e-02
   4.9930000e-02
   3.4570000e-02
   2.6490000e-02
   1.5440000e-02
   2.5910000e-02
   0.0000000e+00
   2.4350000e-02
   1.6640000e-02
   1.7600000e-02
   2.8790000e-02
   1.3900000e-02
   7.4600000e-03
   2.5220000e-02
   1.4000000e-04
  -3.6820000e-02
  -3.8990000e-02
  -3.6140000e-02
  -4.2580000e-02
  -4.9080000e-02
  -4.2000000e-02
  -2.7860000e-02
  -3.6110000e-02
  -5.0280000e-02
  -2.5010000e-02
  -3.2100000e-03
   1.8150000e-02
   3.8280000e-02
   6.1140000e-02
   7.4630000e-02
   8.0230000e-02
   6.4380000e-02
   4.7570000e-02
   1.5460000e-02
  -1.6700000e-03
   3.2080000e-02
   4.4800000e-02
   6.6900000e-02
   9.0070000e-02
   1.0232000e-01
   8.8040000e-02
   8.6810000e-02
   9.0890000e-02
   7.3810000e-02
   5.8670000e-02
   1.9820000e-02
   7.5900000e-03
   1.4000000e-04
  -1.2720000e-02
  -2.3580000e-02
  -3.4930000e-02
  -4.6040000e-02
  -3.7120000e-02
  -2.4650000e-02
  -5.7220000e-02
  -1.7330000e-02
  -2.6050000e-02
  -3.1560000e-02
  -1.6970000e-02
  -2.9470000e-02
  -2.6840000e-02
  -3.4740000e-02
  -2.3550000e-02
  -4.9570000e-02
  -6.1280000e-02
  -6.6490000e-02
  -4.9520000e-02
  -4.3490000e-02
  -2.0970000e-02
  -3.5450000e-02
  -1.3400000e-03
   3.6630000e-02
   3.8170000e-02
   4.0170000e-02
   2.0510000e-02
   2.2810000e-02
   1.6480000e-02
   2.9200000e-02
   3.3260000e-02
   2.8300000e-02
   2.9200000e-02
   3.9210000e-02
   2.6680000e-02
   1.8700000e-02
   5.7000000e-02
   3.1090000e-02
   3.6770000e-02
   2.9100000e-03
   2.5550000e-02
   2.0840000e-02
   5.9200000e-03
   4.2800000e-02
   4.1680000e-02
   5.1520000e-02
   2.7990000e-02
   3.6990000e-02
   4.0600000e-03
  -1.9000000e-02
  -1.7930000e-02
  -1.9770000e-02
  -2.6950000e-02
  -1.7550000e-02
  -4.1000000e-04
  -1.0580000e-02
  -1.7600000e-02
  -1.1190000e-02
  -2.6650000e-02
  -9.5400000e-03
   2.7700000e-03
  -1.9550000e-02
  -2.8350000e-02
  -2.4900000e-02
  -3.9650000e-02
  -2.0400000e-02
  -6.0000000e-04
  -3.7600000e-03
  -2.5280000e-02
  -2.8020000e-02
   1.0910000e-02
   1.9910000e-02
   3.9100000e-02
   6.0050000e-02
   4.8640000e-02
   5.4730000e-02
   6.9780000e-02
   6.7830000e-02
   4.7600000e-02
   5.6540000e-02
   6.6790000e-02
   7.1100000e-02
   5.0590000e-02
   2.9500000e-02
   1.1900000e-02
   2.2810000e-02
   2.9450000e-02
   2.2240000e-02
   1.6450000e-02
   4.2530000e-02
   2.9230000e-02
   5.7000000e-03
   1.2340000e-02
  -1.1490000e-02
  -2.5250000e-02
  -1.4720000e-02
  -1.4920000e-02
  -2.7420000e-02
  -2.3630000e-02
  -3.0630000e-02
  -3.3150000e-02
  -2.2620000e-02
   1.0400000e-03
  -7.6200000e-03
  -1.9140000e-02
  -3.6500000e-03
  -1.3870000e-02
  -1.4920000e-02
   3.3700000e-03
  -3.3700000e-03
   5.9800000e-03
   3.4740000e-02
   4.2830000e-02
   3.3830000e-02
   4.1510000e-02
   5.9200000e-02
   6.0350000e-02
   6.5690000e-02
   5.6760000e-02
   3.9130000e-02
   3.8520000e-02
   2.9470000e-02
  -6.7200000e-03
   3.8900000e-03
  -3.0000000e-05
   6.3900000e-03
   1.9990000e-02
   4.0170000e-02
   6.2350000e-02
   4.7430000e-02
   1.3520000e-02
   4.3680000e-02
   2.9060000e-02
   3.5340000e-02
   5.5360000e-02
   6.0900000e-03
   7.3800000e-03
   3.7780000e-02
   3.6550000e-02
   3.5310000e-02
   1.5900000e-02
  -1.9000000e-04
   1.8100000e-02
   9.1300000e-03
  -1.0890000e-02
  -2.2700000e-02
  -2.9420000e-02
  -1.7410000e-02
  -2.2570000e-02
  -2.3960000e-02
  -3.8660000e-02
  -6.5830000e-02
  -6.8050000e-02
  -4.4550000e-02
  -1.1570000e-02
   1.1240000e-02
   6.3100000e-03
   3.9200000e-03
   2.6710000e-02
   1.3080000e-02
   4.7870000e-02
   2.6180000e-02
   2.3200000e-02
   1.7880000e-02
   1.1820000e-02
   1.9270000e-02
   1.9250000e-02
   1.0470000e-02
   4.5500000e-03
   3.2190000e-02
   2.9120000e-02
   1.5190000e-02
   2.5250000e-02
   1.3630000e-02
  -6.3100000e-03
   1.7850000e-02
   3.1750000e-02
   2.7400000e-03
   1.3630000e-02
   2.3550000e-02
   7.4000000e-03
   1.5900000e-02
   5.8000000e-04
  -1.0400000e-03
  -1.1320000e-02
  -1.9990000e-02
  -2.6050000e-02
  -3.7010000e-02
  -6.5000000e-03
   4.3600000e-03
  -1.4070000e-02
  -6.2200000e-03
  -2.3610000e-02
   1.4000000e-03
   6.2800000e-03
   8.8800000e-03
   1.1240000e-02
   5.6800000e-03
   3.2520000e-02
   1.8480000e-02
   3.4140000e-02
   3.3150000e-02
   2.8380000e-02
   3.4160000e-02
   2.4430000e-02
   2.2350000e-02
   1.6340000e-02
   2.9890000e-02
   3.5400000e-03
   4.8800000e-03
   2.9830000e-02
   3.9590000e-02
   6.5800000e-02
   4.6800000e-02
   2.6760000e-02
   2.8730000e-02
   6.9100000e-03
   1.8370000e-02
   3.0190000e-02
   3.6110000e-02
   1.8420000e-02
   1.6090000e-02
  -5.4600000e-03
  -2.0600000e-03
  -1.6890000e-02
  -2.4210000e-02
  -3.9130000e-02
  -5.9910000e-02
  -5.9360000e-02
  -5.8040000e-02
  -7.1950000e-02
  -5.1240000e-02
  -4.8640000e-02
  -4.6720000e-02
  -6.8020000e-02
  -5.6590000e-02
  -6.4570000e-02
  -7.6140000e-02
  -6.8300000e-02
  -4.8640000e-02
  -4.6610000e-02
  -4.0440000e-02
  -5.0830000e-02
  -6.6430000e-02
  -6.0900000e-02
  -3.6190000e-02
  -1.4340000e-02
  -1.4000000e-03
   1.3430000e-02
   3.3290000e-02
   6.5010000e-02
   9.1360000e-02
   8.1950000e-02
   9.3300000e-02
   6.2350000e-02
   5.2400000e-02
   8.1980000e-02
   7.4710000e-02
   7.5400000e-02
   1.0381000e-01
   9.8270000e-02
   6.9530000e-02
   8.2640000e-02
   8.4230000e-02
   5.6430000e-02
   2.7940000e-02
   4.2330000e-02
   2.8100000e-02
   1.8600000e-03
   2.1700000e-03
  -1.9060000e-02
  -3.0130000e-02
  -3.2130000e-02
  -3.4460000e-02
  -3.2300000e-02
  -5.1710000e-02
  -6.3800000e-02
  -6.3360000e-02
  -5.1880000e-02
  -2.2760000e-02
  -2.8900000e-02
  -3.3120000e-02
  -3.0190000e-02
  -6.1120000e-02
  -4.4860000e-02
  -7.1450000e-02
  -6.5230000e-02
  -4.4140000e-02
  -4.2530000e-02
  -2.2590000e-02
  -2.9060000e-02
  -1.4530000e-02
  -2.2290000e-02
  -1.5660000e-02
   7.2400000e-03
   1.1840000e-02
   1.2720000e-02
   4.2800000e-03
  -2.8800000e-03
  -6.9400000e-03
  -1.8400000e-03
  -2.9010000e-02
   1.2600000e-03
  -2.4950000e-02
  -9.3500000e-03
   2.1910000e-02
   6.4400000e-03
   5.3200000e-03
  -7.5100000e-03
   5.0700000e-03
   1.5850000e-02
   1.6370000e-02
   9.7900000e-03
   5.8000000e-04
   5.0200000e-03
  -1.0010000e-02
   1.3220000e-02
   4.5500000e-03
   6.1700000e-03
  -9.7100000e-03
  -2.8240000e-02
  -3.7430000e-02
  -3.2270000e-02
  -1.6810000e-02
  -8.1700000e-03
  -3.3200000e-03
   2.6600000e-03
   1.1350000e-02
   3.7800000e-03
   1.9200000e-03
  -4.1100000e-03
  -3.1420000e-02
  -1.8590000e-02
   4.1000000e-04
  -4.4800000e-02
  -2.3330000e-02
  -4.8800000e-03
  -1.3020000e-02
   2.3250000e-02
   3.4380000e-02
   5.8670000e-02
   7.6520000e-02
   7.8910000e-02
   1.0671000e-01
   8.5900000e-02
   7.5480000e-02
   7.4660000e-02
   7.0960000e-02
   8.0660000e-02
   9.7860000e-02
   1.1107000e-01
   1.0093000e-01
   8.9710000e-02
   8.2860000e-02
   7.5400000e-02
   6.2460000e-02
   5.0370000e-02
   4.5870000e-02
   2.1610000e-02
   1.8400000e-02
  -1.4300000e-03
  -1.8370000e-02
  -1.7990000e-02
  -2.6270000e-02
  -5.1600000e-02
  -6.0730000e-02
  -5.0150000e-02
  -6.2870000e-02
  -7.1180000e-02
  -6.1090000e-02
  -6.1470000e-02
  -6.4160000e-02
  -8.3300000e-02
  -6.2160000e-02
  -3.1310000e-02
  -3.5560000e-02
  -4.9790000e-02
  -4.4060000e-02
  -3.9890000e-02
  -2.2540000e-02
  -1.0500000e-02
   1.9550000e-02
   3.5860000e-02
   1.5000000e-02
   9.1900000e-03
   1.8120000e-02
   2.3200000e-02
   3.2270000e-02
   6.9970000e-02
   6.9010000e-02
   6.8460000e-02
   7.4960000e-02
   7.9570000e-02
   6.7390000e-02
   5.8540000e-02
   4.2170000e-02
   5.8700000e-02
   6.5940000e-02
   4.6390000e-02
   6.0160000e-02
   7.0960000e-02
   5.7550000e-02
   7.6550000e-02
   8.6040000e-02
   6.6710000e-02
   3.2790000e-02
   1.6310000e-02
   2.5120000e-02
   2.1720000e-02
   1.1800000e-03
   1.4000000e-04
   1.3000000e-02
   2.2200000e-03
  -2.0230000e-02
  -1.3630000e-02
  -2.5090000e-02
  -1.7740000e-02
  -1.8150000e-02
  -2.5360000e-02
  -4.4970000e-02
  -5.8480000e-02
  -3.3530000e-02
  -2.9610000e-02
  -5.2040000e-02
  -1.2580000e-02
  -8.4200000e-03
  -1.3960000e-02
  -1.3220000e-02
   1.9960000e-02
   8.5800000e-03
   7.0200000e-03
   4.4200000e-02
   4.5460000e-02
   5.2290000e-02
   4.6560000e-02
   5.6040000e-02
   3.0240000e-02
  -1.1840000e-02
  -1.3130000e-02
   2.3600000e-03
   2.2200000e-03
   1.7960000e-02
   3.4460000e-02
   1.1820000e-02
   3.4140000e-02
   5.8950000e-02
   4.0850000e-02
   3.7560000e-02
   2.3000000e-02
  -1.1200000e-03
  -2.6600000e-02
  -2.5390000e-02
  -2.3090000e-02
  -4.1020000e-02
  -4.9930000e-02
  -4.0170000e-02
  -4.6690000e-02
  -4.2910000e-02
  -5.6340000e-02
  -7.1400000e-02
  -6.0160000e-02
  -2.9640000e-02
  -1.8730000e-02
  -1.2420000e-02
  -3.2710000e-02
  -3.7150000e-02
  -4.1980000e-02
  -5.0260000e-02
  -7.4520000e-02
  -5.2640000e-02
  -2.6570000e-02
  -8.5500000e-03
   1.3020000e-02
  -6.6900000e-03
   9.7600000e-03
   2.2510000e-02
   7.5100000e-03
   1.9330000e-02
   2.5660000e-02
   2.1740000e-02
   1.7790000e-02
   4.0060000e-02
   6.2380000e-02
   9.1770000e-02
   7.9240000e-02
   8.8700000e-02
   7.7040000e-02
   6.8130000e-02
   7.0570000e-02
   3.1310000e-02
   2.9260000e-02
   4.0300000e-02
   5.0420000e-02
   3.6160000e-02
   2.1030000e-02
  -2.8800000e-03
  -2.7530000e-02
  -1.8100000e-02
  -2.0290000e-02
   3.5900000e-03
   4.0300000e-03
  -2.5000000e-04
  -2.3990000e-02
  -3.7010000e-02
  -6.2320000e-02
  -5.6100000e-02
  -4.2850000e-02
  -5.3710000e-02
  -9.2100000e-02
  -9.2650000e-02
  -7.6520000e-02
  -6.3120000e-02
  -8.4940000e-02
  -6.3470000e-02
  -4.7460000e-02
  -1.5380000e-02
   3.2330000e-02
   1.3380000e-02
   2.3420000e-02
   3.9130000e-02
   3.1830000e-02
   7.3950000e-02
   8.0580000e-02
   9.4100000e-02
   9.3390000e-02
   1.2292000e-01
   8.5740000e-02
   8.8640000e-02
   1.0633000e-01
   8.2090000e-02
   8.7380000e-02
   1.0646000e-01
   1.1203000e-01
   1.0057000e-01
   1.0254000e-01
   1.0071000e-01
   8.9410000e-02
   7.4660000e-02
   6.2180000e-02
   3.1500000e-02
  -1.0700000e-03
  -2.9470000e-02
  -2.4160000e-02
  -8.3900000e-03
  -2.0230000e-02
  -2.2370000e-02
  -3.1090000e-02
  -6.7400000e-03
  -3.3180000e-02
  -3.0600000e-02
  -2.3850000e-02
  -1.5550000e-02
   2.0000000e-03
  -2.2400000e-02
  -1.5960000e-02
  -1.3490000e-02
  -1.1130000e-02
  -5.2100000e-03
  -3.2600000e-02
  -3.5230000e-02
  -3.2440000e-02
  -4.1540000e-02
  -4.2830000e-02
  -3.9950000e-02
  -3.6800000e-02
   1.8560000e-02
   4.0500000e-02
   4.2770000e-02
   4.6040000e-02
   2.9300000e-03
   1.0010000e-02
   3.0760000e-02
   1.9190000e-02
   2.1580000e-02
   1.7600000e-02
   2.0780000e-02
   2.1030000e-02
   4.2390000e-02
   4.4550000e-02
   4.6860000e-02
   2.9090000e-02
   1.9190000e-02
   2.2870000e-02
   2.0970000e-02
   4.0360000e-02
   2.9560000e-02
   1.1020000e-02
   3.4850000e-02
   4.4720000e-02
   3.0050000e-02
   1.6400000e-02
  -9.3000000e-04
  -1.8290000e-02
  -2.2950000e-02
  -1.8780000e-02
  -3.6080000e-02
  -3.9670000e-02
  -3.7620000e-02
  -4.7820000e-02
  -3.9950000e-02
  -4.3290000e-02
  -1.8450000e-02
  -2.7770000e-02
  -3.0210000e-02
  -7.3800000e-03
   6.5500000e-03
   3.9400000e-02
   6.5090000e-02
   5.0420000e-02
   5.1270000e-02
   6.4930000e-02
   4.0770000e-02
   5.0390000e-02
   6.3340000e-02
   3.3920000e-02
   3.5260000e-02
   4.3680000e-02
   4.0300000e-02
   4.7930000e-02
   4.1590000e-02
   4.3130000e-02
   3.6660000e-02
   5.8950000e-02
   6.5310000e-02
   4.3460000e-02
   3.0930000e-02
   5.0640000e-02
   2.1610000e-02
  -1.6010000e-02
  -1.2230000e-02
  -3.5860000e-02
  -2.3500000e-02
  -1.2940000e-02
  -7.5900000e-03
  -2.6570000e-02
  -3.5010000e-02
  -1.1020000e-02
  -1.2690000e-02
  -3.1200000e-02
  -6.0290000e-02
  -5.8980000e-02
  -5.0070000e-02
  -6.0900000e-02
  -5.1770000e-02
  -6.3830000e-02
  -5.2400000e-02
  -5.3080000e-02
  -3.8850000e-02
  -4.3270000e-02
  -5.1600000e-02
  -4.0030000e-02
  -4.4700000e-03
   2.6760000e-02
   2.8730000e-02
   1.6670000e-02
   4.1840000e-02
  -4.4400000e-03
  -1.1730000e-02
  -1.2940000e-02
  -3.7070000e-02
  -9.7600000e-03
   1.1840000e-02
  -4.6900000e-03
  -1.5630000e-02
   1.0250000e-02
   5.7600000e-03
   1.7080000e-02
   3.2490000e-02
   3.2190000e-02
   2.2320000e-02
  -2.7140000e-02
  -4.0410000e-02
  -1.5980000e-02
  -1.0120000e-02
  -2.2020000e-02
  -4.4360000e-02
  -5.6450000e-02
  -1.4450000e-02
   3.7800000e-03
  -1.1270000e-02
  -6.3600000e-03
  -2.4270000e-02
  -3.1280000e-02
  -1.8730000e-02
  -2.5640000e-02
  -1.3570000e-02
  -2.6180000e-02
  -4.6250000e-02
  -6.4050000e-02
  -6.2400000e-02
  -4.0410000e-02
  -3.3750000e-02
   1.9000000e-04
   1.8290000e-02
   5.1490000e-02
   7.8910000e-02
   7.6220000e-02
   6.9400000e-02
   8.8700000e-02
   4.2200000e-02
   3.2410000e-02
   2.8540000e-02
   2.7640000e-02
   2.7340000e-02
   2.3220000e-02
   7.0660000e-02
   4.9570000e-02
   5.1270000e-02
   6.0370000e-02
   5.1600000e-02
   5.3200000e-03
  -5.5100000e-03
  -2.6000000e-03
  -1.7300000e-02
   1.4610000e-02
  -2.3060000e-02
  -1.6590000e-02
   1.3400000e-03
  -1.9690000e-02
  -2.6810000e-02
  -1.8780000e-02
  -5.7170000e-02
  -6.0870000e-02
  -1.6200000e-02
  -3.3590000e-02
  -2.6020000e-02
  -2.8130000e-02
  -5.1410000e-02
  -6.7120000e-02
  -7.7150000e-02
  -4.2530000e-02
  -2.7250000e-02
  -3.6800000e-02
  -4.1870000e-02
  -2.3720000e-02
   1.1900000e-02
   2.6790000e-02
   3.6580000e-02
   9.1900000e-03
   4.8800000e-03
   4.5000000e-03
   1.3160000e-02
  -7.4300000e-03
   5.1500000e-03
  -4.2800000e-03
   3.5400000e-02
   6.1470000e-02
   6.7970000e-02
   7.2550000e-02
   3.9950000e-02
   2.7530000e-02
   3.7810000e-02
   2.5280000e-02
   3.6690000e-02
   4.7210000e-02
   7.1400000e-02
   4.5760000e-02
   4.7730000e-02
   5.2590000e-02
   5.1680000e-02
   2.5770000e-02
  -2.0000000e-03
   1.3930000e-02
  -9.9800000e-03
   1.6400000e-02
   9.6200000e-03
  -1.6070000e-02
  -2.3000000e-02
  -3.9870000e-02
  -3.4000000e-02
  -1.3220000e-02
  -4.2140000e-02
  -3.5310000e-02
  -4.3160000e-02
  -5.5030000e-02
  -4.2880000e-02
  -3.7700000e-02
  -1.9470000e-02
  -2.4480000e-02
  -6.0460000e-02
  -4.4530000e-02
  -2.0320000e-02
  -9.9300000e-03
  -1.5900000e-02
   9.6000000e-04
   2.2920000e-02
   4.9850000e-02
   8.9680000e-02
   1.0564000e-01
   1.2876000e-01
   1.1296000e-01
   8.5330000e-02
   9.4480000e-02
   8.6640000e-02
   7.6850000e-02
   9.2430000e-02
   7.2710000e-02
   8.4040000e-02
   9.7800000e-02
   1.1365000e-01
   1.1137000e-01
   8.4500000e-02
   6.5450000e-02
   4.3350000e-02
   1.7850000e-02
   2.6020000e-02
   1.3540000e-02
   3.4000000e-03
   1.3700000e-03
  -3.0000000e-02
  -2.2020000e-02
  -2.5220000e-02
  -3.5840000e-02
  -3.2740000e-02
  -3.0160000e-02
  -5.5400000e-03
  -2.0510000e-02
  -2.1280000e-02
  -6.6900000e-03
  -1.1000000e-04
  -2.8460000e-02
  -4.8910000e-02
  -3.3120000e-02
  -1.4280000e-02
  -2.2800000e-03
  -1.0250000e-02
  -1.1800000e-03
  -8.0100000e-03
   1.9000000e-04
  -1.9700000e-03
  -1.3110000e-02
  -2.2540000e-02
  -1.8290000e-02
   6.6400000e-03
   3.9070000e-02
   7.0600000e-02
   4.4750000e-02
   3.0410000e-02
   4.8040000e-02
   4.8310000e-02
   4.4690000e-02
   6.8020000e-02
   4.7300000e-02
   6.1700000e-03
   3.1000000e-03
   7.4300000e-03
   4.2880000e-02
   4.4310000e-02
   4.2500000e-02
   3.5510000e-02
   4.8750000e-02
   8.2390000e-02
   8.7240000e-02
   8.1950000e-02
   4.0190000e-02
   6.7010000e-02
   2.6100000e-02
   9.9300000e-03
   2.3610000e-02
  -2.0560000e-02
  -3.9620000e-02
  -5.6120000e-02
  -2.6680000e-02
  -2.3660000e-02
  -1.6310000e-02
  -3.1450000e-02
  -5.4730000e-02
  -2.4270000e-02
  -4.7840000e-02
  -4.8910000e-02
  -2.6730000e-02
  -2.4760000e-02
  -4.5200000e-03
   1.7470000e-02
  -3.5900000e-03
  -1.9770000e-02
   2.6430000e-02
   4.0990000e-02
   4.2200000e-02
   5.9720000e-02
   4.8040000e-02
   4.0250000e-02
   6.8380000e-02
   5.7880000e-02
   6.8760000e-02
   7.0740000e-02
   8.9660000e-02
   8.1400000e-02
   6.2620000e-02
   5.2480000e-02
   5.1520000e-02
   6.0350000e-02
   5.8480000e-02
   5.5960000e-02
   3.1090000e-02
   2.9310000e-02
   2.7830000e-02
   1.3220000e-02
   1.5050000e-02
  -1.0530000e-02
  -4.2390000e-02
  -4.1480000e-02
  -3.0210000e-02
  -4.0630000e-02
  -3.3610000e-02
  -5.4530000e-02
  -4.8150000e-02
  -4.9930000e-02
  -5.7630000e-02
  -6.3310000e-02
  -5.2940000e-02
  -5.9330000e-02
  -4.5510000e-02
  -5.1080000e-02
  -4.0740000e-02
  -4.3490000e-02
  -4.1240000e-02
  -2.9580000e-02
   1.9630000e-02
   8.9100000e-03
   2.5550000e-02
   4.2530000e-02
   2.1190000e-02
   4.6310000e-02
   5.0970000e-02
   5.7250000e-02
   4.4550000e-02
   3.1340000e-02
   4.3870000e-02
   3.2710000e-02
   2.8870000e-02
   2.7120000e-02
   3.4680000e-02
   3.0930000e-02
   6.8740000e-02
   7.9510000e-02
   7.4410000e-02
   7.4060000e-02
   6.7890000e-02
   6.2460000e-02
   3.5010000e-02
   3.3810000e-02
   2.0230000e-02
   5.6800000e-03
   2.5500000e-03
  -2.2430000e-02
  -4.0000000e-02
  -2.8190000e-02
  -4.4880000e-02
  -5.5030000e-02
  -4.7270000e-02
  -3.9400000e-02
  -6.6540000e-02
  -6.3940000e-02
  -4.8120000e-02
  -5.3030000e-02
  -4.0360000e-02
  -5.2290000e-02
  -2.8930000e-02
  -3.9480000e-02
  -5.5470000e-02
  -5.9550000e-02
  -4.4230000e-02
  -2.7770000e-02
   2.0600000e-03
  -1.3160000e-02
  -1.4450000e-02
  -6.3900000e-03
   1.5460000e-02
   3.1800000e-03
   1.3020000e-02
   5.0480000e-02
   3.8080000e-02
   5.9940000e-02
   5.3580000e-02
   4.9760000e-02
   4.1760000e-02
   4.2740000e-02
   6.1030000e-02
   4.0800000e-02
   3.3260000e-02
   1.0580000e-02
   3.4900000e-02
   4.6940000e-02
   3.6380000e-02
   3.6960000e-02
   2.7390000e-02
   2.7230000e-02
   4.2990000e-02
   2.4070000e-02
   2.4210000e-02
  -7.7000000e-04
  -1.6070000e-02
   6.9400000e-03
   2.1990000e-02
   3.5150000e-02
   8.7200000e-03
  -2.6870000e-02
  -1.0450000e-02
  -8.1700000e-03
  -2.0400000e-02
  -2.0150000e-02
  -2.0730000e-02
  -2.4700000e-02
  -1.2260000e-02
  -3.4050000e-02
  -1.1240000e-02
  -1.1600000e-02
   1.9270000e-02
   4.9680000e-02
   5.1770000e-02
   8.1870000e-02
   7.1180000e-02
   5.2560000e-02
   4.4230000e-02
   6.4900000e-02
   7.3700000e-02
   6.6630000e-02
   8.6860000e-02
   6.8600000e-02
   7.6280000e-02
   7.5320000e-02
   6.4410000e-02
   6.5060000e-02
   5.2510000e-02
   6.3060000e-02
   6.6080000e-02
   6.8820000e-02
   6.3720000e-02
   5.9390000e-02
   4.6120000e-02
   3.8800000e-02
   2.0450000e-02
   1.0640000e-02
   2.2570000e-02
   2.1330000e-02
  -5.2900000e-03
  -1.9270000e-02
  -1.9800000e-02
  -1.3520000e-02
  -1.1980000e-02
  -2.2020000e-02
  -5.7880000e-02
  -6.8570000e-02
  -6.9890000e-02
  -5.8780000e-02
  -4.6720000e-02
  -4.0330000e-02
  -5.1630000e-02
  -6.8930000e-02
  -8.5330000e-02
  -4.4390000e-02
  -1.0830000e-02
   3.9200000e-03
   2.2890000e-02
   1.9690000e-02
   2.8500000e-03
   1.2860000e-02
   1.7880000e-02
  -5.7000000e-03
  -1.0060000e-02
   1.4560000e-02
   1.2060000e-02
   3.5560000e-02
   5.2070000e-02
   2.3910000e-02
  -2.2000000e-04
   6.3600000e-03
   2.0210000e-02
   2.2130000e-02
   3.1230000e-02
   1.0910000e-02
   1.1200000e-03
  -1.6700000e-02
  -1.0700000e-03
  -3.3700000e-03
  -1.0610000e-02
  -2.7140000e-02
  -4.1840000e-02
  -4.4060000e-02
  -6.4350000e-02
  -4.3790000e-02
  -1.7470000e-02
  -2.4100000e-03
  -7.6500000e-03
   4.7000000e-04
  -2.7970000e-02
  -2.1850000e-02
  -3.1260000e-02
  -3.8140000e-02
  -1.2500000e-02
  -2.1330000e-02
  -2.0800000e-03
  -1.2900000e-03
   1.8010000e-02
   2.0120000e-02
   1.5600000e-02
   9.7100000e-03
   1.1630000e-02
   2.6810000e-02
   5.9800000e-03
   9.6000000e-04
   3.0320000e-02
   3.6770000e-02
   3.0270000e-02
   1.1210000e-02
   3.0110000e-02
   1.7900000e-02
   1.2830000e-02
   3.6270000e-02
   2.6430000e-02
   2.4730000e-02
   3.3370000e-02
   2.6380000e-02
   4.8500000e-02
   4.8040000e-02
   7.8850000e-02
   5.3140000e-02
   4.3100000e-02
   4.5320000e-02
   1.4810000e-02
   1.1410000e-02
   2.3600000e-03
  -1.4500000e-03
  -9.7900000e-03
  -3.4800000e-03
   5.7600000e-03
  -9.8400000e-03
  -2.8710000e-02
  -2.3300000e-03
  -3.3120000e-02
  -5.7630000e-02
  -6.1550000e-02
  -7.0660000e-02
  -7.1620000e-02
  -6.4300000e-02
  -7.1200000e-02
  -7.4690000e-02
  -6.4680000e-02
  -3.6250000e-02
  -4.7050000e-02
  -5.1850000e-02
  -5.0590000e-02
  -4.6390000e-02
  -2.7860000e-02
  -8.9100000e-03
   1.9710000e-02
   3.2160000e-02
   1.8890000e-02
   2.7000000e-04
  -3.2600000e-03
   9.1900000e-03
   4.3600000e-03
   2.5860000e-02
   3.9510000e-02
   7.1750000e-02
   9.4460000e-02
   6.3990000e-02
   3.8250000e-02
   3.4990000e-02
   2.5720000e-02
   4.0440000e-02
   3.7780000e-02
   2.4730000e-02
   2.6460000e-02
   1.8510000e-02
   2.5440000e-02
   3.4740000e-02
   5.9200000e-03
   2.6000000e-03
  -2.3390000e-02
  -1.2530000e-02
  -8.9400000e-03
   6.1100000e-03
   2.5000000e-03
  -7.9000000e-03
  -1.4500000e-03
  -2.7990000e-02
  -3.0490000e-02
   2.2540000e-02
  -9.3000000e-04
  -3.3700000e-02
  -1.3650000e-02
  -1.1430000e-02
  -2.0100000e-02
  -1.1950000e-02
  -2.5200000e-03
   1.1570000e-02
   6.6460000e-02
   6.8710000e-02
   6.5340000e-02
   4.9600000e-02
   3.8080000e-02
   3.4630000e-02
   5.1330000e-02
   3.8710000e-02
   6.1800000e-02
   8.9410000e-02
   9.2730000e-02
   8.2640000e-02
   5.2670000e-02
   5.8070000e-02
   2.7580000e-02
   3.0190000e-02
   5.5360000e-02
   2.2430000e-02
   1.9850000e-02
   4.0610000e-02
   3.7970000e-02
   2.6570000e-02
   3.0160000e-02
   2.8510000e-02
   3.6200000e-03
  -3.5900000e-03
  -8.0100000e-03
   5.5700000e-03
  -2.3910000e-02
  -4.0660000e-02
  -2.4480000e-02
  -2.9750000e-02
  -3.4770000e-02
   1.2800000e-02
  -8.1400000e-03
  -2.1930000e-02
   7.4000000e-04
   1.6920000e-02
  -4.9100000e-03
  -2.2920000e-02
  -2.5200000e-03
  -5.0000000e-05
   2.9750000e-02
   3.7670000e-02
   1.6590000e-02
   1.4810000e-02
   4.4970000e-02
   7.7210000e-02
   7.3340000e-02
   8.4200000e-02
   6.5500000e-02
   6.9700000e-02
   1.0356000e-01
   7.0680000e-02
   6.2320000e-02
   6.0510000e-02
   3.4880000e-02
   2.2780000e-02
   8.3400000e-03
  -6.6400000e-03
   1.4780000e-02
   2.0620000e-02
   4.0610000e-02
   4.8230000e-02
   3.9980000e-02
   3.9780000e-02
   2.7720000e-02
   9.5100000e-03
  -1.3600000e-02
  -1.8530000e-02
  -1.7470000e-02
  -3.4380000e-02
  -1.0750000e-02
  -3.1860000e-02
  -5.7000000e-02
  -5.0560000e-02
  -3.2710000e-02
  -3.6580000e-02
  -5.3410000e-02
  -6.7830000e-02
  -4.1810000e-02
  -7.1700000e-02
  -7.6030000e-02
  -8.6810000e-02
  -8.7490000e-02
  -6.7010000e-02
  -6.9450000e-02
  -4.6500000e-02
  -3.8550000e-02
  -2.5120000e-02
  -5.3200000e-03
  -1.4200000e-02
   1.0340000e-02
   9.6500000e-03
   2.7580000e-02
   4.7320000e-02
   3.0900000e-02
   3.9430000e-02
   3.8800000e-02
   4.6470000e-02
   5.8070000e-02
   6.3140000e-02
   4.3380000e-02
   3.7400000e-02
   5.1790000e-02
   3.3290000e-02
   5.4400000e-02
   8.4090000e-02
   6.1220000e-02
   6.0620000e-02
   4.4880000e-02
   2.9560000e-02
   2.0040000e-02
  -1.0400000e-03
  -1.7050000e-02
  -2.9170000e-02
  -2.3910000e-02
  -3.9620000e-02
  -3.6470000e-02
  -9.7900000e-03
  -2.1440000e-02
  -3.7750000e-02
  -6.5670000e-02
  -7.0900000e-02
  -4.3950000e-02
  -1.9490000e-02
  -4.8010000e-02
  -4.7460000e-02
  -3.4740000e-02
  -4.8750000e-02
  -1.7710000e-02
   2.3600000e-03
   3.1300000e-03
   1.7410000e-02
   1.7930000e-02
   2.0780000e-02
   2.4320000e-02
   1.9080000e-02
   2.0730000e-02
   4.7870000e-02
   5.7110000e-02
   3.0760000e-02
   4.7160000e-02
   3.3370000e-02
   4.6890000e-02
   4.0910000e-02
   4.1100000e-02
   3.7780000e-02
   5.3680000e-02
   4.4750000e-02
   3.8710000e-02
   2.6020000e-02
   2.8510000e-02
   3.5420000e-02
   3.0960000e-02
   4.5820000e-02
   2.3550000e-02
  -1.3350000e-02
  -1.0310000e-02
   1.2100000e-03
   4.4000000e-04
  -1.3680000e-02
  -2.6240000e-02
  -3.7400000e-02
  -3.5640000e-02
  -1.7050000e-02
  -2.5500000e-03
  -2.4370000e-02
  -2.8930000e-02
  -1.3900000e-02
  -3.0630000e-02
  -3.7860000e-02
  -2.8620000e-02
  -1.3220000e-02
  -3.2410000e-02
  -3.9260000e-02
  -3.4960000e-02
  -5.6870000e-02
  -3.7150000e-02
   1.8070000e-02
   2.0100000e-02
   4.9080000e-02
   6.6650000e-02
   7.8060000e-02
   6.5310000e-02
   9.0290000e-02
   1.0496000e-01
   6.5310000e-02
   4.4360000e-02
   5.0500000e-02
   7.7840000e-02
   5.9520000e-02
   4.9080000e-02
   7.1100000e-02
   6.8930000e-02
   5.1930000e-02
   3.6410000e-02
   1.1300000e-02
   6.3100000e-03
   6.6900000e-03
   6.7400000e-03
   6.1100000e-03
  -1.9500000e-03
  -1.8290000e-02
  -3.8580000e-02
  -4.5160000e-02
  -6.6460000e-02
  -4.7980000e-02
  -3.6220000e-02
  -4.7680000e-02
  -3.7340000e-02
  -4.8480000e-02
  -5.6590000e-02
  -6.9590000e-02
  -5.2180000e-02
  -6.1880000e-02
  -6.9420000e-02
  -5.1160000e-02
  -6.4190000e-02
  -6.3580000e-02
  -1.3050000e-02
  -4.0880000e-02
  -1.8100000e-03
  -7.7300000e-03
  -9.1000000e-03
   2.9170000e-02
   3.1200000e-02
   5.4810000e-02
   7.8500000e-02
   4.6140000e-02
   4.9460000e-02
   3.7970000e-02
   4.0220000e-02
   3.8580000e-02
   5.6260000e-02
   5.0750000e-02
   6.2510000e-02
   7.4690000e-02
   5.0200000e-02
   3.8360000e-02
   1.7300000e-02
   2.3170000e-02
   6.7700000e-03
   5.1800000e-03
   3.6630000e-02
   3.6930000e-02
   3.2930000e-02
  -5.0000000e-05
  -1.2260000e-02
  -2.5200000e-03
   1.1000000e-04
  -3.2100000e-03
  -1.4260000e-02
  -3.6600000e-02
  -4.1980000e-02
  -4.2660000e-02
  -2.0890000e-02
  -1.9440000e-02
  -7.8100000e-03
  -1.0060000e-02
  -3.5970000e-02
  -3.3480000e-02
  -2.4290000e-02
  -3.1530000e-02
  -6.1990000e-02
  -6.3990000e-02
  -4.2390000e-02
  -3.8630000e-02
  -5.7500000e-02
  -5.4450000e-02
  -3.9070000e-02
  -3.7890000e-02
  -8.2000000e-04
   3.1150000e-02
   4.4720000e-02
   7.9840000e-02
   8.3650000e-02
   1.0197000e-01
   8.2990000e-02
   6.5670000e-02
   1.6670000e-02
   4.5500000e-03
   9.9300000e-03
   1.5600000e-02
   3.8580000e-02
   2.2480000e-02
   3.1340000e-02
   3.7040000e-02
   2.9010000e-02
   3.3230000e-02
   2.1110000e-02
   2.2100000e-02
  -1.3900000e-02
  -2.0950000e-02
  -6.4700000e-03
   3.0000000e-04
  -2.4650000e-02
  -2.1610000e-02
  -4.6140000e-02
  -5.8700000e-02
  -2.9500000e-02
  -8.8000000e-03
  -4.3020000e-02
  -4.7820000e-02
  -2.6160000e-02
  -3.5810000e-02
  -4.4640000e-02
  -3.8520000e-02
  -2.3390000e-02
  -1.6940000e-02
   5.0400000e-03
  -1.6830000e-02
   8.0300000e-03
   2.1880000e-02
   6.1690000e-02
   6.7010000e-02
   5.9960000e-02
   7.5130000e-02
   6.4790000e-02
   6.6210000e-02
   3.6770000e-02
   5.5000000e-02
   2.9670000e-02
   1.6810000e-02
   3.9650000e-02
   4.9460000e-02
   6.5910000e-02
   6.5230000e-02
   5.6450000e-02
   4.9490000e-02
   6.5230000e-02
   4.5050000e-02
   6.3140000e-02
   2.7720000e-02
   1.8750000e-02
   2.5990000e-02
   4.0000000e-03
  -8.3600000e-03
  -1.7330000e-02
  -4.7900000e-02
  -6.8820000e-02
  -5.5470000e-02
  -5.2530000e-02
  -4.0140000e-02
  -3.6190000e-02
  -7.7290000e-02
  -7.2250000e-02
  -7.3320000e-02
  -6.9530000e-02
  -7.7650000e-02
  -6.6540000e-02
  -6.6320000e-02
  -9.2700000e-02
  -8.6480000e-02
  -7.4930000e-02
  -7.7730000e-02
  -8.3270000e-02
  -5.7170000e-02
  -4.7320000e-02
  -3.5670000e-02
  -1.4780000e-02
   1.1650000e-02
   1.9030000e-02
   2.8300000e-02
   5.7800000e-02
   6.1060000e-02
   5.8570000e-02
   5.4260000e-02
   8.1270000e-02
   5.7440000e-02
   3.0000000e-04
   3.9950000e-02
   3.9450000e-02
   3.1480000e-02
   4.3350000e-02
   6.1580000e-02
   8.6610000e-02
   8.6260000e-02
   8.5490000e-02
   9.3080000e-02
   5.4670000e-02
   5.6400000e-02
   4.1240000e-02
  -4.9000000e-04
  -5.1800000e-03
  -3.3780000e-02
  -2.3390000e-02
  -5.1380000e-02
  -4.6720000e-02
  -6.4320000e-02
  -4.4340000e-02
  -4.9220000e-02
  -5.3330000e-02
  -5.0590000e-02
  -5.7410000e-02
  -3.9730000e-02
  -6.5800000e-02
  -9.9030000e-02
  -8.0360000e-02
  -6.2210000e-02
  -5.5660000e-02
   2.0000000e-03
   5.9200000e-03
  -8.7700000e-03
   7.2100000e-03
  -1.6830000e-02
   1.4590000e-02
   2.0590000e-02
   2.8050000e-02
   4.6140000e-02
   5.4700000e-02
   6.0540000e-02
   5.6150000e-02
   7.8220000e-02
   8.5380000e-02
   9.3110000e-02
   1.0084000e-01
   8.2670000e-02
   8.4910000e-02
   5.0920000e-02
   7.1290000e-02
   6.3420000e-02
   5.7300000e-02
   4.1730000e-02
   4.3020000e-02
   3.7230000e-02
   2.2500000e-03
   1.2720000e-02
   2.0180000e-02
   2.8600000e-02
   2.1330000e-02
   4.8800000e-03
   3.0000000e-05
  -3.7950000e-02
  -5.9580000e-02
  -5.7080000e-02
  -2.6380000e-02
  -3.0900000e-02
  -1.8400000e-02
  -3.7840000e-02
  -5.1080000e-02
  -4.8610000e-02
  -5.5080000e-02
  -6.5640000e-02
  -5.5520000e-02
  -3.9800000e-03
  -8.7700000e-03
  -2.2020000e-02
  -8.2000000e-04
  -8.8300000e-03
   7.6500000e-03
   6.0100000e-02
   5.1960000e-02
   4.5350000e-02
   5.1710000e-02
   7.3620000e-02
   9.3440000e-02
   1.0323000e-01
   1.0737000e-01
   1.1173000e-01
   8.9190000e-02
   9.3880000e-02
   9.2150000e-02
   8.2670000e-02
   8.5930000e-02
   9.4020000e-02
   1.1963000e-01
   1.0784000e-01
   8.4910000e-02
   8.1430000e-02
   5.5690000e-02
   2.1960000e-02
  -9.6800000e-03
  -1.1240000e-02
  -3.4770000e-02
  -1.9690000e-02
  -2.7660000e-02
  -1.0530000e-02
  -3.7180000e-02
  -2.6810000e-02
  -2.5940000e-02
  -1.4530000e-02
  -2.4840000e-02
  -6.0590000e-02
  -6.0210000e-02
  -4.7080000e-02
  -3.1170000e-02
  -4.0170000e-02
  -5.3270000e-02
  -6.5830000e-02
  -6.8020000e-02
  -5.5600000e-02
  -4.7020000e-02
  -2.6050000e-02
  -1.6000000e-04
   1.7770000e-02
   5.6040000e-02
   5.1030000e-02
   5.0450000e-02
   5.0940000e-02
   3.4380000e-02
   2.9500000e-02
  -4.3900000e-03
  -1.1520000e-02
  -8.5000000e-04
   2.9260000e-02
   3.1340000e-02
   5.4590000e-02
   5.4750000e-02
   7.2330000e-02
   6.0870000e-02
   5.6480000e-02
   5.5520000e-02
   3.3750000e-02
   2.8300000e-02
   2.6760000e-02
   3.3890000e-02
   1.1000000e-03
  -1.3520000e-02
   1.7300000e-03
   8.6400000e-03
  -8.8300000e-03
  -3.8280000e-02
  -7.1560000e-02
  -3.9260000e-02
  -2.4700000e-02
  -2.0840000e-02
  -3.0460000e-02
  -4.9130000e-02
  -5.1270000e-02
  -4.6010000e-02
  -2.9780000e-02
  -3.2350000e-02
  -3.9590000e-02
  -4.9380000e-02
  -5.2150000e-02
  -3.4630000e-02
  -2.5470000e-02
   1.2500000e-02
   2.2650000e-02
   4.3210000e-02
   5.6760000e-02
   4.7270000e-02
   5.7110000e-02
   4.4280000e-02
   5.2370000e-02
   4.3980000e-02
   6.4620000e-02
   6.4870000e-02
   3.7920000e-02
   2.7230000e-02
   3.1860000e-02
   1.2690000e-02
   4.0600000e-03
   1.7740000e-02
   3.8990000e-02
   6.3600000e-03
   5.8900000e-03
   1.8450000e-02
   1.8970000e-02
   1.9220000e-02
   1.3710000e-02
  -5.1800000e-03
  -9.6200000e-03
   4.8800000e-03
  -1.2560000e-02
  -1.7490000e-02
  -2.2540000e-02
  -1.1950000e-02
  -1.8950000e-02
  -4.3590000e-02
  -3.5100000e-02
  -3.3120000e-02
  -6.8190000e-02
  -9.4480000e-02
  -9.6100000e-02
  -9.6460000e-02
  -7.7040000e-02
  -5.3770000e-02
  -4.5080000e-02
  -2.7560000e-02
  -1.2910000e-02
  -5.2400000e-03
   2.2890000e-02
   4.3570000e-02
   2.8570000e-02
   1.2670000e-02
   1.2690000e-02
   2.7970000e-02
   5.1330000e-02
   6.8600000e-02
   6.9150000e-02
   6.6460000e-02
   7.2330000e-02
   7.6410000e-02
   7.8640000e-02
   8.5820000e-02
   6.7860000e-02
   4.3290000e-02
   5.4620000e-02
   8.0580000e-02
   6.4100000e-02
   4.8370000e-02
   3.6850000e-02
   3.1860000e-02
   1.8780000e-02
   2.6510000e-02
   3.6110000e-02
   5.1800000e-03
  -1.6310000e-02
  -2.2980000e-02
  -3.3090000e-02
  -4.0910000e-02
  -3.8990000e-02
  -3.8930000e-02
  -2.1060000e-02
  -3.1420000e-02
  -4.7490000e-02
  -4.8090000e-02
  -6.2320000e-02
  -7.8610000e-02
  -6.1120000e-02
  -4.9110000e-02
  -2.7530000e-02
   9.8400000e-03
  -1.8210000e-02
  -2.1820000e-02
  -2.9600000e-03
   1.8100000e-02
   2.5220000e-02
   4.3130000e-02
   2.7530000e-02
   2.5200000e-03
   1.6000000e-04
   3.4330000e-02
   4.9400000e-03
   1.5680000e-02
   3.7730000e-02
   3.4410000e-02
   4.8040000e-02
   4.5190000e-02
   2.8190000e-02
   1.4480000e-02
   1.5960000e-02
  -1.2640000e-02
  -6.2000000e-03
   1.8010000e-02
   2.5800000e-02
   1.2450000e-02
   1.1820000e-02
   2.2500000e-03
  -1.3790000e-02
  -1.1000000e-04
  -2.4160000e-02
  -5.5400000e-03
  -4.4000000e-04
  -1.8210000e-02
  -2.1630000e-02
  -7.3500000e-03
   2.2800000e-03
  -1.8810000e-02
  -3.7450000e-02
  -3.8910000e-02
  -1.8320000e-02
  -2.7560000e-02
  -3.4140000e-02
  -4.2800000e-02
  -3.5180000e-02
  -4.0960000e-02
  -4.6910000e-02
  -5.2120000e-02
  -1.8180000e-02
  -1.1730000e-02
  -2.4540000e-02
  -3.4000000e-03
   3.0630000e-02
   3.7320000e-02
   4.9430000e-02
   6.6900000e-02
   4.7210000e-02
   2.3610000e-02
   1.5380000e-02
   2.1990000e-02
   2.5250000e-02
   4.8060000e-02
   2.2350000e-02
   3.5400000e-02
   3.4740000e-02
   8.1200000e-03
   3.2160000e-02
   6.5780000e-02
   7.1400000e-02
   2.4570000e-02
   3.2000000e-02
   3.7340000e-02
   2.7970000e-02
   1.9660000e-02
  -1.4500000e-02
  -1.4860000e-02
  -2.8300000e-02
  -2.6570000e-02
  -7.0200000e-03
  -2.3740000e-02
  -4.1540000e-02
  -3.5600000e-03
  -1.4300000e-03
  -2.7100000e-03
  -6.6900000e-03
  -2.0590000e-02
  -2.9640000e-02
  -4.7210000e-02
  -4.3810000e-02
  -1.5710000e-02
  -2.9610000e-02
  -1.2420000e-02
  -2.6600000e-03
   7.4600000e-03
   4.3320000e-02
   4.7130000e-02
   3.7840000e-02
   3.9700000e-02
   5.5800000e-02
   4.6970000e-02
   4.9960000e-02
   3.9510000e-02
   1.1190000e-02
   5.0940000e-02
   3.2270000e-02
   2.6180000e-02
   2.7250000e-02
   2.1330000e-02
   4.3730000e-02
   1.5660000e-02
   3.2760000e-02
   5.9250000e-02
   6.5910000e-02
   2.7640000e-02
   2.6160000e-02
   2.6020000e-02
   1.4300000e-03
  -1.9220000e-02
  -1.8370000e-02
  -3.3480000e-02
  -4.8010000e-02
  -3.5510000e-02
  -4.4060000e-02
  -9.4900000e-03
   1.9600000e-02
   2.8190000e-02
   4.5800000e-03
  -9.8700000e-03
   4.1000000e-04
  -3.4790000e-02
  -4.2880000e-02
  -3.0980000e-02
  -1.7300000e-02
  -1.2910000e-02
  -1.5330000e-02
  -4.4720000e-02
  -1.6040000e-02
  -2.2370000e-02
  -2.1440000e-02
  -6.3100000e-03
   3.6960000e-02
   4.0850000e-02
   5.9660000e-02
   8.0280000e-02
   8.9770000e-02
   7.7790000e-02
   7.7760000e-02
   6.9260000e-02
   3.4110000e-02
   2.7940000e-02
   2.2240000e-02
   2.6790000e-02
   2.9910000e-02
   7.1340000e-02
   9.0950000e-02
   9.6050000e-02
   7.8390000e-02
   7.1180000e-02
   5.4040000e-02
   2.1660000e-02
   2.5860000e-02
   2.2350000e-02
   1.3680000e-02
   1.8210000e-02
   1.9630000e-02
   1.4040000e-02
  -1.3430000e-02
  -3.4930000e-02
  -5.4700000e-02
  -8.3130000e-02
  -9.8760000e-02
  -4.9080000e-02
  -4.6580000e-02
  -6.8850000e-02
  -6.8380000e-02
  -6.0430000e-02
  -7.8580000e-02
  -9.6320000e-02
  -8.9160000e-02
  -6.5580000e-02
  -7.4600000e-02
  -6.6630000e-02
  -8.4480000e-02
  -7.4960000e-02
  -3.3450000e-02
  -1.1200000e-03
   2.3880000e-02
   3.3970000e-02
   4.9080000e-02
   6.2950000e-02
   4.6860000e-02
   2.7090000e-02
   3.1780000e-02
   5.0310000e-02
   5.3630000e-02
   6.9500000e-02
   5.4510000e-02
   3.2710000e-02
   4.8860000e-02
   5.2230000e-02
   4.4470000e-02
   5.3770000e-02
   1.5130000e-02
   2.3720000e-02
   4.7300000e-02
   2.7800000e-02
   9.7100000e-03
   3.3010000e-02
   2.2290000e-02
  -1.5380000e-02
   1.7220000e-02
   1.1680000e-02
  -2.6730000e-02
  -5.5360000e-02
  -4.9300000e-02
  -5.9740000e-02
  -4.5290000e-02
  -6.3560000e-02
  -6.0050000e-02
  -4.4640000e-02
  -2.3360000e-02
  -5.2590000e-02
  -4.9110000e-02
  -4.6010000e-02
  -5.2290000e-02
  -3.7920000e-02
  -1.7580000e-02
   4.9900000e-03
   6.0900000e-03
  -1.3520000e-02
   4.9100000e-03
   1.0940000e-02
   1.2420000e-02
   2.9150000e-02
   3.3480000e-02
   6.2210000e-02
   6.0680000e-02
   9.2100000e-02
   8.5330000e-02
   8.1050000e-02
   7.1040000e-02
   4.4970000e-02
   4.8010000e-02
   2.4240000e-02
   9.4000000e-03
   2.5250000e-02
   4.5730000e-02
   7.2740000e-02
   1.1030000e-01
   9.0670000e-02
   8.9710000e-02
   4.7190000e-02
   4.0110000e-02
   7.4900000e-03
  -2.7660000e-02
  -1.9380000e-02
  -6.8500000e-03
  -8.3600000e-03
  -3.8360000e-02
  -4.7520000e-02
  -4.5820000e-02
  -3.6440000e-02
  -4.1810000e-02
  -6.3280000e-02
  -2.9750000e-02
  -3.8280000e-02
  -7.0790000e-02
  -7.5890000e-02
  -7.7980000e-02
  -7.9430000e-02
  -6.2650000e-02
  -6.4080000e-02
  -5.4180000e-02
  -4.4120000e-02
  -3.9800000e-03
  -1.5660000e-02
  -1.8700000e-02
   1.0640000e-02
  -7.8100000e-03
   2.2430000e-02
   1.5960000e-02
   1.9880000e-02
   1.9410000e-02
   3.1170000e-02
   2.4760000e-02
   9.4300000e-03
   4.8610000e-02
   3.6190000e-02
   5.9030000e-02
   4.9330000e-02
   5.3110000e-02
   4.4800000e-02
   3.6580000e-02
   6.5280000e-02
   4.6420000e-02
   3.1370000e-02
   1.4920000e-02
   2.8210000e-02
  -2.1060000e-02
  -3.1300000e-03
  -2.8380000e-02
  -1.7550000e-02
   1.0390000e-02
   6.6100000e-03
   4.4400000e-03
   4.8500000e-03
  -1.3410000e-02
  -2.4020000e-02
  -1.7630000e-02
  -1.4800000e-03
  -1.0890000e-02
  -2.2780000e-02
  -1.5850000e-02
  -6.3100000e-03
  -2.1390000e-02
  -5.3200000e-03
   1.0720000e-02
   1.6480000e-02
   4.8560000e-02
   6.9230000e-02
   7.4140000e-02
   5.9610000e-02
   5.4230000e-02
   2.8300000e-02
   1.7470000e-02
   1.6340000e-02
   1.4300000e-03
   3.4770000e-02
   4.8830000e-02
   5.2230000e-02
   6.4190000e-02
   6.7970000e-02
   5.2670000e-02
   5.7470000e-02
   7.3430000e-02
   6.2540000e-02
   5.1790000e-02
   6.2070000e-02
   1.9270000e-02
   2.2730000e-02
   4.2330000e-02
   2.5960000e-02
  -2.1100000e-03
  -1.7500000e-03
  -2.8020000e-02
  -4.2500000e-03
  -1.1160000e-02
  -2.9900000e-03
  -9.3000000e-04
  -5.8100000e-03
  -1.2860000e-02
  -2.8320000e-02
  -1.4890000e-02
  -3.3810000e-02
  -1.3190000e-02
  -1.7790000e-02
  -4.3950000e-02
  -5.6180000e-02
  -6.1030000e-02
  -6.5720000e-02
  -6.9310000e-02
  -8.4170000e-02
  -8.4530000e-02
  -5.6120000e-02
  -1.9630000e-02
   2.0370000e-02
   3.9870000e-02
   5.0200000e-02
   5.7060000e-02
   4.7950000e-02
   4.1130000e-02
   3.0790000e-02
   4.1950000e-02
   5.6020000e-02
   6.2870000e-02
   5.7740000e-02
   6.5750000e-02
   6.7500000e-02
   8.0600000e-03
   3.6580000e-02
   2.2260000e-02
   1.6920000e-02
   3.0130000e-02
   2.7120000e-02
   3.4300000e-02
   2.7090000e-02
   1.0640000e-02
   1.4480000e-02
   3.2000000e-02
   8.8800000e-03
  -2.8270000e-02
  -2.1440000e-02
  -4.1150000e-02
  -2.9970000e-02
  -2.0180000e-02
  -3.2240000e-02
  -6.1060000e-02
  -7.4710000e-02
  -6.4240000e-02
  -6.8550000e-02
  -4.6250000e-02
  -2.0370000e-02
  -2.1250000e-02
  -4.3980000e-02
  -2.9580000e-02
  -1.0670000e-02
  -4.7870000e-02
  -5.5580000e-02
  -5.4640000e-02
  -6.2510000e-02
  -2.3610000e-02
  -2.4920000e-02
   2.2200000e-03
   2.9670000e-02
   4.6060000e-02
   6.2620000e-02
   7.5670000e-02
   8.2060000e-02
   6.5560000e-02
   3.9760000e-02
   1.7500000e-03
  -1.1980000e-02
  -9.9000000e-03
   2.1410000e-02
   3.0790000e-02
   2.3310000e-02
   2.9560000e-02
   3.5920000e-02
   6.5000000e-03
   2.0650000e-02
   3.7650000e-02
  -3.7300000e-03
   2.2590000e-02
   1.2260000e-02
  -1.3540000e-02
  -5.9800000e-03
   1.6500000e-03
  -2.5120000e-02
  -1.4340000e-02
  -2.0260000e-02
  -2.4540000e-02
  -4.7930000e-02
  -3.8880000e-02
  -4.4580000e-02
  -5.3790000e-02
  -5.6150000e-02
  -5.9720000e-02
  -5.8730000e-02
  -6.6460000e-02
  -7.1510000e-02
  -5.3030000e-02
  -2.8490000e-02
  -1.3650000e-02
   5.3500000e-03
   2.1580000e-02
   5.2590000e-02
   7.1100000e-02
   6.9040000e-02
   4.6360000e-02
   6.1330000e-02
   5.1270000e-02
   2.4050000e-02
   6.7480000e-02
   9.0750000e-02
   8.1620000e-02
   5.9360000e-02
   4.7490000e-02
   4.0500000e-02
   4.8500000e-02
   5.7190000e-02
   7.8000000e-02
   8.8810000e-02
   5.2750000e-02
   7.5150000e-02
   4.4120000e-02
   3.3480000e-02
  -1.8600000e-03
  -2.3470000e-02
  -2.6160000e-02
  -5.2780000e-02
  -5.9420000e-02
  -3.8390000e-02
  -6.5580000e-02
  -5.0090000e-02
  -1.1240000e-02
  -4.0520000e-02
  -5.5930000e-02
  -7.0660000e-02
  -7.4190000e-02
  -1.0202000e-01
  -1.2275000e-01
  -1.1368000e-01
  -9.7750000e-02
  -9.9580000e-02
  -1.1041000e-01
  -1.2149000e-01
  -1.1494000e-01
  -7.2030000e-02
  -4.1460000e-02
  -3.0000000e-05
   1.4480000e-02
   3.0820000e-02
   5.0310000e-02
   5.5470000e-02
   6.2840000e-02
   4.7210000e-02
   5.6040000e-02
   2.3390000e-02
  -1.3570000e-02
   5.1300000e-03
   2.3500000e-02
   2.8900000e-02
   5.8150000e-02
   8.0690000e-02
   7.7680000e-02
   7.3810000e-02
   7.3620000e-02
   9.4570000e-02
   7.3290000e-02
   7.5950000e-02
   1.0076000e-01
   6.0210000e-02
   4.8580000e-02
   1.6200000e-02
   6.6100000e-03
  -1.2230000e-02
  -3.2190000e-02
  -3.5840000e-02
  -4.0140000e-02
  -4.9600000e-03
  -1.3760000e-02
  -3.4880000e-02
  -7.8200000e-02
  -5.3050000e-02
  -4.3510000e-02
  -4.9870000e-02
  -4.7980000e-02
  -3.6190000e-02
  -6.5720000e-02
  -7.2800000e-02
  -7.5180000e-02
  -5.8320000e-02
  -5.1300000e-02
  -4.6890000e-02
  -5.2200000e-02
  -3.1640000e-02
  -4.2800000e-03
  -3.4800000e-03
   1.1160000e-02
   3.3370000e-02
   7.4360000e-02
   9.6160000e-02
   7.8720000e-02
   6.4540000e-02
   6.2350000e-02
   6.9640000e-02
   7.0990000e-02
   4.3540000e-02
   3.4800000e-03
   2.2840000e-02
   2.2240000e-02
   4.8060000e-02
   5.5770000e-02
   3.5260000e-02
   4.6780000e-02
   3.1420000e-02
   1.2060000e-02
   7.5700000e-03
  -1.5770000e-02
  -4.7430000e-02
  -5.7720000e-02
  -3.7400000e-02
  -3.3940000e-02
  -4.7410000e-02
  -4.2200000e-02
  -4.9760000e-02
  -4.3050000e-02
  -3.5560000e-02
  -4.1260000e-02
  -4.3540000e-02
  -7.5210000e-02
  -7.3650000e-02
  -8.7190000e-02
  -8.8510000e-02
  -6.4730000e-02
  -5.8100000e-02
  -6.3280000e-02
  -4.7900000e-02
  -2.6510000e-02
  -2.0290000e-02
   7.0500000e-03
   1.7080000e-02
   5.1300000e-03
   4.7490000e-02
   6.6680000e-02
   5.7880000e-02
   5.2670000e-02
   6.0400000e-02
   1.4750000e-02
  -1.4150000e-02
   1.8040000e-02
   1.6970000e-02
   3.7950000e-02
   4.1100000e-02
   5.5880000e-02
   4.1510000e-02
   4.1700000e-02
   5.6650000e-02
   4.0390000e-02
   1.6510000e-02
   1.0940000e-02
  -3.7800000e-03
  -2.1250000e-02
  -3.8190000e-02
  -3.4300000e-02
  -3.7120000e-02
  -3.9730000e-02
  -3.3610000e-02
  -3.6140000e-02
  -5.3520000e-02
  -5.0120000e-02
  -3.6660000e-02
  -1.2610000e-02
  -3.4460000e-02
  -9.4300000e-03
  -2.8900000e-02
  -4.5540000e-02
  -7.3260000e-02
  -7.6170000e-02
  -6.1750000e-02
  -6.1690000e-02
  -6.6790000e-02
  -5.6450000e-02
  -2.9860000e-02
   5.1300000e-03
   9.2700000e-03
   3.2820000e-02
   5.6670000e-02
   5.9910000e-02
   5.6540000e-02
   1.9880000e-02
   3.9540000e-02
   5.7030000e-02
   3.0160000e-02
   2.9750000e-02
   4.5020000e-02
   4.7320000e-02
   2.7720000e-02
   4.0470000e-02
   7.0000000e-02
   4.8800000e-02
   3.1390000e-02
   3.4790000e-02
   4.0030000e-02
   3.2740000e-02
   1.3820000e-02
   1.2940000e-02
   7.2100000e-03
  -1.2480000e-02
   1.3200000e-03
  -4.5950000e-02
  -5.3680000e-02
  -1.8290000e-02
  -2.2700000e-02
  -4.8690000e-02
  -4.0520000e-02
  -3.4880000e-02
  -4.6690000e-02
  -6.6760000e-02
  -7.0220000e-02
  -7.7350000e-02
  -1.1036000e-01
  -1.0696000e-01
  -1.1464000e-01
  -9.5830000e-02
  -7.2380000e-02
  -5.6120000e-02
  -3.2460000e-02
  -1.1300000e-02
   1.6150000e-02
   5.2480000e-02
   6.2290000e-02
   4.2740000e-02
   3.8220000e-02
   5.2040000e-02
   4.4030000e-02
   5.5060000e-02
   5.6210000e-02
   4.1950000e-02
   5.3630000e-02
   3.7150000e-02
   5.5820000e-02
   7.1120000e-02
   6.3770000e-02
   4.0610000e-02
   5.9110000e-02
   8.4500000e-02
   8.6610000e-02
   7.7590000e-02
   5.1410000e-02
   5.8840000e-02
   6.4210000e-02
   3.8030000e-02
   2.3720000e-02
   5.5400000e-03
  -2.8620000e-02
  -2.1500000e-02
  -3.3970000e-02
  -3.6990000e-02
  -1.2610000e-02
  -1.1930000e-02
  -2.5310000e-02
  -3.5510000e-02
  -3.7180000e-02
  -1.7660000e-02
  -1.6970000e-02
  -1.6620000e-02
  -3.6410000e-02
  -4.6780000e-02
  -4.8230000e-02
  -2.8840000e-02
   3.8000000e-04
   4.3600000e-03
   1.0400000e-03
   1.5380000e-02
   4.5130000e-02
   6.7090000e-02
   7.2960000e-02
   5.7660000e-02
   7.0520000e-02
   7.1420000e-02
   7.2690000e-02
   5.7740000e-02
   7.3620000e-02
   7.7130000e-02
   7.4800000e-02
   6.9260000e-02
   6.5470000e-02
   7.4690000e-02
   7.4500000e-02
   8.7930000e-02
   9.5720000e-02
   9.8350000e-02
   8.0910000e-02
   6.9700000e-02
   6.4460000e-02
   3.1040000e-02
   8.0300000e-03
  -1.1020000e-02
  -1.6730000e-02
  -2.2180000e-02
  -2.8000000e-03
  -2.5910000e-02
  -1.1050000e-02
  -4.9870000e-02
  -3.7540000e-02
  -2.7560000e-02
  -2.7830000e-02
  -3.5420000e-02
  -5.2510000e-02
  -4.9110000e-02
  -6.8000000e-02
  -7.2300000e-02
  -6.0430000e-02
  -2.6540000e-02
  -1.9520000e-02
  -1.4420000e-02
   2.7400000e-03
   5.8400000e-03
   4.1070000e-02
   5.6810000e-02
   6.8190000e-02
   8.7460000e-02
   7.2110000e-02
   6.5390000e-02
   6.1200000e-02
   8.7190000e-02
   7.9680000e-02
   6.5090000e-02
   6.7150000e-02
   7.3860000e-02
   8.1190000e-02
   8.3520000e-02
   8.8670000e-02
   8.0580000e-02
   8.8700000e-02
   7.1340000e-02
   7.7790000e-02
   6.6680000e-02
   3.8880000e-02
   5.3330000e-02
   7.9400000e-02
   6.7830000e-02
   6.8820000e-02
   4.0410000e-02
   2.0730000e-02
   1.7000000e-02
   1.3850000e-02
   2.3330000e-02
  -1.7000000e-02
  -2.2840000e-02
  -1.8750000e-02
  -1.1460000e-02
  -2.1550000e-02
  -2.4270000e-02
  -1.1650000e-02
  -2.8710000e-02
  -4.4120000e-02
  -6.2180000e-02
  -4.7870000e-02
  -4.8450000e-02
  -7.0140000e-02
  -4.2360000e-02
  -2.5960000e-02
  -9.1000000e-03
   2.2460000e-02
   4.5600000e-02
   3.7950000e-02
   5.8840000e-02
   5.8040000e-02
   4.2140000e-02
   5.4120000e-02
   4.7100000e-02
   7.7650000e-02
   6.4210000e-02
   6.6190000e-02
   4.2550000e-02
   2.1300000e-02
   1.6480000e-02
   5.5580000e-02
   5.0260000e-02
   2.5060000e-02
   4.4120000e-02
   7.2740000e-02
   3.8960000e-02
  -2.0300000e-03
  -7.1300000e-03
  -2.0180000e-02
  -6.3910000e-02
  -8.5820000e-02
  -5.1220000e-02
  -7.3730000e-02
  -7.0880000e-02
  -2.9610000e-02
  -2.9720000e-02
  -5.1850000e-02
  -6.7420000e-02
  -4.8040000e-02
  -6.6520000e-02
  -7.7100000e-02
  -6.7750000e-02
  -5.5710000e-02
  -5.2090000e-02
  -6.0270000e-02
  -2.8410000e-02
  -3.1500000e-03
  -2.0800000e-03
   4.0030000e-02
   6.6490000e-02
   4.6580000e-02
   4.5160000e-02
   6.5040000e-02
   6.0540000e-02
   1.9770000e-02
   4.0360000e-02
   5.8370000e-02
   2.8410000e-02
   8.8230000e-02
   1.1675000e-01
   1.1617000e-01
   1.3207000e-01
   1.2009000e-01
   1.1677000e-01
   7.5130000e-02
   4.0690000e-02
   3.2930000e-02
   4.0940000e-02
   3.1750000e-02
   3.2930000e-02
   1.7900000e-02
   2.3220000e-02
   2.9560000e-02
   2.0810000e-02
   2.6290000e-02
  -7.3200000e-03
  -1.6940000e-02
  -2.1390000e-02
  -1.1570000e-02
   3.9800000e-03
  -1.0090000e-02
  -2.5750000e-02
  -4.9820000e-02
  -5.3520000e-02
  -1.3850000e-02
  -1.4590000e-02
  -3.4880000e-02
  -8.0340000e-02
  -6.0100000e-02
  -6.6850000e-02
  -6.5060000e-02
  -5.4670000e-02
  -5.1160000e-02
  -4.4390000e-02
  -4.0960000e-02
  -1.1900000e-02
   1.8750000e-02
   8.2000000e-03
   2.0450000e-02
   4.5160000e-02
   2.9010000e-02
   4.5460000e-02
   5.5330000e-02
   3.7950000e-02
   3.6160000e-02
   1.9990000e-02
   1.5000000e-02
   3.1370000e-02
   2.3630000e-02
   4.9080000e-02
   5.4340000e-02
   8.7000000e-02
   6.6570000e-02
   5.7330000e-02
   7.5180000e-02
   5.7740000e-02
   6.8740000e-02
   2.8190000e-02
  -7.8100000e-03
  -6.8300000e-03
  -9.7900000e-03
  -1.8780000e-02
  -2.5830000e-02
  -4.7020000e-02
  -4.2030000e-02
  -1.9300000e-02
  -3.8600000e-02
  -5.4840000e-02
  -6.7670000e-02
  -4.7790000e-02
  -7.2440000e-02
  -6.2900000e-02
  -7.5870000e-02
  -8.0530000e-02
  -9.7880000e-02
  -9.2180000e-02
  -4.3160000e-02
  -4.0410000e-02
   5.1800000e-03
   1.4090000e-02
   3.6470000e-02
   4.2110000e-02
   5.3330000e-02
   8.2450000e-02
   8.3790000e-02
   8.0200000e-02
   9.4320000e-02
   7.2690000e-02
   3.7590000e-02
   4.8170000e-02
   8.0880000e-02
   7.4800000e-02
   9.6270000e-02
   6.9590000e-02
   7.1200000e-02
   7.4500000e-02
   6.7780000e-02
   5.2260000e-02
   5.0260000e-02
   6.1770000e-02
   2.8270000e-02
   3.4160000e-02
   2.1000000e-02
  -2.6620000e-02
  -3.2930000e-02
  -2.9910000e-02
  -5.0890000e-02
  -3.1640000e-02
  -2.6400000e-02
  -3.7300000e-03
  -1.3270000e-02
  -2.6460000e-02
  -2.7910000e-02
  -1.1080000e-02
  -4.1540000e-02
  -4.7020000e-02
  -5.9000000e-02
  -7.3810000e-02
  -7.2360000e-02
  -6.0070000e-02
  -4.5460000e-02
  -1.3460000e-02
   2.3600000e-03
  -2.6900000e-03
   3.5100000e-02
   4.3490000e-02
   6.7420000e-02
   6.7040000e-02
   1.0221000e-01
   9.8130000e-02
   7.5890000e-02
   8.5850000e-02
   8.5740000e-02
   7.0520000e-02
   8.2670000e-02
   6.9010000e-02
   5.0590000e-02
   5.5360000e-02
   6.2050000e-02
   5.3580000e-02
   6.6190000e-02
   5.5330000e-02
   4.6500000e-02
   8.6500000e-02
   7.7430000e-02
   7.3890000e-02
   4.5900000e-02
   5.9420000e-02
   3.6520000e-02
  -2.9040000e-02
  -2.5500000e-02
  -3.6900000e-02
  -4.8640000e-02
  -3.8930000e-02
  -3.4790000e-02
  -7.5130000e-02
  -6.3470000e-02
  -6.6110000e-02
  -8.9600000e-02
  -6.7700000e-02
  -7.5020000e-02
  -5.9580000e-02
  -6.7610000e-02
  -8.0830000e-02
  -8.3270000e-02
  -7.9760000e-02
  -7.2580000e-02
  -6.6110000e-02
  -6.9120000e-02
  -4.4750000e-02
  -8.3100000e-03
   2.9610000e-02
   5.5410000e-02
   7.5290000e-02
   4.5270000e-02
   6.8380000e-02
   8.7820000e-02
   7.1310000e-02
   3.7320000e-02
   3.2050000e-02
   5.8180000e-02
   8.3820000e-02
   8.9660000e-02
   1.0855000e-01
   9.1770000e-02
   5.9940000e-02
   6.5580000e-02
   5.4120000e-02
   3.3610000e-02
   8.9900000e-03
   5.7600000e-03
   3.6000000e-04
  -2.7560000e-02
  -2.4870000e-02
   7.8400000e-03
  -2.4540000e-02
  -3.0710000e-02
  -2.9340000e-02
  -3.3670000e-02
  -4.2830000e-02
  -4.9820000e-02
  -3.2490000e-02
  -5.0610000e-02
  -7.1450000e-02
  -7.5240000e-02
  -8.8040000e-02
  -9.6240000e-02
  -9.4920000e-02
  -8.5850000e-02
  -9.1030000e-02
  -9.4210000e-02
  -8.0280000e-02
  -4.6250000e-02
  -4.4940000e-02
  -2.7090000e-02
   8.2000000e-03
   1.8320000e-02
   4.2800000e-02
   6.2270000e-02
   8.4480000e-02
   7.7950000e-02
   9.5090000e-02
   9.2950000e-02
   7.8960000e-02
   8.2280000e-02
   6.6430000e-02
   5.2480000e-02
   4.7050000e-02
   4.9740000e-02
   5.0780000e-02
   6.5560000e-02
   7.0350000e-02
   6.4950000e-02
   4.3290000e-02
   5.0260000e-02
   2.9530000e-02
   8.2000000e-04
  -1.3220000e-02
  -3.9920000e-02
  -2.8240000e-02
  -4.4440000e-02
  -2.3000000e-02
  -2.5500000e-02
  -2.6650000e-02
  -2.7100000e-03
  -2.4270000e-02
  -3.6710000e-02
  -3.4190000e-02
  -3.5620000e-02
  -1.2450000e-02
  -2.9670000e-02
  -6.5910000e-02
  -6.4680000e-02
  -6.5150000e-02
  -5.5910000e-02
  -4.8280000e-02
  -3.7700000e-02
  -4.2360000e-02
  -1.1080000e-02
   6.9400000e-03
   2.8020000e-02
   8.8920000e-02
   8.6120000e-02
   9.2810000e-02
   1.1505000e-01
   9.9450000e-02
   9.8760000e-02
   1.1091000e-01
   1.1302000e-01
   8.7660000e-02
   6.2760000e-02
   5.6760000e-02
   5.6020000e-02
   5.3140000e-02
   4.3180000e-02
   1.0485000e-01
   1.0685000e-01
   8.6200000e-02
   8.1400000e-02
   9.3300000e-02
   8.8780000e-02
   6.4100000e-02
   3.8660000e-02
   1.6510000e-02
   8.4700000e-03
   7.4000000e-04
  -2.4460000e-02
  -9.0200000e-03
  -5.6370000e-02
  -4.7160000e-02
  -4.5020000e-02
  -5.5080000e-02
  -9.2210000e-02
  -8.1460000e-02
  -6.3010000e-02
  -9.4100000e-02
  -8.0010000e-02
  -8.2280000e-02
  -9.3520000e-02
  -9.0230000e-02
  -9.6070000e-02
  -8.5240000e-02
  -6.1800000e-02
  -2.7010000e-02
  -2.9450000e-02
  -9.6200000e-03
   1.7550000e-02
   5.8540000e-02
   9.7390000e-02
   8.5220000e-02
   8.7240000e-02
   1.1387000e-01
   9.6210000e-02
   5.0450000e-02
   7.7320000e-02
   9.7660000e-02
   9.4130000e-02
   7.8800000e-02
   8.2530000e-02
   9.8540000e-02
   8.6640000e-02
   5.7580000e-02
   5.5930000e-02
   6.2100000e-02
   3.1530000e-02
  -2.3000000e-03
  -1.3410000e-02
  -2.5140000e-02
  -4.6910000e-02
  -5.0830000e-02
  -4.9190000e-02
  -3.8990000e-02
  -6.3560000e-02
  -7.6960000e-02
  -8.5300000e-02
  -7.3750000e-02
  -8.6940000e-02
  -7.5540000e-02
  -7.2630000e-02
  -9.8510000e-02
  -1.2925000e-01
  -1.3336000e-01
  -1.1077000e-01
  -1.0515000e-01
  -9.1410000e-02
  -8.2560000e-02
  -5.9500000e-02
  -3.6000000e-02
  -4.4360000e-02
   1.1300000e-02
   4.4280000e-02
   3.8190000e-02
   3.4790000e-02
   1.9140000e-02
   1.6510000e-02
   7.8400000e-03
   2.6490000e-02
   6.1940000e-02
   5.1520000e-02
   6.7450000e-02
   2.4460000e-02
  -4.2910000e-02
  -2.1100000e-03
  -2.6810000e-02
   3.3500000e-03
   5.5360000e-02
   5.5030000e-02
   6.0840000e-02
   6.3970000e-02
   8.5490000e-02
   4.8150000e-02
   2.8680000e-02
   4.5000000e-03
   8.4200000e-03
   7.7900000e-03
  -2.5500000e-02
  -3.7320000e-02
  -1.6230000e-02
  -2.9390000e-02
  -4.4390000e-02
  -5.3600000e-02
  -3.2820000e-02
  -2.8350000e-02
  -4.3730000e-02
  -5.2620000e-02
  -5.5440000e-02
  -4.8310000e-02
  -6.9260000e-02
  -8.2140000e-02
  -9.1030000e-02
  -6.5280000e-02
  -5.2670000e-02
  -4.0520000e-02
  -4.4400000e-03
  -2.1900000e-03
  -3.1800000e-03
   3.0210000e-02
   4.7270000e-02
   6.4350000e-02
   7.0140000e-02
   5.9360000e-02
   7.2520000e-02
   8.2640000e-02
   8.8340000e-02
   8.3600000e-02
   9.1300000e-02
   1.1625000e-01
   1.1732000e-01
   9.1880000e-02
   9.9280000e-02
   1.1609000e-01
   1.0334000e-01
   7.9430000e-02
   9.8320000e-02
   7.8330000e-02
   7.3370000e-02
   6.7560000e-02
   4.7870000e-02
   1.5080000e-02
  -3.7370000e-02
  -4.6970000e-02
  -1.0530000e-02
  -1.9000000e-04
  -3.2600000e-02
  -4.9900000e-02
  -3.4270000e-02
  -5.1630000e-02
  -5.3790000e-02
  -6.4820000e-02
  -3.7370000e-02
  -9.3250000e-02
  -1.1198000e-01
  -1.3761000e-01
  -1.3087000e-01
  -7.3290000e-02
  -6.6190000e-02
  -7.3650000e-02
  -7.1420000e-02
  -3.5640000e-02
   1.5400000e-03
   4.6910000e-02
   8.9820000e-02
   1.1222000e-01
   9.5800000e-02
   9.3740000e-02
   1.1022000e-01
   1.0635000e-01
   1.0356000e-01
   1.0663000e-01
   1.0485000e-01
   1.0967000e-01
   1.1389000e-01
   9.8570000e-02
   1.0169000e-01
   1.0370000e-01
   1.0954000e-01
   1.0871000e-01
   1.0710000e-01
   7.7150000e-02
   5.9690000e-02
   6.2130000e-02
   5.1790000e-02
   3.2550000e-02
   1.9990000e-02
   4.7000000e-04
  -9.2900000e-03
  -2.4020000e-02
  -3.3670000e-02
  -2.7010000e-02
  -4.8610000e-02
  -4.7080000e-02
  -5.0750000e-02
  -6.7750000e-02
  -6.0320000e-02
  -9.9860000e-02
  -1.0759000e-01
  -1.0468000e-01
  -8.5050000e-02
  -6.0540000e-02
  -2.9910000e-02
  -1.0830000e-02
  -2.0730000e-02
  -1.6370000e-02
   1.5100000e-03
   2.7660000e-02
   5.2970000e-02
   5.7410000e-02
   7.6630000e-02
   7.6440000e-02
   7.2800000e-02
   4.9520000e-02
   7.1950000e-02
   7.3120000e-02
   3.6710000e-02
   1.4310000e-02
   3.3010000e-02
   4.1950000e-02
   6.1580000e-02
   5.9990000e-02
   8.5270000e-02
   9.3880000e-02
   9.6700000e-02
   1.0372000e-01
   8.1380000e-02
   3.2490000e-02
  -6.0600000e-03
  -7.9200000e-03
  -1.8860000e-02
  -2.3690000e-02
  -3.2570000e-02
  -4.1900000e-03
  -2.0700000e-02
  -4.9650000e-02
  -3.5600000e-03
   3.1800000e-03
   1.0170000e-02
  -1.9300000e-02
  -3.8910000e-02
  -4.9870000e-02
  -3.4250000e-02
  -2.5770000e-02
  -2.6620000e-02
  -1.3600000e-02
  -5.3440000e-02
  -6.1550000e-02
  -3.9430000e-02
  -5.2670000e-02
  -6.8020000e-02
  -5.6670000e-02
  -9.9500000e-03
   4.7760000e-02
   6.1940000e-02
   7.6830000e-02
   6.4380000e-02
   6.9560000e-02
   5.7390000e-02
   4.1430000e-02
   4.3730000e-02
   6.2460000e-02
   8.8810000e-02
   7.9350000e-02
   7.1750000e-02
   6.4540000e-02
   3.5310000e-02
   3.1700000e-02
   5.8730000e-02
   8.0690000e-02
   7.3840000e-02
   8.0690000e-02
   9.6180000e-02
   8.3930000e-02
   2.3470000e-02
  -6.6600000e-03
  -1.0450000e-02
  -1.7330000e-02
   5.3500000e-03
  -1.7500000e-03
  -2.7420000e-02
  -2.4320000e-02
  -9.0800000e-03
  -5.2100000e-03
  -2.8710000e-02
  -2.6900000e-02
  -1.5000000e-02
  -3.6250000e-02
  -5.5440000e-02
  -6.8130000e-02
  -6.8820000e-02
  -6.2050000e-02
  -3.7210000e-02
  -3.7670000e-02
   4.8000000e-03
   1.7220000e-02
   3.0430000e-02
   4.2960000e-02
   5.7630000e-02
   5.9990000e-02
   5.2040000e-02
   2.7580000e-02
   4.8390000e-02
   3.3200000e-02
  -8.8300000e-03
   5.2700000e-02
   3.9400000e-02
   4.8610000e-02
  -5.9200000e-03
   1.0230000e-02
   6.1100000e-03
   2.6600000e-03
   3.2600000e-03
   1.7110000e-02
   5.3930000e-02
   5.0610000e-02
   5.9170000e-02
   3.8910000e-02
   1.4500000e-02
  -4.1700000e-03
  -5.4300000e-03
  -1.3570000e-02
  -1.5220000e-02
  -2.1500000e-02
  -4.9900000e-02
  -6.5940000e-02
  -4.2420000e-02
  -4.1570000e-02
  -3.8990000e-02
  -2.4730000e-02
  -4.9900000e-02
  -8.2690000e-02
  -8.1430000e-02
  -7.2710000e-02
  -8.3600000e-02
  -1.2034000e-01
  -1.1631000e-01
  -1.0869000e-01
  -7.6390000e-02
  -4.8580000e-02
  -3.6770000e-02
  -1.0040000e-02
   2.4350000e-02
   3.4960000e-02
   3.9980000e-02
   5.4920000e-02
   7.5240000e-02
   6.4570000e-02
   8.5300000e-02
   8.4690000e-02
   6.1910000e-02
   8.1460000e-02
   5.1330000e-02
   5.1080000e-02
   5.9280000e-02
   4.9680000e-02
   4.5980000e-02
   4.5460000e-02
   6.1720000e-02
   5.1520000e-02
   4.3790000e-02
   2.5610000e-02
   4.2720000e-02
   4.3050000e-02
   1.9520000e-02
  -7.7900000e-03
  -2.6790000e-02
  -3.8520000e-02
  -6.4980000e-02
  -4.8480000e-02
  -3.9040000e-02
  -5.5490000e-02
  -5.0040000e-02
  -3.0960000e-02
  -3.7040000e-02
  -6.4160000e-02
  -4.5130000e-02
  -4.1980000e-02
  -8.0030000e-02
  -9.5390000e-02
  -1.2089000e-01
  -1.3438000e-01
  -9.8050000e-02
  -9.8100000e-02
  -6.4050000e-02
  -6.3530000e-02
  -4.5540000e-02
   3.3560000e-02
   4.4580000e-02
   5.3960000e-02
   7.7810000e-02
   6.9150000e-02
   7.7620000e-02
   5.8620000e-02
   6.5500000e-02
   6.8410000e-02
   3.9180000e-02
   5.5520000e-02
   5.4840000e-02
   4.8780000e-02
   2.6980000e-02
   4.1870000e-02
   7.1890000e-02
   8.0800000e-02
   4.4940000e-02
   2.1110000e-02
   2.4460000e-02
   2.5170000e-02
   8.8300000e-03
  -9.6200000e-03
  -3.1060000e-02
  -5.2620000e-02
  -4.9020000e-02
  -2.7750000e-02
  -1.3740000e-02
  -4.8580000e-02
  -6.1880000e-02
  -6.1170000e-02
  -6.4190000e-02
  -8.7000000e-02
  -8.5160000e-02
  -9.9990000e-02
  -8.8530000e-02
  -8.7460000e-02
  -1.0556000e-01
  -8.6700000e-02
  -8.6010000e-02
  -8.1730000e-02
  -5.5140000e-02
  -3.7560000e-02
  -4.6670000e-02
  -1.8120000e-02
  -1.3850000e-02
   1.6480000e-02
   6.1770000e-02
   6.2100000e-02
   3.8410000e-02
   7.2660000e-02
   5.1770000e-02
   6.6050000e-02
   7.5290000e-02
   8.2560000e-02
   8.9190000e-02
   8.2860000e-02
   8.3350000e-02
   7.3510000e-02
   3.8410000e-02
   1.8400000e-02
   2.8900000e-02
   3.9870000e-02
   4.2310000e-02
   1.5300000e-02
   2.9060000e-02
   3.0190000e-02
   7.8400000e-03
  -1.7300000e-03
  -2.1250000e-02
  -1.8480000e-02
  -4.7210000e-02
  -7.8330000e-02
  -3.7070000e-02
  -4.0410000e-02
  -5.0340000e-02
  -2.5440000e-02
  -1.1600000e-02
  -4.4360000e-02
  -6.2840000e-02
  -7.0520000e-02
  -9.1470000e-02
  -1.0356000e-01
  -1.2031000e-01
  -9.6730000e-02
  -7.9620000e-02
  -8.3300000e-02
  -6.8190000e-02
  -3.1310000e-02
  -1.4920000e-02
   1.6370000e-02
   5.2860000e-02
   7.7320000e-02
   6.3690000e-02
   6.8190000e-02
   5.8590000e-02
   6.8000000e-02
   5.7880000e-02
   6.7750000e-02
   9.2700000e-02
   6.1090000e-02
   7.8090000e-02
   1.0051000e-01
   8.0750000e-02
   7.2600000e-02
   4.1400000e-02
   6.7970000e-02
   6.8760000e-02
   5.4400000e-02
   6.8130000e-02
   3.7840000e-02
  -8.8800000e-03
  -1.5980000e-02
  -2.9260000e-02
  -5.7360000e-02
  -6.7390000e-02
  -3.7010000e-02
  -6.8240000e-02
  -9.6650000e-02
  -5.6810000e-02
  -4.6470000e-02
  -5.8430000e-02
  -9.7200000e-02
  -9.5000000e-02
  -9.6350000e-02
  -1.1428000e-01
  -1.2771000e-01
  -1.3410000e-01
  -1.4340000e-01
  -1.5014000e-01
  -1.1332000e-01
  -6.5260000e-02
  -5.1160000e-02
  -2.6710000e-02
   1.6530000e-02
   6.9070000e-02
   1.0712000e-01
   1.1834000e-01
   1.0145000e-01
   1.0682000e-01
   1.3599000e-01
   1.3073000e-01
   1.0276000e-01
   1.1551000e-01
   1.1173000e-01
   8.0530000e-02
   8.4420000e-02
   1.0326000e-01
   1.0293000e-01
   7.5320000e-02
   9.1360000e-02
   1.0112000e-01
   7.7870000e-02
   6.0210000e-02
   3.8960000e-02
   3.7840000e-02
   3.4960000e-02
   2.4700000e-02
   5.9500000e-03
  -1.1650000e-02
  -3.2790000e-02
  -4.2030000e-02
  -2.3360000e-02
  -1.3630000e-02
  -1.9220000e-02
  -3.0520000e-02
  -2.8620000e-02
  -4.4530000e-02
  -6.7640000e-02
  -6.7310000e-02
  -7.0660000e-02
  -8.0470000e-02
  -7.1950000e-02
  -6.9530000e-02
  -7.1860000e-02
  -6.9590000e-02
  -8.1790000e-02
  -6.7450000e-02
  -4.3430000e-02
  -1.0310000e-02
   3.8080000e-02
   5.2860000e-02
   7.4330000e-02
   9.5420000e-02
   8.2280000e-02
   9.9420000e-02
   7.5870000e-02
   7.9810000e-02
   5.8890000e-02
   7.2740000e-02
   7.5480000e-02
   7.1890000e-02
   1.2459000e-01
   1.1642000e-01
   1.0679000e-01
   1.0635000e-01
   8.9250000e-02
   6.8870000e-02
   5.5520000e-02
   4.5790000e-02
   2.8620000e-02
  -2.0800000e-03
  -1.8070000e-02
  -2.3940000e-02
  -4.0990000e-02
  -1.5820000e-02
  -1.6200000e-02
  -4.2470000e-02
  -3.1810000e-02
  -2.3440000e-02
  -3.5730000e-02
  -6.2400000e-02
  -4.4880000e-02
  -6.2920000e-02
  -8.1190000e-02
  -1.0594000e-01
  -1.1222000e-01
  -1.1019000e-01
  -1.1132000e-01
  -1.1225000e-01
  -9.4400000e-02
  -6.2950000e-02
  -4.5870000e-02
  -3.5100000e-02
   4.4400000e-03
   4.0330000e-02
   6.3090000e-02
   6.9310000e-02
   8.1400000e-02
   8.8200000e-02
   7.8530000e-02
   7.5370000e-02
   7.0330000e-02
   8.3380000e-02
   6.9010000e-02
   6.7910000e-02
   7.5700000e-02
   8.9410000e-02
   5.8840000e-02
   4.0250000e-02
   6.1940000e-02
   6.6020000e-02
   6.6930000e-02
   4.4990000e-02
   3.5040000e-02
   2.9530000e-02
   3.6050000e-02
   1.8420000e-02
   2.3200000e-02
  -1.1000000e-03
  -3.1010000e-02
  -4.0960000e-02
  -1.9140000e-02
  -3.7650000e-02
  -5.2700000e-02
  -6.4950000e-02
  -6.2920000e-02
  -5.7000000e-02
  -8.0830000e-02
  -8.1840000e-02
  -9.1850000e-02
  -1.1790000e-01
  -1.0874000e-01
  -1.1302000e-01
  -1.2316000e-01
  -1.1963000e-01
  -6.1310000e-02
  -2.6460000e-02
  -2.7970000e-02
  -8.2000000e-04
   3.5310000e-02
   6.5610000e-02
   7.4740000e-02
   7.9790000e-02
   8.5430000e-02
   7.1700000e-02
   5.6950000e-02
   6.5970000e-02
   4.7190000e-02
   8.3430000e-02
   9.7660000e-02
   8.6640000e-02
   7.2900000e-02
   5.9630000e-02
   6.7970000e-02
   5.3470000e-02
   4.5430000e-02
   3.1170000e-02
   2.6050000e-02
   4.1980000e-02
   2.4900000e-02
  -9.6800000e-03
  -8.2800000e-03
  -3.3400000e-02
  -4.7350000e-02
  -1.2720000e-02
  -3.3180000e-02
  -6.2460000e-02
  -2.1390000e-02
  -8.8300000e-03
  -5.9220000e-02
  -8.9520000e-02
  -6.8410000e-02
  -6.6020000e-02
  -9.5910000e-02
  -9.0860000e-02
  -8.9960000e-02
  -9.6700000e-02
  -9.5550000e-02
  -7.3810000e-02
  -6.5340000e-02
  -1.9380000e-02
   3.1000000e-03
   7.8100000e-03
   3.6770000e-02
   3.7510000e-02
   7.9650000e-02
   1.0847000e-01
   1.0926000e-01
   1.1535000e-01
   1.0819000e-01
   1.0816000e-01
   6.1550000e-02
   5.6180000e-02
   3.8910000e-02
   5.5880000e-02
   5.3900000e-02
   8.8340000e-02
   8.5130000e-02
   7.4800000e-02
   9.7010000e-02
   9.7390000e-02
   8.0770000e-02
   8.6420000e-02
   7.4190000e-02
   4.3210000e-02
   1.3050000e-02
  -4.1100000e-03
  -7.0500000e-03
  -2.1900000e-03
  -7.1300000e-03
  -2.7310000e-02
  -2.2810000e-02
   7.6800000e-03
  -2.7230000e-02
  -7.0850000e-02
  -5.5550000e-02
  -3.4250000e-02
  -8.0470000e-02
  -1.0970000e-01
  -1.2579000e-01
  -1.3588000e-01
  -1.3860000e-01
  -1.3712000e-01
  -1.3906000e-01
  -1.3797000e-01
  -1.2711000e-01
  -1.1102000e-01
  -1.0287000e-01
  -2.8650000e-02
   2.2150000e-02
   4.8370000e-02
   6.2100000e-02
   6.6300000e-02
   5.5910000e-02
   7.3150000e-02
   5.3160000e-02
   2.9340000e-02
   7.4410000e-02
   9.4400000e-02
   7.8090000e-02
   7.9920000e-02
   9.9030000e-02
   9.2760000e-02
   7.7400000e-02
   9.7940000e-02
   1.1126000e-01
   1.1080000e-01
   7.1860000e-02
   7.4990000e-02
   8.7630000e-02
   5.2040000e-02
   2.8080000e-02
   1.9500000e-03
   8.2000000e-03
  -7.4000000e-03
   1.0800000e-02
   1.5000000e-02
  -2.3280000e-02
  -2.8350000e-02
  -2.9420000e-02
  -6.7400000e-03
  -1.2720000e-02
  -2.9530000e-02
  -2.3690000e-02
  -1.5050000e-02
  -5.2590000e-02
  -7.2600000e-02
  -7.0350000e-02
  -6.1990000e-02
  -6.4100000e-02
  -5.3990000e-02
  -5.5410000e-02
  -3.5640000e-02
   7.7000000e-03
   3.5040000e-02
   3.7010000e-02
   4.5400000e-02
   5.3710000e-02
   6.3450000e-02
   6.4930000e-02
   5.9800000e-02
   8.5130000e-02
   7.4250000e-02
   5.5990000e-02
   6.9450000e-02
   6.4710000e-02
   7.7100000e-02
   6.6790000e-02
   5.8950000e-02
   7.4660000e-02
   6.4210000e-02
   8.8700000e-02
   7.5620000e-02
   8.6720000e-02
   6.4270000e-02
   1.5570000e-02
  -6.2500000e-03
  -4.9900000e-03
  -3.7300000e-03
  -3.5400000e-03
  -3.7730000e-02
  -1.4480000e-02
  -2.1930000e-02
  -2.9940000e-02
  -4.0910000e-02
  -1.6230000e-02
  -1.3270000e-02
  -4.6360000e-02
  -6.5670000e-02
  -9.9390000e-02
  -9.1470000e-02
  -8.7520000e-02
  -1.1184000e-01
  -1.0060000e-01
  -9.4480000e-02
  -9.7120000e-02
  -5.7280000e-02
  -4.9270000e-02
  -2.2480000e-02
   2.4350000e-02
   4.0660000e-02
   5.2400000e-02
   5.8810000e-02
   6.2790000e-02
   4.1130000e-02
   5.7720000e-02
   6.0160000e-02
   6.4820000e-02
   3.1530000e-02
   1.2010000e-02
   5.4260000e-02
   4.5350000e-02
   3.9020000e-02
   1.9440000e-02
   5.2700000e-02
   3.9350000e-02
   4.1790000e-02
   4.2140000e-02
   2.2180000e-02
   2.2070000e-02
   1.0610000e-02
   7.1000000e-04
  -2.3600000e-03
  -3.1780000e-02
  -5.3680000e-02
  -4.3460000e-02
  -4.5840000e-02
  -3.7920000e-02
  -4.2530000e-02
  -5.0200000e-02
  -5.1770000e-02
  -5.4120000e-02
  -5.8590000e-02
  -7.5100000e-02
  -9.7220000e-02
  -9.2840000e-02
  -7.3150000e-02
  -6.6380000e-02
  -8.0500000e-02
  -7.3290000e-02
  -5.9330000e-02
  -5.0370000e-02
  -3.9290000e-02
  -3.3500000e-03
   2.2760000e-02
   7.8000000e-02
   9.9090000e-02
   8.6230000e-02
   8.4310000e-02
   8.6500000e-02
   8.1490000e-02
   7.5950000e-02
   6.8740000e-02
   6.8740000e-02
   8.7630000e-02
   9.1660000e-02
   9.2590000e-02
   1.1209000e-01
   9.3500000e-02
   7.1780000e-02
   7.9700000e-02
   6.0370000e-02
   5.6210000e-02
   4.1370000e-02
   7.1070000e-02
   8.6200000e-02
   4.9490000e-02
   5.8670000e-02
   4.2610000e-02
   1.6200000e-03
  -2.5500000e-03
  -1.0120000e-02
  -8.0000000e-05
   7.1300000e-03
  -6.3300000e-03
  -2.7200000e-02
  -6.7200000e-03
  -2.4320000e-02
  -5.1980000e-02
  -5.2510000e-02
  -7.0220000e-02
  -7.4880000e-02
  -8.2560000e-02
  -7.6910000e-02
  -4.7630000e-02
  -4.7930000e-02
  -2.6710000e-02
   2.1550000e-02
   7.2580000e-02
   8.3410000e-02
   9.7310000e-02
   8.4580000e-02
   8.1620000e-02
   6.9480000e-02
   5.9280000e-02
   6.2130000e-02
   4.2060000e-02
   7.7350000e-02
   6.0270000e-02
   5.8980000e-02
   8.2780000e-02
   8.7740000e-02
   7.6740000e-02
   9.3440000e-02
   1.0893000e-01
   9.3060000e-02
   9.0590000e-02
   1.2012000e-01
   1.0427000e-01
   7.5450000e-02
   3.6360000e-02
   3.8300000e-02
  -8.3100000e-03
  -2.9060000e-02
  -1.6000000e-04
  -1.7880000e-02
  -1.7300000e-02
  -5.4600000e-03
  -1.0340000e-02
  -3.8910000e-02
  -4.2360000e-02
  -3.9980000e-02
  -6.9750000e-02
  -4.3270000e-02
  -2.8950000e-02
  -4.3510000e-02
  -4.8200000e-02
  -5.5880000e-02
  -4.0550000e-02
  -4.1760000e-02
  -4.2170000e-02
  -3.4250000e-02
  -2.8430000e-02
   3.0200000e-03
   3.3970000e-02
   4.3130000e-02
   7.3510000e-02
   6.6980000e-02
   6.9340000e-02
   7.4330000e-02
   6.2840000e-02
   3.3120000e-02
   4.5240000e-02
   5.0970000e-02
   4.9760000e-02
   4.2220000e-02
   6.6630000e-02
   7.2660000e-02
   6.1750000e-02
   5.4970000e-02
   5.1930000e-02
   1.0890000e-02
   1.0040000e-02
  -4.3900000e-03
  -3.5450000e-02
  -5.2200000e-02
  -4.8060000e-02
  -7.1860000e-02
  -5.3140000e-02
  -7.6630000e-02
  -4.2220000e-02
  -3.8520000e-02
  -3.7000000e-03
  -2.5500000e-02
  -6.2490000e-02
  -5.2620000e-02
  -5.1680000e-02
  -8.4260000e-02
  -8.9410000e-02
  -5.9500000e-02
  -5.8070000e-02
  -6.3860000e-02
  -7.3400000e-02
  -8.3570000e-02
  -7.6800000e-02
  -5.5140000e-02
  -1.8620000e-02
   2.0040000e-02
   4.2770000e-02
   6.4100000e-02
   7.6500000e-02
   6.1090000e-02
   6.8130000e-02
   6.8930000e-02
   6.3530000e-02
   7.4600000e-02
   5.7280000e-02
   8.5760000e-02
   7.1750000e-02
   8.4280000e-02
   7.8330000e-02
   7.6550000e-02
   6.4760000e-02
   5.5030000e-02
   7.5320000e-02
   4.8780000e-02
   6.5340000e-02
   4.7020000e-02
   4.5100000e-02
   1.6310000e-02
  -2.1170000e-02
  -2.4790000e-02
  -4.6360000e-02
  -6.2710000e-02
  -5.9220000e-02
  -7.4520000e-02
  -8.3930000e-02
  -6.6960000e-02
  -5.8290000e-02
  -2.7910000e-02
  -5.1490000e-02
  -7.3750000e-02
  -6.3140000e-02
  -8.5430000e-02
  -7.7810000e-02
  -6.8710000e-02
  -7.7870000e-02
  -5.9740000e-02
  -6.2050000e-02
  -3.1260000e-02
  -2.0450000e-02
  -2.2890000e-02
   1.0140000e-02
   2.7610000e-02
   5.0780000e-02
   7.6740000e-02
   9.2510000e-02
   1.0112000e-01
   1.2966000e-01
   1.2481000e-01
   1.0021000e-01
   8.4750000e-02
   4.9410000e-02
   5.7850000e-02
   4.3980000e-02
   3.5230000e-02
   4.9600000e-02
   6.7590000e-02
