# Supplementary material for: A Novel Classification Method for Flutter Signals Based on the CNN and STFT
Source: Hindawi journal article supplement (doi:10.1155/2019/9375437), 2019-04-09
Supplement: f1 [file 9375437.f1.zip › 01_25_z20.0_20channel.txt]

  -2.5000000e-03
   4.9400000e-03
  -1.8840000e-02
  -5.5300000e-02
  -3.8470000e-02
  -3.8630000e-02
  -1.7490000e-02
  -8.4700000e-03
   1.9000000e-02
  -1.1500000e-03
   3.4300000e-02
   2.8320000e-02
  -2.2620000e-02
   1.7360000e-02
   4.2200000e-03
  -3.6080000e-02
  -1.2910000e-02
  -7.9200000e-03
  -5.4890000e-02
  -3.3970000e-02
  -4.3570000e-02
  -2.4650000e-02
  -2.9390000e-02
   7.6500000e-03
   4.3680000e-02
   3.9100000e-02
   2.6760000e-02
   5.5490000e-02
   1.0860000e-02
   5.4800000e-03
   2.6270000e-02
   4.0300000e-03
   2.3610000e-02
   7.7070000e-02
   1.9080000e-02
   4.4090000e-02
   8.2010000e-02
   5.9690000e-02
   6.3100000e-03
   2.0120000e-02
   3.2930000e-02
  -3.8000000e-04
   1.5080000e-02
  -6.0000000e-03
  -1.4420000e-02
   2.2890000e-02
   2.9560000e-02
   6.9500000e-02
   6.3470000e-02
   3.6820000e-02
   6.4080000e-02
   4.0300000e-02
   2.8730000e-02
   6.2500000e-03
  -3.0000000e-05
  -2.2500000e-03
  -6.7200000e-03
  -2.4540000e-02
  -2.0400000e-02
  -4.9570000e-02
  -3.3420000e-02
   6.0300000e-03
  -5.8540000e-02
   2.3600000e-03
   3.3940000e-02
   1.9910000e-02
   5.6800000e-03
   2.1630000e-02
  -1.8730000e-02
  -2.0890000e-02
  -1.2100000e-03
  -6.6870000e-02
  -6.1690000e-02
  -1.3680000e-02
   2.1100000e-03
  -3.7540000e-02
  -5.8000000e-04
   3.1670000e-02
   1.9490000e-02
  -1.3200000e-03
   1.3680000e-02
   4.5400000e-02
  -6.8500000e-03
   1.1840000e-02
   9.9420000e-02
   5.2310000e-02
  -1.7470000e-02
   2.2350000e-02
   4.6580000e-02
   4.3490000e-02
   9.9800000e-03
   5.3630000e-02
   4.6910000e-02
   5.0860000e-02
   7.8830000e-02
   2.9090000e-02
   9.6620000e-02
   6.3860000e-02
   6.5450000e-02
  -1.5270000e-02
   2.8320000e-02
   3.7560000e-02
  -2.5140000e-02
   7.5400000e-03
  -7.4000000e-04
   1.7160000e-02
   3.8910000e-02
   2.9090000e-02
  -5.5900000e-03
   4.4400000e-03
   2.1000000e-02
  -3.8400000e-03
   9.4300000e-03
   3.5100000e-02
  -2.9340000e-02
  -1.9380000e-02
   1.3240000e-02
  -1.1350000e-02
  -5.8700000e-02
  -4.6010000e-02
  -1.9110000e-02
  -3.2190000e-02
  -3.1260000e-02
  -5.1190000e-02
   1.7850000e-02
  -1.2600000e-03
   2.7830000e-02
   3.6490000e-02
   2.8100000e-02
   3.1390000e-02
  -2.3500000e-02
   1.8480000e-02
   1.8010000e-02
   1.1820000e-02
   2.2800000e-03
  -3.6160000e-02
   1.0750000e-02
   1.9700000e-03
  -1.3270000e-02
  -4.5800000e-03
   1.0580000e-02
   3.9670000e-02
   1.2390000e-02
   1.8230000e-02
   3.5970000e-02
   2.7560000e-02
   2.8540000e-02
   5.0480000e-02
   5.2780000e-02
   9.1930000e-02
   5.7690000e-02
   2.2650000e-02
   1.0389000e-01
   7.3890000e-02
   6.1280000e-02
   4.2910000e-02
   7.0330000e-02
   2.2240000e-02
  -1.1980000e-02
   1.1630000e-02
   2.6540000e-02
   5.1300000e-03
  -3.6700000e-03
   1.2370000e-02
   7.1100000e-02
   6.5940000e-02
   3.8110000e-02
   4.7190000e-02
   3.5530000e-02
   6.2540000e-02
  -3.4270000e-02
  -4.3540000e-02
   2.2000000e-04
  -5.1900000e-02
  -9.4370000e-02
  -8.0800000e-02
  -3.6030000e-02
  -4.4360000e-02
  -8.0860000e-02
  -3.0000000e-05
  -1.4810000e-02
  -2.6270000e-02
  -4.6010000e-02
  -1.7820000e-02
   2.0700000e-02
  -4.4700000e-03
   1.6810000e-02
  -2.2200000e-03
   4.5240000e-02
   5.0040000e-02
   1.7470000e-02
   1.8750000e-02
  -2.3940000e-02
  -1.5740000e-02
  -1.5600000e-03
  -2.3140000e-02
   1.5110000e-02
  -3.4820000e-02
   4.0280000e-02
   8.5300000e-02
   1.0759000e-01
   5.9630000e-02
   5.8540000e-02
   1.0082000e-01
   6.9780000e-02
   6.2320000e-02
   2.1630000e-02
   2.5000000e-03
   2.5010000e-02
   4.1650000e-02
  -3.6000000e-04
  -3.1000000e-03
   1.8370000e-02
   1.4860000e-02
   1.4590000e-02
  -3.0460000e-02
   3.6740000e-02
   4.4140000e-02
   1.7710000e-02
   4.9960000e-02
   7.1200000e-02
   8.5820000e-02
   9.9300000e-03
   5.6340000e-02
   3.4930000e-02
  -2.9940000e-02
  -3.3830000e-02
  -2.9390000e-02
  -4.8640000e-02
  -3.5810000e-02
  -6.5470000e-02
  -2.0430000e-02
   1.2150000e-02
  -2.5200000e-03
   3.7340000e-02
   5.2090000e-02
   3.8520000e-02
   4.4170000e-02
  -1.5460000e-02
   2.7280000e-02
  -4.5130000e-02
  -4.3650000e-02
  -4.7650000e-02
  -8.2010000e-02
  -5.4860000e-02
  -5.2780000e-02
  -2.5170000e-02
  -5.8840000e-02
  -2.1000000e-02
   4.0880000e-02
   2.1080000e-02
   1.4260000e-02
   3.9240000e-02
   4.0000000e-02
   3.1090000e-02
   1.9220000e-02
   7.7210000e-02
   8.1600000e-02
   7.7650000e-02
   8.3950000e-02
   8.9790000e-02
   4.3320000e-02
   7.7600000e-03
   2.0620000e-02
  -2.5500000e-03
  -1.9140000e-02
   1.8530000e-02
   3.8410000e-02
   1.9800000e-02
   3.2350000e-02
   4.5160000e-02
   8.5900000e-02
   5.0530000e-02
   6.8520000e-02
   3.6300000e-02
   3.2380000e-02
   2.0400000e-02
   2.3690000e-02
  -1.4860000e-02
  -2.3610000e-02
   3.2380000e-02
  -5.2290000e-02
  -1.5600000e-02
  -3.6960000e-02
  -7.8740000e-02
  -1.5880000e-02
  -4.0900000e-03
  -7.3700000e-02
  -1.0120000e-02
   3.6630000e-02
   4.8800000e-03
  -2.9830000e-02
   4.9400000e-03
   3.4220000e-02
  -1.4860000e-02
   3.0300000e-02
   1.4920000e-02
   7.0700000e-03
  -6.3300000e-03
  -1.2970000e-02
  -1.2150000e-02
  -2.7030000e-02
  -5.9440000e-02
  -5.6070000e-02
   3.8900000e-03
  -1.3820000e-02
   3.0350000e-02
   2.2020000e-02
   5.0700000e-02
   5.1740000e-02
   1.4000000e-03
   4.5540000e-02
   1.1100000e-02
   5.3160000e-02
   1.8920000e-02
   7.4600000e-03
   1.2212000e-01
   5.9220000e-02
   3.9760000e-02
   5.2530000e-02
   4.4340000e-02
   5.1550000e-02
   0.0000000e+00
   2.5800000e-03
  -1.8210000e-02
   2.5000000e-04
  -1.8510000e-02
   4.0800000e-02
   5.0010000e-02
   4.5050000e-02
   6.8820000e-02
   7.4800000e-02
   7.3860000e-02
   5.4800000e-03
   2.9420000e-02
   5.5100000e-03
  -5.8260000e-02
  -2.4180000e-02
  -2.0920000e-02
  -5.5520000e-02
  -2.9170000e-02
  -5.5100000e-03
  -4.1350000e-02
  -5.2070000e-02
   4.3000000e-03
   2.5880000e-02
  -6.5750000e-02
   1.6450000e-02
  -3.6030000e-02
  -2.3630000e-02
  -1.5330000e-02
  -3.3940000e-02
  -1.7140000e-02
  -1.6420000e-02
   3.3500000e-03
  -1.7160000e-02
   1.4780000e-02
   5.9960000e-02
   6.1100000e-03
   1.2090000e-02
   3.9760000e-02
   9.4300000e-03
   1.8480000e-02
   1.5380000e-02
   2.1610000e-02
   8.1400000e-03
   4.1570000e-02
   5.2200000e-02
   6.6900000e-02
   5.2230000e-02
   5.7170000e-02
   2.9910000e-02
   6.4730000e-02
   4.6230000e-02
   2.8190000e-02
   9.7010000e-02
   2.9170000e-02
   7.8500000e-02
   4.5080000e-02
   4.9380000e-02
   3.7750000e-02
   2.0560000e-02
   2.1720000e-02
  -2.0480000e-02
   4.0630000e-02
   8.0750000e-02
   6.3300000e-03
   7.0050000e-02
   5.1220000e-02
   7.0820000e-02
  -2.5200000e-03
  -1.7470000e-02
   2.6900000e-03
  -5.7470000e-02
  -3.9730000e-02
  -4.0830000e-02
  -4.3400000e-02
  -2.1410000e-02
  -1.7000000e-02
  -6.0920000e-02
   8.7200000e-03
   6.5500000e-03
  -7.3800000e-03
  -1.7330000e-02
   1.4390000e-02
   2.1720000e-02
  -4.1680000e-02
  -2.0400000e-02
  -2.6320000e-02
  -6.1910000e-02
  -6.5450000e-02
  -3.2350000e-02
  -6.6100000e-03
  -4.7700000e-03
   3.0270000e-02
   4.0630000e-02
   5.9140000e-02
   9.6980000e-02
   2.7140000e-02
   4.9490000e-02
   7.2160000e-02
   3.3010000e-02
   3.7120000e-02
   4.6120000e-02
   7.8940000e-02
   4.2470000e-02
   6.8410000e-02
   4.4970000e-02
   4.1700000e-02
   1.1300000e-02
  -1.7500000e-03
  -2.6320000e-02
   1.7080000e-02
   2.4100000e-03
   1.3130000e-02
   5.8730000e-02
   9.2230000e-02
   5.8350000e-02
   3.7620000e-02
   5.2180000e-02
   7.1640000e-02
  -1.0450000e-02
   1.6780000e-02
  -5.8400000e-03
   4.8000000e-03
   7.6500000e-03
  -4.2420000e-02
  -2.0370000e-02
   2.9600000e-03
  -2.8870000e-02
   1.0390000e-02
  -4.5190000e-02
   2.6430000e-02
   4.1810000e-02
   5.8700000e-03
   6.7830000e-02
  -1.1800000e-03
  -8.2800000e-03
  -1.7000000e-02
  -3.9070000e-02
  -1.6530000e-02
  -8.5570000e-02
  -2.9200000e-02
  -3.0870000e-02
  -3.4680000e-02
  -2.1060000e-02
  -5.2730000e-02
  -1.9960000e-02
   1.1050000e-02
   4.1400000e-03
   9.3500000e-03
  -4.7000000e-04
   6.9290000e-02
   1.0869000e-01
   3.9070000e-02
   6.9370000e-02
   8.3930000e-02
   1.3200000e-03
  -1.3740000e-02
   1.3710000e-02
  -3.8330000e-02
  -1.7190000e-02
  -4.4700000e-03
   2.7880000e-02
   3.3200000e-02
   6.4210000e-02
   1.0578000e-01
   8.2090000e-02
   1.1392000e-01
   8.0550000e-02
   5.4480000e-02
   1.0254000e-01
   5.1630000e-02
   6.7720000e-02
   3.3340000e-02
  -5.8900000e-03
   2.1500000e-02
  -2.1060000e-02
  -3.3040000e-02
  -9.1380000e-02
  -5.2450000e-02
  -4.3050000e-02
  -2.6380000e-02
  -2.7800000e-02
   1.9300000e-02
   5.5380000e-02
  -1.6730000e-02
   6.4870000e-02
   2.6570000e-02
   2.8710000e-02
  -9.4300000e-03
  -6.0980000e-02
  -1.8900000e-03
  -5.6210000e-02
  -8.9000000e-02
  -7.7980000e-02
  -1.1664000e-01
  -5.4840000e-02
  -5.8980000e-02
  -3.7120000e-02
  -1.0560000e-02
   1.5220000e-02
   1.0444000e-01
   6.9610000e-02
   9.6840000e-02
   1.0268000e-01
   5.6590000e-02
   8.7330000e-02
  -1.0060000e-02
  -2.4950000e-02
  -2.0020000e-02
  -7.1420000e-02
  -4.3600000e-03
  -1.4120000e-02
   3.4000000e-03
   1.1490000e-02
   2.5310000e-02
   8.7930000e-02
   1.9600000e-02
   8.8510000e-02
   9.3990000e-02
   7.6110000e-02
   1.1274000e-01
   8.5000000e-02
   9.6270000e-02
   4.7570000e-02
   4.9220000e-02
   1.0530000e-02
  -1.3160000e-02
  -1.6040000e-02
  -2.8930000e-02
  -4.0720000e-02
  -1.5460000e-02
   4.2500000e-03
  -2.1440000e-02
   4.4310000e-02
   4.6690000e-02
   4.2330000e-02
   1.4420000e-02
   1.8510000e-02
   3.8300000e-02
  -2.1690000e-02
  -8.2300000e-03
  -8.2500000e-03
  -4.7760000e-02
  -3.3340000e-02
  -7.7260000e-02
  -3.0050000e-02
  -2.5580000e-02
  -4.6910000e-02
  -2.4210000e-02
  -1.1650000e-02
   1.1320000e-02
   1.0910000e-02
   2.3550000e-02
   2.7340000e-02
  -4.3300000e-03
   1.7500000e-03
   3.7600000e-03
  -1.4200000e-02
  -4.2990000e-02
  -5.1270000e-02
  -5.8980000e-02
  -8.6900000e-03
   1.4920000e-02
  -7.4900000e-03
  -4.8500000e-03
   2.3390000e-02
   2.1740000e-02
   1.9600000e-02
   3.1260000e-02
   5.9720000e-02
   5.8570000e-02
   7.0880000e-02
   8.9050000e-02
   5.7000000e-02
   3.4300000e-02
   6.2460000e-02
   3.9510000e-02
   1.8590000e-02
   1.5190000e-02
   4.0500000e-02
   3.3780000e-02
   4.9410000e-02
   9.1410000e-02
   5.2180000e-02
   9.0400000e-02
   7.6470000e-02
   3.4520000e-02
   3.1260000e-02
   1.1950000e-02
   3.1590000e-02
   4.3270000e-02
   3.8930000e-02
  -6.3100000e-03
   1.1200000e-03
   2.5990000e-02
  -1.3000000e-02
  -6.4760000e-02
  -7.5810000e-02
  -1.4560000e-02
  -5.2370000e-02
  -3.8220000e-02
  -4.1130000e-02
  -3.6800000e-02
  -1.8010000e-02
   1.2340000e-02
  -2.3580000e-02
   1.4000000e-04
  -2.8800000e-03
  -2.1500000e-02
  -8.1700000e-03
  -1.1410000e-02
   3.1800000e-03
  -3.7120000e-02
   3.3810000e-02
  -2.4980000e-02
  -1.1820000e-02
   4.4420000e-02
   1.1270000e-02
  -9.8700000e-03
   1.4700000e-02
   4.3070000e-02
   3.7370000e-02
   1.3020000e-02
   4.2850000e-02
  -1.0360000e-02
  -1.5460000e-02
   4.7240000e-02
   5.3110000e-02
   5.8400000e-03
   9.0560000e-02
   4.0190000e-02
   8.5300000e-02
   9.9060000e-02
   7.9100000e-02
   4.6280000e-02
   3.1720000e-02
   5.0480000e-02
   1.7300000e-02
   2.0480000e-02
   3.2960000e-02
   3.1800000e-03
   4.1180000e-02
   6.0480000e-02
   4.7320000e-02
   1.2280000e-02
   5.7900000e-03
   5.6430000e-02
   1.8840000e-02
   1.2530000e-02
   3.8190000e-02
   1.2750000e-02
   2.7450000e-02
  -1.0090000e-02
   2.7120000e-02
   2.7060000e-02
  -5.7080000e-02
  -2.3420000e-02
   1.8480000e-02
  -7.4600000e-03
  -2.6900000e-02
  -1.6640000e-02
  -9.4900000e-03
  -1.8040000e-02
  -1.6590000e-02
  -3.8300000e-02
   0.0000000e+00
  -3.8410000e-02
  -3.3010000e-02
   1.0530000e-02
   5.3600000e-02
  -4.7080000e-02
   3.2760000e-02
   9.6290000e-02
   2.0650000e-02
   9.1000000e-03
   1.6530000e-02
  -5.3630000e-02
  -2.8950000e-02
  -1.7660000e-02
  -2.1390000e-02
  -5.6020000e-02
   1.4800000e-03
   1.6310000e-02
   3.0820000e-02
   4.3950000e-02
   8.6120000e-02
   5.9960000e-02
   6.5560000e-02
   9.2510000e-02
   1.0298000e-01
   6.8570000e-02
   5.3820000e-02
   4.4010000e-02
   6.1440000e-02
   1.4560000e-02
  -1.7520000e-02
  -3.0200000e-03
   4.9100000e-03
  -1.8100000e-03
  -2.2800000e-03
   2.0950000e-02
   4.5790000e-02
   4.2200000e-02
   1.4920000e-02
  -1.4000000e-04
   5.3770000e-02
   3.0320000e-02
  -2.0810000e-02
   1.4610000e-02
  -5.4600000e-03
   2.6160000e-02
   1.8120000e-02
   1.6780000e-02
  -4.3730000e-02
  -3.9540000e-02
  -1.2910000e-02
  -4.9160000e-02
  -5.5740000e-02
  -1.5440000e-02
  -8.4830000e-02
  -4.4090000e-02
   1.8320000e-02
  -3.2100000e-03
  -3.0000000e-02
  -1.6420000e-02
   4.8940000e-02
   2.0020000e-02
  -2.6430000e-02
  -7.4000000e-04
  -5.4300000e-03
   3.9590000e-02
   2.1800000e-02
   1.1100000e-02
   2.3330000e-02
   2.4730000e-02
   3.1720000e-02
   5.4430000e-02
   2.8190000e-02
   7.5870000e-02
   3.2570000e-02
   6.4210000e-02
   8.8510000e-02
   3.6550000e-02
   7.2110000e-02
   2.9420000e-02
   6.7530000e-02
   3.7730000e-02
   1.6310000e-02
   1.3710000e-02
   1.4230000e-02
   6.7940000e-02
  -1.6000000e-04
   1.8640000e-02
   8.0750000e-02
   4.1070000e-02
   7.4080000e-02
   5.4920000e-02
   7.6690000e-02
   4.5510000e-02
   3.1970000e-02
   2.1400000e-03
   8.2000000e-04
  -4.8010000e-02
  -3.6930000e-02
  -8.2140000e-02
  -6.1750000e-02
  -8.5270000e-02
  -9.3690000e-02
   2.5000000e-03
  -1.7900000e-02
  -4.2800000e-03
   3.0130000e-02
   1.9770000e-02
   6.4190000e-02
   1.4280000e-02
  -3.4500000e-03
   1.6780000e-02
   2.6870000e-02
  -5.8000000e-04
  -4.8090000e-02
  -1.3870000e-02
  -6.1400000e-03
  -6.7260000e-02
  -4.5650000e-02
  -8.8600000e-03
  -6.4080000e-02
  -4.0990000e-02
   1.3050000e-02
   4.3490000e-02
   4.7270000e-02
   6.1090000e-02
   1.2363000e-01
   1.1466000e-01
   7.4000000e-02
   1.1450000e-01
   4.8800000e-02
   1.4180000e-02
   2.5310000e-02
   1.3200000e-03
   1.0990000e-02
  -3.1200000e-02
   6.4620000e-02
   3.9980000e-02
   4.9540000e-02
   9.7420000e-02
   1.5600000e-02
   1.0509000e-01
   7.5450000e-02
   7.5100000e-03
   4.2580000e-02
   1.2010000e-02
   3.4440000e-02
  -2.8270000e-02
   3.8910000e-02
   2.2700000e-02
   3.7800000e-03
   3.3860000e-02
   1.6000000e-04
  -5.8100000e-03
  -2.1800000e-02
   1.1460000e-02
   1.0940000e-02
   1.3200000e-03
  -1.2910000e-02
  -1.1650000e-02
  -2.1500000e-02
  -1.3600000e-02
  -6.5450000e-02
  -3.5950000e-02
   1.5550000e-02
  -1.5710000e-02
  -3.6000000e-02
  -1.5350000e-02
  -1.8120000e-02
  -2.8240000e-02
  -3.2490000e-02
  -3.1700000e-02
  -3.8990000e-02
  -1.3430000e-02
   1.0610000e-02
   1.7000000e-03
   3.6270000e-02
   6.9810000e-02
   3.2350000e-02
   5.1030000e-02
   5.1770000e-02
   3.5450000e-02
   1.3740000e-02
   3.5400000e-03
   9.0500000e-03
   2.5800000e-02
   2.7100000e-03
  -8.2000000e-04
   3.9730000e-02
   7.2960000e-02
   6.0510000e-02
   3.6770000e-02
   1.0030000e-01
   9.3770000e-02
   4.6450000e-02
   8.9360000e-02
   9.4730000e-02
   8.8860000e-02
   3.0000000e-05
   1.8840000e-02
   3.4030000e-02
  -4.9100000e-03
  -6.1470000e-02
  -2.6680000e-02
  -3.5230000e-02
  -4.9460000e-02
  -3.3780000e-02
   3.5150000e-02
   3.4600000e-02
  -1.3300000e-02
   4.1950000e-02
   3.2410000e-02
   2.5960000e-02
   1.1710000e-02
  -9.6000000e-04
   3.3200000e-03
   1.0720000e-02
  -3.4740000e-02
  -4.0740000e-02
  -4.8060000e-02
  -2.4680000e-02
  -5.1680000e-02
  -3.7540000e-02
  -4.1590000e-02
  -3.0850000e-02
  -1.6200000e-02
  -2.6160000e-02
  -2.6810000e-02
   9.9000000e-04
   1.8600000e-03
   4.4280000e-02
   5.9500000e-03
   3.5450000e-02
   3.4050000e-02
   4.1980000e-02
   5.1220000e-02
   3.2460000e-02
   4.4500000e-02
   1.2170000e-02
  -1.9190000e-02
  -2.0340000e-02
  -2.9060000e-02
  -3.8700000e-03
   8.2500000e-03
   1.7770000e-02
   3.7840000e-02
   8.6150000e-02
   1.0128000e-01
   8.1950000e-02
   1.0252000e-01
   9.0620000e-02
   7.4140000e-02
   3.0320000e-02
   1.6590000e-02
  -1.2900000e-03
  -3.1340000e-02
   3.8700000e-03
   3.4800000e-03
  -1.1050000e-02
  -1.8950000e-02
   3.2000000e-02
   7.0050000e-02
  -2.2130000e-02
   4.6990000e-02
   6.3580000e-02
   1.4230000e-02
   4.0600000e-03
   3.2900000e-02
  -1.3870000e-02
  -2.7560000e-02
  -2.2130000e-02
  -5.9630000e-02
  -5.7470000e-02
  -4.1460000e-02
  -4.3650000e-02
  -1.0847000e-01
  -2.4540000e-02
  -2.9580000e-02
  -1.9190000e-02
   1.4260000e-02
  -1.3740000e-02
   4.2170000e-02
   2.8650000e-02
   7.4360000e-02
   5.6760000e-02
   6.6600000e-03
   5.8460000e-02
  -8.5000000e-04
  -1.0040000e-02
   5.1000000e-03
  -4.1020000e-02
   4.3000000e-03
  -3.1810000e-02
  -3.6000000e-04
   3.1260000e-02
  -4.3600000e-03
   5.9170000e-02
   7.8990000e-02
   6.1500000e-02
   8.0200000e-02
   7.9870000e-02
   1.0065000e-01
   6.3610000e-02
   6.6320000e-02
   6.8020000e-02
  -2.0800000e-03
   2.2350000e-02
  -1.4000000e-03
  -6.8000000e-03
  -1.8120000e-02
  -3.2980000e-02
  -1.0170000e-02
   1.5440000e-02
   2.3800000e-02
   4.8560000e-02
   3.5120000e-02
   8.2250000e-02
   1.0586000e-01
   6.1530000e-02
   4.8750000e-02
   3.5670000e-02
  -7.5900000e-03
  -7.5240000e-02
  -1.0578000e-01
  -8.7110000e-02
  -7.6770000e-02
  -8.8830000e-02
  -7.3730000e-02
  -2.8240000e-02
   1.1300000e-02
  -1.0420000e-02
   2.6320000e-02
   5.8350000e-02
   9.1600000e-03
  -4.5210000e-02
  -9.8200000e-03
   7.6800000e-03
  -3.0870000e-02
  -5.3190000e-02
   1.2530000e-02
  -5.5700000e-03
  -1.8950000e-02
  -2.1960000e-02
  -1.7790000e-02
   1.4970000e-02
  -1.3380000e-02
   3.9500000e-03
   2.9530000e-02
   4.9630000e-02
   4.7490000e-02
   8.3600000e-03
   8.3100000e-02
   7.6800000e-02
   6.7230000e-02
   6.0920000e-02
   5.9630000e-02
   1.0422000e-01
   5.3990000e-02
   1.4810000e-02
   3.6740000e-02
   2.5580000e-02
   1.3430000e-02
  -9.6200000e-03
  -1.8230000e-02
   1.7740000e-02
   2.7420000e-02
   2.6710000e-02
   4.3180000e-02
   1.0611000e-01
   9.0340000e-02
   1.4560000e-02
   4.1980000e-02
   3.0490000e-02
   1.7790000e-02
  -4.3870000e-02
  -4.3050000e-02
  -9.1300000e-03
  -3.8740000e-02
  -2.3280000e-02
  -2.1550000e-02
   2.3140000e-02
   2.3000000e-03
  -4.2200000e-03
  -2.5000000e-04
   1.8320000e-02
  -6.1100000e-03
  -4.6450000e-02
  -4.6600000e-03
   1.3980000e-02
  -1.1490000e-02
  -6.7610000e-02
  -1.0230000e-02
  -5.8590000e-02
  -5.0700000e-03
  -6.7910000e-02
  -3.4960000e-02
  -8.5300000e-03
   3.0700000e-03
   3.0400000e-03
  -4.0610000e-02
   6.6080000e-02
   2.9500000e-02
  -4.6100000e-03
   4.8150000e-02
   9.1960000e-02
   7.9760000e-02
   2.1440000e-02
   5.3220000e-02
   5.0120000e-02
  -1.4500000e-02
   3.2190000e-02
   4.8060000e-02
   6.9400000e-03
   3.4300000e-03
   5.3410000e-02
   2.8350000e-02
   5.7820000e-02
   9.9450000e-02
   8.9880000e-02
   7.2050000e-02
   1.1455000e-01
   1.0778000e-01
   5.1130000e-02
   2.1700000e-03
   5.3030000e-02
  -1.1900000e-02
  -8.0600000e-03
  -2.0430000e-02
  -4.3590000e-02
  -2.8210000e-02
  -5.1460000e-02
  -1.9630000e-02
  -7.7000000e-04
   1.9140000e-02
   2.2020000e-02
   5.3200000e-03
   7.7620000e-02
   7.2300000e-02
   2.5280000e-02
   1.9550000e-02
   6.6350000e-02
  -1.7520000e-02
  -4.4340000e-02
  -4.4140000e-02
  -5.6340000e-02
  -7.0440000e-02
  -7.4000000e-02
  -1.2690000e-02
  -8.6100000e-03
  -2.8000000e-03
   3.3400000e-02
  -7.4000000e-03
   1.9250000e-02
   6.9900000e-03
  -1.6640000e-02
   3.5620000e-02
  -3.8600000e-02
  -1.8230000e-02
   2.5500000e-03
   1.2560000e-02
   2.7000000e-04
  -8.4400000e-03
   6.2760000e-02
   4.3290000e-02
   5.8480000e-02
   7.6960000e-02
   5.8810000e-02
   4.6860000e-02
   7.5070000e-02
   2.0810000e-02
   3.5900000e-03
   7.5900000e-03
   1.1570000e-02
   3.8630000e-02
   2.1110000e-02
   6.6000000e-02
   7.0960000e-02
   2.2810000e-02
   5.9800000e-02
   3.2190000e-02
   5.6810000e-02
   3.2820000e-02
   3.2050000e-02
   6.7890000e-02
  -3.2110000e-02
   3.4850000e-02
   3.4300000e-03
   3.0410000e-02
   1.6510000e-02
  -1.1100000e-02
   2.5440000e-02
   8.1400000e-03
  -4.0300000e-03
  -6.0810000e-02
  -6.4730000e-02
  -2.1990000e-02
  -2.1800000e-02
  -5.4640000e-02
  -6.2540000e-02
  -7.5700000e-03
   8.3100000e-03
  -1.2860000e-02
  -2.2510000e-02
   4.9110000e-02
   1.6620000e-02
   2.6020000e-02
   1.0280000e-02
   3.2930000e-02
   5.7900000e-03
  -8.9700000e-03
  -3.0820000e-02
  -1.6640000e-02
  -2.9090000e-02
  -3.6520000e-02
  -4.4970000e-02
  -2.2430000e-02
  -8.2300000e-03
  -2.2810000e-02
   4.7130000e-02
   5.8180000e-02
   3.2270000e-02
   7.0600000e-02
   7.5260000e-02
   1.3089000e-01
   8.5790000e-02
   7.4960000e-02
   7.0790000e-02
   6.4300000e-02
   6.7420000e-02
   3.9400000e-02
  -4.4000000e-04
  -1.1500000e-03
   2.2000000e-04
   1.7790000e-02
   8.3900000e-03
   6.3000000e-04
   3.8770000e-02
   8.7050000e-02
   4.3540000e-02
   6.0070000e-02
   9.3060000e-02
   7.5810000e-02
   4.1180000e-02
   5.5960000e-02
   3.7150000e-02
  -6.0600000e-03
  -4.8340000e-02
  -2.8270000e-02
  -4.0690000e-02
  -8.8670000e-02
  -1.0323000e-01
  -5.8570000e-02
  -3.3670000e-02
  -7.1560000e-02
  -3.5780000e-02
   3.8930000e-02
   1.6340000e-02
  -3.5480000e-02
   4.1430000e-02
   5.2420000e-02
   1.2780000e-02
  -3.5780000e-02
   7.2700000e-03
   7.5100000e-03
  -2.2620000e-02
  -1.8120000e-02
  -5.8100000e-02
  -1.8600000e-03
  -1.7770000e-02
  -4.1540000e-02
   1.6120000e-02
   4.7700000e-03
   4.8670000e-02
   4.3570000e-02
   1.2958000e-01
   4.6090000e-02
   7.7320000e-02
   7.7810000e-02
   3.4460000e-02
   7.5070000e-02
   1.8890000e-02
   1.5570000e-02
  -4.5800000e-03
  -2.2100000e-02
   3.1780000e-02
  -3.4800000e-03
   5.8400000e-03
   1.8950000e-02
   6.5970000e-02
   5.9550000e-02
   3.5900000e-03
   8.6200000e-02
   8.3300000e-02
   4.0960000e-02
   8.2470000e-02
   6.8440000e-02
   7.1340000e-02
   6.4760000e-02
   8.1400000e-03
   3.0400000e-03
  -2.8050000e-02
  -1.1300000e-02
  -8.0750000e-02
  -4.8390000e-02
  -1.8320000e-02
  -5.3220000e-02
  -2.8080000e-02
   1.5570000e-02
   1.9990000e-02
  -1.3900000e-02
   2.2620000e-02
   3.2630000e-02
  -3.5730000e-02
  -2.7010000e-02
  -4.5020000e-02
  -3.5750000e-02
  -2.3880000e-02
  -4.0800000e-02
  -6.8960000e-02
  -4.5820000e-02
  -4.6450000e-02
  -1.6620000e-02
  -1.9080000e-02
  -3.7040000e-02
   6.7500000e-02
   1.0580000e-02
   6.8790000e-02
   3.9290000e-02
   5.3220000e-02
   9.1110000e-02
  -1.4500000e-03
   3.2330000e-02
   2.1300000e-02
   1.7710000e-02
  -2.0120000e-02
   2.1220000e-02
   6.4790000e-02
   3.8770000e-02
   3.4790000e-02
   7.3860000e-02
   4.9870000e-02
   5.6700000e-02
   8.1820000e-02
   2.6050000e-02
   6.3660000e-02
   5.2920000e-02
   3.4960000e-02
   3.5640000e-02
   3.0520000e-02
   1.0310000e-02
   6.5500000e-03
   6.3100000e-03
   1.2100000e-03
  -9.4000000e-03
   4.0300000e-03
   2.1910000e-02
  -2.3250000e-02
   2.7770000e-02
   1.4150000e-02
   1.4480000e-02
   1.1800000e-03
   3.7180000e-02
   4.9100000e-03
   6.8500000e-03
  -2.2320000e-02
  -3.7780000e-02
  -2.3200000e-02
  -4.9130000e-02
  -2.3690000e-02
  -4.2220000e-02
  -4.1590000e-02
  -4.5240000e-02
  -4.4910000e-02
  -2.6980000e-02
  -1.7880000e-02
   4.7490000e-02
   4.0550000e-02
  -1.6000000e-04
   3.4270000e-02
   6.2020000e-02
   7.0500000e-03
  -1.4860000e-02
   1.5410000e-02
   1.1100000e-02
  -1.1820000e-02
   4.5000000e-03
   1.1020000e-02
  -4.9300000e-02
   3.4850000e-02
   2.4950000e-02
   3.1420000e-02
   6.0270000e-02
   8.4890000e-02
   6.4650000e-02
   1.0002000e-01
   1.3312000e-01
   8.9330000e-02
   1.1910000e-01
   9.7970000e-02
   2.2350000e-02
   1.5110000e-02
   3.1640000e-02
  -3.7120000e-02
  -2.4620000e-02
  -4.9380000e-02
  -3.9890000e-02
  -2.4100000e-02
   2.8800000e-03
   7.0900000e-02
   2.8200000e-03
   5.7720000e-02
   8.0170000e-02
   6.6520000e-02
   1.0773000e-01
   7.0500000e-03
   3.4030000e-02
   9.2900000e-03
  -2.0320000e-02
  -9.0150000e-02
  -1.0200000e-01
  -5.7880000e-02
  -1.1071000e-01
  -1.4101000e-01
  -4.6890000e-02
  -3.6270000e-02
   4.4000000e-04
   6.9600000e-03
   4.2360000e-02
   5.3030000e-02
   5.2230000e-02
   4.5820000e-02
   3.9040000e-02
   6.8800000e-03
   5.5000000e-04
  -1.2310000e-02
   5.5400000e-03
  -1.9110000e-02
  -3.0710000e-02
  -1.7030000e-02
  -6.3300000e-03
   1.4340000e-02
  -2.3140000e-02
   1.8590000e-02
   2.0290000e-02
   4.1620000e-02
   1.0200000e-02
   4.2800000e-03
   1.0024000e-01
   9.9340000e-02
   5.5990000e-02
   4.6890000e-02
   7.1950000e-02
   6.2350000e-02
   2.8130000e-02
   3.4710000e-02
   3.4570000e-02
   4.5980000e-02
   2.9830000e-02
   1.7960000e-02
   5.1930000e-02
   3.6470000e-02
   5.7000000e-03
   5.3160000e-02
   6.1940000e-02
   1.0640000e-02
   4.7210000e-02
   4.8310000e-02
   5.8670000e-02
  -8.0000000e-05
  -2.3300000e-03
   1.2970000e-02
   5.6800000e-03
  -2.8410000e-02
  -6.8330000e-02
  -3.4550000e-02
  -7.0190000e-02
  -5.1130000e-02
  -2.4070000e-02
  -4.5160000e-02
  -5.4600000e-03
   1.4260000e-02
   9.7100000e-03
   5.9200000e-03
   2.3600000e-03
   8.5500000e-03
  -2.2370000e-02
  -3.7890000e-02
  -5.9520000e-02
  -3.0930000e-02
   1.6260000e-02
  -7.0160000e-02
   1.9990000e-02
   1.6260000e-02
   1.5820000e-02
   6.0000000e-04
   3.4740000e-02
   3.2710000e-02
  -2.5310000e-02
   4.0140000e-02
   5.5360000e-02
   4.8860000e-02
   3.2350000e-02
   3.9400000e-02
   7.6910000e-02
   6.6740000e-02
   5.0480000e-02
   2.9200000e-02
   9.3910000e-02
   5.8130000e-02
   3.9650000e-02
  -4.0600000e-03
   3.5860000e-02
   9.2400000e-03
  -2.9280000e-02
   3.4250000e-02
   2.4270000e-02
   3.7120000e-02
   7.8700000e-03
   7.1840000e-02
   1.0139000e-01
   3.9020000e-02
   4.8150000e-02
   6.2980000e-02
   2.6760000e-02
  -4.6100000e-03
  -3.6580000e-02
  -2.7830000e-02
  -3.0960000e-02
  -6.5610000e-02
  -6.4020000e-02
  -1.7550000e-02
   2.4840000e-02
  -6.5310000e-02
   1.0670000e-02
  -2.6900000e-03
   9.4600000e-03
   1.8290000e-02
   1.6010000e-02
   2.1700000e-03
  -2.7610000e-02
   2.7390000e-02
  -1.8120000e-02
   1.3570000e-02
  -3.3720000e-02
  -5.3770000e-02
  -1.8420000e-02
  -1.5850000e-02
   2.4430000e-02
  -4.6860000e-02
  -4.4640000e-02
  -1.6310000e-02
   1.2910000e-02
   3.8280000e-02
  -5.8780000e-02
   7.5700000e-03
   6.3340000e-02
   6.6630000e-02
   6.2270000e-02
   4.7020000e-02
   1.0290000e-01
   8.9490000e-02
   3.8710000e-02
   6.2920000e-02
   6.4100000e-02
   1.5710000e-02
   1.4420000e-02
   2.7660000e-02
   4.6640000e-02
  -1.1650000e-02
   2.3330000e-02
   2.8020000e-02
   2.0620000e-02
   7.8940000e-02
   1.6120000e-02
   5.6400000e-02
   7.6390000e-02
   6.0870000e-02
   2.0970000e-02
   3.7700000e-02
   3.1830000e-02
  -5.7690000e-02
  -4.5100000e-02
  -2.4700000e-03
  -1.7160000e-02
  -1.3850000e-02
  -6.1660000e-02
  -5.6290000e-02
   1.3870000e-02
  -1.3270000e-02
  -1.2370000e-02
  -3.8410000e-02
  -2.9360000e-02
  -1.5880000e-02
   5.8000000e-04
  -8.9700000e-03
  -2.4210000e-02
  -1.3870000e-02
  -1.6590000e-02
  -1.8510000e-02
   4.8800000e-03
  -1.6970000e-02
  -4.1240000e-02
  -1.7030000e-02
   3.0540000e-02
   7.4900000e-03
   1.0060000e-02
   2.5640000e-02
   3.2570000e-02
   6.2540000e-02
  -3.8100000e-03
   2.6430000e-02
   3.6630000e-02
   2.1170000e-02
   3.4030000e-02
   5.1460000e-02
   9.5470000e-02
   2.5770000e-02
   2.6710000e-02
   2.7470000e-02
   3.7860000e-02
   3.4460000e-02
  -1.8890000e-02
   1.1790000e-02
   5.7740000e-02
   6.0350000e-02
   5.6670000e-02
   5.7360000e-02
   9.4480000e-02
   6.1910000e-02
   3.7290000e-02
   5.2860000e-02
   4.9130000e-02
  -4.6090000e-02
  -6.3300000e-03
   3.2020000e-02
   2.3110000e-02
   1.0990000e-02
   1.6120000e-02
   3.9130000e-02
   8.3400000e-03
   2.0870000e-02
   2.3140000e-02
   3.5590000e-02
   8.6100000e-03
   3.1390000e-02
  -1.7380000e-02
  -1.0940000e-02
  -2.5310000e-02
  -4.6530000e-02
  -7.2270000e-02
  -6.3090000e-02
  -1.3000000e-02
  -4.7630000e-02
  -2.2020000e-02
  -3.2760000e-02
  -2.2590000e-02
  -2.4400000e-03
  -1.5820000e-02
  -2.4400000e-02
  -3.7540000e-02
   3.1910000e-02
  -3.7730000e-02
   3.3500000e-02
   2.3250000e-02
   3.5310000e-02
   4.2140000e-02
   6.1990000e-02
   5.8730000e-02
   1.0690000e-02
   7.1600000e-03
   1.1680000e-02
  -2.4240000e-02
   1.5330000e-02
  -5.1000000e-03
   9.2100000e-03
   4.6690000e-02
   1.1842000e-01
   9.8400000e-02
   8.8590000e-02
   1.2434000e-01
   5.5550000e-02
   8.2990000e-02
   1.0128000e-01
   7.8090000e-02
   3.5970000e-02
  -2.8570000e-02
   1.5080000e-02
  -1.8750000e-02
  -1.3900000e-02
  -1.5880000e-02
  -7.0600000e-02
   2.5690000e-02
   2.5200000e-03
  -2.3030000e-02
   5.3440000e-02
   8.5800000e-03
   4.7820000e-02
  -2.6920000e-02
   1.0090000e-02
   2.3580000e-02
  -4.0940000e-02
  -8.7200000e-03
  -3.2300000e-02
   7.4000000e-04
   9.2700000e-03
  -3.6600000e-02
  -1.2670000e-02
  -4.8120000e-02
  -4.0360000e-02
  -2.9910000e-02
  -4.6310000e-02
   1.6590000e-02
   2.0340000e-02
   8.2500000e-03
   4.1760000e-02
   7.9380000e-02
   5.0230000e-02
  -3.3700000e-03
  -7.2400000e-03
   2.8900000e-02
  -6.7610000e-02
  -7.1420000e-02
  -3.9240000e-02
  -5.2120000e-02
  -1.3190000e-02
   2.1190000e-02
   5.2970000e-02
   4.6390000e-02
   9.4540000e-02
   1.2382000e-01
   8.8420000e-02
   8.2860000e-02
   8.2230000e-02
   4.2280000e-02
  -3.1800000e-03
   1.8890000e-02
  -1.8890000e-02
  -3.5340000e-02
  -1.4590000e-02
   7.2400000e-03
  -6.1700000e-03
   1.1000000e-03
   5.1880000e-02
   5.9520000e-02
   8.9080000e-02
   7.5760000e-02
   5.3680000e-02
   5.5360000e-02
   5.0180000e-02
   3.5510000e-02
  -2.5000000e-03
  -3.8000000e-04
   1.0860000e-02
  -6.3860000e-02
  -5.2900000e-03
  -2.3060000e-02
  -6.7340000e-02
  -6.7500000e-02
   4.1400000e-03
  -7.2490000e-02
  -4.4420000e-02
   8.4400000e-03
   1.5240000e-02
   1.5900000e-03
   2.8540000e-02
   6.6980000e-02
  -1.3430000e-02
   1.3490000e-02
   2.0450000e-02
  -2.6300000e-03
  -2.7500000e-02
  -3.1040000e-02
   1.4590000e-02
  -2.1610000e-02
  -1.8480000e-02
  -1.5380000e-02
  -1.8340000e-02
   9.7900000e-03
   7.9200000e-03
   1.0690000e-02
   3.7400000e-02
   2.5660000e-02
   7.5040000e-02
   1.1716000e-01
   7.0160000e-02
   4.9160000e-02
   8.2720000e-02
   7.3320000e-02
   4.0190000e-02
  -2.3000000e-03
   2.9260000e-02
   1.4370000e-02
  -6.3600000e-03
   6.1640000e-02
   5.4300000e-03
   6.5750000e-02
   5.7820000e-02
   8.9110000e-02
   5.3140000e-02
   4.8450000e-02
   9.0040000e-02
   1.6510000e-02
   6.4350000e-02
   5.0920000e-02
  -2.1390000e-02
  -1.2280000e-02
  -2.1100000e-03
  -3.8060000e-02
  -6.7970000e-02
  -4.0880000e-02
   6.3000000e-04
  -3.0110000e-02
  -2.5910000e-02
   1.7080000e-02
   1.7110000e-02
   2.1960000e-02
  -1.5300000e-02
  -1.8900000e-03
  -7.6800000e-03
  -2.4510000e-02
  -6.8490000e-02
  -6.8220000e-02
  -4.7540000e-02
  -5.1980000e-02
  -4.2500000e-03
   3.0520000e-02
  -2.9780000e-02
  -3.3340000e-02
   6.4950000e-02
   2.7770000e-02
   2.8730000e-02
   5.0700000e-02
   3.9240000e-02
   2.5750000e-02
   7.6770000e-02
   5.8570000e-02
  -8.2000000e-04
   6.7200000e-03
   3.5670000e-02
  -1.0940000e-02
   1.5570000e-02
  -1.2010000e-02
   9.7900000e-03
   7.0990000e-02
   7.4080000e-02
   5.0890000e-02
   5.1000000e-02
   7.8940000e-02
   6.3610000e-02
   3.9130000e-02
   5.8650000e-02
   5.8900000e-03
   1.0390000e-02
   3.7730000e-02
   4.2500000e-03
  -2.7750000e-02
   1.4260000e-02
   2.0400000e-02
   2.5500000e-03
   1.5680000e-02
  -1.6530000e-02
   1.3080000e-02
   3.5290000e-02
   2.0510000e-02
  -1.4530000e-02
  -5.7600000e-03
   3.1200000e-02
  -1.2600000e-03
  -2.8950000e-02
  -1.7740000e-02
  -1.6400000e-02
  -3.0400000e-03
   2.8190000e-02
   2.0450000e-02
  -2.7120000e-02
   1.6180000e-02
   3.4850000e-02
  -2.9150000e-02
   1.7080000e-02
  -4.9600000e-03
  -3.7950000e-02
  -1.9490000e-02
  -4.0900000e-03
  -2.4070000e-02
  -4.3100000e-02
  -4.1100000e-03
   3.5100000e-02
  -4.7520000e-02
   6.9100000e-03
   1.6940000e-02
  -9.7100000e-03
   1.8810000e-02
   2.1470000e-02
   4.5680000e-02
   3.9350000e-02
   6.6790000e-02
   3.7260000e-02
   6.3010000e-02
   7.6200000e-02
   6.3250000e-02
   5.7140000e-02
   6.8930000e-02
   5.3050000e-02
   5.3490000e-02
   4.8260000e-02
   3.5100000e-02
   2.4510000e-02
  -3.0400000e-03
  -4.4100000e-03
   2.8490000e-02
   1.9300000e-02
   3.6580000e-02
  -1.0400000e-03
   7.2100000e-03
   6.8820000e-02
   5.9470000e-02
   3.7920000e-02
   1.5570000e-02
   6.7780000e-02
   5.1190000e-02
  -3.1800000e-03
   1.2900000e-03
  -4.4200000e-02
  -2.7690000e-02
  -4.5400000e-02
  -9.8650000e-02
  -1.1025000e-01
  -1.1159000e-01
  -6.8440000e-02
  -3.7920000e-02
  -1.8640000e-02
   2.7770000e-02
   2.1690000e-02
   4.4120000e-02
   1.0106000e-01
   1.1612000e-01
   3.6770000e-02
  -9.6500000e-03
   4.9900000e-02
   1.0560000e-02
  -3.8360000e-02
  -3.5420000e-02
  -2.6380000e-02
  -3.0790000e-02
  -4.6310000e-02
  -2.2920000e-02
   2.5000000e-04
   6.7200000e-03
   1.8780000e-02
   4.1890000e-02
   5.8370000e-02
   6.4510000e-02
   8.0090000e-02
   1.1132000e-01
   8.0360000e-02
   7.4690000e-02
   6.6110000e-02
   6.9200000e-02
   2.7340000e-02
   1.0700000e-03
   2.3850000e-02
   8.7200000e-03
  -1.7630000e-02
  -1.4000000e-03
   1.7050000e-02
  -2.3060000e-02
   9.9300000e-03
   2.1190000e-02
  -1.8810000e-02
   1.5240000e-02
   1.1320000e-02
   5.7910000e-02
   4.4610000e-02
   4.7820000e-02
   8.4560000e-02
   6.3940000e-02
   4.1320000e-02
   1.6180000e-02
   3.6380000e-02
   2.1820000e-02
  -3.5290000e-02
  -1.2800000e-02
  -4.5500000e-03
  -6.4300000e-02
  -2.2780000e-02
  -4.3460000e-02
   1.2970000e-02
  -1.2890000e-02
  -4.3980000e-02
  -1.6180000e-02
  -3.8520000e-02
   6.6000000e-04
   6.7200000e-03
  -2.7970000e-02
   4.6720000e-02
   4.7630000e-02
   8.5800000e-03
   2.1770000e-02
  -6.8300000e-03
  -2.4680000e-02
  -3.8220000e-02
  -1.2120000e-02
  -4.4340000e-02
  -3.3230000e-02
  -2.1280000e-02
  -3.2300000e-02
  -1.3680000e-02
   3.9810000e-02
   1.5790000e-02
   6.9500000e-02
   7.7480000e-02
   7.8220000e-02
   8.7980000e-02
   1.0550000e-01
   8.4690000e-02
   7.1750000e-02
   8.2280000e-02
   9.2120000e-02
   8.4700000e-03
   2.9940000e-02
   2.0180000e-02
   1.0720000e-02
  -1.1000000e-04
   4.3070000e-02
   4.5290000e-02
   3.2380000e-02
   5.3160000e-02
   7.1260000e-02
   4.3100000e-02
   6.2350000e-02
   2.9170000e-02
  -3.1300000e-03
   2.2570000e-02
  -1.6510000e-02
  -3.3700000e-02
  -3.1590000e-02
  -2.2290000e-02
  -7.6630000e-02
  -6.8850000e-02
  -1.8670000e-02
  -6.5970000e-02
  -8.7410000e-02
  -1.1270000e-02
  -1.8480000e-02
  -3.0710000e-02
  -8.5800000e-03
   2.2130000e-02
  -2.0290000e-02
  -1.3020000e-02
  -2.6130000e-02
  -6.8500000e-03
   1.0340000e-02
  -4.2110000e-02
   1.7490000e-02
   1.1000000e-03
   5.5900000e-03
   3.2960000e-02
   3.4880000e-02
   4.6090000e-02
   5.8070000e-02
   7.6800000e-02
   5.6590000e-02
   3.9780000e-02
   8.7300000e-02
   1.1430000e-02
   4.1590000e-02
   6.3420000e-02
   2.9640000e-02
  -7.4000000e-04
   3.9020000e-02
  -8.6400000e-03
   1.1600000e-02
   3.4490000e-02
   5.0810000e-02
   7.6410000e-02
   7.3480000e-02
   1.3273000e-01
   3.1280000e-02
   8.2340000e-02
   1.0241000e-01
  -5.2310000e-02
  -6.6900000e-03
  -2.1700000e-03
   7.4600000e-03
  -2.5090000e-02
  -1.6640000e-02
   4.0410000e-02
  -2.8540000e-02
   2.2650000e-02
   2.0230000e-02
  -1.3740000e-02
   2.4370000e-02
  -2.4700000e-02
   1.4500000e-02
   2.5640000e-02
   2.8050000e-02
   3.4300000e-02
  -8.5000000e-03
   5.7610000e-02
   1.4940000e-02
  -2.4130000e-02
  -1.2340000e-02
  -3.1780000e-02
  -3.1500000e-02
  -1.1472000e-01
  -8.4690000e-02
  -4.7570000e-02
  -8.6720000e-02
  -6.4380000e-02
  -5.5330000e-02
  -1.5110000e-02
  -8.6400000e-03
  -5.8900000e-03
   5.5360000e-02
   7.5700000e-02
   7.3230000e-02
   6.3860000e-02
   5.2290000e-02
   4.7210000e-02
   1.4070000e-02
  -1.9470000e-02
  -1.7140000e-02
   5.7000000e-03
  -3.9200000e-03
   1.0640000e-02
   5.3050000e-02
   7.0190000e-02
   8.1290000e-02
   8.4390000e-02
   9.4840000e-02
   4.9020000e-02
   9.5850000e-02
   9.2920000e-02
   6.3530000e-02
   1.0279000e-01
   5.3050000e-02
   7.1260000e-02
   1.6370000e-02
   9.3200000e-03
   2.5530000e-02
  -1.0780000e-02
  -6.0350000e-02
   9.9000000e-03
  -1.5680000e-02
  -4.9740000e-02
  -2.3090000e-02
   4.6250000e-02
   4.9100000e-03
  -1.2420000e-02
  -3.0700000e-03
  -1.1800000e-03
  -1.2560000e-02
  -2.4920000e-02
  -6.1640000e-02
  -2.8380000e-02
  -3.2350000e-02
  -4.3900000e-02
  -6.2620000e-02
  -4.6860000e-02
  -2.1960000e-02
  -6.9120000e-02
  -2.7640000e-02
  -2.6980000e-02
  -3.0520000e-02
   8.1400000e-03
   2.4590000e-02
   4.1570000e-02
   6.5690000e-02
   3.0630000e-02
   3.5150000e-02
   2.2620000e-02
   7.5510000e-02
   1.8400000e-02
   1.6340000e-02
   3.8630000e-02
   1.6480000e-02
   3.6630000e-02
   1.3460000e-02
   3.1260000e-02
   6.4100000e-02
  -1.7520000e-02
   6.4080000e-02
   7.8990000e-02
   9.5500000e-02
   8.6780000e-02
   7.7840000e-02
   9.6590000e-02
   9.0150000e-02
   7.1530000e-02
   4.4720000e-02
   1.0040000e-02
   2.2070000e-02
  -1.8730000e-02
  -8.5300000e-03
  -7.8400000e-03
  -5.2940000e-02
  -3.3720000e-02
   4.5760000e-02
  -2.7750000e-02
   2.6650000e-02
   3.9100000e-02
   2.3740000e-02
   3.2680000e-02
   2.7770000e-02
   2.6510000e-02
  -2.7660000e-02
   9.9500000e-03
  -5.2970000e-02
  -9.3930000e-02
  -3.0160000e-02
  -7.0140000e-02
  -6.0290000e-02
  -6.9560000e-02
  -2.2480000e-02
  -3.6850000e-02
  -1.7850000e-02
   7.3800000e-03
  -2.0560000e-02
   3.5420000e-02
   3.3000000e-04
  -4.4400000e-03
   1.3220000e-02
   1.6340000e-02
   3.8300000e-02
  -2.5690000e-02
   2.5960000e-02
   3.6880000e-02
   5.4600000e-03
   9.3500000e-03
   3.3700000e-03
   2.0760000e-02
  -1.3410000e-02
   4.2390000e-02
   3.8550000e-02
   2.4180000e-02
   5.2010000e-02
   5.8810000e-02
   1.0002000e-01
   5.9440000e-02
   5.4560000e-02
   8.1210000e-02
   6.4320000e-02
   7.7920000e-02
   3.0430000e-02
   7.6800000e-02
   5.7470000e-02
   8.3210000e-02
   6.0100000e-02
   3.7070000e-02
   6.4730000e-02
   3.2460000e-02
  -3.0200000e-03
   2.1520000e-02
  -6.6900000e-03
  -4.6600000e-03
  -2.6920000e-02
   8.3600000e-03
  -2.7800000e-02
  -4.0690000e-02
  -9.4900000e-03
  -2.2590000e-02
  -4.2500000e-02
  -3.0400000e-03
  -2.0560000e-02
  -1.4860000e-02
  -4.1950000e-02
   3.0400000e-03
  -3.9370000e-02
  -7.0680000e-02
  -5.1270000e-02
  -6.7700000e-02
  -7.4470000e-02
  -4.5930000e-02
  -5.2180000e-02
   1.6640000e-02
  -1.2480000e-02
  -1.2670000e-02
   4.0110000e-02
   5.8620000e-02
   2.9100000e-03
  -2.5360000e-02
   5.4100000e-02
   2.5390000e-02
   1.3540000e-02
   4.9490000e-02
   5.1930000e-02
   9.7990000e-02
   5.9060000e-02
   6.3140000e-02
   1.0838000e-01
   7.3450000e-02
   9.4000000e-03
   4.7760000e-02
   4.4390000e-02
   3.2850000e-02
  -2.0450000e-02
   2.5250000e-02
   9.1900000e-03
   1.1870000e-02
   1.2970000e-02
   6.2500000e-03
   4.0300000e-03
   6.8740000e-02
   6.8710000e-02
   4.4750000e-02
   3.2300000e-02
   9.5500000e-02
   5.2090000e-02
   4.1400000e-02
   3.4850000e-02
   1.0470000e-02
  -6.2000000e-03
  -4.0630000e-02
  -6.5310000e-02
  -2.2430000e-02
   3.0700000e-03
  -4.5950000e-02
   3.0350000e-02
   4.6280000e-02
  -2.1850000e-02
  -2.0020000e-02
   2.8870000e-02
  -6.8000000e-03
  -3.5860000e-02
  -1.9030000e-02
  -1.6010000e-02
  -2.1360000e-02
  -2.9300000e-03
  -6.7750000e-02
  -4.1680000e-02
  -2.3610000e-02
  -6.7230000e-02
  -6.3530000e-02
  -5.1490000e-02
   2.7400000e-03
  -1.3850000e-02
  -3.6200000e-03
   2.4180000e-02
   6.9400000e-03
   6.5260000e-02
   2.0730000e-02
   2.6600000e-02
   7.6060000e-02
   5.0010000e-02
   3.2550000e-02
   3.4630000e-02
   4.6800000e-02
   7.4800000e-02
   6.7390000e-02
   5.2590000e-02
   5.0610000e-02
   6.5830000e-02
   7.3510000e-02
   1.2390000e-02
   8.8070000e-02
   7.2550000e-02
   4.0250000e-02
   6.7640000e-02
   4.4120000e-02
   9.6320000e-02
  -8.2300000e-03
  -2.2890000e-02
   6.5910000e-02
   1.9740000e-02
  -1.7270000e-02
  -8.2000000e-04
   1.3760000e-02
  -3.5560000e-02
  -3.8550000e-02
   1.0970000e-02
  -1.0360000e-02
   9.0500000e-03
   5.0400000e-03
  -4.3270000e-02
  -5.8400000e-03
   4.6600000e-03
  -3.6360000e-02
   1.0400000e-03
  -2.1630000e-02
  -6.5530000e-02
  -2.4160000e-02
  -2.1850000e-02
  -1.3520000e-02
  -5.5960000e-02
  -6.9100000e-03
   2.0100000e-02
  -2.1900000e-03
   1.1300000e-02
   2.3170000e-02
   1.2230000e-02
  -3.5400000e-03
   2.6900000e-02
   9.4900000e-03
   1.5270000e-02
  -1.6500000e-03
   5.4340000e-02
   3.1300000e-03
   7.5700000e-03
   3.0110000e-02
   3.2460000e-02
   4.3300000e-03
  -2.9040000e-02
   3.7290000e-02
   4.8040000e-02
   7.1300000e-03
   9.8020000e-02
   6.5040000e-02
   9.2040000e-02
   6.8270000e-02
   8.2450000e-02
   9.5830000e-02
   1.2280000e-02
  -1.1200000e-03
   2.9750000e-02
   1.6400000e-02
   1.4040000e-02
  -4.4660000e-02
   6.0290000e-02
   2.2780000e-02
   6.6000000e-04
   3.2270000e-02
   4.5080000e-02
   4.0030000e-02
  -4.7980000e-02
   4.6600000e-03
   2.1330000e-02
  -3.1670000e-02
  -2.7720000e-02
  -3.2330000e-02
  -1.2500000e-02
  -2.1280000e-02
  -1.8260000e-02
  -1.9660000e-02
  -4.7900000e-02
  -2.0920000e-02
  -1.9410000e-02
  -2.2400000e-02
  -1.3110000e-02
  -2.8380000e-02
  -1.6860000e-02
  -8.0900000e-03
  -4.4000000e-04
  -2.6730000e-02
  -4.2030000e-02
  -3.1610000e-02
   1.7300000e-03
   1.4860000e-02
   1.8840000e-02
   4.4700000e-03
   1.1650000e-02
   3.1480000e-02
   7.3500000e-03
   8.8000000e-04
   3.5890000e-02
   8.0100000e-03
   1.6890000e-02
   1.6510000e-02
   1.6290000e-02
   4.7600000e-02
   4.8150000e-02
   1.0580000e-02
   5.7300000e-02
   6.6790000e-02
   6.0350000e-02
   3.6380000e-02
   5.5960000e-02
   5.4840000e-02
   6.1390000e-02
   4.1570000e-02
   5.3740000e-02
   7.1070000e-02
   6.5360000e-02
   4.0060000e-02
   3.8520000e-02
   5.6070000e-02
  -1.7270000e-02
   1.7900000e-02
   2.7170000e-02
   9.0800000e-03
  -2.4730000e-02
  -1.5030000e-02
  -7.4300000e-03
   4.9100000e-03
  -3.0380000e-02
  -6.5750000e-02
   1.3790000e-02
  -5.6200000e-03
  -2.8680000e-02
  -1.2340000e-02
   3.9590000e-02
  -4.0550000e-02
  -8.3900000e-02
   6.7400000e-03
  -4.3240000e-02
  -4.7650000e-02
  -2.3300000e-03
  -5.7110000e-02
  -2.5800000e-03
  -1.7960000e-02
   9.0000000e-04
   6.3100000e-03
  -2.9970000e-02
  -3.0000000e-05
   1.0910000e-02
   1.0700000e-03
   1.5980000e-02
   4.3380000e-02
   1.4970000e-02
   3.0400000e-03
   3.6080000e-02
   7.0570000e-02
   1.9660000e-02
   2.1470000e-02
   4.7410000e-02
   5.8890000e-02
   4.2470000e-02
   1.5110000e-02
   4.3320000e-02
   3.4440000e-02
   3.1420000e-02
   4.5020000e-02
   6.7780000e-02
  -2.4350000e-02
   3.5590000e-02
   3.9620000e-02
   2.1280000e-02
   8.2060000e-02
   3.3890000e-02
   4.4550000e-02
   5.0070000e-02
   5.2530000e-02
   4.4940000e-02
  -1.2390000e-02
  -2.4100000e-03
   4.7840000e-02
  -8.6600000e-03
   3.1640000e-02
   2.1190000e-02
   3.7890000e-02
   4.6640000e-02
  -1.3870000e-02
   4.7900000e-02
  -1.5900000e-03
  -3.3450000e-02
  -3.2570000e-02
  -5.9630000e-02
  -3.1780000e-02
  -5.2530000e-02
  -3.9700000e-02
  -3.2600000e-02
  -6.2730000e-02
  -5.0810000e-02
  -2.0840000e-02
  -2.6570000e-02
  -2.6600000e-03
  -3.7750000e-02
  -2.1720000e-02
   2.0510000e-02
   1.7900000e-02
  -1.0120000e-02
  -3.4550000e-02
  -5.4800000e-03
   8.4200000e-03
  -2.6620000e-02
  -2.9310000e-02
   2.1250000e-02
   1.2150000e-02
   4.2360000e-02
   4.0170000e-02
   9.7360000e-02
   1.0150000e-01
   9.6270000e-02
   1.1135000e-01
   8.9930000e-02
   8.0420000e-02
   1.0345000e-01
   3.8820000e-02
   7.6830000e-02
  -7.8100000e-03
   2.5530000e-02
   1.2720000e-02
   1.2060000e-02
   2.4400000e-02
  -3.0790000e-02
   2.4210000e-02
   1.7770000e-02
   2.6350000e-02
   6.9340000e-02
   3.6330000e-02
   3.7100000e-02
   4.5600000e-02
   5.0610000e-02
   2.1690000e-02
   8.0900000e-03
   1.1270000e-02
  -2.3220000e-02
  -5.0860000e-02
  -4.3790000e-02
  -7.0600000e-02
  -6.6600000e-02
  -4.1260000e-02
  -3.5010000e-02
  -3.6360000e-02
  -2.1390000e-02
   9.2400000e-03
   2.8600000e-02
   2.1080000e-02
   1.8120000e-02
  -8.2800000e-03
   1.9710000e-02
  -2.2920000e-02
  -4.9270000e-02
  -6.8930000e-02
  -5.2700000e-02
  -2.3200000e-02
  -3.3860000e-02
  -1.7270000e-02
  -1.5850000e-02
   1.7000000e-03
   7.5130000e-02
   3.8600000e-02
   4.1430000e-02
   3.8110000e-02
   4.2800000e-02
   6.4020000e-02
   2.7750000e-02
   5.6290000e-02
   2.3550000e-02
   7.2550000e-02
   1.7470000e-02
   5.1110000e-02
   1.0537000e-01
   3.7670000e-02
   3.1010000e-02
   4.8120000e-02
   8.7030000e-02
   2.5800000e-02
   6.6680000e-02
   8.2970000e-02
   3.9240000e-02
   6.7810000e-02
   3.9950000e-02
   2.2020000e-02
   2.6900000e-02
  -7.1000000e-03
   1.6510000e-02
   4.4990000e-02
   8.6400000e-03
   1.5490000e-02
  -4.9600000e-03
   1.1200000e-03
  -2.9860000e-02
  -3.3780000e-02
  -8.6600000e-03
  -2.5030000e-02
  -5.9360000e-02
  -5.6620000e-02
   2.5200000e-03
  -4.4000000e-04
  -4.7020000e-02
  -2.2570000e-02
   2.4700000e-02
  -2.8160000e-02
  -2.6980000e-02
  -1.5330000e-02
   6.4400000e-03
  -3.5600000e-03
  -2.2650000e-02
  -5.2400000e-03
  -2.1330000e-02
  -5.6590000e-02
  -3.5120000e-02
  -3.6500000e-03
   6.3100000e-03
   2.0670000e-02
   3.1280000e-02
   4.6890000e-02
   3.1500000e-02
   6.3970000e-02
   6.3030000e-02
  -2.4100000e-03
   3.8390000e-02
   4.4280000e-02
  -3.9200000e-03
   6.8500000e-03
   6.5860000e-02
   6.1390000e-02
   5.8260000e-02
   1.0581000e-01
   1.0019000e-01
   9.4650000e-02
   6.7200000e-02
   5.2120000e-02
   4.5950000e-02
   3.5840000e-02
   5.0150000e-02
   1.5660000e-02
   2.5390000e-02
   1.0670000e-02
  -3.9500000e-03
   6.8800000e-03
   4.6600000e-03
   1.6310000e-02
   6.3000000e-04
  -8.1200000e-03
  -5.6500000e-03
   2.0210000e-02
   1.0750000e-02
  -2.0730000e-02
   4.9870000e-02
   1.4390000e-02
  -3.6110000e-02
  -1.9410000e-02
  -6.3100000e-03
  -7.7510000e-02
  -6.0160000e-02
  -6.5640000e-02
  -7.7540000e-02
  -6.7450000e-02
  -7.3540000e-02
  -5.6180000e-02
  -1.0360000e-02
  -3.2900000e-02
  -1.8290000e-02
   2.0780000e-02
   2.0290000e-02
   4.4340000e-02
   6.9100000e-03
   2.1410000e-02
   4.2250000e-02
   4.0000000e-03
  -7.8100000e-03
  -2.5030000e-02
   2.1110000e-02
   3.5900000e-03
  -4.8300000e-03
   1.5110000e-02
   4.0740000e-02
   9.1820000e-02
   6.4160000e-02
   6.3860000e-02
   9.8210000e-02
   5.0090000e-02
   5.6180000e-02
   1.9360000e-02
   7.4000000e-02
   8.9710000e-02
   1.2310000e-02
   6.9370000e-02
   6.5670000e-02
   6.5670000e-02
   2.9640000e-02
   6.5690000e-02
   6.9200000e-02
   3.5150000e-02
   1.7160000e-02
   1.4120000e-02
   1.6180000e-02
   2.8840000e-02
  -1.7250000e-02
  -1.7490000e-02
   5.5900000e-03
   8.0900000e-03
  -2.3830000e-02
   1.9740000e-02
   2.3900000e-03
  -3.0400000e-03
  -1.5630000e-02
  -2.8800000e-03
  -2.6000000e-03
  -3.2710000e-02
  -3.6660000e-02
  -2.8870000e-02
  -2.8930000e-02
  -3.1150000e-02
  -7.4250000e-02
  -5.3880000e-02
  -4.6310000e-02
  -5.9690000e-02
  -8.6370000e-02
  -6.0050000e-02
   4.4880000e-02
  -1.9700000e-03
  -7.6800000e-03
   3.2130000e-02
   2.8840000e-02
   8.7500000e-03
  -1.4260000e-02
   6.0000000e-03
   5.9440000e-02
  -9.1300000e-03
   3.5400000e-02
   2.8870000e-02
   2.8100000e-02
   5.5660000e-02
  -3.1500000e-03
   4.5290000e-02
   7.4140000e-02
   4.6800000e-02
   6.3250000e-02
   7.1340000e-02
   1.0216000e-01
   7.8390000e-02
   8.6780000e-02
   1.1993000e-01
   6.1280000e-02
   7.8660000e-02
   8.3300000e-02
   3.8410000e-02
   4.7980000e-02
   2.4760000e-02
   1.2120000e-02
   1.3540000e-02
  -3.2930000e-02
  -4.0390000e-02
  -5.5990000e-02
  -2.5750000e-02
  -6.0000000e-04
   1.5770000e-02
   4.3840000e-02
   1.0010000e-02
   3.3370000e-02
   6.5010000e-02
  -1.5820000e-02
  -3.7150000e-02
  -5.0370000e-02
  -7.1400000e-02
  -8.2750000e-02
  -1.3945000e-01
  -5.8320000e-02
  -5.6120000e-02
  -5.3600000e-02
   1.0530000e-02
   3.0600000e-02
   3.8960000e-02
  -1.5350000e-02
   2.8350000e-02
   5.6890000e-02
  -1.9550000e-02
  -2.0970000e-02
  -4.7000000e-04
  -1.4720000e-02
  -2.2620000e-02
  -4.7630000e-02
  -8.7700000e-03
  -5.4000000e-03
  -5.8100000e-03
   3.7970000e-02
   5.4320000e-02
   2.2480000e-02
   8.1380000e-02
   3.2680000e-02
   1.0866000e-01
   8.3430000e-02
   3.5040000e-02
   1.1198000e-01
   6.2270000e-02
   1.0008000e-01
   6.3230000e-02
   5.4430000e-02
   9.6900000e-02
   2.4430000e-02
   3.8000000e-02
   2.2430000e-02
  -1.4180000e-02
  -1.2280000e-02
   5.8900000e-03
   2.6540000e-02
   1.2010000e-02
   6.0240000e-02
   9.4760000e-02
   5.2940000e-02
   5.4070000e-02
   6.5010000e-02
   1.0090000e-02
   3.7970000e-02
   2.2000000e-04
  -5.3710000e-02
  -3.4030000e-02
  -2.2320000e-02
  -2.3910000e-02
  -2.0840000e-02
  -7.7100000e-02
  -5.7660000e-02
  -3.9350000e-02
  -5.5440000e-02
  -5.2090000e-02
  -6.8460000e-02
  -2.3090000e-02
  -2.6050000e-02
  -4.4200000e-02
  -8.8000000e-03
   5.7900000e-03
  -7.4600000e-03
   2.9500000e-02
  -1.6120000e-02
   3.5640000e-02
   1.8600000e-03
   1.6000000e-04
   6.5000000e-03
   2.7400000e-03
   5.6500000e-03
   4.7200000e-03
   1.6810000e-02
   3.6880000e-02
   7.0660000e-02
   4.6250000e-02
   7.1340000e-02
   1.1941000e-01
   1.0918000e-01
   5.9550000e-02
   3.1370000e-02
   1.1143000e-01
   3.9070000e-02
   5.6920000e-02
   4.1480000e-02
   3.0870000e-02
   1.0915000e-01
   3.5750000e-02
   5.4950000e-02
   1.9850000e-02
   1.1020000e-02
   3.4410000e-02
   7.5900000e-03
   2.1330000e-02
  -2.3200000e-02
   3.5180000e-02
   5.1900000e-02
  -1.3900000e-02
   5.9960000e-02
   1.9470000e-02
   3.3120000e-02
   3.7070000e-02
   2.3170000e-02
  -1.0060000e-02
  -7.1620000e-02
  -1.5520000e-02
  -4.0990000e-02
  -9.1410000e-02
  -7.0520000e-02
  -1.0183000e-01
  -3.1560000e-02
  -5.2590000e-02
  -7.6000000e-02
  -2.2730000e-02
  -2.3800000e-02
  -6.8000000e-03
  -9.7300000e-03
   3.3860000e-02
   5.7740000e-02
  -1.7770000e-02
   3.0200000e-03
   4.2580000e-02
   1.2300000e-03
  -4.9790000e-02
  -5.4840000e-02
   4.4000000e-04
  -4.5380000e-02
  -2.8430000e-02
   1.2170000e-02
  -1.0830000e-02
   6.9530000e-02
   8.4720000e-02
   6.3030000e-02
   7.4600000e-02
   1.3811000e-01
   8.9140000e-02
   9.9640000e-02
   6.4570000e-02
   1.4430000e-01
   5.6590000e-02
   4.0140000e-02
   6.1010000e-02
   8.3600000e-03
   4.1890000e-02
  -1.6590000e-02
   5.0400000e-03
   1.7300000e-02
   2.2000000e-04
   1.1410000e-02
   4.1040000e-02
   7.3810000e-02
   6.1830000e-02
   5.4950000e-02
   4.4640000e-02
   3.5070000e-02
   1.1430000e-02
   2.7250000e-02
   7.9000000e-03
   4.0110000e-02
  -3.7620000e-02
  -8.3240000e-02
  -3.5070000e-02
  -7.6630000e-02
  -1.2141000e-01
  -9.7140000e-02
  -7.7730000e-02
  -1.2415000e-01
  -8.3270000e-02
  -6.2790000e-02
  -2.6650000e-02
   5.8700000e-03
   5.1900000e-02
   2.2730000e-02
   3.4140000e-02
   6.4380000e-02
   1.4890000e-02
   1.7740000e-02
  -1.9200000e-03
   1.0040000e-02
  -4.3400000e-02
  -4.5870000e-02
   1.0890000e-02
  -3.3670000e-02
  -2.5530000e-02
  -1.4500000e-03
   2.7660000e-02
   4.2640000e-02
   6.8410000e-02
   7.3540000e-02
   1.0274000e-01
   1.1535000e-01
   1.2204000e-01
   9.2020000e-02
   1.5741000e-01
   1.0940000e-01
   8.6090000e-02
   8.2010000e-02
   7.0030000e-02
   4.2960000e-02
   2.0320000e-02
   2.0480000e-02
  -2.8210000e-02
   9.4300000e-03
  -1.2830000e-02
  -2.8320000e-02
   3.5100000e-03
   6.9400000e-03
   4.8170000e-02
   3.1200000e-02
   5.7140000e-02
   5.9420000e-02
   4.0500000e-02
   6.5120000e-02
  -6.0300000e-03
   6.9400000e-03
  -8.7500000e-03
  -1.1033000e-01
  -6.0620000e-02
  -9.8160000e-02
  -6.6760000e-02
  -1.1719000e-01
  -1.2250000e-01
  -1.8560000e-02
  -3.8930000e-02
  -3.3090000e-02
  -1.5270000e-02
   5.8020000e-02
  -1.5570000e-02
  -2.8540000e-02
   2.9910000e-02
  -3.4300000e-03
  -9.7300000e-03
   7.7000000e-04
  -3.9780000e-02
  -3.7890000e-02
   2.4400000e-03
  -2.1850000e-02
  -3.9650000e-02
   2.4700000e-03
  -1.6290000e-02
   3.1530000e-02
   5.4150000e-02
   6.6110000e-02
   1.0194000e-01
   9.3960000e-02
   1.2845000e-01
   1.2176000e-01
   1.1513000e-01
   6.0370000e-02
   9.9090000e-02
   8.3760000e-02
   3.3310000e-02
   3.3200000e-03
   2.9390000e-02
   6.4430000e-02
   2.5360000e-02
   2.8410000e-02
   6.1390000e-02
   9.2100000e-02
   5.3250000e-02
   3.4520000e-02
   1.0274000e-01
   4.4640000e-02
   5.0530000e-02
   4.0280000e-02
  -1.8260000e-02
  -1.0010000e-02
  -4.1540000e-02
  -4.9460000e-02
  -3.7620000e-02
  -6.1120000e-02
  -3.5180000e-02
  -7.9700000e-02
  -3.3750000e-02
  -3.1260000e-02
  -9.4840000e-02
  -4.0990000e-02
  -3.5670000e-02
  -5.1880000e-02
  -5.4700000e-02
  -3.9240000e-02
  -3.2100000e-03
  -4.2830000e-02
  -1.0310000e-02
  -2.9010000e-02
  -6.0240000e-02
   3.0000000e-04
  -2.6130000e-02
  -3.1610000e-02
  -4.4880000e-02
  -4.1000000e-04
   2.6000000e-03
   1.0500000e-02
   2.8620000e-02
   3.8440000e-02
   4.3760000e-02
   3.7670000e-02
   6.3610000e-02
   6.8380000e-02
   6.8710000e-02
   5.1710000e-02
   6.5260000e-02
   9.8570000e-02
   8.7700000e-03
   5.1980000e-02
   5.6920000e-02
   5.4670000e-02
   5.7060000e-02
   8.0990000e-02
   1.0136000e-01
   6.8000000e-02
   1.0975000e-01
   6.9260000e-02
   5.2230000e-02
   6.4570000e-02
   3.3290000e-02
  -9.8700000e-03
  -8.5800000e-03
   3.1000000e-03
   2.7500000e-02
  -4.7840000e-02
  -1.5680000e-02
  -2.8000000e-03
   9.0500000e-03
  -2.4290000e-02
   1.7800000e-03
  -1.7000000e-02
  -1.2890000e-02
  -1.0420000e-02
  -1.8700000e-02
  -1.3190000e-02
  -5.5490000e-02
  -2.9640000e-02
  -3.6140000e-02
  -7.9920000e-02
  -5.5770000e-02
  -7.9290000e-02
  -2.1170000e-02
  -3.8550000e-02
  -1.7680000e-02
  -7.4000000e-03
  -1.9740000e-02
  -7.6500000e-03
  -1.9140000e-02
   3.0400000e-03
  -1.9200000e-03
   9.8400000e-03
  -6.0900000e-03
   1.3240000e-02
   6.4680000e-02
   3.4440000e-02
   1.5850000e-02
   5.9060000e-02
   5.3710000e-02
   1.4860000e-02
   2.2730000e-02
   4.0740000e-02
   4.4660000e-02
   2.1170000e-02
   8.0120000e-02
   6.7170000e-02
   8.0120000e-02
   1.0526000e-01
   7.5210000e-02
   1.1754000e-01
   7.6520000e-02
   1.7257000e-01
   9.4480000e-02
   5.0700000e-02
   6.7120000e-02
   8.0600000e-03
  -3.3500000e-03
  -3.9980000e-02
  -5.3270000e-02
  -2.1390000e-02
  -3.8710000e-02
   1.2170000e-02
   6.4840000e-02
   6.4240000e-02
   5.3790000e-02
   2.2670000e-02
   6.8850000e-02
   1.1540000e-02
  -4.8450000e-02
  -3.9670000e-02
  -9.8920000e-02
  -1.2566000e-01
  -1.0507000e-01
  -9.9830000e-02
  -8.2420000e-02
  -7.7810000e-02
  -5.6700000e-02
  -7.0660000e-02
  -1.1080000e-02
   1.3300000e-02
   1.8840000e-02
   1.9410000e-02
   2.5010000e-02
   3.6880000e-02
   4.5760000e-02
  -8.4700000e-03
   1.1570000e-02
   1.4700000e-02
  -3.5400000e-02
  -2.2890000e-02
   2.0040000e-02
   1.1200000e-03
  -2.2620000e-02
   2.4160000e-02
   6.8630000e-02
   6.7420000e-02
   5.7500000e-02
   7.4930000e-02
   9.9830000e-02
   1.3909000e-01
   5.4890000e-02
   5.9770000e-02
   1.0693000e-01
   6.4620000e-02
   2.9280000e-02
   5.3520000e-02
   3.4880000e-02
   2.9360000e-02
  -3.9350000e-02
  -3.1800000e-03
   9.7300000e-03
   4.2500000e-03
  -8.5500000e-03
   1.7250000e-02
   7.1420000e-02
   2.3250000e-02
   5.0450000e-02
   6.7060000e-02
   7.0850000e-02
  -1.7800000e-03
   3.6630000e-02
   1.5740000e-02
  -3.1830000e-02
  -9.8400000e-03
  -1.6860000e-02
  -5.1930000e-02
  -8.7980000e-02
  -5.0010000e-02
  -7.5950000e-02
  -5.5110000e-02
  -5.6020000e-02
  -3.0760000e-02
  -9.5100000e-03
   5.4300000e-03
   7.4360000e-02
   2.3090000e-02
   2.4840000e-02
   3.0130000e-02
   3.4800000e-03
   3.1000000e-03
  -5.6040000e-02
  -4.8060000e-02
  -5.5800000e-02
  -3.8550000e-02
  -2.1410000e-02
  -5.9200000e-02
  -6.3600000e-03
   1.4530000e-02
   5.5400000e-03
   5.7000000e-02
   4.0740000e-02
   4.4550000e-02
   7.2880000e-02
   9.1550000e-02
   7.7320000e-02
   9.7500000e-02
   5.4730000e-02
   3.0630000e-02
   6.6130000e-02
   3.0760000e-02
   3.8820000e-02
   4.1000000e-04
   4.8280000e-02
   1.7960000e-02
   3.0650000e-02
   4.5430000e-02
   4.2640000e-02
   8.2830000e-02
   2.3740000e-02
   4.9680000e-02
   3.5180000e-02
   4.3490000e-02
   5.2400000e-02
   9.0200000e-03
   7.9400000e-02
   3.0000000e-02
  -1.2750000e-02
   3.3610000e-02
  -1.6620000e-02
  -3.4030000e-02
  -7.8550000e-02
  -4.7210000e-02
  -9.2100000e-02
  -5.7470000e-02
  -4.8040000e-02
  -3.2740000e-02
  -4.0600000e-03
  -1.1200000e-03
  -2.6510000e-02
  -2.6290000e-02
   5.4800000e-03
  -3.0850000e-02
  -4.5710000e-02
  -3.4030000e-02
  -5.9500000e-03
   1.7490000e-02
  -4.9570000e-02
  -1.0360000e-02
   2.3170000e-02
  -4.7200000e-03
  -8.5000000e-03
  -2.3500000e-02
  -4.9000000e-04
   2.2950000e-02
   1.2310000e-02
   3.7750000e-02
   4.5160000e-02
   5.7030000e-02
   5.9060000e-02
   2.3550000e-02
   9.0780000e-02
   4.4140000e-02
   5.3770000e-02
   7.6880000e-02
   6.2270000e-02
   1.1233000e-01
   4.7320000e-02
   6.9920000e-02
   3.4930000e-02
   4.0090000e-02
   6.8820000e-02
  -1.5770000e-02
   6.3690000e-02
   6.2020000e-02
   6.1770000e-02
   2.4100000e-02
   7.7620000e-02
   7.7730000e-02
   1.8530000e-02
   3.4410000e-02
   1.9660000e-02
   3.9320000e-02
  -9.5100000e-03
   3.9540000e-02
   3.2110000e-02
  -1.3020000e-02
  -9.0800000e-03
  -1.4890000e-02
  -1.8530000e-02
  -5.2180000e-02
  -9.5440000e-02
  -3.1720000e-02
  -3.3340000e-02
  -6.7700000e-03
  -6.4710000e-02
  -2.6950000e-02
   1.7520000e-02
  -3.8030000e-02
  -5.0830000e-02
  -4.7100000e-02
  -1.8450000e-02
  -4.3020000e-02
  -3.3310000e-02
  -3.5450000e-02
   2.0450000e-02
  -2.7030000e-02
  -2.0070000e-02
  -4.6200000e-02
  -1.4970000e-02
  -2.3990000e-02
  -1.1650000e-02
   5.1490000e-02
   1.6970000e-02
   6.7910000e-02
   5.8130000e-02
   9.5060000e-02
   7.6770000e-02
   8.2230000e-02
   4.5000000e-03
   3.3420000e-02
   4.4720000e-02
   5.3630000e-02
   5.7170000e-02
   3.8060000e-02
   7.5040000e-02
   6.9340000e-02
   8.3760000e-02
   9.9990000e-02
   1.2050000e-01
   7.5450000e-02
   8.7770000e-02
   1.1277000e-01
   7.9760000e-02
   7.0140000e-02
   3.7510000e-02
  -6.4400000e-03
   2.9340000e-02
  -1.1600000e-02
  -7.2410000e-02
  -7.5130000e-02
  -2.9200000e-02
  -1.7380000e-02
  -7.7480000e-02
   4.6420000e-02
   3.0930000e-02
  -2.9780000e-02
  -9.9800000e-03
   1.6700000e-03
  -1.2090000e-02
  -3.4520000e-02
  -4.4170000e-02
  -5.6810000e-02
  -5.3380000e-02
  -3.8080000e-02
  -1.1573000e-01
  -7.2330000e-02
  -8.6310000e-02
  -9.0450000e-02
  -8.5490000e-02
  -6.9450000e-02
  -5.5880000e-02
  -5.8780000e-02
   3.7480000e-02
   2.3200000e-02
   7.3450000e-02
   9.4650000e-02
   9.0530000e-02
   7.2520000e-02
   2.5250000e-02
   7.0000000e-02
   2.1220000e-02
   1.0040000e-02
   3.3920000e-02
   1.5880000e-02
   9.0800000e-03
   4.9100000e-03
   6.1330000e-02
   4.8720000e-02
   3.4440000e-02
   1.0737000e-01
   1.0326000e-01
   1.3024000e-01
   1.3142000e-01
   1.2467000e-01
   1.4951000e-01
   6.7750000e-02
   7.7510000e-02
   4.4280000e-02
   3.5100000e-02
  -7.6200000e-03
  -3.7100000e-02
   1.2530000e-02
  -5.7600000e-03
  -8.6400000e-03
  -3.0600000e-02
  -2.9690000e-02
   5.8100000e-03
  -4.1700000e-02
  -5.2900000e-03
  -2.1000000e-02
   1.0970000e-02
  -5.8700000e-03
  -1.8780000e-02
   3.7970000e-02
  -1.6200000e-02
  -3.4740000e-02
  -3.0270000e-02
  -3.4960000e-02
  -8.0280000e-02
  -9.6210000e-02
  -1.1642000e-01
  -8.1400000e-02
  -3.5150000e-02
  -7.2520000e-02
  -3.6440000e-02
   6.2000000e-03
   1.4750000e-02
   5.2400000e-03
   2.8020000e-02
   4.2360000e-02
   1.3190000e-02
   4.7490000e-02
   9.8400000e-03
   2.2130000e-02
   1.1200000e-03
  -1.0530000e-02
   5.3200000e-03
  -1.3700000e-03
   2.7500000e-02
   4.0000000e-02
   2.6730000e-02
   1.0978000e-01
   1.2667000e-01
   1.0635000e-01
   1.3081000e-01
   9.1820000e-02
   8.5900000e-02
   9.1470000e-02
   5.0590000e-02
   3.5310000e-02
   6.1420000e-02
   5.7500000e-02
   2.1850000e-02
  -1.9220000e-02
   6.3200000e-02
   7.8200000e-02
   1.7660000e-02
   1.6230000e-02
   4.0470000e-02
   6.4710000e-02
  -7.4000000e-03
  -2.3900000e-03
   4.4100000e-03
  -1.5850000e-02
  -9.9000000e-04
  -4.0880000e-02
  -2.9580000e-02
  -6.1390000e-02
  -9.7170000e-02
  -3.8850000e-02
  -7.7240000e-02
  -8.6390000e-02
  -5.8100000e-02
  -3.0130000e-02
  -5.3000000e-02
  -8.4060000e-02
  -6.0540000e-02
  -5.0860000e-02
  -2.6020000e-02
  -1.8100000e-02
   2.9300000e-03
   1.3930000e-02
   1.4670000e-02
   2.4480000e-02
   2.1390000e-02
   2.3880000e-02
  -3.4220000e-02
  -5.7600000e-03
   7.8100000e-03
  -1.1870000e-02
   1.5600000e-03
  -4.1400000e-03
   6.1220000e-02
   7.3400000e-02
   7.3590000e-02
   1.1738000e-01
   1.1255000e-01
   1.0608000e-01
   1.2763000e-01
   1.0101000e-01
   1.1143000e-01
   1.0120000e-01
   8.8810000e-02
   1.0715000e-01
   1.1350000e-02
   1.0500000e-02
   5.7170000e-02
   4.4090000e-02
   3.0760000e-02
   3.8300000e-02
   9.2450000e-02
   5.3880000e-02
   1.0860000e-02
   6.4680000e-02
  -1.3900000e-02
   2.4100000e-03
  -1.6620000e-02
  -3.6250000e-02
  -2.3420000e-02
  -4.8670000e-02
  -2.9780000e-02
  -3.0320000e-02
  -4.0520000e-02
  -1.8620000e-02
  -9.1800000e-02
  -4.0800000e-02
  -6.8710000e-02
  -7.1890000e-02
  -4.1790000e-02
  -3.0540000e-02
   4.9100000e-03
  -5.4530000e-02
  -3.2050000e-02
  -1.5270000e-02
  -6.2710000e-02
  -9.1380000e-02
  -6.8760000e-02
  -8.5790000e-02
  -4.6140000e-02
  -1.7660000e-02
   2.9420000e-02
   2.4350000e-02
   9.5000000e-02
   1.2371000e-01
   5.3360000e-02
   8.4580000e-02
   5.8840000e-02
   1.6590000e-02
   3.5310000e-02
   2.1330000e-02
   2.2290000e-02
   1.5600000e-03
   7.9800000e-03
   6.2900000e-02
   3.2930000e-02
   5.0500000e-02
   5.8890000e-02
   1.1960000e-01
   1.2818000e-01
   1.0954000e-01
   1.0479000e-01
   9.9690000e-02
   1.4836000e-01
   6.7700000e-02
   5.2090000e-02
   4.4470000e-02
   2.0760000e-02
   3.7400000e-02
   1.8560000e-02
   4.4000000e-04
   6.7200000e-03
   3.2710000e-02
  -5.5030000e-02
  -3.9950000e-02
   2.7940000e-02
  -4.4090000e-02
  -4.9160000e-02
   1.7990000e-02
   1.2750000e-02
   4.2200000e-03
   5.0400000e-03
   1.7300000e-02
   2.1700000e-03
  -7.0030000e-02
  -5.8810000e-02
  -9.4350000e-02
  -1.0232000e-01
  -1.1845000e-01
  -1.3344000e-01
  -9.4840000e-02
  -8.0060000e-02
  -5.6370000e-02
  -5.5330000e-02
  -2.8500000e-03
   8.3600000e-03
   3.4570000e-02
   5.7000000e-03
   5.6780000e-02
   7.1970000e-02
   3.6330000e-02
   7.6610000e-02
   5.2070000e-02
   6.8870000e-02
   6.6600000e-03
   1.4010000e-02
   4.9900000e-02
   3.6900000e-02
   4.0220000e-02
   2.4900000e-02
   6.6110000e-02
   8.5650000e-02
   9.2320000e-02
   1.1428000e-01
   9.8540000e-02
   1.1647000e-01
   1.0202000e-01
   6.2020000e-02
   1.1436000e-01
   9.1380000e-02
   5.3030000e-02
   7.3230000e-02
   5.7190000e-02
   3.5670000e-02
   7.2900000e-03
   1.0100000e-03
  -7.4110000e-02
  -3.2760000e-02
  -5.0720000e-02
  -8.0170000e-02
  -2.6540000e-02
  -1.0170000e-02
  -3.6900000e-02
  -3.0130000e-02
   3.6990000e-02
   1.8120000e-02
  -3.5840000e-02
   8.6600000e-03
  -1.1870000e-02
   1.5490000e-02
  -2.8020000e-02
  -9.9470000e-02
  -6.6820000e-02
  -9.2230000e-02
  -9.5690000e-02
  -1.0460000e-01
  -5.1930000e-02
  -1.7250000e-02
  -9.0970000e-02
   3.2680000e-02
   6.3310000e-02
   5.4800000e-03
   1.2640000e-02
   3.0020000e-02
   3.6050000e-02
   2.3550000e-02
  -2.7100000e-03
  -1.7030000e-02
  -1.4280000e-02
   1.3050000e-02
   3.3420000e-02
   2.3090000e-02
   8.1540000e-02
   6.0180000e-02
   8.2040000e-02
   5.3000000e-02
   7.2690000e-02
   1.0142000e-01
   8.8560000e-02
   9.8350000e-02
   8.8260000e-02
   1.0671000e-01
   1.2577000e-01
   9.5580000e-02
   6.8660000e-02
   5.8460000e-02
   4.3650000e-02
  -8.5000000e-04
   1.0230000e-02
  -1.9190000e-02
   3.8100000e-03
  -4.8230000e-02
   1.2900000e-03
   8.6530000e-02
  -1.8600000e-03
   3.8360000e-02
   4.3510000e-02
   1.0466000e-01
   1.8590000e-02
   6.6000000e-04
   1.4500000e-03
  -4.6890000e-02
  -5.9440000e-02
  -1.0608000e-01
  -9.6950000e-02
  -9.3630000e-02
  -1.2722000e-01
  -9.4400000e-02
  -6.6980000e-02
  -4.5100000e-02
  -2.0450000e-02
  -1.3760000e-02
   2.7530000e-02
  -1.7900000e-02
  -2.3060000e-02
   5.8000000e-04
  -3.3500000e-02
  -4.4690000e-02
  -3.6050000e-02
  -1.9440000e-02
   4.8800000e-03
   3.6500000e-03
   3.9150000e-02
   3.1640000e-02
   3.9890000e-02
   5.8240000e-02
   3.4880000e-02
   7.0110000e-02
   3.5420000e-02
   8.9490000e-02
   9.8270000e-02
   3.7890000e-02
   5.8260000e-02
   1.2398000e-01
   9.2840000e-02
   5.9330000e-02
   8.4310000e-02
   1.2108000e-01
   5.3550000e-02
   2.7580000e-02
   1.1285000e-01
   4.3790000e-02
   7.6200000e-03
   6.0480000e-02
   4.6340000e-02
   4.1480000e-02
   2.7610000e-02
   6.6650000e-02
   6.3230000e-02
   5.2510000e-02
  -1.6920000e-02
  -2.0290000e-02
   2.5880000e-02
  -4.6200000e-02
  -1.0537000e-01
  -1.5300000e-02
  -7.0200000e-03
  -6.1580000e-02
  -5.7280000e-02
  -2.5310000e-02
  -2.0890000e-02
  -6.2430000e-02
  -2.2180000e-02
   8.2300000e-03
  -1.4830000e-02
  -8.6940000e-02
  -1.3930000e-02
  -1.5740000e-02
  -5.4100000e-02
  -4.0720000e-02
  -3.5970000e-02
  -7.1840000e-02
  -6.0370000e-02
  -8.2530000e-02
  -3.2380000e-02
  -4.5050000e-02
  -5.8100000e-03
   5.0340000e-02
   4.6360000e-02
   3.1150000e-02
   9.6760000e-02
   1.0224000e-01
   6.5530000e-02
   3.4410000e-02
   3.6630000e-02
   2.3330000e-02
   2.6320000e-02
   2.4870000e-02
   1.3160000e-02
   7.6360000e-02
   6.5830000e-02
   1.0290000e-01
   1.0282000e-01
   1.2308000e-01
   7.0270000e-02
   1.0762000e-01
   1.4205000e-01
   4.3620000e-02
   7.0160000e-02
   6.9780000e-02
   3.6690000e-02
   5.2560000e-02
   3.1700000e-02
   3.2080000e-02
   3.6140000e-02
   4.7430000e-02
   1.8730000e-02
  -1.7000000e-02
   7.2380000e-02
   1.2750000e-02
  -2.7750000e-02
  -1.5160000e-02
  -1.0100000e-03
  -5.3850000e-02
  -7.2380000e-02
  -2.8730000e-02
  -4.5620000e-02
  -3.9890000e-02
  -8.1650000e-02
  -3.6250000e-02
  -5.1800000e-03
  -2.9860000e-02
  -7.9070000e-02
  -8.3630000e-02
  -5.0200000e-02
  -9.2370000e-02
  -9.1470000e-02
  -7.4550000e-02
  -5.0480000e-02
  -1.8970000e-02
   5.2000000e-04
  -1.3430000e-02
   4.0000000e-02
   2.4920000e-02
   2.6570000e-02
  -2.7000000e-04
   2.9060000e-02
   4.3650000e-02
   3.8700000e-03
   1.6700000e-02
   6.6300000e-02
   2.2670000e-02
   3.4190000e-02
   6.5610000e-02
   9.2950000e-02
   4.4530000e-02
   7.5540000e-02
   1.0657000e-01
   1.0263000e-01
   8.8530000e-02
   6.5970000e-02
   6.3360000e-02
   9.9470000e-02
   1.1003000e-01
   3.8080000e-02
   2.7140000e-02
   4.9160000e-02
   2.8210000e-02
   1.3130000e-02
   2.2670000e-02
   4.1000000e-04
   1.6620000e-02
   1.7470000e-02
   3.1610000e-02
   3.0350000e-02
   7.7600000e-03
  -2.2870000e-02
   4.6010000e-02
   1.5960000e-02
  -1.3020000e-02
  -1.2390000e-02
  -4.4770000e-02
  -3.6030000e-02
  -8.4580000e-02
  -2.4730000e-02
  -9.1250000e-02
  -5.3550000e-02
  -7.5150000e-02
  -7.0850000e-02
  -2.8950000e-02
  -3.0300000e-02
  -6.5390000e-02
  -2.1520000e-02
  -1.4200000e-02
  -3.0900000e-02
  -1.6620000e-02
  -2.4130000e-02
  -2.9670000e-02
  -2.3000000e-02
   2.3880000e-02
  -3.4800000e-03
   1.6150000e-02
  -1.0310000e-02
   9.6000000e-03
   1.6670000e-02
   3.5150000e-02
   2.2100000e-02
   2.2350000e-02
   4.6360000e-02
   3.7670000e-02
   1.1398000e-01
   7.4800000e-02
   7.5210000e-02
   1.2788000e-01
   7.6200000e-02
   1.1203000e-01
   8.2750000e-02
   8.5410000e-02
   1.6200000e-02
   5.1080000e-02
   8.3950000e-02
   2.4480000e-02
   7.0080000e-02
   6.2600000e-02
   7.4220000e-02
   6.9370000e-02
   7.5810000e-02
   1.0158000e-01
   4.1650000e-02
   2.1030000e-02
   4.8970000e-02
   3.2490000e-02
  -2.5530000e-02
  -4.6610000e-02
  -6.1400000e-03
  -1.0054000e-01
  -9.2540000e-02
  -5.8700000e-02
  -9.0890000e-02
  -6.3420000e-02
  -8.6260000e-02
  -3.4330000e-02
  -2.7340000e-02
  -4.2440000e-02
  -5.1460000e-02
  -6.0730000e-02
   1.2640000e-02
  -5.2640000e-02
  -5.9060000e-02
  -4.9570000e-02
  -3.4790000e-02
  -5.9220000e-02
  -9.8710000e-02
  -3.5860000e-02
  -7.1230000e-02
  -4.8090000e-02
  -3.1230000e-02
   3.3810000e-02
   3.0190000e-02
   9.5000000e-02
   9.2260000e-02
   1.2470000e-01
   1.3588000e-01
   1.0635000e-01
   8.9850000e-02
   9.5520000e-02
   5.3080000e-02
   2.3470000e-02
   1.7770000e-02
   4.8610000e-02
   4.7900000e-02
   2.2590000e-02
   4.1040000e-02
   1.0348000e-01
   1.0567000e-01
   1.1773000e-01
   1.0789000e-01
   9.4400000e-02
   9.3440000e-02
   1.0962000e-01
   5.1380000e-02
   6.9600000e-03
   5.7300000e-02
   2.0950000e-02
   9.4000000e-03
   1.1800000e-03
  -9.9000000e-03
   1.3240000e-02
  -1.4120000e-02
  -2.9940000e-02
  -2.0920000e-02
  -2.0650000e-02
  -3.3230000e-02
  -4.8260000e-02
  -1.8510000e-02
  -3.2380000e-02
  -6.6240000e-02
  -8.6830000e-02
  -2.8730000e-02
  -3.0020000e-02
  -1.2985000e-01
  -7.5650000e-02
  -9.0320000e-02
  -7.3590000e-02
  -6.3470000e-02
  -1.1044000e-01
  -3.4880000e-02
  -5.0150000e-02
  -4.7870000e-02
  -3.7070000e-02
   1.1630000e-02
   5.6230000e-02
   9.3500000e-03
   5.3000000e-02
   2.8430000e-02
   4.9930000e-02
   2.2840000e-02
   2.2870000e-02
   3.9180000e-02
   4.8340000e-02
   1.8150000e-02
   4.9430000e-02
   8.3320000e-02
   5.5490000e-02
   6.9420000e-02
   9.5910000e-02
   1.1277000e-01
   1.0688000e-01
   1.1987000e-01
   1.0389000e-01
   1.0030000e-01
   1.2409000e-01
   9.1600000e-02
   9.4650000e-02
   8.5380000e-02
   1.0444000e-01
   6.9230000e-02
   1.9850000e-02
   8.1490000e-02
   2.4620000e-02
   2.2670000e-02
   1.9220000e-02
  -1.8100000e-03
  -6.5300000e-03
  -2.3910000e-02
  -2.7720000e-02
  -1.2940000e-02
  -2.2780000e-02
  -4.2850000e-02
  -2.9090000e-02
  -1.3350000e-02
  -2.1880000e-02
  -5.7170000e-02
  -3.2960000e-02
  -3.1720000e-02
  -4.2640000e-02
  -8.2560000e-02
  -1.1148000e-01
  -4.9110000e-02
  -8.9710000e-02
  -1.3682000e-01
  -7.8720000e-02
  -6.2620000e-02
  -7.0680000e-02
  -5.2370000e-02
  -5.1820000e-02
   7.7000000e-04
  -1.5770000e-02
  -1.0640000e-02
   2.1080000e-02
   3.5900000e-03
   1.7960000e-02
   2.4900000e-02
   3.2710000e-02
   5.3960000e-02
   4.2530000e-02
   4.6360000e-02
   5.8650000e-02
   7.6090000e-02
   1.0457000e-01
   9.5990000e-02
   1.0943000e-01
   1.0526000e-01
   8.9050000e-02
   1.3915000e-01
   9.0100000e-02
   8.1900000e-02
   1.1263000e-01
   1.0548000e-01
   9.2650000e-02
   9.3410000e-02
   1.0095000e-01
   7.8960000e-02
   7.4390000e-02
   7.8990000e-02
   3.2760000e-02
  -4.6090000e-02
  -3.5070000e-02
  -5.0310000e-02
  -5.3490000e-02
  -9.1380000e-02
  -7.8880000e-02
  -4.8310000e-02
  -3.2930000e-02
  -7.3800000e-03
   2.9300000e-03
   3.5100000e-03
  -4.9400000e-03
  -1.3410000e-02
  -4.1870000e-02
  -5.5330000e-02
  -5.7250000e-02
  -6.0320000e-02
  -7.7870000e-02
  -8.6310000e-02
  -1.0079000e-01
  -9.9770000e-02
  -4.9410000e-02
  -4.8860000e-02
  -4.0610000e-02
  -3.5400000e-03
  -2.3300000e-03
   2.4790000e-02
   1.3350000e-02
   5.0040000e-02
   3.7000000e-03
   4.8750000e-02
   3.2190000e-02
   2.2840000e-02
  -1.6150000e-02
   1.0827000e-01
   3.2930000e-02
   1.3630000e-02
   7.1260000e-02
   7.8990000e-02
   6.7120000e-02
   2.9310000e-02
   6.8680000e-02
   9.8620000e-02
   6.0160000e-02
   1.2094000e-01
   1.0246000e-01
   1.3301000e-01
   8.5190000e-02
   1.0827000e-01
   1.4806000e-01
   9.0640000e-02
   5.7500000e-02
   4.4390000e-02
   5.5520000e-02
   2.6680000e-02
   9.3000000e-04
   2.5360000e-02
  -1.5080000e-02
  -2.1410000e-02
   1.5520000e-02
  -4.3460000e-02
   1.4340000e-02
  -7.6390000e-02
  -1.2040000e-02
   1.9660000e-02
  -4.6860000e-02
  -2.2400000e-02
  -5.2370000e-02
  -2.9910000e-02
  -6.3860000e-02
  -5.5490000e-02
  -9.1850000e-02
  -1.0874000e-01
  -7.6470000e-02
  -1.0238000e-01
  -1.0084000e-01
  -7.9790000e-02
  -7.6000000e-02
  -7.6910000e-02
  -3.4190000e-02
  -4.6200000e-02
  -1.4070000e-02
   2.5530000e-02
   3.7800000e-03
   2.6600000e-02
   4.8010000e-02
   6.7670000e-02
   6.1960000e-02
   1.8530000e-02
   2.9800000e-02
   6.4350000e-02
   4.5290000e-02
   5.0040000e-02
   8.4580000e-02
   7.9680000e-02
   8.4580000e-02
   9.5910000e-02
   1.2272000e-01
   8.8940000e-02
   1.3937000e-01
   1.0756000e-01
   1.0666000e-01
   1.1995000e-01
   1.2371000e-01
   6.7340000e-02
   6.6130000e-02
   1.3281000e-01
   7.8690000e-02
   6.4100000e-02
   6.1690000e-02
   4.9540000e-02
   3.4460000e-02
   3.2130000e-02
   4.3460000e-02
   2.1500000e-02
  -3.2400000e-03
  -2.8800000e-03
  -5.7720000e-02
  -1.6290000e-02
  -7.7210000e-02
  -9.0320000e-02
  -8.5190000e-02
  -7.8880000e-02
  -4.0090000e-02
  -7.9400000e-02
  -6.1390000e-02
  -6.5040000e-02
  -6.7720000e-02
  -6.7280000e-02
  -5.4400000e-02
  -5.5690000e-02
  -7.7350000e-02
  -3.3010000e-02
  -2.7420000e-02
  -5.9200000e-02
  -3.5150000e-02
  -4.5760000e-02
  -6.3360000e-02
  -5.0090000e-02
  -2.6430000e-02
  -2.7830000e-02
  -2.2730000e-02
   1.3570000e-02
   2.2020000e-02
   2.5440000e-02
   2.5010000e-02
   1.0315000e-01
   4.3320000e-02
   8.3900000e-02
   9.8600000e-02
   9.3520000e-02
   9.3660000e-02
   1.0756000e-01
   1.3868000e-01
   7.0710000e-02
   8.9220000e-02
   7.4330000e-02
   7.3040000e-02
   1.1620000e-01
   5.2730000e-02
   7.0850000e-02
   9.5470000e-02
   8.4010000e-02
   8.0500000e-02
   4.8170000e-02
   6.7830000e-02
   4.3590000e-02
   3.9500000e-03
   3.6360000e-02
   4.4420000e-02
   3.0160000e-02
   4.8640000e-02
   2.3960000e-02
   2.1300000e-02
   3.5600000e-03
  -4.2030000e-02
  -6.1580000e-02
  -1.2089000e-01
  -6.8740000e-02
  -1.0178000e-01
  -1.2818000e-01
  -6.1440000e-02
  -9.3880000e-02
  -3.1060000e-02
  -5.4150000e-02
  -8.2310000e-02
  -6.9180000e-02
  -8.0800000e-02
  -4.6250000e-02
  -7.6170000e-02
  -7.3670000e-02
  -2.4700000e-03
  -7.6500000e-02
   7.0500000e-03
  -2.9300000e-03
  -5.3710000e-02
   6.9000000e-04
  -1.6480000e-02
   2.7720000e-02
   2.0430000e-02
   5.6450000e-02
   8.3540000e-02
   4.9430000e-02
   1.2278000e-01
   6.4900000e-02
   6.8160000e-02
   9.1910000e-02
   6.4870000e-02
   1.0471000e-01
   1.0644000e-01
   1.1310000e-01
   1.1891000e-01
   8.4370000e-02
   9.6870000e-02
   1.3177000e-01
   8.1270000e-02
   8.7790000e-02
   4.5900000e-02
   5.2530000e-02
   1.1020000e-02
   1.8840000e-02
   6.9260000e-02
   2.9780000e-02
   7.0050000e-02
   5.0810000e-02
   4.6470000e-02
   5.5630000e-02
   3.6820000e-02
   8.1200000e-03
  -1.4260000e-02
  -1.4860000e-02
  -5.3220000e-02
  -7.9050000e-02
  -9.7200000e-02
  -1.1008000e-01
  -1.6615000e-01
  -1.3248000e-01
  -5.3300000e-02
  -9.4590000e-02
  -4.6340000e-02
  -4.7710000e-02
   1.8150000e-02
   4.3600000e-03
  -2.2180000e-02
  -2.2130000e-02
  -7.6300000e-02
  -2.0920000e-02
  -6.7260000e-02
  -8.8830000e-02
  -5.2700000e-02
  -4.6530000e-02
  -5.2400000e-02
