# Supplementary material for: A Novel Classification Method for Flutter Signals Based on the CNN and STFT
Source: Hindawi journal article supplement (doi:10.1155/2019/9375437), 2019-04-09
Supplement: f1 [file 9375437.f1.zip › data_description.txt]

The data of flutter signal are sourced from the sensor of strain and acceleration of the aeroelastic model in the wind tunnel test, 
which is monitored by the first 14 channels of strain sensor and the last 26 channels of acceleration sensor including 27 states 
what the aeroelastic model is set the different test condition in the wind tunnel, because all data of flutter test is too large, 
it is shown that the part of channel flutter signal in the state of 9th and 25th in the file. There is only one effective step data 
been the flutter is sampled in the 9th state. The data of three steps are acquired in the 25th state, including no-flutter data saved 
two steps and flutter data saved one step. the all data is saved as txt format into two different files named: flutter and no-flutter, 
every txt is a channel signal of acceleration or strain sensor. The name of txt is: AA_BB_zCC.C_DDchannel.txt, with brief descriptions as following:
AA:	flutter or no-flutter,00 indicates no-flutter, 01 indicates flutter. 
BB:	the number of states
CC.C: 	the step of wind speed
DD:	the channel of sensor, in which 1~9,32,33,34,35 is the signal of strain sensor,10~31,36,37,38,39, 
It is not in order because the data acquisition device can only show 32 channels, 
but the actual project needs to collect 40 channels, so the signal channel number of partial acceleration and strain sensor is arranged behind
